# Supplementary material for: Zinc finger homeobox-3 (ZFHX3) orchestrates genome-wide daily gene expression in the suprachiasmatic nucleus
Source: bioRxiv preprint, doi:10.1101/2023.11.23.568399, version 6 (2025-02-07)
Supplement: Supplementary Table 1 [file 568399_file15.xlsx]

## Sheet: ZFHX3+K4ME3+K27AC
chr	start	end
chr1	3670396	3671537
chr1	3671758	3672633
chr1	4571570	4571934
chr1	4785323	4786126
chr1	4807537	4808197
chr1	4857431	4858536
chr1	5018165	5018260
chr1	5018438	5020664
chr1	5023507	5023759
chr1	5082877	5083678
chr1	5588657	5588823
chr1	6214171	6215610
chr1	7087952	7089514
chr1	7397040	7397462
chr1	7397600	7398705
chr1	9298423	9298711
chr1	9298800	9300268
chr1	9545468	9546180
chr1	9601289	9601529
chr1	9700570	9700995
chr1	9747306	9748743
chr1	9797846	9798048
chr1	9798366	9798681
chr1	9943728	9944409
chr1	10037741	10038325
chr1	10039696	10040322
chr1	10231970	10233507
chr1	10993329	10994174
chr1	11413946	11414536
chr1	12692960	12693435
chr1	12835843	12835860
chr1	12836083	12836310
chr1	12991912	12992715
chr1	13372042	13374728
chr1	13561586	13561918
chr1	13589051	13589856
chr1	13589941	13590001
chr1	13660093	13660758
chr1	14309590	14310167
chr1	14755074	14756031
chr1	15286391	15287875
chr1	15805533	15806410
chr1	16092817	16093436
chr1	16104075	16106448
chr1	16518640	16518912
chr1	16519027	16519306
chr1	16519384	16519583
chr1	16519732	16520204
chr1	16618480	16619576
chr1	16656337	16657586
chr1	16665042	16665680
chr1	17096939	17097330
chr1	17097578	17097666
chr1	17145296	17146044
chr1	18058035	18059000
chr1	20890406	20891520
chr1	20951207	20952145
chr1	21079351	21079842
chr1	21166431	21166606
chr1	21218270	21218992
chr1	21960646	21962174
chr1	22533343	22533682
chr1	22533811	22534126
chr1	22803618	22803815
chr1	22805059	22805992
chr1	22806129	22806935
chr1	23255968	23255977
chr1	23256361	23257141
chr1	23382537	23383101
chr1	23383313	23383667
chr1	23761861	23762732
chr1	23763017	23763227
chr1	23763309	23763495
chr1	23763602	23763787
chr1	23921680	23922188
chr1	24005172	24005784
chr1	24099549	24101132
chr1	24677669	24677860
chr1	24678154	24679115
chr1	24679327	24679516
chr1	25033703	25033794
chr1	25228693	25229077
chr1	25827168	25827377
chr1	25827503	25827701
chr1	25829096	25829637
chr1	25829766	25830178
chr1	25830469	25830873
chr1	30872838	30874237
chr1	30948943	30950224
chr1	32172495	32173237
chr1	33669754	33670639
chr1	33719712	33720534
chr1	33757409	33758170
chr1	33813378	33814811
chr1	33906382	33906686
chr1	33906882	33907736
chr1	33907882	33908660
chr1	34005632	34006711
chr1	34006796	34007098
chr1	34011033	34012077
chr1	34433069	34433472
chr1	34434898	34435126
chr1	34439051	34440292
chr1	34578882	34580357
chr1	34749945	34750513
chr1	34750664	34751175
chr1	34801652	34802890
chr1	34842423	34842731
chr1	34842948	34843290
chr1	34849834	34850214
chr1	36064825	36065148
chr1	36067775	36068251
chr1	36068626	36069298
chr1	36243835	36244401
chr1	36307786	36308137
chr1	36368368	36369184
chr1	36444858	36445313
chr1	36471008	36471550
chr1	36471740	36472336
chr1	36511558	36512209
chr1	36512517	36512948
chr1	36546373	36547341
chr1	36555840	36556043
chr1	36556144	36558337
chr1	36558506	36558580
chr1	36580493	36580779
chr1	36691242	36692147
chr1	36709329	36710161
chr1	36744400	36744602
chr1	36785013	36785167
chr1	36938827	36940187
chr1	37029135	37029368
chr1	37219549	37219754
chr1	37299910	37300624
chr1	37300825	37301046
chr1	37429538	37430635
chr1	37540410	37540800
chr1	37541198	37541492
chr1	37719362	37719724
chr1	37719899	37720199
chr1	37725959	37726174
chr1	37864502	37865112
chr1	37865350	37865755
chr1	37872161	37872798
chr1	37890233	37890420
chr1	37890619	37890648
chr1	37996555	37998627
chr1	38128887	38129680
chr1	38129773	38130350
chr1	38198403	38198519
chr1	38626458	38627229
chr1	38627664	38628158
chr1	38835560	38836846
chr1	38847844	38848341
chr1	38893345	38893530
chr1	38897238	38898339
chr1	38987022	38988148
chr1	38988351	38988661
chr1	39192449	39192710
chr1	39192914	39193841
chr1	39193982	39194511
chr1	39367495	39368932
chr1	39477923	39479047
chr1	39535318	39535545
chr1	39535742	39536488
chr1	39576468	39577611
chr1	39649884	39651334
chr1	39720641	39720892
chr1	39899980	39900920
chr1	39901131	39901703
chr1	39901783	39902427
chr1	39902705	39902928
chr1	39936403	39936900
chr1	40085617	40085988
chr1	40266615	40266801
chr1	40790236	40790534
chr1	40790773	40790838
chr1	42539141	42539337
chr1	42539549	42539841
chr1	42684373	42685108
chr1	42686275	42687061
chr1	42693810	42694242
chr1	42694451	42695389
chr1	42695804	42696952
chr1	42697433	42697859
chr1	42698860	42699505
chr1	42703426	42703735
chr1	42713365	42713978
chr1	42714229	42714520
chr1	42850999	42851709
chr1	42952795	42953353
chr1	42953491	42953795
chr1	43006074	43006649
chr1	43092007	43092397
chr1	43092537	43093145
chr1	43098029	43098214
chr1	43098365	43099133
chr1	43445348	43445710
chr1	43445838	43446986
chr1	43826956	43827807
chr1	43828137	43828188
chr1	43933249	43934618
chr1	44102029	44102786
chr1	44118436	44119431
chr1	44119533	44120312
chr1	44147608	44148378
chr1	44551792	44552584
chr1	45794905	45795869
chr1	45925710	45926022
chr1	46066748	46067304
chr1	46852633	46854391
chr1	50925212	50926019
chr1	50926251	50928272
chr1	50928921	50929123
chr1	51477750	51478776
chr1	51915319	51916158
chr1	52113338	52113809
chr1	52119228	52120010
chr1	52232007	52233762
chr1	52499622	52500226
chr1	52500623	52501029
chr1	52630578	52631117
chr1	52726436	52727723
chr1	52817024	52817857
chr1	52844790	52845431
chr1	52845616	52845806
chr1	52952482	52953638
chr1	53296703	53297457
chr1	53313270	53313975
chr1	53352330	53352866
chr1	53706449	53707099
chr1	54193930	54194589
chr1	54194671	54195429
chr1	54250230	54250605
chr1	54438664	54439039
chr1	54556804	54557848
chr1	54558020	54558257
chr1	54735001	54735109
chr1	54925695	54926769
chr1	55026567	55027685
chr1	55052194	55053334
chr1	55086885	55088737
chr1	55130874	55131924
chr1	55237251	55237762
chr1	55237954	55238384
chr1	55405087	55407121
chr1	57377544	57378225
chr1	57405907	57407116
chr1	57428946	57429330
chr1	57774564	57775909
chr1	57969516	57970337
chr1	57995699	57995932
chr1	58029926	58030126
chr1	58030422	58030658
chr1	58391966	58394025
chr1	58422984	58424088
chr1	58445083	58446050
chr1	58504436	58504917
chr1	58585717	58586662
chr1	58652568	58653079
chr1	58711422	58711957
chr1	58713316	58713645
chr1	58972942	58974294
chr1	59119793	59120730
chr1	59236803	59238090
chr1	59481440	59481783
chr1	59482138	59482491
chr1	59482793	59483245
chr1	59516322	59516808
chr1	59574605	59574987
chr1	59670375	59671107
chr1	59684476	59684664
chr1	59684814	59685611
chr1	59762649	59763352
chr1	59763432	59764224
chr1	59764462	59764911
chr1	59912463	59914134
chr1	60042449	60042909
chr1	60097516	60098814
chr1	60180067	60181287
chr1	60342925	60343663
chr1	60408933	60410385
chr1	60565493	60566853
chr1	60567035	60567300
chr1	60860790	60861227
chr1	61139416	61139612
chr1	61181341	61181444
chr1	61472856	61473092
chr1	61638875	61639492
chr1	62702807	62703985
chr1	62704871	62707856
chr1	62717242	62717875
chr1	62783499	62783729
chr1	62794276	62794461
chr1	63112821	63113057
chr1	63113452	63113958
chr1	63114512	63114929
chr1	63176203	63177586
chr1	63247113	63247361
chr1	63248096	63248880
chr1	63252816	63253059
chr1	63257272	63257518
chr1	63272584	63274277
chr1	63274380	63274669
chr1	63445438	63446700
chr1	63668763	63668986
chr1	63730320	63730827
chr1	64066628	64067238
chr1	64119156	64119799
chr1	64119905	64120744
chr1	64120997	64121427
chr1	64121583	64122612
chr1	64338172	64338179
chr1	64531979	64532928
chr1	64533528	64533759
chr1	64616524	64616589
chr1	64616833	64617917
chr1	64691105	64691634
chr1	64737155	64737706
chr1	64738031	64738227
chr1	64919205	64919471
chr1	64956421	64957038
chr1	65178133	65179842
chr1	65186040	65187143
chr1	66174908	66176062
chr1	66176182	66176401
chr1	66321616	66322332
chr1	66323526	66323779
chr1	66386856	66387041
chr1	66388597	66388890
chr1	66467764	66468990
chr1	66700693	66701518
chr1	66815836	66816021
chr1	66816208	66816945
chr1	66817076	66818218
chr1	66862834	66863271
chr1	66895982	66896134
chr1	66988075	66988190
chr1	67038235	67038953
chr1	69105557	69106006
chr1	69106121	69108313
chr1	69687518	69687973
chr1	69790443	69791025
chr1	69826699	69827230
chr1	70725550	70725875
chr1	70726122	70726329
chr1	71556827	71557589
chr1	71775980	71776297
chr1	72211820	72212277
chr1	72225711	72226584
chr1	72236189	72237254
chr1	72243719	72244256
chr1	72254217	72254402
chr1	72254585	72255517
chr1	72283993	72284624
chr1	72307273	72307782
chr1	72534801	72535115
chr1	72536073	72537212
chr1	72582891	72583763
chr1	72640970	72641112
chr1	72710857	72711946
chr1	72870732	72870933
chr1	72871108	72871293
chr1	72871564	72872435
chr1	72873772	72874279
chr1	72874601	72875114
chr1	73962829	73962990
chr1	74236229	74237328
chr1	74284456	74284726
chr1	74285007	74285624
chr1	74303687	74304220
chr1	74332380	74332811
chr1	74332953	74333154
chr1	74386548	74387324
chr1	74391332	74391671
chr1	74391862	74392524
chr1	74397124	74397316
chr1	74397532	74398173
chr1	74505403	74505571
chr1	74505745	74506903
chr1	74587030	74588602
chr1	74600980	74601338
chr1	74661696	74662162
chr1	74713518	74713707
chr1	74803078	74803631
chr1	74806525	74806676
chr1	74806904	74807469
chr1	74807640	74807744
chr1	74816459	74817590
chr1	74855137	74856827
chr1	74857283	74859180
chr1	75124601	75125361
chr1	75141310	75142065
chr1	75142215	75143505
chr1	75168559	75169058
chr1	75179833	75180283
chr1	75191486	75192745
chr1	75209239	75209450
chr1	75210551	75211098
chr1	75218238	75219992
chr1	75235882	75236333
chr1	75236463	75237374
chr1	75251551	75251655
chr1	75263144	75263997
chr1	75264127	75264987
chr1	75277344	75277782
chr1	75278177	75278463
chr1	75316965	75317615
chr1	75318163	75318221
chr1	75381600	75382039
chr1	75382201	75382967
chr1	75435904	75436448
chr1	75450703	75450945
chr1	75458276	75458729
chr1	75477662	75478119
chr1	75478261	75478446
chr1	75478708	75480372
chr1	75505167	75506610
chr1	75521400	75521959
chr1	75545928	75546954
chr1	75547122	75547345
chr1	75559330	75559589
chr1	77512431	77512956
chr1	77513416	77513928
chr1	77514073	77514914
chr1	77515332	77515666
chr1	78310387	78311016
chr1	78488481	78489190
chr1	78511621	78512121
chr1	78537508	78537797
chr1	78657530	78658573
chr1	78658656	78658886
chr1	79439700	79439968
chr1	79450208	79450952
chr1	79581016	79581714
chr1	79761282	79761894
chr1	79776065	79776455
chr1	79858046	79858657
chr1	79858815	79859003
chr1	80339321	80340419
chr1	80340509	80341368
chr1	80757387	80757599
chr1	80758092	80758811
chr1	81076291	81076548
chr1	81076907	81077110
chr1	81077530	81077782
chr1	81593865	81594053
chr1	82282991	82283751
chr1	82283872	82284259
chr1	82286647	82286878
chr1	82289679	82293094
chr1	82316170	82317205
chr1	82724683	82725869
chr1	82839192	82840198
chr1	83038055	83038615
chr1	83345840	83345947
chr1	83407827	83408305
chr1	84284095	84284662
chr1	84694710	84696641
chr1	84709406	84709727
chr1	84709847	84710684
chr1	84838315	84838509
chr1	84838643	84840374
chr1	84933813	84935123
chr1	85793237	85794681
chr1	85894438	85896306
chr1	85896724	85897124
chr1	85898686	85898889
chr1	85933863	85934018
chr1	86018415	86018780
chr1	86045868	86046608
chr1	86059452	86059669
chr1	86064333	86065481
chr1	86154578	86155120
chr1	86303432	86303771
chr1	86358558	86359996
chr1	86434029	86434311
chr1	86434469	86435137
chr1	86435307	86435810
chr1	86440192	86441144
chr1	86441225	86443261
chr1	86472159	86472366
chr1	86487093	86488181
chr1	86503884	86504894
chr1	86524701	86528903
chr1	86582175	86583103
chr1	86587009	86587372
chr1	86670338	86670650
chr1	86703279	86704335
chr1	87155822	87156014
chr1	87213602	87214489
chr1	87326638	87327203
chr1	87327312	87327896
chr1	87509196	87510363
chr1	87755802	87756669
chr1	87853315	87854254
chr1	88007864	88008680
chr1	88205242	88205587
chr1	88277063	88277772
chr1	88700223	88700812
chr1	88700943	88702662
chr1	88705818	88706703
chr1	89069878	89071228
chr1	89302845	89303035
chr1	89454151	89454372
chr1	89454451	89455364
chr1	89455457	89456165
chr1	89550206	89550424
chr1	89576838	89577371
chr1	89580180	89581854
chr1	89750964	89751008
chr1	89968101	89968335
chr1	89968427	89968901
chr1	90203893	90204498
chr1	90603108	90603811
chr1	90744093	90744372
chr1	90974951	90975262
chr1	90998425	90999412
chr1	91052841	91052889
chr1	91179742	91180060
chr1	91180196	91180441
chr1	91180745	91180939
chr1	91249575	91250952
chr1	91297868	91298699
chr1	91397961	91399217
chr1	91412544	91413464
chr1	91458635	91459992
chr1	91494654	91495004
chr1	91539890	91540282
chr1	91540553	91541345
chr1	92179057	92179818
chr1	92180503	92181463
chr1	92473310	92473978
chr1	92641663	92642238
chr1	92831686	92832711
chr1	92847869	92848240
chr1	92848460	92849614
chr1	92906888	92907813
chr1	92910024	92910222
chr1	92910471	92910798
chr1	92911094	92911729
chr1	92911839	92912321
chr1	92934203	92935118
chr1	93100192	93102141
chr1	93102465	93102686
chr1	93235807	93236652
chr1	93305686	93306144
chr1	93342964	93343967
chr1	93445005	93445507
chr1	93477915	93479925
chr1	93511489	93512703
chr1	93634742	93636230
chr1	93685530	93685701
chr1	93685853	93686808
chr1	93753852	93755451
chr1	93801642	93802321
chr1	93803435	93804447
chr1	93824701	93825714
chr1	94035192	94035607
chr1	95313290	95314509
chr1	95665268	95665687
chr1	95665901	95666118
chr1	95667027	95668299
chr1	96871797	96872492
chr1	97660646	97662286
chr1	97769322	97770732
chr1	97976780	97977410
chr1	98047726	98048134
chr1	98094944	98096072
chr1	99772550	99772553
chr1	104768454	104768669
chr1	104768807	104769570
chr1	105355667	105357090
chr1	105663244	105664936
chr1	105780930	105781038
chr1	105989955	105990887
chr1	105991052	105992143
chr1	105993241	105994141
chr1	106171165	106171423
chr1	106171675	106172079
chr1	106172300	106173532
chr1	106712427	106712912
chr1	106713557	106714277
chr1	106714610	106714949
chr1	106759179	106760370
chr1	106796011	106797086
chr1	109981934	109982212
chr1	109982320	109983711
chr1	111864090	111865089
chr1	112416604	112416814
chr1	115684546	115684923
chr1	118310777	118311557
chr1	118321682	118322260
chr1	118388328	118390273
chr1	118435088	118435416
chr1	118458916	118459920
chr1	119053211	119053345
chr1	119420399	119420572
chr1	119421317	119422259
chr1	119504263	119504738
chr1	119525727	119526542
chr1	119648379	119649033
chr1	119836694	119836890
chr1	119837029	119837976
chr1	119913005	119913694
chr1	120119717	120120404
chr1	120120644	120121785
chr1	121327162	121328517
chr1	121431081	121431743
chr1	121567590	121568095
chr1	124043993	124044828
chr1	124044986	124045568
chr1	124045696	124046072
chr1	125434584	125436070
chr1	125560146	125561541
chr1	125911060	125911178
chr1	125911690	125912157
chr1	126492538	126492849
chr1	127204767	127206647
chr1	127537319	127537447
chr1	127676659	127677053
chr1	127677177	127678251
chr1	127678392	127678422
chr1	127773672	127774952
chr1	127868515	127869222
chr1	128102390	128104052
chr1	128243902	128244730
chr1	128416559	128417769
chr1	128472399	128472846
chr1	128591755	128592119
chr1	129273225	129274164
chr1	130462175	130462874
chr1	130715206	130718081
chr1	131096723	131097922
chr1	131137781	131138683
chr1	131153081	131153509
chr1	131244296	131244492
chr1	131244580	131246079
chr1	131525154	131525459
chr1	131525569	131526036
chr1	131526222	131527376
chr1	131658204	131658214
chr1	131827537	131828869
chr1	131867337	131867575
chr1	131910084	131911497
chr1	132007327	132008544
chr1	132067341	132068195
chr1	132138511	132139079
chr1	132139336	132139765
chr1	132190209	132190484
chr1	132190625	132191320
chr1	132191520	132191676
chr1	132298518	132299636
chr1	132316148	132316535
chr1	132389974	132391573
chr1	132391746	132392019
chr1	132417240	132418204
chr1	132476852	132477781
chr1	132538818	132538968
chr1	132540308	132540566
chr1	132542102	132543373
chr1	132739022	132739679
chr1	132741109	132742028
chr1	132758832	132759332
chr1	132759416	132759426
chr1	132879701	132880246
chr1	132880432	132881989
chr1	133024944	133025528
chr1	133033604	133033796
chr1	133034053	133034128
chr1	133045966	133047232
chr1	133130681	133130866
chr1	133130999	133132700
chr1	133164053	133164264
chr1	133181028	133182098
chr1	133182220	133183109
chr1	133183277	133183468
chr1	133209767	133210137
chr1	133363504	133364096
chr1	133418179	133418357
chr1	133422821	133423184
chr1	133423282	133424399
chr1	133492988	133493537
chr1	133609726	133610394
chr1	133660541	133660879
chr1	133661124	133661748
chr1	133800580	133800855
chr1	133801040	133801292
chr1	133887078	133887263
chr1	133908685	133909301
chr1	134046543	134046693
chr1	134060884	134061641
chr1	134077373	134077615
chr1	134078475	134079685
chr1	134092580	134093657
chr1	134099213	134099400
chr1	134099725	134099886
chr1	134182104	134182282
chr1	134234282	134235335
chr1	134343734	134343935
chr1	134344084	134344753
chr1	134361314	134362420
chr1	134406042	134406265
chr1	134415228	134416018
chr1	134454930	134455838
chr1	134494450	134495275
chr1	134556106	134557340
chr1	134560021	134561535
chr1	134846298	134846449
chr1	134955420	134955977
chr1	134987524	134988107
chr1	135146164	135147934
chr1	135148101	135148492
chr1	135154473	135154940
chr1	135166990	135167451
chr1	135248492	135248777
chr1	135283178	135284257
chr1	135313183	135314024
chr1	135368227	135368791
chr1	135368963	135369270
chr1	135374438	135374755
chr1	135374850	135375653
chr1	135430128	135430979
chr1	135510147	135510849
chr1	135579994	135580263
chr1	135581709	135582025
chr1	135582905	135584168
chr1	135584294	135585394
chr1	135585559	135585926
chr1	135670472	135670581
chr1	135687689	135688091
chr1	135699345	135699462
chr1	135728935	135729566
chr1	135729983	135730169
chr1	135730501	135730773
chr1	135765855	135766919
chr1	135767334	135767549
chr1	136017898	136018819
chr1	136051128	136051172
chr1	136131276	136132463
chr1	136133108	136133470
chr1	136140073	136140758
chr1	136259728	136260972
chr1	136326040	136326120
chr1	136344945	136346364
chr1	136414978	136415692
chr1	136624575	136625063
chr1	136625145	136626001
chr1	137898394	137899068
chr1	137900352	137900812
chr1	138617798	138618198
chr1	138618937	138619948
chr1	138620032	138620231
chr1	138856584	138856881
chr1	138963135	138964007
chr1	139421931	139422763
chr1	140245488	140246355
chr1	143640701	143641041
chr1	143641232	143641417
chr1	143702154	143703235
chr1	143739306	143739871
chr1	143740125	143740367
chr1	143776443	143777065
chr1	143777270	143777740
chr1	144003498	144005023
chr1	146494869	146495400
chr1	146497348	146498283
chr1	146498431	146499035
chr1	150392404	150393902
chr1	151344027	151345710
chr1	151428068	151429234
chr1	151500023	151501268
chr1	151754822	151756033
chr1	152089169	152091208
chr1	152386224	152386711
chr1	152399950	152400524
chr1	152624912	152625403
chr1	152765328	152765579
chr1	152765702	152766345
chr1	152766604	152767408
chr1	152901792	152902668
chr1	152902749	152903373
chr1	152903528	152904005
chr1	152904479	152904806
chr1	152954907	152955438
chr1	152955579	152956158
chr1	153331921	153333682
chr1	153333781	153334081
chr1	153424295	153424480
chr1	153424743	153425542
chr1	153486740	153488054
chr1	153549501	153549743
chr1	153652894	153653588
chr1	153654389	153654593
chr1	153665176	153665370
chr1	153665510	153665801
chr1	153666475	153666501
chr1	153679098	153679445
chr1	153739743	153739947
chr1	153740243	153741462
chr1	153742046	153742239
chr1	153899041	153899293
chr1	153899493	153901309
chr1	154102883	154103076
chr1	154118222	154118407
chr1	154723655	154724241
chr1	154725403	154725884
chr1	154725975	154727013
chr1	154883009	154883379
chr1	154883694	154883986
chr1	154884370	154884609
chr1	155082931	155084152
chr1	155098171	155099614
chr1	155158455	155159358
chr1	155234146	155234342
chr1	155244001	155244738
chr1	155416631	155417610
chr1	155557679	155558902
chr1	155812337	155813456
chr1	155972387	155974088
chr1	156035422	156036724
chr1	156040683	156041063
chr1	156302971	156303606
chr1	156420997	156421182
chr1	156473983	156474394
chr1	156558272	156559682
chr1	156581267	156581659
chr1	156673737	156674659
chr1	156718252	156718873
chr1	156718987	156719338
chr1	156938717	156939307
chr1	156939706	156940446
chr1	157411626	157412833
chr1	158355310	158356673
chr1	158362580	158363454
chr1	159231465	159231669
chr1	159231776	159232579
chr1	159232671	159233022
chr1	159523643	159524533
chr1	159614800	159615325
chr1	160194887	160194978
chr1	160195241	160195697
chr1	160212213	160213727
chr1	160350827	160351691
chr1	160351838	160352642
chr1	160792069	160792927
chr1	160905992	160906889
chr1	161034188	161034990
chr1	161035134	161036124
chr1	161070213	161070743
chr1	161070998	161071109
chr1	161130877	161131557
chr1	161142617	161143100
chr1	161250178	161250397
chr1	161250576	161251185
chr1	161876194	161876836
chr1	161968944	161969729
chr1	162476632	162477104
chr1	162477267	162478146
chr1	162548330	162548775
chr1	162570319	162571693
chr1	162739320	162739505
chr1	162739739	162740793
chr1	163311855	163312488
chr1	163313222	163313504
chr1	163314037	163314251
chr1	163403453	163404011
chr1	163779607	163780098
chr1	163929499	163930582
chr1	163994870	163994903
chr1	164248512	164248953
chr1	164249052	164249710
chr1	164275460	164275913
chr1	164306952	164307731
chr1	164454745	164455453
chr1	164455640	164459280
chr1	164461828	164462047
chr1	164898801	164899352
chr1	165091575	165092013
chr1	165193862	165194746
chr1	165236431	165237598
chr1	165281861	165282576
chr1	165459614	165461820
chr1	165610950	165611039
chr1	165633925	165635128
chr1	165641834	165642153
chr1	165642243	165642865
chr1	165642955	165643201
chr1	165763746	165764142
chr1	166001269	166002739
chr1	166003057	166003719
chr1	166254333	166254821
chr1	166255746	166255933
chr1	166256190	166256582
chr1	166282401	166282917
chr1	166308898	166309499
chr1	166378598	166379718
chr1	166379807	166380190
chr1	166409333	166410145
chr1	166939910	166940260
chr1	167000423	167001018
chr1	167001107	167002121
chr1	167283773	167285303
chr1	167308094	167309077
chr1	167340259	167340268
chr1	167349742	167350647
chr1	167393534	167394479
chr1	167598210	167599070
chr1	167599297	167599531
chr1	167644934	167645025
chr1	167802936	167803247
chr1	168221217	168221508
chr1	168356968	168357496
chr1	168357786	168357971
chr1	168358246	168358533
chr1	168430945	168431229
chr1	168432449	168432714
chr1	169531616	169531847
chr1	169747243	169747525
chr1	169747673	169748242
chr1	169748640	169748825
chr1	169969179	169969667
chr1	170174461	170175374
chr1	170214856	170215451
chr1	170255166	170255867
chr1	170292779	170292962
chr1	170589040	170590195
chr1	170644339	170644675
chr1	170867363	170867972
chr1	170868549	170868927
chr1	170884867	170885573
chr1	170907360	170908856
chr1	171044470	171044867
chr1	171101807	171102177
chr1	171102562	171102906
chr1	171110711	171111499
chr1	171113787	171114282
chr1	171150062	171150711
chr1	171195873	171196320
chr1	171221021	171221152
chr1	171221380	171222828
chr1	171246726	171247480
chr1	171251139	171251590
chr1	171270173	171270826
chr1	171281268	171281733
chr1	171287208	171288236
chr1	171294307	171294967
chr1	171328226	171328688
chr1	171328800	171329951
chr1	171330104	171330330
chr1	171345292	171345972
chr1	171360230	171361836
chr1	171410961	171412436
chr1	171503277	171504321
chr1	172026340	172027935
chr1	172082473	172083169
chr1	172126793	172127189
chr1	172147717	172148881
chr1	172201987	172202210
chr1	172205289	172205587
chr1	172205708	172205914
chr1	172206052	172206772
chr1	172206916	172207136
chr1	172296924	172297136
chr1	172309809	172310275
chr1	172311071	172311130
chr1	172311286	172311569
chr1	172311805	172313408
chr1	172313844	172314087
chr1	172315276	172315484
chr1	172326350	172326593
chr1	172328860	172329517
chr1	172350426	172350696
chr1	172376143	172377197
chr1	172481784	172482303
chr1	172500265	172500757
chr1	172550495	172550749
chr1	172562688	172563596
chr1	172632556	172633465
chr1	173366090	173366455
chr1	173366652	173368126
chr1	173389957	173390170
chr1	174501619	174503819
chr1	174537020	174537139
chr1	174921444	174921817
chr1	175491617	175492960
chr1	175625121	175625853
chr1	175692034	175692802
chr1	175880421	175880967
chr1	176213624	176214038
chr1	176274940	176275294
chr1	176275521	176275694
chr1	176813100	176815075
chr1	177257091	177259231
chr1	177338927	177339241
chr1	177441437	177441984
chr1	177442525	177442728
chr1	177442997	177443473
chr1	177795770	177796963
chr1	177982991	177983839
chr1	178187249	178188081
chr1	178188427	178188459
chr1	178275911	178276760
chr1	178317779	178319810
chr1	178336362	178338105
chr1	178368750	178369587
chr1	178405453	178406786
chr1	178527345	178531290
chr1	178798637	178798822
chr1	179517595	179518099
chr1	179545608	179546929
chr1	179667891	179668691
chr1	179802813	179804247
chr1	179959070	179959779
chr1	179959984	179960226
chr1	179960315	179960638
chr1	179961174	179961454
chr1	179961832	179962030
chr1	180195646	180196354
chr1	180249996	180250367
chr1	180255693	180256625
chr1	180330742	180331280
chr1	180331550	180332866
chr1	180364013	180364336
chr1	180365170	180365806
chr1	180387392	180387495
chr1	180387745	180387852
chr1	180421214	180421473
chr1	180421658	180421984
chr1	180482979	180483400
chr1	180568774	180569552
chr1	180641510	180641593
chr1	180641773	180641944
chr1	180725752	180726696
chr1	180767919	180768952
chr1	180777394	180778609
chr1	180812449	180812902
chr1	180813025	180813630
chr1	180813766	180814596
chr1	180848470	180848885
chr1	180849820	180851371
chr1	180904140	180904961
chr1	180942075	180942906
chr1	181017283	181017471
chr1	181143638	181144755
chr1	181150802	181151356
chr1	181210564	181211747
chr1	181211878	181212727
chr1	181256445	181256790
chr1	181352809	181353006
chr1	181841787	181842776
chr1	182019189	182019725
chr1	182020123	182020835
chr1	182124588	182125287
chr1	182281936	182282986
chr1	182340954	182341798
chr1	182408522	182409733
chr1	182489950	182490314
chr1	182516847	182517956
chr1	182539075	182539564
chr1	182763404	182764057
chr1	182764161	182765383
chr1	182792584	182792808
chr1	182959650	182959996
chr1	182960133	182960413
chr1	183221078	183221593
chr1	183296455	183297341
chr1	183297615	183297966
chr1	183344933	183345484
chr1	183345752	183346002
chr1	183368549	183369992
chr1	183388601	183388811
chr1	183389083	183389159
chr1	184033268	184034609
chr1	184034781	184035132
chr1	184235610	184235947
chr1	184845243	184846005
chr1	184997508	184997861
chr1	184999091	184999545
chr1	184999971	185000613
chr1	185203521	185204625
chr1	185209952	185210068
chr1	185328920	185329436
chr1	185331959	185332395
chr1	185362724	185363726
chr1	185454995	185455805
chr1	186116887	186117398
chr1	186704308	186704681
chr1	186705082	186705776
chr1	186749059	186749805
chr1	187215373	187215917
chr1	187651149	187651404
chr1	187651757	187651998
chr1	189007102	189008078
chr1	189342594	189343177
chr1	189343327	189344100
chr1	189344228	189344414
chr1	189921507	189922648
chr1	190168775	190169065
chr1	190169230	190169596
chr1	190169873	190170803
chr1	190171324	190171442
chr1	190171802	190171822
chr1	190174722	190175689
chr1	190911322	190912327
chr1	190927846	190928802
chr1	190929013	190929249
chr1	190978333	190979008
chr1	191025224	191026815
chr1	191062426	191062896
chr1	191224380	191225025
chr1	191312661	191312864
chr1	191317333	191318475
chr1	191325559	191326768
chr1	191396117	191396446
chr1	191396615	191397211
chr1	191397315	191398060
chr1	191575702	191576398
chr1	191717680	191718445
chr1	191718563	191719601
chr1	191821171	191821298
chr1	191906008	191906429
chr1	191906622	191907464
chr1	191990171	191990399
chr1	192092053	192092412
chr1	192136213	192137639
chr1	192137718	192138914
chr1	192190745	192191700
chr1	192770072	192771247
chr1	192834343	192835675
chr1	192854623	192855410
chr1	192855540	192855778
chr1	192855914	192856072
chr1	193035013	193035803
chr1	193036023	193036267
chr1	193129698	193130441
chr1	193172646	193172790
chr1	193173037	193173925
chr1	193272446	193273130
chr1	193273301	193273538
chr1	193369535	193370224
chr1	193382745	193382918
chr1	194619393	194621018
chr1	194621400	194621471
chr1	194976137	194977783
chr1	194978562	194978747
chr1	195017080	195017623
chr1	195017738	195018456
chr1	195018627	195019622
chr1	195020262	195020462
chr1	195130895	195131652
chr1	195241687	195241896
chr10	3365852	3367285
chr10	3740217	3740559
chr10	3740701	3741187
chr10	3972838	3974059
chr10	4265531	4265928
chr10	4266316	4266770
chr10	4267026	4267350
chr10	4386565	4388074
chr10	4388158	4388520
chr10	4431750	4432528
chr10	4432636	4433241
chr10	4712504	4712755
chr10	5194451	5194980
chr10	5367429	5367675
chr10	5368281	5368574
chr10	5548714	5548915
chr10	5549985	5550975
chr10	5805581	5806295
chr10	5806386	5806646
chr10	5823705	5824719
chr10	5921018	5921449
chr10	5921586	5922322
chr10	5922438	5922712
chr10	6035887	6035993
chr10	6788556	6788943
chr10	7211220	7212430
chr10	7589669	7590759
chr10	7662678	7663736
chr10	7667275	7667694
chr10	7680531	7681903
chr10	7725870	7726320
chr10	7780310	7780919
chr10	7792550	7793395
chr10	7955064	7955634
chr10	7955757	7956030
chr10	7956154	7956973
chr10	8176593	8176859
chr10	8518246	8519020
chr10	8801078	8801614
chr10	8885695	8886653
chr10	9117305	9117683
chr10	9165733	9166332
chr10	9673663	9673876
chr10	9674321	9676412
chr10	9900244	9901856
chr10	9901974	9902099
chr10	10321106	10321484
chr10	11080345	11081045
chr10	11081439	11081658
chr10	11081867	11082173
chr10	11149420	11150387
chr10	11280559	11281531
chr10	11281667	11282077
chr10	11343103	11343811
chr10	11343921	11344158
chr10	11344666	11344846
chr10	12868097	12868722
chr10	12868982	12869626
chr10	12922665	12923443
chr10	13008525	13008956
chr10	13090426	13090487
chr10	13090824	13091006
chr10	13192889	13193316
chr10	13323917	13324168
chr10	13388588	13388891
chr10	13473993	13474203
chr10	13500933	13501556
chr10	13501825	13502023
chr10	13552785	13553455
chr10	13868189	13869286
chr10	13964442	13968159
chr10	13982827	13983377
chr10	13983624	13983917
chr10	14704908	14705780
chr10	17721745	17722148
chr10	17722315	17724221
chr10	17724307	17724492
chr10	17947157	17947579
chr10	18022418	18022514
chr10	18022826	18023203
chr10	18055301	18055842
chr10	18055937	18056458
chr10	18234497	18235434
chr10	18318806	18319488
chr10	18431057	18431276
chr10	18526844	18526870
chr10	18545679	18546210
chr10	18549442	18550115
chr10	18742066	18742697
chr10	18743322	18744179
chr10	18845112	18845268
chr10	19014976	19015622
chr10	19015770	19015819
chr10	19591949	19592460
chr10	19907284	19907770
chr10	19933452	19935064
chr10	20148736	20149971
chr10	20170022	20171525
chr10	20171878	20172069
chr10	20286494	20286923
chr10	20311454	20313275
chr10	20547887	20548428
chr10	20723242	20723500
chr10	20724899	20725151
chr10	20952037	20953276
chr10	20954253	20954627
chr10	21055469	21055482
chr10	21144815	21145431
chr10	21295653	21296605
chr10	21881867	21883223
chr10	21883479	21883938
chr10	21923465	21923769
chr10	21923859	21924148
chr10	21992811	21993343
chr10	21993877	21994934
chr10	22058290	22058613
chr10	22058925	22059122
chr10	22644901	22645725
chr10	22730541	22732175
chr10	23786548	23787789
chr10	23796851	23797355
chr10	24149229	24149827
chr10	24711638	24712399
chr10	24869832	24870383
chr10	25199936	25200376
chr10	25296634	25297400
chr10	25359906	25360726
chr10	26078000	26079162
chr10	26373887	26374027
chr10	26374141	26374352
chr10	26374607	26375141
chr10	26375328	26375513
chr10	26375903	26376404
chr10	26695230	26695690
chr10	26752691	26753108
chr10	26772261	26772886
chr10	28074322	28075685
chr10	28076191	28076549
chr10	28493448	28493760
chr10	29143606	29144221
chr10	29146598	29148210
chr10	29148331	29148790
chr10	29313038	29313753
chr10	29361385	29362345
chr10	30600282	30600946
chr10	30617710	30617927
chr10	30618068	30618730
chr10	30802151	30802350
chr10	30802484	30802900
chr10	30802987	30803960
chr10	30810907	30811122
chr10	30842388	30842729
chr10	31313441	31313785
chr10	31445348	31445771
chr10	31446026	31446058
chr10	31607951	31608136
chr10	31608244	31610103
chr10	32889690	32890480
chr10	32890630	32890836
chr10	33623811	33624857
chr10	33950832	33951393
chr10	34018784	34019008
chr10	34019199	34019990
chr10	34206638	34207545
chr10	34207630	34207821
chr10	34281301	34283435
chr10	34296752	34297057
chr10	34297262	34298962
chr10	34299113	34299668
chr10	34300751	34300936
chr10	34301503	34301888
chr10	34316412	34317050
chr10	34317147	34317579
chr10	36506003	36506710
chr10	36506841	36507344
chr10	36973858	36975413
chr10	37136126	37138621
chr10	37139059	37139323
chr10	37139837	37140877
chr10	37141021	37141289
chr10	39133688	39133915
chr10	39165798	39166020
chr10	39170688	39171059
chr10	39171207	39172012
chr10	39172453	39172676
chr10	39173169	39173233
chr10	39369728	39370715
chr10	39379500	39379685
chr10	39471981	39472182
chr10	39730867	39731991
chr10	39732078	39733277
chr10	39733512	39733805
chr10	39898722	39899693
chr10	39959828	39960119
chr10	40024685	40025538
chr10	40246624	40247303
chr10	40247446	40247758
chr10	40257391	40258254
chr10	40258524	40258886
chr10	40300680	40301834
chr10	40302199	40302915
chr10	40348655	40350217
chr10	40683002	40683732
chr10	40882823	40884707
chr10	41071286	41071510
chr10	41288785	41288901
chr10	41302623	41303322
chr10	41303403	41304139
chr10	41449694	41450821
chr10	41490002	41490708
chr10	41518603	41520069
chr10	41678774	41678886
chr10	41809393	41810813
chr10	41887026	41888142
chr10	41934974	41934995
chr10	42018086	42018343
chr10	42018486	42018972
chr10	42275051	42278804
chr10	42477609	42478734
chr10	42501439	42503149
chr10	42579643	42579898
chr10	42582171	42582224
chr10	42583234	42584899
chr10	42678688	42679412
chr10	42761171	42762559
chr10	42860530	42860975
chr10	42861588	42861858
chr10	42863624	42864319
chr10	42864694	42864966
chr10	42958091	42958624
chr10	43021061	43021374
chr10	43021576	43022151
chr10	43155149	43155549
chr10	43173088	43173814
chr10	43173997	43175653
chr10	43220631	43221634
chr10	43221718	43222008
chr10	43478424	43478468
chr10	43478720	43478937
chr10	43479053	43480170
chr10	43540465	43541004
chr10	43578558	43578831
chr10	43579642	43579745
chr10	43901298	43902039
chr10	44268044	44268885
chr10	45066432	45067756
chr10	45485357	45485711
chr10	45485840	45486968
chr10	45577778	45578210
chr10	45578334	45578467
chr10	49782706	49783775
chr10	49788253	49789272
chr10	49790311	49790513
chr10	50592370	50593130
chr10	50893095	50893117
chr10	50894875	50895202
chr10	50895743	50895791
chr10	50896279	50896319
chr10	50900514	50901583
chr10	50902658	50903470
chr10	52233608	52234305
chr10	52381333	52382508
chr10	52417120	52418323
chr10	52690346	52691614
chr10	52704636	52704983
chr10	53379073	53380290
chr10	53503566	53503660
chr10	53596310	53596644
chr10	53596731	53597897
chr10	53629399	53630098
chr10	53750353	53751732
chr10	54074067	54074325
chr10	54074635	54076243
chr10	56115007	56116102
chr10	56228471	56229149
chr10	56378546	56379072
chr10	57486382	57487025
chr10	57532042	57532689
chr10	57632037	57632354
chr10	57794470	57795386
chr10	58255382	58255905
chr10	58322923	58324121
chr10	58446447	58447579
chr10	58497928	58498342
chr10	58801080	58801402
chr10	58812265	58813565
chr10	58813907	58814130
chr10	59220998	59223023
chr10	59322902	59324155
chr10	59539386	59539687
chr10	59615878	59616784
chr10	59702572	59703218
chr10	59879287	59880447
chr10	59898407	59898499
chr10	59900001	59900228
chr10	59920880	59921508
chr10	59942172	59942222
chr10	59942628	59943321
chr10	59950270	59952754
chr10	59969785	59970422
chr10	59974478	59974719
chr10	60002622	60003678
chr10	60081667	60081812
chr10	60105491	60106009
chr10	60106219	60107857
chr10	60108210	60108896
chr10	60109584	60109844
chr10	60115305	60115855
chr10	60116170	60116384
chr10	60218723	60219357
chr10	60277418	60278292
chr10	60279423	60279669
chr10	60284528	60284901
chr10	60285163	60286031
chr10	60346911	60347130
chr10	60752399	60753081
chr10	60826456	60826666
chr10	60830418	60831518
chr10	60893517	60893925
chr10	61089162	61089811
chr10	61146114	61148113
chr10	61382940	61383939
chr10	61452031	61452944
chr10	61475824	61476536
chr10	61625706	61626028
chr10	61648404	61649164
chr10	61680004	61680821
chr10	61695293	61696537
chr10	61782816	61784695
chr10	62101354	62101376
chr10	62102052	62102226
chr10	62109670	62109760
chr10	62110383	62111490
chr10	62230623	62230826
chr10	62338873	62339344
chr10	62339463	62341120
chr10	62449145	62450503
chr10	62485985	62486775
chr10	62577920	62578598
chr10	62590222	62590289
chr10	62601924	62602499
chr10	62650497	62651645
chr10	62725679	62726439
chr10	62726581	62726804
chr10	62791466	62793003
chr10	62863473	62863904
chr10	62865114	62866081
chr10	62866549	62867001
chr10	62919665	62919869
chr10	62919992	62921147
chr10	62946862	62947305
chr10	62979774	62980936
chr10	63022504	63025010
chr10	63025163	63025370
chr10	63100277	63100704
chr10	63243815	63244550
chr10	63338478	63338746
chr10	63338830	63339566
chr10	63382101	63382920
chr10	63386434	63387110
chr10	63429628	63430296
chr10	64083794	64084162
chr10	64086772	64087292
chr10	64087709	64088878
chr10	64090087	64090512
chr10	66921473	66921525
chr10	67003946	67004271
chr10	67096115	67096395
chr10	67096483	67096908
chr10	67097012	67097467
chr10	67126556	67127452
chr10	67185596	67186174
chr10	67284669	67285755
chr10	67536917	67536985
chr10	67537317	67537330
chr10	67537671	67537835
chr10	67547851	67549882
chr10	67911959	67912762
chr10	67979572	67979909
chr10	68136376	68136836
chr10	68276337	68277413
chr10	68279560	68280187
chr10	68282892	68283230
chr10	69212573	69213915
chr10	69533921	69535250
chr10	69535416	69535858
chr10	69690675	69690981
chr10	69706032	69707261
chr10	70096513	70097192
chr10	70097286	70098436
chr10	70245022	70245809
chr10	70292268	70292367
chr10	70440065	70441747
chr10	70520303	70521032
chr10	70598231	70600363
chr10	70950139	70950313
chr10	70952489	70952674
chr10	70952789	70952808
chr10	71159225	71159572
chr10	71237602	71238341
chr10	71284183	71285561
chr10	71344527	71345239
chr10	71347238	71348502
chr10	71857601	71857764
chr10	72654445	72655610
chr10	72655698	72656325
chr10	73096517	73097511
chr10	73097987	73098167
chr10	73099083	73100366
chr10	73821610	73822076
chr10	74966750	74968441
chr10	75036755	75037690
chr10	75060197	75060707
chr10	75060893	75062373
chr10	75211758	75212754
chr10	75516768	75517458
chr10	75517604	75518397
chr10	75558665	75558854
chr10	75559135	75559607
chr10	75559790	75560561
chr10	75666358	75668317
chr10	75763914	75764588
chr10	75772878	75773353
chr10	75834260	75834971
chr10	75837178	75837826
chr10	75859023	75860362
chr10	75872888	75873104
chr10	75920965	75922128
chr10	75932091	75932455
chr10	75936169	75936556
chr10	75937323	75937494
chr10	75950955	75951223
chr10	76032399	76033145
chr10	76237281	76238205
chr10	76344513	76345258
chr10	76345382	76345719
chr10	76442285	76442826
chr10	76468600	76469232
chr10	76531568	76531815
chr10	76961545	76961893
chr10	76962270	76962510
chr10	77021695	77021749
chr10	77032557	77033789
chr10	77258831	77259927
chr10	77417454	77418247
chr10	77515470	77516069
chr10	77581462	77582243
chr10	77605780	77607313
chr10	77621841	77622906
chr10	77902068	77902528
chr10	77903227	77903412
chr10	77969781	77970028
chr10	77978314	77979121
chr10	78009328	78010104
chr10	78159712	78160091
chr10	78169275	78170149
chr10	78184982	78185193
chr10	78243988	78244371
chr10	78244633	78245251
chr10	78351789	78352053
chr10	78352415	78352861
chr10	78396483	78396566
chr10	78412061	78413309
chr10	78425493	78426159
chr10	78463851	78465335
chr10	78481997	78482625
chr10	78574094	78575026
chr10	78746934	78747785
chr10	78752272	78753165
chr10	78779822	78780298
chr10	78780472	78780837
chr10	78787226	78787583
chr10	78787688	78788355
chr10	79097115	79097729
chr10	79533571	79533804
chr10	79554462	79554832
chr10	79554927	79555457
chr10	79613427	79614027
chr10	79637203	79638217
chr10	79638369	79638617
chr10	79638922	79639045
chr10	79668931	79670751
chr10	79681185	79681375
chr10	79681632	79681940
chr10	79682417	79682876
chr10	79683154	79683396
chr10	79704266	79704788
chr10	79704906	79705150
chr10	79716185	79716605
chr10	79716921	79717775
chr10	79746275	79746547
chr10	79754982	79755462
chr10	79766247	79767730
chr10	79767998	79768248
chr10	79768393	79768644
chr10	79780438	79780516
chr10	79793419	79794964
chr10	79802580	79802751
chr10	79803731	79804254
chr10	79852685	79853679
chr10	79853859	79855729
chr10	79855965	79856156
chr10	79873815	79874908
chr10	79908314	79908973
chr10	79909283	79909568
chr10	79916667	79917600
chr10	79925965	79926155
chr10	79926330	79928382
chr10	79960061	79960642
chr10	79983768	79984130
chr10	79984270	79986485
chr10	79996458	79996682
chr10	80039364	80039649
chr10	80040036	80040297
chr10	80053235	80054710
chr10	80102318	80102763
chr10	80115038	80115409
chr10	80115797	80116354
chr10	80116608	80117055
chr10	80136800	80138034
chr10	80138242	80139587
chr10	80141239	80141680
chr10	80141884	80143014
chr10	80147721	80148518
chr10	80148642	80150414
chr10	80150541	80151803
chr10	80159145	80159267
chr10	80159350	80159900
chr10	80160115	80160435
chr10	80164309	80165266
chr10	80167578	80168657
chr10	80172829	80173261
chr10	80179725	80180078
chr10	80190237	80191247
chr10	80226210	80227190
chr10	80249112	80249691
chr10	80259923	80260389
chr10	80260619	80262177
chr10	80264631	80265429
chr10	80292240	80293103
chr10	80293312	80293595
chr10	80295514	80296291
chr10	80296504	80297069
chr10	80298958	80299979
chr10	80300083	80300403
chr10	80301095	80301487
chr10	80320173	80320530
chr10	80322888	80323184
chr10	80323426	80323899
chr10	80356538	80356880
chr10	80386549	80387303
chr10	80387743	80388077
chr10	80398546	80400041
chr10	80406269	80406925
chr10	80432920	80434097
chr10	80475336	80475734
chr10	80561067	80561999
chr10	80566610	80566760
chr10	80576309	80578117
chr10	80578246	80578785
chr10	80589767	80590122
chr10	80602668	80603340
chr10	80604077	80604262
chr10	80621973	80622511
chr10	80622914	80623560
chr10	80655980	80656303
chr10	80656510	80656997
chr10	80674132	80674317
chr10	80675196	80676190
chr10	80676595	80677320
chr10	80677795	80678071
chr10	80701579	80703296
chr10	80741344	80742376
chr10	80754889	80755815
chr10	80755995	80756307
chr10	80797567	80799409
chr10	80806418	80806562
chr10	80806983	80807661
chr10	80825979	80826369
chr10	80826598	80827041
chr10	80827547	80827765
chr10	80843573	80843835
chr10	80844035	80844559
chr10	80854556	80854801
chr10	80854881	80856090
chr10	80897747	80898046
chr10	80900069	80901179
chr10	80917524	80918418
chr10	80928618	80929673
chr10	80930108	80930333
chr10	80985719	80985913
chr10	80995225	80995291
chr10	80999584	81000060
chr10	81000937	81001424
chr10	81014773	81014888
chr10	81015234	81015349
chr10	81021988	81022184
chr10	81024901	81025413
chr10	81036937	81037345
chr10	81059831	81060083
chr10	81070134	81070343
chr10	81105217	81106687
chr10	81129049	81129971
chr10	81135350	81137186
chr10	81137275	81137625
chr10	81137738	81138627
chr10	81167569	81168155
chr10	81168715	81169234
chr10	81173049	81173476
chr10	81174791	81174991
chr10	81176393	81177470
chr10	81182850	81183294
chr10	81192443	81192974
chr10	81193057	81193567
chr10	81230131	81230396
chr10	81230495	81230836
chr10	81231205	81231431
chr10	81232913	81233558
chr10	81234022	81234148
chr10	81252528	81252730
chr10	81252846	81253168
chr10	81257211	81258112
chr10	81266456	81267023
chr10	81268166	81268471
chr10	81292903	81293523
chr10	81319469	81319544
chr10	81320447	81321668
chr10	81350048	81350326
chr10	81350632	81350921
chr10	81357563	81358109
chr10	81377930	81378126
chr10	81378207	81378491
chr10	81378816	81378869
chr10	81384195	81385041
chr10	81407411	81407824
chr10	81413660	81414190
chr10	81414273	81414537
chr10	81416765	81417122
chr10	81425449	81425798
chr10	81426038	81427190
chr10	81429745	81431720
chr10	81432619	81433307
chr10	81481521	81481938
chr10	81482096	81482998
chr10	81484725	81484900
chr10	81495832	81496908
chr10	81544211	81545029
chr10	81545415	81545788
chr10	81559088	81560019
chr10	81560160	81560803
chr10	81564274	81564329
chr10	81570759	81571628
chr10	81575196	81575439
chr10	81604889	81605308
chr10	81605461	81606126
chr10	81606314	81606947
chr10	81627152	81627772
chr10	81633138	81633437
chr10	81633591	81633893
chr10	81642195	81642339
chr10	81642933	81644020
chr10	81648874	81649779
chr10	81997275	81997500
chr10	82047831	82048697
chr10	82083088	82083957
chr10	82127815	82128348
chr10	82178069	82178950
chr10	82240741	82241540
chr10	82354118	82354819
chr10	82622548	82623212
chr10	82623323	82623541
chr10	82629337	82630259
chr10	82698553	82699728
chr10	82762922	82763625
chr10	82858928	82859542
chr10	82860276	82860850
chr10	82984828	82986742
chr10	83049063	83049103
chr10	83102950	83103028
chr10	83337021	83337476
chr10	83337586	83338004
chr10	83359864	83360786
chr10	83533513	83534080
chr10	83543473	83544373
chr10	83648368	83648953
chr10	83722884	83723039
chr10	83723143	83723478
chr10	84437542	84437694
chr10	84438094	84438358
chr10	84439968	84441727
chr10	84533180	84533743
chr10	84576175	84577681
chr10	84622209	84622785
chr10	84754706	84755840
chr10	84756158	84756398
chr10	84756649	84757091
chr10	84760078	84760327
chr10	84917047	84918424
chr10	85102162	85103621
chr10	85127933	85128039
chr10	85184054	85185699
chr10	85221098	85221701
chr10	85221836	85221938
chr10	85386376	85387422
chr10	85387523	85388584
chr10	85598344	85598890
chr10	85624681	85625178
chr10	85829063	85829913
chr10	85871773	85872332
chr10	85916372	85916989
chr10	85917237	85917242
chr10	85928804	85928955
chr10	85956972	85957948
chr10	86021627	86022670
chr10	86300485	86301095
chr10	86302806	86303146
chr10	86491499	86491875
chr10	86497581	86499024
chr10	86685197	86686101
chr10	86704693	86706757
chr10	86778260	86778825
chr10	86778919	86779985
chr10	87057963	87058576
chr10	87485687	87485892
chr10	87486153	87486590
chr10	87492484	87493687
chr10	88146977	88147124
chr10	88201002	88201416
chr10	88357034	88357091
chr10	88378894	88380275
chr10	88503146	88503861
chr10	88730447	88731968
chr10	88826394	88826957
chr10	89256653	89257129
chr10	89685633	89686361
chr10	89731748	89732271
chr10	89744847	89745945
chr10	89873053	89874166
chr10	90432580	90432810
chr10	90576459	90576994
chr10	90577223	90578292
chr10	90728387	90728613
chr10	90728772	90729006
chr10	90828779	90829334
chr10	90829426	90829702
chr10	90830235	90830648
chr10	90831160	90831433
chr10	91082292	91082798
chr10	91083046	91083459
chr10	91123164	91124177
chr10	91170745	91172064
chr10	91181436	91182270
chr10	91187864	91188225
chr10	92162252	92163268
chr10	92722035	92722894
chr10	93081317	93081656
chr10	93160663	93162284
chr10	93275255	93275473
chr10	93275591	93276804
chr10	93310096	93310547
chr10	93430911	93431163
chr10	93432551	93432903
chr10	93452964	93453882
chr10	93588985	93589781
chr10	93594038	93594584
chr10	93640901	93642064
chr10	93888796	93889921
chr10	94035028	94036582
chr10	94147524	94148456
chr10	94198828	94199575
chr10	94230343	94230481
chr10	94230601	94230944
chr10	94249703	94250053
chr10	94311936	94312490
chr10	94312580	94312765
chr10	94408742	94409219
chr10	94415928	94416295
chr10	94428165	94428301
chr10	94514622	94515755
chr10	94545623	94545906
chr10	94687849	94689215
chr10	94905628	94905945
chr10	94942539	94943012
chr10	94943250	94945761
chr10	95323437	95324265
chr10	95415691	95416238
chr10	95416409	95416608
chr10	95416928	95417546
chr10	95501366	95502062
chr10	95514574	95516008
chr10	95563204	95564299
chr10	95894247	95894876
chr10	95940471	95941467
chr10	96616314	96618271
chr10	96621036	96621221
chr10	96751731	96751917
chr10	97313084	97314076
chr10	98913802	98914214
chr10	98914292	98915950
chr10	98916128	98916399
chr10	99106756	99108367
chr10	99261182	99262396
chr10	99262501	99264864
chr10	99599624	99599913
chr10	100015829	100016325
chr10	100486674	100487300
chr10	100487560	100487863
chr10	100588923	100589465
chr10	102158772	102159032
chr10	103367433	103369148
chr10	105573385	105574182
chr10	105574297	105574490
chr10	105574627	105575648
chr10	105841095	105841907
chr10	106469051	106469391
chr10	106469521	106469737
chr10	106469943	106470582
chr10	107271446	107271799
chr10	107271877	107273024
chr10	108161337	108163169
chr10	108446371	108446556
chr10	109009795	109010148
chr10	109010421	109011018
chr10	109011350	109011769
chr10	109664835	109664847
chr10	109684601	109684817
chr10	109831919	109832486
chr10	109832756	109833348
chr10	110233606	110233832
chr10	110454942	110456302
chr10	110745115	110745294
chr10	110919857	110920454
chr10	110931749	110932164
chr10	111009241	111010690
chr10	111010845	111011324
chr10	111108788	111108998
chr10	111164306	111165816
chr10	111298310	111299216
chr10	111419663	111420035
chr10	111472722	111474096
chr10	111506083	111507337
chr10	111507620	111508203
chr10	111972710	111973235
chr10	112160052	112160409
chr10	112270054	112271123
chr10	112271411	112272334
chr10	112928367	112929274
[truncated: 19,163 more rows]

## Sheet: ZFHX3+H3K27AC
chr	start	end
chr1	13188408	13188700
chr1	13561544	13561586
chr1	23359587	23359705
chr1	24218878	24219070
chr1	24677668	24677669
chr1	25033794	25033927
chr1	25180295	25180527
chr1	33174679	33174858
chr1	34696534	34696754
chr1	34793304	34793693
chr1	36547341	36547778
chr1	36635069	36635076
chr1	37219540	37219549
chr1	37219754	37219936
chr1	37698464	37698679
chr1	37742964	37743055
chr1	38198519	38198684
chr1	38200444	38200633
chr1	38893139	38893345
chr1	43006649	43006722
chr1	51334405	51334690
chr1	52648771	52648907
chr1	54898690	54899023
chr1	60793807	60793815
chr1	61298224	61298478
chr1	62743369	62743573
chr1	62783436	62783499
chr1	63204159	63204661
chr1	63248072	63248096
chr1	63253059	63253298
chr1	63255578	63255846
chr1	63256675	63257272
chr1	63257518	63257570
chr1	63266244	63266519
chr1	63272510	63272584
chr1	63368054	63368339
chr1	64059871	64060288
chr1	64338104	64338172
chr1	66988190	66988305
chr1	72002487	72002628
chr1	72878163	72878196
chr1	73826353	73826438
chr1	73902588	73902723
chr1	74027659	74027701
chr1	74806344	74806525
chr1	75244812	75244895
chr1	75246021	75246240
chr1	75560004	75560108
chr1	77545904	77546092
chr1	77708617	77708776
chr1	78725903	78726210
chr1	78745338	78745669
chr1	80630538	80630982
chr1	83277182	83277367
chr1	84585324	84585706
chr1	84623015	84623243
chr1	85853815	85854251
chr1	85916794	85917310
chr1	85922091	85922354
chr1	85934018	85934052
chr1	86059669	86060056
chr1	86435810	86435831
chr1	86439943	86440192
chr1	86501928	86502042
chr1	86507495	86507680
chr1	86532188	86532399
chr1	87164594	87164640
chr1	88705713	88705818
chr1	88706703	88706707
chr1	88708855	88709049
chr1	89550424	89550507
chr1	89599492	89599690
chr1	89750862	89750964
chr1	89849041	89849318
chr1	90222288	90222330
chr1	90973526	90973573
chr1	90974943	90974951
chr1	92030651	92030912
chr1	92437804	92438160
chr1	98280764	98280838
chr1	118435009	118435088
chr1	120115924	120116123
chr1	125840140	125840490
chr1	126688631	126688865
chr1	127603830	127604218
chr1	127661147	127661342
chr1	129324472	129324672
chr1	132121437	132121488
chr1	132157862	132158073
chr1	132208206	132208395
chr1	132209437	132209652
chr1	132355841	132355856
chr1	132367617	132367867
chr1	132505111	132505393
chr1	132525954	132526086
chr1	132538968	132539060
chr1	132641460	132641901
chr1	132655019	132655336
chr1	132660251	132660521
chr1	132696234	132696576
chr1	132759426	132759652
chr1	132782218	132782501
chr1	132879678	132879701
chr1	133492088	133492304
chr1	134182282	134182289
chr1	134846449	134847175
chr1	134847712	134847928
chr1	134995676	134995714
chr1	135369270	135369374
chr1	135540325	135540428
chr1	135545006	135545167
chr1	135659445	135659685
chr1	135670581	135670910
chr1	135781294	135781372
chr1	136089602	136089787
chr1	136174932	136175307
chr1	152525417	152525612
chr1	153737492	153737677
chr1	154102764	154102883
chr1	154103076	154103180
chr1	154103345	154103632
chr1	154150122	154150518
chr1	154156526	154156820
chr1	154500565	154500750
chr1	154661582	154661787
chr1	154704637	154705006
chr1	155086657	155086904
chr1	155234342	155234449
chr1	155235985	155236172
chr1	155307516	155307741
chr1	155529244	155529294
chr1	158489518	158490022
chr1	159854253	159854486
chr1	164459280	164459382
chr1	164461703	164461828
chr1	165017796	165017981
chr1	165042347	165042699
chr1	165046682	165046873
chr1	165075341	165076227
chr1	165102907	165103144
chr1	165105044	165105092
chr1	165610854	165610950
chr1	166344390	166344647
chr1	167645025	167645042
chr1	168355402	168355628
chr1	168356855	168356968
chr1	168358533	168358621
chr1	170383546	170383821
chr1	170392942	170393168
chr1	172307995	172308301
chr1	172309616	172309809
chr1	172310275	172310406
chr1	172310914	172311071
chr1	172319392	172319527
chr1	172324559	172324939
chr1	174536917	174537020
chr1	175385692	175385834
chr1	179060119	179060305
chr1	180407266	180407750
chr1	180422792	180422996
chr1	182114880	182114888
chr1	182124539	182124588
chr1	182489743	182489950
chr1	182574155	182574447
chr1	182663750	182663949
chr1	182792808	182793062
chr1	182960413	182960495
chr1	185185594	185185741
chr1	185210068	185210228
chr1	185253273	185253527
chr1	190868956	190869225
chr1	191318948	191318953
chr1	191435538	191435559
chr1	191470506	191470877
chr1	191817922	191818006
chr1	191818216	191818308
chr1	192312622	192312755
chr1	193086966	193087460
chr1	193568827	193569024
chr10	5289457	5289648
chr10	6035993	6036079
chr10	8928951	8929252
chr10	12019408	12019633
chr10	18526599	18526844
chr10	20474795	20475414
chr10	20937336	20937632
chr10	25272527	25272714
chr10	25571499	25571545
chr10	26327776	26328121
chr10	34317579	34317684
chr10	39169960	39170688
chr10	39173233	39173392
chr10	39541069	39541701
chr10	39551801	39552029
chr10	39552221	39552691
chr10	39557959	39558186
chr10	39631615	39631836
chr10	40517339	40517571
chr10	40521620	40521891
chr10	42579898	42580001
chr10	43106355	43106579
chr10	43439489	43439739
chr10	43440241	43440474
chr10	43527825	43528069
chr10	43739668	43739968
chr10	43740288	43740687
chr10	50892825	50893095
chr10	50902117	50902381
chr10	50904254	50904851
chr10	50905007	50905148
chr10	53348612	53348700
chr10	53503365	53503566
chr10	59090693	59090885
chr10	59893209	59893232
chr10	59895022	59895363
chr10	59898216	59898407
chr10	59898499	59898777
chr10	59899498	59900001
chr10	59900903	59901110
chr10	59942026	59942172
chr10	59974150	59974478
chr10	59974719	59974729
chr10	60027626	60027814
chr10	60033078	60033377
chr10	60080910	60081129
chr10	60081412	60081667
chr10	60081911	60082296
chr10	61662668	61662683
chr10	62099296	62099504
chr10	62101376	62101645
chr10	62102226	62102505
chr10	62182891	62182927
chr10	62294106	62294291
chr10	62847324	62847571
chr10	63382920	63382942
chr10	63880435	63880915
chr10	63954521	63954706
chr10	69579512	69579804
chr10	69644227	69644295
chr10	69793091	69793141
chr10	70159518	70159705
chr10	70292117	70292268
chr10	70506816	70507093
chr10	70789219	70789437
chr10	70860837	70861421
chr10	70950313	70950324
chr10	70952808	70952985
chr10	71041975	71042160
chr10	71857764	71857825
chr10	74990598	74991015
chr10	75135817	75135872
chr10	75151336	75151389
chr10	75170643	75170865
chr10	75556268	75556503
chr10	75704385	75704597
chr10	75860871	75860963
chr10	76883596	76883956
chr10	77151217	77151225
chr10	78160091	78160113
chr10	78234971	78235239
chr10	78388411	78388689
chr10	78396283	78396483
chr10	78458006	78458191
chr10	79802751	79802924
chr10	79806202	79806215
chr10	79900949	79901383
chr10	80130995	80132255
chr10	80147718	80147721
chr10	80159044	80159145
chr10	80164283	80164309
chr10	80165266	80165322
chr10	80574321	80574437
chr10	80678071	80678101
chr10	80678337	80678627
chr10	80757781	80757802
chr10	80774473	80774734
chr10	80928596	80928618
chr10	80995291	80995351
chr10	80999548	80999584
chr10	81000060	81000198
chr10	81001424	81001486
chr10	81021776	81021988
chr10	81129971	81129983
chr10	81303457	81303465
chr10	81407282	81407411
chr10	81409090	81409119
chr10	81413516	81413660
chr10	81470657	81470852
chr10	81484091	81484725
chr10	81551465	81552000
chr10	81564159	81564274
chr10	81604835	81604889
chr10	83103028	83103289
chr10	83106246	83106588
chr10	83107870	83108090
chr10	83182310	83182989
chr10	84386279	84386449
chr10	84388412	84388719
chr10	85221037	85221098
chr10	85221938	85222173
chr10	86296152	86296308
chr10	86872500	86872695
chr10	87552973	87553120
chr10	90723747	90724103
chr10	94230168	94230343
chr10	94249608	94249703
chr10	94250053	94250247
chr10	94378471	94378852
chr10	94414197	94414887
chr10	94428018	94428165
chr10	94585156	94585260
chr10	94919602	94919716
chr10	94926831	94927080
chr10	97159459	97159649
chr10	97160180	97160425
chr10	108679639	108679754
chr10	108680041	108680111
chr10	109664635	109664835
chr10	110233832	110234074
chr10	111419630	111419663
chr10	111566927	111567140
chr10	112160409	112160488
chr10	115013552	115013840
chr10	116196523	116196693
chr10	116196992	116197071
chr10	117716678	117716992
chr10	118121827	118122236
chr10	119762086	119762258
chr10	120428642	120428646
chr10	121291349	121291416
chr10	122717935	122718205
chr10	122887623	122887843
chr10	126809555	126809596
chr10	126962308	126962609
chr10	126990438	126990728
chr10	127061013	127061118
chr10	127312533	127312543
chr10	127510026	127510769
chr10	127510863	127510989
chr10	127675067	127675194
chr11	3337812	3338044
chr11	3387122	3387404
chr11	3983060	3983170
chr11	4134649	4134675
chr11	4803137	4803348
chr11	5887000	5887244
chr11	6001075	6001477
chr11	6120779	6120971
chr11	6406298	6406601
chr11	6602722	6602726
chr11	8424435	8424444
chr11	11844319	11844391
chr11	11844646	11844868
chr11	12351292	12351523
chr11	12351756	12351941
chr11	12373823	12374056
chr11	20477405	20477479
chr11	20987354	20987487
chr11	22617751	22617808
chr11	22698828	22699039
chr11	25855940	25856108
chr11	28422710	28422895
chr11	29788858	29788987
chr11	29789020	29789134
chr11	31713790	31713983
chr11	31759733	31760386
chr11	31768154	31768361
chr11	31770878	31771140
chr11	31822063	31822286
chr11	31839250	31839504
chr11	32018326	32018492
chr11	32020893	32021087
chr11	32040289	32040482
chr11	32063841	32064063
chr11	32087483	32087674
chr11	32106395	32106534
chr11	32107832	32107922
chr11	32113170	32113484
chr11	32113788	32113987
chr11	32161613	32161625
chr11	33004840	33005025
chr11	33163947	33163979
chr11	33741839	33742640
chr11	33744558	33744813
chr11	33781742	33781970
chr11	35856924	35857109
chr11	35865107	35865314
chr11	35999935	36000127
chr11	36046226	36046245
chr11	36080663	36080844
chr11	36106917	36107173
chr11	36109362	36109804
chr11	40863020	40863247
chr11	40863375	40863560
chr11	43667409	43667535
chr11	46215629	46215870
chr11	46218332	46219174
chr11	49918801	49919157
chr11	49927334	49927513
chr11	50174216	50174217
chr11	50403701	50403754
chr11	50488188	50488205
chr11	51945344	51945568
chr11	51945767	51945927
chr11	51967402	51967487
chr11	52254283	52254313
chr11	52641865	52642190
chr11	53252436	53252638
chr11	53301608	53301643
chr11	53467066	53467088
chr11	54002347	54002551
chr11	54112575	54112778
chr11	54113363	54113393
chr11	54904290	54904507
chr11	56247057	56247329
chr11	56374415	56374582
chr11	57506612	57506691
chr11	57760556	57761072
chr11	57787339	57787697
chr11	59182646	59182861
chr11	59708003	59708148
chr11	59891972	59892157
chr11	59900072	59900356
chr11	59933839	59934255
chr11	60178034	60178199
chr11	60186580	60186829
chr11	60200067	60200203
chr11	60222031	60222211
chr11	60301873	60302236
chr11	60311611	60311971
chr11	60384848	60385107
chr11	60385481	60385495
chr11	60703134	60703369
chr11	62024302	62024335
chr11	65124616	65124820
chr11	67010598	67010641
chr11	67526853	67527344
chr11	67571743	67571790
chr11	67588566	67589206
chr11	68145227	68145402
chr11	69073842	69073893
chr11	69093047	69093059
chr11	69094732	69095075
chr11	69397642	69397836
chr11	69398194	69398214
chr11	69682745	69682764
chr11	69682920	69682997
chr11	71435664	71435865
chr11	71436371	71436638
chr11	71440066	71440079
chr11	71758628	71758834
chr11	71996908	71997093
chr11	72086747	72086993
chr11	72103522	72103779
chr11	72130221	72130248
chr11	72342880	72342906
chr11	72455757	72456013
chr11	74554663	74554913
chr11	74556118	74556309
chr11	74751611	74751771
chr11	74848084	74848090
chr11	74871211	74871509
chr11	75015710	75015957
chr11	75273818	75273839
chr11	75281660	75281874
chr11	75402224	75402416
chr11	75573425	75573466
chr11	76148110	76148368
chr11	76477080	76477273
chr11	76509282	76509784
chr11	76530277	76530491
chr11	77501476	77501544
chr11	77807818	77808150
chr11	77850980	77851176
chr11	77876661	77877029
chr11	77893791	77894183
chr11	77897413	77897711
chr11	77965248	77965532
chr11	77965767	77966008
chr11	78152636	78152902
chr11	78886713	78886891
chr11	79224829	79225147
chr11	79577833	79577872
chr11	79590410	79590425
chr11	80289538	80289584
chr11	80474082	80474507
chr11	80484009	80484093
chr11	80485035	80485368
chr11	80504132	80504351
chr11	80508634	80508832
chr11	80509379	80509678
chr11	80518425	80518901
chr11	80519233	80519333
chr11	80577879	80578303
chr11	80670571	80670745
chr11	81588869	81589065
chr11	82392503	82392717
chr11	83441389	83441426
chr11	84043584	84043775
chr11	84519266	84519436
chr11	84519574	84519609
chr11	86920497	86920977
chr11	86930995	86931180
chr11	86995651	86995859
chr11	87423151	87423280
chr11	87443023	87443176
chr11	87448487	87448897
chr11	87462078	87462185
chr11	87462464	87462556
chr11	87471262	87471331
chr11	87797447	87797593
chr11	88117900	88118292
chr11	88118849	88119072
chr11	88119320	88119595
chr11	88149212	88149465
chr11	88216894	88216949
chr11	88252434	88252561
chr11	88252926	88253114
chr11	88356759	88356983
chr11	88404493	88404935
chr11	88405535	88405770
chr11	88443865	88444330
chr11	88471742	88471927
chr11	88551015	88551204
chr11	88552968	88553291
chr11	88572914	88573044
chr11	88583584	88583840
chr11	88585249	88585523
chr11	88654808	88655372
chr11	88728450	88728532
chr11	90484855	90484926
chr11	90548765	90548978
chr11	94236230	94236570
chr11	94265926	94265956
chr11	94549609	94549680
chr11	95001050	95001225
chr11	95042422	95042511
chr11	95712246	95712263
chr11	96076719	96076724
chr11	96462273	96462804
chr11	96860976	96861109
chr11	96872603	96872795
chr11	96875396	96875482
chr11	96876782	96876980
chr11	97152844	97152901
chr11	97401180	97401538
chr11	97403928	97403994
chr11	97531698	97531795
chr11	97543213	97543398
chr11	97570921	97570947
chr11	97813809	97814019
chr11	97900112	97900143
chr11	97987151	97987343
chr11	98019309	98019327
chr11	98284797	98285077
chr11	98739949	98739997
chr11	98754876	98755133
chr11	98776211	98776417
chr11	98781701	98781716
chr11	98781988	98782005
chr11	98786957	98787172
chr11	100332913	100333295
chr11	100362727	100363085
chr11	101146503	101146713
chr11	101190657	101190931
chr11	101641728	101641823
chr11	101645544	101645926
chr11	101658262	101658778
chr11	101658863	101659241
chr11	102399411	102399725
chr11	102739858	102739881
chr11	103003182	103003506
chr11	103200172	103200239
chr11	103246271	103246610
chr11	103884797	103884987
chr11	104278383	104278633
chr11	104289649	104289958
chr11	105508243	105508293
chr11	106675256	106675475
chr11	106736707	106736918
chr11	106737346	106737578
chr11	107356793	107357072
chr11	108151563	108151802
chr11	108259473	108259676
chr11	108858069	108858498
chr11	109244725	109244766
chr11	109245066	109245092
chr11	109860728	109860763
chr11	112780735	112780978
chr11	113221768	113221998
chr11	113520935	113521122
chr11	113797334	113797599
chr11	113931900	113932182
chr11	114198734	114198977
chr11	114553996	114554283
chr11	114684802	114684921
chr11	115474082	115474154
chr11	115674585	115674635
chr11	115775819	115775836
chr11	115776472	115776555
chr11	115779957	115780100
chr11	115950053	115950238
chr11	116586939	116587015
chr11	116643945	116644154
chr11	116661792	116662035
chr11	116663007	116663034
chr11	117018453	117018584
chr11	117081222	117081914
chr11	117123010	117123199
chr11	117409057	117409065
chr11	117523388	117523618
chr11	117526032	117526236
chr11	117541248	117541556
chr11	117541662	117541875
chr11	117870490	117870941
chr11	118133366	118133723
chr11	118327670	118327896
chr11	118402020	118402461
chr11	118423317	118423494
chr11	118739105	118739145
chr11	118773202	118773429
chr11	118793938	118794257
chr11	118794548	118794843
chr11	118814835	118815216
chr11	118905634	118905848
chr11	118998864	118998896
chr11	119126635	119126820
chr11	119215106	119215108
chr11	119862857	119863062
chr11	119989569	119989754
chr11	120012539	120012615
chr11	120018676	120018957
chr11	120022788	120023064
chr11	120028298	120028477
chr11	120029700	120029890
chr11	120102263	120102417
chr11	120226908	120227109
chr11	120261391	120261587
chr12	3390872	3390880
chr12	3548718	3548829
chr12	3781390	3781827
chr12	3818334	3818407
chr12	3834962	3834982
chr12	3871778	3872014
chr12	3879910	3880121
chr12	3887041	3887126
chr12	3887617	3887827
chr12	4080575	4080662
chr12	4132607	4132820
chr12	4524043	4524236
chr12	5208780	5208944
chr12	5213216	5213405
chr12	5213629	5214030
chr12	5216313	5216673
chr12	5268308	5268493
chr12	5359326	5359518
chr12	8326883	8327058
chr12	8332425	8332610
chr12	11221652	11221875
chr12	12023822	12023965
chr12	12323686	12323715
chr12	12591007	12591377
chr12	12904188	12904309
chr12	12905059	12905104
chr12	13024067	13024361
chr12	16261105	16261290
chr12	16533335	16533483
chr12	16551210	16551787
chr12	16856108	16856302
chr12	17241456	17241617
chr12	17241904	17242157
chr12	17556597	17556710
chr12	17557436	17558265
chr12	21132300	21132378
chr12	21443913	21444223
chr12	21505703	21505896
chr12	21510968	21511188
chr12	24642028	24642220
chr12	24642439	24642624
chr12	24710541	24710758
chr12	24894047	24894232
chr12	24928136	24928500
chr12	25097409	25097595
chr12	25101224	25101262
chr12	26351528	26351713
chr12	26370109	26370308
chr12	26621308	26621410
chr12	27061586	27061626
chr12	27065052	27065237
chr12	27248644	27248788
chr12	28699666	28699810
chr12	28700137	28700567
chr12	28700712	28700991
chr12	28701452	28701674
chr12	28704481	28704881
chr12	28816802	28816987
chr12	28817102	28817222
chr12	28817546	28817747
chr12	28859590	28859824
chr12	28865930	28866189
chr12	28948820	28949353
chr12	29247430	29247620
chr12	29257891	29258147
chr12	29279639	29280717
chr12	29290374	29290483
chr12	29628409	29628520
chr12	29629606	29630512
chr12	29655128	29655479
chr12	29664738	29664859
chr12	29665033	29665052
chr12	29665521	29665828
chr12	29675805	29676318
chr12	29698158	29698441
chr12	29699165	29699456
chr12	29740455	29740806
chr12	29822187	29822420
chr12	29872263	29872821
chr12	29882896	29883272
chr12	29883391	29883765
chr12	33061495	33062109
chr12	36380783	36380935
chr12	40746537	40746756
chr12	45670666	45670783
chr12	46075730	46076011
chr12	51000809	51001007
chr12	51865748	51866229
chr12	52448258	52448355
chr12	52774484	52774674
chr12	55446820	55447032
chr12	55465648	55465931
chr12	56275754	56275776
chr12	67011354	67011579
chr12	68996855	68996982
chr12	69537928	69538101
chr12	69843871	69844094
chr12	70680142	70680234
chr12	72357592	72357777
chr12	72938018	72938031
chr12	72938689	72938718
chr12	72944891	72944996
chr12	74013725	74013889
chr12	74075188	74075501
chr12	74075655	74075843
chr12	74098815	74099009
chr12	74105959	74106144
chr12	74131688	74131996
chr12	74230739	74230829
chr12	74231055	74231508
chr12	77780823	77780975
chr12	77781477	77781676
chr12	79511735	79512056
chr12	79910963	79911148
chr12	79925578	79925846
chr12	80132957	80133046
chr12	80545315	80545561
chr12	80567312	80567572
chr12	81199844	81199876
chr12	82072897	82073312
chr12	82093715	82093947
chr12	82416190	82416208
chr12	83302273	83302526
chr12	83302929	83303113
chr12	84752079	84752463
chr12	85436383	85436607
chr12	85869591	85869825
chr12	86768946	86769050
chr12	86772032	86772143
chr12	86795809	86796467
chr12	86798860	86799002
chr12	86801809	86802146
chr12	86805832	86806255
chr12	86806554	86806615
chr12	86810802	86811095
chr12	86815884	86816901
chr12	86817039	86817083
chr12	86817442	86817694
chr12	86824949	86825152
chr12	86849859	86849992
chr12	86850353	86850561
chr12	86879100	86879159
chr12	86887941	86888040
chr12	86890815	86891213
chr12	86897840	86897930
chr12	86918148	86918309
chr12	86923781	86924402
chr12	86942286	86942511
chr12	86974253	86974333
chr12	86983492	86983737
chr12	87045410	87045624
chr12	87107428	87107896
chr12	88442391	88442611
chr12	89106585	89106605
chr12	89129117	89129341
chr12	89129614	89129897
chr12	91679689	91679887
chr12	92738059	92738404
chr12	98674707	98674756
chr12	98991999	98992224
chr12	98996583	98996768
chr12	99084438	99084589
chr12	99087572	99087941
chr12	99340881	99341064
chr12	99918030	99918286
chr12	99923046	99923345
chr12	100222680	100222803
chr12	100226586	100226783
chr12	100228125	100228449
chr12	100243099	100243397
chr12	100244712	100244925
chr12	100265429	100265676
chr12	100266030	100266336
chr12	100311068	100311381
chr12	100314399	100314657
chr12	100315209	100315574
chr12	100392185	100392583
chr12	100398768	100399031
chr12	100841075	100841231
chr12	100957786	100958229
chr12	100986517	100986841
chr12	103059164	103059444
chr12	103059556	103059857
chr12	103062043	103062228
chr12	103144411	103144569
chr12	103425942	103426250
chr12	103514057	103514242
chr12	103514506	103514702
chr12	104922670	104922855
chr12	104924045	104924238
chr12	105092841	105093212
chr12	105109703	105109761
chr12	105473635	105473820
chr12	105475310	105475437
chr12	105917549	105917813
chr12	108231175	108231446
chr12	108240929	108241190
chr12	108904105	108904263
chr12	108915377	108915600
chr12	109010347	109010619
chr12	109393816	109394218
chr12	109555057	109555265
chr12	109614884	109615205
chr12	109750123	109750225
chr12	110373684	110373854
chr12	110374583	110374865
chr12	110375331	110375501
chr12	110377284	110377571
chr12	110598974	110599166
chr12	111134742	111134927
chr12	111353297	111353589
chr12	111401754	111401819
chr12	111505142	111505162
chr12	111668493	111668544
chr12	111687417	111687682
chr12	111687837	111687880
chr12	111693506	111693853
chr12	111694101	111694163
chr12	111695921	111696614
chr12	111718797	111718933
chr12	111725964	111726183
chr12	111732608	111732996
chr12	111967129	111967196
chr12	112170893	112171114
chr12	112329792	112329808
chr12	112330648	112330893
chr12	112498852	112499033
chr12	112543205	112543266
chr12	112543475	112543545
chr12	112551409	112552797
chr12	112552909	112553306
chr12	112605849	112606170
chr12	112623717	112623718
chr12	112746920	112747027
chr12	113012839	113013179
chr12	113041882	113041918
chr12	113139185	113139373
chr12	113146249	113146288
chr12	116576688	116577011
chr12	116577986	116578112
chr12	116585094	116585430
chr12	116660334	116660523
chr12	116677816	116678118
chr12	116709374	116710164
chr12	116842798	116843276
chr12	117152470	117152633
chr12	117169630	117169825
chr12	117172559	117172744
chr12	117173103	117173288
chr12	117174236	117174842
chr12	117176220	117176555
chr12	117192041	117192354
chr12	117199495	117199766
chr12	117255426	117255611
chr12	117257187	117257503
chr12	117257891	117258076
chr12	117344651	117344917
chr12	117345987	117346021
chr12	117751657	117751975
chr13	12540281	12540412
chr13	18743765	18743857
chr13	24520940	24521191
chr13	24522158	24522426
chr13	24686810	24686894
chr13	25362354	25362497
chr13	25403294	25403666
chr13	26464571	26464616
chr13	30085330	30085346
chr13	34088253	34088524
chr13	34096416	34096526
chr13	34134370	34134616
chr13	34408406	34408591
chr13	36282338	36282351
chr13	36282957	36283118
chr13	36551229	36551468
chr13	36562469	36562724
chr13	36725022	36725385
chr13	36727709	36727815
chr13	36736773	36736816
chr13	37453157	37453467
chr13	42159168	42159282
chr13	42820600	42820900
chr13	42822434	42822612
chr13	43182522	43182702
chr13	43230068	43230364
chr13	45538275	45538521
chr13	45572042	45572276
chr13	45582740	45582781
chr13	46350127	46350374
chr13	46819547	46819604
chr13	47667488	47667718
chr13	49015504	49015618
chr13	49129120	49129328
chr13	49213478	49213839
chr13	49381198	49381507
chr13	49449545	49449852
chr13	51469494	51469751
chr13	51574307	51574431
chr13	51706089	51706424
chr13	51806072	51806256
chr13	51806644	51806765
chr13	51853505	51853719
chr13	51903015	51903035
chr13	52470108	52470222
chr13	54282499	54282804
chr13	54374240	54374607
chr13	54752767	54752954
chr13	54759791	54759865
chr13	54886957	54887118
chr13	55178190	55178290
chr13	55742525	55742584
chr13	56103892	56104138
chr13	56109144	56109390
chr13	56222382	56222383
chr13	56766226	56766473
chr13	56774104	56774298
chr13	56806620	56806642
chr13	57017688	57018009
chr13	57596113	57596420
chr13	58067980	58068059
chr13	58543228	58543525
chr13	58946163	58946456
chr13	59041074	59041183
chr13	59073696	59073850
chr13	59080019	59080238
chr13	59091575	59091827
chr13	59092834	59093116
chr13	59144376	59144570
chr13	59145534	59145683
chr13	59146136	59146497
chr13	60682764	60682950
chr13	60685076	60685284
chr13	60737981	60738256
chr13	63331448	63331741
chr13	63902071	63902245
chr13	63919026	63919251
chr13	68984078	68984163
chr13	69559672	69559883
chr13	69741063	69741101
chr13	69823876	69824125
chr13	90913867	90914224
chr13	91915471	91915524
chr13	91916428	91916669
chr13	91917133	91917311
chr13	92041889	92042120
chr13	92095193	92095430
chr13	92751823	92752016
chr13	93839083	93839330
chr13	94707419	94707791
chr13	94870036	94870393
chr13	94870896	94871228
chr13	94871926	94872051
chr13	94872527	94872675
chr13	94873095	94873316
chr13	94876241	94876448
chr13	94881033	94881954
chr13	94882164	94882381
chr13	94884318	94884604
chr13	94885118	94885194
chr13	94886155	94886331
chr13	95177336	95177521
chr13	96011170	96011459
chr13	96024018	96024226
chr13	97239644	97239723
chr13	97438783	97438859
chr13	97524231	97524282
chr13	97638392	97639195
chr13	97747665	97747899
chr13	97892245	97892485
chr13	97892644	97892951
chr13	97893135	97893332
chr13	97900788	97901025
chr13	99093264	99093598
chr13	99441451	99441872
chr13	99443896	99444071
chr13	99484932	99485146
chr13	99561006	99561191
chr13	99593198	99593341
chr13	99910569	99910712
chr13	99940500	99940860
chr13	101234291	101234351
chr13	101695374	101695464
chr13	102745171	102745230
chr13	104015564	104015749
chr13	104285170	104285358
chr13	110062823	110063068
chr13	110063685	110063973
chr13	110627841	110628026
chr13	111310570	111310796
chr13	112166519	112166726
chr13	112331428	112331602
chr13	113587557	113587636
chr13	113725480	113725689
chr13	116297205	116297227
chr13	116303145	116303357
chr13	116708908	116709234
chr14	3208475	3208476
chr14	4649359	4649365
chr14	8001177	8001438
chr14	11775227	11775493
chr14	16518587	16518772
chr14	19859410	19859601
chr14	19905645	19905852
chr14	19942208	19942536
chr14	19986635	19986644
chr14	20048321	20048506
chr14	20765886	20766267
chr14	21498773	21498805
chr14	21982482	21982584
chr14	24182126	24182220
chr14	24185636	24185861
chr14	24207299	24207510
chr14	24216153	24216420
chr14	24487253	24487297
chr14	24500453	24500844
chr14	24579662	24579847
chr14	24617664	24617895
chr14	24618319	24618835
chr14	24826519	24826718
chr14	24833254	24833472
chr14	24841723	24842162
chr14	25108866	25108909
chr14	25124039	25124397
chr14	25185573	25185822
chr14	25186137	25186684
chr14	25304577	25304940
chr14	25487739	25487925
chr14	25550326	25550745
chr14	25554861	25555082
chr14	25565759	25565826
chr14	25585910	25586447
chr14	25587377	25587419
chr14	25623661	25623969
chr14	25636362	25636932
chr14	25637057	25637339
chr14	30137276	30137315
chr14	30671316	30671404
chr14	30698011	30698257
chr14	30943888	30944117
chr14	31428552	31428781
chr14	31662975	31663018
chr14	31669729	31670099
chr14	32017276	32017406
chr14	35503094	35503209
chr14	36582937	36583312
chr14	40948976	40949386
chr14	45566703	45566871
chr14	47395513	47395599
chr14	47533571	47533808
chr14	51176299	51176327
chr14	51903193	51903233
chr14	52008740	52009119
chr14	52009802	52009824
chr14	52104315	52104409
chr14	54229516	54229572
chr14	54618298	54618345
chr14	54936007	54936118
chr14	54994864	54995158
chr14	55052435	55052700
chr14	55072557	55072566
chr14	55079370	55079810
chr14	55108666	55108715
chr14	55122015	55122280
chr14	55148437	55148806
chr14	55189448	55189880
chr14	55246777	55247041
chr14	57909645	57909837
chr14	57921785	57922129
chr14	60399315	60399506
chr14	60410090	60410478
chr14	60410722	60410835
chr14	60693386	60693549
chr14	61683648	61683898
chr14	62638216	62638316
chr14	62879684	62879894
chr14	62880128	62880400
chr14	63795291	63795331
chr14	64135696	64135714
chr14	64164464	64164767
chr14	64199346	64199744
chr14	64201806	64202047
chr14	64323767	64323971
chr14	64378393	64378636
chr14	64378982	64379503
chr14	64403897	64404137
chr14	64595714	64595919
chr14	65380635	65380853
chr14	65403467	65403675
chr14	65404276	65404500
chr14	66260564	66260683
chr14	66827239	66827522
chr14	66851693	66851760
chr14	66873406	66873511
chr14	66932416	66932514
chr14	67442715	67442787
chr14	67442894	67443171
chr14	69831116	69831425
chr14	69855504	69855604
chr14	70021527	70021792
chr14	70160056	70160080
chr14	70538198	70538267
chr14	70538487	70538700
chr14	70553941	70554036
chr14	74428348	74428516
chr14	74798312	74798533
chr14	76031435	76031620
chr14	76033623	76033716
chr14	76760706	76760931
chr14	76772958	76773316
chr14	76882939	76883099
chr14	79724160	79724436
chr14	93171669	93171705
chr14	99748199	99748276
chr14	99944310	99944659
chr14	118231980	118232050
chr14	118709783	118710152
chr14	119013087	119013329
chr14	119852295	119852348
chr14	120149462	120149556
chr14	120626648	120626984
chr14	121062815	121063060
chr14	121114262	121114521
chr14	123513383	123513821
chr15	8629204	8629282
chr15	10421509	10421660
chr15	12039294	12039378
chr15	12039911	12040141
chr15	12066457	12066862
chr15	12093688	12093943
chr15	12868614	12868861
chr15	25365277	25365287
chr15	25773333	25773506
chr15	27581101	27581299
chr15	27770962	27771242
chr15	27798227	27798479
chr15	27808541	27808815
chr15	27856425	27856657
chr15	27922680	27922990
chr15	27938672	27938781
chr15	27938862	27939063
chr15	31536074	31536317
chr15	36644614	36644801
chr15	36716730	36716856
chr15	36901643	36902368
chr15	36943521	36943813
chr15	37065694	37065805
chr15	37671527	37671775
chr15	37673584	37674029
chr15	38198607	38198719
chr15	38384341	38384345
chr15	38470200	38470206
chr15	38709417	38709746
chr15	39735008	39735217
chr15	39735380	39735868
chr15	39816218	39816542
chr15	41155575	41155624
chr15	44676687	44676893
chr15	57705933	57706109
chr15	58022576	58022715
chr15	58974594	58974644
chr15	58975135	58975332
chr15	58976471	58976868
chr15	58986569	58986900
chr15	58991452	58991637
chr15	59173594	59173779
chr15	59197385	59197574
chr15	59621937	59622000
chr15	59634935	59635120
chr15	62462681	62462805
chr15	64143025	64143210
chr15	64313640	64313760
chr15	66306703	66306731
chr15	68937172	68937230
chr15	72083892	72083971
chr15	72206080	72206393
chr15	72334189	72334348
chr15	73067808	73067827
chr15	73137704	73137949
chr15	73149106	73149300
chr15	73152379	73152571
chr15	73187198	73187259
chr15	73617561	73617713
chr15	73618605	73618845
chr15	74204076	74204327
chr15	74329305	74329569
chr15	74529604	74529853
chr15	74535285	74535470
chr15	74535617	74535753
chr15	74537771	74537786
chr15	74667635	74668032
chr15	75548961	75549193
chr15	75614848	75615039
chr15	76195715	76195770
chr15	77154505	77154525
chr15	77337061	77337079
chr15	77356573	77356693
chr15	77367378	77367456
chr15	77367776	77367961
chr15	77368247	77368375
chr15	77798728	77798971
chr15	77933776	77934114
chr15	78044753	78044850
chr15	78437425	78437588
chr15	78447744	78447809
chr15	78531080	78531344
chr15	78670546	78670705
chr15	78683442	78683627
chr15	78684234	78684615
chr15	78710008	78710064
chr15	78851936	78852162
chr15	79202705	79202927
chr15	79209435	79209620
chr15	79224714	79224930
chr15	79242713	79242905
chr15	79243087	79243240
chr15	79243556	79243704
chr15	79380864	79381110
chr15	79826650	79826929
chr15	79835141	79835210
chr15	79950036	79950254
chr15	80024941	80025273
chr15	80671415	80671440
chr15	81831374	81831758
chr15	81880054	81880284
chr15	81938524	81938748
chr15	81989553	81989715
chr15	82417586	82417783
chr15	82856552	82856784
chr15	82929509	82930039
chr15	82940943	82941640
chr15	82964666	82964731
chr15	83034808	83034994
chr15	84073201	84073307
chr15	84211945	84212020
chr15	84300992	84301278
chr15	84654895	84655070
chr15	85296003	85296201
chr15	85457464	85457649
chr15	85494121	85494448
chr15	85610790	85610978
chr15	85613168	85613650
chr15	85655802	85655987
chr15	85687219	85687431
chr15	85709196	85709669
chr15	85710292	85710309
chr15	86001118	86001134
chr15	86113063	86113605
chr15	86277852	86277921
chr15	87686269	87686454
chr15	88828360	88828832
chr15	88842625	88842772
chr15	89169507	89169549
chr15	89170172	89170190
chr15	91524804	91524881
chr15	91614492	91614719
chr15	94732158	94732467
chr15	96600104	96600318
chr15	97151944	97152081
chr15	97276643	97276892
chr15	97315487	97315675
chr15	97608052	97608098
chr15	97718107	97718364
chr15	97790639	97790824
chr15	97802956	97802957
chr15	97849830	97849915
chr15	98928604	98928913
chr15	98972109	98972136
chr15	98991622	98991873
chr15	98994007	98994042
chr15	99471188	99471253
chr15	99501973	99502514
chr15	99669280	99669304
chr15	99714904	99715275
chr15	99715374	99715888
chr15	99724236	99724254
chr15	100757789	100757877
chr15	101984586	101984611
chr15	102405705	102405727
chr15	102692207	102692268
chr15	102708423	102708563
chr15	102742825	102743414
chr15	102743876	102744262
chr15	102788847	102789055
chr15	102802197	102802398
chr15	103299076	103299271
chr15	103307281	103307466
chr15	103342250	103342598
chr16	4551331	4551388
chr16	4607142	4607233
chr16	4885252	4885267
chr16	4913217	4913513
chr16	4913769	4914082
chr16	7070597	7070679
chr16	8539298	8539525
chr16	10786525	10786696
chr16	11090866	11091063
chr16	11579705	11579890
chr16	11625865	11626257
chr16	11669983	11670268
chr16	11670668	11670825
chr16	12076579	12076821
chr16	13197111	13197363
chr16	15723931	15724139
chr16	16896415	16896453
chr16	18083332	18083580
chr16	18345341	18345703
chr16	18406355	18406599
chr16	18407861	18407981
chr16	18459583	18459749
chr16	18686981	18687168
chr16	20097175	20097404
chr16	20702469	20702703
chr16	21665234	21665245
chr16	23991231	23991450
chr16	24434514	24434857
chr16	24435133	24435361
chr16	24483866	24484081
chr16	27387867	27387910
chr16	27523803	27524181
chr16	28089411	28089482
chr16	30008398	30008434
chr16	30069738	30069796
chr16	30184949	30185198
chr16	30661492	30661674
chr16	31004048	31004233
chr16	31499743	31500011
chr16	31897588	31897813
chr16	31932405	31932633
chr16	31932835	31932905
chr16	31944077	31944092
chr16	32499865	32499884
chr16	34253780	34253983
chr16	34330051	34330105
chr16	34470006	34470193
chr16	34517438	34517447
chr16	37676042	37676214
chr16	37802988	37803209
chr16	37812561	37813049
chr16	37974660	37974846
chr16	38138986	38139244
chr16	39303617	39303888
chr16	42396571	42396850
chr16	42717325	42717692
chr16	42717908	42718295
chr16	44716772	44717087
chr16	44725985	44726089
chr16	49504336	49504374
chr16	78427974	78427991
chr16	84916929	84917145
chr16	84956398	84956583
chr16	85038218	85038410
chr16	89762418	89762434
chr16	90041279	90041290
chr16	90072662	90072708
chr16	90073616	90073924
chr16	90176482	90176659
chr16	90629066	90629399
chr16	91546471	91546491
chr16	92099655	92099930
chr16	92115493	92115792
chr16	92139555	92139775
chr16	94269836	94269851
chr16	94270077	94270097
chr16	94472677	94473036
chr16	94714039	94714095
chr16	94872827	94873012
chr16	95831359	95831647
chr16	95831742	95832473
chr16	96498949	96499282
chr16	96673167	96673963
chr16	96721355	96721705
chr16	96758540	96758918
chr16	96872836	96873037
chr16	96945622	96945829
chr16	97007934	97008119
chr16	97100349	97100503
chr16	97171702	97172070
chr16	97272593	97272634
chr16	97293439	97293502
chr16	97536743	97536933
chr17	3082316	3082343
chr17	5057462	5057532
chr17	5286828	5287096
chr17	5310414	5310901
chr17	5537267	5537301
chr17	5752759	5752775
chr17	6180457	6180734
chr17	6861424	6861453
chr17	7367067	7367136
chr17	8367758	8367827
chr17	8368583	8368966
chr17	8373374	8373413
chr17	8506702	8506899
chr17	8508832	8508907
chr17	9168759	9168833
chr17	9169862	9170019
chr17	9756693	9756900
chr17	10390761	10390955
chr17	11613226	11613356
chr17	12266335	12266785
chr17	13668779	13668993
chr17	15207655	15207666
chr17	24068916	24069145
chr17	24211141	24211227
chr17	24485431	24485705
chr17	24538042	24538248
chr17	24724577	24724590
chr17	25398408	25398722
chr17	25418968	25419400
chr17	25470827	25470980
chr17	25518165	25518595
chr17	25560598	25560878
chr17	25837780	25838052
chr17	26009704	26009891
chr17	26381330	26381409
chr17	26462655	26462759
chr17	26463002	26463063
chr17	26693268	26693475
chr17	26693901	26694145
chr17	26701653	26701987
chr17	27125147	27125154
chr17	27501339	27501524
chr17	27701042	27701126
chr17	27708244	27708323
chr17	27761699	27762069
chr17	28085162	28085165
chr17	28207524	28207756
chr17	28327606	28327806
chr17	28904835	28905410
chr17	29176718	29177042
chr17	29327319	29327539
chr17	29330762	29330962
chr17	29348473	29348550
chr17	29355220	29355347
chr17	29668401	29668762
chr17	29794951	29794989
chr17	29795841	29795882
chr17	29796246	29796461
chr17	29873773	29873922
chr17	31114055	31114333
chr17	31564509	31564545
chr17	31685681	31685741
chr17	31693417	31693447
chr17	31724999	31725251
chr17	31766721	31767123
chr17	31789813	31790123
chr17	31790332	31790863
chr17	31790945	31791262
chr17	31810093	31810284
chr17	31817069	31817314
chr17	32091908	32091932
chr17	33628602	33628837
chr17	33865623	33865629
chr17	33980947	33980963
chr17	34641199	34641349
chr17	34700135	34700320
chr17	35829881	35830134
chr17	37074252	37074336
chr17	43135758	43136124
chr17	45584964	45585081
chr17	45734341	45734496
chr17	45735657	45735677
chr17	47038906	47039060
chr17	48543534	48543665
chr17	48772021	48772329
chr17	49018252	49018452
chr17	50006346	50006611
chr17	50006826	50006964
chr17	50007226	50007298
chr17	50020229	50020287
chr17	50020537	50020587
chr17	50020671	50021069
chr17	50048264	50048648
chr17	50100184	50100304
chr17	50150885	50151072
chr17	50237020	50237132
chr17	50237439	50237465
chr17	56018654	56018657
chr17	56037275	56037284
chr17	56251255	56251343
chr17	56251630	56251684
chr17	56291420	56291498
chr17	56360145	56360885
chr17	56370860	56371904
chr17	56380401	56380619
chr17	56406099	56406141
chr17	56446343	56446543
chr17	56476638	56476686
chr17	56487901	56488163
chr17	56547210	56547493
chr17	56552438	56552945
chr17	56584932	56584949
chr17	56693664	56694022
chr17	56897860	56898107
chr17	57277190	57277230
chr17	62760019	62760098
chr17	62760866	62760890
chr17	62884364	62884483
chr17	65702289	65702519
chr17	66325706	66326075
chr17	67452396	67452467
chr17	68840650	68840710
chr17	69181321	69181386
chr17	70429764	70429895
chr17	70848614	70848698
chr17	71691447	71691521
chr17	72926177	72926262
chr17	78604253	78604492
chr17	83740549	83741164
chr17	83903352	83903631
chr17	84114077	84114116
chr17	86263955	86264216
chr17	86330297	86330772
chr17	86379442	86379630
chr17	86416097	86416491
chr17	86444570	86444702
chr17	86771932	86772117
chr17	86906087	86906212
chr17	86906494	86906562
chr17	86986771	86987007
chr17	87237011	87237280
chr17	87237488	87237534
chr17	87315105	87315420
chr17	87329831	87330024
chr17	87332013	87332043
chr17	87377734	87377983
chr17	87378237	87378450
chr17	87379869	87380211
chr17	87391426	87391644
chr17	87571731	87571793
chr17	87878010	87878094
chr17	88543438	88543622
chr17	88558542	88558678
chr17	90696381	90696719
chr18	3839801	3839808
chr18	4514879	4515163
chr18	5162038	5162095
chr18	5414491	5414728
chr18	5819051	5819260
chr18	7608949	7608971
chr18	11883358	11883854
chr18	12026141	12026242
chr18	12200042	12200410
chr18	12488102	12488168
chr18	13786670	13786711
chr18	16038491	16038589
chr18	20747329	20747518
chr18	22985378	22985464
chr18	23868473	23868806
chr18	23942439	23942483
chr18	25527918	25528017
chr18	25539182	25539207
chr18	25548148	25548777
chr18	25549468	25549871
chr18	25550064	25550261
chr18	25646051	25646263
chr18	25647256	25647464
chr18	25715223	25715282
chr18	25724152	25724340
chr18	25724766	25724992
chr18	25726828	25726870
chr18	28077948	28078081
chr18	29207542	29207748
chr18	30365953	30365979
chr18	30530059	30530395
chr18	31448461	31448531
chr18	31449164	31449248
chr18	34289707	34289778
chr18	34900469	34900677
chr18	35021959	35022219
chr18	35027253	35027549
chr18	35027836	35028190
chr18	35087498	35087763
chr18	35488917	35489116
chr18	35844914	35845170
chr18	35920946	35921203
chr18	35930976	35931000
chr18	35932872	35932898
chr18	35933964	35934130
chr18	35937139	35937803
chr18	35939057	35939557
chr18	35939951	35940102
chr18	35959532	35959634
chr18	36319142	36319380
chr18	36492991	36493153
chr18	37766002	37766057
chr18	37841096	37841633
chr18	37852129	37852212
chr18	37877553	37877571
chr18	37883543	37883768
chr18	38068041	38068260
chr18	38069071	38069407
chr18	38147878	38148159
chr18	38159101	38159398
chr18	38192119	38192304
chr18	38241065	38241287
chr18	38350825	38350988
chr18	38380385	38380853
chr18	38632696	38632917
chr18	38930464	38930511
chr18	39087438	39087470
chr18	39298755	39298969
chr18	39319702	39319887
chr18	39371144	39371410
chr18	39917594	39917779
chr18	42668927	42669113
chr18	42669233	42669502
chr18	43279782	43280166
chr18	46489137	46489247
chr18	54749956	54750200
chr18	54828457	54828675
chr18	55067486	55067801
chr18	55379633	55379736
chr18	55624431	55624573
chr18	56811880	56812094
chr18	57438859	57439044
chr18	57533430	57533610
chr18	59061701	59061726
chr18	60628367	60628589
chr18	60709954	60710298
chr18	60723523	60723817
chr18	60734669	60734986
chr18	60888432	60888626
chr18	60978027	60978168
chr18	61335674	61335697
chr18	61637853	61638002
chr18	61638323	61638615
chr18	61845189	61845453
chr18	61900821	61901121
chr18	62972794	62972804
chr18	64346068	64346318
chr18	65055300	65055488
chr18	65149499	65150160
chr18	65150376	65150723
chr18	68116605	68116790
chr18	75047469	75047489
chr18	75278033	75278289
chr18	75284329	75284424
chr18	75434072	75434130
chr18	75434617	75434715
chr18	75435157	75435342
chr18	75503708	75503770
chr18	75598448	75598558
chr18	75606838	75608165
chr18	75610561	75610883
chr18	75647533	75647880
chr18	75674038	75674282
chr18	75684243	75684500
chr18	75715936	75716139
chr18	75724241	75724629
chr18	76988131	76988316
chr18	78205958	78206012
chr18	78337402	78337470
chr18	78378698	78378896
chr18	78913732	78913972
chr18	80377543	80378018
chr18	80980833	80981554
chr18	82526209	82526566
chr18	82529508	82529520
chr18	82568023	82568672
chr18	82716714	82717018
chr18	82718664	82718942
chr18	82798692	82798808
chr18	82812625	82813114
chr18	82976142	82976235
chr19	5811179	5811406
chr19	5812051	5812404
chr19	5814051	5814273
chr19	5850237	5850536
chr19	6445665	6445850
chr19	6451958	6452628
chr19	6453380	6453726
chr19	6549718	6550014
chr19	6577135	6577185
chr19	7091553	7091790
chr19	7113584	7113769
chr19	7160878	7160954
chr19	8740724	8740776
chr19	9920887	9921072
chr19	10040878	10040904
chr19	10243070	10243079
chr19	10243953	10244184
chr19	10267447	10267455
chr19	10403857	10404203
chr19	10709318	10709672
chr19	10905531	10905791
chr19	12475541	12475717
chr19	12487674	12487882
chr19	12488281	12488500
chr19	12489968	12490180
chr19	15340224	15340619
chr19	15667866	15668051
chr19	16327853	16328124
chr19	22354111	22354235
chr19	22463567	22463786
chr19	22884460	22884534
chr19	22940505	22940897
chr19	22958546	22958753
chr19	23003839	23004261
chr19	23133926	23134000
chr19	23507542	23507750
chr19	23892814	23892856
chr19	23898613	23898842
chr19	23941591	23941898
chr19	23973204	23973501
chr19	24016936	24017212
chr19	24308204	24308592
chr19	27904326	27904528
chr19	27904795	27905063
chr19	30109276	30109630
chr19	30113012	30113234
chr19	30117940	30118198
chr19	32221008	32221170
chr19	36679100	36679419
chr19	37078154	37078363
chr19	38260436	38260646
chr19	38271117	38271128
chr19	38271407	38271456
chr19	40369978	40370441
chr19	40370598	40370870
chr19	40612489	40612588
chr19	41086625	41086839
chr19	41613413	41613695
chr19	41657307	41657699
chr19	41664122	41664404
chr19	41679170	41679355
chr19	41685477	41685662
chr19	41835711	41835734
chr19	42166607	42166653
chr19	42316982	42317251
chr19	44292762	44292794
chr19	45027761	45027946
chr19	45030271	45030571
chr19	45031010	45031119
chr19	45031199	45031862
chr19	45311150	45311224
chr19	45541026	45541114
chr19	45574470	45574614
chr19	45607806	45607876
chr19	45814032	45814187
chr19	46339729	46340019
chr19	46374840	46375101
chr19	46484336	46484521
chr19	46969707	46969845
chr19	46970096	46970117
chr19	46971225	46971526
chr19	47334757	47335017
chr19	47338449	47338671
chr19	53076075	53076487
chr19	53248253	53248356
chr19	53830598	53830804
chr19	53852758	53852907
chr19	53853586	53853700
chr19	55851595	55851843
chr19	57302163	57302365
chr19	57961936	57962099
chr19	59029086	59029336
chr19	59196412	59196602
chr2	3169441	3169504
chr2	4529380	4529586
chr2	5117097	5117228
chr2	6212543	6212637
chr2	11333507	11333585
chr2	17715371	17715669
chr2	17839009	17839338
chr2	18032255	18032272
chr2	21060275	21060518
chr2	21919166	21919350
chr2	21920836	21921131
chr2	24678914	24678931
chr2	25098977	25099050
chr2	25178568	25178759
chr2	25228870	25229290
chr2	26300556	26300730
chr2	26409353	26409396
chr2	26627689	26627720
chr2	27572520	27572733
chr2	27739676	27739740
chr2	27764304	27764524
chr2	27764660	27765040
chr2	28512650	28512657
chr2	28515747	28515974
chr2	28516366	28516595
chr2	28517169	28517866
chr2	28521592	28521971
chr2	29266887	29267170
chr2	29448776	29448988
chr2	29619273	29619493
chr2	29817916	29818254
chr2	29819318	29819593
chr2	30343459	30343793
chr2	30344060	30344205
chr2	30613540	30613652
chr2	30629274	30629501
chr2	30647426	30647829
chr2	30647967	30648236
chr2	30654227	30654424
chr2	30657697	30657914
chr2	30659455	30659647
chr2	30659949	30660170
chr2	30660574	30660772
chr2	30687056	30687244
chr2	30699747	30700032
chr2	30719838	30719923
chr2	30720522	30720659
chr2	30721928	30722620
chr2	30725259	30725565
chr2	30725977	30726303
chr2	30744125	30744350
chr2	30772289	30772353
chr2	30796153	30796243
chr2	30928624	30928953
chr2	31638675	31638970
chr2	32323142	32323175
chr2	32627821	32628060
chr2	32631969	32632059
chr2	32757081	32757100
chr2	32852049	32852133
chr2	32857803	32857872
chr2	33058915	33059305
chr2	33316607	33316865
chr2	33317004	33317204
chr2	33546988	33547309
chr2	33785788	33786005
chr2	34027256	34027604
chr2	35637947	35638166
chr2	35728650	35728850
chr2	36198301	36198413
chr2	37908705	37908935
chr2	37909148	37909239
chr2	38647387	38647885
chr2	38997657	38997679
chr2	49572591	49572595
chr2	49643001	49643220
chr2	49654674	49654967
chr2	49672394	49672922
chr2	49719992	49720177
chr2	49723183	49723335
chr2	49726872	49727227
chr2	49747782	49747983
chr2	50120886	50121579
chr2	52624017	52624107
chr2	52624385	52624448
chr2	52632410	52632497
chr2	62718003	62718204
chr2	65896615	65896676
chr2	66042312	66042337
chr2	68302166	68302351
chr2	70114206	70114425
chr2	70127892	70127996
chr2	70150472	70150718
chr2	70169009	70169319
chr2	70218342	70218643
chr2	70560463	70560501
chr2	70592756	70592893
chr2	70629780	70629806
chr2	71161596	71161848
chr2	71162785	71163100
chr2	71245480	71245775
chr2	71512444	71512622
chr2	71539121	71539451
chr2	71539570	71539738
chr2	71750249	71750346
chr2	72038418	72038445
chr2	72178652	72178771
chr2	73605113	73605540
chr2	73607573	73608036
chr2	75988507	75988549
chr2	77946572	77946576
chr2	85253534	85253596
chr2	91183973	91183974
chr2	91474547	91474565
chr2	91944478	91944620
chr2	91949392	91949543
chr2	91971948	91971999
chr2	92422720	92422940
chr2	92423733	92423994
chr2	92424936	92425117
chr2	92608341	92608549
chr2	92608720	92609101
chr2	92712445	92712991
chr2	92723662	92723856
chr2	92726488	92726720
chr2	92800983	92801213
chr2	92812644	92812839
chr2	92813201	92813295
chr2	92813470	92813572
chr2	92948567	92948948
chr2	93014431	93014461
chr2	93166751	93167022
chr2	93176740	93177058
chr2	93179647	93179949
chr2	93954457	93954659
chr2	93975940	93976148
chr2	94035596	94035792
chr2	101905607	101905655
chr2	101906362	101906373
chr2	102029854	102030283
chr2	102874214	102874491
chr2	104318835	104319322
chr2	105677396	105677524
chr2	105677746	105677800
chr2	113363656	113363990
chr2	117228600	117228782
chr2	117439667	117439883
chr2	118544796	118544867
chr2	118545669	118545769
chr2	119803442	119803788
chr2	122348111	122348179
chr2	122380647	122380720
chr2	122381236	122381248
chr2	130487801	130487986
chr2	131892640	131892712
chr2	131909069	131909129
chr2	132316325	132316379
chr2	132607219	132607326
chr2	132716285	132716470
chr2	136108423	136108655
chr2	136108807	136109133
chr2	136670623	136670873
chr2	138449010	138449032
chr2	139220970	139221200
chr2	142770104	142770180
chr2	145588366	145588416
chr2	145884799	145885219
chr2	146280096	146280457
chr2	146835899	146836061
chr2	146836272	146836572
chr2	146837114	146837115
chr2	146837120	146837542
chr2	146837668	146837690
chr2	146838532	146838649
chr2	146959742	146959837
chr2	147189400	147189687
chr2	147305362	147305408
chr2	148396010	148396152
chr2	148902225	148902276
chr2	150643876	150644107
chr2	151574990	151575146
chr2	151603896	151604081
chr2	151949270	151949455
chr2	152167963	152168265
chr2	152415666	152415813
chr2	152654364	152654412
chr2	152654657	152654686
chr2	152696878	152697270
chr2	152706052	152706497
chr2	152785609	152785882
chr2	152820418	152820724
chr2	153491192	153491234
chr2	153493693	153493850
chr2	153494232	153494529
chr2	153511684	153511993
chr2	153808079	153808221
chr2	156278632	156278950
chr2	156460628	156460861
chr2	156488995	156489226
chr2	156727114	156727139
chr2	157049885	157050123
chr2	157313801	157314056
chr2	157314174	157314401
[truncated: 1,571 more rows]

## Sheet: ZFHX3+H3K4ME3
chr	start	end
chr1	4491597	4492596
chr1	4492847	4493482
chr1	5017990	5018165
chr1	5588382	5588657
chr1	5916785	5917104
chr1	6382899	6383161
chr1	6441111	6441325
chr1	7397028	7397040
chr1	9545170	9545468
chr1	9699982	9700210
chr1	9700503	9700570
chr1	9700995	9701048
chr1	9967836	9968345
chr1	10039545	10039696
chr1	12835675	12835843
chr1	12990444	12990855
chr1	12991509	12991912
chr1	12992715	12992883
chr1	13128217	13128462
chr1	13374728	13374790
chr1	13561918	13562070
chr1	13590001	13590220
chr1	14310167	14310215
chr1	14506295	14506317
chr1	14506476	14506778
chr1	14506925	14507036
chr1	14756031	14756281
chr1	15892589	15892810
chr1	17096891	17096939
chr1	17097666	17097895
chr1	17123455	17123670
chr1	17727614	17727799
chr1	18057911	18058035
chr1	19205771	19205969
chr1	20477859	20478226
chr1	20819982	20820242
chr1	21078810	21079163
chr1	21166310	21166431
chr1	21271400	21271627
chr1	21960453	21960646
chr1	21962174	21962469
chr1	22533240	22533343
chr1	23255977	23256229
chr1	23381810	23382083
chr1	23762732	23763017
chr1	24099517	24099549
chr1	24101132	24101280
chr1	24586613	24587550
chr1	33813377	33813378
chr1	34440292	34440344
chr1	34536948	34537134
chr1	36067767	36067775
chr1	36068251	36068398
chr1	36254794	36255029
chr1	36303133	36303562
chr1	36307587	36307786
chr1	36367729	36367995
chr1	36369184	36369374
chr1	36472336	36472366
chr1	36558580	36558691
chr1	36784728	36785013
chr1	37299843	37299910
chr1	37541069	37541198
chr1	37719295	37719362
chr1	37720199	37720267
chr1	37865112	37865350
chr1	37890420	37890619
chr1	38627229	38627231
chr1	38628158	38628167
chr1	39192710	39192914
chr1	39535545	39535742
chr1	39536488	39536629
chr1	39651334	39651364
chr1	40266599	40266615
chr1	40680887	40681480
chr1	40681614	40682216
chr1	40790181	40790236
chr1	40790534	40790773
chr1	42258193	42258274
chr1	42491728	42491994
chr1	42695669	42695804
chr1	42697377	42697433
chr1	42697859	42698860
chr1	42699505	42699697
chr1	42704302	42704342
chr1	42714520	42714550
chr1	42850959	42850999
chr1	43446986	43446995
chr1	43827807	43828137
chr1	44102024	44102029
chr1	44198648	44199096
chr1	44551543	44551792
chr1	45925503	45925710
chr1	45926022	45926258
chr1	50929123	50929214
chr1	51915135	51915319
chr1	52113809	52113893
chr1	52120010	52120039
chr1	52500226	52500231
chr1	52597845	52598064
chr1	52630554	52630578
chr1	52844772	52844790
chr1	52845806	52845872
chr1	53784665	53785195
chr1	54250605	54251147
chr1	54439039	54439147
chr1	54734952	54735001
chr1	55237041	55237251
chr1	55238384	55238733
chr1	55363144	55363465
chr1	55363588	55363882
chr1	56970891	56971264
chr1	56971490	56971785
chr1	56972045	56974016
chr1	56976963	56977627
chr1	56978296	56978354
chr1	57377488	57377544
chr1	57968899	57969089
chr1	57995932	57996376
chr1	58504917	58505215
chr1	59236751	59236803
chr1	59481783	59481947
chr1	59482052	59482138
chr1	59482491	59482793
chr1	59483245	59483995
chr1	59574987	59575149
chr1	61139182	61139416
chr1	61181143	61181341
chr1	61638711	61638875
chr1	63247095	63247113
chr1	63248880	63249027
chr1	63277218	63277294
chr1	63668986	63669027
chr1	64338179	64338367
chr1	64616332	64616524
chr1	64690683	64690942
chr1	64735115	64736559
chr1	64736642	64736921
chr1	64737067	64737155
chr1	64737706	64737770
chr1	64737877	64738031
chr1	64738227	64738334
chr1	66862649	66862834
chr1	66863271	66863585
chr1	66895921	66895982
chr1	69689058	69689143
chr1	69790401	69790443
chr1	69791025	69791052
chr1	69827230	69827289
chr1	71102588	71102954
chr1	71837929	71838208
chr1	72212277	72212432
chr1	72236093	72236189
chr1	72534696	72534801
chr1	72641112	72641166
chr1	72824532	72824823
chr1	73962990	73963014
chr1	74098481	74098992
chr1	74284726	74285007
chr1	74397316	74397532
chr1	74505375	74505403
chr1	74713707	74713798
chr1	74748762	74748808
chr1	74772154	74772365
chr1	74784191	74784689
chr1	74792061	74792269
chr1	74794671	74794927
chr1	74807744	74807954
chr1	74808042	74808152
chr1	74808365	74808538
chr1	74882008	74882848
chr1	74885651	74885901
chr1	74892784	74892949
chr1	74893095	74893657
chr1	74900709	74900767
chr1	74949058	74949204
chr1	74949756	74950069
chr1	74950368	74950582
chr1	74950742	74951270
chr1	75180283	75180477
chr1	75209450	75209454
chr1	75219992	75220047
chr1	75251655	75251745
chr1	75317615	75317629
chr1	75317918	75318163
chr1	75435803	75435904
chr1	75445892	75446074
chr1	75477263	75477662
chr1	75487890	75488107
chr1	75559589	75559633
chr1	75925849	75926013
chr1	77506268	77506401
chr1	77514914	77515150
chr1	77515263	77515332
chr1	77516015	77516660
chr1	77516757	77517012
chr1	78196420	78197324
chr1	78203384	78204268
chr1	78215870	78217739
chr1	78217981	78218110
chr1	78310014	78310387
chr1	78511577	78511621
chr1	79671553	79671959
chr1	79775966	79776065
chr1	82289078	82289281
chr1	82289382	82289679
chr1	82725869	82725955
chr1	83345724	83345840
chr1	84696641	84696659
chr1	84838291	84838315
chr1	84933688	84933813
chr1	86303074	86303432
chr1	86528903	86528953
chr1	86669668	86670338
chr1	87153901	87154196
chr1	87154281	87154995
chr1	87156014	87156129
chr1	87184761	87184982
chr1	87186902	87187249
chr1	87264347	87265049
chr1	87265483	87265680
chr1	87327896	87328026
chr1	87475194	87475651
chr1	87854511	87854702
chr1	88205587	88205841
chr1	88330927	88330985
chr1	89071228	89071362
chr1	89550123	89550206
chr1	89751008	89751206
chr1	89930232	89930615
chr1	89930763	89931520
chr1	89941841	89942326
chr1	89968901	89968902
chr1	90203799	90203893
chr1	90999412	90999566
chr1	91052889	91053040
chr1	91053428	91053651
chr1	91345186	91345554
chr1	91414054	91414521
chr1	91494449	91494654
chr1	91540282	91540553
chr1	91541345	91541352
chr1	92180481	92180503
chr1	92832711	92832924
chr1	92903029	92903296
chr1	92912321	92912446
chr1	93176517	93176892
chr1	93235681	93235807
chr1	93236652	93236736
chr1	93342502	93342964
chr1	93512703	93512747
chr1	93668795	93669062
chr1	93685451	93685530
chr1	94034986	94035192
chr1	96871779	96871797
chr1	99772330	99772550
chr1	105663007	105663244
chr1	105664936	105664983
chr1	105780421	105780609
chr1	105780813	105780930
chr1	105989887	105989955
chr1	105993215	105993241
chr1	106171423	106171675
chr1	106795979	106796011
chr1	106797086	106797333
chr1	112416527	112416604
chr1	112416814	112416939
chr1	118460885	118460889
chr1	119053345	119053905
chr1	119189689	119189697
chr1	119420387	119420399
chr1	119420572	119420993
chr1	119422259	119422514
chr1	119504738	119505178
chr1	119648332	119648379
chr1	119913694	119913740
chr1	120073586	120073991
chr1	120340550	120340837
chr1	120341042	120341311
chr1	120602107	120602546
chr1	120602727	120603625
chr1	120607285	120607403
chr1	121326931	121327162
chr1	121430985	121431081
chr1	121527585	121527819
chr1	125911025	125911060
chr1	125911178	125911690
chr1	125912157	125912479
chr1	127537447	127537574
chr1	127678422	127678710
chr1	128359290	128359893
chr1	128417769	128417811
chr1	128591026	128591755
chr1	128592119	128592765
chr1	128592950	128593383
chr1	129274164	129274185
chr1	130462137	130462175
chr1	130715197	130715206
chr1	130718081	130718132
chr1	131246079	131246143
chr1	131527376	131528303
chr1	131658214	131658222
chr1	131866979	131867337
chr1	131867575	131867814
chr1	131963012	131963433
chr1	132068195	132068290
chr1	132191320	132191520
chr1	132212360	132212575
chr1	132315824	132316148
chr1	132316535	132316628
chr1	132758719	132758832
chr1	133034128	133034271
chr1	133132700	133132755
chr1	133163795	133164053
chr1	133164264	133164289
chr1	133363438	133363504
chr1	133418161	133418179
chr1	133609698	133609726
chr1	133610394	133610404
chr1	134046693	134046731
chr1	134099886	134099910
chr1	134120504	134120668
chr1	134244003	134244775
chr1	134361283	134361314
chr1	134405600	134406042
chr1	134646465	134646814
chr1	134708941	134709483
chr1	134709877	134710168
chr1	134955977	134956202
chr1	134962390	134962797
chr1	134987513	134987524
chr1	135259156	135259251
chr1	135686888	135687097
chr1	135688091	135688210
chr1	135688380	135688660
chr1	135699462	135699607
chr1	136007475	136007707
chr1	136018819	136018858
chr1	136050893	136051128
chr1	136234062	136234768
chr1	136326120	136326184
chr1	136466176	136466642
chr1	136781726	136781913
chr1	136948262	136949404
chr1	136952940	136953267
chr1	138136356	138136714
chr1	138841529	138842122
chr1	138842252	138842254
chr1	138843393	138844021
chr1	138844230	138844300
chr1	138846676	138846891
chr1	138847180	138847355
chr1	138848225	138849090
chr1	138856449	138856584
chr1	140245473	140245488
chr1	143703235	143703246
chr1	143777065	143777270
chr1	143777740	143777758
chr1	150099643	150099976
chr1	151756033	151756081
chr1	152386711	152386743
chr1	152766345	152766604
chr1	152904806	152904846
chr1	153549743	153549897
chr1	153666501	153666719
chr1	153739706	153739743
chr1	153749226	153749595
chr1	154204906	154205296
chr1	155099614	155099793
chr1	155741501	155743356
chr1	155813456	155813605
chr1	156204521	156204706
chr1	156302792	156302971
chr1	156558254	156558272
chr1	160194978	160195241
chr1	160792005	160792069
chr1	160792927	160792968
chr1	161070743	161070998
chr1	161876836	161877403
chr1	163150559	163150658
chr1	163314251	163314262
chr1	163779393	163779607
chr1	163930582	163930727
chr1	163994434	163994870
chr1	165764142	165764306
chr1	166002739	166003057
chr1	166154265	166154280
chr1	166253857	166254249
chr1	166940260	166940286
chr1	167002121	167002906
chr1	167283688	167283773
chr1	167309077	167309174
chr1	167340173	167340259
chr1	167340268	167340487
chr1	167688317	167689436
chr1	167689552	167689627
chr1	167692002	167692485
chr1	167802468	167802769
chr1	167929750	167930094
chr1	169531273	169531616
chr1	170255155	170255166
chr1	170292733	170292779
chr1	170588366	170588557
chr1	171033396	171033590
chr1	171035772	171035957
chr1	171064103	171064137
chr1	171064255	171064797
chr1	171102906	171102953
chr1	171220988	171221021
chr1	171281072	171281268
chr1	171328095	171328226
chr1	171437323	171437446
chr1	172054004	172054195
chr1	172326069	172326151
chr1	172326239	172326350
chr1	172481662	172481784
chr1	172490270	172490571
chr1	172562049	172562451
chr1	172562625	172562688
chr1	175692802	175693223
chr1	175880967	175881019
chr1	176274558	176274940
chr1	176275694	176275823
chr1	177259231	177259328
chr1	177441984	177442098
chr1	177442505	177442525
chr1	177795768	177795770
chr1	177983839	177984206
chr1	177984374	177984633
chr1	178188081	178188427
chr1	178275815	178275911
chr1	178527338	178527345
chr1	179802786	179802813
chr1	180387495	180387745
chr1	180483400	180483565
chr1	180484118	180484200
chr1	180640633	180641043
chr1	180641273	180641510
chr1	180641944	180642017
chr1	180726696	180726721
chr1	181150766	181150802
chr1	181256333	181256445
chr1	181256790	181256951
chr1	181257071	181257139
chr1	181352371	181352809
chr1	181353006	181353344
chr1	181545458	181545512
chr1	181881539	181881752
chr1	182281358	182281565
chr1	182959514	182959650
chr1	182983067	182983563
chr1	183221074	183221078
chr1	183388811	183389083
chr1	184037209	184037253
chr1	184235947	184236052
chr1	184718467	184718697
chr1	184727702	184728108
chr1	184730338	184730340
chr1	184731499	184732538
chr1	184732764	184733236
chr1	184733451	184734751
chr1	184810836	184811045
chr1	184882848	184883057
chr1	187608506	187610175
chr1	187997570	187998223
chr1	189687922	189688345
chr1	189921155	189921341
chr1	189973099	189973192
chr1	190171442	190171802
chr1	190171822	190172107
chr1	190172342	190172392
chr1	190174314	190174562
chr1	191062896	191063134
chr1	191097892	191098172
chr1	191098376	191098568
chr1	191182368	191185500
chr1	191312525	191312661
chr1	191575252	191575702
chr1	191576398	191576469
chr1	191821298	191821704
chr1	191907464	191907897
chr1	192092040	192092053
chr1	192092412	192093136
chr1	192190405	192190745
chr1	192835675	192835698
chr1	192856072	192856099
chr1	193172605	193172646
chr1	193174326	193174397
chr1	193382918	193383118
chr1	193703216	193703219
chr1	194619032	194619264
chr1	194621471	194621659
chr1	194879475	194879867
chr1	195241537	195241687
chr10	4346781	4347068
chr10	4712277	4712504
chr10	4712755	4712906
chr10	5804854	5805049
chr10	5806646	5806678
chr10	7390552	7391065
chr10	7391145	7391837
chr10	7393307	7393642
chr10	9902099	9902255
chr10	10557922	10558478
chr10	10689065	10689555
chr10	11149109	11149420
chr10	11344846	11345013
chr10	12574777	12575023
chr10	12922446	12922665
chr10	12964153	12964460
chr10	13008201	13008525
chr10	13090487	13090824
chr10	13091006	13091394
chr10	13473978	13473993
chr10	13474203	13474536
chr10	13502023	13502065
chr10	13564827	13564952
chr10	18022514	18022628
chr10	18055170	18055301
chr10	18197378	18197474
chr10	18845056	18845112
chr10	18845268	18845447
chr10	19014766	19014976
chr10	19015819	19016025
chr10	19591702	19591949
chr10	19712457	19712843
chr10	19850465	19851733
chr10	19851938	19852193
chr10	19907200	19907284
chr10	20148432	20148736
chr10	20347638	20348015
chr10	20528912	20529131
chr10	21055482	21055554
chr10	21144767	21144815
chr10	21158651	21159461
chr10	21159644	21160375
chr10	21160497	21161063
chr10	21161187	21161426
chr10	21465384	21465527
chr10	21991860	21991942
chr10	21992749	21992811
chr10	22058613	22058925
chr10	22059122	22059300
chr10	22148246	22150116
chr10	22154314	22154479
chr10	22158457	22158723
chr10	23348083	23349852
chr10	23350033	23350466
chr10	24595757	24596061
chr10	24711601	24711638
chr10	25359652	25359906
chr10	26373644	26373887
chr10	29533446	29533755
chr10	29534311	29534835
chr10	29535468	29535818
chr10	30200211	30200683
chr10	30842729	30843334
chr10	30843494	30843679
chr10	30844156	30844456
chr10	31445771	31446026
chr10	32890836	32891039
chr10	34034021	34034257
chr10	34095819	34096004
chr10	34206454	34206638
chr10	36507344	36508308
chr10	39133915	39134159
chr10	39369383	39369728
chr10	39926638	39926823
chr10	39959389	39959606
chr10	40141810	40142490
chr10	40683732	40683793
chr10	41071115	41071286
chr10	41071510	41071582
chr10	41072084	41072376
chr10	41288901	41289011
chr10	41450821	41450833
chr10	41678886	41679072
chr10	41934963	41934974
chr10	42031242	42031562
chr10	42274700	42275051
chr10	42572747	42572949
chr10	42579377	42579643
chr10	42580140	42580616
chr10	42582000	42582171
chr10	42582224	42583234
chr10	42584899	42585002
chr10	42591138	42591844
chr10	42614146	42614361
chr10	42632055	42632328
chr10	42633127	42633504
chr10	42636770	42636993
chr10	42690557	42690901
chr10	42957863	42958091
chr10	43020940	43021061
chr10	43222008	43222117
chr10	43452415	43452676
chr10	43478468	43478720
chr10	43541004	43541136
chr10	43578376	43578558
chr10	43579127	43579642
chr10	43580684	43581166
chr10	43723409	43723834
chr10	44003458	44004508
chr10	44149001	44149267
chr10	44457058	44457520
chr10	44457705	44458214
chr10	44458424	44459082
chr10	44459215	44459633
chr10	44527043	44527432
chr10	44528883	44530107
chr10	45335922	45336123
chr10	45473788	45473993
chr10	45486968	45487155
chr10	45577655	45577778
chr10	45578467	45578610
chr10	50893117	50893351
chr10	50893653	50893897
chr10	50893981	50894875
chr10	50895202	50895743
chr10	50895791	50896279
chr10	50896319	50896548
chr10	50897378	50898509
chr10	50899942	50900514
chr10	50901583	50902058
chr10	50902393	50902466
chr10	50902586	50902658
chr10	50903470	50903713
chr10	51677839	51678206
chr10	52022031	52022236
chr10	52022452	52023039
chr10	52027500	52027932
chr10	52233023	52233208
chr10	52234305	52234377
chr10	53629344	53629399
chr10	57486054	57486382
chr10	57743619	57743844
chr10	58812184	58812265
chr10	58813565	58813907
chr10	58814130	58814263
chr10	58814421	58814611
chr10	59223170	59223380
chr10	59503983	59504205
chr10	59702405	59702572
chr10	60191814	60192124
chr10	60219357	60219433
chr10	60346735	60346911
chr10	60687406	60687894
chr10	60831518	60831791
chr10	60893925	60893934
chr10	61273066	61273293
chr10	61381227	61381297
chr10	61418425	61418664
chr10	61475388	61475824
chr10	61595154	61595339
chr10	61626028	61626068
chr10	61696537	61696774
chr10	62109561	62109670
chr10	62590289	62590393
chr10	62886251	62886515
chr10	62947305	62947425
chr10	63387110	63387219
chr10	63429514	63429628
chr10	66853272	66853503
chr10	66921525	66921688
chr10	67126472	67126556
chr10	67535500	67536423
chr10	67536620	67536917
chr10	67536985	67537317
chr10	67537835	67537883
chr10	67538558	67539186
chr10	67836268	67836418
chr10	67979909	67980078
chr10	68283230	68283346
chr10	69352716	69353098
chr10	69398691	69399129
chr10	69399250	69399641
chr10	70244503	70244689
chr10	70244784	70245022
chr10	70296879	70297171
chr10	71159572	71159649
chr10	71348633	71348852
chr10	71857593	71857601
chr10	73098167	73098293
chr10	74920828	74920976
chr10	74925417	74925693
chr10	75059550	75059770
chr10	75316931	75317515
chr10	75586013	75586347
chr10	75773353	75773358
chr10	75780830	75781054
chr10	75893424	75893798
chr10	75937494	75937620
chr10	75950816	75950955
chr10	75951223	75951249
chr10	75951767	75952005
chr10	76442826	76443199
chr10	76531387	76531568
chr10	76961893	76962101
chr10	77021537	77021695
chr10	77259927	77259930
chr10	77901417	77901525
chr10	78018882	78019181
chr10	78069370	78069873
chr10	78413309	78413330
chr10	78482625	78482657
chr10	78487697	78487844
chr10	79533804	79533819
chr10	79612314	79612558
chr10	79614027	79614151
chr10	79639045	79639145
chr10	79681126	79681185
chr10	79681940	79682235
chr10	79706996	79707539
chr10	79746547	79746777
chr10	79779805	79780210
chr10	79780317	79780438
chr10	79780516	79780749
chr10	79917600	79917603
chr10	79921424	79921935
chr10	79959872	79960061
chr10	79970723	79970942
chr10	79988520	79988868
chr10	79996373	79996458
chr10	80039649	80040036
chr10	80040297	80040322
chr10	80074995	80075432
chr10	80114674	80115038
chr10	80115409	80115797
chr10	80116354	80116381
chr10	80159900	80160115
chr10	80259702	80259923
chr10	80329876	80330061
chr10	80330197	80330474
chr10	80348446	80348718
chr10	80356880	80357031
chr10	80434097	80434162
chr10	80475201	80475336
chr10	80495279	80495709
chr10	80495930	80496254
chr10	80566476	80566610
chr10	80589745	80589767
chr10	80622511	80622752
chr10	80676280	80676304
chr10	80676546	80676595
chr10	80742376	80742448
chr10	80806125	80806418
chr10	80826369	80826598
chr10	80828120	80828360
chr10	80854157	80854556
chr10	80899104	80899233
chr10	80899566	80899751
chr10	80917443	80917524
chr10	80929877	80930108
chr10	80930333	80930752
chr10	80930834	80931217
chr10	80931807	80931812
chr10	80932294	80932906
chr10	80939559	80939957
chr10	80985913	80986032
chr10	81014888	81015234
chr10	81022184	81022232
chr10	81037345	81037757
chr10	81069913	81070134
chr10	81106687	81106796
chr10	81182788	81182850
chr10	81234148	81234199
chr10	81267987	81268166
chr10	81292789	81292903
chr10	81319313	81319469
chr10	81342996	81343227
chr10	81346741	81347109
chr10	81349987	81350048
chr10	81350326	81350632
chr10	81357362	81357563
chr10	81378491	81378816
chr10	81431720	81431851
chr10	81464278	81464632
chr10	81502724	81503245
chr10	81543375	81543612
chr10	81545138	81545415
chr10	81561616	81561724
chr10	81564329	81564405
chr10	81571628	81572083
chr10	81600855	81601053
chr10	81642093	81642195
chr10	81997091	81997275
chr10	82083957	82083973
chr10	82699728	82699850
chr10	82763874	82764306
chr10	82811909	82812479
chr10	83049024	83049063
chr10	83360786	83360825
chr10	83722534	83722884
chr10	83723478	83723484
chr10	83820042	83820150
chr10	84437511	84437542
chr10	84576151	84576175
chr10	84759258	84759371
chr10	85128039	85128285
chr10	85916989	85917237
chr10	85928475	85928804
chr10	86636937	86637380
chr10	87494692	87495010
chr10	87860183	87860389
chr10	88146757	88146977
chr10	88357091	88357394
chr10	88376804	88377068
chr10	89443268	89444014
chr10	91082798	91083046
chr10	91170674	91170745
chr10	91271236	91271463
chr10	92722894	92722917
chr10	93081656	93081803
chr10	93160337	93160663
chr10	93291644	93291652
chr10	93539853	93540069
chr10	93594030	93594038
chr10	93640757	93640901
chr10	93642064	93642303
chr10	93833622	93834392
chr10	94584923	94585061
chr10	94945761	94945808
chr10	95324265	95324271
chr10	95414378	95414588
chr10	95414669	95415217
chr10	95415575	95415691
chr10	95416608	95416928
chr10	95417546	95417821
chr10	95502062	95502104
chr10	99084821	99085138
chr10	100487300	100487560
chr10	100487863	100487951
chr10	103028329	103028791
chr10	103236203	103236435
chr10	108332110	108333454
chr10	109664847	109664895
chr10	110744930	110745115
chr10	110745294	110745761
chr10	110920454	110920639
chr10	111108998	111109074
chr10	111165816	111165994
chr10	111972607	111972710
chr10	112272334	112272358
chr10	114800426	114800450
chr10	115586084	115586709
chr10	115586804	115588082
chr10	116197344	116197397
chr10	116472894	116473129
chr10	116474057	116474104
chr10	116474347	116474551
chr10	116949692	116949782
chr10	116950553	116950729
chr10	117224046	117224073
chr10	117435495	117435673
chr10	117629113	117630052
chr10	118141370	118141947
chr10	118370427	118370530
chr10	118641162	118641173
chr10	119454588	119454877
chr10	119691661	119691682
chr10	119692308	119692552
chr10	120201312	120202310
chr10	120209138	120209183
chr10	120227500	120227594
chr10	120474574	120474776
chr10	120475002	120476370
chr10	120476508	120477366
chr10	120477514	120477817
chr10	120551995	120552186
chr10	120552347	120553199
chr10	120898416	120898518
chr10	120898902	120899052
chr10	121033281	121034547
chr10	121297360	121297598
chr10	121350970	121351505
chr10	121365887	121366199
chr10	121475531	121475559
chr10	121533247	121533432
chr10	121641481	121642765
chr10	121740336	121740451
chr10	122047916	122048074
chr10	122448616	122449576
chr10	123263959	123264056
chr10	125965941	125966273
chr10	126330644	126330728
chr10	126869689	126869888
chr10	127030797	127031010
chr10	127064708	127064809
chr10	127091173	127091723
chr10	127170547	127171152
chr10	127177607	127178244
chr10	127178417	127178629
chr10	127267523	127267574
chr10	127326460	127326977
chr10	127342525	127342748
chr10	127508900	127508921
chr10	127512901	127513526
chr10	127521950	127522071
chr10	127526582	127526820
chr10	127533950	127534445
chr10	127642036	127642158
chr10	127676828	127677869
chr10	127739072	127739443
chr10	127739579	127739594
chr10	128014985	128015307
chr10	128091151	128091185
chr10	128096685	128096892
chr10	128212851	128213036
chr10	128270342	128270573
chr10	128378553	128378774
chr10	128458528	128458543
chr10	128524738	128524923
chr10	128525456	128525781
chr10	128525783	128526542
chr10	128589609	128589839
chr10	128589939	128590672
chr10	128696316	128696588
chr10	128704666	128705022
chr10	128744407	128744594
chr10	128744753	128744939
chr10	128821442	128821932
chr10	128891476	128891531
chr10	128895725	128895752
chr10	128933984	128934180
chr11	3193330	3193534
chr11	3202650	3202654
chr11	3203028	3203065
chr11	3203227	3203274
chr11	3517618	3517756
chr11	3539092	3539287
chr11	3863061	3863485
chr11	3914743	3914772
chr11	4218138	4218251
chr11	4745896	4746410
chr11	4746925	4747059
chr11	4849479	4849972
chr11	4946988	4947187
chr11	4986776	4986834
chr11	5057781	5058238
chr11	5058435	5058616
chr11	5061434	5061943
chr11	5065773	5065781
chr11	5261719	5262285
chr11	5443759	5444016
chr11	5444790	5445403
chr11	5523310	5523495
chr11	5707711	5707815
chr11	6063513	6063828
chr11	6266708	6266940
chr11	6444541	6444795
chr11	6475733	6475736
chr11	7063672	7064142
chr11	8624109	8624253
chr11	8664497	8664677
chr11	9048484	9048800
chr11	11462580	11462659
chr11	11685825	11686083
chr11	11686228	11686413
chr11	11808682	11809108
chr11	12037663	12037783
chr11	16261393	16261570
chr11	16507402	16507475
chr11	16752235	16752433
chr11	16752792	16752998
chr11	16951132	16951574
chr11	17211206	17211226
chr11	18751528	18751581
chr11	18871316	18872096
chr11	18877026	18877432
chr11	18877753	18878057
chr11	19015538	19016126
chr11	19021021	19021189
chr11	19026784	19027764
chr11	19919522	19919593
chr11	20112724	20112976
chr11	20400963	20401035
chr11	20455067	20455789
chr11	20631339	20631341
chr11	21993286	21993684
chr11	21996501	21997099
chr11	22000881	22003119
chr11	22003413	22003556
chr11	22617393	22617489
chr11	22860599	22860729
chr11	22973927	22974124
chr11	23255552	23255839
chr11	23895293	23895321
chr11	24049227	24049783
chr11	24077244	24077543
chr11	25645388	25645594
chr11	25862880	25862976
chr11	26210991	26211010
chr11	26593626	26593709
chr11	28339688	28339727
chr11	29515327	29515475
chr11	29692704	29692899
chr11	30197601	30197719
chr11	30198598	30198688
chr11	30754825	30754899
chr11	31368440	31370370
chr11	31965719	31966118
chr11	32205186	32205394
chr11	32205691	32205742
chr11	32221497	32221528
chr11	32268196	32268198
chr11	32286757	32287364
chr11	32299990	32300348
chr11	32324704	32324743
chr11	32455953	32456177
chr11	32532401	32532622
chr11	32532781	32532819
chr11	32533864	32533884
chr11	33146683	33146758
chr11	33147724	33147780
chr11	33148012	33148472
chr11	33203546	33203564
chr11	33203650	33203704
chr11	33512755	33512847
chr11	33513867	33514036
chr11	34832769	34832988
chr11	34833166	34833718
chr11	34834159	34834265
chr11	35121025	35121267
chr11	35980572	35980811
chr11	36001428	36001473
chr11	36045827	36045841
chr11	36221377	36221465
chr11	40733547	40733642
chr11	43426063	43426119
chr11	43528432	43528514
chr11	43529190	43529391
chr11	43681649	43681874
chr11	43747381	43747512
chr11	43766958	43767206
chr11	43836503	43836726
chr11	44611021	44611959
chr11	44612906	44613430
chr11	44616813	44617350
chr11	44619803	44620096
chr11	45008115	45008332
chr11	45926562	45927077
chr11	45944060	45944214
chr11	45944792	45945070
chr11	45955144	45955211
chr11	45955567	45955582
chr11	45980020	45980355
chr11	45980515	45981153
chr11	48788725	48788910
chr11	48801210	48801395
chr11	48815703	48816086
chr11	48826351	48826356
chr11	48854147	48854612
chr11	48856326	48857067
chr11	48858342	48858621
chr11	49245332	49245576
chr11	49609185	49610027
chr11	49794186	49794554
chr11	49794903	49795115
chr11	49901289	49902039
chr11	49902597	49902657
chr11	50236643	50237596
chr11	50603122	50603616
chr11	50769353	50769599
chr11	50851370	50851577
chr11	50887132	50887187
chr11	51289579	51289838
chr11	51290284	51290524
chr11	51755613	51755726
chr11	52167417	52167584
chr11	52167824	52168650
chr11	52282803	52283065
chr11	52764373	52764436
chr11	52765700	52766094
chr11	53463293	53464063
chr11	53478498	53478712
chr11	53486964	53487122
chr11	53487594	53487625
chr11	53636212	53636416
chr11	53706710	53706818
chr11	53859442	53859495
chr11	53891789	53891962
chr11	53979643	53979686
chr11	55077495	55077668
chr11	55098766	55098813
chr11	55204187	55204295
chr11	55469286	55469682
chr11	55608258	55608708
chr11	57549182	57549237
chr11	57800982	57801647
chr11	57802573	57802673
chr11	57827422	57827561
chr11	57827656	57828434
chr11	57828996	57829353
chr11	57934488	57934730
chr11	57963384	57963472
chr11	58008734	58008826
chr11	58103279	58103336
chr11	58168005	58168121
chr11	58172303	58172334
chr11	58329671	58329695
chr11	58846940	58847176
chr11	58928177	58928434
chr11	58937420	58937696
chr11	58937856	58937908
chr11	58977231	58977590
chr11	58978623	58978737
chr11	58994322	58994536
chr11	59209249	59209363
chr11	59307056	59307479
chr11	59307558	59308033
chr11	59471638	59471721
chr11	59472600	59472665
chr11	59662369	59662530
chr11	59787886	59787887
chr11	59948830	59948919
chr11	59963910	59964193
chr11	59965350	59965474
chr11	60352931	60353328
chr11	60538741	60539361
chr11	60778165	60778196
chr11	60810988	60811254
chr11	60927468	60927577
chr11	61023052	61023082
chr11	61146976	61147013
chr11	61147335	61147520
chr11	61175135	61175338
chr11	61452258	61452406
chr11	61505984	61506027
chr11	61579721	61579781
chr11	61620584	61620610
chr11	61762086	61762310
chr11	61956611	61956778
chr11	61957607	61957692
chr11	62076795	62076931
chr11	62538368	62538562
chr11	62552273	62552734
chr11	62603910	62604146
chr11	62613708	62614009
chr11	62648673	62648743
chr11	62675821	62676042
chr11	62756634	62757365
chr11	62788706	62788895
chr11	62789833	62790019
chr11	63920442	63920842
chr11	63921021	63921502
chr11	63921599	63922942
chr11	63923373	63923818
chr11	63925097	63925465
chr11	64435077	64435530
chr11	64435720	64435929
chr11	64436094	64436696
chr11	64978708	64979023
chr11	65162994	65163127
chr11	66167985	66168005
chr11	66168481	66168704
chr11	66525142	66525370
chr11	66525522	66525864
chr11	66526293	66526951
chr11	66527031	66527244
chr11	66984385	66984535
chr11	66984957	66985191
chr11	67024844	67025317
chr11	67052990	67053077
chr11	67454890	67455112
chr11	67921654	67921816
chr11	67922122	67922390
chr11	67966103	67966120
chr11	68384610	68385471
chr11	68385670	68386174
chr11	68386716	68386924
chr11	68400073	68400331
chr11	68431889	68432287
chr11	68900937	68901209
chr11	68901287	68901599
chr11	69037468	69037483
chr11	69038753	69038938
chr11	69041859	69041916
chr11	69045665	69046119
chr11	69110320	69110561
chr11	69121378	69121648
chr11	69326069	69326341
chr11	69340245	69340251
chr11	69396772	69396942
chr11	69547637	69547708
chr11	69672472	69672686
chr11	69795484	69795653
chr11	69795896	69795915
chr11	69800120	69800131
chr11	69800905	69801034
chr11	69801232	69801394
chr11	69802398	69802477
chr11	69802943	69803072
chr11	69803203	69803373
chr11	69803933	69804168
chr11	69920028	69920070
chr11	69921428	69921490
chr11	69921594	69921756
chr11	69934373	69934576
chr11	69935248	69936370
chr11	69965348	69965727
chr11	70015471	70015497
chr11	70214788	70214911
chr11	70228824	70229396
chr11	70230365	70230631
chr11	70410264	70410362
chr11	70655706	70656328
chr11	70777200	70777314
chr11	71019284	71019538
chr11	72041965	72042331
chr11	72266385	72266574
chr11	72314281	72314621
chr11	72411141	72411464
chr11	72689409	72689907
chr11	73137603	73138804
chr11	73160349	73160631
chr11	74522203	74522504
chr11	74547522	74547605
chr11	74610580	74610750
chr11	74770215	74770217
chr11	74771555	74771616
chr11	75168531	75168648
chr11	75169221	75169393
chr11	75169496	75169615
chr11	75190392	75190686
chr11	75193332	75193664
chr11	75193748	75195143
chr11	75195705	75195756
chr11	75234955	75235112
chr11	75282433	75282644
chr11	75348301	75348508
chr11	75454106	75454137
chr11	75461412	75461625
chr11	75510104	75510154
chr11	75510736	75511118
chr11	75530510	75530542
chr11	75630772	75631050
chr11	75967213	75967261
chr11	76027598	76027738
chr11	76178808	76178916
chr11	76399655	76399837
chr11	76647595	76647722
chr11	76672542	76672569
chr11	76672985	76673183
chr11	76997378	76997659
chr11	76997940	76998402
chr11	76998644	76998837
chr11	77348087	77348272
chr11	77348675	77348810
chr11	77462188	77462746
chr11	77467810	77467939
chr11	77487394	77487424
chr11	77493263	77493285
chr11	77508140	77508270
chr11	77513360	77513365
chr11	77513614	77513903
chr11	77515101	77516045
chr11	77931795	77931983
chr11	78176449	78176547
chr11	78301756	78302035
chr11	78360524	78360658
chr11	78465288	78465387
chr11	78698194	78698207
chr11	78827771	78827865
chr11	79710861	79711094
chr11	79711691	79712042
chr11	79973775	79973946
chr11	79974166	79974552
chr11	79992396	79992637
chr11	79993937	79994074
chr11	80089276	80089603
chr11	80089693	80089760
chr11	80154150	80154406
chr11	80154779	80154870
chr11	80208955	80209060
chr11	80429459	80429491
chr11	80779474	80779498
chr11	80780160	80780370
chr11	81154102	81154198
chr11	81588640	81588641
chr11	81613521	81613538
chr11	82434588	82434797
chr11	82871163	82871398
chr11	82890620	82890766
chr11	82907588	82907790
chr11	82908365	82908528
chr11	82930452	82933220
chr11	82971281	82971330
chr11	83418673	83418999
chr11	83850010	83850095
chr11	84066021	84066217
chr11	84519115	84519244
chr11	84519820	84520560
chr11	84521055	84521512
chr11	84521762	84523252
chr11	84523480	84525030
chr11	84525442	84527219
chr11	84527653	84527883
chr11	84794475	84794776
chr11	84880883	84881228
chr11	85170247	85170401
chr11	85183016	85183100
chr11	85312312	85312474
chr11	85353660	85353737
chr11	85829982	85830626
chr11	85832536	85832766
chr11	85833323	85833572
chr11	85833884	85834103
chr11	85841788	85842272
chr11	85843227	85844917
chr11	85925307	85925705
chr11	86358390	86358456
chr11	86807708	86807917
chr11	86894256	86894480
chr11	87086310	87086356
chr11	87108992	87109237
chr11	87639558	87639589
chr11	87662599	87662741
chr11	87737185	87737455
chr11	87967807	87968069
chr11	88823159	88823211
chr11	88863561	88863622
chr11	88865464	88865466
chr11	88999884	88999980
chr11	89060735	89060937
chr11	89100671	89100837
chr11	89301378	89301918
chr11	89303532	89303745
chr11	90170054	90170188
chr11	90485062	90485203
chr11	90697619	90697788
chr11	93471856	93471972
chr11	93763405	93763604
chr11	94133425	94133448
chr11	94211313	94211401
chr11	94474339	94474542
chr11	94548051	94548062
chr11	94629546	94629762
chr11	94653590	94653654
chr11	94677743	94677811
chr11	94936492	94937565
chr11	95120131	95120468
chr11	95120662	95120915
chr11	95121418	95121672
chr11	95143166	95143456
chr11	95144917	95145590
chr11	95145722	95146391
chr11	95258618	95258759
chr11	95259814	95259912
chr11	95337427	95337577
chr11	95384224	95384462
chr11	95513296	95514933
chr11	95520672	95520915
chr11	95521233	95521633
chr11	95586201	95586828
chr11	95587186	95587662
chr11	95796508	95796957
chr11	95823762	95824024
chr11	95825204	95825233
chr11	95830908	95831315
chr11	95990870	95990936
chr11	95991797	95991851
chr11	96004668	96004981
chr11	96034524	96034535
chr11	96075678	96076117
chr11	96124440	96124449
chr11	96284370	96284617
chr11	96407656	96407912
chr11	96777497	96777861
chr11	96916436	96916809
chr11	96988068	96988101
chr11	96997587	96997603
chr11	97018270	97018523
chr11	97018712	97018935
chr11	97021872	97022627
chr11	97025795	97026227
chr11	97281168	97281300
chr11	97310354	97310569
chr11	97451635	97451825
chr11	97532290	97532534
chr11	97537178	97537325
chr11	97575890	97576059
chr11	97628655	97630100
chr11	97630467	97630469
chr11	97661100	97661838
chr11	97742947	97743206
chr11	97883461	97883463
chr11	97994785	97995066
chr11	98052049	98052260
chr11	98052979	98053166
chr11	98150534	98150645
chr11	98201693	98201943
chr11	98204332	98204356
chr11	98327199	98328875
chr11	98338377	98338574
chr11	98338822	98338950
chr11	98342336	98342756
chr11	98349032	98349148
chr11	98412471	98412542
chr11	98438902	98439127
chr11	98458139	98458217
chr11	98545512	98546107
chr11	98550614	98550761
chr11	98551585	98551714
chr11	98586614	98586617
chr11	98673103	98673316
chr11	98682174	98682596
chr11	98770763	98770866
chr11	98789063	98789107
chr11	98789296	98789481
chr11	98836588	98836869
chr11	98907605	98907836
chr11	98936705	98936764
chr11	98940765	98940995
chr11	98959673	98959799
chr11	98960330	98960433
chr11	98960561	98960830
chr11	99024041	99024271
chr11	99040906	99041484
chr11	100397893	100397978
chr11	100472735	100473056
chr11	100622734	100622865
chr11	100758817	100759049
chr11	100760064	100760169
chr11	100860526	100860840
chr11	100958622	100959176
chr11	100959467	100959680
chr11	100983379	100983656
chr11	101067079	101067173
chr11	101083414	101083426
chr11	101095974	101096084
chr11	101173152	101173694
chr11	101177966	101178195
chr11	101260245	101260449
chr11	101260583	101261130
chr11	101278237	101278413
chr11	101279088	101279166
chr11	101302322	101302467
chr11	101425023	101425026
chr11	101442097	101442355
chr11	101551805	101551942
chr11	101667001	101667221
chr11	101732825	101732909
chr11	101784653	101785206
chr11	101814868	101814934
chr11	101963317	101963370
chr11	101963755	101963831
chr11	101964102	101964420
chr11	102061352	102061572
chr11	102097178	102097324
chr11	102138426	102138586
chr11	102145781	102145843
chr11	102147402	102147565
chr11	102156430	102156620
chr11	102308822	102309782
chr11	102431097	102431277
chr11	102438887	102438914
chr11	102604309	102604481
chr11	102605313	102605784
chr11	102606037	102606442
chr11	102739294	102739359
chr11	102774027	102774131
chr11	102774645	102774749
chr11	102817957	102818824
chr11	102819019	102819257
chr11	102819364	102819923
chr11	102893029	102893234
chr11	102925194	102925359
chr11	102946689	102946874
chr11	102948513	102948788
chr11	102989837	102990486
chr11	103017079	103017263
chr11	103101282	103101441
chr11	103102770	103103089
chr11	103103458	103103459
chr11	103193093	103193134
chr11	103266782	103266818
chr11	103332681	103332858
chr11	103333814	103334235
chr11	103359129	103359397
chr11	103360246	103360424
chr11	103360838	103361036
chr11	103362353	103362509
chr11	103412171	103412272
chr11	103650221	103650467
chr11	103809361	103809640
chr11	103966619	103966674
chr11	104131853	104132201
chr11	104133167	104133921
chr11	104157676	104157731
chr11	104195813	104195952
chr11	104607867	104608018
chr11	105126733	105126892
chr11	105180287	105180519
chr11	105292646	105292831
chr11	105347806	105347948
chr11	105967390	105967620
chr11	106032228	106032384
chr11	106035973	106036091
chr11	106084130	106084560
chr11	106158718	106158939
chr11	106272890	106273194
chr11	106273648	106273766
chr11	106487145	106487345
chr11	106487775	106487962
chr11	106613798	106613856
chr11	106919642	106919720
chr11	107012844	107012988
chr11	107025531	107025691
chr11	107132506	107132773
chr11	107189372	107189540
chr11	107546713	107546844
chr11	108378187	108378219
chr11	108425072	108425275
chr11	108425562	108425722
chr11	109011726	109012037
chr11	109296859	109297426
chr11	109298281	109298439
chr11	109472117	109472375
chr11	109611583	109611902
chr11	110379726	110379852
chr11	110398823	110398912
chr11	110537725	110537940
chr11	112784630	112784952
chr11	113165172	113165342
chr11	113201856	113202034
chr11	113326547	113326724
chr11	113565227	113565483
chr11	113565658	113566015
chr11	113618650	113619034
chr11	113619124	113619314
chr11	114064723	114064868
chr11	114065689	114065874
chr11	114065969	114066643
chr11	114636609	114636663
chr11	114668386	114668574
chr11	114675377	114675435
chr11	114745148	114745406
chr11	114786256	114786584
chr11	114851365	114851636
chr11	115153862	115154017
chr11	115163144	115163376
chr11	115249893	115250616
chr11	115265382	115265737
chr11	115266497	115266511
chr11	115321948	115322199
chr11	115322398	115322583
chr11	115514404	115514629
chr11	115563667	115563723
chr11	115602697	115602966
chr11	115604900	115604957
chr11	115628226	115628439
chr11	115814406	115814821
chr11	115815266	115815338
chr11	115823973	115824219
chr11	115824450	115824677
chr11	115859549	115860029
chr11	116004966	116005195
chr11	116012858	116012874
chr11	116024589	116024607
chr11	116110087	116110440
chr11	116222312	116222886
chr11	116281353	116281860
chr11	116319154	116319198
chr11	116319601	116319683
chr11	116434000	116434153
chr11	116531421	116531789
chr11	116531910	116532228
chr11	116532337	116534090
chr11	116581515	116581762
chr11	116643465	116643469
chr11	116652869	116652920
chr11	116657500	116657507
chr11	116672463	116672635
chr11	116885462	116885593
chr11	116906107	116906292
chr11	116913724	116913945
chr11	116918476	116918551
chr11	117267310	117267509
chr11	117385177	117385293
chr11	117611167	117611299
chr11	117611304	117611366
chr11	117780609	117780798
chr11	117809650	117809658
chr11	117824551	117824701
chr11	117849209	117849471
chr11	117968261	117968630
chr11	117970026	117970175
chr11	118288611	118288807
chr11	118353210	118353395
chr11	118476813	118477001
chr11	118569118	118569303
chr11	118569527	118569579
chr11	119022678	119023002
chr11	119023126	119023171
chr11	119023683	119023836
chr11	119034381	119034660
chr11	119037241	119037405
chr11	119041758	119042006
chr11	119053027	119054585
chr11	119055576	119055886
chr11	119057220	119057575
chr11	119058205	119058302
chr11	119086741	119086987
chr11	119089929	119090722
chr11	119090851	119091660
chr11	119300707	119300731
chr11	119389979	119389988
chr11	119515014	119515192
chr11	119524647	119524946
chr11	119548390	119549116
chr11	119549634	119549827
chr11	120169271	120169752
chr11	120232440	120232511
chr11	120232609	120232938
chr11	120492531	120492756
chr11	120624443	120624528
chr11	120633981	120634084
chr11	120659062	120659370
chr11	120660395	120660538
chr11	120660584	120661001
chr11	120661018	120661142
chr11	120672722	120672786
chr11	120720663	120720720
chr11	120785122	120785214
chr11	120795833	120795911
chr11	120948875	120949060
chr11	120950719	120951106
chr11	121238563	121238748
chr11	121259856	121260041
chr11	121355311	121355372
chr11	121388220	121388445
chr12	3234857	3234858
chr12	3367337	3367441
chr12	3571910	3571933
chr12	4840821	4841006
chr12	4843070	4843360
chr12	4843645	4843924
chr12	5119727	5119989
chr12	5410662	5410671
chr12	7978553	7978712
chr12	8297981	8298267
chr12	8298389	8298857
chr12	8301524	8301924
chr12	8313305	8313364
chr12	8770893	8771093
chr12	8771598	8772322
chr12	9570111	9570321
chr12	9570596	9570851
chr12	9574429	9574803
chr12	9584828	9585158
chr12	10390612	10390628
chr12	11149257	11149504
chr12	11150170	11150195
chr12	11150356	11150738
chr12	11196214	11196399
chr12	11265666	11265688
chr12	11438026	11438030
chr12	11438198	11438301
chr12	11456041	11456079
chr12	12420951	12421071
chr12	12939436	12939646
chr12	12940196	12940500
chr12	12942530	12943048
chr12	13268576	13268718
chr12	14151970	14152389
chr12	16509389	16509518
chr12	16800304	16800402
chr12	16811751	16811957
chr12	17000010	17000408
chr12	17175178	17175452
chr12	17267036	17267129
chr12	17324527	17325142
chr12	17690474	17690527
chr12	17691568	17691834
chr12	17993168	17993406
chr12	19288779	19288989
chr12	19388116	19388403
chr12	20196895	20197197
chr12	20614826	20615155
chr12	20615428	20615636
chr12	20990966	20991066
chr12	21111064	21111185
chr12	21285616	21285630
chr12	22905852	22906196
chr12	22906475	22906665
chr12	23010308	23010502
chr12	23189166	23189391
chr12	24096950	24097248
chr12	24251841	24252431
chr12	24571945	24572469
chr12	24652355	24652378
chr12	24708013	24708831
chr12	25092457	25092477
chr12	27342609	27342897
chr12	28634590	28634775
chr12	28636391	28636606
chr12	28751227	28751243
chr12	28752210	28752261
chr12	29938682	29938816
chr12	30373346	30373597
chr12	30583718	30583888
chr12	30585149	30585230
chr12	30884252	30884575
chr12	30912003	30912402
chr12	31073621	31073825
chr12	31074060	31074595
chr12	31074686	31075143
chr12	31265279	31265567
chr12	31265701	31266220
chr12	31351454	31351730
chr12	31558964	31559953
chr12	32291999	32292416
chr12	32910582	32910756
chr12	32910801	32911091
chr12	33147442	33147716
chr12	33379963	33380427
chr12	33928804	33928874
chr12	33957381	33957698
chr12	33957888	33958133
chr12	33958213	33958806
chr12	34906490	34906499
chr12	35534151	35534399
chr12	35896373	35896451
chr12	37109096	37109704
chr12	38778692	38778732
chr12	39956502	39956531
chr12	40133612	40134061
chr12	40445734	40446015
chr12	41023781	41023869
chr12	44221658	44221776
chr12	44222258	44222347
chr12	46819429	46819477
chr12	49383654	49383748
chr12	49383930	49383936
chr12	49385115	49385454
chr12	50649097	50649099
chr12	50943793	50943860
chr12	51592988	51593285
chr12	51593714	51594127
chr12	54203459	54203982
chr12	54719706	54719727
chr12	54984767	54985456
chr12	54985584	54985859
chr12	54986264	54986656
chr12	55155534	55155753
chr12	55230593	55230756
chr12	55599023	55599187
chr12	55599894	55599904
chr12	55600497	55600751
chr12	55821186	55821279
chr12	56519486	56520132
chr12	56520887	56521134
chr12	56524682	56524745
chr12	56525397	56525644
chr12	56532951	56533179
chr12	56533436	56533727
chr12	56534444	56535049
chr12	56535649	56535974
chr12	56536300	56536916
chr12	56537146	56537568
chr12	56611686	56612410
chr12	56612657	56613225
chr12	56637069	56637311
chr12	56681333	56681397
chr12	56695310	56695789
chr12	56696942	56697033
chr12	57211630	57211865
chr12	57538781	57539275
chr12	57544876	57546158
chr12	57546314	57546540
chr12	64917621	64917956
chr12	65172367	65172591
chr12	69168871	69169295
chr12	69196692	69197142
chr12	69361413	69361605
chr12	69364139	69364252
chr12	69757846	69758031
chr12	69986439	69986475
chr12	70112237	70112381
chr12	70192644	70192776
chr12	70430483	70430565
chr12	70680336	70680341
chr12	71015690	71015964
chr12	72441786	72441962
chr12	72461770	72461872
chr12	72821346	72821518
chr12	72832267	72832325
chr12	72854615	72854646
chr12	72917338	72918088
chr12	72939604	72939981
chr12	72943738	72944041
chr12	72946182	72946234
chr12	73044419	73046994
chr12	73053308	73054553
chr12	73111658	73112261
chr12	73112359	73112437
chr12	73112742	73113101
chr12	73287580	73287682
chr12	73545744	73546110
chr12	73584088	73584155
chr12	73585342	73585792
chr12	73794245	73794411
chr12	73949792	73950014
chr12	73965406	73965417
chr12	73998400	73998412
chr12	74283862	74284046
chr12	75669450	75669762
chr12	75736141	75736201
chr12	75818055	75818275
chr12	75818848	75818929
chr12	76177021	76177737
chr12	76404228	76404566
chr12	76404892	76406297
chr12	76533008	76533547
chr12	76821004	76821116
chr12	76838303	76838432
chr12	76962247	76962516
chr12	78056057	78056242
chr12	79089791	79089796
chr12	79191842	79192164
chr12	79297184	79297348
chr12	80112961	80113063
chr12	80642752	80643087
chr12	80692644	80693023
chr12	80757668	80758161
chr12	80758333	80758534
chr12	80758554	80758766
chr12	80758901	80758932
chr12	80760717	80760817
chr12	80895096	80895363
chr12	80946621	80946650
chr12	81026732	81026763
chr12	81027358	81027373
chr12	81780358	81780441
chr12	81859864	81860036
chr12	82339172	82339181
chr12	82470053	82470114
chr12	82616699	82616888
chr12	82617714	82617793
chr12	83770909	83771030
chr12	83921902	83922214
chr12	83951357	83951691
chr12	84069592	84069916
chr12	84417178	84417326
chr12	84417824	84417913
chr12	84589839	84590095
chr12	84590664	84590836
chr12	84617063	84617088
chr12	84617386	84617527
chr12	84698232	84698876
chr12	84773079	84773317
chr12	84970939	84971047
chr12	84996148	84996332
chr12	85151336	85151363
chr12	85219310	85219547
chr12	85220111	85220132
chr12	85305660	85305708
chr12	85474357	85474563
chr12	85474990	85475069
chr12	85487765	85487921
chr12	85698411	85698504
chr12	86242479	86242551
chr12	86402788	86402990
chr12	86421569	86422277
chr12	86422376	86422900
chr12	86726437	86726649
chr12	86878905	86879055
chr12	87146103	87146289
chr12	87299415	87299722
chr12	87300065	87300431
chr12	91383995	91384642
chr12	91384755	91384797
chr12	91400271	91400506
chr12	91779186	91779255
chr12	91849186	91849543
chr12	98735267	98735356
chr12	98737861	98737872
chr12	98899974	98900171
chr12	98901427	98901603
chr12	99392050	99392093
chr12	99393743	99393876
chr12	99883435	99883631
chr12	99964422	99964503
chr12	100725105	100725522
chr12	101718074	101718382
chr12	101819174	101819364
chr12	102283121	102283398
chr12	103241813	103242020
chr12	103242723	103243052
chr12	103325286	103325649
chr12	103388548	103388718
chr12	103532100	103532347
chr12	104472369	104472508
chr12	104472633	104473802
chr12	105009750	105010046
chr12	105032263	105032661
chr12	105338133	105338151
chr12	105476714	105476735
chr12	105960728	105960891
chr12	105962662	105963433
chr12	106010013	106010542
chr12	106478278	106478796
chr12	107980048	107980232
chr12	107998819	107998881
chr12	108002537	108002784
chr12	108002930	108003094
chr12	108003321	108003379
chr12	108006232	108006567
chr12	108179320	108179669
chr12	108180356	108180542
chr12	108274041	108274311
chr12	108275244	108275598
chr12	108277644	108277821
chr12	108305860	108305967
chr12	108306700	108306790
chr12	108333188	108333379
chr12	108333935	108334437
chr12	108334872	108334997
chr12	108607482	108607667
chr12	108757990	108758193
chr12	109054115	109054316
chr12	109446107	109446215
chr12	109538948	109539360
chr12	109542935	109543121
chr12	109543710	109543994
chr12	109545969	109546458
chr12	110277749	110277773
chr12	110278859	110279089
chr12	110447034	110447058
chr12	110447736	110447778
chr12	110737340	110737404
chr12	110843850	110844135
chr12	110844533	110844821
chr12	110845160	110845424
chr12	110978161	110978169
chr12	110979021	110979289
chr12	110991852	110991886
chr12	110992441	110992698
chr12	111274329	111274676
chr12	111275241	111275306
chr12	111413358	111413503
chr12	111425966	111426146
chr12	111485018	111485245
chr12	111539325	111539330
chr12	111678154	111678337
chr12	111813916	111814186
chr12	111908005	111908178
chr12	112130365	112130563
chr12	112130698	112130883
chr12	112144153	112144181
chr12	112144500	112144917
chr12	112145154	112145897
chr12	112146053	112146298
chr12	112517166	112517250
chr12	112619344	112619428
chr12	112645543	112645659
chr12	112674402	112674424
chr12	112675315	112675538
chr12	112678423	112678879
chr12	112679198	112679777
chr12	112706974	112707475
chr12	112721495	112721722
chr12	112721888	112722095
chr12	112723869	112723932
chr12	112802506	112802701
chr12	112875898	112875986
chr12	112877707	112877845
chr12	112927407	112927556
chr12	112928123	112928195
chr12	112930277	112930321
chr12	112999755	112999875
chr12	113014326	113014392
chr12	113099605	113099850
chr12	113156041	113156042
chr12	113156266	113156649
chr12	113188254	113188492
chr12	116049729	116049735
chr12	116404605	116404741
chr12	116404952	116405955
chr12	117157941	117158045
chr12	117534441	117534663
chr12	117843446	117844191
chr12	118198578	118198904
chr12	118457948	118458139
chr12	118836722	118837406
chr12	118846633	118847202
chr12	118847479	118847701
chr12	118847917	118848002
chr12	118848258	118849674
chr12	118850341	118850556
chr12	118854544	118855383
chr13	3358401	3358665
chr13	3359133	3361338
chr13	3610112	3610179
chr13	3611715	3611913
chr13	3893316	3893770
chr13	3917696	3917891
chr13	4942606	4942848
chr13	5865264	5865408
[truncated: 6,993 more rows]

## Sheet: ZFHX3 ONLY
chr	start	end
chr1	4491574	4491597
chr1	4492596	4492847
chr1	4493482	4493728
chr1	4496252	4496495
chr1	4496727	4497783
chr1	9630218	9630403
chr1	12644654	12644969
chr1	13124967	13126216
chr1	13126307	13127752
chr1	13127917	13128217
chr1	13128462	13128643
chr1	13134395	13134601
chr1	14113242	14113444
chr1	14504037	14504641
chr1	14504933	14505195
chr1	14505916	14506295
chr1	14507036	14507114
chr1	15264056	15264308
chr1	17123670	17123727
chr1	17389646	17389863
chr1	19109820	19110204
chr1	19207511	19207779
chr1	19208750	19209053
chr1	19209695	19210485
chr1	19211086	19211292
chr1	19214029	19214320
chr1	19233930	19234275
chr1	19236502	19236689
chr1	19240972	19241162
chr1	19241448	19241690
chr1	23359705	23359819
chr1	24137169	24137410
chr1	25082468	25082653
chr1	25120008	25120193
chr1	27180163	27180348
chr1	29737109	29737399
chr1	33174858	33174910
chr1	33739369	33739608
chr1	34602473	34602729
chr1	34793693	34793725
chr1	35076919	35077139
chr1	35388288	35388473
chr1	35814985	35815185
chr1	36254767	36254794
chr1	36273433	36273759
chr1	36303103	36303133
chr1	36307223	36307587
chr1	36600271	36600456
chr1	36635076	36635262
chr1	36684168	36684420
chr1	36784725	36784728
chr1	36847383	36847608
chr1	37239308	37239607
chr1	37419522	37419802
chr1	37678431	37678648
chr1	37743055	37743160
chr1	37985830	37986017
chr1	38241841	38242075
chr1	39010631	39010997
chr1	39012695	39012880
chr1	39251758	39251957
chr1	39530434	39530787
chr1	40264045	40264242
chr1	40378869	40379089
chr1	41891191	41891376
chr1	42258274	42258378
chr1	42704342	42704512
chr1	42915157	42915358
chr1	43139657	43139842
chr1	43264505	43264799
chr1	44951090	44951424
chr1	46449626	46449826
chr1	48093681	48093905
chr1	51615624	51615846
chr1	52113893	52114085
chr1	52170358	52170555
chr1	52399961	52400188
chr1	52598064	52598103
chr1	52648684	52648771
chr1	54734855	54734952
chr1	54789421	54789628
chr1	55482328	55482513
chr1	55659894	55660284
chr1	55874246	55874441
chr1	56974319	56974643
chr1	56975436	56976963
chr1	56977627	56978296
chr1	56978354	56978587
chr1	56979937	56980411
chr1	56980680	56980930
chr1	56981015	56981362
chr1	57608401	57608586
chr1	57782585	57782806
chr1	58328989	58329376
chr1	58341719	58341973
chr1	59316051	59316261
chr1	59508581	59508788
chr1	60793815	60794055
chr1	61140485	61140670
chr1	62701065	62701397
chr1	62929546	62929754
chr1	62964326	62964519
chr1	63249027	63249334
chr1	63249803	63250010
chr1	63259397	63260578
chr1	63260707	63261724
chr1	63263116	63263301
chr1	63263886	63264876
chr1	63266110	63266244
chr1	63266757	63267227
chr1	63267425	63267673
chr1	63267893	63268083
chr1	63268977	63269162
chr1	63272235	63272510
chr1	63277021	63277218
chr1	63475117	63475303
chr1	63494037	63494230
chr1	63953559	63953745
chr1	64965091	64965279
chr1	65010241	65010480
chr1	65243677	65243980
chr1	66227138	66227323
chr1	66401983	66402270
chr1	66895882	66895921
chr1	68625154	68625454
chr1	69689143	69689271
chr1	69834419	69834604
chr1	72002628	72002682
chr1	72142009	72142223
chr1	72878011	72878163
chr1	72993145	72993386
chr1	73826438	73826614
chr1	73901437	73902270
chr1	73902465	73902588
chr1	73926471	73926656
chr1	74027489	74027659
chr1	74287159	74287462
chr1	74389852	74390092
chr1	74390509	74390695
chr1	74395577	74395762
chr1	74748606	74748762
chr1	74787970	74788341
chr1	74792269	74792316
chr1	74806308	74806344
chr1	74808152	74808365
chr1	74883110	74883375
chr1	74892763	74892784
chr1	74893657	74893679
chr1	74900429	74900709
chr1	74948869	74949058
chr1	74950292	74950368
chr1	75244895	75245024
chr1	75245976	75246021
chr1	75251745	75251983
chr1	75253086	75253372
chr1	75317629	75317918
chr1	75385237	75385425
chr1	75402307	75402508
chr1	75445506	75445892
chr1	75509475	75509799
chr1	75548125	75548437
chr1	75559633	75560004
chr1	75652738	75652983
chr1	75926013	75926049
chr1	76460377	76460562
chr1	77506401	77506483
chr1	77708776	77708845
chr1	78140705	78141010
chr1	78187505	78187690
chr1	78189623	78189862
chr1	78192284	78192963
chr1	78193532	78194076
chr1	78195153	78195635
chr1	78195799	78196127
chr1	78196244	78196420
chr1	78197324	78197460
chr1	78199261	78199504
chr1	78200092	78200641
chr1	78201252	78201921
chr1	78202489	78202762
chr1	78202988	78203384
chr1	78210619	78211090
chr1	78212117	78212328
chr1	78213069	78213305
chr1	78215811	78215870
chr1	78218110	78218227
chr1	78525297	78525532
chr1	78821660	78821934
chr1	82288983	82289078
chr1	84581866	84582290
chr1	84696659	84696793
chr1	84697091	84697510
chr1	85853286	85853627
chr1	85853810	85853815
chr1	86053187	86053441
chr1	86178865	86179406
chr1	86214241	86214557
chr1	86500877	86501928
chr1	86532399	86532874
chr1	87042123	87042308
chr1	87164441	87164594
chr1	87174441	87174897
chr1	87187249	87187300
chr1	87246123	87246556
chr1	87583710	87583966
chr1	87721180	87721444
chr1	87721551	87721774
chr1	88144414	88144603
chr1	88330985	88331132
chr1	88357496	88357749
chr1	88455882	88456067
chr1	88562284	88562772
chr1	88705120	88705310
chr1	88745261	88745740
chr1	89351002	89351337
chr1	89382083	89382331
chr1	89589670	89589943
chr1	89671158	89671589
chr1	89673180	89673419
chr1	89714204	89714395
chr1	89734409	89734700
chr1	89848347	89848593
chr1	89926816	89927657
chr1	89928348	89929109
chr1	89929214	89929633
chr1	89929985	89930232
chr1	89931520	89933351
chr1	89933588	89934578
chr1	89935444	89935849
chr1	89938163	89938378
chr1	89939120	89939518
chr1	89939635	89940762
chr1	89941019	89941462
chr1	89941665	89941841
chr1	89942326	89942491
chr1	89942660	89942899
chr1	89943140	89943571
chr1	90049929	90050342
chr1	90060751	90060936
chr1	90222330	90222564
chr1	90973375	90973526
chr1	91044465	91044650
chr1	91239316	91239501
chr1	91755257	91755442
chr1	91874990	91875348
chr1	92180169	92180481
chr1	92647872	92648406
chr1	92648640	92649133
chr1	92736733	92736933
chr1	92743068	92743319
chr1	92834049	92834397
chr1	93128793	93128991
chr1	93334513	93334768
chr1	93622909	93623134
chr1	93726923	93727365
chr1	93759885	93760070
chr1	93830397	93830688
chr1	94034930	94034986
chr1	97692146	97692421
chr1	98280576	98280764
chr1	101934537	101934754
chr1	102628108	102628411
chr1	104746910	104747146
chr1	105839407	105839606
chr1	105881094	105881289
chr1	105891171	105891459
chr1	107774470	107774764
chr1	109871600	109872056
chr1	112378747	112379128
chr1	112379729	112380086
chr1	118460889	118461070
chr1	118672233	118672487
chr1	119083491	119083836
chr1	119189496	119189689
chr1	119458060	119458322
chr1	119894968	119895308
chr1	120197218	120197442
chr1	120586524	120586765
chr1	120595490	120595679
chr1	120596136	120596719
chr1	120597251	120597513
chr1	120598700	120600023
chr1	120600488	120601767
chr1	120601923	120602107
chr1	120603625	120605413
chr1	120605516	120605894
chr1	120606459	120607285
chr1	120607403	120607522
chr1	120994068	120994253
chr1	121177750	121178363
chr1	121180011	121180347
chr1	126671686	126671880
chr1	127484064	127484249
chr1	127500252	127500659
chr1	128064388	128064573
chr1	128417811	128417885
chr1	131052825	131053071
chr1	131116811	131116996
chr1	131270083	131270274
chr1	131658222	131658424
chr1	131823635	131823847
chr1	131937791	131937976
chr1	131981753	131981979
chr1	132046333	132046690
chr1	132116789	132116974
chr1	132121128	132121437
chr1	132155800	132156055
chr1	132157382	132157862
chr1	132158073	132158173
chr1	132355856	132356057
chr1	132521117	132521366
chr1	132521497	132521756
chr1	132525728	132525954
chr1	132650369	132650583
chr1	132758704	132758719
chr1	133039508	133039879
chr1	133199834	133200038
chr1	133306839	133307200
chr1	133307383	133307691
chr1	133325963	133326195
chr1	133353595	133353878
chr1	133610404	133610490
chr1	133736190	133736568
chr1	133892863	133893093
chr1	134046731	134046734
chr1	134083152	134083337
chr1	134120280	134120504
chr1	134225434	134225619
chr1	134244775	134244853
chr1	134332633	134332901
chr1	134710168	134710306
chr1	134995528	134995676
chr1	135112646	135112835
chr1	135259251	135259398
chr1	135381853	135382045
chr1	135540428	135540510
chr1	135544819	135545006
chr1	135752743	135753298
chr1	135779271	135779456
chr1	135781372	135781575
chr1	135788197	135788382
chr1	135811363	135811572
chr1	135847112	135847519
chr1	135945177	135945378
chr1	135945469	135945894
chr1	136048973	136049167
chr1	136159292	136159554
chr1	136167797	136168007
chr1	136170167	136170442
chr1	136174137	136174355
chr1	136175307	136175646
chr1	136212773	136213010
chr1	136326184	136326225
chr1	136613484	136613710
chr1	136947006	136947854
chr1	136948157	136948262
chr1	136952320	136952630
chr1	136952828	136952940
chr1	136953267	136953361
chr1	138836781	138836993
chr1	138837393	138837602
chr1	138837756	138839228
chr1	138839356	138841529
chr1	138842254	138842835
chr1	138843263	138843393
chr1	138844300	138844597
chr1	138845253	138845856
chr1	138846026	138846525
chr1	138847355	138847498
chr1	138847960	138848225
chr1	138856093	138856449
chr1	142588522	142588741
chr1	142588832	142589051
chr1	144406739	144406924
chr1	146282244	146282502
chr1	146806012	146806224
chr1	151079024	151079213
chr1	151088053	151088370
chr1	151564489	151564754
chr1	151706153	151706411
chr1	151886653	151886841
chr1	152413761	152413980
chr1	153414273	153414503
chr1	153746773	153747001
chr1	154181080	154181283
chr1	154204847	154204906
chr1	154785924	154786541
chr1	155006495	155007257
chr1	155025968	155026216
chr1	155028294	155028549
chr1	155029221	155029434
chr1	155048992	155049482
chr1	155224087	155224331
chr1	155529294	155529574
chr1	155735465	155735867
chr1	155736061	155738947
chr1	155739821	155740006
chr1	155740135	155741501
chr1	155743356	155743616
chr1	155784938	155785316
chr1	156085740	156086101
chr1	156241809	156242060
chr1	157076839	157077636
chr1	157480366	157480643
chr1	157553108	157553389
chr1	158953683	158953878
chr1	159566815	159567010
chr1	159594223	159594424
chr1	159854486	159854536
chr1	160819851	160820053
chr1	161727354	161727726
chr1	162426104	162426318
chr1	163150658	163150881
chr1	163710183	163710406
chr1	164138657	164139096
chr1	165104792	165105044
chr1	165185572	165185763
chr1	165252329	165252514
chr1	165320596	165320785
chr1	165663005	165663209
chr1	166154280	166154552
chr1	166160704	166160997
chr1	166360233	166360486
chr1	167231584	167231814
chr1	167369948	167370404
chr1	167637059	167637360
chr1	167645042	167645213
chr1	167688285	167688317
chr1	167689627	167690502
chr1	167690722	167691517
chr1	167691679	167692002
chr1	167692485	167692933
chr1	168328663	168328848
chr1	169041979	169042306
chr1	169517713	169518283
chr1	169919166	169919397
chr1	170037263	170037560
chr1	170292626	170292733
chr1	170383429	170383546
chr1	170392080	170392277
chr1	170393168	170393249
chr1	170632443	170632701
chr1	170771506	170771742
chr1	171063733	171064103
chr1	171064797	171065413
chr1	171065503	171066027
chr1	171066476	171066787
chr1	171070437	171070802
chr1	171071184	171071436
chr1	171071692	171072110
chr1	171072240	171072826
chr1	171072944	171073653
chr1	171078033	171078434
chr1	171079096	171079729
chr1	171079923	171081215
chr1	171220792	171220988
chr1	171256991	171257273
chr1	171258852	171259085
chr1	171437253	171437323
chr1	172319375	172319392
chr1	172319527	172319579
chr1	172325928	172326069
chr1	172490571	172490788
chr1	172528748	172529168
chr1	172561886	172562049
chr1	174796398	174796583
chr1	175385640	175385692
chr1	175936355	175936540
chr1	177442098	177442218
chr1	178960134	178960459
chr1	180268620	180269271
chr1	180422996	180423093
chr1	180424595	180424780
chr1	180434225	180434442
chr1	180484200	180484308
chr1	180550840	180551173
chr1	181257139	181257265
chr1	181272938	181273143
chr1	181380253	181380458
chr1	181545512	181545818
chr1	181888082	181888321
chr1	181888569	181889415
chr1	181921740	181921958
chr1	182114710	182114880
chr1	182114888	182114895
chr1	182115299	182115542
chr1	182141600	182141922
chr1	182563378	182563569
chr1	182574108	182574155
chr1	182618669	182618854
chr1	182793062	182793136
chr1	182793456	182793705
chr1	182868566	182868761
chr1	182868870	182869126
chr1	182902169	182902413
chr1	182960495	182960509
chr1	182983025	182983067
chr1	182990982	182991292
chr1	183439149	183439391
chr1	183442206	183442658
chr1	183521606	183521852
chr1	183657223	183657408
chr1	184036877	184037209
chr1	184717156	184717380
chr1	184717867	184718467
chr1	184718697	184718841
chr1	184724630	184725040
chr1	184726884	184727069
chr1	184727299	184727702
chr1	184728108	184728505
chr1	184728656	184728999
chr1	184729321	184730338
chr1	184730525	184731122
chr1	184731284	184731499
chr1	184733236	184733451
chr1	184734902	184735144
chr1	184735431	184735894
chr1	184738077	184738262
chr1	184814550	184814776
chr1	184824540	184824823
chr1	185185741	185185968
chr1	186094067	186094257
chr1	186721985	186722173
chr1	186997994	186998209
chr1	187607535	187607873
chr1	187610175	187610232
chr1	188919825	188920194
chr1	189579412	189579628
chr1	189973192	189973286
chr1	190172392	190173509
chr1	190173741	190173948
chr1	190174200	190174314
chr1	190902733	190902988
chr1	191185500	191185555
chr1	191242299	191242621
chr1	191312391	191312525
chr1	191318923	191318948
chr1	191318953	191319169
chr1	191435559	191435743
chr1	191818006	191818216
chr1	191818308	191818366
chr1	191834764	191835214
chr1	191868368	191868739
chr1	191964357	191964722
chr1	191965144	191965578
chr1	192189213	192189440
chr1	192208058	192208246
chr1	192312561	192312622
chr1	192439199	192439418
chr1	193174397	193174521
chr1	193208255	193208449
chr1	193330247	193330534
chr1	193383118	193383326
chr1	193386193	193386408
chr1	193576126	193576486
chr1	193698865	193699139
chr1	193703219	193703401
chr1	194223094	194223287
chr1	194607459	194607644
chr1	194681222	194681459
chr10	3113490	3113846
chr10	3116236	3116433
chr10	3531484	3531669
chr10	3862222	3862407
chr10	3920769	3920991
chr10	4347068	4347172
chr10	4406687	4406965
chr10	5083020	5083205
chr10	7747041	7747229
chr10	8240261	8240485
chr10	8242459	8242645
chr10	8715810	8715999
chr10	9902255	9902258
chr10	10084893	10085091
chr10	11492122	11492314
chr10	13564767	13564827
chr10	13605608	13605834
chr10	14391014	14391254
chr10	15063829	15064225
chr10	18197474	18197603
chr10	18453419	18453719
chr10	18470899	18471095
chr10	18526482	18526599
chr10	19352736	19353410
chr10	19355086	19355515
chr10	19357105	19357427
chr10	20966116	20966417
chr10	21055554	21055693
chr10	21056476	21056711
chr10	21465527	21465689
chr10	21588520	21588818
chr10	21991942	21992045
chr10	22150116	22152258
chr10	22152910	22153490
chr10	22154068	22154314
chr10	22158723	22158813
chr10	22158998	22159433
chr10	22402608	22402813
chr10	22813490	22813882
chr10	22815775	22816334
chr10	22816414	22816824
chr10	22817612	22817960
chr10	22819123	22819828
chr10	22819978	22820452
chr10	22843085	22843331
chr10	24622608	24622900
chr10	25265261	25265455
chr10	25571479	25571499
chr10	25571545	25571698
chr10	26327756	26327776
chr10	27133237	27133459
chr10	28485674	28485909
chr10	30844456	30844778
chr10	33888036	33888263
chr10	34747473	34747738
chr10	36924559	36924847
chr10	37263590	37263923
chr10	40212447	40212767
chr10	40737687	40737991
chr10	41004182	41004654
chr10	41042336	41042655
chr10	41289011	41289176
chr10	41442065	41442250
chr10	41679072	41679091
chr10	41934696	41934963
chr10	42031105	42031242
chr10	42055270	42055467
chr10	42579345	42579377
chr10	42580001	42580140
chr10	42580616	42580623
chr10	42580928	42581205
chr10	42585002	42585426
chr10	42585575	42586157
chr10	42591047	42591138
chr10	42631711	42632055
chr10	42633880	42634260
chr10	42635174	42635435
chr10	42636714	42636770
chr10	42636993	42637096
chr10	42637363	42637561
chr10	42842381	42842774
chr10	42930409	42930594
chr10	42957836	42957863
chr10	43322656	43322841
chr10	43910865	43911050
chr10	43919080	43919298
chr10	44004508	44004854
chr10	44526903	44527043
chr10	44527699	44528047
chr10	44528224	44528688
chr10	45473787	45473788
chr10	47755065	47755297
chr10	50892027	50892726
chr10	50893351	50893653
chr10	50896548	50896937
chr10	50898509	50899213
chr10	50899714	50899942
chr10	50902058	50902117
chr10	50902381	50902393
chr10	50903713	50903963
chr10	50904065	50904254
chr10	50905148	50905274
chr10	52023039	52023608
chr10	52023812	52024073
chr10	52025128	52025497
chr10	52221269	52221454
chr10	53348467	53348612
chr10	58982569	58982860
chr10	59383160	59383490
chr10	59865132	59865430
chr10	59893007	59893209
chr10	59894109	59895022
chr10	59997614	59997908
chr10	60126113	60126363
chr10	60148165	60148386
chr10	60191785	60191814
chr10	60244925	60245693
chr10	60303365	60303791
chr10	60305325	60305642
chr10	60407872	60408168
chr10	60687894	60688027
chr10	60697171	60697375
chr10	60760492	60760865
chr10	60779168	60779402
chr10	60779618	60780111
chr10	60797202	60797387
chr10	60835012	60835206
chr10	60960031	60960325
chr10	61052264	61052594
chr10	61068276	61068708
chr10	61072463	61072903
chr10	61381297	61381472
chr10	61492140	61492353
chr10	61662620	61662668
chr10	61662683	61662809
chr10	62182927	62183374
chr10	62186937	62187171
chr10	62261030	62261302
chr10	62590393	62590508
chr10	63066055	63066591
chr10	63382942	63382952
chr10	66343050	66343293
chr10	66468509	66468706
chr10	67836228	67836268
chr10	67871857	67872121
chr10	67998255	67998532
chr10	68013211	68013442
chr10	68165888	68166090
chr10	68283346	68283446
chr10	69045409	69045594
chr10	69353098	69353113
chr10	69644050	69644227
chr10	69689118	69689329
chr10	69793141	69793383
chr10	69911493	69911678
chr10	70155863	70156072
chr10	70159705	70159893
chr10	70317545	70317777
chr10	70761527	70761714
chr10	71346578	71346768
chr10	73280580	73280834
chr10	74920976	74921545
chr10	75021149	75021340
chr10	75043940	75044308
chr10	75059417	75059550
chr10	75135872	75136169
chr10	75149450	75149635
chr10	75151389	75151617
chr10	75151779	75152167
chr10	75170642	75170643
chr10	75436916	75437131
chr10	75456453	75456724
chr10	75586347	75586513
chr10	75635711	75636018
chr10	75860963	75861056
chr10	75950790	75950816
chr10	75952005	75952108
chr10	76275363	76275548
chr10	76835700	76835973
chr10	77021280	77021537
chr10	77129886	77130261
chr10	77130410	77131091
chr10	77151022	77151217
chr10	77151225	77151236
chr10	77252873	77253089
chr10	77353441	77353707
chr10	77497366	77497596
chr10	77782047	77782310
chr10	77814987	77815207
chr10	77862284	77862541
chr10	77901270	77901417
chr10	78018857	78018882
chr10	78160113	78160300
chr10	78197460	78197645
chr10	78392100	78392346
chr10	78438165	78438446
chr10	78487844	78487948
chr10	79595875	79596146
chr10	79665582	79665776
chr10	79726180	79726365
chr10	79805875	79806202
chr10	79812247	79812577
chr10	79822252	79822437
chr10	79834920	79835165
chr10	79860490	79860696
chr10	79925052	79925683
chr10	79933423	79933789
chr10	79934307	79934496
chr10	79958148	79958428
chr10	79987299	79987546
chr10	80040322	80040344
chr10	80040694	80041317
chr10	80089911	80090096
chr10	80114625	80114674
chr10	80129832	80130305
chr10	80132698	80132913
chr10	80199440	80199808
chr10	80304886	80305127
chr10	80315264	80315514
chr10	80341166	80341380
chr10	80341664	80342165
chr10	80342393	80342593
chr10	80348718	80348842
chr10	80350295	80350608
chr10	80350816	80351032
chr10	80376292	80376477
chr10	80434162	80434289
chr10	80446239	80446627
chr10	80450777	80450979
chr10	80513909	80514101
chr10	80566354	80566476
chr10	80569799	80570117
chr10	80574226	80574321
chr10	80676304	80676546
chr10	80757802	80758024
chr10	80774734	80774969
chr10	80899040	80899104
chr10	80928580	80928596
chr10	80931812	80932124
chr10	80932256	80932294
chr10	80988146	80988466
chr10	80995351	80995552
chr10	80999056	80999548
chr10	81041333	81041767
chr10	81153529	81153749
chr10	81190384	81190658
chr10	81234199	81234207
chr10	81288152	81289023
chr10	81289251	81289548
chr10	81292569	81292789
chr10	81303465	81303788
chr10	81304958	81305143
chr10	81316811	81316996
chr10	81319294	81319313
chr10	81356648	81356984
chr10	81364882	81365288
chr10	81408792	81409090
chr10	81431851	81431934
chr10	81450173	81450480
chr10	81464277	81464278
chr10	81502703	81502724
chr10	81561724	81561854
chr10	81564405	81564527
chr10	81604828	81604835
chr10	81704567	81705426
chr10	81770655	81771257
chr10	81812301	81812554
chr10	81846519	81846783
chr10	81863510	81864259
chr10	81929941	81930842
chr10	81978667	81979042
chr10	81996708	81997091
chr10	82901386	82901912
chr10	82955188	82955469
chr10	83048841	83049024
chr10	83632316	83632533
chr10	83820150	83820229
chr10	83954341	83954776
chr10	84386193	84386279
chr10	84437412	84437511
chr10	84450707	84450910
chr10	84711609	84711887
chr10	84758923	84759258
chr10	84908646	84908831
chr10	85220919	85221037
chr10	85458995	85459218
chr10	85542608	85542793
chr10	85651882	85652099
chr10	85745736	85745991
chr10	86064919	86065194
chr10	86296123	86296152
chr10	86296308	86296492
chr10	86463879	86464108
chr10	86637380	86637443
chr10	87024953	87025246
chr10	87552733	87552973
chr10	88327422	88327791
chr10	88459476	88459738
chr10	90036545	90036759
chr10	91032536	91032906
chr10	92610778	92611048
chr10	93291318	93291644
chr10	93425794	93426021
chr10	93549019	93549317
chr10	93834392	93834428
chr10	94209629	94209877
chr10	94585061	94585156
chr10	94609314	94609577
chr10	94919716	94919823
chr10	94927080	94927270
chr10	94949837	94950044
chr10	95074688	95074935
chr10	95502104	95502123
chr10	95790761	95791336
chr10	95838936	95839135
chr10	96160944	96161428
chr10	96674132	96674346
chr10	98959437	98959632
chr10	99150194	99150397
chr10	99299179	99299473
chr10	99615861	99616106
chr10	103027245	103028329
chr10	103029247	103030528
chr10	105238324	105238626
chr10	105505979	105506164
chr10	105672776	105673001
chr10	106391719	106392010
chr10	106396855	106397040
chr10	108679754	108680041
chr10	110784977	110785194
chr10	110939236	110939426
chr10	111972429	111972607
chr10	112425406	112425608
chr10	116196693	116196733
chr10	116197397	116197547
chr10	116319399	116319635
chr10	117033865	117034050
chr10	117435673	117435743
chr10	117436858	117437232
chr10	117731414	117731617
chr10	118370530	118370759
chr10	118592705	118592922
chr10	118641173	118641373
chr10	119100670	119100855
chr10	120422155	120422380
chr10	120428610	120428642
chr10	120474232	120474574
chr10	120477817	120477911
chr10	120478314	120478516
chr10	120551781	120551995
chr10	120553199	120553236
chr10	120736246	120736431
chr10	121256506	121256781
chr10	121291416	121291678
chr10	122051450	122052206
chr10	124292610	124292798
chr10	126330728	126330919
chr10	126833157	126833342
chr10	126861711	126861906
chr10	126869888	126869980
chr10	126919046	126919758
chr10	127061118	127061141
chr10	127065165	127065476
chr10	127171152	127171366
chr10	127224302	127224492
chr10	127312543	127312615
chr10	127513526	127513683
chr10	127526820	127527022
chr10	127537828	127538108
chr10	127555718	127556065
chr10	127641791	127642036
chr10	127674742	127675067
chr10	128437852	128438132
chr10	128536340	128536697
chr10	128544581	128544779
chr10	128549933	128550211
chr10	128895567	128895725
chr10	128945689	128945874
chr10	128977691	128977886
chr10	130594780	130595086
chr11	3125613	3125842
chr11	3202654	3202660
chr11	3306606	3306803
chr11	3471476	3471697
chr11	3517756	3517938
chr11	3786680	3786929
chr11	4001710	4001914
chr11	4219416	4219601
chr11	4258478	4259204
chr11	4302381	4302585
chr11	4984397	4984582
chr11	5114920	5115308
chr11	5115414	5115748
chr11	5134660	5134862
chr11	5836222	5836407
chr11	5885937	5887000
chr11	5912838	5913023
chr11	6018843	6019060
chr11	6032050	6032403
chr11	6186887	6187138
chr11	6187996	6188316
chr11	6423005	6423198
chr11	6602507	6602722
chr11	6655053	6655238
chr11	6768969	6769155
chr11	7210172	7210480
chr11	8424361	8424435
chr11	11820249	11820568
chr11	11844391	11844646
chr11	11973393	11973639
chr11	12037783	12037848
chr11	12129377	12129568
chr11	12359447	12359673
chr11	12373404	12373693
chr11	12532422	12532665
chr11	13316012	13316217
chr11	18871311	18871316
chr11	18873691	18874500
chr11	18874905	18876454
chr11	18876548	18877026
chr11	19021189	19021354
chr11	19947690	19947875
chr11	20401035	20401113
chr11	20794412	20794644
chr11	20794755	20795091
chr11	20915104	20915302
chr11	21992668	21993286
chr11	21993684	21995332
chr11	21995554	21996501
chr11	21997099	21998808
chr11	21999188	22000881
chr11	22003556	22004026
chr11	22617808	22617907
chr11	25099942	25100315
chr11	25645594	25645612
chr11	25855864	25855940
chr11	25862976	25863184
chr11	26669661	26669891
chr11	26961636	26961821
chr11	28339727	28339965
chr11	29746208	29746393
chr11	29824854	29825471
chr11	31638091	31638316
chr11	31676695	31676973
chr11	31734158	31734396
chr11	32018284	32018326
chr11	32061995	32062192
chr11	32106534	32106639
chr11	32107668	32107832
chr11	32238535	32238782
chr11	32259673	32259943
chr11	32287364	32287614
chr11	32299945	32299990
chr11	32321187	32321555
chr11	32324743	32324967
chr11	32588124	32588342
chr11	32589188	32589399
chr11	32619255	32619452
chr11	32725931	32726492
chr11	33148472	33148634
chr11	33195797	33196042
chr11	33196483	33203546
chr11	33203704	33205421
chr11	33205533	33206069
chr11	33605888	33606265
chr11	33733309	33733578
chr11	33754818	33755146
chr11	33756755	33756940
chr11	33781657	33781742
chr11	33917690	33917875
chr11	34276659	34276879
chr11	34832585	34832769
chr11	35451801	35451992
chr11	35665033	35665252
chr11	35667488	35667686
chr11	36001473	36001527
chr11	36002126	36002329
chr11	36045733	36045827
chr11	36080655	36080663
chr11	36221349	36221377
chr11	41111314	41111524
chr11	43238137	43238355
chr11	43412757	43413060
chr11	43613174	43613399
chr11	43667314	43667409
chr11	43766914	43766958
chr11	44610922	44611021
chr11	44612573	44612906
chr11	45008332	45008479
chr11	45770424	45770609
chr11	45945070	45945231
chr11	45979982	45980020
chr11	45981153	45981194
chr11	46431202	46431387
chr11	46497604	46497809
chr11	49103460	49103687
chr11	49869706	49869891
chr11	49901269	49901289
chr11	49903228	49903549
chr11	49955071	49955256
chr11	49955918	49956176
chr11	49961434	49961619
chr11	50155385	50155595
chr11	50161584	50161807
chr11	50230943	50231236
chr11	50403509	50403701
chr11	50487968	50488188
chr11	50587811	50587999
chr11	50767076	50767270
chr11	50769599	50769898
chr11	50929384	50929733
chr11	50940086	50940378
chr11	51539678	51539984
chr11	51617793	51617986
chr11	51681676	51682047
chr11	51816852	51817037
chr11	51817533	51818488
chr11	51945927	51945963
chr11	51946242	51946471
chr11	52167369	52167417
chr11	52254098	52254283
chr11	53032395	53032581
chr11	53252638	53252729
chr11	53255113	53255302
chr11	53301643	53301969
chr11	53443973	53444203
chr11	53463256	53463293
chr11	53584848	53585045
chr11	53737139	53737778
chr11	54002264	54002347
chr11	54307501	54307725
chr11	54930721	54931033
chr11	54998214	54998620
chr11	55087095	55087335
chr11	55158904	55159225
chr11	55204160	55204187
chr11	55232342	55232693
chr11	55386507	55386908
chr11	55386987	55387203
chr11	55446515	55446865
chr11	55518846	55519183
chr11	55991703	55991969
chr11	56374582	56374669
chr11	57214565	57214808
chr11	57506691	57506965
chr11	57548943	57549182
chr11	57778443	57778999
chr11	57827201	57827422
chr11	57828434	57828996
chr11	57829353	57829763
chr11	57831894	57832146
chr11	57832595	57832847
chr11	57934198	57934488
chr11	57951239	57951490
chr11	57963472	57963588
chr11	58148317	58148502
chr11	58927941	58928177
chr11	59176896	59177273
chr11	59239234	59239475
chr11	59807708	59807893
chr11	60027590	60027800
chr11	60189862	60190047
chr11	60199765	60200067
chr11	60206673	60206898
chr11	60927364	60927468
chr11	60953780	60954158
chr11	61104356	61104559
chr11	61146760	61146976
chr11	61417979	61418224
chr11	61421773	61421958
chr11	61715082	61715267
chr11	62024335	62024487
chr11	62676042	62676119
chr11	62790019	62790165
chr11	63135707	63136008
chr11	63889247	63889565
chr11	63906735	63906920
chr11	63919273	63919919
chr11	63923818	63923979
chr11	63924341	63924865
chr11	63925465	63925566
chr11	66421100	66421296
chr11	66905937	66906199
chr11	66984172	66984385
chr11	67010641	67010647
chr11	67085383	67085671
chr11	67101343	67101617
chr11	67101955	67102191
chr11	67112197	67112382
chr11	67350442	67350659
chr11	67386937	67387262
chr11	67515324	67515580
chr11	67571790	67572114
chr11	67609639	67609824
chr11	67647737	67648165
chr11	67897309	67897494
chr11	68216075	68216364
chr11	69092845	69093047
chr11	69269717	69269902
chr11	69272330	69272558
chr11	69398089	69398194
chr11	69398214	69398381
chr11	69399757	69400345
chr11	69400918	69401610
chr11	69664637	69664943
chr11	69665615	69665837
chr11	69799274	69799462
chr11	69802351	69802398
chr11	69934289	69934373
chr11	69965260	69965348
chr11	69965987	69966294
chr11	69989930	69990120
chr11	70074777	70075112
chr11	70201674	70201979
chr11	70230255	70230365
chr11	70230631	70230726
chr11	70605191	70605524
chr11	70649030	70649380
chr11	70777314	70777444
chr11	72052887	72053103
chr11	72080384	72080699
chr11	72103478	72103522
chr11	72342128	72342456
chr11	72342554	72342880
chr11	72355057	72355418
chr11	72567024	72567209
chr11	72689363	72689409
chr11	73001140	73001339
chr11	73007838	73008049
chr11	73137560	73137603
chr11	73138804	73138859
chr11	74225471	74225656
chr11	74371720	74371935
chr11	74401514	74401705
chr11	74547605	74547622
chr11	74634517	74634907
chr11	74769596	74769954
chr11	74843137	74843415
chr11	74847829	74848084
chr11	74871073	74871211
chr11	75165412	75166074
chr11	75195756	75195926
chr11	75260416	75260601
chr11	75292302	75292668
chr11	75431330	75431648
chr11	75530440	75530510
chr11	75566139	75566334
chr11	75573466	75573644
chr11	75599853	75600099
chr11	75846710	75846895
chr11	75870594	75870818
chr11	76253390	76253695
chr11	76454581	76454812
chr11	76456198	76456554
chr11	76499342	76499527
chr11	76509784	76509847
chr11	76524967	76525278
chr11	76550188	76550373
chr11	76577974	76578220
chr11	76606592	76606777
chr11	76647722	76647831
chr11	76672486	76672542
chr11	76872912	76873097
chr11	76997362	76997378
chr11	77303631	77303816
chr11	77467939	77468122
chr11	77501544	77501759
chr11	77507482	77507715
chr11	77508113	77508140
chr11	77519088	77519326
chr11	77807803	77807818
chr11	77823248	77823530
chr11	77827208	77827474
chr11	77914733	77914922
chr11	77969363	77969548
chr11	78158834	78159390
chr11	78358652	78358872
chr11	78360658	78360806
chr11	78465187	78465288
chr11	78886891	78886962
chr11	78956518	78956762
chr11	79015956	79016141
chr11	79019367	79020245
chr11	79020743	79020956
chr11	79030664	79031106
chr11	79160163	79160396
chr11	79213873	79214389
chr11	79224559	79224829
chr11	79577872	79578357
chr11	79585234	79585486
chr11	79590131	79590410
chr11	79617919	79618107
chr11	79686808	79687209
chr11	80154870	80154966
chr11	80208865	80208955
chr11	80287234	80287528
chr11	80974725	80974941
chr11	81534938	81535123
chr11	81588641	81588869
chr11	81996178	81996808
chr11	82177853	82178120
chr11	82235706	82235891
chr11	83392946	83393156
chr11	83556445	83556675
chr11	83850095	83850760
chr11	83851067	83853729
chr11	83854027	83854513
chr11	84515862	84516232
chr11	84527219	84527491
chr11	84707795	84708057
chr11	84724287	84724503
chr11	84794776	84794896
chr11	84798047	84798239
chr11	84813766	84814228
chr11	84918495	84918785
chr11	85170141	85170247
chr11	85172861	85173070
chr11	85829258	85829453
chr11	85829637	85829982
chr11	85830626	85832536
chr11	85832766	85832971
chr11	85833086	85833323
chr11	85833572	85833884
chr11	85834103	85835592
chr11	85835695	85838588
chr11	85839430	85841559
chr11	85842272	85842374
chr11	85842546	85843227
chr11	85844917	85845040
chr11	85849107	85849432
chr11	85886360	85886854
chr11	85888342	85888849
chr11	85889735	85891460
chr11	85891619	85891818
chr11	85891928	85892237
chr11	85925090	85925307
chr11	86358456	86358515
chr11	86886763	86886997
chr11	87010472	87010728
chr11	87443176	87443482
chr11	87462185	87462464
chr11	87471331	87471614
chr11	87797593	87797681
chr11	87967760	87967807
chr11	87974832	87975043
chr11	88216949	88216981
chr11	88252311	88252434
chr11	88471927	88471945
chr11	88572830	88572914
chr11	88728532	88728826
chr11	88729057	88729242
chr11	88823211	88823344
chr11	89100559	89100671
chr11	89165355	89165573
chr11	89303745	89303759
chr11	90148402	90148690
chr11	90170188	90170239
chr11	90355722	90355929
chr11	90485358	90485543
chr11	90697409	90697619
chr11	90901717	90901930
chr11	93418729	93418914
chr11	93471972	93472109
chr11	93763604	93763619
chr11	93812397	93812660
chr11	94133301	94133425
chr11	94211122	94211313
chr11	94404858	94405043
chr11	94486019	94486328
chr11	94866632	94866987
chr11	94936307	94936492
chr11	94939325	94939624
chr11	95001225	95001527
chr11	95046511	95046848
chr11	95046947	95047409
chr11	95106511	95107170
chr11	95117075	95117580
chr11	95118124	95118478
chr11	95118579	95118783
chr11	95121672	95121878
chr11	95142075	95142279
chr11	95142742	95143166
chr11	95143456	95143510
chr11	95144303	95144688
chr11	95146391	95146575
chr11	95148622	95149103
chr11	95149603	95149999
chr11	95150080	95150600
chr11	95258531	95258618
chr11	95397984	95398198
chr11	95503083	95503290
chr11	95513216	95513296
chr11	95520915	95521233
chr11	95521633	95521926
chr11	95533562	95534169
chr11	95648859	95649059
chr11	95712080	95712246
chr11	95830410	95830756
chr11	95830897	95830908
chr11	95831315	95831345
chr11	95914679	95914873
chr11	95991851	95992105
chr11	96004474	96004668
chr11	96004981	96005966
chr11	96006379	96008091
chr11	96076724	96076729
chr11	96173155	96173518
chr11	96175500	96175696
chr11	96177528	96177904
chr11	96189944	96190255
chr11	96194582	96195069
chr11	96199666	96199851
chr11	96200087	96200343
chr11	96201605	96201790
chr11	96202459	96203067
chr11	96203251	96204156
chr11	96261548	96261815
chr11	96265972	96266181
chr11	96268296	96268607
chr11	96269754	96270202
chr11	96271608	96271913
chr11	96277399	96277890
chr11	96278634	96279075
chr11	96279427	96280091
chr11	96283130	96283408
chr11	96284171	96284370
chr11	96285874	96286482
chr11	96287020	96287599
chr11	96294491	96294880
chr11	96299193	96299699
chr11	96300374	96300601
chr11	96300871	96301056
chr11	96301690	96302310
chr11	96302402	96303271
chr11	96303854	96304251
chr11	96311775	96312111
chr11	96317642	96318262
chr11	96320655	96320985
chr11	96341614	96342342
chr11	96342707	96342896
chr11	96343301	96343621
chr11	96344146	96344597
chr11	96344811	96345015
chr11	96345696	96346354
chr11	96352076	96352292
chr11	96352808	96353738
chr11	96354139	96354851
chr11	96407460	96407656
chr11	96407912	96408030
chr11	96860402	96860976
chr11	96867488	96867691
chr11	96910009	96910325
chr11	96970905	96971257
chr11	96982546	96982859
chr11	97018935	97019014
chr11	97026227	97026363
chr11	97137714	97137936
chr11	97152901	97153046
chr11	97281300	97281320
chr11	97403809	97403928
chr11	97451825	97451976
chr11	97464434	97464883
chr11	97466938	97467245
chr11	97468941	97469176
chr11	97477029	97477317
chr11	97477800	97478046
chr11	97489639	97489894
chr11	97500661	97500864
chr11	97511094	97511495
chr11	97534596	97535103
chr11	97556955	97557227
chr11	97576059	97576136
chr11	97576956	97577169
chr11	97622485	97622735
chr11	97628309	97628655
chr11	97630469	97630707
chr11	97689968	97690305
chr11	97820025	97820210
chr11	97899908	97900112
chr11	98002718	98002903
chr11	98002994	98003605
chr11	98318782	98318985
chr11	98319801	98320232
chr11	98320945	98321421
chr11	98321583	98321868
chr11	98324062	98324289
chr11	98326607	98327199
chr11	98328875	98329409
chr11	98342065	98342336
chr11	98342756	98343044
chr11	98343867	98344135
chr11	98380413	98380598
chr11	98546107	98546282
chr11	98635393	98635734
chr11	98672901	98673103
chr11	98673316	98673535
chr11	98770649	98770763
chr11	98858991	98859248
chr11	98909700	98909981
chr11	98922431	98922816
chr11	98929843	98930049
chr11	98971358	98971953
chr11	98972917	98973223
chr11	99149915	99150298
chr11	100169241	100169738
chr11	100282031	100282928
chr11	100295225	100296128
chr11	100298052	100298512
chr11	100362563	100362727
chr11	100363085	100363435
chr11	100626931	100627117
chr11	100702589	100702800
chr11	100710582	100710834
chr11	100714598	100714889
chr11	100893439	100893924
chr11	100957348	100957541
chr11	100983656	100983706
chr11	101057896	101058118
chr11	101067173	101067607
chr11	101173075	101173152
chr11	101261130	101261343
chr11	101263591	101263874
chr11	101641823	101642029
chr11	101659241	101659343
chr11	101732552	101732825
chr11	101757638	101757823
chr11	101813400	101813817
chr11	101814934	101815105
chr11	101905232	101905427
chr11	101919683	101919930
chr11	101963030	101963317
chr11	101968494	101968679
chr11	101968903	101969186
chr11	102040204	102040491
chr11	102061294	102061352
chr11	102138586	102138656
chr11	102145843	102146009
chr11	102147294	102147402
chr11	102147786	102147971
chr11	102267486	102267694
chr11	102308665	102308822
chr11	102309782	102309892
chr11	102399356	102399411
chr11	102409430	102409684
chr11	102411788	102411990
chr11	102773976	102774027
chr11	102777447	102777713
chr11	102819923	102819933
chr11	102893001	102893029
chr11	102900852	102901065
chr11	102993122	102993334
chr11	102993594	102993853
chr11	103021241	103021455
chr11	103088319	103088504
chr11	103103644	103103960
chr11	103161211	103161497
chr11	103175003	103175211
chr11	103326818	103327091
chr11	103332466	103332681
chr11	103359042	103359129
chr11	103966405	103966619
chr11	104195952	104196125
chr11	104315760	104315973
chr11	104325441	104325803
chr11	104517404	104517599
chr11	104521397	104521592
chr11	104534646	104534961
chr11	104590186	104590371
chr11	105347948	105348003
chr11	105450371	105450630
chr11	105967353	105967390
chr11	106418686	106418878
chr11	107059745	107059932
chr11	107132773	107132781
chr11	107865339	107865534
chr11	107982454	107982889
chr11	108031055	108031340
chr11	108034347	108034634
chr11	108210480	108210671
chr11	108378219	108378460
chr11	108846523	108846713
chr11	108941816	108942071
chr11	109011575	109011726
chr11	109012037	109012131
chr11	109244616	109244725
chr11	109521182	109521452
chr11	109670630	109671010
chr11	109860763	109860978
chr11	110422274	110422460
chr11	110572516	110572795
chr11	113165342	113165427
chr11	113175639	113176014
chr11	113192183	113192368
chr11	113297793	113298065
chr11	113326420	113326547
chr11	113648182	113648510
chr11	113703728	113704101
chr11	113811267	113811487
chr11	113811844	113812035
chr11	113865691	113865984
chr11	113872518	113872962
chr11	114068477	114068662
chr11	114193124	114193460
chr11	114448706	114448944
chr11	114495692	114495947
chr11	114523558	114523758
chr11	114636478	114636609
chr11	114637078	114637278
chr11	114684722	114684802
chr11	114684921	114684987
chr11	114745110	114745148
chr11	114789082	114789437
chr11	114912815	114913167
chr11	115153765	115153862
chr11	115181809	115182119
chr11	115182360	115182557
chr11	115202353	115202675
chr11	115249847	115249893
chr11	115270222	115270703
chr11	115474154	115474307
chr11	115674450	115674585
chr11	115714749	115714970
chr11	115776555	115776663
chr11	115777871	115778233
chr11	115860029	115860061
chr11	115899071	115899266
chr11	116024607	116024706
chr11	116138965	116139184
chr11	116222886	116223026
chr11	116318989	116319154
chr11	116433796	116434000
chr11	116446115	116446310
chr11	116581762	116581820
chr11	116586854	116586939
chr11	116592471	116592704
chr11	116628884	116629229
chr11	116643305	116643465
chr11	116663034	116663249
chr11	116809028	116809225
chr11	116885243	116885462
chr11	116913681	116913724
chr11	116913945	116914005
chr11	116993885	116994073
chr11	117018584	117018712
chr11	117028887	117029109
chr11	117056981	117057228
chr11	117057544	117057873
chr11	117072147	117072629
chr11	117177192	117177570
chr11	117312670	117312855
chr11	117313000	117313297
chr11	117357894	117358125
chr11	117358264	117358840
chr11	117359218	117359403
chr11	117359976	117360306
chr11	117384938	117385177
chr11	117390032	117390255
chr11	117824701	117824943
chr11	117870422	117870490
chr11	117889990	117890191
chr11	117970175	117970193
chr11	118021964	118022161
chr11	118083904	118084091
chr11	118102175	118104703
chr11	118220796	118221049
chr11	118362052	118362237
chr11	118485195	118485439
chr11	118490923	118491115
chr11	118507879	118508123
chr11	118511956	118512211
chr11	118550738	118550982
chr11	118738823	118739105
chr11	118739955	118740240
chr11	118740965	118741390
chr11	118769180	118769365
chr11	118891330	118891660
chr11	118897501	118897686
chr11	118957554	118957766
chr11	118998535	118998864
chr11	119034256	119034381
chr11	119037108	119037241
chr11	119042006	119043361
chr11	119043600	119044341
chr11	119044618	119045458
chr11	119045952	119046218
chr11	119046413	119047461
chr11	119047612	119048748
chr11	119052367	119053027
chr11	119054585	119055576
chr11	119057575	119058205
chr11	119058302	119059065
chr11	119081003	119081403
chr11	119087329	119087934
chr11	119088236	119089929
chr11	119091660	119091865
chr11	119127257	119127533
chr11	119129222	119129509
chr11	119144998	119145216
chr11	119176553	119176743
chr11	119187617	119187816
chr11	119190610	119190795
chr11	119203535	119203777
chr11	119206768	119207137
chr11	119363398	119363935
chr11	119515192	119515416
chr11	119804708	119804893
chr11	119891927	119892125
chr11	119907434	119907891
chr11	119991446	119991686
chr11	120010701	120011084
chr11	120028477	120028496
chr11	120044333	120044528
chr11	120065247	120065812
chr11	120102417	120102496
chr11	120170150	120170443
chr11	120204818	120205105
chr11	120218191	120218416
chr11	120245724	120245909
chr11	120259994	120260252
chr11	120261292	120261391
chr11	120263883	120264068
chr11	120274478	120274720
chr11	120306521	120306933
chr11	120307200	120307816
chr11	120353560	120353853
chr11	120515532	120515959
chr11	120612765	120613035
chr11	120658975	120659062
chr11	120720526	120720663
chr11	120775784	120776639
chr11	120905372	120905962
chr11	121223998	121224274
chr12	3390880	3391272
chr12	3518651	3518884
chr12	3834982	3835202
chr12	3893394	3893579
chr12	4080431	4080575
chr12	5196358	5196567
chr12	5410407	5410662
chr12	5743595	5743786
chr12	7217278	7217527
chr12	7926066	7926252
chr12	7978712	7978848
chr12	8059690	8059912
chr12	8297863	8297981
chr12	8298857	8299807
chr12	8301320	8301524
chr12	8311293	8311478
chr12	8313167	8313305
chr12	8547435	8547799
chr12	9052169	9052363
chr12	9571288	9571573
chr12	9573782	9574005
chr12	9574803	9576746
chr12	9577230	9577439
chr12	9579131	9580869
chr12	9581093	9581422
chr12	9581558	9581763
chr12	9582503	9582700
chr12	11178739	11179038
chr12	12023965	12024036
chr12	12323650	12323686
chr12	12420846	12420951
chr12	13214928	13215195
chr12	13462352	13462725
chr12	13997648	13997989
chr12	14283142	14283331
chr12	16091434	16091736
chr12	16509518	16509635
chr12	16533483	16533534
chr12	16718995	16719308
chr12	16760346	16760578
chr12	17035064	17035249
chr12	17241617	17241753
chr12	17241832	17241904
chr12	17554154	17554373
chr12	17554589	17554846
chr12	19387512	19387754
chr12	19388403	19388442
chr12	19388592	19388803
chr12	20614716	20614826
chr12	21111061	21111064
chr12	21444223	21444398
chr12	22156139	22156437
chr12	23466395	23466679
chr12	24675566	24675848
chr12	24697269	24697516
chr12	24717016	24717201
chr12	25092239	25092457
chr12	25475569	25475755
chr12	26387061	26387284
chr12	26400869	26401078
chr12	26533086	26533301
chr12	26621114	26621308
chr12	26621410	26621423
chr12	27947148	27947346
chr12	28665145	28665368
chr12	28699810	28699963
chr12	28710684	28711118
chr12	29083307	29083604
chr12	29628520	29628601
chr12	30039574	30040066
chr12	30040253	30040444
chr12	30091030	30091291
chr12	30208219	30208404
chr12	30369727	30370017
chr12	32291990	32291999
chr12	32897525	32897757
chr12	32911091	32911107
chr12	33027116	33027369
chr12	33379756	33379963
chr12	33388900	33389085
chr12	33928874	33929002
chr12	33954971	33955441
chr12	33955962	33956296
chr12	33956828	33957381
chr12	33958806	33958974
chr12	33959914	33960223
chr12	33960977	33961331
chr12	33962426	33963517
chr12	33963662	33963909
chr12	33966429	33967906
chr12	33968072	33968814
chr12	50999687	51000015
chr12	52001605	52001836
chr12	52448355	52448699
chr12	52930910	52931205
chr12	53843679	53843875
chr12	54404984	54405264
chr12	54710042	54710779
chr12	54713472	54713740
chr12	54714014	54714512
chr12	54718884	54719706
chr12	54729220	54729600
chr12	54734446	54734948
chr12	54735218	54735424
chr12	54738444	54738825
chr12	55124504	55124931
chr12	55154640	55155534
chr12	55199433	55200045
chr12	55229626	55230593
chr12	55321752	55321937
chr12	55499056	55499571
chr12	56058523	56058751
chr12	56275776	56275998
chr12	56520132	56520139
chr12	56520879	56520887
chr12	56521134	56521398
chr12	56524297	56524682
chr12	56532177	56532507
chr12	56533727	56534444
chr12	56536916	56537146
chr12	56537568	56538362
chr12	56614630	56614961
chr12	56681204	56681333
chr12	56688064	56689334
chr12	56689526	56690565
chr12	56690660	56691006
chr12	56691407	56692090
chr12	56692414	56692877
chr12	56693655	56694006
chr12	56694736	56695153
chr12	56695289	56695310
chr12	56695789	56696942
chr12	56697033	56697339
chr12	56697542	56697784
chr12	56698756	56698984
chr12	56699745	56700623
chr12	57534529	57534714
chr12	57534909	57535147
chr12	57535365	57535712
chr12	57536017	57537166
chr12	57537301	57537523
chr12	57538119	57538781
chr12	57539275	57540287
chr12	57540786	57541514
chr12	57541888	57544028
chr12	57544371	57544876
chr12	57546540	57547414
chr12	57547946	57548213
chr12	57548494	57548684
chr12	57549209	57549707
chr12	57549789	57550623
chr12	58551025	58551210
chr12	59036059	59036460
chr12	59038071	59038605
chr12	59040090	59040504
chr12	61705160	61705480
chr12	62176855	62177097
chr12	62548027	62548317
chr12	63393821	63394098
chr12	65915320	65915572
chr12	68996791	68996855
chr12	69169295	69169343
chr12	70314175	70314361
chr12	70430565	70430741
chr12	70494947	70495168
chr12	70910490	70910850
chr12	71536951	71537205
chr12	72104649	72104867
chr12	72461655	72461770
chr12	72832595	72832905
chr12	72854646	72854877
chr12	72918088	72918094
chr12	72938718	72938801
chr12	73035079	73035462
chr12	73037320	73037755
chr12	73037836	73040623
chr12	73040760	73041387
chr12	73042409	73042828
chr12	73043164	73044419
chr12	73046994	73047173
chr12	73048187	73048688
chr12	73048961	73049156
chr12	73049525	73051206
chr12	73052187	73053308
chr12	73054553	73054592
chr12	73054689	73054969
chr12	73584035	73584088
chr12	73705232	73705600
chr12	73709023	73709220
chr12	73794166	73794245
chr12	73794411	73794534
chr12	74013889	74013993
chr12	74230829	74231055
chr12	74333017	74333345
chr12	76479350	76479535
chr12	76650045	76650334
chr12	77410813	77411029
chr12	77568435	77568629
chr12	77788862	77789052
chr12	77868100	77868309
chr12	78987799	78988043
chr12	79661260	79661507
chr12	79905049	79905236
chr12	80730643	80730943
chr12	80757463	80757668
chr12	80769743	80769951
chr12	80895363	80895549
chr12	81199579	81199844
chr12	81582966	81583187
chr12	81619396	81619643
chr12	81788688	81788929
chr12	81915626	81915816
chr12	81932116	81932413
chr12	82002783	82003172
chr12	82033628	82033936
chr12	82400072	82400260
chr12	82415974	82416190
chr12	82877030	82877215
chr12	83305854	83306042
chr12	83543661	83544016
chr12	83771030	83771134
chr12	83843281	83843466
chr12	84569986	84572831
chr12	84589601	84589839
chr12	84653934	84654336
chr12	84784686	84784872
chr12	85201390	85201584
chr12	85305708	85305932
chr12	85487921	85488057
chr12	85698218	85698411
chr12	86402990	86403001
chr12	86726649	86726652
chr12	86769050	86769229
chr12	86772143	86772385
chr12	86772874	86773105
chr12	86796467	86796737
chr12	86879055	86879100
chr12	87001075	87001316
chr12	87053099	87053326
chr12	87175370	87175555
chr12	88428426	88428632
chr12	88439117	88439302
chr12	88755488	88755796
chr12	89106605	89106640
chr12	98347496	98347704
chr12	98674602	98674707
chr12	98965883	98966074
chr12	98991970	98991999
chr12	99084216	99084438
chr12	99096950	99097136
chr12	99271825	99272010
chr12	99645021	99645317
chr12	99953038	99953258
chr12	100390085	100390270
chr12	100392583	100392610
chr12	100841053	100841075
chr12	100841231	100841542
chr12	100849494	100849730
chr12	100958229	100958376
chr12	101030009	101030280
chr12	102412379	102412632
chr12	102529139	102529324
chr12	102549374	102549559
chr12	102685986	102686171
chr12	103144221	103144411
chr12	103325649	103326117
chr12	103348584	103348799
chr12	103995341	103995566
chr12	104443571	104443756
chr12	104471306	104472369
chr12	104473802	104473848
chr12	104473976	104475689
chr12	104475847	104476572
chr12	104476925	104477400
chr12	104939759	104940014
chr12	104952567	104952897
chr12	105027856	105028041
chr12	105104001	105104186
chr12	105109510	105109703
chr12	105373640	105373878
chr12	105427487	105427715
chr12	105498032	105498257
chr12	105584894	105585145
chr12	105960620	105960728
chr12	106478269	106478278
chr12	107677568	107677753
chr12	107980019	107980048
chr12	107998881	107999054
chr12	108005013	108005203
chr12	108206393	108206640
chr12	108231079	108231175
chr12	108255441	108255626
chr12	108293023	108293283
chr12	108305744	108305860
chr12	108333012	108333188
chr12	108363901	108364140
chr12	108433629	108433818
chr12	108613234	108613421
chr12	108903174	108903446
chr12	108903920	108904105
chr12	108953902	108954124
chr12	108959955	108960158
chr12	108980005	108980213
chr12	109054316	109054331
chr12	109264867	109265065
chr12	109437854	109438062
chr12	109445986	109446107
[truncated: 7,513 more rows]

## Sheet: ZFHX3_ZT3 vs ZT15_Diffbind
seqnames	start	end	width	strand	Conc	Conc_Zt15	Conc_Zt3	Fold	p.value	FDR	Zt15	Zt3	peak	feature	start_position	end_position	feature_strand	insideFeature	distancetoFeature	shortestDistance	fromOverlappingOrNearest	symbol
chr7	44869081	44869580	500	*	6.78	7.08	6.41	0.66	0.0927	1	135	85.19	X00001	ENSMUSG00000038502	44863068	44869788	-	inside	458	208	NearestLocation	Ptov1
chr1	52113633	52114132	500	*	6.72	7.02	6.35	0.68	0.0931	1	130	81.32	X00002	ENSMUSG00000101628	52077261	52156087	+	inside	36621	36372	Overlapping	NA
chr1	52113633	52114132	500	*	6.72	7.02	6.35	0.68	0.0931	1	130	81.32	X00002	ENSMUSG00000026104	52119440	52161865	+	upstream	-5558	5308	NearestLocation	Stat1
chr7	101933702	101934201	500	*	6.85	7.14	6.49	0.65	0.0933	1	141	90.03	X00003	ENSMUSG00000064307	101912984	101933895	-	overlapStart	-57	193	NearestLocation	Lrrc51
chr9	118040126	118040625	500	*	8.05	8.25	7.81	0.44	0.0935	1	305	224.59	X00004	ENSMUSG00000032443	117876000	118040259	-	overlapStart	-117	133	NearestLocation	NA
chr9	118040126	118040625	500	*	8.05	8.25	7.81	0.44	0.0935	1	305	224.59	X00004	ENSMUSG00000039285	118040499	118069794	+	overlapStart	-123	126	NearestLocation	Azi2
chr4	44712793	44713292	500	*	7.4	7.11	7.65	-0.54	0.0947	1	138	200.39	X00005	ENSMUSG00000014030	44531145	44710487	-	upstream	-2555	2306	NearestLocation	Pax5
chr6	97487589	97488088	500	*	5.54	4.95	5.95	-1	0.0949	1	31	61.96	X00006	ENSMUSG00000030064	97286867	97617541	-	inside	129703	129453	Overlapping	Frmd4b
chr6	97487589	97488088	500	*	5.54	4.95	5.95	-1	0.0949	1	31	61.96	X00006	ENSMUSG00000064724	97547438	97547567	-	downstream	59729	59350	NearestLocation	NA
chr13	58128608	58129107	500	*	7.05	7.32	6.72	0.6	0.095	1	160	105.52	X00007	ENSMUSG00000007836	58125879	58128556	-	upstream	-302	52	NearestLocation	Hnrnpa0
chr8	126474647	126475146	500	*	7.27	7.52	6.96	0.56	0.0953	1	184	124.88	X00008	ENSMUSG00000090290	126426652	126475065	-	overlapStart	169	81	NearestLocation	Gm17296
chr17	50292865	50293364	500	*	6.21	6.55	5.76	0.79	0.0954	1	94	54.21	X00009	ENSMUSG00000010592	50279394	50293599	-	inside	485	235	NearestLocation	Dazl
chr13	119488038	119488537	500	*	6.89	7.17	6.54	0.63	0.0964	1	144	92.93	X00010	ENSMUSG00000074635	119487261	119488383	-	overlapStart	95	154	NearestLocation	3110070M22Rik
chr13	119488038	119488537	500	*	6.89	7.17	6.54	0.63	0.0964	1	144	92.93	X00010	ENSMUSG00000074634	119487941	119610458	+	inside	347	97	Overlapping	Gm7120
chr16	48993702	48994201	500	*	8.35	8.14	8.53	-0.39	0.0964	1	282	370.77	X00011	ENSMUSG00000064061	48924232	48994165	-	overlapStart	213	36	NearestLocation	Dzip3
chr16	48993702	48994201	500	*	8.35	8.14	8.53	-0.39	0.0964	1	282	370.77	X00011	ENSMUSG00000033031	48994185	49019709	+	overlapStart	-233	16	NearestLocation	C330027C09Rik
chr14	3049106	3049605	500	*	5.41	4.81	5.84	-1.03	0.0967	1	28	57.12	X00012	ENSMUSG00000079410	3049285	3076840	+	overlapStart	71	179	NearestLocation	Gm2897
chr7	127253974	127254473	500	*	7.88	8.09	7.63	0.46	0.0969	1	273	198.45	X00013	ENSMUSG00000054716	127244526	127254803	+	inside	9698	330	Overlapping	Zfp771
chr7	127253974	127254473	500	*	7.88	8.09	7.63	0.46	0.0969	1	273	198.45	X00013	ENSMUSG00000042462	127256959	127260709	-	downstream	6485	2486	NearestLocation	Dctpp1
chr19	8756899	8757398	500	*	6.51	6.82	6.1	0.72	0.097	1	113	68.73	X00014	ENSMUSG00000010097	8757073	8772475	+	overlapStart	75	174	NearestLocation	Nxf1;Tmem223
chr11	87852949	87853448	500	*	5.57	5.98	5	0.98	0.0972	1	63	31.95	X00015	ENSMUSG00000034121	87853215	87863803	+	overlapStart	-17	233	NearestLocation	Mks1
chr17	35823212	35823711	500	*	5.07	5.52	4.41	1.11	0.0974	1	46	21.3	X00016	ENSMUSG00000059714	35823230	35832791	+	overlapStart	232	18	NearestLocation	Flot1
chr7	19094688	19095187	500	*	6.37	6.7	5.95	0.75	0.0974	1	104	61.96	X00017	ENSMUSG00000040841	19094594	19098549	+	inside	344	94	NearestLocation	Six5
chr7	143748333	143748832	500	*	5.32	5.75	4.71	1.05	0.0976	1	54	26.14	X00018	ENSMUSG00000037606	143688762	143756985	-	inside	8403	8153	NearestLocation	Osbpl5
chr11	75794823	75795322	500	*	5.49	5.91	4.91	1	0.0979	1	60	30.01	X00019	ENSMUSG00000020848	75768966	75796049	-	inside	977	727	Overlapping	Doc2b
chr11	75794823	75795322	500	*	5.49	5.91	4.91	1	0.0979	1	60	30.01	X00019	ENSMUSG00000087059	75794768	75825241	+	inside	304	55	NearestLocation	NA
chr18	5591999	5592498	500	*	6.09	6.44	5.63	0.82	0.0985	1	87	49.37	X00021	ENSMUSG00000063087	5491503	5593505	-	inside	1257	1007	Overlapping	Gm10125
chr18	5591999	5592498	500	*	6.09	6.44	5.63	0.82	0.0985	1	87	49.37	X00021	ENSMUSG00000024238	5591860	5775467	+	inside	388	139	NearestLocation	Zeb1
chr15	98992986	98993485	500	*	6.52	6.83	6.12	0.71	0.0985	1	114	69.7	X00020	ENSMUSG00000097587	98985965	98989281	+	downstream	7271	3705	NearestLocation	4930578M01Rik
chr5	142629323	142629822	500	*	6.98	7.25	6.64	0.61	0.0987	1	152	99.71	X00022	ENSMUSG00000029578	142629542	142670588	+	overlapStart	30	219	NearestLocation	Wipi2
chr18	60848647	60849146	500	*	6.25	5.81	6.58	-0.78	0.0991	1	56	95.84	X00023	ENSMUSG00000024613	60813755	60848971	-	overlapStart	75	175	NearestLocation	Tcof1
chr8	83724709	83725208	500	*	6.13	5.67	6.48	-0.8	0.0996	1	51	89.06	X00024	ENSMUSG00000005481	83715177	83726892	+	inside	9781	1684	Overlapping	Ddx39
chr8	83724709	83725208	500	*	6.13	5.67	6.48	-0.8	0.0996	1	51	89.06	X00024	ENSMUSG00000002885	83723251	83741326	-	inside	16368	1458	Overlapping	Adgre5
chr8	83724709	83725208	500	*	6.13	5.67	6.48	-0.8	0.0996	1	51	89.06	X00024	ENSMUSG00000098465	83723878	83723984	-	upstream	-974	725	NearestLocation	Mir1668
chr2	27514879	27515378	500	*	6.6	6.91	6.22	0.69	0.1	1	120	74.54	X00025	ENSMUSG00000026917	27515157	27536535	+	overlapStart	-29	221	NearestLocation	Wdr5
chr4	46344699	46345198	500	*	6.55	6.86	6.16	0.7	0.101	1	116	71.64	X00030	ENSMUSG00000087383	46300007	46345515	-	inside	567	317	NearestLocation	NA
chr4	46344699	46345198	500	*	6.55	6.86	6.16	0.7	0.101	1	116	71.64	X00030	ENSMUSG00000070990	46343609	46346412	+	inside	1339	1090	Overlapping	Foxe1
chr4	132422257	132422756	500	*	7.17	7.43	6.86	0.57	0.101	1	172	116.17	X00026	ENSMUSG00000066043	132355923	132422489	-	overlapStart	-17	232	NearestLocation	Phactr4
chr10	4386849	4387348	500	*	7.52	7.75	7.25	0.51	0.101	1	216	151.99	X00027	ENSMUSG00000075327	4367074	4388108	-	inside	1010	760	NearestLocation	Zbtb2
chr7	41633000	41633499	500	*	6.69	6.32	6.99	-0.66	0.101	1	80	126.82	X00028	ENSMUSG00000074165	41633203	41651534	+	overlapStart	47	203	NearestLocation	Zfp788
chr17	22314554	22315053	500	*	5.44	4.86	5.86	-1	0.101	1	29	58.08	X00029	ENSMUSG00000033972	22337989	22361400	-	downstream	46596	22936	NearestLocation	Zfp944
chr12	17266371	17266870	500	*	6.43	6.74	6.02	0.72	0.102	1	107	64.86	X00033	ENSMUSG00000020571	17266545	17284770	+	overlapStart	75	174	NearestLocation	Pdia6
chr9	57940217	57940716	500	*	7.01	7.28	6.68	0.6	0.102	1	155	102.61	X00031	ENSMUSG00000038264	57940113	57962864	+	inside	353	104	NearestLocation	Sema7a
chr13	100832981	100833480	500	*	7.19	7.44	6.88	0.56	0.102	1	174	118.1	X00034	ENSMUSG00000021629	100802649	100833427	-	overlapStart	197	53	NearestLocation	Slc30a5
chr16	11143871	11144370	500	*	6.75	6.39	7.04	-0.65	0.102	1	84	131.66	X00035	ENSMUSG00000037965	11136592	11176393	-	inside	32273	7279	Overlapping	Zc3h7a
chr16	11143871	11144370	500	*	6.75	6.39	7.04	-0.65	0.102	1	84	131.66	X00035	ENSMUSG00000076258	11144125	11144181	+	includeFeature	-5	189	NearestLocation	NA
chr2	172831030	172831529	500	*	5.52	4.95	5.93	-0.98	0.102	1	31	60.99	X00032	ENSMUSG00000093160	172864264	172864341	-	downstream	33061	32735	NearestLocation	NA
chr16	97272194	97272693	500	*	5.31	4.7	5.73	-1.03	0.102	1	26	53.24	X00036	ENSMUSG00000040605	97356728	97439012	+	upstream	-84284	84035	NearestLocation	Bace2
chr3	144205071	144205570	500	*	6.37	6.69	5.95	0.73	0.103	1	103	61.96	X00040	ENSMUSG00000028266	144188530	144205220	-	overlapStart	-100	149	NearestLocation	Lmo4
chr2	155133568	155134067	500	*	6.57	6.87	6.18	0.69	0.103	1	117	72.6	X00039	ENSMUSG00000027598	155133509	155226855	+	inside	309	59	NearestLocation	Itch
chr4	133754206	133754705	500	*	6.63	6.93	6.26	0.67	0.103	1	122	76.48	X00037	ENSMUSG00000007880	133679008	133756769	-	inside	2313	2064	NearestLocation	Arid1a
chr18	57132687	57133186	500	*	5.89	5.39	6.26	-0.86	0.103	1	42	76.48	X00038	ENSMUSG00000024593	57133090	57297467	+	overlapStart	-154	96	NearestLocation	Megf10
chr5	92897895	92898394	500	*	5.63	6.02	5.08	0.94	0.104	1	65	33.88	X00041	ENSMUSG00000029381	92683435	92965318	+	inside	214709	66924	Overlapping	Shroom3
chr5	92897895	92898394	500	*	5.63	6.02	5.08	0.94	0.104	1	65	33.88	X00041	ENSMUSG00000097135	92804220	92809488	-	upstream	-88656	88407	NearestLocation	NA
chr7	16922371	16922870	500	*	5.63	6.02	5.08	0.94	0.104	1	65	33.88	X00042	ENSMUSG00000019370	16915379	16924114	-	inside	1494	1244	NearestLocation	Calm3
chr5	143254188	143254687	500	*	6.15	6.49	5.71	0.78	0.104	1	90	52.28	X00044	ENSMUSG00000046658	143249697	143270022	-	inside	15584	4491	NearestLocation	Zfp316
chr7	138846544	138847043	500	*	6.3	6.63	5.88	0.75	0.104	1	99	59.05	X00045	ENSMUSG00000041775	138835823	138846273	-	upstream	-521	271	NearestLocation	Mapk1ip1
chr7	138846544	138847043	500	*	6.3	6.63	5.88	0.75	0.104	1	99	59.05	X00045	ENSMUSG00000041769	138846079	138883057	+	inside	715	465	Overlapping	Ppp2r2d
chr9	75610590	75611089	500	*	7.25	6.95	7.5	-0.55	0.104	1	124	181.03	X00043	ENSMUSG00000032186	75565621	75611325	-	inside	485	236	NearestLocation	Tmod2
chr3	135423030	135423529	500	*	6.66	6.95	6.29	0.66	0.105	1	124	78.41	X00049	ENSMUSG00000028165	135406412	135423925	-	inside	645	396	NearestLocation	Cisd2
chr17	80480141	80480640	500	*	6.8	7.08	6.45	0.63	0.105	1	135	87.13	X00048	ENSMUSG00000024241	80393752	80480453	-	overlapStart	63	187	NearestLocation	Sos1
chr10	100487207	100487706	500	*	7.89	8.09	7.65	0.45	0.105	1	273	200.39	X00046	ENSMUSG00000036676	100443902	100487350	-	overlapStart	-106	143	NearestLocation	Tmtc3
chr3	80801697	80802196	500	*	5.25	4.64	5.68	-1.04	0.105	1	25	51.31	X00047	ENSMUSG00000033981	80681450	80802835	-	inside	889	639	NearestLocation	Gria2
chr8	12397186	12397685	500	*	6.46	6.77	6.06	0.71	0.106	1	109	66.8	X00050	ENSMUSG00000047935	12385771	12436750	+	inside	11665	11415	Overlapping	Gm5607
chr8	12397186	12397685	500	*	6.46	6.77	6.06	0.71	0.106	1	109	66.8	X00050	ENSMUSG00000096014	12395295	12400126	+	inside	2141	1891	Overlapping	Sox1
chr8	12397186	12397685	500	*	6.46	6.77	6.06	0.71	0.106	1	109	66.8	X00050	ENSMUSG00000092656	12396403	12396488	+	downstream	1033	698	NearestLocation	NA
chr9	110532540	110533039	500	*	7.39	7.62	7.1	0.52	0.106	1	197	137.47	X00051	ENSMUSG00000044791	110532597	110618633	+	overlapStart	193	57	NearestLocation	Setd2
chr7	27446154	27446653	500	*	5.63	5.09	6.02	-0.93	0.106	1	34	64.86	X00052	ENSMUSG00000011751	27356383	27447686	-	inside	1282	1033	NearestLocation	Sptbn4
chr5	137338164	137338663	500	*	5.66	6.04	5.12	0.92	0.107	1	66	34.85	X00054	ENSMUSG00000037344	137314558	137333597	-	upstream	-4817	4567	NearestLocation	Slc12a9
chr3	36065807	36066306	500	*	6.1	6.44	5.65	0.79	0.107	1	87	50.34	X00060	ENSMUSG00000027710	36066000	36092857	+	overlapStart	56	193	NearestLocation	Acad9
chr17	15527006	15527505	500	*	6.47	6.78	6.08	0.7	0.107	1	110	67.76	X00059	ENSMUSG00000014767	15499888	15528379	+	inside	27368	874	Overlapping	Tbp
chr17	15527006	15527505	500	*	6.47	6.78	6.08	0.7	0.107	1	110	67.76	X00059	ENSMUSG00000014771	15519208	15527301	-	overlapStart	45	204	NearestLocation	Pdcd2
chr5	130079368	130079867	500	*	6.61	6.91	6.24	0.67	0.107	1	120	75.51	X00058	ENSMUSG00000034118	130073326	130135729	+	inside	6292	6042	NearestLocation	Tpst1
chr5	134099420	134099919	500	*	6.68	6.97	6.31	0.66	0.107	1	125	79.38	X00056	ENSMUSG00000015944	134099711	134144343	+	overlapStart	-41	208	NearestLocation	Gatsl2
chr15	84922907	84923406	500	*	6.94	7.21	6.61	0.6	0.107	1	148	97.77	X00057	ENSMUSG00000016619	84923428	84942955	+	upstream	-272	22	NearestLocation	Nup50
chr11	3202176	3202675	500	*	7	7.27	6.68	0.59	0.107	1	154	102.61	X00055	ENSMUSG00000020457	3187360	3266415	-	inside	63989	14816	Overlapping	Drg1
chr11	3202176	3202675	500	*	7	7.27	6.68	0.59	0.107	1	154	102.61	X00055	ENSMUSG00000020454	3202392	3244588	+	overlapStart	34	216	NearestLocation	Eif4enif1
chr4	72200483	72200982	500	*	7.63	7.85	7.37	0.48	0.107	1	231	165.54	X00053	ENSMUSG00000008305	72117142	72200919	-	overlapStart	187	63	NearestLocation	Tle1
chr17	24695712	24696677	966	*	7.16	6.86	7.41	-0.55	0.107	1	116	170.38	X00061	ENSMUSG00000040888	24693191	24696156	-	overlapStart	-38	444	NearestLocation	Gfer
chr17	24695712	24696677	966	*	7.16	6.86	7.41	-0.55	0.107	1	116	170.38	X00061	ENSMUSG00000019320	24696234	24700529	+	overlapStart	-40	443	NearestLocation	Noxo1
chr6	135087836	135088335	500	*	5.15	5.58	4.54	1.05	0.108	1	48	23.23	X00063	ENSMUSG00000046733	135065651	135084709	+	downstream	22435	3127	NearestLocation	Gprc5a
chr9	75254214	75254713	500	*	5.58	5.98	5.04	0.94	0.108	1	63	32.91	X00062	ENSMUSG00000033590	75232014	75305451	+	inside	22450	22200	NearestLocation	Myo5c
chr7	141391949	141392448	500	*	6.28	6.6	5.86	0.74	0.109	1	97	58.08	X00068	ENSMUSG00000025503	141392199	141402968	+	overlapStart	-1	249	NearestLocation	Taldo1
chr5	115731689	115732188	500	*	6.56	6.86	6.18	0.68	0.109	1	116	72.6	X00065	ENSMUSG00000041609	115648175	115731621	-	upstream	-317	68	NearestLocation	Ccdc64
chr4	117887106	117887605	500	*	6.96	7.23	6.64	0.59	0.109	1	150	99.71	X00066	ENSMUSG00000033379	117884326	117887333	-	overlapStart	-23	227	NearestLocation	Atp6v0b
chr15	58823067	58823566	500	*	7.2	7.45	6.91	0.54	0.109	1	175	120.04	X00067	ENSMUSG00000062373	58782269	58823530	-	overlapStart	214	36	NearestLocation	Tmem65
chr8	45358326	45358825	500	*	6.38	5.98	6.69	-0.72	0.109	1	63	103.58	X00064	ENSMUSG00000070044	45336717	45382291	-	inside	23715	21609	NearestLocation	Fam149a
chr11	120549566	120550065	500	*	5.87	6.23	5.38	0.85	0.11	1	75	41.63	X00069	ENSMUSG00000061111	120542888	120549727	-	overlapStart	-89	161	NearestLocation	Fam195b
chr11	120549566	120550065	500	*	5.87	6.23	5.38	0.85	0.11	1	75	41.63	X00069	ENSMUSG00000025129	120549979	120551132	-	overlapEnd	1316	86	Overlapping	Ppp1r27
chr7	44896019	44896518	500	*	6.21	6.54	5.79	0.75	0.11	1	93	55.18	X00071	ENSMUSG00000011658	44896079	44902631	+	overlapStart	189	60	NearestLocation	Fuz
chr6	35133616	35134115	500	*	6.64	6.93	6.28	0.66	0.11	1	122	77.45	X00070	ENSMUSG00000038784	35022066	35133737	-	overlapStart	-129	121	NearestLocation	Cnot4
chr11	86201023	86201522	500	*	5.34	5.75	4.76	0.99	0.111	1	54	27.11	X00073	ENSMUSG00000034329	86058138	86201193	-	overlapStart	-79	170	NearestLocation	Brip1
chr11	86201023	86201522	500	*	5.34	5.75	4.76	0.99	0.111	1	54	27.11	X00073	ENSMUSG00000085208	86201370	86304443	+	overlapStart	-98	152	NearestLocation	NA
chr17	71782801	71783300	500	*	6.14	6.48	5.71	0.77	0.111	1	89	52.28	X00077	ENSMUSG00000024059	71781947	71858351	+	inside	1103	854	NearestLocation	Clip4
chr12	116262692	116263191	500	*	6.3	6.61	5.88	0.73	0.111	1	98	59.05	X00075	ENSMUSG00000042050	116207050	116263025	-	overlapStart	83	166	NearestLocation	Wdr60
chr8	124862925	124863424	500	*	6.92	7.19	6.6	0.59	0.111	1	146	96.81	X00076	ENSMUSG00000090118	124831698	124863703	+	inside	31476	279	Overlapping	NA
chr8	124862925	124863424	500	*	6.92	7.19	6.6	0.59	0.111	1	146	96.81	X00076	ENSMUSG00000031984	124839355	124863029	-	overlapStart	-145	104	NearestLocation	2810004N23Rik
chr8	124862925	124863424	500	*	6.92	7.19	6.6	0.59	0.111	1	146	96.81	X00076	ENSMUSG00000031985	124863033	124890057	+	overlapStart	141	108	NearestLocation	Gnpat
chr1	137898355	137898854	500	*	5.58	5.04	5.98	-0.93	0.111	1	33	62.92	X00072	ENSMUSG00000098243	137898595	138000384	+	overlapStart	9	240	NearestLocation	NA
chr2	74740160	74740659	500	*	5.29	4.7	5.71	-1.01	0.111	1	26	52.28	X00074	ENSMUSG00000079277	74711927	74748442	+	inside	28483	7783	Overlapping	Hoxd3;Hoxd4
chr2	74740160	74740659	500	*	5.29	4.7	5.71	-1.01	0.111	1	26	52.28	X00074	ENSMUSG00000100642	74726728	74747918	+	inside	13682	7259	Overlapping	NA
chr2	74740160	74740659	500	*	5.29	4.7	5.71	-1.01	0.111	1	26	52.28	X00074	ENSMUSG00000085015	74752684	74753744	+	upstream	-12274	12025	NearestLocation	LOC102634401
chrX	36328989	36329488	500	*	5.89	6.25	5.41	0.84	0.112	1	76	42.59	X00080	ENSMUSG00000016239	36328353	36362341	+	inside	885	636	NearestLocation	Lonrf3
chr5	119680479	119680978	500	*	6.37	6.69	5.98	0.71	0.112	1	103	62.92	X00078	ENSMUSG00000087516	119611263	119671365	-	upstream	-9363	9114	NearestLocation	AW549542
chr5	119680479	119680978	500	*	6.37	6.69	5.98	0.71	0.112	1	103	62.92	X00078	ENSMUSG00000018604	119670669	119684724	+	inside	10059	3746	Overlapping	Tbx3
chr16	44139720	44140219	500	*	6.52	6.82	6.14	0.68	0.112	1	113	70.67	X00079	ENSMUSG00000022698	44139830	44163366	+	overlapStart	140	110	NearestLocation	Naa50
chr15	85131822	85132321	500	*	7.77	7.52	7.98	-0.45	0.112	1	184	251.7	X00081	ENSMUSG00000022432	85064691	85131957	-	overlapStart	-115	135	NearestLocation	Smc1b
chr15	85131822	85132321	500	*	7.77	7.52	7.98	-0.45	0.112	1	184	251.7	X00081	ENSMUSG00000022431	85132099	85144569	+	overlapStart	-27	222	NearestLocation	Ribc2
chr11	5886188	5886687	500	*	6.07	6.41	5.63	0.78	0.113	1	85	49.37	X00082	ENSMUSG00000020471	5872180	5878292	-	upstream	-8146	7896	NearestLocation	Pold2
chr2	181459007	181459506	500	*	6.16	6.49	5.73	0.76	0.113	1	90	53.24	X00086	ENSMUSG00000027583	181387762	181459426	-	overlapStart	170	80	NearestLocation	Zbtb46
chr17	51812690	51813189	500	*	6.39	6.7	6	0.7	0.113	1	104	63.89	X00085	ENSMUSG00000023927	51736187	51833290	-	inside	20350	20101	Overlapping	Satb1
chr17	51812690	51813189	500	*	6.39	6.7	6	0.7	0.113	1	104	63.89	X00085	ENSMUSG00000103216	51796017	51799190	-	upstream	-13750	13500	NearestLocation	NA
chr16	96191918	96192417	500	*	6.74	7.02	6.4	0.63	0.113	1	130	84.22	X00084	ENSMUSG00000045275	96158407	96192257	-	overlapStart	89	160	NearestLocation	Lca5l
chr1	12992212	12992711	500	*	6.35	5.95	6.67	-0.71	0.113	1	62	101.65	X00083	ENSMUSG00000025938	12866549	12992650	-	overlapStart	188	61	NearestLocation	Slco5a1
chr14	54686130	54686629	500	*	6.47	6.77	6.08	0.69	0.114	1	109	67.76	X00087	ENSMUSG00000022185	54642161	54686931	-	inside	551	302	Overlapping	Acin1
chr14	54686130	54686629	500	*	6.47	6.77	6.08	0.69	0.114	1	109	67.76	X00087	ENSMUSG00000040822	54686171	54690742	+	overlapStart	209	41	NearestLocation	1700123O20Rik
chr18	34776953	34777452	500	*	7.25	7.49	6.96	0.53	0.114	1	180	124.88	X00088	ENSMUSG00000038773	34777008	34839370	+	overlapStart	194	55	NearestLocation	Kdm3b
chr10	80602732	80603231	500	*	7.42	7.64	7.14	0.5	0.114	1	200	141.34	X00090	ENSMUSG00000035370	80602880	80615783	+	overlapStart	102	148	NearestLocation	Adat3
chr10	80602732	80603231	500	*	7.42	7.64	7.14	0.5	0.114	1	200	141.34	X00090	ENSMUSG00000078441	80602882	80615783	+	overlapStart	100	150	NearestLocation	Scamp4
chr15	94403939	94404438	500	*	6.18	5.75	6.51	-0.75	0.114	1	54	91	X00089	ENSMUSG00000022449	94270163	94465418	-	inside	61230	60980	NearestLocation	Adamts20
chr10	81288248	81288747	500	*	5.46	4.91	5.86	-0.95	0.114	1	30	58.08	X00091	ENSMUSG00000034917	81273207	81291267	-	inside	2769	2520	NearestLocation	Tjp3
chr10	85127851	85128350	500	*	5.38	5.78	4.81	0.97	0.115	1	55	28.07	X00094	ENSMUSG00000049038	85119435	85128027	-	overlapStart	-73	176	NearestLocation	Mterf2
chr8	84687368	84687867	500	*	6.41	6.71	6.02	0.69	0.115	1	105	64.86	X00093	ENSMUSG00000001910	84670483	84687862	-	overlapStart	244	5	NearestLocation	Nacc1
chr8	84687368	84687867	500	*	6.41	6.71	6.02	0.69	0.115	1	105	64.86	X00093	ENSMUSG00000001909	84686307	84699808	+	inside	1311	1061	Overlapping	Trmt1
chrX	12761684	12762183	500	*	6.48	6.78	6.1	0.68	0.115	1	110	68.73	X00095	ENSMUSG00000064127	12675369	12762073	-	overlapStart	139	110	NearestLocation	Med14
chr11	115708378	115708877	500	*	8	8.19	7.77	0.42	0.115	1	292	218.78	X00092	ENSMUSG00000059923	115644045	115708597	-	overlapStart	-31	219	NearestLocation	Grb2
chr7	45699838	45700337	500	*	6.43	6.04	6.73	-0.69	0.115	1	66	106.49	X00096	ENSMUSG00000003273	45699843	45704682	+	overlapStart	245	5	NearestLocation	Car11
chr1	83345514	83346013	500	*	4.79	5.25	4.12	1.12	0.116	1	38	17.43	X00098	ENSMUSG00000026163	83254139	83408200	-	inside	62436	62187	Overlapping	Sphkap
chr1	83345514	83346013	500	*	4.79	5.25	4.12	1.12	0.116	1	38	17.43	X00098	ENSMUSG00000104374	83331298	83332586	-	upstream	-13178	12928	NearestLocation	NA
chr10	80138661	80139160	500	*	7.26	6.98	7.5	-0.52	0.116	1	126	181.03	X00097	ENSMUSG00000035640	80130451	80140835	-	inside	1925	1675	Overlapping	Cbarp
chr10	80138661	80139160	500	*	7.26	6.98	7.5	-0.52	0.116	1	126	181.03	X00097	ENSMUSG00000003072	80138632	80145818	+	inside	278	29	NearestLocation	Atp5d
chr5	92042437	92042936	500	*	6.2	5.78	6.52	-0.74	0.116	1	55	91.97	X00100	ENSMUSG00000029403	92006074	92043042	-	inside	356	106	NearestLocation	Cdkl2
chr14	12345682	12346181	500	*	5.92	5.46	6.28	-0.82	0.116	1	44	77.45	X00099	ENSMUSG00000021743	12341892	12345865	-	overlapStart	-67	183	NearestLocation	Fezf2
chr17	57247615	57248114	500	*	7.11	7.36	6.81	0.55	0.117	1	164	112.3	X00101	ENSMUSG00000005823	57234914	57247641	-	overlapStart	-223	26	NearestLocation	Gpr108
chr6	47739993	47740492	500	*	4.36	3.58	4.86	-1.28	0.117	1	12	29.04	X00102	ENSMUSG00000094807	47773329	47773429	+	upstream	-33087	32837	NearestLocation	NA
chr1	185253089	185253588	500	*	5.13	5.55	4.54	1.02	0.118	1	47	23.23	X00104	ENSMUSG00000039318	185204117	185286759	+	inside	49221	33171	Overlapping	Rab3gap2
chr1	185253089	185253588	500	*	5.13	5.55	4.54	1.02	0.118	1	47	23.23	X00104	ENSMUSG00000103613	185243713	185247889	-	upstream	-5449	5200	NearestLocation	Gm34882
chr4	138455139	138455638	500	*	6.99	7.25	6.68	0.57	0.118	1	152	102.61	X00103	ENSMUSG00000046447	138454314	138460123	+	inside	1074	825	NearestLocation	Camk2n1
chr9	113741342	113741841	500	*	7	7.26	6.69	0.56	0.119	1	153	103.58	X00105	ENSMUSG00000032504	113651744	113708259	-	upstream	-33333	33083	NearestLocation	Pdcd6ip
chr8	90908077	90908576	500	*	7.46	7.69	7.2	0.49	0.119	1	206	147.15	X00110	ENSMUSG00000056608	90828835	91054508	+	inside	79491	79242	Overlapping	Chd9
chr8	90908077	90908576	500	*	7.46	7.69	7.2	0.49	0.119	1	206	147.15	X00110	ENSMUSG00000074171	90907939	90908415	-	overlapStart	89	138	NearestLocation	NA
chr7	89632728	89633227	500	*	6.22	5.81	6.54	-0.73	0.119	1	56	92.93	X00106	ENSMUSG00000092071	89632097	89633124	-	overlapStart	146	103	NearestLocation	NA
chr7	89632728	89633227	500	*	6.22	5.81	6.54	-0.73	0.119	1	56	92.93	X00106	ENSMUSG00000030621	89632392	89854359	+	inside	586	336	Overlapping	Me3
chr16	78427575	78428074	500	*	5.49	4.95	5.88	-0.93	0.119	1	31	59.05	X00107	ENSMUSG00000064862	78423730	78423859	-	upstream	-3965	3716	NearestLocation	NA
chr6	52262902	52263401	500	*	5.49	4.95	5.88	-0.93	0.119	1	31	59.05	X00108	ENSMUSG00000099173	52262592	52262969	+	overlapEnd	560	67	Overlapping	NA
chr6	52262902	52263401	500	*	5.49	4.95	5.88	-0.93	0.119	1	31	59.05	X00108	ENSMUSG00000055408	52262775	52267603	+	inside	377	127	Overlapping	Hottip
chr6	52262902	52263401	500	*	5.49	4.95	5.88	-0.93	0.119	1	31	59.05	X00108	ENSMUSG00000099229	52263058	52263418	+	overlapStart	94	17	NearestLocation	NA
chr9	40346294	40346793	500	*	5.49	4.95	5.88	-0.93	0.119	1	31	59.05	X00109	ENSMUSG00000040111	40293233	40531383	-	inside	184839	53061	Overlapping	Gramd1b
chr9	40346294	40346793	500	*	5.49	4.95	5.88	-0.93	0.119	1	31	59.05	X00109	ENSMUSG00000087047	40323426	40343564	+	downstream	23118	2730	NearestLocation	NA
chr4	129057844	129058343	500	*	6.38	6.69	6	0.69	0.12	1	103	63.89	X00112	ENSMUSG00000085085	129050097	129057983	-	overlapStart	-111	139	NearestLocation	1700086P04Rik
chr4	129057844	129058343	500	*	6.38	6.69	6	0.69	0.12	1	103	63.89	X00112	ENSMUSG00000028793	129058271	129085886	+	overlapStart	-177	72	NearestLocation	Rnf19b
chr13	119428506	119429005	500	*	6.95	7.21	6.64	0.57	0.12	1	148	99.71	X00111	ENSMUSG00000025451	119428601	119458218	+	overlapStart	155	95	NearestLocation	Paip1
chr13	30659687	30660186	500	*	5.88	6.23	5.41	0.82	0.121	1	75	42.59	X00113	ENSMUSG00000069255	30659999	30711231	+	overlapStart	-63	187	NearestLocation	Dusp22
chr6	116193260	116193759	500	*	6.64	6.29	6.92	-0.63	0.121	1	78	121.01	X00114	ENSMUSG00000030126	116018618	116193486	-	overlapStart	-24	226	NearestLocation	Tmcc1
chr11	48837495	48837994	500	*	6.59	6.23	6.87	-0.64	0.121	1	75	117.14	X00115	ENSMUSG00000078154	48825346	48826655	-	upstream	-11089	10840	NearestLocation	NA
chr11	48837495	48837994	500	*	6.59	6.23	6.87	-0.64	0.121	1	75	117.14	X00115	ENSMUSG00000040350	48826140	48852209	+	inside	11604	11355	Overlapping	Trim7
chr7	16286323	16286822	500	*	6.4	6.7	6.02	0.68	0.122	1	104	64.86	X00117	ENSMUSG00000041375	16274042	16286795	-	overlapStart	223	27	NearestLocation	Ccdc9
chr17	43016516	43017015	500	*	7.05	6.75	7.3	-0.55	0.122	1	108	157.79	X00118	ENSMUSG00000023915	43016555	43089188	+	overlapStart	211	39	NearestLocation	Tnfrsf21
chr11	71033064	71033563	500	*	6.9	6.58	7.16	-0.58	0.122	1	96	143.27	X00116	ENSMUSG00000018451	71031941	71033513	-	overlapStart	199	50	NearestLocation	NA
chr8	88521281	88521780	500	*	5.9	6.25	5.45	0.8	0.123	1	76	43.56	X00119	ENSMUSG00000031661	88521344	88594887	+	overlapStart	186	63	NearestLocation	Nkd1
chr5	114941949	114942448	500	*	6.17	6.49	5.76	0.73	0.123	1	90	54.21	X00120	ENSMUSG00000029559	114942158	114949783	+	overlapStart	40	209	NearestLocation	2210016L21Rik
chr11	98673059	98673558	500	*	5.44	4.91	5.84	-0.93	0.123	1	30	57.12	X00121	ENSMUSG00000017204	98664351	98677708	+	inside	8957	4150	NearestLocation	Gsdma
chr17	31564160	31564659	500	*	5.63	6	5.12	0.88	0.124	1	64	34.85	X00124	ENSMUSG00000006705	31564749	31607684	+	upstream	-339	90	NearestLocation	Pknox1
chr2	3418824	3419323	500	*	5.63	6	5.12	0.88	0.124	1	64	34.85	X00125	ENSMUSG00000026650	3409043	3422648	-	inside	3574	3325	NearestLocation	Meig1
chr2	179975159	179975658	500	*	5.72	6.09	5.24	0.85	0.124	1	68	37.75	X00126	ENSMUSG00000039117	179912146	179976646	-	inside	1238	988	Overlapping	Taf4
chr2	179975159	179975658	500	*	5.72	6.09	5.24	0.85	0.124	1	68	37.75	X00126	ENSMUSG00000085704	179975993	179979013	+	upstream	-585	335	NearestLocation	4921531C22Rik
chr10	80826686	80827185	500	*	6.34	6.64	5.95	0.69	0.124	1	100	61.96	X00123	ENSMUSG00000035242	80826656	80829290	+	inside	280	30	NearestLocation	Oaz1
chr17	56256148	56256647	500	*	7.61	7.82	7.36	0.46	0.124	1	226	164.57	X00122	ENSMUSG00000043683	56256793	56263608	+	upstream	-395	146	NearestLocation	Fem1a
chr9	121697447	121697946	500	*	6.93	6.61	7.18	-0.57	0.125	1	98	145.21	X00127	ENSMUSG00000061536	121680047	121705490	-	inside	7794	7544	NearestLocation	Sec22c
chr4	41498220	41498719	500	*	5.76	5.29	6.12	-0.84	0.125	1	39	69.7	X00128	ENSMUSG00000046312	41495604	41503076	-	inside	4606	2616	NearestLocation	AI464131
chr9	102352774	102353273	500	*	5.55	5.93	5.04	0.89	0.126	1	61	32.91	X00137	ENSMUSG00000032537	101922128	102354693	-	inside	1669	1420	NearestLocation	Ephb1
chr9	102352774	102353273	500	*	5.55	5.93	5.04	0.89	0.126	1	61	32.91	X00137	ENSMUSG00000097524	102345903	102354694	+	inside	7121	1421	Overlapping	NA
chr4	43875549	43876048	500	*	5.93	6.27	5.48	0.79	0.126	1	77	44.53	X00129	ENSMUSG00000028476	43875530	43944806	+	inside	268	19	NearestLocation	Reck
chr8	123041793	123042292	500	*	5.93	6.27	5.48	0.79	0.126	1	77	44.53	X00130	ENSMUSG00000092329	119910841	124345722	+	inside	3131201	1303430	Overlapping	Galnt2
chr8	123041793	123042292	500	*	5.93	6.27	5.48	0.79	0.126	1	77	44.53	X00130	ENSMUSG00000099881	123042466	123044602	+	upstream	-424	174	NearestLocation	2810013P06Rik
chr4	134102393	134102892	500	*	6.28	6.58	5.88	0.7	0.126	1	96	59.05	X00131	ENSMUSG00000012126	134102570	134127593	+	overlapStart	72	177	NearestLocation	Ubxn11
chr12	54862316	54862815	500	*	6.8	7.07	6.48	0.59	0.126	1	134	89.06	X00134	ENSMUSG00000062929	54858817	54862877	-	inside	311	62	NearestLocation	Cfl2
chr13	76098459	76098958	500	*	7.01	7.26	6.71	0.55	0.126	1	153	104.55	X00132	ENSMUSG00000021592	76060422	76098660	-	overlapStart	-48	201	NearestLocation	Arsk
chr13	76098459	76098958	500	*	7.01	7.26	6.71	0.55	0.126	1	153	104.55	X00132	ENSMUSG00000033991	76098734	76187983	+	overlapStart	-26	224	NearestLocation	Ttc37
chr9	82975278	82975777	500	*	7.01	7.26	6.71	0.55	0.126	1	153	104.55	X00133	ENSMUSG00000032253	82866159	82975516	-	overlapStart	-12	238	NearestLocation	Phip
chr12	28649372	28649871	500	*	6.14	5.73	6.46	-0.73	0.126	1	53	88.09	X00135	ENSMUSG00000020630	28649602	28659591	+	overlapStart	20	230	NearestLocation	Rnaseh1
chr13	3478076	3478575	500	*	5.31	4.75	5.71	-0.95	0.126	1	27	52.28	X00136	ENSMUSG00000097709	3478230	3501393	+	overlapStart	96	154	NearestLocation	2810429I04Rik
chr2	152293832	152294331	500	*	6.21	6.52	5.81	0.71	0.127	1	92	56.15	X00140	ENSMUSG00000027465	152293828	152313996	+	inside	254	4	NearestLocation	Tbc1d20
chr17	35134996	35135495	500	*	6.81	7.08	6.49	0.58	0.127	1	135	90.03	X00139	ENSMUSG00000024392	35135178	35147322	+	overlapStart	68	182	NearestLocation	Bag6
chr17	36271324	36271823	500	*	7.02	7.27	6.72	0.55	0.127	1	154	105.52	X00138	ENSMUSG00000045409	36258873	36272247	-	inside	673	424	NearestLocation	Trim39
chr13	36612880	36613379	500	*	5.66	6.02	5.16	0.86	0.128	1	65	35.82	X00143	ENSMUSG00000077282	36654405	36654536	+	upstream	-41275	41026	NearestLocation	NA
chr5	142702029	142702528	500	*	5.66	6.02	5.16	0.86	0.128	1	65	35.82	X00144	ENSMUSG00000050822	142702101	142722490	+	overlapStart	177	72	NearestLocation	Slc29a4
chr12	110375066	110375565	500	*	5.75	6.11	5.28	0.83	0.128	1	69	38.72	X00141	ENSMUSG00000075707	110279068	110281097	+	downstream	96248	93969	NearestLocation	Dio3
chr10	120476803	120477302	500	*	6.37	6.67	6	0.67	0.128	1	102	63.89	X00147	ENSMUSG00000056758	120361275	120476469	-	upstream	-583	334	NearestLocation	Hmga2
chr10	95940727	95941226	500	*	6.96	7.21	6.65	0.56	0.128	1	148	100.68	X00142	ENSMUSG00000036499	95940663	96045518	+	inside	313	64	NearestLocation	Eea1
chr9	57764951	57765450	500	*	7.55	7.76	7.3	0.46	0.128	1	217	157.79	X00148	ENSMUSG00000032316	57750711	57765860	-	inside	660	410	NearestLocation	Clk3
chr1	150393012	150393511	500	*	8.13	8.31	7.93	0.38	0.128	1	318	243.95	X00146	ENSMUSG00000006010	150361305	150393080	-	overlapStart	-182	68	NearestLocation	BC003331
chr1	150393012	150393511	500	*	8.13	8.31	7.93	0.38	0.128	1	318	243.95	X00146	ENSMUSG00000006005	150392838	150449935	+	inside	424	174	Overlapping	Tpr
chr15	83149048	83149547	500	*	8.78	8.93	8.63	0.3	0.128	1	487	394.97	X00149	ENSMUSG00000041815	83125978	83149384	-	overlapStart	86	163	NearestLocation	Poldip3
chr16	94078148	94078647	500	*	5.48	4.95	5.86	-0.91	0.128	1	31	58.08	X00150	ENSMUSG00000062713	94085260	94127032	+	upstream	-6862	6613	NearestLocation	Sim2
chr5	37288526	37289025	500	*	5.16	4.58	5.57	-0.98	0.128	1	24	47.44	X00145	ENSMUSG00000029121	37242080	37292132	+	inside	46696	3107	NearestLocation	Crmp1
chr9	74850467	74850966	500	*	5.01	5.43	4.41	1.01	0.129	1	43	21.3	X00156	ENSMUSG00000066477	74847983	74860134	+	inside	2733	2484	Overlapping	Gm16551
chr9	74850467	74850966	500	*	5.01	5.43	4.41	1.01	0.129	1	43	21.3	X00156	ENSMUSG00000093662	74848463	74891476	+	inside	2253	2004	NearestLocation	NA
chr9	95857546	95858045	500	*	6.91	7.16	6.6	0.56	0.129	1	143	96.81	X00159	ENSMUSG00000096655	95855418	95858322	-	inside	526	277	Overlapping	1700065D16Rik
chr9	95857546	95858045	500	*	6.91	7.16	6.6	0.56	0.129	1	143	96.81	X00159	ENSMUSG00000032409	95857597	95951644	+	overlapStart	199	51	NearestLocation	Atr
chr11	4947340	4947839	500	*	7.23	7.46	6.95	0.51	0.129	1	176	123.91	X00154	ENSMUSG00000020396	4938754	4948064	-	inside	474	225	NearestLocation	Nefh
chr11	72795932	72796431	500	*	7.46	7.67	7.2	0.47	0.129	1	204	147.15	X00158	ENSMUSG00000057778	72777232	72796142	-	overlapStart	-40	210	NearestLocation	Cyb5d2
chr11	72795932	72796431	500	*	7.46	7.67	7.2	0.47	0.129	1	204	147.15	X00158	ENSMUSG00000055670	72796226	72927120	+	overlapStart	-44	205	NearestLocation	Zzef1
chr7	123500407	123500906	500	*	9.24	9.11	9.36	-0.25	0.129	1	552	656.35	X00151	ENSMUSG00000030757	123479516	123500449	-	overlapStart	-207	42	NearestLocation	Zkscan2
chr1	167393909	167394408	500	*	6.29	5.91	6.6	-0.69	0.129	1	60	96.81	X00160	ENSMUSG00000026688	167371966	167393841	-	upstream	-317	68	NearestLocation	Mgst3
chr3	89159787	89160286	500	*	6.29	5.91	6.6	-0.69	0.129	1	60	96.81	X00161	ENSMUSG00000028051	89146074	89160196	-	overlapStart	160	90	NearestLocation	Hcn3
chr1	11413984	11414483	500	*	6.23	5.83	6.54	-0.71	0.129	1	57	92.93	X00157	ENSMUSG00000057715	11414105	11975901	+	overlapStart	129	121	NearestLocation	A830018L16Rik
chr7	80534849	80535348	500	*	6.16	5.75	6.48	-0.72	0.129	1	54	89.06	X00152	ENSMUSG00000030528	80454993	80535119	-	overlapStart	21	229	NearestLocation	Blm
chr9	40875421	40875920	500	*	6.16	5.75	6.48	-0.72	0.129	1	54	89.06	X00153	ENSMUSG00000054360	40874127	40877972	+	inside	1543	1294	NearestLocation	Bsx
chr6	122740048	122740547	500	*	4.99	4.39	5.41	-1.02	0.129	1	21	42.59	X00155	ENSMUSG00000012396	122707489	122714633	+	downstream	32809	25415	NearestLocation	Nanog
chr6	122740048	122740547	500	*	4.99	4.39	5.41	-1.02	0.129	1	21	42.59	X00155	ENSMUSG00000003153	122727809	122801640	-	inside	61342	12239	Overlapping	Slc2a3
chr7	144838553	144839052	500	*	5.39	5.78	4.86	0.92	0.13	1	55	29.04	X00162	ENSMUSG00000031074	144838083	144844436	+	inside	719	470	NearestLocation	Fgf3
chr15	27783521	27784020	500	*	5.58	5.95	5.08	0.87	0.13	1	62	33.88	X00163	ENSMUSG00000056069	27655071	27681542	-	upstream	-102228	101979	NearestLocation	Fam105a
chr15	27783521	27784020	500	*	5.58	5.95	5.08	0.87	0.13	1	62	33.88	X00163	ENSMUSG00000022263	27730652	28025848	-	inside	242078	52869	Overlapping	Trio
chr16	30309399	30309898	500	*	5.72	5.25	6.08	-0.83	0.13	1	38	67.76	X00164	ENSMUSG00000047953	30307686	30310779	-	inside	1131	881	NearestLocation	Gp5
chr17	27819985	27820484	500	*	6.07	6.39	5.65	0.74	0.131	1	84	50.34	X00167	ENSMUSG00000056692	27751232	27820558	-	inside	324	74	NearestLocation	D17Wsu92e
chr2	31640164	31640663	500	*	6.63	6.91	6.29	0.61	0.131	1	120	78.41	X00169	ENSMUSG00000085224	31633453	31640589	-	overlapStart	175	74	NearestLocation	NA
chr2	31640164	31640663	500	*	6.63	6.91	6.29	0.61	0.131	1	120	78.41	X00169	ENSMUSG00000079466	31640037	31655795	+	inside	377	127	Overlapping	Prdm12
chr3	139075340	139075839	500	*	6.63	6.91	6.29	0.61	0.131	1	120	78.41	X00170	ENSMUSG00000028149	138925906	139075199	-	upstream	-391	141	NearestLocation	Rap1gds1
chr18	6516080	6516579	500	*	6.71	6.98	6.38	0.6	0.131	1	126	83.25	X00172	ENSMUSG00000024240	6435951	6516108	-	overlapStart	-222	28	NearestLocation	Epc1
chr18	35498599	35499098	500	*	6.85	7.11	6.54	0.57	0.131	1	138	92.93	X00168	ENSMUSG00000024357	35266400	35498925	-	overlapStart	77	173	NearestLocation	Sil1
chr9	25151493	25151992	500	*	7.63	7.83	7.39	0.45	0.131	1	228	167.48	X00166	ENSMUSG00000008429	25108130	25151781	-	overlapStart	39	211	NearestLocation	Herpud2
chr4	89310426	89310925	500	*	6.71	6.38	6.98	-0.6	0.131	1	83	125.85	X00165	ENSMUSG00000073802	89306289	89311032	-	inside	356	107	NearestLocation	Cdkn2b
chr14	5001005	5001883	879	*	4.58	3.91	5.04	-1.13	0.131	1	15	32.91	X00171	ENSMUSG00000079383	5015891	5019119	+	upstream	-14447	14008	NearestLocation	NA
chr2	69822611	69823110	500	*	6.25	6.55	5.86	0.69	0.132	1	94	58.08	X00173	ENSMUSG00000042155	69821944	69836651	+	inside	916	667	NearestLocation	Klhl23
chr5	110653176	110653675	500	*	7.19	7.43	6.92	0.51	0.132	1	172	121.01	X00175	ENSMUSG00000033294	110648418	110653417	-	overlapStart	-9	241	NearestLocation	Noc4l
chr5	110653176	110653675	500	*	7.19	7.43	6.92	0.51	0.132	1	172	121.01	X00175	ENSMUSG00000029504	110653451	110660496	+	overlapStart	-25	224	NearestLocation	Ddx51
chr2	18677083	18678027	945	*	7.37	7.59	7.11	0.48	0.132	1	193	138.43	X00177	ENSMUSG00000026739	18677018	18686629	+	inside	537	65	NearestLocation	Bmi1
chr19	6974241	6974740	500	*	6.31	5.93	6.61	-0.68	0.132	1	61	97.77	X00176	ENSMUSG00000056612	6975048	6977324	+	upstream	-558	308	NearestLocation	Ppp1r14b
chr17	45663211	45663710	500	*	6.18	5.78	6.49	-0.71	0.132	1	55	90.03	X00174	ENSMUSG00000036026	45660171	45686905	-	inside	23445	3040	Overlapping	Tmem63b
chr17	45663211	45663710	500	*	6.18	5.78	6.49	-0.71	0.132	1	55	90.03	X00174	ENSMUSG00000086472	45663519	45666209	+	overlapStart	-59	191	NearestLocation	NA
chr7	84689495	84689994	500	*	6.42	6.71	6.06	0.65	0.133	1	105	66.8	X00180	ENSMUSG00000085236	84689640	84776549	+	overlapStart	104	145	NearestLocation	NA
chr4	46451066	46451565	500	*	6.72	6.99	6.4	0.59	0.133	1	127	84.22	X00179	ENSMUSG00000028333	46450902	46472657	+	inside	414	164	NearestLocation	Anp32b
chr10	120477428	120477927	500	*	5.58	5.09	5.95	-0.87	0.133	1	34	61.96	X00178	ENSMUSG00000056758	120361275	120476469	-	upstream	-1209	959	NearestLocation	Hmga2
chr2	91202698	91203197	500	*	5.43	5.81	4.91	0.9	0.134	1	56	30.01	X00184	ENSMUSG00000002108	91184061	91202834	-	overlapStart	-114	136	NearestLocation	Nr1h3
chr2	91202698	91203197	500	*	5.43	5.81	4.91	0.9	0.134	1	56	30.01	X00184	ENSMUSG00000086206	91195906	91202778	-	overlapStart	-170	80	NearestLocation	NA
chr2	91202698	91203197	500	*	5.43	5.81	4.91	0.9	0.134	1	56	30.01	X00184	ENSMUSG00000002103	91202885	91214098	+	overlapStart	63	187	NearestLocation	Acp2
chr2	71162828	71163327	500	*	6.18	6.49	5.79	0.71	0.134	1	90	55.18	X00181	ENSMUSG00000027015	71117923	71142926	+	downstream	45155	19902	NearestLocation	Cybrd1
chr4	34882597	34883096	500	*	6.95	7.2	6.65	0.55	0.134	1	147	100.68	X00182	ENSMUSG00000039967	34803113	34882960	-	overlapStart	114	136	NearestLocation	Zfp292
chr5	147400166	147400665	500	*	6.73	6.41	7	-0.59	0.134	1	85	127.78	X00183	ENSMUSG00000042817	147330741	147400489	-	overlapStart	73	176	NearestLocation	Flt3
chr5	147400166	147400665	500	*	6.73	6.41	7	-0.59	0.134	1	85	127.78	X00183	ENSMUSG00000097228	147399554	147401917	+	inside	862	612	Overlapping	NA
chr4	134534905	134535404	500	*	8.2	8	8.37	-0.37	0.135	1	256	330.11	X00185	ENSMUSG00000046671	134525550	134535387	-	overlapStart	233	17	NearestLocation	Mtfr1l
chr14	120137805	120138304	500	*	6.2	6.51	5.81	0.7	0.136	1	91	56.15	X00187	ENSMUSG00000044819	120019585	120042435	-	upstream	-95619	95370	NearestLocation	Oxgr1
chr4	34886517	34887016	500	*	6.37	6.66	6	0.66	0.136	1	101	63.89	X00186	ENSMUSG00000039967	34803113	34882960	-	upstream	-3806	3557	NearestLocation	Zfp292
chr4	34550493	34550992	500	*	6.67	6.94	6.35	0.6	0.136	1	123	81.32	X00188	ENSMUSG00000028291	34550937	34566908	+	overlapStart	-195	55	NearestLocation	Akirin2
chr4	107889615	107890114	500	*	6.67	6.94	6.35	0.6	0.136	1	123	81.32	X00189	ENSMUSG00000028608	107889813	107899384	+	overlapStart	51	198	NearestLocation	0610037L13Rik
chr11	75679269	75679768	500	*	6.9	7.15	6.6	0.55	0.136	1	142	96.81	X00191	ENSMUSG00000017776	75679259	75706908	+	inside	259	10	NearestLocation	Crk
chr2	164785603	164786102	500	*	6.98	7.22	6.68	0.54	0.136	1	149	102.61	X00192	ENSMUSG00000050373	164785823	164793816	+	overlapStart	29	220	NearestLocation	Snx21
chr8	70331993	70332492	500	*	5.68	5.21	6.04	-0.83	0.136	1	37	65.83	X00190	ENSMUSG00000055694	70329817	70331587	+	downstream	2425	406	NearestLocation	NA
chr8	70331993	70332492	500	*	5.68	5.21	6.04	-0.83	0.136	1	37	65.83	X00190	ENSMUSG00000058301	70331522	70353273	-	inside	21031	471	Overlapping	Upf1
chr4	151044369	151044868	500	*	6.46	6.74	6.1	0.64	0.137	1	107	68.73	X00198	ENSMUSG00000014592	150917322	151861876	-	inside	817258	127047	Overlapping	Camta1
chr4	151044369	151044868	500	*	6.46	6.74	6.1	0.64	0.137	1	107	68.73	X00198	ENSMUSG00000028957	151003652	151044665	-	overlapStart	47	203	NearestLocation	Per3
chr14	57745783	57746282	500	*	6.69	6.95	6.36	0.59	0.137	1	124	82.29	X00199	ENSMUSG00000021959	57642077	57758388	-	inside	12356	12106	NearestLocation	Lats2
chr1	37864849	37865348	500	*	7.24	7.47	6.98	0.49	0.137	1	177	125.85	X00195	ENSMUSG00000060771	37754776	37866429	-	inside	1331	1081	Overlapping	Tsga10
chr1	37864849	37865348	500	*	7.24	7.47	6.98	0.49	0.137	1	177	125.85	X00195	ENSMUSG00000097268	37865299	37871388	+	overlapStart	-201	49	NearestLocation	NA
chr5	5514310	5514809	500	*	7.24	7.47	6.98	0.49	0.137	1	177	125.85	X00196	ENSMUSG00000046798	5505015	5514958	-	inside	398	149	NearestLocation	Cldn12
chr1	30873594	30874093	500	*	7.36	7.58	7.1	0.47	0.137	1	191	137.47	X00194	ENSMUSG00000048874	30802339	30873921	-	overlapStart	77	172	NearestLocation	Phf3
chr10	50900967	50901466	500	*	7.2	6.93	7.43	-0.5	0.137	1	122	172.32	X00201	ENSMUSG00000019913	50895651	50989152	+	inside	5565	5316	NearestLocation	Sim1
chr14	30654136	30654635	500	*	6.28	5.91	6.58	-0.68	0.137	1	60	95.84	X00200	ENSMUSG00000052395	30654360	30691317	+	overlapStart	26	224	NearestLocation	Rft1
chr7	28796608	28797107	500	*	6.08	5.67	6.4	-0.72	0.137	1	51	84.22	X00197	ENSMUSG00000051735	28788969	28798963	+	inside	7889	1856	NearestLocation	Rinl
chr4	114902490	114902989	500	*	6	5.58	6.33	-0.74	0.137	1	48	80.35	X00193	ENSMUSG00000085323	114817161	114902859	-	overlapStart	119	130	NearestLocation	NA
chr18	36744183	36744682	500	*	6.04	6.36	5.63	0.73	0.138	1	82	49.37	X00202	ENSMUSG00000014294	36742332	36744557	-	overlapStart	125	125	NearestLocation	Ndufa2
chr18	36744183	36744682	500	*	6.04	6.36	5.63	0.73	0.138	1	82	49.37	X00202	ENSMUSG00000024474	36744656	36757639	+	overlapStart	-224	26	NearestLocation	Ik
chr4	118179607	118180106	500	*	5.54	5.04	5.91	-0.86	0.138	1	33	60.02	X00203	ENSMUSG00000033326	118136957	118180043	-	overlapStart	187	63	NearestLocation	Kdm4a
chr7	110614382	110614881	500	*	6.7	6.97	6.38	0.59	0.139	1	125	83.25	X00206	ENSMUSG00000038371	110308013	110614922	-	inside	290	41	NearestLocation	Sbf2
chr5	24444737	24445236	500	*	7.07	7.3	6.79	0.52	0.139	1	158	110.36	X00207	ENSMUSG00000028959	24438440	24445287	-	inside	301	51	NearestLocation	Fastk
chr1	175692152	175692651	500	*	7.12	6.85	7.35	-0.51	0.139	1	115	163.6	X00209	ENSMUSG00000026525	175662421	175692776	-	inside	374	125	NearestLocation	Opn3
chr8	24554354	24554853	500	*	5.46	4.95	5.84	-0.88	0.139	1	31	57.12	X00204	ENSMUSG00000031549	24531894	24576333	-	inside	21729	21480	NearestLocation	Ido2
chrX	11998929	11999428	500	*	5.46	4.95	5.84	-0.88	0.139	1	31	57.12	X00205	ENSMUSG00000081947	11984475	11984650	+	downstream	14703	14279	NearestLocation	NA
chr6	34029163	34029662	500	*	5.14	4.58	5.54	-0.95	0.139	1	24	46.47	X00208	ENSMUSG00000056215	34029448	34134034	+	overlapStart	-36	214	NearestLocation	Lrguk
chr17	51832857	51833356	500	*	5.76	6.11	5.31	0.8	0.14	1	69	39.69	X00217	ENSMUSG00000023927	51736187	51833290	-	overlapStart	184	66	NearestLocation	Satb1
chr17	51832857	51833356	500	*	5.76	6.11	5.31	0.8	0.14	1	69	39.69	X00217	ENSMUSG00000103753	51832819	51834723	+	inside	287	38	Overlapping	NA
chr16	92695358	92695857	500	*	6.06	6.38	5.65	0.72	0.14	1	83	50.34	X00215	ENSMUSG00000022952	92601466	92826149	-	inside	130541	93892	Overlapping	Runx1
chr16	92695358	92695857	500	*	6.06	6.38	5.65	0.72	0.14	1	83	50.34	X00215	ENSMUSG00000097139	92612824	92620032	+	downstream	82784	75326	NearestLocation	NA
chr2	124090180	124090679	500	*	6.24	6.54	5.86	0.68	0.14	1	93	58.08	X00216	ENSMUSG00000027200	124089969	124667770	+	inside	461	211	NearestLocation	Sema6d
chr5	90223687	90224186	500	*	7.21	7.43	6.94	0.49	0.14	1	173	122.94	X00213	ENSMUSG00000035505	90214724	90224001	-	overlapStart	65	185	NearestLocation	Cox18
chr11	77981588	77982087	500	*	7.66	7.86	7.43	0.43	0.14	1	232	172.32	X00210	ENSMUSG00000037791	77982754	78030539	+	upstream	-916	667	NearestLocation	Phf12
chr2	180893555	180894054	500	*	6.36	6	6.65	-0.65	0.14	1	64	100.68	X00211	ENSMUSG00000065454	180894031	180894117	+	overlapStart	-227	23	NearestLocation	Mir124a-3
chr1	120120691	120121190	500	*	6.1	5.7	6.41	-0.71	0.14	1	52	85.19	X00214	ENSMUSG00000026385	120113280	120121078	-	overlapStart	138	112	NearestLocation	Dbi
chr1	120120691	120121190	500	*	6.1	5.7	6.41	-0.71	0.14	1	52	85.19	X00214	ENSMUSG00000026388	120121187	120188189	+	overlapStart	-247	3	NearestLocation	3110009E18Rik
chr18	13970223	13970722	500	*	6.03	5.61	6.35	-0.73	0.14	1	49	81.32	X00212	ENSMUSG00000024420	13687013	13972733	-	inside	2261	2011	NearestLocation	Zfp521
chr11	94485950	94486449	500	*	5.67	6.02	5.2	0.82	0.141	1	65	36.79	X00221	ENSMUSG00000020867	94478904	94486179	-	overlapStart	-21	229	NearestLocation	Spata20
chr3	87906233	87906732	500	*	7.16	7.38	6.88	0.5	0.141	1	167	118.1	X00220	ENSMUSG00000004897	87906321	87916132	+	overlapStart	161	88	NearestLocation	Hdgf
chr17	13007733	13008232	500	*	7.43	7.18	7.64	-0.46	0.141	1	145	199.42	X00219	ENSMUSG00000006818	13007839	13018119	+	overlapStart	143	106	NearestLocation	Sod2
chr2	118373458	118373957	500	*	7.13	6.86	7.36	-0.5	0.141	1	116	164.57	X00218	ENSMUSG00000040133	118277110	118373419	-	upstream	-289	39	NearestLocation	Gpr176
chr11	3913041	3913540	500	*	6.49	6.15	6.77	-0.62	0.141	1	71	109.39	X00222	ENSMUSG00000048807	3907021	3914664	-	inside	1374	1124	NearestLocation	Slc35e4
chr14	27096706	27097205	500	*	5.09	5.49	4.54	0.95	0.142	1	45	23.23	X00227	ENSMUSG00000040717	27039001	27107286	+	inside	57955	10081	NearestLocation	Il17rd
chr15	63997870	63998369	500	*	6.73	6.99	6.41	0.58	0.142	1	127	85.19	X00226	ENSMUSG00000022378	63929097	64060448	-	inside	62328	62079	Overlapping	Fam49b
chr15	63997870	63998369	500	*	6.73	6.99	6.41	0.58	0.142	1	127	85.19	X00226	ENSMUSG00000065936	64025948	64026052	+	upstream	-27828	27579	NearestLocation	NA
chr16	23224867	23225787	921	*	6.79	6.48	7.04	-0.56	0.142	1	89	131.66	X00229	ENSMUSG00000045231	23220656	23225368	-	overlapStart	41	419	NearestLocation	NA
chr16	23224867	23225787	921	*	6.79	6.48	7.04	-0.56	0.142	1	89	131.66	X00229	ENSMUSG00000022885	23224740	23360350	+	inside	587	127	Overlapping	St6gal1
chr2	31469870	31470369	500	*	5.8	5.36	6.14	-0.79	0.142	1	41	70.67	X00223	ENSMUSG00000076441	31470207	31520672	+	overlapStart	-87	162	NearestLocation	Ass1
chr2	70474963	70475462	500	*	5.8	5.36	6.14	-0.79	0.142	1	41	70.67	X00224	ENSMUSG00000075304	70474923	70477729	+	inside	289	40	NearestLocation	Sp5
chr9	100446092	100446591	500	*	5.8	5.36	6.14	-0.79	0.142	1	41	70.67	X00225	ENSMUSG00000101287	100450322	100451912	+	upstream	-3980	3731	NearestLocation	NA
chr8	110721519	110722018	500	*	5.64	5.17	6	-0.83	0.142	1	36	63.89	X00228	ENSMUSG00000033763	110721476	110741400	+	inside	292	43	NearestLocation	Mtss1l
chr6	100670604	100671103	500	*	6.32	5.95	6.61	-0.66	0.143	1	62	97.77	X00230	ENSMUSG00000035378	100573081	100671157	-	inside	303	54	NearestLocation	Shq1
chr11	86544510	86545009	500	*	6.28	6.57	5.91	0.66	0.144	1	95	60.02	X00234	ENSMUSG00000020516	86498871	86544805	-	overlapStart	45	204	NearestLocation	Rps6kb1
chr11	86544510	86545009	500	*	6.28	6.57	5.91	0.66	0.144	1	95	60.02	X00234	ENSMUSG00000020513	86544991	86567360	+	overlapStart	-231	18	NearestLocation	Tubd1
chr15	38473389	38473888	500	*	6.52	6.79	6.18	0.61	0.144	1	111	72.6	X00233	ENSMUSG00000099110	38490473	38490547	-	downstream	16909	16585	NearestLocation	Mir6951
chr4	48279455	48279954	500	*	7.8	7.99	7.58	0.41	0.144	1	254	191.68	X00231	ENSMUSG00000028343	48193323	48279558	-	overlapStart	-146	103	NearestLocation	Erp44
chr4	48279455	48279954	500	*	7.8	7.99	7.58	0.41	0.144	1	254	191.68	X00231	ENSMUSG00000028344	48279760	48431954	+	overlapStart	-56	194	NearestLocation	Invs
chr5	102845060	102845559	500	*	5.49	5	5.86	-0.86	0.144	1	32	58.08	X00232	ENSMUSG00000057315	102481391	102897936	+	inside	363919	52377	NearestLocation	Arhgap24
chr2	71389040	71389539	500	*	6	6.32	5.6	0.72	0.145	1	80	48.4	X00237	ENSMUSG00000027018	71388958	71441622	+	inside	332	82	NearestLocation	Hat1
chr2	49787707	49788206	500	*	6.1	6.41	5.71	0.7	0.145	1	85	52.28	X00236	ENSMUSG00000026765	49787688	49948849	+	inside	268	19	NearestLocation	Lypd6b
chr14	64652290	64652789	500	*	6.84	7.09	6.54	0.55	0.145	1	136	92.93	X00238	ENSMUSG00000060012	64652531	64806296	+	overlapStart	9	241	NearestLocation	Kif13b
chr11	21091211	21091710	500	*	7.26	7.48	7	0.48	0.145	1	178	127.78	X00239	ENSMUSG00000020134	21091291	21150323	+	overlapStart	169	80	NearestLocation	Peli1
chr3	96238199	96238698	500	*	3.87	3	4.41	-1.41	0.145	1	8	21.3	X00235	ENSMUSG00000081058	96238108	96239127	-	inside	679	91	NearestLocation	Hist2h3c2
chr1	153679097	153679596	500	*	5.41	5.78	4.91	0.87	0.146	1	55	30.01	X00241	ENSMUSG00000042671	153653025	153700323	+	inside	26321	20727	Overlapping	Rgs8
chr1	153679097	153679596	500	*	5.41	5.78	4.91	0.87	0.146	1	55	30.01	X00241	ENSMUSG00000100945	153690391	153692656	-	downstream	13310	10795	NearestLocation	NA
chr4	133424017	133424516	500	*	5.41	5.78	4.91	0.87	0.146	1	55	30.01	X00242	ENSMUSG00000092745	133369776	133369864	+	downstream	54490	54153	NearestLocation	Mir5122
chr8	41054638	41055137	500	*	5.41	5.78	4.91	0.87	0.146	1	55	30.01	X00243	ENSMUSG00000045636	40990914	41133726	-	inside	78838	63724	Overlapping	Mtus1
chr8	41054638	41055137	500	*	5.41	5.78	4.91	0.87	0.146	1	55	30.01	X00243	ENSMUSG00000085672	41053110	41064706	+	inside	1778	1528	NearestLocation	NA
chr9	63137452	63137951	500	*	5.41	5.78	4.91	0.87	0.146	1	55	30.01	X00244	ENSMUSG00000094201	63133283	63133389	+	downstream	4419	4063	NearestLocation	NA
chr2	180709862	180710361	500	*	8.38	8.54	8.21	0.33	0.146	1	372	295.26	X00240	ENSMUSG00000038914	180657964	180709999	-	overlapStart	-113	137	NearestLocation	Dido1
chr2	180709862	180710361	500	*	8.38	8.54	8.21	0.33	0.146	1	372	295.26	X00240	ENSMUSG00000027573	180710117	180718733	+	overlapStart	-5	244	NearestLocation	Gid8
chr2	18047329	18047828	500	*	6.07	5.67	6.38	-0.71	0.146	1	51	83.25	X00245	ENSMUSG00000054074	18040676	18049051	-	inside	1473	1223	NearestLocation	Skida1
chr11	30754731	30755230	500	*	5.18	4.64	5.57	-0.92	0.146	1	25	47.44	X00246	ENSMUSG00000087474	30750832	30756147	+	inside	4148	917	Overlapping	NA
chr11	30754731	30755230	500	*	5.18	4.64	5.57	-0.92	0.146	1	25	47.44	X00246	ENSMUSG00000083990	30754572	30754961	-	overlapStart	-19	159	NearestLocation	NA
chr8	54509310	54509809	500	*	5.18	4.64	5.57	-0.92	0.146	1	25	47.44	X00247	ENSMUSG00000054408	54520433	54529998	-	downstream	20438	10624	NearestLocation	Spcs3
chr16	59600522	59601021	500	*	5.32	5.7	4.81	0.89	0.147	1	52	28.07	X00249	ENSMUSG00000091562	59558013	59600886	-	overlapStart	114	135	NearestLocation	NA
chr19	46056353	46056852	500	*	7.21	7.43	6.95	0.48	0.147	1	173	123.91	X00251	ENSMUSG00000025223	46032593	46045214	-	upstream	-11388	11139	NearestLocation	Ldb1
chr19	46056353	46056852	500	*	7.21	7.43	6.95	0.48	0.147	1	173	123.91	X00251	ENSMUSG00000055491	46044886	46072915	+	inside	11716	11467	Overlapping	Pprc1
chr9	110117117	110117616	500	*	7.89	8.07	7.68	0.39	0.147	1	269	205.23	X00250	ENSMUSG00000074056	110117703	110119916	+	upstream	-337	87	NearestLocation	NA
chr14	7567912	7568411	500	*	4.55	3.91	5	-1.09	0.147	1	15	31.95	X00248	ENSMUSG00000079364	7545151	7568566	-	inside	404	155	NearestLocation	Gm3558
chr17	26946523	26947022	500	*	6.39	6.67	6.04	0.63	0.148	1	102	65.83	X00255	ENSMUSG00000067629	26941384	26972434	+	inside	5388	5139	Overlapping	Syngap1
chr17	26946523	26947022	500	*	6.39	6.67	6.04	0.63	0.148	1	102	65.83	X00255	ENSMUSG00000093118	26948056	26948119	-	downstream	1347	1034	NearestLocation	Mir3083
chr10	122986118	122986617	500	*	6.55	6.82	6.22	0.6	0.148	1	113	74.54	X00253	ENSMUSG00000065406	122985634	122985723	-	upstream	-645	395	NearestLocation	Mirlet7i
chr5	130029078	130029577	500	*	6.71	6.97	6.4	0.57	0.148	1	125	84.22	X00252	ENSMUSG00000025532	130029290	130060789	+	overlapStart	38	212	NearestLocation	Crcp
chr17	52602344	52602843	500	*	5.76	5.32	6.1	-0.78	0.148	1	40	68.73	X00254	ENSMUSG00000098552	52592981	52602660	-	overlapStart	66	183	NearestLocation	NA
chr17	52602344	52602843	500	*	5.76	5.32	6.1	-0.78	0.148	1	40	68.73	X00254	ENSMUSG00000035580	52602709	52979194	+	overlapStart	-115	134	NearestLocation	Kcnh8
chr6	47044741	47045240	500	*	5.03	5.43	4.48	0.95	0.149	1	43	22.27	X00256	ENSMUSG00000039419	45060061	47301369	+	inside	1984929	256129	Overlapping	Cntnap2
chr6	47044741	47045240	500	*	5.03	5.43	4.48	0.95	0.149	1	43	22.27	X00256	ENSMUSG00000029686	47453398	47526139	+	upstream	-408408	408158	NearestLocation	Cul1
chr11	6475193	6475692	500	*	6.31	6.6	5.95	0.65	0.149	1	97	61.96	X00258	ENSMUSG00000094483	6467599	6475917	-	inside	475	225	Overlapping	Purb
chr11	6475193	6475692	500	*	6.31	6.6	5.95	0.65	0.149	1	97	61.96	X00258	ENSMUSG00000086839	6475425	6493535	+	overlapStart	17	232	NearestLocation	NA
chr3	146404662	146405161	500	*	6.72	6.98	6.41	0.56	0.149	1	126	85.19	X00262	ENSMUSG00000036825	146404642	146440139	+	inside	270	20	NearestLocation	Ssx2ip
chr7	132930862	132931361	500	*	6.79	7.04	6.49	0.55	0.149	1	132	90.03	X00257	ENSMUSG00000030849	130162451	133123350	-	inside	192238	191989	Overlapping	Fgfr2
chr7	132930862	132931361	500	*	6.79	7.04	6.49	0.55	0.149	1	132	90.03	X00257	ENSMUSG00000097595	132889489	132931375	-	inside	263	14	Overlapping	NA
chr7	132930862	132931361	500	*	6.79	7.04	6.49	0.55	0.149	1	132	90.03	X00257	ENSMUSG00000030967	132931142	132986391	+	overlapStart	-30	219	NearestLocation	Zranb1
chr13	46669386	46669885	500	*	7.02	7.26	6.75	0.51	0.149	1	153	107.46	X00261	ENSMUSG00000069237	46669522	46678056	+	overlapStart	114	136	NearestLocation	Fam8a1
chr19	11818377	11818876	500	*	6.16	5.78	6.46	-0.68	0.149	1	55	88.09	X00260	ENSMUSG00000041488	11775119	11819403	-	inside	777	527	NearestLocation	Stx3
chr5	138155408	138155907	500	*	5.85	5.43	6.18	-0.76	0.149	1	43	72.6	X00259	ENSMUSG00000037007	138139702	138155744	-	overlapStart	86	163	NearestLocation	Zfp113
chr12	84417190	84417689	500	*	6.05	6.36	5.65	0.7	0.15	1	82	50.34	X00264	ENSMUSG00000057265	84409071	84433780	+	inside	8369	8119	Overlapping	Bbof1
chr12	84417190	84417689	500	*	6.05	6.36	5.65	0.7	0.15	1	82	50.34	X00264	ENSMUSG00000104049	84417194	84418577	+	overlapStart	246	4	NearestLocation	NA
chr12	84417190	84417689	500	*	6.05	6.36	5.65	0.7	0.15	1	82	50.34	X00264	ENSMUSG00000098134	84417196	84418578	+	overlapStart	244	6	NearestLocation	Rnf113a2
chr7	83883756	83884255	500	*	7.42	7.63	7.18	0.45	0.15	1	198	145.21	X00265	ENSMUSG00000070462	83879873	83884305	-	inside	299	50	NearestLocation	Mesdc1
chrX	140665274	140665773	500	*	5.45	4.95	5.81	-0.86	0.15	1	31	56.15	X00263	ENSMUSG00000000266	140664599	140767715	+	inside	925	675	NearestLocation	Mid2
chr19	61266268	61266767	500	*	4.16	4.64	3.41	1.23	0.151	1	25	10.65	X00268	ENSMUSG00000095993	61296902	61297069	-	downstream	30551	30135	NearestLocation	NA
chr7	19295745	19296244	500	*	5.44	5.81	4.95	0.85	0.151	1	56	30.98	X00266	ENSMUSG00000030401	19282662	19296164	+	overlapEnd	13332	80	Overlapping	Rtn2
chr7	19295745	19296244	500	*	5.44	5.81	4.95	0.85	0.151	1	56	30.98	X00266	ENSMUSG00000097266	19298260	19300770	-	downstream	4776	2016	NearestLocation	NA
chr7	45833266	45833765	500	*	5.75	6.09	5.31	0.78	0.151	1	68	39.69	X00270	ENSMUSG00000053801	45825227	45830944	-	upstream	-2572	2322	NearestLocation	Grwd1
chr7	45833266	45833765	500	*	5.75	6.09	5.31	0.78	0.151	1	68	39.69	X00270	ENSMUSG00000002771	45831883	45870928	-	inside	37412	1383	Overlapping	Grin2d
chr10	21159566	21160065	500	*	6.33	6.61	5.98	0.64	0.151	1	98	62.92	X00269	ENSMUSG00000019982	21124936	21160905	-	inside	1089	840	NearestLocation	Myb
chr1	133130972	133131471	500	*	7.48	7.69	7.25	0.44	0.151	1	206	151.99	X00267	ENSMUSG00000102425	133128676	133131782	-	inside	560	311	Overlapping	NA
chr1	133130972	133131471	500	*	7.48	7.69	7.25	0.44	0.151	1	206	151.99	X00267	ENSMUSG00000046062	133131143	133139783	+	overlapStart	79	171	NearestLocation	Ppp1r15b
chr12	108605521	108606020	500	*	5.66	6	5.2	0.8	0.152	1	64	36.79	X00272	ENSMUSG00000097788	108536400	108555614	-	upstream	-50156	49907	NearestLocation	Gm16596
chr12	108605521	108606020	500	*	5.66	6	5.2	0.8	0.152	1	64	36.79	X00272	ENSMUSG00000021262	108554720	108688513	+	inside	51050	50801	Overlapping	Evl
chr12	87107422	87107921	500	*	5.86	6.19	5.45	0.74	0.152	1	73	43.56	X00275	ENSMUSG00000021032	87097531	87102539	-	upstream	-5133	4883	NearestLocation	Ngb
chr12	87107422	87107921	500	*	5.86	6.19	5.45	0.74	0.152	1	73	43.56	X00275	ENSMUSG00000034126	87106866	87147902	-	inside	40230	556	Overlapping	Pomt2
chr7	101296561	101297060	500	*	6.16	6.46	5.79	0.67	0.152	1	88	55.18	X00271	ENSMUSG00000047767	101289392	101302251	-	inside	5441	5191	NearestLocation	Atg16l2
chr2	168080825	168081324	500	*	6.42	6.7	6.08	0.62	0.152	1	104	67.76	X00273	ENSMUSG00000044641	168081004	168101203	+	overlapStart	70	179	NearestLocation	Pard6b
chr5	120588237	120588736	500	*	6.18	5.81	6.48	-0.67	0.152	1	56	89.06	X00274	ENSMUSG00000032741	120534160	120588613	-	overlapStart	127	123	NearestLocation	Tpcn1
chr16	38742288	38742787	500	*	6.35	6.63	6	0.63	0.153	1	99	63.89	X00280	ENSMUSG00000022793	38742264	38769049	+	inside	274	24	NearestLocation	B4galt4
chr10	42761281	42761780	500	*	8.31	8.47	8.14	0.33	0.153	1	355	281.71	X00282	ENSMUSG00000019802	42761496	42832514	+	overlapStart	34	215	NearestLocation	Sec63
chr10	42761281	42761780	500	*	8.31	8.47	8.14	0.33	0.153	1	355	281.71	X00282	ENSMUSG00000097008	42761596	42763635	-	overlapEnd	2105	184	Overlapping	NA
chr13	73603716	73604215	500	*	6.97	6.69	7.2	-0.51	0.153	1	103	147.15	X00279	ENSMUSG00000021610	73604002	73620639	+	overlapStart	-36	213	NearestLocation	Clptm1l
chr9	26733800	26734299	500	*	6.69	6.38	6.94	-0.57	0.153	1	83	122.94	X00276	ENSMUSG00000045994	26733728	26763101	+	inside	322	72	NearestLocation	B3gat1
chr12	84100775	84101274	500	*	5.96	5.55	6.28	-0.72	0.153	1	47	77.45	X00277	ENSMUSG00000043487	84100654	84111349	+	inside	370	121	NearestLocation	Acot6
chr9	122950610	122951109	500	*	5.96	5.55	6.28	-0.72	0.153	1	47	77.45	X00278	ENSMUSG00000032551	122945089	122951000	-	overlapStart	140	109	NearestLocation	1110059G10Rik
chr9	122950610	122951109	500	*	5.96	5.55	6.28	-0.72	0.153	1	47	77.45	X00278	ENSMUSG00000036768	122951081	123018725	+	overlapStart	-221	28	NearestLocation	Kif15
chr4	146941815	146942314	500	*	2.96	1.58	3.65	-2.07	0.153	1	3	12.58	X00281	ENSMUSG00000096958	146153456	147024959	-	inside	82895	82645	Overlapping	NA
chr4	146941815	146942314	500	*	2.96	1.58	3.65	-2.07	0.153	1	3	12.58	X00281	ENSMUSG00000083027	146942476	146945825	+	upstream	-412	162	NearestLocation	NA
chr8	74993593	74994092	500	*	6.44	6.71	6.1	0.61	0.154	1	105	68.73	X00284	ENSMUSG00000034518	74993356	75031978	+	inside	486	237	NearestLocation	Hmgxb4
chr18	60560496	60560995	500	*	6.76	7.01	6.46	0.55	0.154	1	129	88.09	X00283	ENSMUSG00000024604	60560736	60572810	+	overlapStart	10	240	NearestLocation	Rbm22
chr7	123123983	123124482	500	*	6.92	7.16	6.64	0.52	0.154	1	143	99.71	X00285	ENSMUSG00000052707	123123885	123195288	+	inside	347	98	NearestLocation	Tnrc6a
chr14	55899971	55900470	500	*	6.33	5.98	6.61	-0.63	0.154	1	63	97.77	X00286	ENSMUSG00000022223	55897286	55900232	-	overlapStart	12	238	NearestLocation	Sdr39u1
chrX	20688431	20688930	500	*	5.47	5.83	5	0.84	0.155	1	57	31.95	X00293	ENSMUSG00000031065	20687954	20699880	+	inside	726	477	NearestLocation	Cdk16
chr14	25607952	25608451	500	*	6.37	6.64	6.02	0.62	0.155	1	100	64.86	X00291	ENSMUSG00000007817	25459185	25666743	+	inside	149017	58292	Overlapping	Zmiz1
chr14	25607952	25608451	500	*	6.37	6.64	6.02	0.62	0.155	1	100	64.86	X00291	ENSMUSG00000097136	25548390	25554369	-	upstream	-53833	53583	NearestLocation	NA
chr1	51478152	51478651	500	*	6.76	6.46	7.01	-0.55	0.155	1	88	128.75	X00289	ENSMUSG00000026107	51465862	51478425	-	overlapStart	23	226	NearestLocation	Nabp1
chr7	28867472	28867971	500	*	6.76	6.46	7.01	-0.55	0.155	1	88	128.75	X00290	ENSMUSG00000053522	28863853	28866284	+	downstream	3869	1188	NearestLocation	Lgals7
chr10	75763967	75764466	500	*	6.7	6.39	6.95	-0.56	0.155	1	84	123.91	X00287	ENSMUSG00000020196	75646110	75764357	-	overlapStart	141	109	NearestLocation	Cabin1
chr3	88685650	88686149	500	*	6.7	6.39	6.95	-0.56	0.155	1	84	123.91	X00288	ENSMUSG00000028060	88685794	88712933	+	overlapStart	106	144	NearestLocation	2810403A07Rik
chr6	113392457	113392956	500	*	6.46	6.13	6.73	-0.61	0.155	1	70	106.49	X00295	ENSMUSG00000030276	113389260	113414583	+	inside	3446	3197	NearestLocation	Ttll3
chr18	46280421	46280920	500	*	6.2	5.83	6.49	-0.66	0.155	1	57	90.03	X00292	ENSMUSG00000024477	46239949	46280850	-	overlapStart	180	70	NearestLocation	Pggt1b
chr17	8508287	8508786	500	*	5.48	5	5.84	-0.84	0.155	1	32	57.12	X00294	ENSMUSG00000023868	8525372	8986648	+	upstream	-16836	16586	NearestLocation	Pde10a
chr2	71539003	71539502	500	*	5.58	5.93	5.12	0.81	0.156	1	61	34.85	X00299	ENSMUSG00000084946	71516454	71537891	-	upstream	-1361	1112	NearestLocation	NA
chr6	87887633	87888132	500	*	6.46	6.73	6.12	0.6	0.156	1	106	69.7	X00298	ENSMUSG00000030058	87887814	87913595	+	overlapStart	68	181	NearestLocation	Copg1
chr9	24502873	24503853	981	*	6.62	6.88	6.31	0.57	0.156	1	118	79.38	X00301	ENSMUSG00000043067	24411776	24503140	-	overlapStart	-223	267	NearestLocation	Dpy19l1
chr2	74658265	74658764	500	*	6.13	5.75	6.43	-0.67	0.156	1	54	86.16	X00296	ENSMUSG00000001815	74652991	74659557	-	inside	1043	793	NearestLocation	Evx2
chr17	3083755	3084254	500	*	5.98	5.58	6.29	-0.71	0.156	1	48	78.41	X00300	ENSMUSG00000023795	3076578	3084183	-	overlapStart	179	71	NearestLocation	NA
chr10	22058234	22058733	500	*	5.4	4.91	5.76	-0.85	0.156	1	30	54.21	X00297	ENSMUSG00000104090	22056284	22058630	-	overlapStart	146	103	NearestLocation	NA
chr16	4488970	4489469	500	*	4.96	5.36	4.41	0.94	0.157	1	41	21.3	X00304	ENSMUSG00000022519	4480216	4541816	-	inside	52596	8754	Overlapping	Srl
chr16	4488970	4489469	500	*	4.96	5.36	4.41	0.94	0.157	1	41	21.3	X00304	ENSMUSG00000083585	4539308	4539695	+	upstream	-50088	49839	NearestLocation	NA
chr8	105297397	105297896	500	*	6.11	6.41	5.73	0.67	0.157	1	85	53.24	X00308	ENSMUSG00000014859	105297663	105305369	+	overlapStart	-17	233	NearestLocation	E2f4
chr19	6498363	6498862	500	*	6.2	6.49	5.84	0.66	0.157	1	90	57.12	X00302	ENSMUSG00000033768	6418731	6544169	+	inside	79881	45307	Overlapping	Nrxn2
chr19	6498363	6498862	500	*	6.2	6.49	5.84	0.66	0.157	1	90	57.12	X00302	ENSMUSG00000052188	6530711	6532011	-	downstream	33399	31849	NearestLocation	NA
chr2	78868924	78869423	500	*	6.2	6.49	5.84	0.66	0.157	1	90	57.12	X00303	ENSMUSG00000027011	78868124	78921293	+	inside	1050	800	NearestLocation	Ube2e3
chr10	43479429	43479928	500	*	6.95	7.18	6.67	0.51	0.157	1	145	101.65	X00305	ENSMUSG00000038214	43479140	43515396	+	inside	538	289	NearestLocation	Bend3
chr17	25809207	25809706	500	*	7.41	7.17	7.61	-0.44	0.157	1	144	195.55	X00307	ENSMUSG00000097518	25794894	25964784	+	inside	14562	14313	Overlapping	NA
chr17	25809207	25809706	500	*	7.41	7.17	7.61	-0.44	0.157	1	144	195.55	X00307	ENSMUSG00000025738	25809085	25821244	+	inside	371	122	NearestLocation	Fbxl16
chr7	29281450	29281949	500	*	6.35	6	6.63	-0.63	0.157	1	64	98.74	X00306	ENSMUSG00000074227	29256331	29281977	-	inside	277	28	NearestLocation	Spint2
chr19	46135631	46136130	500	*	6.02	6.32	5.63	0.7	0.158	1	80	49.37	X00309	ENSMUSG00000038754	46131897	46135307	+	downstream	3983	324	NearestLocation	Elovl3
chr19	46135631	46136130	500	*	6.02	6.32	5.63	0.7	0.158	1	80	49.37	X00309	ENSMUSG00000025229	46135685	46148326	-	overlapEnd	12446	54	Overlapping	Pitx3
chr6	116264088	116264587	500	*	6.02	6.32	5.63	0.7	0.158	1	80	49.37	X00310	ENSMUSG00000042213	116264222	116330298	+	overlapStart	116	134	NearestLocation	Zfand4
chr1	59237036	59237535	500	*	6.56	6.82	6.24	0.58	0.158	1	113	75.51	X00315	ENSMUSG00000026024	59162926	59237231	-	overlapStart	-55	195	NearestLocation	Als2
chr13	56135291	56135790	500	*	6.56	6.82	6.24	0.58	0.158	1	113	75.51	X00316	ENSMUSG00000015937	56073619	56136361	-	inside	821	571	NearestLocation	H2afy
chr14	115040873	115041824	952	*	6.56	6.82	6.24	0.58	0.158	1	113	75.51	X00317	ENSMUSG00000089726	115042879	115046727	+	upstream	-1531	1055	NearestLocation	NA
chr19	53529123	53529622	500	*	6.56	6.82	6.24	0.58	0.158	1	113	75.51	X00318	ENSMUSG00000034765	53529109	53542431	+	inside	263	14	NearestLocation	Dusp5
chr2	129100746	129101245	500	*	6.56	6.82	6.24	0.58	0.158	1	113	75.51	X00319	ENSMUSG00000027395	129100995	129126594	+	overlapStart	1	249	NearestLocation	Polr1b
chr19	53903579	53904078	500	*	7.03	7.26	6.76	0.5	0.158	1	153	108.42	X00311	ENSMUSG00000024975	53892231	53929861	+	inside	11597	11348	NearestLocation	Pdcd4
chr7	44496217	44496716	500	*	7.03	7.26	6.76	0.5	0.158	1	153	108.42	X00312	ENSMUSG00000008140	44489937	44496529	-	overlapStart	63	187	NearestLocation	Emc10
chr7	44496217	44496716	500	*	7.03	7.26	6.76	0.5	0.158	1	153	108.42	X00312	ENSMUSG00000051113	44496588	44501134	+	overlapStart	-122	128	NearestLocation	Fam71e1
chr14	57825959	57826458	500	*	8.4	8.23	8.55	-0.32	0.158	1	301	375.61	X00313	ENSMUSG00000021965	57806561	57826163	-	overlapStart	-45	204	NearestLocation	Ska3
chr14	57825959	57826458	500	*	8.4	8.23	8.55	-0.32	0.158	1	301	375.61	X00313	ENSMUSG00000021967	57826239	57828745	+	overlapStart	-31	219	NearestLocation	Mrpl57
chr13	51847364	51847863	500	*	7	6.73	7.23	-0.5	0.158	1	106	150.05	X00314	ENSMUSG00000021453	51846678	51848468	+	inside	936	605	NearestLocation	Gadd45g
chr14	6038250	6038749	500	*	2.32	3.17	-0.05	3.22	0.159	1	9	0.97	X00321	ENSMUSG00000091568	6016759	6038209	-	upstream	-291	41	NearestLocation	NA
chr14	6038250	6038749	500	*	2.32	3.17	-0.05	3.22	0.159	1	9	0.97	X00321	ENSMUSG00000094634	6020654	6108665	-	inside	70165	17596	Overlapping	NA
chr8	119394724	119395223	500	*	6.73	6.98	6.43	0.55	0.159	1	126	86.16	X00322	ENSMUSG00000074064	119394878	119411102	+	overlapStart	96	154	NearestLocation	Mlycd
chr16	11066042	11066541	500	*	6.89	7.13	6.61	0.52	0.159	1	140	97.77	X00326	ENSMUSG00000022500	10959275	11066157	-	overlapStart	-135	115	NearestLocation	Litaf
chr16	11066042	11066541	500	*	6.89	7.13	6.61	0.52	0.159	1	140	97.77	X00326	ENSMUSG00000037972	11066298	11074983	+	overlapStart	-6	243	NearestLocation	Snn
chr16	4419881	4420380	500	*	7.38	7.58	7.14	0.44	0.159	1	192	141.34	X00327	ENSMUSG00000005580	4287529	4420498	-	inside	368	118	NearestLocation	Adcy9
chr2	157078468	157078967	500	*	7.38	7.58	7.14	0.44	0.159	1	192	141.34	X00328	ENSMUSG00000055485	157015799	157079254	-	inside	536	287	NearestLocation	Soga1
chr7	60004286	60004785	500	*	6.15	5.78	6.45	-0.66	0.159	1	55	87.13	X00320	ENSMUSG00000000948	59974149	60005064	-	inside	528	279	Overlapping	NA
chr7	60004286	60004785	500	*	6.15	5.78	6.45	-0.66	0.159	1	55	87.13	X00320	ENSMUSG00000102252	59982495	60140219	-	inside	135683	21791	Overlapping	Snrpn
chr7	60004286	60004785	500	*	6.15	5.78	6.45	-0.66	0.159	1	55	87.13	X00320	ENSMUSG00000102627	59995449	60005049	-	inside	513	264	NearestLocation	Snurf
chr11	96279579	96280078	500	*	5.58	5.13	5.93	-0.8	0.159	1	35	60.99	X00323	ENSMUSG00000056648	96281905	96285315	+	upstream	-2077	1827	NearestLocation	Hoxb8
chr11	107012491	107012990	500	*	5.16	4.64	5.54	-0.89	0.159	1	25	46.47	X00324	ENSMUSG00000083356	107003909	107004740	-	upstream	-8000	7751	NearestLocation	NA
chr8	125955522	125956021	500	*	5.16	4.64	5.54	-0.89	0.159	1	25	46.47	X00325	ENSMUSG00000033998	125995102	126030683	+	upstream	-39330	39081	NearestLocation	Kcnk1
chr14	67188620	67189119	500	*	5.31	5.67	4.81	0.86	0.16	1	51	28.07	X00333	ENSMUSG00000093744	67232437	67233129	-	downstream	44259	43318	NearestLocation	NA
chrX	94122735	94123234	500	*	5.83	6.15	5.41	0.74	0.16	1	71	42.59	X00335	ENSMUSG00000079509	94074631	94123702	-	inside	718	468	NearestLocation	Zfx
chr7	27653936	27654435	500	*	6.04	6.34	5.65	0.69	0.16	1	81	50.34	X00334	ENSMUSG00000007944	27653915	27656208	+	inside	271	21	NearestLocation	Ttc9b
chr8	70865326	70865825	500	*	6.57	6.83	6.26	0.58	0.16	1	114	76.48	X00332	ENSMUSG00000020887	70863127	70865428	+	overlapEnd	2449	102	NearestLocation	NA
chr19	47731189	47731688	500	*	6.65	6.91	6.35	0.56	0.16	1	120	81.32	X00331	ENSMUSG00000025066	47731756	47735588	+	upstream	-318	68	NearestLocation	Sfr1
chr2	93822325	93822824	500	*	6.98	7.21	6.71	0.5	0.16	1	148	104.55	X00336	ENSMUSG00000027198	93661028	93822568	-	overlapStart	-6	243	NearestLocation	Ext2
chr8	57652049	57652548	500	*	7.12	7.34	6.86	0.48	0.16	1	162	116.17	X00329	ENSMUSG00000031608	57523828	57653032	-	inside	734	484	NearestLocation	Galnt7
chr2	143062909	143063408	500	*	5.84	5.43	6.16	-0.74	0.16	1	43	71.64	X00330	ENSMUSG00000008333	143063039	143072853	+	overlapStart	119	130	NearestLocation	Snrpb2
chr14	29721947	29722446	500	*	6.91	7.14	6.63	0.51	0.161	1	141	98.74	X00338	ENSMUSG00000021991	28904943	29721864	-	upstream	-332	83	NearestLocation	Cacna2d3
chr18	80986128	80987076	949	*	7.2	7.42	6.95	0.46	0.161	1	171	123.91	X00341	ENSMUSG00000024565	80966376	80986578	-	overlapStart	-24	450	NearestLocation	Sall3
chr18	80986128	80987076	949	*	7.2	7.42	6.95	0.46	0.161	1	171	123.91	X00341	ENSMUSG00000098880	80978913	80987869	-	inside	1267	793	Overlapping	NA
chr6	48593610	48594109	500	*	7.33	7.54	7.09	0.45	0.161	1	186	136.5	X00339	ENSMUSG00000052751	48593883	48599082	+	overlapStart	-23	226	NearestLocation	Repin1
chr14	61439720	61440219	500	*	7.52	7.71	7.29	0.42	0.161	1	210	156.83	X00342	ENSMUSG00000021929	61365186	61439947	-	overlapStart	-23	227	NearestLocation	Kpna3
chr15	76343297	76343796	500	*	8.02	8.18	7.82	0.36	0.161	1	291	226.53	X00337	ENSMUSG00000022551	76343523	76345934	+	overlapStart	23	226	NearestLocation	Cyc1
chr7	4812398	4812897	500	*	6.24	5.88	6.52	-0.64	0.161	1	59	91.97	X00340	ENSMUSG00000060860	4808155	4812351	-	upstream	-297	47	NearestLocation	Ube2s
chr11	69098832	69099331	500	*	6.5	6.77	6.18	0.59	0.162	1	109	72.6	X00344	ENSMUSG00000020893	69095217	69109960	+	inside	3865	3615	NearestLocation	Per1
chr7	132813373	132813872	500	*	6.92	7.15	6.64	0.51	0.162	1	142	99.71	X00345	ENSMUSG00000030849	130162451	133123350	-	inside	309728	309478	Overlapping	Fgfr2
chr7	132813373	132813872	500	*	6.92	7.15	6.64	0.51	0.162	1	142	99.71	X00345	ENSMUSG00000030956	132712082	132813886	-	inside	264	14	NearestLocation	Fam53b
chr11	44618173	44618672	500	*	7.47	7.67	7.24	0.43	0.162	1	203	151.02	X00347	ENSMUSG00000057098	44617317	45008091	+	inside	1105	856	NearestLocation	Ebf1
chr11	44618173	44618672	500	*	7.47	7.67	7.24	0.43	0.162	1	203	151.02	X00347	ENSMUSG00000103671	44617317	44617773	+	downstream	1105	400	NearestLocation	NA
chr7	43466084	43466583	500	*	6.1	5.73	6.4	-0.67	0.162	1	53	84.22	X00346	ENSMUSG00000070604	43463151	43471913	+	inside	3183	2933	NearestLocation	Vsig10l
chr4	144892170	144892669	500	*	5.43	4.95	5.79	-0.83	0.162	1	31	55.18	X00343	ENSMUSG00000066026	144892827	144928209	+	upstream	-407	158	NearestLocation	Dhrs3
chr4	155235242	155235741	500	*	5.43	5.78	4.95	0.83	0.163	1	55	30.98	X00352	ENSMUSG00000029050	155154075	155222592	-	upstream	-12900	12650	NearestLocation	Ski
chr7	16221819	16222318	500	*	5.43	5.78	4.95	0.83	0.163	1	55	30.98	X00353	ENSMUSG00000006019	16197147	16222037	-	overlapStart	-31	218	NearestLocation	Dhx34
chr19	37697915	37698414	500	*	5.74	6.07	5.31	0.76	0.163	1	67	39.69	X00348	ENSMUSG00000024987	37697808	37701528	+	inside	356	107	NearestLocation	Cyp26a1
chr3	84582599	84583098	500	*	6.77	7.01	6.48	0.53	0.163	1	129	89.06	X00355	ENSMUSG00000074513	84496093	84582625	-	overlapStart	-223	26	NearestLocation	Arfip1
chr3	84582599	84583098	500	*	6.77	7.01	6.48	0.53	0.163	1	129	89.06	X00355	ENSMUSG00000102805	84496426	85887516	-	inside	1304668	86173	Overlapping	Arfip1
chrX	136115657	136116156	500	*	6.92	6.64	7.15	-0.51	0.163	1	100	142.31	X00349	ENSMUSG00000087553	136104603	136115420	+	downstream	11303	237	NearestLocation	5730412P04Rik
chr8	27042556	27043055	500	*	6.75	6.46	7	-0.54	0.163	1	88	127.78	X00354	ENSMUSG00000091154	27042377	27043042	-	overlapStart	236	13	NearestLocation	NA
chr8	27042556	27043055	500	*	6.75	6.46	7	-0.54	0.163	1	88	127.78	X00354	ENSMUSG00000031485	27042555	27056131	+	inside	251	1	Overlapping	Prosc
chr6	50455691	50456190	500	*	6.03	5.64	6.33	-0.68	0.163	1	50	80.35	X00350	ENSMUSG00000029822	50293330	50456201	-	inside	261	11	NearestLocation	Osbpl3
chr11	49901485	49901984	500	*	5.78	5.36	6.1	-0.75	0.163	1	41	68.73	X00351	ENSMUSG00000020374	49901835	49980994	+	overlapStart	-101	149	NearestLocation	Rasgef1c
chr1	155234073	155234572	500	*	5.54	5.88	5.08	0.8	0.164	1	59	33.88	X00362	ENSMUSG00000033722	155212471	155244444	-	inside	10122	9872	Overlapping	BC034090
chr1	155234073	155234572	500	*	5.54	5.88	5.08	0.8	0.164	1	59	33.88	X00362	ENSMUSG00000103670	155231304	155233159	+	downstream	3018	914	NearestLocation	NA
chrX	8892946	8893445	500	*	6.6	6.86	6.29	0.56	0.164	1	116	78.41	X00356	ENSMUSG00000052364	8892382	8894964	+	inside	814	564	NearestLocation	B630019K06Rik
chr9	35421416	35421915	500	*	6.85	7.09	6.57	0.52	0.164	1	136	94.87	X00357	ENSMUSG00000038119	35421128	35507652	+	inside	538	288	NearestLocation	Cdon
chr7	101310581	101311080	500	*	7.16	7.38	6.91	0.47	0.164	1	166	120.04	X00358	ENSMUSG00000030688	101317086	101346626	+	upstream	-6256	6006	NearestLocation	Stard10
chr11	116029964	116030463	500	*	7.54	7.73	7.32	0.42	0.164	1	213	159.73	X00361	ENSMUSG00000020770	116030322	116061214	+	overlapStart	-108	141	NearestLocation	Unk
chr11	22617462	22617961	500	*	5.61	5.17	5.95	-0.78	0.164	1	36	61.96	X00359	ENSMUSG00000086256	22617408	22618487	+	inside	304	54	NearestLocation	NA
chr8	27128278	27128777	500	*	5.61	5.17	5.95	-0.78	0.164	1	36	61.96	X00360	ENSMUSG00000031487	27123832	27128632	-	overlapStart	104	145	NearestLocation	Brf2
chr8	95633277	95633776	500	*	6.08	6.38	5.71	0.67	0.165	1	83	52.28	X00369	ENSMUSG00000031669	95633559	95645059	+	overlapStart	-33	217	NearestLocation	Gins3
chr8	106935656	106936155	500	*	6.45	6.71	6.12	0.59	0.165	1	105	69.7	X00370	ENSMUSG00000041308	106935750	107014192	+	overlapStart	156	94	NearestLocation	Sntb2
chr12	4233940	4234439	500	*	6.78	7.02	6.49	0.53	0.165	1	130	90.03	X00365	ENSMUSG00000020652	4196004	4234294	-	overlapStart	104	145	NearestLocation	Cenpo
chr12	4233940	4234439	500	*	6.78	7.02	6.49	0.53	0.165	1	130	90.03	X00365	ENSMUSG00000096199	4234027	4240123	+	overlapStart	163	87	NearestLocation	Ptrhd1
chr11	77763059	77763558	500	*	6.86	7.1	6.58	0.52	0.165	1	137	95.84	X00364	ENSMUSG00000000631	77763246	77865980	+	overlapStart	62	187	NearestLocation	Myo18a
chr7	30955883	30956382	500	*	8.01	8.17	7.82	0.36	0.165	1	289	225.56	X00371	ENSMUSG00000058239	30945252	30956803	-	inside	671	421	Overlapping	Usf2
chr7	30955883	30956382	500	*	8.01	8.17	7.82	0.36	0.165	1	289	225.56	X00371	ENSMUSG00000090357	30955825	30958004	+	inside	307	58	NearestLocation	NA
chr3	88336007	88336506	500	*	9.08	9.2	8.96	0.24	0.165	1	588	497.58	X00363	ENSMUSG00000001420	88328655	88336148	-	overlapStart	-108	141	NearestLocation	Tmem79
chr3	88336007	88336506	500	*	9.08	9.2	8.96	0.24	0.165	1	588	497.58	X00363	ENSMUSG00000001415	88336260	88362338	+	overlapStart	-4	246	NearestLocation	Smg5
chr18	63692161	63692660	500	*	7.19	6.94	7.4	-0.46	0.165	1	123	169.41	X00368	ENSMUSG00000024583	63662801	63692359	-	overlapStart	-51	198	NearestLocation	Txnl1
chr10	22815863	22816849	987	*	6.19	5.83	6.48	-0.64	0.165	1	57	89.06	X00366	ENSMUSG00000045680	22817279	22820128	-	downstream	3772	430	NearestLocation	Tcf21
chr3	10087929	10088428	500	*	3.36	2.32	3.95	-1.63	0.165	1	5	15.49	X00367	ENSMUSG00000049230	10088110	10092565	+	overlapStart	68	181	NearestLocation	Gm9833
chr6	146271023	146271522	500	*	5.34	5.7	4.86	0.84	0.166	1	52	29.04	X00372	ENSMUSG00000030287	146108299	146502223	-	inside	230951	162724	Overlapping	Itpr2
chr6	146271023	146271522	500	*	5.34	5.7	4.86	0.84	0.166	1	52	29.04	X00372	ENSMUSG00000082120	146463326	146463607	-	downstream	192335	191804	NearestLocation	NA
chr7	25687144	25687643	500	*	5.34	5.7	4.86	0.84	0.166	1	52	29.04	X00373	ENSMUSG00000002603	25687002	25705077	+	inside	392	142	NearestLocation	Tgfb1
chr11	79660692	79661191	500	*	5.76	6.09	5.35	0.74	0.166	1	68	40.66	X00374	ENSMUSG00000017639	79591212	79698023	+	inside	69730	36832	Overlapping	Rab11fip4
chr11	79660692	79661191	500	*	5.76	6.09	5.35	0.74	0.166	1	68	40.66	X00374	ENSMUSG00000086569	79670372	79675128	-	downstream	14186	9181	NearestLocation	Rab11fip4os2
chr15	73839484	73839983	500	*	5.88	6.19	5.48	0.71	0.166	1	73	44.53	X00377	ENSMUSG00000072487	73761410	73839699	-	overlapStart	-35	215	NearestLocation	Mroh5
chr15	73839484	73839983	500	*	5.88	6.19	5.48	0.71	0.166	1	73	44.53	X00377	ENSMUSG00000086361	73834561	73839908	+	overlapEnd	5173	75	Overlapping	LOC102634429
chr1	182019332	182019831	500	*	5.98	6.29	5.6	0.69	0.166	1	78	48.4	X00375	ENSMUSG00000022995	181896384	182019990	-	inside	408	159	NearestLocation	Enah
chrX	56731813	56732312	500	*	5.71	5.29	6.04	-0.76	0.166	1	39	65.83	X00376	ENSMUSG00000023092	56731787	56793346	+	inside	275	26	NearestLocation	Fhl1
chr3	87617058	87617995	938	*	6.46	6.73	6.14	0.58	0.167	1	106	70.67	X00385	ENSMUSG00000093230	87617399	87617501	+	includeFeature	127	341	NearestLocation	NA
chr3	87617058	87617995	938	*	6.46	6.73	6.14	0.58	0.167	1	106	70.67	X00385	ENSMUSG00000041977	87617559	87738034	+	overlapStart	-33	436	NearestLocation	Arhgef11
chr14	121378624	121379123	500	*	6.55	6.81	6.24	0.57	0.167	1	112	75.51	X00386	ENSMUSG00000063410	121286343	121379334	-	inside	460	211	NearestLocation	Stk24
chr18	38993013	38993512	500	*	7.04	7.26	6.77	0.48	0.167	1	153	109.39	X00378	ENSMUSG00000036452	38601534	39376284	+	inside	391728	382772	Overlapping	Arhgap26
chr18	38993013	38993512	500	*	7.04	7.26	6.77	0.48	0.167	1	153	109.39	X00378	ENSMUSG00000086991	38993635	38994192	-	downstream	930	123	NearestLocation	NA
chrX	13280476	13280975	500	*	7.95	7.75	8.12	-0.36	0.167	1	216	277.83	X00381	ENSMUSG00000000787	13280970	13294052	+	overlapStart	-244	5	NearestLocation	Ddx3x
chr16	91546915	91547414	500	*	5.97	5.58	6.28	-0.69	0.167	1	48	77.45	X00379	ENSMUSG00000022965	91547072	91565169	+	overlapStart	92	157	NearestLocation	Ifngr2
chr2	181313887	181314386	500	*	5.97	5.58	6.28	-0.69	0.167	1	48	77.45	X00380	ENSMUSG00000027581	181306459	181314500	-	inside	364	114	NearestLocation	Stmn3
chr12	56535508	56536007	500	*	5.89	5.49	6.2	-0.71	0.167	1	45	73.57	X00382	ENSMUSG00000001496	56531958	56536908	-	inside	1150	901	Overlapping	Nkx2-1
chr12	56535508	56536007	500	*	5.89	5.49	6.2	-0.71	0.167	1	45	73.57	X00382	ENSMUSG00000098172	56535343	56607476	+	inside	415	165	NearestLocation	NA
chr17	85486449	85486948	500	*	5.2	4.7	5.57	-0.87	0.167	1	26	47.44	X00383	ENSMUSG00000097803	85498633	85499008	+	upstream	-11935	11685	NearestLocation	NA
chr2	74689882	74690381	500	*	5.2	4.7	5.57	-0.87	0.167	1	26	47.44	X00384	ENSMUSG00000099521	74683446	74694194	+	inside	6686	3813	Overlapping	NA
chr2	74689882	74690381	500	*	5.2	4.7	5.57	-0.87	0.167	1	26	47.44	X00384	ENSMUSG00000050368	74691924	74695105	+	upstream	-1792	1543	NearestLocation	Hoxd10
chr6	21985716	21986215	500	*	5.25	5.61	4.76	0.85	0.168	1	49	27.11	X00390	ENSMUSG00000097364	21985908	22067687	-	overlapEnd	81721	192	Overlapping	NA
chr6	21985716	21986215	500	*	5.25	5.61	4.76	0.85	0.168	1	49	27.11	X00390	ENSMUSG00000062980	21985916	22256404	+	overlapStart	50	200	NearestLocation	Cped1
chr11	121228832	121229331	500	*	5.46	5.81	5	0.81	0.168	1	56	31.95	X00391	ENSMUSG00000039294	121222588	121229322	-	overlapStart	240	9	NearestLocation	BC017643
chr4	141538593	141539092	500	*	5.57	5.91	5.12	0.78	0.168	1	60	34.85	X00397	ENSMUSG00000040761	141467890	141538597	-	overlapStart	-245	4	NearestLocation	Spen
chr8	44937102	44937601	500	*	5.57	5.91	5.12	0.78	0.168	1	60	34.85	X00398	ENSMUSG00000070047	44935447	45052257	+	inside	1905	1655	NearestLocation	Fat1
chr8	121088792	121089291	500	*	5.67	6	5.24	0.76	0.168	1	64	37.75	X00388	ENSMUSG00000092329	119910841	124345722	+	inside	1178201	1177951	Overlapping	Galnt2
chr8	121088792	121089291	500	*	5.67	6	5.24	0.76	0.168	1	64	37.75	X00388	ENSMUSG00000098560	121084609	121084706	-	upstream	-4336	4086	NearestLocation	NA
chr14	118705761	118706260	500	*	6.81	7.04	6.52	0.52	0.168	1	132	91.97	X00389	ENSMUSG00000032849	118482692	118706219	-	overlapStart	209	41	NearestLocation	Abcc4
chr5	104459862	104460361	500	*	7.11	6.86	7.33	-0.47	0.168	1	116	160.7	X00392	ENSMUSG00000034462	104459450	104505819	+	inside	662	412	NearestLocation	Pkd2
chr8	121108110	121108609	500	*	7.11	6.86	7.33	-0.47	0.168	1	116	160.7	X00393	ENSMUSG00000092329	119910841	124345722	+	inside	1197519	1197269	Overlapping	Galnt2
chr8	121108110	121108609	500	*	7.11	6.86	7.33	-0.47	0.168	1	116	160.7	X00393	ENSMUSG00000031816	121095012	121108392	-	overlapStart	32	217	NearestLocation	Mthfsd
chr11	74619701	74620200	500	*	5.46	5	5.81	-0.81	0.168	1	32	56.15	X00387	ENSMUSG00000069814	74619605	74641516	+	inside	345	96	NearestLocation	Ccdc92b
chr2	30343531	30344030	500	*	5.38	4.91	5.73	-0.83	0.168	1	30	53.24	X00395	ENSMUSG00000052533	30286397	30344266	+	inside	57383	236	Overlapping	Nup188
chr2	30343531	30344030	500	*	5.38	4.91	5.73	-0.83	0.168	1	30	53.24	X00395	ENSMUSG00000078010	30353443	30353527	-	downstream	9747	9413	NearestLocation	NA
chr2	84742756	84743255	500	*	5.38	4.91	5.73	-0.83	0.168	1	30	53.24	X00396	ENSMUSG00000097187	84742169	84743655	-	inside	649	400	NearestLocation	NA
chr10	80387654	80388153	500	*	5.29	4.81	5.65	-0.85	0.168	1	28	50.34	X00394	ENSMUSG00000048696	80380355	80387659	-	overlapStart	-245	5	NearestLocation	Mex3d
chr17	35725505	35726004	500	*	6	6.3	5.63	0.68	0.169	1	79	49.37	X00399	ENSMUSG00000092219	35737734	35739806	-	downstream	14052	11730	NearestLocation	NA
chr1	42952922	42953421	500	*	6.39	6.66	6.06	0.6	0.169	1	101	66.8	X00401	ENSMUSG00000041907	42952872	43035456	+	inside	300	50	NearestLocation	Gpr45
chr4	109666777	109667276	500	*	6.39	6.66	6.06	0.6	0.169	1	101	66.8	X00402	ENSMUSG00000028551	109660876	109667189	-	overlapStart	163	87	NearestLocation	Cdkn2c
chr5	139484224	139484723	500	*	6.39	6.66	6.06	0.6	0.169	1	101	66.8	X00403	ENSMUSG00000053581	139471211	139484549	-	overlapStart	75	174	NearestLocation	Zfand2a
chr12	113014597	113015096	500	*	6.48	6.74	6.16	0.58	0.169	1	107	71.64	X00405	ENSMUSG00000021143	113014508	113074401	+	inside	338	89	NearestLocation	Pacs2
chr19	6061345	6061844	500	*	7.13	7.35	6.88	0.46	0.169	1	163	118.1	X00406	ENSMUSG00000075227	6061192	6062472	+	inside	402	153	NearestLocation	Znhit2
chr9	123260094	123260593	500	*	7.34	7.54	7.1	0.44	0.169	1	186	137.47	X00404	ENSMUSG00000054871	123259058	123260789	-	inside	445	196	NearestLocation	Tmem158
chr7	13009419	13009918	500	*	6.9	6.63	7.13	-0.5	0.169	1	99	140.37	X00400	ENSMUSG00000049600	13004936	13009822	-	overlapStart	154	96	NearestLocation	Zbtb45
chr7	37772646	37773145	500	*	5.05	5.43	4.54	0.89	0.17	1	43	23.23	X00409	ENSMUSG00000043456	37472135	37773641	-	inside	745	496	NearestLocation	Zfp536
chr12	65073757	65074256	500	*	6.66	6.91	6.36	0.54	0.17	1	120	82.29	X00408	ENSMUSG00000020949	65062436	65073944	-	overlapStart	-62	187	NearestLocation	Fkbp3
chr12	4592782	4594116	1335	*	6.99	7.21	6.72	0.49	0.17	1	148	105.52	X00407	ENSMUSG00000091619	4592826	4592927	-	includeFeature	-522	44	NearestLocation	NA
chr12	4592782	4594116	1335	*	6.99	7.21	6.72	0.49	0.17	1	148	105.52	X00407	ENSMUSG00000020640	4593008	4713950	+	overlapStart	441	226	NearestLocation	Itsn2
chr4	155847166	155847665	500	*	5.38	5.73	4.91	0.82	0.171	1	53	30.01	X00414	ENSMUSG00000029071	155847402	155859303	+	overlapStart	14	236	NearestLocation	Dvl1
chr6	100833250	100833749	500	*	5.7	6.02	5.28	0.75	0.171	1	65	38.72	X00415	ENSMUSG00000052144	100833638	100868717	+	overlapStart	-138	111	NearestLocation	Ppp4r2
chr4	129048827	129049326	500	*	6.41	6.67	6.08	0.59	0.171	1	102	67.76	X00413	ENSMUSG00000085085	129050097	129057983	-	downstream	8907	771	NearestLocation	1700086P04Rik
chr7	12478154	12478653	500	*	7	7.22	6.73	0.48	0.171	1	149	106.49	X00411	ENSMUSG00000030386	12478293	12496235	+	overlapStart	111	139	NearestLocation	Zfp606
chr4	132211905	132212404	500	*	7.08	7.29	6.82	0.47	0.171	1	157	113.26	X00416	ENSMUSG00000040025	132184912	132212303	-	overlapStart	149	101	NearestLocation	Ythdf2
chr9	19621755	19622254	500	*	8.51	8.65	8.35	0.3	0.171	1	402	327.21	X00410	ENSMUSG00000057551	19641224	19648048	+	upstream	-19220	18970	NearestLocation	Zfp317
chr3	57651358	57651857	500	*	5.83	5.43	6.14	-0.72	0.171	1	43	70.67	X00412	ENSMUSG00000036513	57642904	57651715	-	overlapStart	107	142	NearestLocation	Commd2
chr18	36783131	36783630	500	*	5.81	6.13	5.41	0.72	0.172	1	70	42.59	X00422	ENSMUSG00000001380	36766530	36783205	-	overlapStart	-175	74	NearestLocation	Hars
chr18	36783131	36783630	500	*	5.81	6.13	5.41	0.72	0.172	1	70	42.59	X00422	ENSMUSG00000019143	36783008	36792562	+	inside	372	123	Overlapping	Hars2
chr1	132758626	132759125	500	*	5.92	6.23	5.54	0.69	0.172	1	75	46.47	X00419	ENSMUSG00000026442	132564690	132741797	-	upstream	-17079	16829	NearestLocation	Nfasc
chr17	35000766	35001265	500	*	6.84	7.08	6.57	0.51	0.172	1	135	94.87	X00418	ENSMUSG00000007029	35000987	35016322	+	overlapStart	29	221	NearestLocation	Vars
chr7	24112190	24112689	500	*	6.92	7.15	6.65	0.5	0.172	1	142	100.68	X00417	ENSMUSG00000052675	24112314	24127952	+	overlapStart	126	124	NearestLocation	Zfp112
chr12	8673823	8674732	910	*	7.36	7.56	7.13	0.43	0.172	1	189	140.37	X00423	ENSMUSG00000020594	8674134	8752581	+	overlapStart	144	311	NearestLocation	Pum2
chr18	58659367	58659866	500	*	6.16	5.81	6.45	-0.64	0.172	1	56	87.13	X00420	ENSMUSG00000024601	58659482	58679570	+	overlapStart	134	115	NearestLocation	Isoc1
chr14	4182786	4183285	500	*	4.43	3.81	4.86	-1.05	0.172	1	14	29.04	X00421	ENSMUSG00000079391	4182576	4204895	+	inside	460	210	NearestLocation	NA
chr2	173229485	173229984	500	*	5.49	5.83	5.04	0.79	0.173	1	57	32.91	X00427	ENSMUSG00000027514	173206612	173218923	-	upstream	-10811	10562	NearestLocation	Zbp1
chr2	173229485	173229984	500	*	5.49	5.83	5.04	0.79	0.173	1	57	32.91	X00427	ENSMUSG00000038400	173224458	173276533	-	inside	46799	5027	Overlapping	Pmepa1
chr2	167492629	167493128	500	*	6.42	6.69	6.1	0.58	0.173	1	103	68.73	X00429	ENSMUSG00000047030	167481133	167492887	-	overlapStart	9	241	NearestLocation	Spata2
chr2	167492629	167493128	500	*	6.42	6.69	6.1	0.58	0.173	1	103	68.73	X00429	ENSMUSG00000006418	167492645	167516173	+	overlapStart	233	16	NearestLocation	Rnf114
chr7	139834075	139834574	500	*	6.42	6.69	6.1	0.58	0.173	1	103	68.73	X00430	ENSMUSG00000025475	139834174	139878088	+	overlapStart	150	99	NearestLocation	Adgra1
chr1	91494582	91495081	500	*	6.6	6.85	6.29	0.55	0.173	1	115	78.41	X00426	ENSMUSG00000034292	91494647	91529307	+	overlapStart	185	65	NearestLocation	Traf3ip1
chr10	80398705	80399204	500	*	7.02	7.24	6.76	0.48	0.173	1	151	108.42	X00431	ENSMUSG00000035478	80392539	80399550	-	inside	596	346	NearestLocation	Mbd3
chr10	67548887	67549386	500	*	7.85	8.02	7.65	0.37	0.173	1	260	201.36	X00425	ENSMUSG00000057134	67544512	67548955	-	overlapStart	-181	68	NearestLocation	Ado
chr10	81105683	81106182	500	*	8.93	9.05	8.8	0.25	0.173	1	529	444.34	X00424	ENSMUSG00000035027	81105915	81124697	+	overlapStart	17	232	NearestLocation	Map2k2
chr14	54912137	54912636	500	*	7.04	6.78	7.26	-0.48	0.173	1	110	152.95	X00428	ENSMUSG00000022199	54906727	54913132	-	inside	746	496	NearestLocation	Slc22a17
chr17	86962944	86963443	500	*	6.05	6.34	5.68	0.66	0.174	1	81	51.31	X00435	ENSMUSG00000024143	86963082	87000069	+	overlapStart	112	138	NearestLocation	Rhoq
chr9	94537295	94537794	500	*	7.1	7.31	6.85	0.46	0.174	1	159	115.2	X00434	ENSMUSG00000045414	94517864	94538081	-	inside	537	287	NearestLocation	1190002N15Rik
chr11	94160548	94161047	500	*	5.67	5.25	6	-0.75	0.174	1	38	63.89	X00432	ENSMUSG00000086003	94133485	94155776	+	downstream	27313	4772	NearestLocation	NA
chr3	129878604	129879103	500	*	5.67	5.25	6	-0.75	0.174	1	38	63.89	X00433	ENSMUSG00000027999	129878622	129895821	+	overlapStart	232	18	NearestLocation	Pla2g12a
chr11	6475913	6476412	500	*	5.72	6.04	5.31	0.73	0.175	1	66	39.69	X00440	ENSMUSG00000094483	6467599	6475917	-	overlapStart	-245	4	NearestLocation	Purb
chr11	6475913	6476412	500	*	5.72	6.04	5.31	0.73	0.175	1	66	39.69	X00440	ENSMUSG00000086839	6475425	6493535	+	inside	737	488	Overlapping	NA
chr2	74703840	74704339	500	*	5.95	6.25	5.57	0.68	0.175	1	76	47.44	X00439	ENSMUSG00000052371	74703248	74716130	-	inside	12040	592	Overlapping	NA
chr2	74703840	74704339	500	*	5.95	6.25	5.57	0.68	0.175	1	76	47.44	X00439	ENSMUSG00000027102	74704615	74707933	+	upstream	-525	276	NearestLocation	Hoxd8
chr4	117155721	117156220	500	*	6.79	7.02	6.51	0.51	0.175	1	130	91	X00445	ENSMUSG00000047675	117153827	117156243	-	inside	273	23	Overlapping	Rps8
chr4	117155721	117156220	500	*	6.79	7.02	6.51	0.51	0.175	1	130	91	X00445	ENSMUSG00000092680	117155770	117155848	-	includeFeature	-122	49	NearestLocation	Snord55
chr11	115187200	115187699	500	*	6.96	7.18	6.69	0.49	0.175	1	145	103.58	X00447	ENSMUSG00000015542	115182832	115187859	-	inside	409	160	Overlapping	Nat9
chr11	115187200	115187699	500	*	6.96	7.18	6.69	0.49	0.175	1	145	103.58	X00447	ENSMUSG00000045980	115187487	115247023	+	overlapStart	-37	212	NearestLocation	Tmem104
chr19	5106728	5107227	500	*	7.18	7.39	6.94	0.45	0.175	1	168	122.94	X00446	ENSMUSG00000024870	5099207	5106996	-	overlapStart	18	231	NearestLocation	Rab1b
chr10	70598935	70599434	500	*	7.34	7.11	7.54	-0.43	0.175	1	138	185.87	X00442	ENSMUSG00000037747	70557682	70655965	-	inside	56781	41253	NearestLocation	D630013N20Rik;Phyhipl
chr10	5550167	5550666	500	*	7.05	6.79	7.27	-0.47	0.175	1	111	153.92	X00436	ENSMUSG00000096054	5020203	5550692	-	inside	276	26	NearestLocation	Syne1
chr16	18234396	18234895	500	*	5.85	5.46	6.16	-0.7	0.175	1	44	71.64	X00441	ENSMUSG00000060166	18220754	18235136	-	inside	490	241	NearestLocation	Zdhhc8
chr2	74679505	74680004	500	*	5.33	4.86	5.68	-0.82	0.175	1	29	51.31	X00443	ENSMUSG00000042499	74679557	74687016	+	overlapStart	197	52	NearestLocation	Hoxd11
chr6	41604462	41604961	500	*	5.33	4.86	5.68	-0.82	0.175	1	29	51.31	X00444	ENSMUSG00000029869	41605482	41620509	+	upstream	-770	521	NearestLocation	Ephb6
chr1	127500184	127500683	500	*	5.24	4.75	5.6	-0.84	0.175	1	27	48.4	X00437	ENSMUSG00000103390	127406776	127407318	+	downstream	93658	92866	NearestLocation	NA
chr1	127500184	127500683	500	*	5.24	4.75	5.6	-0.84	0.175	1	27	48.4	X00437	ENSMUSG00000026347	127486546	127679548	-	inside	179114	13638	Overlapping	Tmem163
chr13	94872461	94872960	500	*	5.24	4.75	5.6	-0.84	0.175	1	27	48.4	X00438	ENSMUSG00000021685	94875602	94885130	+	upstream	-2892	2642	NearestLocation	Otp
chr1	177257463	177257962	500	*	6.07	6.36	5.71	0.65	0.176	1	82	52.28	X00449	ENSMUSG00000019699	177020073	177258203	-	inside	491	241	NearestLocation	Akt3
chr15	37233931	37234430	500	*	6.07	6.36	5.71	0.65	0.176	1	82	52.28	X00450	ENSMUSG00000089804	37231921	37233309	-	upstream	-871	622	NearestLocation	LOC105245924
chr15	37233931	37234430	500	*	6.07	6.36	5.71	0.65	0.176	1	82	52.28	X00450	ENSMUSG00000022286	37233036	37363569	+	inside	1144	895	Overlapping	Grhl2
chr7	126928669	126929168	500	*	6.62	6.87	6.33	0.54	0.176	1	117	80.35	X00448	ENSMUSG00000030685	126928879	126945631	+	overlapStart	39	210	NearestLocation	Kctd13
chr17	47410249	47410748	500	*	4.54	4.95	3.95	1	0.177	1	31	15.49	X00460	ENSMUSG00000096361	47410363	47410740	+	includeFeature	135	8	NearestLocation	NA
chr14	87417067	87417566	500	*	5.09	5.46	4.6	0.86	0.177	1	44	24.2	X00461	ENSMUSG00000022019	87416639	87545373	+	inside	677	428	NearestLocation	Tdrd3
chr4	44705269	44705768	500	*	5.09	5.46	4.6	0.86	0.177	1	44	24.2	X00462	ENSMUSG00000014030	44531145	44710487	-	inside	4969	4719	Overlapping	Pax5
chr4	44705269	44705768	500	*	5.09	5.46	4.6	0.86	0.177	1	44	24.2	X00462	ENSMUSG00000103995	44702800	44705110	+	downstream	2718	159	NearestLocation	5730488B01Rik
chr14	28507350	28507849	500	*	5.41	5.75	4.95	0.8	0.177	1	54	30.98	X00453	ENSMUSG00000021994	28504750	28527447	+	inside	2850	2600	NearestLocation	Wnt5a
chr18	64954070	64954569	500	*	5.52	5.86	5.08	0.78	0.177	1	58	33.88	X00459	ENSMUSG00000024589	64887756	65217826	+	inside	66564	66314	NearestLocation	Nedd4l
chr11	103810148	103810647	500	*	5.63	5.95	5.2	0.75	0.177	1	62	36.79	X00454	ENSMUSG00000000125	103774150	103817957	+	inside	36248	7310	NearestLocation	Wnt3
chr16	18127693	18128192	500	*	5.63	5.95	5.2	0.75	0.177	1	62	36.79	X00455	ENSMUSG00000043811	18127642	18152408	+	inside	300	51	NearestLocation	Rtn4r
chr5	66620082	66620581	500	*	6.36	6.63	6.04	0.59	0.177	1	99	65.83	X00458	ENSMUSG00000029207	66298861	66618828	-	upstream	-1504	1254	NearestLocation	Apbb2
chr1	36511772	36512271	500	*	6.54	6.79	6.24	0.56	0.177	1	111	75.51	X00456	ENSMUSG00000001138	36511867	36528237	+	overlapStart	155	95	NearestLocation	Cnnm3
chr17	24163473	24163972	500	*	6.54	6.79	6.24	0.56	0.177	1	111	75.51	X00457	ENSMUSG00000036820	24155833	24163766	-	overlapStart	44	206	NearestLocation	Amdhd2
chr17	24163473	24163972	500	*	6.54	6.79	6.24	0.56	0.177	1	111	75.51	X00457	ENSMUSG00000024121	24163866	24169702	-	overlapEnd	5980	106	Overlapping	Atp6v0c
chr3	105451479	105451978	500	*	5.6	5.17	5.93	-0.76	0.177	1	36	60.99	X00451	ENSMUSG00000074346	105441595	105452955	-	inside	1227	977	Overlapping	Kcnd3os
chr3	105451479	105451978	500	*	5.6	5.17	5.93	-0.76	0.177	1	36	60.99	X00451	ENSMUSG00000040896	105452330	105674002	+	upstream	-602	352	NearestLocation	Kcnd3
chr4	63410160	63410659	500	*	5.6	5.17	5.93	-0.76	0.177	1	36	60.99	X00452	ENSMUSG00000039158	63367125	63403354	-	upstream	-7056	6806	NearestLocation	Akna
chr8	71396628	71397127	500	*	6.64	6.88	6.35	0.54	0.178	1	118	81.32	X00464	ENSMUSG00000031820	71396855	71404772	+	overlapStart	23	227	NearestLocation	Babam1
chr12	24831068	24831567	500	*	6.81	7.04	6.54	0.51	0.178	1	132	92.93	X00466	ENSMUSG00000020646	24831599	24960301	+	upstream	-281	32	NearestLocation	Mboat2
chr2	144010172	144010671	500	*	6.98	7.2	6.72	0.48	0.178	1	147	105.52	X00465	ENSMUSG00000027422	143947395	144011263	-	inside	841	592	NearestLocation	Rrbp1
chr1	54250416	54250915	500	*	7.06	7.28	6.81	0.46	0.178	1	155	112.3	X00469	ENSMUSG00000025983	54250683	54368727	+	overlapStart	-17	232	NearestLocation	Ccdc150
chr19	12795482	12795981	500	*	7.9	7.71	8.07	-0.36	0.178	1	210	269.12	X00463	ENSMUSG00000024695	12763660	12796126	-	inside	394	145	NearestLocation	Zfp91;Zfp91Cntf
chr11	117266115	117266614	500	*	5.96	5.58	6.26	-0.67	0.178	1	48	76.48	X00467	ENSMUSG00000059248	117199661	117362325	+	inside	66703	66454	Overlapping	2009-09-01
chr11	117266115	117266614	500	*	5.96	5.58	6.26	-0.67	0.178	1	48	76.48	X00467	ENSMUSG00000086050	117257649	117263437	-	upstream	-2927	2678	NearestLocation	NA
chr9	4376278	4376777	500	*	5.7	5.29	6.02	-0.73	0.178	1	39	64.86	X00468	ENSMUSG00000094086	4371269	4371335	-	upstream	-5193	4943	NearestLocation	NA
chr5	115011525	115012024	500	*	6.28	6.55	5.95	0.6	0.179	1	94	61.96	X00472	ENSMUSG00000029550	115011137	115098790	+	inside	637	388	NearestLocation	Sppl3
chr2	32693867	32694366	500	*	6.47	6.73	6.16	0.57	0.179	1	106	71.64	X00474	ENSMUSG00000009566	32682609	32704145	-	inside	10029	9779	Overlapping	Fpgs
chr2	32693867	32694366	500	*	6.47	6.73	6.16	0.57	0.179	1	106	71.64	X00474	ENSMUSG00000098972	32687630	32687766	-	upstream	-6350	6101	NearestLocation	Mir8093
chr5	110770389	110770888	500	*	8.02	8.18	7.84	0.34	0.179	1	290	228.46	X00470	ENSMUSG00000029505	110664373	110770717	-	overlapStart	79	171	NearestLocation	Ep400
chr6	4903508	4904007	500	*	6.48	6.17	6.73	-0.56	0.179	1	72	106.49	X00473	ENSMUSG00000032827	4902917	5165661	+	inside	841	591	NearestLocation	Ppp1r9a
chr11	57518079	57518578	500	*	6.35	6.02	6.61	-0.59	0.179	1	65	97.77	X00475	ENSMUSG00000020523	57482993	57518617	-	inside	289	39	NearestLocation	Fam114a2
chr11	103016744	103017243	500	*	6.2	5.86	6.48	-0.62	0.179	1	58	89.06	X00471	ENSMUSG00000097410	102863337	103075903	+	inside	153657	58660	Overlapping	NA
chr11	103016744	103017243	500	*	6.2	5.86	6.48	-0.62	0.179	1	58	89.06	X00471	ENSMUSG00000020935	102994047	103028333	-	inside	11339	11090	Overlapping	Dcakd
chr11	103016744	103017243	500	*	6.2	5.86	6.48	-0.62	0.179	1	58	89.06	X00471	ENSMUSG00000020936	103028190	103068912	+	upstream	-11196	10947	NearestLocation	Nmt1
chr1	153746665	153747164	500	*	4.98	5.36	4.48	0.88	0.18	1	41	22.27	X00478	ENSMUSG00000099568	153743552	153749324	-	inside	2410	2160	NearestLocation	NA
chr12	53252532	53253031	500	*	4.98	5.36	4.48	0.88	0.18	1	41	22.27	X00479	ENSMUSG00000021010	53248677	54072175	+	inside	4105	3855	NearestLocation	Npas3
chr18	88894070	88894569	500	*	4.98	5.36	4.48	0.88	0.18	1	41	22.27	X00480	ENSMUSG00000056153	88665224	88927481	-	inside	33161	32912	NearestLocation	Socs6
chr5	122779405	122779904	500	*	4.98	5.36	4.48	0.88	0.18	1	41	22.27	X00481	ENSMUSG00000029471	122731173	122779410	-	overlapStart	-244	5	NearestLocation	Camkk2
chr11	20987336	20987835	500	*	5.32	5.67	4.86	0.81	0.18	1	51	29.04	X00477	ENSMUSG00000096061	20937576	20937701	-	upstream	-49885	49635	NearestLocation	NA
chr2	167688597	167689096	500	*	6.74	6.98	6.46	0.52	0.18	1	126	88.09	X00476	ENSMUSG00000090213	167642608	167689822	-	inside	976	726	Overlapping	Tmem189
chr2	167688597	167689096	500	*	6.74	6.98	6.46	0.52	0.18	1	126	88.09	X00476	ENSMUSG00000056501	167688915	167690418	+	overlapStart	-69	181	NearestLocation	Cebpb
chr2	18608365	18608864	500	*	6.62	6.32	6.86	-0.54	0.18	1	80	116.17	X00482	ENSMUSG00000082943	18641786	18642102	-	downstream	33488	32922	NearestLocation	NA
chr8	106168733	106169723	991	*	6.76	6.99	6.48	0.51	0.181	1	127	89.06	X00487	ENSMUSG00000031904	106168875	106198704	+	overlapStart	353	142	NearestLocation	Slc7a6
chr14	101653895	101654394	500	*	6.68	6.39	6.92	-0.53	0.181	1	84	121.01	X00483	ENSMUSG00000022111	101653967	101696124	+	overlapStart	177	72	NearestLocation	Uchl3
chr7	45706418	45706917	500	*	6.68	6.39	6.92	-0.53	0.181	1	84	121.01	X00484	ENSMUSG00000059824	45705088	45710155	+	inside	1580	1330	NearestLocation	Dbp
chr2	36202948	36203447	500	*	5.45	5	5.79	-0.79	0.181	1	32	55.18	X00485	ENSMUSG00000085141	36202314	36212903	+	inside	884	634	NearestLocation	NA
chr9	90054357	90054856	500	*	5.45	5	5.79	-0.79	0.181	1	32	55.18	X00486	ENSMUSG00000032359	90054152	90076089	+	inside	454	205	NearestLocation	Ctsh
chr1	135283606	135284105	500	*	7.01	7.23	6.76	0.47	0.182	1	150	108.42	X00489	ENSMUSG00000041926	135262712	135284084	-	overlapStart	228	21	NearestLocation	Rnpep
chr1	55237054	55237553	500	*	7.09	7.3	6.85	0.46	0.182	1	158	115.2	X00490	ENSMUSG00000046994	55237177	55248470	+	overlapStart	127	123	NearestLocation	Mars2
chr17	17234800	17235299	500	*	5.63	5.21	5.95	-0.74	0.182	1	37	61.96	X00488	ENSMUSG00000072761	17294443	17319511	+	upstream	-59393	59144	NearestLocation	NA
chrX	135008745	135009244	500	*	5.36	4.91	5.71	-0.8	0.182	1	30	52.28	X00491	ENSMUSG00000052676	134971372	135009209	-	overlapStart	215	35	NearestLocation	Zmat1
chr5	36945027	36945526	500	*	5.23	5.58	4.76	0.82	0.183	1	48	27.11	X00493	ENSMUSG00000029120	36868513	36955078	+	inside	76763	9552	Overlapping	Ppp2r2c
chr5	36945027	36945526	500	*	5.23	5.58	4.76	0.82	0.183	1	48	27.11	X00493	ENSMUSG00000039474	36966104	36988982	-	downstream	43706	20578	NearestLocation	Wfs1
chr7	6435209	6435708	500	*	5.23	5.58	4.76	0.82	0.183	1	48	27.11	X00494	ENSMUSG00000045929	6410277	6441691	+	inside	25181	5983	Overlapping	NA
chr7	6435209	6435708	500	*	5.23	5.58	4.76	0.82	0.183	1	48	27.11	X00494	ENSMUSG00000090824	6439836	6440896	+	upstream	-4378	4128	NearestLocation	Olfr1344
chrX	158923035	158923534	500	*	5.23	5.58	4.76	0.82	0.183	1	48	27.11	X00495	ENSMUSG00000082026	158833435	158834319	+	downstream	89849	88716	NearestLocation	NA
chr11	115403621	115404120	500	*	6.42	6.67	6.1	0.57	0.183	1	102	68.73	X00500	ENSMUSG00000018858	115403752	115412674	+	overlapStart	118	131	NearestLocation	Ict1
chr18	12128546	12129045	500	*	6.42	6.67	6.1	0.57	0.183	1	102	68.73	X00501	ENSMUSG00000024404	12128850	12157367	+	overlapStart	-54	195	NearestLocation	Riok3
chr13	54574829	54575328	500	*	7.32	7.52	7.09	0.42	0.183	1	183	136.5	X00498	ENSMUSG00000025870	54575015	54581128	+	overlapStart	63	186	NearestLocation	Arl10
chr17	28328292	28328791	500	*	9.32	9.42	9.21	0.21	0.183	1	685	593.42	X00502	ENSMUSG00000037805	28328471	28331032	+	overlapStart	71	179	NearestLocation	Rpl10a
chr7	96212848	96213347	500	*	6.15	5.81	6.43	-0.62	0.183	1	56	86.16	X00497	ENSMUSG00000048078	96171244	96911093	+	inside	41854	41604	Overlapping	Tenm4
chr7	96212848	96213347	500	*	6.15	5.81	6.43	-0.62	0.183	1	56	86.16	X00497	ENSMUSG00000076143	96249424	96249532	+	upstream	-36326	36077	NearestLocation	Mir708
chr12	16653639	16654138	500	*	5.9	5.52	6.2	-0.68	0.183	1	46	73.57	X00492	ENSMUSG00000020591	16653470	16660236	+	inside	418	169	NearestLocation	Ntsr2
chr3	144198457	144198956	500	*	5.82	5.43	6.12	-0.7	0.183	1	43	69.7	X00499	ENSMUSG00000028266	144188530	144205220	-	inside	6514	6264	NearestLocation	Lmo4
chrX	99216728	99217227	500	*	5.73	5.32	6.04	-0.72	0.183	1	40	65.83	X00496	ENSMUSG00000031217	99136130	99148991	+	downstream	80848	67737	NearestLocation	Efnb1
chr16	13667788	13668287	500	*	6.13	6.41	5.79	0.62	0.184	1	85	55.18	X00505	ENSMUSG00000022685	13537964	13668170	-	overlapStart	132	117	NearestLocation	Parn
chr10	63429662	63430161	500	*	6.6	6.85	6.31	0.53	0.184	1	115	79.38	X00507	ENSMUSG00000060843	63430098	65003667	+	overlapStart	-186	63	NearestLocation	Ctnna3
chr4	156235783	156236282	500	*	6.78	7.01	6.51	0.5	0.184	1	129	91	X00509	ENSMUSG00000095567	156236010	156247616	+	overlapStart	22	227	NearestLocation	Noc2l
chr5	115327181	115328102	922	*	6.78	7.01	6.51	0.5	0.184	1	129	91	X00510	ENSMUSG00000029538	115327177	115333080	+	inside	465	4	NearestLocation	Srsf9
chr7	34313184	34313683	500	*	6.86	7.09	6.6	0.49	0.184	1	136	96.81	X00503	ENSMUSG00000066571	34236707	34313551	-	overlapStart	117	132	NearestLocation	4931406P16Rik
chr1	89930684	89931183	500	*	6.95	7.17	6.69	0.48	0.184	1	144	103.58	X00506	ENSMUSG00000034486	89927956	89931179	-	overlapStart	245	4	NearestLocation	Gbx2
chr1	89930684	89931183	500	*	6.95	7.17	6.69	0.48	0.184	1	144	103.58	X00506	ENSMUSG00000092627	89930234	89933290	+	inside	700	450	Overlapping	NA
chr8	109778398	109778897	500	*	7.04	7.25	6.79	0.46	0.184	1	152	110.36	X00508	ENSMUSG00000031731	109778554	109864204	+	overlapStart	94	156	NearestLocation	Ap1g1
chr6	34780192	34780691	500	*	8.31	8.45	8.14	0.31	0.184	1	350	282.67	X00504	ENSMUSG00000038836	34780432	34859459	+	overlapStart	10	240	NearestLocation	Agbl3
chr8	47345353	47345852	500	*	5.13	5.49	4.65	0.84	0.185	1	45	25.17	X00512	ENSMUSG00000038143	47180048	47352348	-	inside	6746	6496	NearestLocation	Stox2
chr8	47345353	47345852	500	*	5.13	5.49	4.65	0.84	0.185	1	45	25.17	X00512	ENSMUSG00000097922	47294272	47446362	-	inside	100760	51081	Overlapping	NA
chr11	114786237	114786736	500	*	5.8	6.11	5.41	0.7	0.185	1	69	42.59	X00516	ENSMUSG00000010021	114765388	114790739	+	inside	21098	4003	Overlapping	Kif19a
chr11	114786237	114786736	500	*	5.8	6.11	5.41	0.7	0.185	1	69	42.59	X00516	ENSMUSG00000000202	114791217	114795945	-	downstream	9459	4481	NearestLocation	Btbd17
chr10	117224195	117224694	500	*	6.52	6.77	6.22	0.55	0.185	1	109	74.54	X00517	ENSMUSG00000020171	117215142	117224507	-	overlapStart	63	187	NearestLocation	Yeats4
chr15	38078235	38078734	500	*	6.69	6.93	6.41	0.52	0.185	1	122	85.19	X00513	ENSMUSG00000037487	37967328	38078853	-	inside	369	119	NearestLocation	Ubr5
chr15	95790712	95791211	500	*	6.69	6.93	6.41	0.52	0.185	1	122	85.19	X00514	ENSMUSG00000097643	95787856	95791642	-	inside	680	431	Overlapping	NA
chr15	95790712	95791211	500	*	6.69	6.93	6.41	0.52	0.185	1	122	85.19	X00514	ENSMUSG00000064210	95790843	95975464	+	overlapStart	119	131	NearestLocation	Ano6
chr4	155784247	155784746	500	*	6.69	6.93	6.41	0.52	0.185	1	122	85.19	X00515	ENSMUSG00000073680	155781591	155785874	-	inside	1378	1128	NearestLocation	Tmem88b
chr1	134415234	134415733	500	*	6.88	7.1	6.61	0.49	0.185	1	137	97.77	X00518	ENSMUSG00000026457	134415378	134433351	+	overlapStart	106	144	NearestLocation	Adipor1
chr19	3282689	3283188	500	*	6.64	6.36	6.88	-0.53	0.185	1	82	118.1	X00520	ENSMUSG00000024831	3260924	3283017	-	overlapStart	79	171	NearestLocation	Ighmbp2
chr19	3282689	3283188	500	*	6.64	6.36	6.88	-0.53	0.185	1	82	118.1	X00520	ENSMUSG00000024829	3282901	3292837	+	overlapStart	37	212	NearestLocation	Mrpl21
chr11	8624236	8624735	500	*	6.38	6.07	6.64	-0.57	0.185	1	67	99.71	X00519	ENSMUSG00000020422	8431652	8664535	-	inside	40049	39800	NearestLocation	Tns3
chr2	73386486	73386985	500	*	6	5.64	6.29	-0.65	0.185	1	50	78.41	X00521	ENSMUSG00000041762	73341506	73386572	-	overlapStart	-164	86	NearestLocation	Gpr155
chr2	73386486	73386985	500	*	6	5.64	6.29	-0.65	0.185	1	50	78.41	X00521	ENSMUSG00000087176	73386970	73420498	+	overlapStart	-234	15	NearestLocation	NA
chr7	87584265	87584764	500	*	6	5.64	6.29	-0.65	0.185	1	50	78.41	X00522	ENSMUSG00000049583	87602544	88134907	+	upstream	-18030	17780	NearestLocation	Grm5
chr5	144357769	144358268	500	*	5.56	5.13	5.88	-0.75	0.185	1	35	59.05	X00511	ENSMUSG00000047843	144244437	144446757	+	inside	113581	88489	Overlapping	Bri3
chr5	144357769	144358268	500	*	5.56	5.13	5.88	-0.75	0.185	1	35	59.05	X00511	ENSMUSG00000038859	144264526	144358112	-	overlapStart	94	156	NearestLocation	Baiap2l1
chrX	135210459	135210958	500	*	4.74	5.13	4.2	0.93	0.186	1	35	18.39	X00530	ENSMUSG00000031409	135208687	135210687	-	overlapStart	-21	228	NearestLocation	Tceal6
chr13	23309428	23309927	500	*	5.36	5.7	4.91	0.79	0.186	1	52	30.01	X00525	ENSMUSG00000085488	23276204	23313400	-	inside	3722	3473	NearestLocation	4930557F10Rik
chr2	33431263	33431762	500	*	5.36	5.7	4.91	0.79	0.186	1	52	30.01	X00526	ENSMUSG00000068966	33406108	33431324	-	overlapStart	-188	61	NearestLocation	Zbtb34
chr2	167348412	167348911	500	*	6.04	6.32	5.68	0.64	0.186	1	80	51.31	X00527	ENSMUSG00000017929	167298444	167349183	-	inside	521	272	NearestLocation	B4galt5
chr17	35916182	35916681	500	*	6.62	6.86	6.33	0.53	0.186	1	116	80.35	X00528	ENSMUSG00000024436	35910379	35916389	-	overlapStart	-43	207	NearestLocation	Mrps18b
chr17	35916182	35916681	500	*	6.62	6.86	6.33	0.53	0.186	1	116	80.35	X00528	ENSMUSG00000039220	35916434	35932283	+	overlapStart	-2	247	NearestLocation	Ppp1r10
chr5	124530848	124531347	500	*	6.62	6.86	6.33	0.53	0.186	1	116	80.35	X00529	ENSMUSG00000029392	124493082	124531391	-	inside	293	44	NearestLocation	Rilpl1
chr7	120917898	120918397	500	*	7.05	7.26	6.8	0.46	0.186	1	153	111.33	X00524	ENSMUSG00000030880	120917744	120947432	+	inside	404	154	NearestLocation	Polr3e
chr5	33018815	33019314	500	*	7.12	7.33	6.88	0.45	0.186	1	161	118.1	X00523	ENSMUSG00000018965	33018816	33027966	+	overlapStart	248	1	NearestLocation	Ywhah
chr14	64589757	64590256	500	*	6.46	6.15	6.71	-0.56	0.186	1	71	104.55	X00531	ENSMUSG00000097545	64587331	64593961	+	inside	2675	2426	Overlapping	Mir124a-1hg
chr14	64589757	64590256	500	*	6.46	6.15	6.71	-0.56	0.186	1	71	104.55	X00531	ENSMUSG00000065597	64590657	64590741	+	upstream	-651	401	NearestLocation	Mir124a-1
chr18	42395136	42395635	500	*	6.46	6.15	6.71	-0.56	0.186	1	71	104.55	X00532	ENSMUSG00000024497	42394539	42397249	+	inside	847	597	NearestLocation	Pou4f3
chr18	23039869	23040368	500	*	6.17	5.83	6.45	-0.61	0.186	1	57	87.13	X00533	ENSMUSG00000041923	22693181	23041653	-	inside	1535	1285	NearestLocation	Nol4
chr11	62551895	62552394	500	*	3.45	4	2.54	1.46	0.187	1	16	5.81	X00539	ENSMUSG00000019505	62551171	62553213	+	inside	973	724	NearestLocation	Ubb
chr5	117242668	117243167	500	*	5.03	5.39	4.54	0.85	0.187	1	42	23.23	X00538	ENSMUSG00000061288	117120129	117275219	+	inside	122789	32052	Overlapping	Taok3
chr5	117242668	117243167	500	*	5.03	5.39	4.54	0.85	0.187	1	42	23.23	X00538	ENSMUSG00000032959	117282651	117287625	-	downstream	44707	39484	NearestLocation	Pebp1
chr11	120932640	120933139	500	*	6.26	6.52	5.93	0.59	0.187	1	92	60.99	X00543	ENSMUSG00000048445	120826529	120932872	-	overlapStart	-18	232	NearestLocation	Ccdc57
chr15	93337010	93337509	500	*	6.26	6.52	5.93	0.59	0.187	1	92	60.99	X00544	ENSMUSG00000022634	93284278	93336935	-	upstream	-325	75	NearestLocation	Yaf2
chr17	24206576	24207075	500	*	6.26	6.52	5.93	0.59	0.187	1	92	60.99	X00545	ENSMUSG00000036473	24175431	24205562	-	upstream	-1264	1014	NearestLocation	Ntn3;Tbc1d24
chr17	24206576	24207075	500	*	6.26	6.52	5.93	0.59	0.187	1	92	60.99	X00545	ENSMUSG00000079662	24203848	24209387	-	inside	2561	2312	Overlapping	NA
chr11	5955429	5955928	500	*	6.89	7.11	6.63	0.48	0.187	1	138	98.74	X00534	ENSMUSG00000002741	5955693	5967780	+	overlapStart	-15	235	NearestLocation	Ykt6
chr1	74855141	74855640	500	*	6.97	7.19	6.72	0.47	0.187	1	146	105.52	X00536	ENSMUSG00000089964	74850895	74879953	+	inside	4495	4246	Overlapping	NA
chr1	74855141	74855640	500	*	6.97	7.19	6.72	0.47	0.187	1	146	105.52	X00536	ENSMUSG00000090071	74854934	74857732	+	inside	456	207	NearestLocation	Cdk5r2
chr2	129800507	129801006	500	*	7.35	7.55	7.13	0.41	0.187	1	187	140.37	X00541	ENSMUSG00000037885	129800517	129832287	+	overlapStart	239	10	NearestLocation	Stk35
chr6	49319067	49319566	500	*	7.86	8.03	7.67	0.35	0.187	1	261	204.26	X00540	ENSMUSG00000050786	49319274	49341582	+	overlapStart	42	207	NearestLocation	Ccdc126
chr9	24781021	24781520	500	*	5.75	5.36	6.06	-0.7	0.187	1	41	66.8	X00542	ENSMUSG00000031965	24720812	24774303	-	upstream	-6967	6718	NearestLocation	Tbx20
chr11	69040176	69040675	500	*	5.66	5.25	5.98	-0.73	0.187	1	38	62.92	X00535	ENSMUSG00000020897	69045647	69051664	+	upstream	-5221	4972	NearestLocation	Aurkb
chr2	79456357	79456856	500	*	5.48	5.04	5.81	-0.77	0.187	1	33	56.15	X00537	ENSMUSG00000075256	79330543	79456785	-	overlapStart	179	71	NearestLocation	Cerkl
chr2	79456357	79456856	500	*	5.48	5.04	5.81	-0.77	0.187	1	33	56.15	X00537	ENSMUSG00000034701	79452521	79456751	-	overlapStart	145	105	NearestLocation	Neurod1
chr2	79456357	79456856	500	*	5.48	5.04	5.81	-0.77	0.187	1	33	56.15	X00537	ENSMUSG00000097843	79453985	79461107	+	inside	2621	2372	Overlapping	NA
chr8	47713758	47714257	500	*	7.29	7.48	7.06	0.42	0.188	1	179	133.59	X00547	ENSMUSG00000038069	47709344	47713931	-	overlapStart	-77	173	NearestLocation	Cdkn2aip
chr8	47713758	47714257	500	*	7.29	7.48	7.06	0.42	0.188	1	179	133.59	X00547	ENSMUSG00000097706	47713266	47715021	+	inside	742	492	Overlapping	NA
chr1	86487396	86487895	500	*	7.36	7.55	7.14	0.41	0.188	1	188	141.34	X00551	ENSMUSG00000101328	86473659	86474006	+	downstream	13987	13390	NearestLocation	NA
chr7	99858768	99859267	500	*	7.32	7.1	7.52	-0.42	0.188	1	137	182.96	X00550	ENSMUSG00000035227	99837569	99858883	-	overlapStart	-135	115	NearestLocation	Spcs2
chr7	99858768	99859267	500	*	7.32	7.1	7.52	-0.42	0.188	1	137	182.96	X00550	ENSMUSG00000035211	99859218	99917824	+	overlapStart	-200	49	NearestLocation	Xrra1
chr6	129533355	129533854	500	*	6.72	6.44	6.95	-0.51	0.188	1	87	123.91	X00546	ENSMUSG00000097675	129532094	129533272	-	upstream	-332	83	NearestLocation	1700101I11Rik
chr6	129533355	129533854	500	*	6.72	6.44	6.95	-0.51	0.188	1	87	123.91	X00546	ENSMUSG00000030161	129533200	129542331	+	inside	404	155	Overlapping	Gabarapl1
chr3	88579362	88579861	500	*	6.4	6.09	6.65	-0.57	0.188	1	68	100.68	X00549	ENSMUSG00000041355	88575876	88588419	+	inside	3736	3486	Overlapping	Ssr2
chr3	88579362	88579861	500	*	6.4	6.09	6.65	-0.57	0.188	1	68	100.68	X00549	ENSMUSG00000074479	88576410	88577139	-	upstream	-2473	2223	NearestLocation	NA
chr3	108840301	108840800	500	*	6.1	5.75	6.38	-0.62	0.188	1	54	83.25	X00548	ENSMUSG00000027882	108793176	108840526	-	overlapStart	-24	225	NearestLocation	Stxbp3
chr13	48878518	48879017	500	*	6.55	6.79	6.26	0.54	0.189	1	111	76.48	X00558	ENSMUSG00000086889	48871112	48875460	+	downstream	7656	3058	NearestLocation	NA
chr2	30237379	30237878	500	*	7.15	7.36	6.92	0.44	0.189	1	164	121.01	X00559	ENSMUSG00000100747	30236795	30238223	-	inside	595	345	Overlapping	NA
chr2	30237379	30237878	500	*	7.15	7.36	6.92	0.44	0.189	1	164	121.01	X00559	ENSMUSG00000007476	30237715	30263790	+	overlapStart	-87	163	NearestLocation	Lrrc8a
chr5	115908172	115908671	500	*	5.12	4.64	5.48	-0.83	0.189	1	25	44.53	X00555	ENSMUSG00000029516	115845278	116008947	+	inside	63144	62894	NearestLocation	Cit
chr8	31033133	31033632	500	*	5.12	4.64	5.48	-0.83	0.189	1	25	44.53	X00556	ENSMUSG00000039661	31089471	31097047	+	upstream	-56089	55839	NearestLocation	Dusp26
chrX	42068178	42068677	500	*	5.12	4.64	5.48	-0.83	0.189	1	25	44.53	X00557	ENSMUSG00000025860	42059679	42109656	+	inside	8749	8499	NearestLocation	Xiap
chr17	35231977	35232476	500	*	5.01	4.52	5.38	-0.86	0.189	1	23	41.63	X00552	ENSMUSG00000042419	35220175	35235792	-	inside	3566	3316	Overlapping	Nfkbil1
chr17	35231977	35232476	500	*	5.01	4.52	5.38	-0.86	0.189	1	23	41.63	X00552	ENSMUSG00000024403	35233660	35238767	+	upstream	-1434	1184	NearestLocation	Atp6v1g2
chr14	4110260	4110759	500	*	4.78	4.25	5.16	-0.91	0.189	1	19	35.82	X00553	ENSMUSG00000091563	4110526	4132784	+	overlapStart	-16	233	NearestLocation	NA
chr6	138422583	138423082	500	*	4.78	4.25	5.16	-0.91	0.189	1	19	35.82	X00554	ENSMUSG00000030226	138362918	138581968	-	inside	159136	59665	Overlapping	Lmo3
chr6	138422583	138423082	500	*	4.78	4.25	5.16	-0.91	0.189	1	19	35.82	X00554	ENSMUSG00000089957	138423105	138429592	+	upstream	-273	23	NearestLocation	A830011K09Rik
chr5	123930403	123930902	500	*	8.69	8.82	8.55	0.26	0.19	1	451	375.61	X00566	ENSMUSG00000061882	123927418	123969895	+	inside	3234	2985	NearestLocation	Ccdc62
chr15	102295961	102296460	500	*	6.54	6.25	6.79	-0.54	0.19	1	76	110.36	X00562	ENSMUSG00000058290	102296293	102324356	+	overlapStart	-83	167	NearestLocation	Espl1
chr10	121033672	121034171	500	*	6.34	6.02	6.6	-0.57	0.19	1	65	96.81	X00563	ENSMUSG00000020218	121033960	121100650	+	overlapStart	-38	211	NearestLocation	Wif1
chr6	23248697	23249196	500	*	6.34	6.02	6.6	-0.57	0.19	1	65	96.81	X00564	ENSMUSG00000029697	23245047	23248264	-	upstream	-682	433	NearestLocation	Fezf1
chr4	91376357	91376856	500	*	5.59	5.17	5.91	-0.74	0.19	1	36	60.02	X00565	ENSMUSG00000008489	91250763	91400785	-	inside	24179	23929	Overlapping	Elavl2
chr4	91376357	91376856	500	*	5.59	5.17	5.91	-0.74	0.19	1	36	60.02	X00565	ENSMUSG00000098563	91373284	91373363	-	upstream	-3243	2994	NearestLocation	Mir6402
chr7	27541483	27541982	500	*	5.31	4.86	5.65	-0.8	0.19	1	29	50.34	X00560	ENSMUSG00000003363	27532000	27553218	-	inside	11486	9483	NearestLocation	Pld3
chr17	32506551	32507050	500	*	5.22	4.75	5.57	-0.81	0.19	1	27	47.44	X00561	ENSMUSG00000091586	32506462	32528894	+	inside	338	89	NearestLocation	Cyp4f17
chr8	106300605	106301104	500	*	4.91	5.29	4.41	0.87	0.191	1	39	21.3	X00568	ENSMUSG00000097026	106237903	106425728	-	inside	124874	62702	Overlapping	NA
chr8	106300605	106301104	500	*	4.91	5.29	4.41	0.87	0.191	1	39	21.3	X00568	ENSMUSG00000031906	106252548	106337988	-	inside	37134	36884	Overlapping	Smpd3
chr8	106300605	106301104	500	*	4.91	5.29	4.41	0.87	0.191	1	39	21.3	X00568	ENSMUSG00000074113	106283307	106300017	+	downstream	17547	588	NearestLocation	NA
chr15	74329144	74329643	500	*	5.39	5.73	4.95	0.77	0.191	1	53	30.98	X00571	ENSMUSG00000034730	74516195	74589465	+	upstream	-186801	186552	NearestLocation	Adgrb1
chr6	48504090	48504589	500	*	5.61	5.93	5.2	0.73	0.191	1	61	36.79	X00567	ENSMUSG00000095526	48523518	48523850	+	upstream	-19178	18929	NearestLocation	NA
chr17	26780865	26781364	500	*	5.85	6.15	5.48	0.67	0.191	1	71	44.53	X00572	ENSMUSG00000024191	26781079	26792565	+	overlapStart	35	214	NearestLocation	Bnip1
chr2	71211726	71212225	500	*	7.71	7.88	7.52	0.37	0.191	1	236	182.96	X00569	ENSMUSG00000027012	71211706	71263303	+	inside	270	20	NearestLocation	Dync1i2
chr15	57695406	57695905	500	*	6.12	5.78	6.4	-0.61	0.191	1	55	84.22	X00570	ENSMUSG00000071757	57694665	57839832	+	inside	991	741	NearestLocation	Zhx2
chr5	117704303	117704802	500	*	5.17	5.52	4.71	0.82	0.192	1	46	26.14	X00576	ENSMUSG00000061578	117414000	117775003	+	inside	290552	70201	Overlapping	Ksr2
chr5	117704303	117704802	500	*	5.17	5.52	4.71	0.82	0.192	1	46	26.14	X00576	ENSMUSG00000029361	117781032	117958840	+	upstream	-76480	76230	NearestLocation	Nos1
chr8	104250735	104251234	500	*	5.51	5.83	5.08	0.75	0.192	1	57	33.88	X00574	ENSMUSG00000054400	104250903	104264936	+	overlapStart	81	168	NearestLocation	Cklf
chr11	58978094	58978593	500	*	6.19	6.46	5.86	0.6	0.192	1	88	58.08	X00575	ENSMUSG00000020455	58978093	58991458	+	inside	251	1	NearestLocation	Trim11
chr14	55721971	55722470	500	*	6.39	6.64	6.08	0.56	0.192	1	100	67.76	X00577	ENSMUSG00000040472	55715873	55722257	-	overlapStart	37	213	NearestLocation	Rabggta
chr15	89076238	89076737	500	*	5.68	5.29	6	-0.71	0.192	1	39	63.89	X00573	ENSMUSG00000087331	89071196	89075852	-	upstream	-636	386	NearestLocation	1810021B22Rik
chr15	89076238	89076737	500	*	5.68	5.29	6	-0.71	0.192	1	39	63.89	X00573	ENSMUSG00000015363	89075124	89087077	+	inside	1364	1114	Overlapping	Trabd
chr8	110755085	110755584	500	*	5.98	6.27	5.63	0.64	0.193	1	77	49.37	X00583	ENSMUSG00000031750	110741829	110805924	-	inside	50590	13256	Overlapping	Il34
chr8	110755085	110755584	500	*	5.98	6.27	5.63	0.64	0.193	1	77	49.37	X00583	ENSMUSG00000090039	110754992	110758970	+	inside	342	93	NearestLocation	NA
chr2	26444883	26445382	500	*	6.58	6.82	6.29	0.53	0.193	1	113	78.41	X00578	ENSMUSG00000026924	26409431	26445216	-	overlapStart	84	166	NearestLocation	Sec16a
chr8	26976727	26977226	500	*	6.67	6.91	6.4	0.51	0.193	1	120	84.22	X00582	ENSMUSG00000085795	26977336	26981461	+	upstream	-360	110	NearestLocation	Zfp703
chr15	3995419	3995918	500	*	7.05	6.81	7.26	-0.45	0.193	1	112	152.95	X00584	ENSMUSG00000041935	3982036	3995752	-	overlapStart	84	166	NearestLocation	AW549877
chr4	134401007	134401506	500	*	5.51	5.09	5.84	-0.75	0.193	1	34	57.12	X00580	ENSMUSG00000037366	134396320	134427413	+	inside	4936	4687	NearestLocation	Pafah2
chr8	10153862	10154361	500	*	5.51	5.09	5.84	-0.75	0.193	1	34	57.12	X00581	ENSMUSG00000039057	10272572	10634741	+	upstream	-118460	118211	NearestLocation	Myo16
chr17	17345677	17346176	500	*	3.77	3	4.28	-1.28	0.193	1	8	19.36	X00579	ENSMUSG00000043801	17345456	17346140	-	overlapStart	214	36	NearestLocation	NA
chr3	96287205	96287704	500	*	4.27	4.7	3.65	1.05	0.194	1	26	12.58	X00585	ENSMUSG00000015947	96282909	96293969	-	inside	6515	4296	NearestLocation	Fcgr1
chr11	65745886	65746385	500	*	5.07	5.43	4.6	0.83	0.194	1	43	24.2	X00591	ENSMUSG00000033352	65688243	65788297	-	inside	42161	41912	Overlapping	Map2k4
chr11	65745886	65746385	500	*	5.07	5.43	4.6	0.83	0.194	1	43	24.2	X00591	ENSMUSG00000076460	65734733	65734832	-	upstream	-11304	11054	NearestLocation	Mir744
chr3	95687694	95688193	500	*	5.07	5.43	4.6	0.83	0.194	1	43	24.2	X00592	ENSMUSG00000015850	95676201	95687917	-	overlapStart	-27	223	NearestLocation	Adamtsl4
chr7	67672584	67673083	500	*	5.07	5.43	4.6	0.83	0.194	1	43	24.2	X00593	ENSMUSG00000030555	67647410	67726576	+	inside	25424	25174	NearestLocation	Ttc23
chr11	75732693	75733192	500	*	6.21	6.48	5.88	0.59	0.194	1	89	59.05	X00588	ENSMUSG00000020849	75732869	75765845	+	overlapStart	73	176	NearestLocation	Ywhae
chr7	139894744	139895243	500	*	6.41	6.66	6.1	0.56	0.194	1	101	68.73	X00589	ENSMUSG00000066129	139894696	139941537	+	inside	298	48	NearestLocation	Kndc1
chr19	40830976	40831475	500	*	7.31	7.09	7.5	-0.41	0.194	1	136	181.03	X00590	ENSMUSG00000025010	40831279	40848572	+	overlapStart	-53	196	NearestLocation	Ccnj
chr11	103966756	103967255	500	*	6.82	6.55	7.04	-0.49	0.194	1	94	131.66	X00586	ENSMUSG00000062421	103966739	103985337	+	inside	267	17	NearestLocation	Arf2
chr13	99353011	99353510	500	*	5.97	5.61	6.26	-0.64	0.194	1	49	76.48	X00587	ENSMUSG00000041632	99344786	99415561	+	inside	8474	8225	NearestLocation	Mrps27
chr10	67537440	67537939	500	*	4.79	5.17	4.28	0.89	0.195	1	36	19.36	X00597	ENSMUSG00000037868	67535475	67542188	+	inside	2215	1965	NearestLocation	Egr2
chr2	73657181	73657680	500	*	5.3	5.64	4.86	0.78	0.195	1	50	29.04	X00600	ENSMUSG00000056486	73610660	73775346	-	inside	117916	46521	Overlapping	Chn1
chr2	73657181	73657680	500	*	5.3	5.64	4.86	0.78	0.195	1	50	29.04	X00600	ENSMUSG00000085838	73658270	73660263	+	upstream	-840	590	NearestLocation	NA
chr5	129590958	129591457	500	*	5.3	5.64	4.86	0.78	0.195	1	50	29.04	X00601	ENSMUSG00000029436	129584169	129608875	+	inside	7039	6789	NearestLocation	Mmp17
chr18	42401191	42401690	500	*	5.76	6.07	5.38	0.69	0.195	1	67	41.63	X00599	ENSMUSG00000024497	42394539	42397249	+	downstream	6901	3942	NearestLocation	Pou4f3
chr11	98348656	98349155	500	*	5.88	6.17	5.51	0.66	0.195	1	72	45.5	X00595	ENSMUSG00000061718	98348404	98357796	+	inside	502	252	NearestLocation	Ppp1r1b
chrX	74312818	74313317	500	*	5.88	6.17	5.51	0.66	0.195	1	72	45.5	X00596	ENSMUSG00000001962	74313033	74320149	+	overlapStart	35	215	NearestLocation	Fam50a
chr6	30048277	30048776	500	*	6.31	6.57	6	0.57	0.195	1	95	63.89	X00594	ENSMUSG00000058440	30047988	30153458	+	inside	538	289	NearestLocation	Nrf1
chr9	107601974	107602473	500	*	5.61	5.21	5.93	-0.72	0.195	1	37	60.99	X00598	ENSMUSG00000103409	107593841	107597075	-	upstream	-5149	4899	NearestLocation	NA
chr9	107601974	107602473	500	*	5.61	5.21	5.93	-0.72	0.195	1	37	60.99	X00598	ENSMUSG00000057969	107597674	107609229	-	inside	7005	4300	Overlapping	Sema3b
chr1	195017770	195018269	500	*	5.54	5.86	5.12	0.73	0.196	1	58	34.85	X00605	ENSMUSG00000096929	194976375	195037904	+	inside	41645	19635	Overlapping	A330023F24Rik
chr1	195017770	195018269	500	*	5.54	5.86	5.12	0.73	0.196	1	58	34.85	X00605	ENSMUSG00000104077	195017892	195018242	-	includeFeature	222	27	NearestLocation	NA
chr4	116877215	116877714	500	*	6	6.29	5.65	0.63	0.196	1	78	50.34	X00602	ENSMUSG00000033948	116877376	116989264	+	overlapStart	88	161	NearestLocation	Zswim5
chr8	71382035	71382534	500	*	6.12	6.39	5.79	0.61	0.196	1	84	55.18	X00604	ENSMUSG00000002393	71374123	71381960	-	upstream	-324	75	NearestLocation	Nr2f6
chr3	87566039	87566538	500	*	5.71	5.32	6.02	-0.7	0.196	1	40	64.86	X00603	ENSMUSG00000104058	87554910	87555434	+	downstream	11378	10605	NearestLocation	NA
chr14	101379163	101379662	500	*	4.66	5.04	4.12	0.92	0.197	1	33	17.43	X00616	ENSMUSG00000089041	101283067	101283202	+	downstream	96345	95961	NearestLocation	NA
chr12	27061106	27061605	500	*	5.43	5.75	5	0.76	0.197	1	54	31.95	X00610	ENSMUSG00000094002	27140796	27160633	-	downstream	99277	79191	NearestLocation	Gm9866
chr4	103119328	103119827	500	*	6.23	6.49	5.91	0.58	0.197	1	90	60.02	X00609	ENSMUSG00000035126	103038065	103114555	-	upstream	-5023	4773	NearestLocation	Wdr78
chr4	103119328	103119827	500	*	6.23	6.49	5.91	0.58	0.197	1	90	60.02	X00609	ENSMUSG00000028522	103114390	103165754	+	inside	5188	4938	Overlapping	Mier1
chr6	136518726	136519225	500	*	6.8	7.02	6.54	0.48	0.197	1	130	92.93	X00614	ENSMUSG00000030213	136518802	136611038	+	overlapStart	174	76	NearestLocation	Atf7ip
chr3	52268405	52268904	500	*	7.22	7.42	7	0.42	0.197	1	171	127.78	X00615	ENSMUSG00000044167	52268336	52353221	+	inside	318	69	NearestLocation	Foxo1
chr3	52268405	52268904	500	*	7.22	7.42	7	0.42	0.197	1	171	127.78	X00615	ENSMUSG00000092405	52268435	52269435	-	overlapEnd	781	30	Overlapping	NA
chr10	34019421	34019920	500	*	7.29	7.48	7.07	0.41	0.197	1	179	134.56	X00611	ENSMUSG00000019782	33996555	34019624	-	overlapStart	-46	203	NearestLocation	Rwdd1
chr4	152039081	152039580	500	*	9.11	9.22	9	0.22	0.197	1	596	512.11	X00608	ENSMUSG00000028948	152039321	152061494	+	overlapStart	9	240	NearestLocation	Nol9
chr9	92542157	92542656	500	*	7.41	7.2	7.6	-0.4	0.197	1	147	193.61	X00606	ENSMUSG00000103622	92538801	92542869	-	inside	463	213	Overlapping	B430319G15Rik
chr9	92542157	92542656	500	*	7.41	7.2	7.6	-0.4	0.197	1	147	193.61	X00606	ENSMUSG00000032374	92542223	92608428	+	overlapStart	183	66	NearestLocation	Plod2
chr14	66867826	66868325	500	*	6.77	6.51	7	-0.49	0.197	1	91	127.78	X00607	ENSMUSG00000022048	66802864	66868688	-	inside	612	363	NearestLocation	Dpysl2
chr12	3781472	3781971	500	*	5.06	4.58	5.41	-0.83	0.197	1	24	42.59	X00612	ENSMUSG00000071454	3572381	3781796	+	overlapEnd	209341	175	Overlapping	Dtnb
chr12	3781472	3781971	500	*	5.06	4.58	5.41	-0.83	0.197	1	24	42.59	X00612	ENSMUSG00000092286	3752543	3762146	-	upstream	-19576	19326	NearestLocation	NA
chr3	89315439	89315938	500	*	5.06	4.58	5.41	-0.83	0.197	1	24	42.59	X00613	ENSMUSG00000028039	89313899	89322965	-	inside	7277	1540	Overlapping	Efna3
chr3	89315439	89315938	500	*	5.06	4.58	5.41	-0.83	0.197	1	24	42.59	X00613	ENSMUSG00000086389	89315439	89318907	+	inside	249	0	NearestLocation	NA
chr7	79920551	79921050	500	*	5.9	6.19	5.54	0.65	0.198	1	73	46.47	X00617	ENSMUSG00000063801	79875332	79920640	-	overlapStart	-160	89	NearestLocation	Ap3s2
chr7	79920551	79921050	500	*	5.9	6.19	5.54	0.65	0.198	1	73	46.47	X00617	ENSMUSG00000097685	79916952	79920606	+	overlapEnd	3848	55	Overlapping	NA
chr7	79920551	79921050	500	*	5.9	6.19	5.54	0.65	0.198	1	73	46.47	X00617	ENSMUSG00000097699	79920755	79922521	+	overlapStart	45	204	NearestLocation	NA
chr6	84587532	84588031	500	*	6.53	6.77	6.24	0.53	0.198	1	109	75.51	X00619	ENSMUSG00000063415	84571414	84593908	-	inside	6126	5877	NearestLocation	Cyp26b1
chr2	30066411	30066910	500	*	6.62	6.86	6.35	0.51	0.198	1	116	81.32	X00621	ENSMUSG00000054766	30057378	30072577	+	inside	9282	5667	NearestLocation	Set
chr16	30252032	30252531	500	*	6.31	6	6.57	-0.57	0.198	1	64	94.87	X00620	ENSMUSG00000023176	30256378	30267532	-	downstream	15250	3847	NearestLocation	Cpn2
chr9	107666499	107666998	500	*	5.26	4.81	5.6	-0.79	0.198	1	28	48.4	X00618	ENSMUSG00000010064	107650634	107669530	-	inside	2782	2532	NearestLocation	Slc38a3
chr15	77367107	77367606	500	*	5.21	5.55	4.76	0.79	0.199	1	47	27.11	X00630	ENSMUSG00000093458	77391702	77392381	-	downstream	25025	24096	NearestLocation	NA
chr7	80025145	80025644	500	*	5.67	5.98	5.28	0.7	0.199	1	63	38.72	X00623	ENSMUSG00000048897	80024814	80092751	+	inside	580	331	NearestLocation	Zfp710
chr8	126986433	126986932	500	*	5.67	5.98	5.28	0.7	0.199	1	63	38.72	X00624	ENSMUSG00000033931	126947175	126971079	-	upstream	-15603	15354	NearestLocation	Rbm34
chr15	31531089	31531588	500	*	6.03	6.3	5.68	0.62	0.199	1	79	51.31	X00622	ENSMUSG00000039100	31455899	31531037	-	upstream	-301	52	NearestLocation	2006-03-01
chr15	79505348	79505847	500	*	6.14	6.41	5.81	0.6	0.199	1	85	56.15	X00631	ENSMUSG00000044216	79483718	79505241	-	upstream	-357	107	NearestLocation	Kcnj4
chr1	72307270	72307769	500	*	6.25	6.51	5.93	0.58	0.199	1	91	60.99	X00634	ENSMUSG00000026187	72307421	72394952	+	overlapStart	99	151	NearestLocation	Xrcc5
chr18	52768111	52768610	500	*	6.25	6.51	5.93	0.58	0.199	1	91	60.99	X00635	ENSMUSG00000024534	52767709	52915935	+	inside	651	402	NearestLocation	Sncaip
chr1	36368909	36369408	500	*	6.35	6.6	6.04	0.56	0.199	1	97	65.83	X00632	ENSMUSG00000010453	36335730	36369181	-	overlapStart	23	227	NearestLocation	Kansl3
chr2	180024704	180025203	500	*	6.9	7.12	6.65	0.47	0.199	1	139	100.68	X00629	ENSMUSG00000039108	180024987	180035465	+	overlapStart	-33	216	NearestLocation	Lsm14b
chr14	31251192	31251691	500	*	7.31	7.5	7.09	0.41	0.199	1	181	136.5	X00633	ENSMUSG00000021902	31237696	31251218	-	overlapStart	-224	26	NearestLocation	Phf7
chr14	31251192	31251691	500	*	7.31	7.5	7.09	0.41	0.199	1	181	136.5	X00633	ENSMUSG00000021901	31251450	31259944	+	overlapStart	-8	241	NearestLocation	Bap1
chr9	66511597	66512096	500	*	7.45	7.63	7.24	0.39	0.199	1	198	151.02	X00628	ENSMUSG00000050503	66508459	66514593	-	inside	2747	2497	NearestLocation	Fbxl22
chr17	36031505	36032004	500	*	5.54	5.13	5.86	-0.73	0.199	1	35	58.08	X00625	ENSMUSG00000092368	35994453	36038435	+	inside	37301	6431	Overlapping	NA
chr17	36031505	36032004	500	*	5.54	5.13	5.86	-0.73	0.199	1	35	58.08	X00625	ENSMUSG00000067212	36029773	36032855	-	inside	1101	851	NearestLocation	H2-T23
chr4	147443003	147443502	500	*	5.54	5.13	5.86	-0.73	0.199	1	35	58.08	X00626	ENSMUSG00000097168	147018235	147492201	-	inside	48949	48699	Overlapping	NA
chr4	147443003	147443502	500	*	5.54	5.13	5.86	-0.73	0.199	1	35	58.08	X00626	ENSMUSG00000097122	147136278	147457019	+	inside	306974	13517	Overlapping	NA
chr4	147443003	147443502	500	*	5.54	5.13	5.86	-0.73	0.199	1	35	58.08	X00626	ENSMUSG00000082248	147443471	147444029	+	overlapStart	-219	31	NearestLocation	NA
chr7	73399497	73399996	500	*	5.54	5.13	5.86	-0.73	0.199	1	35	58.08	X00627	ENSMUSG00000097756	73314003	73375739	-	upstream	-24007	23758	NearestLocation	A730056A06Rik
chr7	73399497	73399996	500	*	5.54	5.13	5.86	-0.73	0.199	1	35	58.08	X00627	ENSMUSG00000070509	73375520	73419899	+	inside	24226	19903	Overlapping	Rgma
chr11	79704050	79704549	500	*	6.54	6.78	6.26	0.52	0.2	1	110	76.48	X00636	ENSMUSG00000084969	79704630	79705420	+	upstream	-330	81	NearestLocation	Gm11205
chr11	114066477	114066976	500	*	6.83	7.04	6.57	0.48	0.2	1	132	94.87	X00640	ENSMUSG00000041592	113776374	114067046	-	inside	320	70	NearestLocation	Sdk2
chr10	30802729	30803228	500	*	6.92	7.13	6.67	0.46	0.2	1	140	101.65	X00641	ENSMUSG00000039697	30645584	30803107	-	overlapStart	129	121	NearestLocation	Ncoa7
chr6	115135001	115135500	500	*	7	7.21	6.76	0.45	0.2	1	148	108.42	X00638	ENSMUSG00000009394	115134902	115282626	+	inside	348	99	NearestLocation	Syn2
chr5	143314920	143315419	500	*	7.24	7.43	7.02	0.42	0.2	1	173	129.72	X00637	ENSMUSG00000039244	143301195	143315360	-	overlapStart	190	59	NearestLocation	E130309D02Rik
chr4	107802518	107803017	500	*	6.67	6.39	6.9	-0.5	0.2	1	84	119.07	X00639	ENSMUSG00000028613	107802261	107876840	+	inside	507	257	NearestLocation	Lrp8
chr10	115362221	115362720	500	*	5.57	5.88	5.16	0.72	0.201	1	59	35.82	X00646	ENSMUSG00000069520	115340739	115362262	-	overlapStart	-208	41	NearestLocation	Tmem19
chr5	147725244	147725743	500	*	6.36	6.61	6.06	0.55	0.201	1	98	66.8	X00649	ENSMUSG00000029648	147561604	147726011	-	inside	517	268	NearestLocation	Flt1
chr19	4257534	4258033	500	*	6.74	6.97	6.48	0.49	0.201	1	125	89.06	X00648	ENSMUSG00000099290	4263818	4263878	-	downstream	6094	5785	NearestLocation	Mir6985
chr4	49631778	49632277	500	*	6.33	6.02	6.58	-0.56	0.201	1	65	95.84	X00647	ENSMUSG00000028309	49632006	49656887	+	overlapStart	22	228	NearestLocation	Rnf20
chr2	165288390	165288889	500	*	5.83	5.46	6.12	-0.66	0.201	1	44	69.7	X00642	ENSMUSG00000017664	165276554	165287869	-	upstream	-771	521	NearestLocation	Slc35c2
chr2	165288390	165288889	500	*	5.83	5.46	6.12	-0.66	0.201	1	44	69.7	X00642	ENSMUSG00000017670	165288031	165326479	-	inside	37839	359	Overlapping	Elmo2
chr6	72414034	72414533	500	*	5.74	5.36	6.04	-0.68	0.201	1	41	65.83	X00644	ENSMUSG00000053460	72414308	72430712	+	overlapStart	-24	225	NearestLocation	Ggcx
chr7	49146075	49146574	500	*	5.74	5.36	6.04	-0.68	0.201	1	41	65.83	X00645	ENSMUSG00000052512	48908716	49610090	+	inside	237608	237359	Overlapping	Nav2
chr7	49146075	49146574	500	*	5.74	5.36	6.04	-0.68	0.201	1	41	65.83	X00645	ENSMUSG00000103834	49195541	49199120	+	upstream	-49217	48967	NearestLocation	NA
chr7	70280336	70280835	500	*	5.64	5.25	5.95	-0.71	0.201	1	38	61.96	X00643	ENSMUSG00000099387	70248973	70249776	-	upstream	-30810	30560	NearestLocation	NA
chr11	97026034	97026533	500	*	5.11	5.46	4.65	0.81	0.202	1	44	25.17	X00655	ENSMUSG00000087067	97020508	97026248	-	overlapStart	-36	214	NearestLocation	NA
chr1	119053342	119053841	500	*	6.16	6.43	5.84	0.59	0.202	1	86	57.12	X00650	ENSMUSG00000048402	118834132	119053619	-	overlapStart	27	222	NearestLocation	Gli2
chr6	88044807	88045306	500	*	6.56	6.79	6.28	0.52	0.202	1	111	77.45	X00651	ENSMUSG00000079477	87999106	88045270	-	overlapStart	214	36	NearestLocation	Rab7
chr14	63606892	63607391	500	*	6.65	6.88	6.38	0.5	0.202	1	118	83.25	X00652	ENSMUSG00000087652	63602524	63607372	-	overlapStart	230	19	NearestLocation	NA
chr14	63606892	63607391	500	*	6.65	6.88	6.38	0.5	0.202	1	118	83.25	X00652	ENSMUSG00000035067	63606503	63820809	+	inside	639	389	Overlapping	Xkr6
chr4	137357014	137357513	500	*	6.65	6.88	6.38	0.5	0.202	1	118	83.25	X00653	ENSMUSG00000006699	137319696	137357720	-	inside	456	207	NearestLocation	Cdc42
chr9	108347544	108348043	500	*	6.65	6.88	6.38	0.5	0.202	1	118	83.25	X00654	ENSMUSG00000032612	108347853	108392545	+	overlapStart	-59	190	NearestLocation	Usp4
chr11	120236415	120236914	500	*	6.41	6.11	6.65	-0.55	0.202	1	69	100.68	X00656	ENSMUSG00000039741	120232947	120292296	+	inside	3717	3468	Overlapping	Bahcc1
chr11	120236415	120236914	500	*	6.41	6.11	6.65	-0.55	0.202	1	69	100.68	X00656	ENSMUSG00000085501	120235234	120236122	-	upstream	-542	293	NearestLocation	NA
chr14	121698026	121698525	500	*	4.84	5.21	4.35	0.86	0.203	1	37	20.33	X00661	ENSMUSG00000025558	121542039	121797734	-	inside	99458	99209	NearestLocation	Dock9
chr5	99202456	99202955	500	*	4.84	5.21	4.35	0.86	0.203	1	37	20.33	X00662	ENSMUSG00000029333	99217426	99252927	-	downstream	50221	14471	NearestLocation	Rasgef1b
chr12	112679064	112679563	500	*	5.7	6	5.31	0.69	0.203	1	64	39.69	X00657	ENSMUSG00000037638	112678828	112682747	+	inside	486	236	NearestLocation	Zbtb42
chr8	126920801	126921300	500	*	5.7	6	5.31	0.69	0.203	1	64	39.69	X00658	ENSMUSG00000065637	126944847	126944980	-	downstream	23930	23547	NearestLocation	NA
chr4	94556534	94557033	500	*	6.47	6.71	6.18	0.53	0.203	1	105	72.6	X00660	ENSMUSG00000028578	94500081	94556796	-	overlapStart	12	237	NearestLocation	Caap1
chr4	94556534	94557033	500	*	6.47	6.71	6.18	0.53	0.203	1	105	72.6	X00660	ENSMUSG00000070900	94556546	94557078	+	overlapStart	238	12	NearestLocation	NA
chr4	130792589	130793088	500	*	6.76	6.98	6.49	0.48	0.203	1	126	90.03	X00659	ENSMUSG00000025743	130792537	130826319	+	inside	301	52	NearestLocation	Sdc3
chr5	115340958	115341457	500	*	7.11	7.31	6.88	0.43	0.203	1	159	118.1	X00664	ENSMUSG00000029536	115333242	115341178	-	overlapStart	-30	220	NearestLocation	Gatc
chr5	115340958	115341457	500	*	7.11	7.31	6.88	0.43	0.203	1	159	118.1	X00664	ENSMUSG00000029535	115341225	115343569	+	overlapStart	-17	232	NearestLocation	Triap1
chr1	179803434	179803933	500	*	8.97	9.08	8.85	0.23	0.203	1	540	460.8	X00666	ENSMUSG00000026491	179744894	179803680	-	overlapStart	-4	246	NearestLocation	Ahctf1
chr1	179803434	179803933	500	*	8.97	9.08	8.85	0.23	0.203	1	540	460.8	X00666	ENSMUSG00000073486	179803376	179804676	+	inside	308	58	Overlapping	NA
chr1	4491758	4492257	500	*	6.81	6.55	7.03	-0.48	0.203	1	94	130.69	X00663	ENSMUSG00000025902	4490931	4497354	-	inside	5346	827	Overlapping	Sox17
chr1	4491758	4492257	500	*	6.81	6.55	7.03	-0.48	0.203	1	94	130.69	X00663	ENSMUSG00000104238	4496551	4499558	+	upstream	-4543	4294	NearestLocation	NA
chr15	5242375	5242874	500	*	6.11	5.78	6.38	-0.6	0.203	1	55	83.25	X00667	ENSMUSG00000039942	5206661	5244187	-	inside	1563	1313	NearestLocation	Ptger4
chr15	74535684	74536183	500	*	6.11	5.78	6.38	-0.6	0.203	1	55	83.25	X00668	ENSMUSG00000034730	74516195	74589465	+	inside	19739	19489	NearestLocation	Adgrb1
chr15	101078678	101079177	500	*	5.94	5.58	6.22	-0.63	0.203	1	48	74.54	X00665	ENSMUSG00000095440	101050194	101054399	-	upstream	-24529	24279	NearestLocation	Fignl2
chr15	35299465	35299964	500	*	5.95	6.23	5.6	0.63	0.204	1	75	48.4	X00670	ENSMUSG00000022330	35296098	35303304	+	inside	3616	3340	NearestLocation	Osr2
chr2	132879227	132879726	500	*	6.07	6.34	5.73	0.61	0.204	1	81	53.24	X00673	ENSMUSG00000043110	132868305	132880891	-	inside	1415	1165	NearestLocation	Lrrn4
chr6	115601824	115602323	500	*	6.07	6.34	5.73	0.61	0.204	1	81	53.24	X00674	ENSMUSG00000000439	115601938	115618670	+	overlapStart	136	114	NearestLocation	Mkrn2
chr3	69598292	69599191	900	*	6.95	7.16	6.71	0.45	0.204	1	143	104.55	X00675	ENSMUSG00000043300	69574158	69598960	-	overlapStart	218	231	NearestLocation	B3galnt1
chr13	54565100	54565599	500	*	8.73	8.85	8.6	0.25	0.204	1	461	387.23	X00669	ENSMUSG00000025871	54551218	54565435	-	overlapStart	85	164	NearestLocation	4833439L19Rik
chr16	31429091	31429590	500	*	7.36	7.15	7.55	-0.4	0.204	1	142	186.84	X00676	ENSMUSG00000046598	31422280	31458901	+	inside	7060	6811	Overlapping	Bdh1
chr16	31429091	31429590	500	*	7.36	7.15	7.55	-0.4	0.204	1	142	186.84	X00676	ENSMUSG00000086645	31427876	31429776	-	inside	436	186	NearestLocation	NA
chr2	35297847	35298346	500	*	5.38	4.95	5.71	-0.75	0.204	1	31	52.28	X00671	ENSMUSG00000026879	35279663	35307892	+	inside	18433	9546	NearestLocation	Gsn
chr5	106802329	106802828	500	*	5.38	4.95	5.71	-0.75	0.204	1	31	52.28	X00672	ENSMUSG00000098703	106879600	106879698	-	downstream	77120	76772	NearestLocation	NA
chr6	83109106	83109605	500	*	6.59	6.82	6.31	0.51	0.205	1	113	79.38	X00684	ENSMUSG00000079511	83101617	83109939	+	inside	7739	334	Overlapping	Ccdc142
chr6	83109106	83109605	500	*	6.59	6.82	6.31	0.51	0.205	1	113	79.38	X00684	ENSMUSG00000030037	83109095	83109939	+	inside	261	11	NearestLocation	Mrpl53
chr15	41447385	41447884	500	*	6.86	7.08	6.61	0.47	0.205	1	135	97.77	X00677	ENSMUSG00000022307	41447482	41861048	+	overlapStart	152	97	NearestLocation	Oxr1
chr11	119085854	119086353	500	*	7.21	7.4	6.99	0.41	0.205	1	169	126.82	X00682	ENSMUSG00000039989	119077573	119086221	-	overlapStart	117	132	NearestLocation	Cbx4
chr2	68861467	68861966	500	*	7.11	6.88	7.31	-0.43	0.205	1	118	158.76	X00678	ENSMUSG00000027035	68861441	69114282	+	inside	275	26	NearestLocation	Cers6
chr19	6418346	6418845	500	*	6.69	6.43	6.92	-0.49	0.205	1	86	121.01	X00680	ENSMUSG00000084876	6409400	6418606	-	overlapStart	10	239	NearestLocation	Gm14965
chr19	6418346	6418845	500	*	6.69	6.43	6.92	-0.49	0.205	1	86	121.01	X00680	ENSMUSG00000033768	6418731	6544169	+	overlapStart	-135	114	NearestLocation	Nrxn2
chr5	92277823	92278322	500	*	6.69	6.43	6.92	-0.49	0.205	1	86	121.01	X00681	ENSMUSG00000029413	92257659	92278170	-	overlapStart	98	152	NearestLocation	Naaa
chr15	32778689	32779188	500	*	6.04	5.7	6.31	-0.61	0.205	1	52	79.38	X00683	ENSMUSG00000022261	32920723	33034730	+	upstream	-141785	141535	NearestLocation	Sdc2
chr5	122951992	122952491	500	*	5.85	5.49	6.14	-0.65	0.205	1	45	70.67	X00679	ENSMUSG00000029475	122870668	123015080	-	inside	62838	62589	Overlapping	Kdm2b
chr5	122951992	122952491	500	*	5.85	5.49	6.14	-0.65	0.205	1	45	70.67	X00679	ENSMUSG00000056735	122989354	122998345	+	upstream	-37112	36863	NearestLocation	A930024E05Rik
chr10	119819396	119819895	500	*	5.01	5.36	4.54	0.82	0.206	1	41	23.23	X00689	ENSMUSG00000034813	119454034	120087261	+	inside	365612	267366	Overlapping	Grip1
chr10	119819396	119819895	500	*	5.01	5.36	4.54	0.82	0.206	1	41	23.23	X00689	ENSMUSG00000085418	119825204	119852390	-	downstream	32744	5309	NearestLocation	NA
chr14	25185486	25185985	500	*	5.01	5.36	4.54	0.82	0.206	1	41	23.23	X00690	ENSMUSG00000097601	25355801	25378635	-	downstream	192899	169816	NearestLocation	Zmiz1os1
chr14	76882831	76883330	500	*	5.25	5.58	4.81	0.77	0.206	1	48	28.07	X00688	ENSMUSG00000034795	77036772	77112257	+	upstream	-153692	153442	NearestLocation	Ccdc122
chr7	19076237	19076736	500	*	5.72	6.02	5.35	0.68	0.206	1	65	40.66	X00695	ENSMUSG00000030410	19076249	19082776	+	overlapStart	237	12	NearestLocation	Dmwd
chr7	45866066	45866565	500	*	5.72	6.02	5.35	0.68	0.206	1	65	40.66	X00696	ENSMUSG00000002771	45831883	45870928	-	inside	4612	4363	NearestLocation	Grin2d
chr15	36210425	36210924	500	*	6.4	6.64	6.1	0.54	0.206	1	100	68.73	X00693	ENSMUSG00000037617	36179368	36235610	+	inside	31306	24686	Overlapping	Spag1
chr15	36210425	36210924	500	*	6.4	6.64	6.1	0.54	0.206	1	100	68.73	X00693	ENSMUSG00000088201	36205260	36205322	+	downstream	5414	5103	NearestLocation	NA
chr10	60277428	60277927	500	*	6.78	7	6.52	0.48	0.206	1	128	91.97	X00691	ENSMUSG00000004207	60277627	60302597	+	overlapStart	51	199	NearestLocation	Psap
chr12	110889104	110889603	500	*	6.78	7	6.52	0.48	0.206	1	128	91.97	X00692	ENSMUSG00000021276	110872610	110889145	-	overlapStart	-209	41	NearestLocation	Cinp
chr12	110889104	110889603	500	*	6.78	7	6.52	0.48	0.206	1	128	91.97	X00692	ENSMUSG00000021275	110889264	110972394	+	overlapStart	90	160	NearestLocation	Tecpr2
chr7	27731136	27731635	500	*	6.63	6.36	6.86	-0.5	0.206	1	82	116.17	X00685	ENSMUSG00000037640	27731389	27753702	+	overlapStart	-3	246	NearestLocation	Zfp60
chr7	3692773	3693272	500	*	6.5	6.21	6.73	-0.53	0.206	1	74	106.49	X00686	ENSMUSG00000035596	3677790	3693523	-	inside	501	251	Overlapping	Mboat7
chr7	3692773	3693272	500	*	6.5	6.21	6.73	-0.53	0.206	1	74	106.49	X00686	ENSMUSG00000035585	3693375	3701023	+	upstream	-353	103	NearestLocation	Tsen34
chr11	53763611	53764110	500	*	5.77	5.39	6.06	-0.67	0.206	1	42	66.8	X00687	ENSMUSG00000099153	53763597	53763654	-	overlapStart	-206	14	NearestLocation	Mir7671
chr7	16948909	16949408	500	*	5.1	4.64	5.45	-0.8	0.206	1	25	43.56	X00694	ENSMUSG00000064689	16953395	16953501	-	downstream	4343	3987	NearestLocation	NA
chr1	176275029	176275528	500	*	5.37	5.7	4.95	0.75	0.207	1	52	30.98	X00708	ENSMUSG00000055214	175962306	176275312	-	overlapStart	34	216	NearestLocation	Pld5
chr5	113314026	113314525	500	*	5.37	5.7	4.95	0.75	0.207	1	52	30.98	X00709	ENSMUSG00000042216	113243220	113310786	-	upstream	-3490	3240	NearestLocation	Sgsm1
chrX	75577796	75578295	500	*	5.37	5.7	4.95	0.75	0.207	1	52	30.98	X00710	ENSMUSG00000031202	75572046	75578231	-	overlapStart	185	64	NearestLocation	Rab39b
chr16	30070482	30070981	500	*	5.49	5.81	5.08	0.72	0.207	1	56	33.88	X00704	ENSMUSG00000022528	30064384	30067796	+	downstream	6348	2686	NearestLocation	Hes1
chr4	44168102	44168601	500	*	5.49	5.81	5.08	0.72	0.207	1	56	33.88	X00705	ENSMUSG00000084274	44121893	44124123	+	downstream	46459	43979	NearestLocation	Gm12504
chr4	44168102	44168601	500	*	5.49	5.81	5.08	0.72	0.207	1	56	33.88	X00705	ENSMUSG00000035696	44126210	44233789	-	inside	65437	41892	Overlapping	Rnf38
chr5	22344345	22344844	500	*	5.49	5.81	5.08	0.72	0.207	1	56	33.88	X00706	ENSMUSG00000042453	21884454	22344702	-	overlapStart	108	142	NearestLocation	Reln
chr1	33670055	33670554	500	*	5.97	6.25	5.63	0.62	0.207	1	76	49.37	X00697	ENSMUSG00000103746	33669824	33670712	+	inside	480	158	NearestLocation	1700001G17Rik
chr15	44752720	44753219	500	*	5.97	6.25	5.63	0.62	0.207	1	76	49.37	X00698	ENSMUSG00000022340	44671859	44788063	-	inside	35093	34844	Overlapping	Sybu
chr15	44752720	44753219	500	*	5.97	6.25	5.63	0.62	0.207	1	76	49.37	X00698	ENSMUSG00000097102	44787782	44805827	+	upstream	-34812	34563	NearestLocation	2310069G16Rik
chr11	29247124	29247623	500	*	6.09	6.36	5.76	0.6	0.207	1	82	54.21	X00699	ENSMUSG00000020462	29221532	29247409	-	overlapStart	35	214	NearestLocation	Cfap36
chr18	40219153	40219652	500	*	6.2	6.46	5.88	0.58	0.207	1	88	59.05	X00700	ENSMUSG00000024487	40204865	40219399	-	overlapStart	-3	246	NearestLocation	Yipf5
chr6	38533534	38534033	500	*	6.2	6.46	5.88	0.58	0.207	1	88	59.05	X00701	ENSMUSG00000019689	38533502	38539449	+	inside	282	32	NearestLocation	1110001J03Rik
chr1	191025672	191026171	500	*	6.97	7.18	6.73	0.45	0.207	1	145	106.49	X00702	ENSMUSG00000066595	191005847	191026158	-	overlapStart	236	13	NearestLocation	Mfsd7b
chr1	191025672	191026171	500	*	6.97	7.18	6.73	0.45	0.207	1	145	106.49	X00702	ENSMUSG00000097845	191025350	191029781	+	inside	572	322	Overlapping	A230020J21Rik
chr10	80264577	80265076	500	*	6.97	7.18	6.73	0.45	0.207	1	145	106.49	X00703	ENSMUSG00000069565	80261486	80288408	+	inside	3340	3091	NearestLocation	Dazap1
chr13	94285113	94285612	500	*	7.23	7.42	7.01	0.41	0.207	1	171	128.75	X00713	ENSMUSG00000021687	94201310	94285857	-	inside	495	245	NearestLocation	Scamp1
chr17	15497990	15498489	500	*	6.36	6.07	6.61	-0.55	0.207	1	67	97.77	X00711	ENSMUSG00000014769	15475721	15498276	-	overlapStart	36	213	NearestLocation	Psmb1
chr5	146584499	146584998	500	*	6.36	6.07	6.61	-0.55	0.207	1	67	97.77	X00712	ENSMUSG00000041468	146582151	146585239	-	inside	491	241	NearestLocation	Gpr12
chr14	54576708	54577207	500	*	5.96	5.61	6.24	-0.62	0.207	1	49	75.51	X00707	ENSMUSG00000022178	54567469	54577661	-	inside	703	454	NearestLocation	Ajuba
chr9	123112981	123113480	500	*	7.31	7.49	7.09	0.4	0.208	1	180	136.5	X00714	ENSMUSG00000025786	123066160	123113205	-	overlapStart	-25	224	NearestLocation	Zdhhc3
chr9	123112981	123113480	500	*	7.31	7.49	7.09	0.4	0.208	1	180	136.5	X00714	ENSMUSG00000025785	123113215	123136129	+	overlapStart	15	234	NearestLocation	Exosc7
chr19	45016807	45017804	998	*	6.58	6.3	6.81	-0.51	0.208	1	79	112.3	X00720	ENSMUSG00000035342	45015176	45027104	+	inside	2130	1631	NearestLocation	Lzts2
chr19	6400431	6400930	500	*	5.49	5.09	5.81	-0.72	0.208	1	34	56.15	X00715	ENSMUSG00000032946	6399340	6415216	+	inside	1340	1091	NearestLocation	Rasgrp2
chr5	18087985	18088484	500	*	5.49	5.09	5.81	-0.72	0.208	1	34	56.15	X00716	ENSMUSG00000028777	17962621	18019834	+	downstream	125613	68151	NearestLocation	Gnat3
chr13	78181171	78181670	500	*	4.88	4.39	5.24	-0.85	0.208	1	21	37.75	X00717	ENSMUSG00000087143	78198017	78279391	+	upstream	-16597	16347	NearestLocation	NA
chr3	129208385	129208884	500	*	4.88	4.39	5.24	-0.85	0.208	1	21	37.75	X00718	ENSMUSG00000028023	129199878	129219591	+	inside	8756	8507	Overlapping	Pitx2
chr3	129208385	129208884	500	*	4.88	4.39	5.24	-0.85	0.208	1	21	37.75	X00718	ENSMUSG00000098515	129210006	129211500	+	upstream	-1372	1122	NearestLocation	NA
chr7	128689185	128689684	500	*	4.88	4.39	5.24	-0.85	0.208	1	21	37.75	X00719	ENSMUSG00000042105	128611328	128696425	+	inside	78106	6741	Overlapping	Inpp5f
chr7	128689185	128689684	500	*	4.88	4.39	5.24	-0.85	0.208	1	21	37.75	X00719	ENSMUSG00000081339	128692689	128693138	+	upstream	-3255	3005	NearestLocation	NA
chr16	16559420	16559919	500	*	5.15	5.49	4.71	0.78	0.209	1	45	26.14	X00731	ENSMUSG00000022788	16416917	16600549	-	inside	40879	40630	Overlapping	Fgd4
chr16	16559420	16559919	500	*	5.15	5.49	4.71	0.78	0.209	1	45	26.14	X00731	ENSMUSG00000089861	16542323	16542742	+	downstream	17347	16678	NearestLocation	NA
chr18	74207460	74207959	500	*	5.15	5.49	4.71	0.78	0.209	1	45	26.14	X00732	ENSMUSG00000036223	74195299	74207818	-	overlapStart	108	141	NearestLocation	Ska1
chr3	144616967	144617466	500	*	5.15	5.49	4.71	0.78	0.209	1	45	26.14	X00733	ENSMUSG00000064960	144586825	144586952	-	upstream	-30264	30015	NearestLocation	NA
chr7	4684027	4684526	500	*	5.15	5.49	4.71	0.78	0.209	1	45	26.14	X00734	ENSMUSG00000063802	4660521	4684963	-	inside	687	437	NearestLocation	Hspbp1
chr15	8443693	8444192	500	*	6.11	6.38	5.79	0.59	0.209	1	83	55.18	X00735	ENSMUSG00000022141	8291225	8444463	-	inside	521	271	NearestLocation	Nipbl
chr10	108332576	108333075	500	*	6.22	6.48	5.91	0.57	0.209	1	89	60.02	X00730	ENSMUSG00000035873	108332189	108414391	+	inside	637	387	NearestLocation	Pawr
chr1	159231699	159232198	500	*	6.32	6.57	6.02	0.55	0.209	1	95	64.86	X00724	ENSMUSG00000040782	159232320	159347640	+	upstream	-372	122	NearestLocation	Rfwd2
chr6	88105991	88106490	500	*	6.32	6.57	6.02	0.55	0.209	1	95	64.86	X00725	ENSMUSG00000099095	88104128	88104258	-	upstream	-1982	1733	NearestLocation	Mir6376
chr9	114562838	114563337	500	*	6.32	6.57	6.02	0.55	0.209	1	95	64.86	X00726	ENSMUSG00000079259	114507133	114564369	-	inside	1281	1032	NearestLocation	Trim71
chr11	77493652	77494151	500	*	6.52	6.75	6.24	0.52	0.209	1	108	75.51	X00728	ENSMUSG00000011877	77493562	77507786	+	inside	340	90	NearestLocation	Git1
chr8	25518635	25519134	500	*	6.52	6.75	6.24	0.52	0.209	1	108	75.51	X00729	ENSMUSG00000031565	25513654	25575714	+	inside	5230	4981	NearestLocation	Fgfr1
chr3	41564940	41565439	500	*	7.16	7.36	6.94	0.42	0.209	1	164	122.94	X00736	ENSMUSG00000025764	41555731	41616864	+	inside	9459	9209	Overlapping	Jade1
chr3	41564940	41565439	500	*	7.16	7.36	6.94	0.42	0.209	1	164	122.94	X00736	ENSMUSG00000103843	41562279	41563698	-	upstream	-1492	1242	NearestLocation	NA
chr13	23739284	23739783	500	*	5.88	5.52	6.16	-0.64	0.209	1	46	71.64	X00727	ENSMUSG00000036181	23738808	23740367	+	inside	726	476	NearestLocation	Hist1h1c
chr2	38658413	38658912	500	*	4.75	4.25	5.12	-0.88	0.209	1	19	34.85	X00722	ENSMUSG00000083722	38671158	38687651	+	upstream	-12496	12246	NearestLocation	NA
chrX	7714180	7714679	500	*	4.75	4.25	5.12	-0.88	0.209	1	19	34.85	X00723	ENSMUSG00000086853	7714333	7722100	+	overlapStart	97	153	NearestLocation	NA
chr13	22035967	22036466	500	*	3.87	3.17	4.35	-1.18	0.209	1	9	20.33	X00721	ENSMUSG00000062727	22035870	22036345	+	overlapEnd	346	97	NearestLocation	Hist1h2bk
chr3	130709041	130709540	500	*	5.63	5.93	5.24	0.69	0.21	1	61	37.75	X00739	ENSMUSG00000041084	130695921	130709444	-	overlapStart	154	96	NearestLocation	Ostc
chr11	60727003	60727502	500	*	6.43	6.67	6.14	0.53	0.21	1	102	70.67	X00745	ENSMUSG00000002812	60714123	60727263	-	overlapStart	11	239	NearestLocation	Flii
chr16	57606533	57607032	500	*	6.43	6.67	6.14	0.53	0.21	1	102	70.67	X00746	ENSMUSG00000022748	57302199	57606825	-	overlapStart	43	207	NearestLocation	Cmss1
chr9	64737354	64737853	500	*	6.72	6.94	6.46	0.48	0.21	1	123	88.09	X00743	ENSMUSG00000004771	64715299	64737758	-	overlapStart	154	95	NearestLocation	Rab11a
chr17	47139940	47140439	500	*	6.91	7.12	6.67	0.45	0.21	1	139	101.65	X00744	ENSMUSG00000064043	47140875	47361958	+	upstream	-685	436	NearestLocation	NA
chr4	133277380	133277879	500	*	7	7.2	6.76	0.44	0.21	1	147	108.42	X00738	ENSMUSG00000028857	133266045	133277792	-	overlapStart	162	87	NearestLocation	Tmem222
chr14	50930750	50931249	500	*	7.25	7.43	7.03	0.4	0.21	1	173	130.69	X00741	ENSMUSG00000035953	50926070	50930856	-	overlapStart	-144	106	NearestLocation	Tmem55b
chr11	21571662	21572161	500	*	7.57	7.38	7.74	-0.37	0.21	1	166	213.94	X00742	ENSMUSG00000020321	21556787	21572367	-	inside	455	206	Overlapping	Mdh1
chr11	21571662	21572161	500	*	7.57	7.38	7.74	-0.37	0.21	1	166	213.94	X00742	ENSMUSG00000020319	21572235	21898989	+	upstream	-323	74	NearestLocation	Wdpcp
chr6	143099369	143099868	500	*	7.03	6.79	7.23	-0.43	0.21	1	111	150.05	X00737	ENSMUSG00000030279	143010920	143100107	-	inside	489	239	NearestLocation	C2cd5
chr10	81570811	81571310	500	*	6.3	6	6.55	-0.55	0.21	1	64	93.9	X00740	ENSMUSG00000034771	81574561	81590845	+	upstream	-3501	3251	NearestLocation	Tle2
chr5	130144831	130145330	500	*	6.82	7.03	6.57	0.47	0.211	1	131	94.87	X00747	ENSMUSG00000034110	130144861	130155806	+	overlapStart	219	30	NearestLocation	Kctd7
chr14	37134968	37135467	500	*	6.92	6.67	7.12	-0.45	0.211	1	102	139.4	X00749	ENSMUSG00000041028	37120444	37135322	-	overlapStart	104	145	NearestLocation	Ghitm
chr18	80256390	80256889	500	*	6.59	6.32	6.82	-0.5	0.211	1	80	113.26	X00751	ENSMUSG00000034006	80253292	80292725	+	inside	3348	3098	NearestLocation	Pqlc1
chr16	67620168	67620667	500	*	6.53	6.25	6.76	-0.51	0.211	1	76	108.42	X00754	ENSMUSG00000064115	66655421	67620908	-	inside	490	241	NearestLocation	Cadm2
chr15	35302228	35303200	973	*	6.15	5.83	6.41	-0.58	0.211	1	57	85.19	X00748	ENSMUSG00000022330	35296098	35303304	+	inside	6616	104	NearestLocation	Osr2
chr1	134234426	134234925	500	*	5.98	5.64	6.26	-0.61	0.211	1	50	76.48	X00752	ENSMUSG00000042429	134199223	134235431	-	inside	755	506	NearestLocation	Adora1
chr19	46304802	46305301	500	*	5.98	5.64	6.26	-0.61	0.211	1	50	76.48	X00753	ENSMUSG00000025225	46304737	46312090	+	inside	315	65	NearestLocation	Nfkb2
chr17	33032864	33033363	500	*	5.7	5.32	6	-0.68	0.211	1	40	63.89	X00750	ENSMUSG00000067430	33016863	33033402	-	inside	288	39	NearestLocation	Zfp763
chr16	87597432	87597931	500	*	5.29	5.61	4.86	0.75	0.212	1	49	29.04	X00760	ENSMUSG00000064670	87621014	87621120	-	downstream	23438	23083	NearestLocation	NA
chr10	77969603	77970102	500	*	5.52	5.83	5.12	0.71	0.212	1	57	34.85	X00757	ENSMUSG00000009292	77907722	77970563	-	inside	711	461	NearestLocation	Trpm2
chr2	155073898	155074397	500	*	7.27	7.45	7.05	0.4	0.212	1	175	132.62	X00758	ENSMUSG00000027597	155059310	155074497	-	inside	349	100	NearestLocation	Ahcy
chr11	119913597	119914096	500	*	7.76	7.92	7.58	0.34	0.212	1	242	190.71	X00755	ENSMUSG00000025371	119913441	119919548	+	inside	405	156	NearestLocation	Chmp6
chr3	7366441	7366940	500	*	6.86	6.61	7.07	-0.46	0.212	1	98	134.56	X00756	ENSMUSG00000027499	7366669	7445366	+	overlapStart	21	228	NearestLocation	Pkia
chr6	128799011	128799930	920	*	6.73	6.48	6.95	-0.48	0.212	1	89	123.91	X00759	ENSMUSG00000030325	128778485	128789215	-	upstream	-10255	9796	NearestLocation	Klrb1c
chr11	35667297	35667796	500	*	5.05	5.39	4.6	0.8	0.213	1	42	24.2	X00767	ENSMUSG00000056427	35121224	35708507	+	inside	546322	40711	Overlapping	Slit3
chr11	35667297	35667796	500	*	5.05	5.39	4.6	0.8	0.213	1	42	24.2	X00767	ENSMUSG00000065583	35616816	35616925	+	downstream	50730	50372	NearestLocation	Mir218-2
chr2	160368799	160369298	500	*	5.05	5.39	4.6	0.8	0.213	1	42	24.2	X00768	ENSMUSG00000074622	160363703	160367065	-	upstream	-1983	1734	NearestLocation	Mafb
chr5	112851318	112851817	500	*	5.05	5.39	4.6	0.8	0.213	1	42	24.2	X00769	ENSMUSG00000072720	112688876	112896362	-	inside	44794	44545	NearestLocation	Myo18b
chr11	76398394	76398893	500	*	5.78	6.07	5.41	0.65	0.213	1	67	42.59	X00770	ENSMUSG00000020844	76257198	76399140	-	inside	496	247	NearestLocation	Nxn
chr18	4920556	4921055	500	*	5.78	6.07	5.41	0.65	0.213	1	67	42.59	X00771	ENSMUSG00000024236	4920540	5119299	+	inside	266	16	NearestLocation	Svil
chr5	110979103	110979602	500	*	6.45	6.69	6.16	0.52	0.213	1	103	71.64	X00761	ENSMUSG00000033209	110879803	111289780	+	inside	99549	99300	Overlapping	Ttc28
chr5	110979103	110979602	500	*	6.45	6.69	6.16	0.52	0.213	1	103	71.64	X00761	ENSMUSG00000076163	111004144	111004252	+	upstream	-24792	24542	NearestLocation	Mir701
chr15	11905021	11905520	500	*	6.55	6.78	6.28	0.51	0.213	1	110	77.45	X00764	ENSMUSG00000022206	11839896	11905674	-	inside	404	154	NearestLocation	Npr3
chr7	109703591	109704090	500	*	6.65	6.87	6.38	0.49	0.213	1	117	83.25	X00763	ENSMUSG00000031023	109703690	109712189	+	overlapStart	150	99	NearestLocation	Akip1
chr5	115158275	115158774	500	*	6.93	7.14	6.69	0.44	0.213	1	141	103.58	X00766	ENSMUSG00000048578	115142981	115158179	-	upstream	-345	96	NearestLocation	Mlec
chr4	129741948	129742447	500	*	7.11	7.3	6.88	0.42	0.213	1	158	118.1	X00762	ENSMUSG00000028790	129703164	129742303	-	overlapStart	105	144	NearestLocation	Khdrbs1
chr4	154898559	154899058	500	*	6.32	6.02	6.57	-0.55	0.213	1	65	94.87	X00765	ENSMUSG00000029059	154895504	154899135	-	inside	327	77	NearestLocation	Fam213b
chr18	22985037	22985536	500	*	5.65	5.95	5.28	0.68	0.214	1	62	38.72	X00775	ENSMUSG00000041923	22693181	23041653	-	inside	56367	56117	NearestLocation	Nol4
chr5	41844144	41844643	500	*	6.36	6.6	6.06	0.54	0.214	1	97	66.8	X00773	ENSMUSG00000061755	41787542	41844168	-	overlapStart	-226	24	NearestLocation	Bod1l
chr12	102468823	102469322	500	*	6.75	6.97	6.49	0.47	0.214	1	125	90.03	X00772	ENSMUSG00000021192	102469134	102497902	+	overlapStart	-62	188	NearestLocation	Golga5
chr14	73509696	73510195	500	*	7.5	7.67	7.3	0.37	0.214	1	204	157.79	X00776	ENSMUSG00000022109	73510049	73518545	+	overlapStart	-103	146	NearestLocation	Med4
chr5	28316804	28317303	500	*	7.57	7.74	7.38	0.36	0.214	1	214	166.51	X00779	ENSMUSG00000048271	28317121	28419244	+	overlapStart	-67	182	NearestLocation	Rbm33
chr10	11149099	11149598	500	*	7.91	8.06	7.73	0.33	0.214	1	267	212.97	X00777	ENSMUSG00000090112	11149427	11217595	+	overlapStart	-79	171	NearestLocation	Shprh
chr8	120178949	120179448	500	*	6.4	6.11	6.64	-0.53	0.214	1	69	99.71	X00774	ENSMUSG00000092329	119910841	124345722	+	inside	268357	268108	Overlapping	Galnt2
chr8	120178949	120179448	500	*	6.4	6.11	6.64	-0.53	0.214	1	69	99.71	X00774	ENSMUSG00000042269	120166397	120177466	-	upstream	-1732	1483	NearestLocation	Fam92b
chr10	13552863	13553362	500	*	6.17	5.86	6.43	-0.57	0.214	1	58	86.16	X00778	ENSMUSG00000019809	13523842	13553142	-	overlapStart	30	220	NearestLocation	Pex3
chr10	13552863	13553362	500	*	6.17	5.86	6.43	-0.57	0.214	1	58	86.16	X00778	ENSMUSG00000019808	13552894	13563376	+	overlapStart	218	31	NearestLocation	Adat2
chr11	6598823	6599322	500	*	5.24	4.81	5.57	-0.76	0.214	1	28	47.44	X00780	ENSMUSG00000041073	6597823	6606053	-	inside	6981	1000	NearestLocation	Nacad
chr17	57276699	57277198	500	*	5.24	4.81	5.57	-0.76	0.214	1	28	47.44	X00781	ENSMUSG00000034116	57279100	57328031	+	upstream	-2152	1902	NearestLocation	Vav1
chr3	17793361	17793860	500	*	5.24	4.81	5.57	-0.76	0.214	1	28	47.44	X00782	ENSMUSG00000100252	17789921	17808970	+	inside	3689	3440	Overlapping	2610100L16Rik
chr3	17793361	17793860	500	*	5.24	4.81	5.57	-0.76	0.214	1	28	47.44	X00782	ENSMUSG00000093073	17795662	17795770	+	upstream	-2052	1802	NearestLocation	Mir124a-2
chr3	54156015	54156514	500	*	5.24	4.81	5.57	-0.76	0.214	1	28	47.44	X00783	ENSMUSG00000027748	54156057	54318470	+	overlapStart	207	42	NearestLocation	Trpc4
chr5	25705550	25706049	500	*	5.91	6.19	5.57	0.62	0.215	1	73	47.44	X00788	ENSMUSG00000028933	25689812	25705825	-	overlapStart	25	224	NearestLocation	Xrcc2
chr17	74294635	74295134	500	*	6.04	6.3	5.71	0.6	0.215	1	79	52.28	X00790	ENSMUSG00000058704	74200706	74294883	-	overlapStart	-1	248	NearestLocation	Memo1
chr9	30942592	30943091	500	*	6.57	6.79	6.29	0.5	0.215	1	111	78.41	X00789	ENSMUSG00000031994	30942562	30963838	+	inside	280	30	NearestLocation	Adamts8
chr7	131553594	131554093	500	*	6.66	6.88	6.4	0.49	0.215	1	118	84.22	X00784	ENSMUSG00000030849	130162451	133123350	-	inside	1569506	1391143	Overlapping	Fgfr2
chr7	131553594	131554093	500	*	6.66	6.88	6.4	0.49	0.215	1	118	84.22	X00784	ENSMUSG00000050100	131548773	131556589	+	inside	5071	2496	NearestLocation	Hmx2
chr12	110695899	110696398	500	*	7.58	7.75	7.39	0.36	0.215	1	215	167.48	X00792	ENSMUSG00000021270	110690605	110702728	-	inside	6580	5294	NearestLocation	Hsp90aa1
chr5	138280174	138280673	500	*	7.68	7.49	7.84	-0.35	0.215	1	180	229.43	X00787	ENSMUSG00000036928	138280240	138312393	+	overlapStart	184	66	NearestLocation	Stag3
chr1	172206383	172206882	500	*	6.01	5.67	6.28	-0.6	0.215	1	51	77.45	X00791	ENSMUSG00000013698	172196728	172206804	-	overlapStart	172	78	NearestLocation	Pea15a
chr18	69198127	69198626	500	*	5.82	5.46	6.1	-0.64	0.215	1	44	68.73	X00785	ENSMUSG00000088166	69173987	69174120	-	upstream	-24256	24007	NearestLocation	NA
chr8	93811812	93812311	500	*	5.82	5.46	6.1	-0.64	0.215	1	44	68.73	X00786	ENSMUSG00000097520	93750147	93810292	-	upstream	-1770	1520	NearestLocation	NA
chr8	93811812	93812311	500	*	5.82	5.46	6.1	-0.64	0.215	1	44	68.73	X00786	ENSMUSG00000031748	93809966	93969388	+	inside	2096	1846	Overlapping	Gnao1
chr15	73423086	73423585	500	*	6.37	6.61	6.08	0.53	0.216	1	98	67.76	X00795	ENSMUSG00000022607	73205105	73423191	-	overlapStart	-145	105	NearestLocation	Ptk2
chr17	72604095	72604594	500	*	6.37	6.61	6.08	0.53	0.216	1	98	67.76	X00796	ENSMUSG00000055471	71869442	72603709	-	upstream	-635	386	NearestLocation	Alk
chr18	10725421	10725920	500	*	6.37	6.61	6.08	0.53	0.216	1	98	67.76	X00797	ENSMUSG00000024294	10725548	10818704	+	overlapStart	122	127	NearestLocation	Mib1
chr7	142060827	142061326	500	*	6.37	6.61	6.08	0.53	0.216	1	98	67.76	X00798	ENSMUSG00000025147	142008553	142061034	-	overlapStart	-42	207	NearestLocation	Mob2
chr11	54866216	54866715	500	*	7.05	7.25	6.82	0.42	0.216	1	152	113.26	X00799	ENSMUSG00000020267	54866383	54870501	+	overlapStart	83	167	NearestLocation	Hint1
chr17	26839337	26839836	500	*	7.05	7.25	6.82	0.42	0.216	1	152	113.26	X00800	ENSMUSG00000015579	26838664	26841565	-	inside	1979	673	NearestLocation	Nkx2-5
chrX	13071760	13072259	500	*	6.82	6.57	7.03	-0.46	0.216	1	95	130.69	X00794	ENSMUSG00000031010	13071498	13173328	+	inside	512	262	NearestLocation	Usp9x
chr11	17257369	17257868	500	*	6.34	6.04	6.58	-0.54	0.216	1	66	95.84	X00801	ENSMUSG00000000581	17257579	17269176	+	overlapStart	39	210	NearestLocation	C1d
chr14	45350868	45351367	500	*	5.73	5.36	6.02	-0.66	0.216	1	41	64.86	X00793	ENSMUSG00000053205	45351473	45373585	+	upstream	-355	106	NearestLocation	Styx
chr11	57829382	57829881	500	*	5.19	5.52	4.76	0.76	0.217	1	46	27.11	X00802	ENSMUSG00000037335	57828705	57832818	-	inside	3186	677	NearestLocation	Hand1
chr2	173585368	173585867	500	*	5.55	5.86	5.16	0.7	0.217	1	58	35.82	X00804	ENSMUSG00000027517	173568666	173578365	-	upstream	-7253	7003	NearestLocation	Ankrd60
chr2	173585368	173585867	500	*	5.55	5.86	5.16	0.7	0.217	1	58	35.82	X00804	ENSMUSG00000055897	173579320	173659640	-	inside	74022	6048	Overlapping	Ppp4r1l-ps
chr3	89319542	89320041	500	*	5.55	5.86	5.16	0.7	0.217	1	58	35.82	X00805	ENSMUSG00000028039	89313899	89322965	-	inside	3173	2924	NearestLocation	Efna3
chr4	123664232	123664731	500	*	5.55	5.86	5.16	0.7	0.217	1	58	35.82	X00806	ENSMUSG00000028649	123349633	123684360	-	inside	19878	19629	Overlapping	Macf1
chr4	123664232	123664731	500	*	5.55	5.86	5.16	0.7	0.217	1	58	35.82	X00806	ENSMUSG00000087307	123665881	123671217	+	upstream	-1399	1150	NearestLocation	NA
chr7	130645984	130646483	500	*	5.8	6.09	5.45	0.64	0.217	1	68	43.56	X00810	ENSMUSG00000030849	130162451	133123350	-	inside	2477116	483533	Overlapping	Fgfr2
chr7	130645984	130646483	500	*	5.8	6.09	5.45	0.64	0.217	1	68	43.56	X00810	ENSMUSG00000030852	130577484	130764784	+	inside	68750	68500	NearestLocation	Tacc2
chr9	75037442	75037941	500	*	6.17	6.43	5.86	0.57	0.217	1	86	58.08	X00814	ENSMUSG00000007656	75037614	75060313	+	overlapStart	78	172	NearestLocation	Arpp19
chr7	144943206	144943705	500	*	6.48	6.71	6.2	0.51	0.217	1	105	73.57	X00803	ENSMUSG00000070348	144929931	144939869	-	upstream	-3587	3337	NearestLocation	Ccnd1
chr3	121723426	121723925	500	*	6.58	6.81	6.31	0.5	0.217	1	112	79.38	X00807	ENSMUSG00000028128	121723537	121735052	+	overlapStart	139	111	NearestLocation	F3
chr11	46311705	46312204	500	*	6.95	6.71	7.15	-0.44	0.217	1	105	142.31	X00809	ENSMUSG00000020340	46193850	46312859	-	inside	905	655	NearestLocation	Cyfip2
chr19	50678235	50678734	500	*	6.56	6.29	6.79	-0.5	0.217	1	78	110.36	X00808	ENSMUSG00000043531	50143301	50678646	-	overlapStart	162	88	NearestLocation	Sorcs1
chr19	50678235	50678734	500	*	6.56	6.29	6.79	-0.5	0.217	1	78	110.36	X00808	ENSMUSG00000097446	50677406	50778662	+	inside	1078	829	Overlapping	NA
chr2	19371517	19372016	500	*	5.93	5.58	6.2	-0.62	0.217	1	48	73.57	X00811	ENSMUSG00000023094	19371440	19394976	+	inside	326	77	NearestLocation	Msrb2
chr7	7121191	7121690	500	*	5.93	5.58	6.2	-0.62	0.217	1	48	73.57	X00812	ENSMUSG00000062116	7114690	7121445	-	overlapStart	5	245	NearestLocation	Zfp954
chr1	124044260	124044759	500	*	5.45	5.04	5.76	-0.72	0.217	1	33	54.21	X00815	ENSMUSG00000036815	123321471	124045559	-	inside	1049	800	NearestLocation	Dpp10
chr17	26009415	26009914	500	*	5.45	5.04	5.76	-0.72	0.217	1	33	54.21	X00816	ENSMUSG00000097523	25985815	25988469	+	downstream	23849	20946	NearestLocation	1700022N22Rik
chr17	26009415	26009914	500	*	5.45	5.04	5.76	-0.72	0.217	1	33	54.21	X00816	ENSMUSG00000037098	25989036	26069409	-	inside	59745	20379	Overlapping	Rab11fip3
chr15	64922807	64923306	500	*	4.92	4.46	5.28	-0.82	0.217	1	22	38.72	X00813	ENSMUSG00000022376	64699042	64922296	-	upstream	-760	511	NearestLocation	Adcy8
chr15	64922807	64923306	500	*	4.92	4.46	5.28	-0.82	0.217	1	22	38.72	X00813	ENSMUSG00000094296	64817694	64937996	+	inside	105362	14690	Overlapping	NA
chr4	53440007	53440506	500	*	6.39	6.63	6.1	0.53	0.218	1	99	68.73	X00821	ENSMUSG00000028412	53440413	53622478	+	overlapStart	-157	93	NearestLocation	Slc44a1
chr19	6236001	6236500	500	*	6.88	7.09	6.64	0.45	0.218	1	136	99.71	X00820	ENSMUSG00000024777	6227765	6235872	-	upstream	-378	129	NearestLocation	Ppp2r5b
chr1	177982921	177983420	500	*	7.06	7.26	6.84	0.42	0.218	1	153	114.23	X00817	ENSMUSG00000091476	177983423	178172704	+	upstream	-253	3	NearestLocation	Gm16432
chr11	62457357	62457856	500	*	7.06	7.26	6.84	0.42	0.218	1	153	114.23	X00818	ENSMUSG00000018501	62316426	62458541	-	inside	935	685	Overlapping	Ncor1
chr11	62457357	62457856	500	*	7.06	7.26	6.84	0.42	0.218	1	153	114.23	X00818	ENSMUSG00000014245	62458460	62514417	+	upstream	-854	604	NearestLocation	Pigl
chr15	77928632	77929131	500	*	6.19	5.88	6.45	-0.56	0.218	1	59	87.13	X00819	ENSMUSG00000005354	77915047	77929006	-	overlapStart	124	125	NearestLocation	Txn2
chr13	54874407	54874906	500	*	5.32	5.64	4.91	0.74	0.219	1	50	30.01	X00823	ENSMUSG00000100728	54887470	54888013	+	upstream	-12814	12564	NearestLocation	NA
chr2	116075524	116076023	500	*	5.44	5.75	5.04	0.71	0.219	1	54	32.91	X00822	ENSMUSG00000086308	116067225	116085911	+	inside	8549	8299	Overlapping	NA
chr2	116075524	116076023	500	*	5.44	5.75	5.04	0.71	0.219	1	54	32.91	X00822	ENSMUSG00000103562	116075165	116076096	-	inside	322	73	NearestLocation	NA
chr2	117342268	117342767	500	*	6.29	6.54	6	0.54	0.219	1	93	63.89	X00828	ENSMUSG00000027347	117279993	117343001	-	inside	483	234	NearestLocation	Rasgrp1
chr4	59035014	59035513	500	*	6.29	6.54	6	0.54	0.219	1	93	63.89	X00829	ENSMUSG00000092345	59003210	59041888	+	inside	32054	6375	Overlapping	NA
chr4	59035014	59035513	500	*	6.29	6.54	6	0.54	0.219	1	93	63.89	X00829	ENSMUSG00000038607	59035088	59041903	+	overlapStart	176	74	NearestLocation	Gng10
chr4	99657198	99657697	500	*	6.5	6.73	6.22	0.51	0.219	1	106	74.54	X00825	ENSMUSG00000067261	99656299	99658622	+	inside	1149	899	Overlapping	Foxd3
chr4	99657198	99657697	500	*	6.5	6.73	6.22	0.51	0.219	1	106	74.54	X00825	ENSMUSG00000092763	99657742	99657830	+	upstream	-294	45	NearestLocation	NA
chr7	38061013	38061512	500	*	6.6	6.82	6.33	0.49	0.219	1	113	80.35	X00824	ENSMUSG00000030421	37960002	38019542	-	upstream	-41720	41471	NearestLocation	Uri1
chr19	41263755	41264254	500	*	6.89	7.1	6.65	0.44	0.219	1	137	100.68	X00830	ENSMUSG00000025016	41210842	41264004	-	overlapStart	0	249	NearestLocation	Tm9sf3
chr6	83506767	83507266	500	*	8.4	8.26	8.53	-0.27	0.219	1	306	369.8	X00831	ENSMUSG00000014554	83480217	83506969	-	overlapStart	-47	202	NearestLocation	Dguok
chr15	85811248	85811747	500	*	6.03	5.7	6.29	-0.59	0.219	1	52	78.41	X00826	ENSMUSG00000064284	85806972	85811697	-	overlapStart	199	50	NearestLocation	Cdpf1
chr11	98320819	98321318	500	*	4.8	4.32	5.16	-0.84	0.219	1	20	35.82	X00827	ENSMUSG00000038255	98325415	98329648	-	downstream	8580	4097	NearestLocation	Neurod2
chr10	121586591	121587090	500	*	6.19	6.44	5.88	0.56	0.22	1	87	59.05	X00836	ENSMUSG00000020115	121546455	121586794	-	overlapStart	-46	203	NearestLocation	Tbk1
chr2	32287872	32288371	500	*	6.41	6.64	6.12	0.52	0.22	1	100	69.7	X00841	ENSMUSG00000044627	32278816	32288075	-	overlapStart	-47	203	NearestLocation	Swi5
chr2	32287872	32288371	500	*	6.41	6.64	6.12	0.52	0.22	1	100	69.7	X00841	ENSMUSG00000002546	32287384	32307921	+	inside	738	488	Overlapping	Golga2
chr9	59036324	59036823	500	*	6.7	6.92	6.45	0.47	0.22	1	121	87.13	X00833	ENSMUSG00000032340	58874679	59036441	-	overlapStart	-133	117	NearestLocation	Neo1
chr8	40511407	40511906	500	*	6.99	7.19	6.76	0.43	0.22	1	146	108.42	X00834	ENSMUSG00000031601	40492540	40515847	-	inside	4191	3941	Overlapping	Cnot7
chr8	40511407	40511906	500	*	6.99	7.19	6.76	0.43	0.22	1	146	108.42	X00834	ENSMUSG00000031600	40511783	40551134	+	overlapStart	-127	123	NearestLocation	Vps37a
chr9	62343977	62344476	500	*	7.48	7.65	7.28	0.37	0.22	1	201	155.86	X00840	ENSMUSG00000032249	62341293	62378812	+	inside	2933	2684	NearestLocation	Anp32a
chr1	44119656	44120155	500	*	6.36	6.07	6.6	-0.53	0.22	1	67	96.81	X00832	ENSMUSG00000041684	44118957	44144770	+	inside	949	699	NearestLocation	Bivm
chr2	110017591	110018090	500	*	6.12	5.81	6.38	-0.57	0.22	1	56	83.25	X00837	ENSMUSG00000027160	110017817	110173360	+	overlapStart	23	226	NearestLocation	Ccdc34
chr11	102430681	102431180	500	*	5.75	5.39	6.04	-0.65	0.22	1	42	65.83	X00838	ENSMUSG00000034708	102430315	102437048	+	inside	615	366	NearestLocation	Grn
chr4	129276444	129276943	500	*	5.75	5.39	6.04	-0.65	0.22	1	42	65.83	X00839	ENSMUSG00000093163	129282865	129282946	-	downstream	6252	5922	NearestLocation	NA
chr16	4212889	4213388	500	*	5.56	5.17	5.86	-0.69	0.22	1	36	58.08	X00835	ENSMUSG00000022521	4081328	4213407	-	inside	269	19	NearestLocation	Crebbp
chr14	70078233	70078732	500	*	5.58	5.88	5.2	0.68	0.221	1	59	36.79	X00851	ENSMUSG00000033730	70077445	70080157	+	inside	1037	788	NearestLocation	Egr3
chr3	116327189	116327688	500	*	5.58	5.88	5.2	0.68	0.221	1	59	36.79	X00852	ENSMUSG00000068696	116249654	116253484	-	upstream	-73954	73705	NearestLocation	Gpr88
chr3	116327189	116327688	500	*	5.58	5.88	5.2	0.68	0.221	1	59	36.79	X00852	ENSMUSG00000033502	116272553	116424032	-	inside	96594	54636	Overlapping	Cdc14a
chr4	124659236	124659735	500	*	5.58	5.88	5.2	0.68	0.221	1	59	36.79	X00853	ENSMUSG00000098760	124528924	124657169	-	upstream	-2317	2067	NearestLocation	NA
chr4	124659236	124659735	500	*	5.58	5.88	5.2	0.68	0.221	1	59	36.79	X00853	ENSMUSG00000090125	124656807	124660655	+	inside	2679	920	Overlapping	Pou3f1
chr2	158379684	158380183	500	*	5.96	6.23	5.63	0.6	0.221	1	75	49.37	X00846	ENSMUSG00000044349	158375638	158386145	+	inside	4296	4046	Overlapping	Snhg11
chr2	158379684	158380183	500	*	5.96	6.23	5.63	0.6	0.221	1	75	49.37	X00846	ENSMUSG00000064585	158379534	158379666	+	downstream	400	18	NearestLocation	NA
chr7	45714928	45715427	500	*	5.96	6.23	5.63	0.6	0.221	1	75	49.37	X00847	ENSMUSG00000057342	45709467	45718002	-	inside	2824	2575	Overlapping	Sphk2
chr7	45714928	45715427	500	*	5.96	6.23	5.63	0.6	0.221	1	75	49.37	X00847	ENSMUSG00000059070	45715457	45720835	+	upstream	-279	30	NearestLocation	Rpl18
chr15	27466064	27466563	500	*	6.08	6.34	5.76	0.58	0.221	1	81	54.21	X00842	ENSMUSG00000022265	27466677	27594909	+	upstream	-363	114	NearestLocation	Ank
chr15	78119652	78120151	500	*	6.9	7.11	6.67	0.44	0.221	1	138	101.65	X00844	ENSMUSG00000019146	77991748	78120028	-	overlapStart	126	123	NearestLocation	Cacng2
chr15	78119652	78120151	500	*	6.9	7.11	6.67	0.44	0.221	1	138	101.65	X00844	ENSMUSG00000092375	78119706	78144142	+	overlapStart	196	54	NearestLocation	NA
chr8	94012043	94012542	500	*	6.9	7.11	6.67	0.44	0.221	1	138	101.65	X00845	ENSMUSG00000031751	93971588	94012663	-	inside	371	121	NearestLocation	Amfr
chr4	129672459	129672958	500	*	7.34	7.52	7.13	0.38	0.221	1	183	140.37	X00849	ENSMUSG00000003731	129643980	129672767	-	overlapStart	59	191	NearestLocation	Kpna6
chr2	117120568	117121067	500	*	7.49	7.66	7.29	0.37	0.221	1	202	156.83	X00850	ENSMUSG00000027351	117121374	117182279	+	upstream	-556	307	NearestLocation	Spred1
chr3	88621065	88621564	500	*	6.71	6.46	6.93	-0.47	0.221	1	88	121.98	X00843	ENSMUSG00000028059	88607454	88648052	+	inside	13860	13611	Overlapping	Arhgef2
chr3	88621065	88621564	500	*	6.71	6.46	6.93	-0.47	0.221	1	88	121.98	X00843	ENSMUSG00000093390	88616457	88621061	-	upstream	-253	4	NearestLocation	NA
chr9	88719411	88719910	500	*	4.18	3.58	4.6	-1.01	0.221	1	12	24.2	X00848	ENSMUSG00000079427	88688602	88720296	-	inside	636	386	Overlapping	Mthfsl
chr9	88719411	88719910	500	*	4.18	3.58	4.6	-1.01	0.221	1	12	24.2	X00848	ENSMUSG00000074149	88719629	88806264	+	overlapStart	31	218	NearestLocation	NA
chr16	24393539	24394038	500	*	6.31	6.55	6.02	0.54	0.222	1	94	64.86	X00854	ENSMUSG00000097867	24391612	24393588	-	overlapStart	-200	49	NearestLocation	NA
chr16	24393539	24394038	500	*	6.31	6.55	6.02	0.54	0.222	1	94	64.86	X00854	ENSMUSG00000033306	24393350	24992576	+	inside	438	189	Overlapping	Lpp
chr9	40800879	40801378	500	*	6.92	7.12	6.68	0.44	0.222	1	139	102.61	X00855	ENSMUSG00000015656	40800984	40805200	+	overlapStart	144	105	NearestLocation	Hspa8
chr7	127717018	127717517	500	*	6.1	6.36	5.79	0.57	0.223	1	82	55.18	X00865	ENSMUSG00000042340	127712736	127718185	+	inside	4532	668	NearestLocation	Ctf1
chrX	13846336	13846835	500	*	6.21	6.46	5.91	0.55	0.223	1	88	60.02	X00858	ENSMUSG00000031012	13517080	13851367	-	inside	4781	4532	NearestLocation	Cask
chr13	78203015	78203514	500	*	6.62	6.85	6.36	0.48	0.223	1	115	82.29	X00856	ENSMUSG00000069171	78188973	78199757	-	upstream	-3507	3258	NearestLocation	Nr2f1
chr13	78203015	78203514	500	*	6.62	6.85	6.36	0.48	0.223	1	115	82.29	X00856	ENSMUSG00000087143	78198017	78279391	+	inside	5247	4998	Overlapping	NA
chr6	71543986	71544485	500	*	6.62	6.85	6.36	0.48	0.223	1	115	82.29	X00857	ENSMUSG00000053119	71543797	71582609	+	inside	439	189	NearestLocation	Chmp3
chr2	69585672	69586171	500	*	6.73	6.94	6.48	0.47	0.223	1	123	89.06	X00862	ENSMUSG00000027070	69424340	69586065	-	overlapStart	143	106	NearestLocation	Lrp2
chr11	103028302	103028801	500	*	7.1	6.88	7.29	-0.41	0.223	1	118	156.83	X00867	ENSMUSG00000097410	102863337	103075903	+	inside	165215	47102	Overlapping	NA
chr11	103028302	103028801	500	*	7.1	6.88	7.29	-0.41	0.223	1	118	156.83	X00867	ENSMUSG00000020935	102994047	103028333	-	overlapStart	-219	31	NearestLocation	Dcakd
chr11	103028302	103028801	500	*	7.1	6.88	7.29	-0.41	0.223	1	118	156.83	X00867	ENSMUSG00000020936	103028190	103068912	+	inside	362	112	Overlapping	Nmt1
chr6	126739704	126740203	500	*	6.98	6.75	7.18	-0.43	0.223	1	108	145.21	X00864	ENSMUSG00000038077	126708329	126740674	-	inside	720	471	NearestLocation	Kcna6
chr6	126739704	126740203	500	*	6.98	6.75	7.18	-0.43	0.223	1	108	145.21	X00864	ENSMUSG00000097596	126718684	126741601	+	inside	21270	1398	Overlapping	NA
chr3	106684690	106685189	500	*	6.73	6.48	6.94	-0.47	0.223	1	89	122.94	X00863	ENSMUSG00000056260	106684987	106736577	+	overlapStart	-47	202	NearestLocation	Lrif1
chr7	116504126	116504625	500	*	6.45	6.17	6.68	-0.51	0.223	1	72	102.61	X00861	ENSMUSG00000030659	116504369	116540554	+	overlapStart	7	243	NearestLocation	Nucb2
chr6	99666419	99666918	500	*	6.05	5.73	6.31	-0.58	0.223	1	53	79.38	X00860	ENSMUSG00000030068	99257484	99666797	-	overlapStart	129	121	NearestLocation	NA
chr6	99666419	99666918	500	*	6.05	5.73	6.31	-0.58	0.223	1	53	79.38	X00860	ENSMUSG00000093661	99625135	99666771	-	overlapStart	103	147	NearestLocation	Eif4e3
chr5	120302203	120302702	500	*	5.27	4.86	5.6	-0.74	0.223	1	29	48.4	X00859	ENSMUSG00000080412	120287726	120287847	+	downstream	14726	14356	NearestLocation	NA
chr4	134159983	134160482	500	*	3.97	3.32	4.41	-1.09	0.223	1	10	21.3	X00866	ENSMUSG00000037443	134129858	134187112	-	inside	26880	26630	Overlapping	Cep85
chr4	134159983	134160482	500	*	3.97	3.32	4.41	-1.09	0.223	1	10	21.3	X00866	ENSMUSG00000098693	134167808	134167895	-	downstream	7663	7326	NearestLocation	NA
chr10	128668851	128669350	500	*	5.23	5.55	4.81	0.74	0.224	1	47	28.07	X00869	ENSMUSG00000049858	128669887	128673918	-	downstream	4818	537	NearestLocation	Suox
chr18	36122195	36122694	500	*	5.23	5.55	4.81	0.74	0.224	1	47	28.07	X00870	ENSMUSG00000060275	36017707	36197380	-	inside	74936	74686	NearestLocation	Nrg2
chr2	164953165	164953664	500	*	5.23	5.55	4.81	0.74	0.224	1	47	28.07	X00871	ENSMUSG00000017737	164940780	164955850	+	inside	12634	2186	Overlapping	Mmp9
chr2	164953165	164953664	500	*	5.23	5.55	4.81	0.74	0.224	1	47	28.07	X00871	ENSMUSG00000087503	164960802	164962752	+	upstream	-7388	7138	NearestLocation	NA
chr12	46399250	46399749	500	*	5.98	6.25	5.65	0.59	0.224	1	76	50.34	X00868	ENSMUSG00000064800	45984343	45984549	+	downstream	415157	414701	NearestLocation	NA
chr11	101095411	101095910	500	*	6.33	6.57	6.04	0.53	0.224	1	95	65.83	X00876	ENSMUSG00000019303	101091823	101095436	-	overlapStart	-224	25	NearestLocation	Psmc3ip
chr16	35363660	35364159	500	*	6.64	6.86	6.38	0.48	0.224	1	116	83.25	X00877	ENSMUSG00000034473	35311131	35363918	-	overlapStart	8	241	NearestLocation	Sec22a
chr19	24961462	24961961	500	*	6.64	6.86	6.38	0.48	0.224	1	116	83.25	X00878	ENSMUSG00000024878	24919916	24961616	-	overlapStart	-96	154	NearestLocation	Cbwd1
chr9	20952564	20953063	500	*	6.64	6.86	6.38	0.48	0.224	1	116	83.25	X00879	ENSMUSG00000004099	20907206	20959888	-	inside	7074	6825	NearestLocation	Dnmt1
chr10	60779556	60780055	500	*	5.48	5.09	5.79	-0.7	0.224	1	34	55.18	X00874	ENSMUSG00000020100	60712072	60752794	-	upstream	-27012	26762	NearestLocation	Slc29a3
chr10	60779556	60780055	500	*	5.48	5.09	5.79	-0.7	0.224	1	34	55.18	X00874	ENSMUSG00000020099	60762610	60831581	-	inside	51775	16946	Overlapping	Unc5b
chr17	17909883	17910382	500	*	5.48	5.09	5.79	-0.7	0.224	1	34	55.18	X00875	ENSMUSG00000079700	17887852	17971677	+	inside	22280	22031	Overlapping	Fpr3
chr17	17909883	17910382	500	*	5.48	5.09	5.79	-0.7	0.224	1	34	55.18	X00875	ENSMUSG00000090957	17911039	17911947	-	downstream	1815	657	NearestLocation	NA
chr11	58949899	58950398	500	*	5.18	4.75	5.51	-0.75	0.224	1	27	45.5	X00872	ENSMUSG00000056895	58948920	58949533	+	downstream	1228	366	NearestLocation	Hist3h2ba
chr15	75884024	75884523	500	*	5.18	4.75	5.51	-0.75	0.224	1	27	45.5	X00873	ENSMUSG00000098678	75884137	75888770	-	overlapEnd	4496	113	NearestLocation	Mroh6
chr10	109664663	109665162	500	*	4.82	5.17	4.35	0.82	0.225	1	36	20.33	X00880	ENSMUSG00000065802	109368088	109368193	-	upstream	-296719	296470	NearestLocation	NA
chr14	123513369	123513868	500	*	5.36	5.67	4.95	0.72	0.225	1	51	30.98	X00881	ENSMUSG00000000197	123276641	123627144	-	inside	113526	113276	NearestLocation	Nalcn
chr16	17891265	17891764	500	*	6.44	6.67	6.16	0.51	0.225	1	102	71.64	X00882	ENSMUSG00000092470	17835277	17891671	-	overlapStart	157	93	NearestLocation	NA
chr16	17891265	17891764	500	*	6.44	6.67	6.16	0.51	0.225	1	102	71.64	X00882	ENSMUSG00000003166	17839482	17894145	-	inside	2631	2381	Overlapping	Dgcr2
chr13	30973774	30974273	500	*	6.54	6.77	6.28	0.49	0.225	1	109	77.45	X00884	ENSMUSG00000021357	30813919	30974047	-	overlapStart	23	226	NearestLocation	Exoc2
chr13	30973774	30974273	500	*	6.54	6.77	6.28	0.49	0.225	1	109	77.45	X00884	ENSMUSG00000056257	30974204	30975976	+	overlapStart	-180	69	NearestLocation	NA
chr19	45079742	45080241	500	*	6.54	6.77	6.28	0.49	0.225	1	109	77.45	X00885	ENSMUSG00000025213	45075241	45079289	+	downstream	4751	453	NearestLocation	Kazald1
chr12	33429525	33430024	500	*	7.04	7.23	6.81	0.42	0.225	1	150	112.3	X00887	ENSMUSG00000020561	33429624	33439380	+	overlapStart	150	99	NearestLocation	Twistnb
chr6	22355782	22356281	500	*	7.29	7.47	7.08	0.39	0.225	1	177	135.53	X00883	ENSMUSG00000029672	22306520	22356243	-	overlapStart	211	38	NearestLocation	Fam3c
chr15	99725640	99726139	500	*	7.11	6.89	7.3	-0.41	0.225	1	119	157.79	X00888	ENSMUSG00000023020	99725618	99728136	+	inside	272	22	NearestLocation	Cox14
chrX	135839145	135839644	500	*	5.78	5.43	6.06	-0.64	0.225	1	43	66.8	X00886	ENSMUSG00000072966	135839034	135844730	+	inside	360	111	NearestLocation	Gprasp2
chr5	108461274	108461773	500	*	5.61	5.91	5.24	0.67	0.226	1	60	37.75	X00892	ENSMUSG00000033623	108461232	108506976	+	inside	292	42	NearestLocation	Pcgf3
chr1	165281816	165282315	500	*	6.12	6.38	5.81	0.56	0.226	1	83	56.15	X00894	ENSMUSG00000040836	165295789	165326745	+	upstream	-13723	13474	NearestLocation	Gpr161
chr5	115731007	115731506	500	*	6.35	6.58	6.06	0.52	0.226	1	96	66.8	X00899	ENSMUSG00000041609	115648175	115731621	-	inside	365	115	NearestLocation	Ccdc64
chr3	94582462	94582961	500	*	7.3	7.48	7.09	0.38	0.226	1	178	136.5	X00896	ENSMUSG00000028136	94497550	94582702	-	overlapStart	-10	240	NearestLocation	Snx27
chr9	20877888	20878387	500	*	7.3	7.48	7.09	0.38	0.226	1	178	136.5	X00897	ENSMUSG00000038742	20873809	20879727	-	inside	1589	1340	NearestLocation	Angptl6
chr7	121034353	121034852	500	*	6.81	6.57	7.02	-0.45	0.226	1	95	129.72	X00898	ENSMUSG00000053358	121033252	121035096	-	inside	494	244	Overlapping	NA
chr7	121034353	121034852	500	*	6.81	6.57	7.02	-0.45	0.226	1	95	129.72	X00898	ENSMUSG00000030876	121034445	121076834	+	overlapStart	157	92	NearestLocation	Mettl9
chr3	87525339	87525838	500	*	6.53	6.27	6.76	-0.49	0.226	1	77	108.42	X00890	ENSMUSG00000003382	87525407	87540156	+	overlapStart	181	68	NearestLocation	Etv3
chr13	85189237	85189736	500	*	6.39	6.11	6.63	-0.52	0.226	1	69	98.74	X00893	ENSMUSG00000021548	85189408	85223469	+	overlapStart	78	171	NearestLocation	Ccnh
chr14	98168119	98168618	500	*	6.31	6.02	6.55	-0.53	0.226	1	65	93.9	X00889	ENSMUSG00000055639	97786853	98169765	-	inside	1397	1147	NearestLocation	Dach1
chr18	37217958	37218457	500	*	5.69	5.32	5.98	-0.65	0.226	1	40	62.92	X00895	ENSMUSG00000103458	36952741	37840200	+	inside	265467	265217	Overlapping	Gm37013
chr18	37217958	37218457	500	*	5.69	5.32	5.98	-0.65	0.226	1	40	62.92	X00895	ENSMUSG00000102836	36969916	37833296	+	inside	248292	248042	Overlapping	NA
chr18	37217958	37218457	500	*	5.69	5.32	5.98	-0.65	0.226	1	40	62.92	X00895	ENSMUSG00000103125	36975941	37833296	+	inside	242267	242017	Overlapping	NA
chr18	37217958	37218457	500	*	5.69	5.32	5.98	-0.65	0.226	1	40	62.92	X00895	ENSMUSG00000097430	37159854	37178522	-	upstream	-39686	39436	NearestLocation	NA
chr16	90709778	90710277	500	*	5.59	5.21	5.88	-0.67	0.226	1	37	59.05	X00891	ENSMUSG00000022978	90719312	90727404	-	downstream	17376	9035	NearestLocation	Mis18a
chr2	122702123	122702622	500	*	6.46	6.69	6.18	0.5	0.227	1	103	72.6	X00905	ENSMUSG00000005802	122681233	122702663	-	inside	291	41	NearestLocation	Slc30a4
chr2	122702123	122702622	500	*	6.46	6.69	6.18	0.5	0.227	1	103	72.6	X00905	ENSMUSG00000087017	122702047	122721456	+	inside	325	76	Overlapping	NA
chr4	138504609	138505108	500	*	6.46	6.69	6.18	0.5	0.227	1	103	72.6	X00906	ENSMUSG00000046447	138454314	138460123	+	downstream	50544	44486	NearestLocation	Camk2n1
chr9	31030344	31030843	500	*	7.67	7.83	7.49	0.34	0.227	1	228	180.06	X00903	ENSMUSG00000047412	31030644	31075879	+	overlapStart	-50	199	NearestLocation	Zbtb44
chr3	88409835	88410334	500	*	8.13	7.97	8.27	-0.29	0.227	1	251	307.84	X00907	ENSMUSG00000028066	88394143	88410331	-	overlapStart	247	3	NearestLocation	Pmf1
chr15	76722439	76722938	500	*	7.23	7.02	7.41	-0.39	0.227	1	130	170.38	X00908	ENSMUSG00000033707	76715276	76723845	-	inside	1157	907	NearestLocation	C030006K11Rik;Lrrc24
chr5	37245717	37246216	500	*	6.68	6.43	6.9	-0.47	0.227	1	86	119.07	X00904	ENSMUSG00000029121	37242080	37292132	+	inside	3886	3637	NearestLocation	Crmp1
chr6	120822280	120822779	500	*	6.07	5.75	6.33	-0.57	0.227	1	54	80.35	X00900	ENSMUSG00000019210	120795245	120822685	-	overlapStart	155	94	NearestLocation	Atp6v1e1
chr11	88552889	88553388	500	*	4.97	4.52	5.31	-0.79	0.227	1	23	39.69	X00901	ENSMUSG00000069769	88339382	88718513	-	inside	165375	165125	Overlapping	Msi2
chr11	88552889	88553388	500	*	4.97	4.52	5.31	-0.79	0.227	1	23	39.69	X00901	ENSMUSG00000084411	88432986	88433514	-	upstream	-119624	119375	NearestLocation	NA
chr14	111677664	111678163	500	*	4.97	4.52	5.31	-0.79	0.227	1	23	39.69	X00902	ENSMUSG00000033214	111675115	111683134	+	inside	2799	2549	NearestLocation	Slitrk5
chr10	117792529	117793028	500	*	6.25	6.49	5.95	0.54	0.228	1	90	61.96	X00912	ENSMUSG00000052798	117750624	117792705	-	overlapStart	-73	176	NearestLocation	Nup107
chr7	109518917	109519416	500	*	8.83	8.94	8.71	0.23	0.228	1	492	420.14	X00911	ENSMUSG00000046364	109519147	109522367	+	overlapStart	19	230	NearestLocation	Rpl27a
chr12	113000254	113000753	500	*	8.84	8.95	8.72	0.23	0.228	1	494	422.08	X00913	ENSMUSG00000011158	112959862	113000621	-	overlapStart	117	132	NearestLocation	Brf1
chr12	113000254	113000753	500	*	8.84	8.95	8.72	0.23	0.228	1	494	422.08	X00913	ENSMUSG00000097100	112999964	113001926	+	inside	540	290	Overlapping	NA
chr18	34651300	34651799	500	*	6.25	5.95	6.49	-0.54	0.228	1	62	90.03	X00914	ENSMUSG00000024370	34630951	34651735	-	overlapStart	185	64	NearestLocation	Cdc23
chr11	96823491	96823990	500	*	5.4	5	5.71	-0.71	0.228	1	32	52.28	X00909	ENSMUSG00000038615	96817414	96829968	-	inside	6228	5978	NearestLocation	Nfe2l1
chr4	108879225	108879724	500	*	5.4	5	5.71	-0.71	0.228	1	32	52.28	X00910	ENSMUSG00000003411	108879063	108943324	+	inside	411	162	NearestLocation	Rab3b
chr6	108456070	108456569	500	*	5.51	5.81	5.12	0.68	0.229	1	56	34.85	X00918	ENSMUSG00000030102	108213118	108551109	+	inside	243202	94540	Overlapping	Itpr1
chr6	108456070	108456569	500	*	5.51	5.81	5.12	0.68	0.229	1	56	34.85	X00918	ENSMUSG00000098674	108456183	108456536	+	includeFeature	137	33	NearestLocation	NA
chr10	127380319	127380818	500	*	5.76	6.04	5.41	0.63	0.229	1	66	42.59	X00921	ENSMUSG00000025404	127380327	127499384	+	overlapStart	241	8	NearestLocation	R3hdm2
chr16	91464675	91465174	500	*	5.76	6.04	5.41	0.63	0.229	1	66	42.59	X00922	ENSMUSG00000084866	91465104	91470121	+	overlapStart	-180	70	NearestLocation	A930006K02Rik
chr1	34842859	34843358	500	*	6.14	6.39	5.84	0.56	0.229	1	84	57.12	X00916	ENSMUSG00000037503	34813219	34843065	-	overlapStart	-43	206	NearestLocation	Fam168b
chr14	31018873	31019372	500	*	6.87	7.08	6.64	0.44	0.229	1	135	99.71	X00917	ENSMUSG00000042354	31012434	31019089	-	overlapStart	-33	216	NearestLocation	Gnl3
chr14	31018873	31019372	500	*	6.87	7.08	6.64	0.44	0.229	1	135	99.71	X00917	ENSMUSG00000042323	31019138	31121592	+	overlapStart	-16	234	NearestLocation	Pbrm1
chr4	62360265	62360764	500	*	6.55	6.29	6.77	-0.49	0.229	1	78	109.39	X00915	ENSMUSG00000066151	62300342	62360548	-	overlapStart	34	216	NearestLocation	Fkbp15
chr4	62360265	62360764	500	*	6.55	6.29	6.77	-0.49	0.229	1	78	109.39	X00915	ENSMUSG00000066150	62360727	62391769	+	overlapStart	-213	37	NearestLocation	Slc31a1
chr14	60771001	60771500	500	*	6.48	6.21	6.71	-0.5	0.229	1	74	104.55	X00919	ENSMUSG00000071347	60768134	60780869	+	inside	3116	2867	NearestLocation	C1qtnf9
chr4	109000477	109000976	500	*	6.41	6.13	6.64	-0.51	0.229	1	70	99.71	X00920	ENSMUSG00000053510	109000655	109061777	+	overlapStart	71	178	NearestLocation	Nrd1
chr6	92481124	92481623	500	*	5.99	5.67	6.26	-0.58	0.229	1	51	76.48	X00923	ENSMUSG00000030020	92370892	92706145	-	inside	224771	110232	Overlapping	Prickle2
chr6	92481124	92481623	500	*	5.99	5.67	6.26	-0.58	0.229	1	51	76.48	X00923	ENSMUSG00000098130	92561777	92562773	+	upstream	-80403	80154	NearestLocation	NA
chr8	95080913	95081412	500	*	5.99	5.67	6.26	-0.58	0.229	1	51	76.48	X00924	ENSMUSG00000031787	95081201	95099874	+	overlapStart	-39	211	NearestLocation	Katnb1
chr11	69981097	69981596	500	*	5.64	5.93	5.28	0.66	0.23	1	61	38.72	X00929	ENSMUSG00000018565	69968222	69982517	-	inside	1171	921	Overlapping	Elp5
chr11	69981097	69981596	500	*	5.64	5.93	5.28	0.66	0.23	1	61	38.72	X00929	ENSMUSG00000018559	69981156	69990601	+	overlapStart	190	59	NearestLocation	Ctdnep1
chr17	84626200	84626699	500	*	5.9	6.17	5.57	0.6	0.23	1	72	47.44	X00927	ENSMUSG00000024253	84626496	84655558	+	overlapStart	-46	203	NearestLocation	Dync2li1
chr4	53195965	53196464	500	*	5.9	6.17	5.57	0.6	0.23	1	72	47.44	X00928	ENSMUSG00000087192	53205066	53217857	-	downstream	21643	8602	NearestLocation	NA
chr11	98937554	98938053	500	*	6.03	6.29	5.71	0.58	0.23	1	78	52.28	X00925	ENSMUSG00000037992	98927818	98974942	+	inside	9986	9736	Overlapping	Rara
chr11	98937554	98938053	500	*	6.03	6.29	5.71	0.58	0.23	1	78	52.28	X00925	ENSMUSG00000064491	98946444	98946550	+	upstream	-8640	8391	NearestLocation	NA
chr17	35241497	35241996	500	*	7.08	7.27	6.86	0.41	0.23	1	154	116.17	X00931	ENSMUSG00000019432	35241746	35253707	+	overlapStart	0	249	NearestLocation	Ddx39b
chr15	39006079	39006578	500	*	6.77	6.52	6.98	-0.45	0.23	1	92	125.85	X00936	ENSMUSG00000097875	38726869	39006185	-	overlapStart	-143	106	NearestLocation	NA
chr15	39006079	39006578	500	*	6.77	6.52	6.98	-0.45	0.23	1	92	125.85	X00936	ENSMUSG00000022297	39006280	39038186	+	overlapStart	48	201	NearestLocation	Fzd6
chr7	29853404	29853903	500	*	6.09	5.78	6.35	-0.56	0.23	1	55	81.32	X00930	ENSMUSG00000050855	29833620	29853669	-	overlapStart	15	234	NearestLocation	Zfp940
chr7	29853404	29853903	500	*	6.09	5.78	6.35	-0.56	0.23	1	55	81.32	X00930	ENSMUSG00000097809	29853085	29859025	+	inside	569	319	Overlapping	NA
chr7	96797135	96797634	500	*	5.8	5.46	6.08	-0.62	0.23	1	44	67.76	X00926	ENSMUSG00000048078	96171244	96911093	+	inside	626140	113459	Overlapping	Tenm4
chr7	96797135	96797634	500	*	5.8	5.46	6.08	-0.62	0.23	1	44	67.76	X00926	ENSMUSG00000053049	96791433	96801549	-	inside	4165	3915	NearestLocation	Gm15413
chr13	23620595	23621094	500	*	5.51	5.13	5.81	-0.68	0.23	1	35	56.15	X00932	ENSMUSG00000047246	23583742	23621124	-	inside	280	30	Overlapping	Hist1h2be
chr13	23620595	23621094	500	*	5.51	5.13	5.81	-0.68	0.23	1	35	56.15	X00932	ENSMUSG00000080741	23620730	23621049	-	includeFeature	205	45	NearestLocation	NA
chr14	122481183	122481682	500	*	5.51	5.13	5.81	-0.68	0.23	1	35	56.15	X00933	ENSMUSG00000061524	122475435	122479852	+	downstream	5997	1331	NearestLocation	Zic2
chr18	65149533	65150032	500	*	5.51	5.13	5.81	-0.68	0.23	1	35	56.15	X00934	ENSMUSG00000024589	64887756	65217826	+	inside	262026	67794	Overlapping	Nedd4l
chr18	65149533	65150032	500	*	5.51	5.13	5.81	-0.68	0.23	1	35	56.15	X00934	ENSMUSG00000065402	65248861	65248926	+	upstream	-99079	98829	NearestLocation	Mir122
chr5	125245484	125245983	500	*	5.51	5.13	5.81	-0.68	0.23	1	35	56.15	X00935	ENSMUSG00000029478	125017153	125179219	-	upstream	-66515	66265	NearestLocation	Ncor2
chr12	83632557	83633056	500	*	5.27	5.58	4.86	0.72	0.231	1	48	29.04	X00939	ENSMUSG00000010608	83631236	83683123	+	inside	1570	1321	Overlapping	Rbm25
chr12	83632557	83633056	500	*	5.27	5.58	4.86	0.72	0.231	1	48	29.04	X00939	ENSMUSG00000099708	83631834	83633833	-	inside	1027	723	NearestLocation	NA
chr19	10389347	10389846	500	*	5.27	5.58	4.86	0.72	0.231	1	48	29.04	X00940	ENSMUSG00000024743	10389090	10453181	+	inside	506	257	NearestLocation	Syt7
chr19	10389347	10389846	500	*	5.27	5.58	4.86	0.72	0.231	1	48	29.04	X00940	ENSMUSG00000097862	10389130	10391735	-	inside	2139	217	Overlapping	NA
chr5	134687968	134688467	500	*	5.27	5.58	4.86	0.72	0.231	1	48	29.04	X00941	ENSMUSG00000029674	134656039	134688590	-	inside	372	123	NearestLocation	Limk1
chr7	99537272	99537771	500	*	5.27	5.58	4.86	0.72	0.231	1	48	29.04	X00942	ENSMUSG00000018909	99535466	99606771	+	inside	2056	1806	NearestLocation	Arrb1
chr2	118746083	118746582	500	*	6.16	6.41	5.86	0.55	0.231	1	85	58.08	X00951	ENSMUSG00000074918	118745758	118748810	+	inside	574	325	NearestLocation	NA
chr11	116306470	116306969	500	*	6.49	6.71	6.22	0.49	0.231	1	105	74.54	X00949	ENSMUSG00000020792	116288001	116307233	-	inside	513	264	Overlapping	Exoc7
chr11	116306470	116306969	500	*	6.49	6.71	6.22	0.49	0.231	1	105	74.54	X00949	ENSMUSG00000097117	116306864	116309510	+	overlapStart	-144	105	NearestLocation	Gm26730
chr17	46383327	46383826	500	*	6.59	6.81	6.33	0.48	0.231	1	112	80.35	X00944	ENSMUSG00000015597	46383731	46420920	+	overlapStart	-155	95	NearestLocation	Zfp318
chr9	53974662	53975161	500	*	6.59	6.81	6.33	0.48	0.231	1	112	80.35	X00945	ENSMUSG00000041986	53911460	53975301	-	inside	389	140	NearestLocation	Elmod1
chr1	177441774	177442273	500	*	6.69	6.91	6.45	0.46	0.231	1	120	87.13	X00952	ENSMUSG00000097892	177428338	177443270	-	inside	1246	997	Overlapping	NA
chr1	177441774	177442273	500	*	6.69	6.91	6.45	0.46	0.231	1	120	87.13	X00952	ENSMUSG00000063659	177442351	177450764	+	upstream	-327	78	NearestLocation	Zbtb18
chr9	57645422	57645921	500	*	6.69	6.91	6.45	0.46	0.231	1	120	87.13	X00953	ENSMUSG00000032312	57626647	57645653	-	overlapStart	-19	231	NearestLocation	Csk
chr14	26637845	26638344	500	*	7.17	7.36	6.96	0.39	0.231	1	164	124.88	X00950	ENSMUSG00000090861	26628407	26638183	-	overlapStart	89	161	NearestLocation	NA
chr14	26637845	26638344	500	*	7.17	7.36	6.96	0.39	0.231	1	164	124.88	X00950	ENSMUSG00000021877	26638074	26665084	+	overlapStart	20	229	NearestLocation	Arf4
chr15	79687374	79687873	500	*	7.26	7.43	7.05	0.38	0.231	1	173	132.62	X00947	ENSMUSG00000022426	79674250	79687872	-	overlapStart	248	1	NearestLocation	Gm10651;Josd1
chr15	76069548	76070047	500	*	7.78	7.93	7.6	0.33	0.231	1	244	194.58	X00943	ENSMUSG00000022568	76047158	76069784	-	overlapStart	-14	236	NearestLocation	Scrib
chr13	105054137	105054636	500	*	7.14	6.93	7.33	-0.4	0.231	1	122	160.7	X00948	ENSMUSG00000021719	104947153	105054930	-	inside	544	294	NearestLocation	Rgs7bp
chr7	4923734	4924233	500	*	6.63	6.38	6.85	-0.47	0.231	1	83	115.2	X00938	ENSMUSG00000035285	4922251	4925006	+	inside	1733	773	NearestLocation	Nat14
chr6	51612429	51612928	500	*	6.56	6.3	6.79	-0.48	0.231	1	79	110.36	X00955	ENSMUSG00000094528	51621632	51621708	+	upstream	-8954	8704	NearestLocation	NA
chr7	135735590	135736089	500	*	6.56	6.3	6.79	-0.48	0.231	1	79	110.36	X00956	ENSMUSG00000031004	135689788	135716379	-	upstream	-19461	19211	NearestLocation	Mki67
chr5	142822985	142823484	500	*	5.62	5.25	5.91	-0.66	0.231	1	38	60.02	X00954	ENSMUSG00000039477	142750380	142817662	-	upstream	-5572	5323	NearestLocation	Tnrc18
chr19	55061299	55061798	500	*	5.31	4.91	5.63	-0.72	0.231	1	30	49.37	X00937	ENSMUSG00000024978	55069734	55099451	-	downstream	37903	7936	NearestLocation	Gpam
chr17	47922943	47923442	500	*	4.72	4.25	5.08	-0.83	0.231	1	19	33.88	X00946	ENSMUSG00000023991	47867133	47924645	-	inside	1453	1203	Overlapping	Foxp4
chr17	47922943	47923442	500	*	4.72	4.25	5.08	-0.83	0.231	1	19	33.88	X00946	ENSMUSG00000085932	47922378	47923429	+	overlapEnd	814	13	NearestLocation	NA
chr10	79780315	79780814	500	*	6.05	6.3	5.73	0.57	0.232	1	79	53.24	X00967	ENSMUSG00000020325	79777272	79782630	+	inside	3292	1816	NearestLocation	Fstl3
chr12	69184218	69184717	500	*	7	7.19	6.77	0.42	0.232	1	146	109.39	X00958	ENSMUSG00000043998	69184157	69186770	+	inside	311	61	NearestLocation	Mgat2
chr2	166995966	166996465	500	*	7.42	7.59	7.23	0.36	0.232	1	193	150.05	X00964	ENSMUSG00000039536	166947549	166996299	-	overlapStart	83	166	NearestLocation	Stau1
chr8	120668020	120668519	500	*	7.57	7.73	7.39	0.35	0.232	1	213	167.48	X00963	ENSMUSG00000092329	119910841	124345722	+	inside	757429	757179	Overlapping	Galnt2
chr8	120668020	120668519	500	*	7.57	7.73	7.39	0.35	0.232	1	213	167.48	X00963	ENSMUSG00000097919	120608786	120668079	-	overlapStart	-191	59	NearestLocation	Emc8-1190005i06rik
chr8	120668020	120668519	500	*	7.57	7.73	7.39	0.35	0.232	1	213	167.48	X00963	ENSMUSG00000031819	120653914	120668573	-	inside	303	54	Overlapping	Emc8
chr8	120668020	120668519	500	*	7.57	7.73	7.39	0.35	0.232	1	213	167.48	X00963	ENSMUSG00000031818	120668222	120674207	+	overlapStart	48	202	NearestLocation	Cox4i1
chr8	22192554	22193053	500	*	7.86	8.01	7.69	0.32	0.232	1	257	206.2	X00957	ENSMUSG00000031479	22192809	22220843	+	overlapStart	-5	244	NearestLocation	Vps36
chr16	94125183	94126124	942	*	6.5	6.23	6.72	-0.49	0.232	1	75	105.52	X00962	ENSMUSG00000062713	94085260	94127032	+	inside	40394	908	NearestLocation	Sim2
chr5	24452885	24453384	500	*	6.42	6.15	6.65	-0.5	0.232	1	71	100.68	X00966	ENSMUSG00000023353	24452177	24502047	+	inside	957	708	NearestLocation	Agap3
chr13	55444804	55445303	500	*	6.35	6.07	6.58	-0.52	0.232	1	67	95.84	X00965	ENSMUSG00000074886	55445334	55460925	+	upstream	-280	31	NearestLocation	Grk6
chr13	23562106	23562605	500	*	5.91	5.58	6.18	-0.6	0.232	1	48	72.6	X00959	ENSMUSG00000069273	23561534	23562369	-	overlapStart	13	236	NearestLocation	Hist1h3e
chr2	37430642	37431141	500	*	5.91	5.58	6.18	-0.6	0.232	1	48	72.6	X00960	ENSMUSG00000075376	37370069	37422903	-	upstream	-7989	7739	NearestLocation	Rc3h2
chr2	37430642	37431141	500	*	5.91	5.58	6.18	-0.6	0.232	1	48	72.6	X00960	ENSMUSG00000066798	37425500	37443171	-	inside	12279	5142	Overlapping	Zbtb6
chr7	64373766	64374265	500	*	5.91	5.58	6.18	-0.6	0.232	1	48	72.6	X00961	ENSMUSG00000033458	64346758	64374095	-	overlapStart	79	170	NearestLocation	Fan1
chr4	127216238	127216737	500	*	4.87	5.21	4.41	0.8	0.233	1	37	21.3	X00973	ENSMUSG00000042388	127169204	127237022	+	inside	47284	20285	Overlapping	Dlgap3
chr4	127216238	127216737	500	*	4.87	5.21	4.41	0.8	0.233	1	37	21.3	X00973	ENSMUSG00000042380	127243784	127247809	+	upstream	-27296	27047	NearestLocation	Smim12
chr13	112289292	112289791	500	*	5.79	6.07	5.45	0.62	0.233	1	67	43.56	X00972	ENSMUSG00000049985	112288451	112384002	+	inside	1091	841	NearestLocation	Ankrd55
chr16	32078798	32079297	500	*	5.92	6.19	5.6	0.59	0.233	1	73	48.4	X00974	ENSMUSG00000022781	32016290	32079342	-	inside	294	45	NearestLocation	Pak2
chr3	129218155	129218654	500	*	6.81	7.01	6.57	0.44	0.233	1	129	94.87	X00971	ENSMUSG00000028023	129199878	129219591	+	inside	18526	937	Overlapping	Pitx2
chr3	129218155	129218654	500	*	6.81	7.01	6.57	0.44	0.233	1	129	94.87	X00971	ENSMUSG00000098515	129210006	129211500	+	downstream	8398	6655	NearestLocation	NA
chr2	25272242	25272741	500	*	7.18	7.37	6.98	0.39	0.233	1	165	125.85	X00968	ENSMUSG00000026966	25271039	25272438	-	overlapStart	-54	196	NearestLocation	Ssna1
chr2	25272242	25272741	500	*	7.18	7.37	6.98	0.39	0.233	1	165	125.85	X00968	ENSMUSG00000026965	25272478	25285915	+	overlapStart	14	236	NearestLocation	Anapc2
chr6	125081790	125082289	500	*	6.85	6.61	7.05	-0.44	0.233	1	98	132.62	X00976	ENSMUSG00000067714	125067920	125082472	+	inside	14120	183	Overlapping	Lpar5
chr6	125081790	125082289	500	*	6.85	6.61	7.05	-0.44	0.233	1	98	132.62	X00976	ENSMUSG00000063870	125095981	125130591	+	upstream	-13941	13692	NearestLocation	Chd4
chr6	35252528	35253027	500	*	6.02	5.7	6.28	-0.57	0.233	1	52	77.45	X00975	ENSMUSG00000073155	35252654	35263496	+	overlapStart	124	126	NearestLocation	1810058I24Rik
chr11	77348091	77348590	500	*	5.22	4.81	5.54	-0.73	0.233	1	28	46.47	X00969	ENSMUSG00000037926	77216287	77460220	+	inside	132053	111630	Overlapping	Ssh2
chr11	77348091	77348590	500	*	5.22	4.81	5.54	-0.73	0.233	1	28	46.47	X00969	ENSMUSG00000083899	77293444	77295898	+	downstream	54896	52193	NearestLocation	NA
chrX	161908239	161908738	500	*	5.22	4.81	5.54	-0.73	0.233	1	28	46.47	X00970	ENSMUSG00000059493	161833296	162159730	-	inside	251242	74943	Overlapping	Nhs
chrX	161908239	161908738	500	*	5.22	4.81	5.54	-0.73	0.233	1	28	46.47	X00970	ENSMUSG00000087571	161908223	161908777	+	inside	265	16	NearestLocation	NA
chr12	111668347	111668846	500	*	5.54	5.83	5.16	0.67	0.234	1	57	35.82	X00981	ENSMUSG00000001270	111669355	111672338	-	downstream	3742	509	NearestLocation	Ckb
chr3	141465996	141466495	500	*	5.54	5.83	5.16	0.67	0.234	1	57	35.82	X00982	ENSMUSG00000059921	141465564	141834924	+	inside	682	432	NearestLocation	Unc5c
chr2	126675270	126675769	500	*	7.19	7.38	6.99	0.39	0.234	1	166	126.82	X00978	ENSMUSG00000027361	126627442	126676337	-	inside	817	568	Overlapping	Gabpb1
chr2	126675270	126675769	500	*	7.19	7.38	6.99	0.39	0.234	1	166	126.82	X00978	ENSMUSG00000098024	126675916	126683805	+	upstream	-396	147	NearestLocation	NA
chr15	98762995	98763494	500	*	9.45	9.53	9.36	0.17	0.234	1	740	656.35	X00977	ENSMUSG00000051853	98737621	98763214	-	overlapStart	-30	219	NearestLocation	Arf3
chr12	36381530	36382029	500	*	7.37	7.17	7.54	-0.37	0.234	1	144	185.87	X00979	ENSMUSG00000091007	36381242	36382181	-	inside	401	152	Overlapping	NA
chr12	36381530	36382029	500	*	7.37	7.17	7.54	-0.37	0.234	1	144	185.87	X00979	ENSMUSG00000043153	36381519	36689444	+	inside	261	11	NearestLocation	Ispd
chr9	48495115	48495614	500	*	7.32	7.12	7.49	-0.37	0.234	1	139	180.06	X00983	ENSMUSG00000042396	48488709	48495330	-	overlapStart	-34	215	NearestLocation	Rbm7
chr9	48495115	48495614	500	*	7.32	7.12	7.49	-0.37	0.234	1	139	180.06	X00983	ENSMUSG00000042293	48495345	48495964	+	overlapStart	19	230	NearestLocation	Gm5617
chr11	53351520	53352019	500	*	5.12	4.7	5.45	-0.74	0.234	1	26	43.56	X00980	ENSMUSG00000049470	53350833	53421830	+	inside	937	687	NearestLocation	Aff4
chr17	49468205	49468704	500	*	6.07	6.32	5.76	0.56	0.235	1	80	54.21	X00987	ENSMUSG00000092268	49427938	49429240	-	upstream	-39214	38965	NearestLocation	NA
chr17	49468205	49468704	500	*	6.07	6.32	5.76	0.56	0.235	1	80	54.21	X00987	ENSMUSG00000040260	49456022	49564337	-	inside	95883	12183	Overlapping	Daam2
chr9	118486672	118487171	500	*	6.07	6.32	5.76	0.56	0.235	1	80	54.21	X00988	ENSMUSG00000032446	118478212	118486132	+	downstream	8710	540	NearestLocation	Eomes
chr15	76511690	76512189	500	*	7.88	8.03	7.71	0.31	0.235	1	261	210.07	X00986	ENSMUSG00000022555	76502015	76511951	-	overlapStart	11	238	NearestLocation	Dgat1
chr15	86214117	86214616	500	*	6.44	6.17	6.67	-0.5	0.235	1	72	101.65	X00989	ENSMUSG00000051864	86214459	86498503	+	overlapStart	-93	157	NearestLocation	Tbc1d22a
chr17	23829115	23829614	500	*	5.43	5.04	5.73	-0.69	0.235	1	33	53.24	X00984	ENSMUSG00000055839	23824740	23829109	-	upstream	-255	6	NearestLocation	Tceb2
chr8	105276184	105276683	500	*	5.43	5.04	5.73	-0.69	0.235	1	33	53.24	X00985	ENSMUSG00000014776	105276447	105281939	+	overlapStart	-13	236	NearestLocation	Nol3
chr11	97041453	97041952	500	*	5.17	5.49	4.76	0.73	0.236	1	45	27.11	X00995	ENSMUSG00000001445	97041560	97049213	+	overlapStart	142	107	NearestLocation	Mrpl10
chr8	18953905	18954404	500	*	5.17	5.49	4.76	0.73	0.236	1	45	27.11	X00996	ENSMUSG00000039814	18932729	18950975	-	upstream	-3179	2930	NearestLocation	Xkr5
chr8	22858727	22859226	500	*	5.17	5.49	4.76	0.73	0.236	1	45	27.11	X00997	ENSMUSG00000031540	22859535	22943259	+	upstream	-559	309	NearestLocation	Kat6a
chr12	112929866	112930365	500	*	5.42	5.73	5.04	0.69	0.236	1	53	32.91	X01002	ENSMUSG00000002799	112908590	112929495	-	upstream	-621	371	NearestLocation	Jag2
chr8	10249164	10249663	500	*	5.81	6.09	5.48	0.61	0.236	1	68	44.53	X01001	ENSMUSG00000039057	10272572	10634741	+	upstream	-23158	22909	NearestLocation	Myo16
chr5	65391258	65391757	500	*	6.52	6.74	6.26	0.48	0.236	1	107	76.48	X00990	ENSMUSG00000047215	65388364	65391443	-	overlapStart	-65	185	NearestLocation	Rpl9
chr5	65391258	65391757	500	*	6.52	6.74	6.26	0.48	0.236	1	107	76.48	X00990	ENSMUSG00000029199	65391497	65410693	+	overlapStart	11	239	NearestLocation	Lias
chr9	44604146	44604645	500	*	7.21	7.39	7.01	0.38	0.236	1	168	128.75	X01000	ENSMUSG00000032097	44604892	44640731	+	upstream	-496	247	NearestLocation	Ddx6
chr15	100494858	100495357	500	*	7.29	7.47	7.09	0.37	0.236	1	177	136.5	X00991	ENSMUSG00000044636	100479570	100495239	-	overlapStart	131	118	NearestLocation	Csrnp2
chr15	102670686	102671185	500	*	7.38	7.55	7.18	0.36	0.236	1	187	145.21	X00999	ENSMUSG00000062683	102662864	102672352	-	inside	1416	1167	Overlapping	Atp5g2
chr15	102670686	102671185	500	*	7.38	7.55	7.18	0.36	0.236	1	187	145.21	X00999	ENSMUSG00000076009	102671792	102671866	-	downstream	930	607	NearestLocation	Mir688
chr19	6276384	6276883	500	*	8.1	8.24	7.95	0.29	0.236	1	302	246.86	X00992	ENSMUSG00000085196	6268795	6276605	-	overlapStart	-29	221	NearestLocation	LOC105246847
chr19	6276384	6276883	500	*	8.1	8.24	7.95	0.29	0.236	1	302	246.86	X00992	ENSMUSG00000024772	6276725	6300096	+	overlapStart	-91	158	NearestLocation	Ehd1
chr6	47650959	47651780	822	*	6.66	6.41	6.87	-0.46	0.236	1	85	117.14	X00993	ENSMUSG00000087897	47637143	47637219	+	downstream	14227	13740	NearestLocation	NA
chr12	25092211	25092710	500	*	5.74	5.39	6.02	-0.63	0.236	1	42	64.86	X00998	ENSMUSG00000020644	25093801	25096092	-	downstream	3632	1091	NearestLocation	Id2
chr8	34371696	34372195	500	*	5.01	4.58	5.35	-0.76	0.236	1	24	40.66	X00994	ENSMUSG00000100435	34359950	34381248	+	inside	11996	9053	NearestLocation	NA
chr11	69757922	69758421	500	*	5.3	5.61	4.91	0.71	0.237	1	49	30.01	X01010	ENSMUSG00000005198	69733997	69758637	-	inside	465	216	NearestLocation	Polr2a
chr3	55111900	55112399	500	*	6.84	7.04	6.61	0.43	0.237	1	132	97.77	X01009	ENSMUSG00000036580	55112108	55137322	+	overlapStart	42	208	NearestLocation	Spg20
chr7	44374080	44374579	500	*	7.13	7.31	6.92	0.39	0.237	1	159	121.01	X01004	ENSMUSG00000008028	44360043	44385820	-	inside	11490	11241	Overlapping	1700008O03Rik
chr7	44374080	44374579	500	*	7.13	7.31	6.92	0.39	0.237	1	159	121.01	X01004	ENSMUSG00000030731	44384102	44400187	+	upstream	-9772	9523	NearestLocation	Syt3
chr8	11555728	11556227	500	*	7.22	7.4	7.02	0.38	0.237	1	169	129.72	X01011	ENSMUSG00000045969	11556066	11563250	+	overlapStart	-88	161	NearestLocation	Ing1
chr11	107547243	107547742	500	*	6.04	5.73	6.29	-0.57	0.237	1	53	78.41	X01007	ENSMUSG00000059706	107531757	107548373	-	inside	881	631	Overlapping	NA
chr11	107547243	107547742	500	*	6.04	5.73	6.29	-0.57	0.237	1	53	78.41	X01007	ENSMUSG00000020721	107547930	107693826	+	upstream	-438	188	NearestLocation	Helz
chr19	3719256	3719755	500	*	6.04	5.73	6.29	-0.57	0.237	1	53	78.41	X01008	ENSMUSG00000035372	3708333	3717881	+	downstream	11173	1375	NearestLocation	1810055G02Rik
chr1	167001824	167002323	500	*	5.64	5.29	5.93	-0.65	0.237	1	39	60.99	X01005	ENSMUSG00000060568	167001417	167091302	+	inside	657	407	NearestLocation	Fam78b
chr5	119835208	119835707	500	*	5.64	5.29	5.93	-0.65	0.237	1	39	60.99	X01006	ENSMUSG00000018263	119834663	119885218	+	inside	795	545	NearestLocation	Tbx5
chr7	44589066	44589565	500	*	5.54	5.17	5.84	-0.67	0.237	1	36	57.12	X01003	ENSMUSG00000087560	44579968	44590624	-	inside	1308	1059	NearestLocation	NA
chr12	108332972	108333471	500	*	5.7	5.98	5.35	0.63	0.238	1	63	40.66	X01020	ENSMUSG00000021259	108334377	108362231	+	upstream	-1155	906	NearestLocation	Cyp46a1
chr13	31804503	31805002	500	*	5.7	5.98	5.35	0.63	0.238	1	63	40.66	X01021	ENSMUSG00000050295	31806691	31810643	+	upstream	-1939	1689	NearestLocation	Foxc1
chr2	137117008	137117507	500	*	6.09	6.34	5.79	0.55	0.238	1	81	55.18	X01018	ENSMUSG00000027276	137081456	137116644	-	upstream	-614	364	NearestLocation	Jag1
chr2	71787154	71787653	500	*	6.32	6.55	6.04	0.51	0.238	1	94	65.83	X01015	ENSMUSG00000027111	71745616	71858416	+	inside	41788	41538	Overlapping	Itga6
chr2	71787154	71787653	500	*	6.32	6.55	6.04	0.51	0.238	1	94	65.83	X01015	ENSMUSG00000081878	71762238	71762767	-	upstream	-24637	24387	NearestLocation	NA
chr6	54816443	54816942	500	*	6.32	6.55	6.04	0.51	0.238	1	94	65.83	X01016	ENSMUSG00000058446	54816916	54893500	+	overlapStart	-224	26	NearestLocation	Znrf2
chr11	69662340	69662839	500	*	6.53	6.75	6.28	0.48	0.238	1	108	77.45	X01012	ENSMUSG00000018761	69656697	69662642	-	overlapStart	52	197	NearestLocation	Mpdu1
chr6	72097120	72098082	963	*	7.62	7.77	7.44	0.34	0.238	1	219	173.28	X01014	ENSMUSG00000056091	72097592	72154571	+	overlapStart	9	472	NearestLocation	St3gal5
chr19	42147726	42148225	500	*	6.87	6.64	7.07	-0.43	0.238	1	100	134.56	X01017	ENSMUSG00000044345	42147400	42151703	+	inside	576	326	NearestLocation	Marveld1
chr1	56977031	56977530	500	*	6.81	6.57	7.01	-0.44	0.238	1	95	128.75	X01013	ENSMUSG00000038331	56793981	56978650	-	inside	1370	1120	Overlapping	Satb2
chr1	56977031	56977530	500	*	6.81	6.57	7.01	-0.44	0.238	1	95	128.75	X01013	ENSMUSG00000087022	56971412	57050084	+	inside	5868	5619	Overlapping	Gm38484;9130024F11Rik
[truncated: 24,425 more rows]
