# Supplementary material for: Zinc finger homeobox-3 (ZFHX3) orchestrates genome-wide daily gene expression in the suprachiasmatic nucleus
Source: bioRxiv preprint, doi:10.1101/2023.11.23.568399, version 6 (2025-02-07)
Supplement: Supplementary Table 3 [file 568399_file17.xlsx]

## Sheet: limma-voom_Creneg vs. +tam
SYMBOL	GENENAME	logFC	AveExpr	P.Value	adj.P.Val
Npy6r	neuropeptide Y receptor Y6	4.97363	1.47065	1.33399e-20	5.28228e-17
Vip	vasoactive intestinal polypeptide	3.64101	7.03616	6.53493e-25	5.17534e-21
Akr1c21	aldo-keto reductase family 1, member C21	3.28065	-3.28365	9.64223e-07	2.11236e-05
Foxn4	forkhead box N4	2.69338	-0.616879	1.95551e-10	2.67011e-08
Nmu	neuromedin U	2.64758	-1.58521	6.96504e-07	1.65149e-05
Gsdma	gasdermin A	2.54507	-2.61123	2.681e-09	2.44048e-07
Dhrs9	dehydrogenase/reductase (SDR family) member 9	2.49235	-1.72732	3.73937e-08	1.91656e-06
Prok2	prokineticin 2	2.47802	1.36261	0.00199492	0.00866886
Nrk	Nik related kinase	2.32122	-2.46345	1.2239e-06	2.51759e-05
Grp	gastrin releasing peptide	2.32086	3.50583	2.66773e-21	1.40847e-17
Nxf7	nuclear RNA export factor 7	2.0964	-0.450312	8.42232e-08	3.51982e-06
Slc13a1	solute carrier family 13 (sodium/sulfate symporters), member 1	2.07184	-0.264357	6.01888e-17	9.10194e-14
Cabp5	calcium binding protein 5	1.94052	-2.48963	5.20207e-08	2.45957e-06
Dkk2	dickkopf WNT signaling pathway inhibitor 2	1.85219	1.43493	9.66836e-07	2.11515e-05
Glyat	glycine-N-acyltransferase	1.81289	-2.80578	4.91178e-05	0.000459797
Gprc5a	G protein-coupled receptor, family C, group 5, member A	1.77086	-2.8568	7.02169e-06	9.72173e-05
Ctla2a	cytotoxic T lymphocyte-associated protein 2 alpha	1.72937	2.21117	5.19151e-15	3.57514e-12
Cyp2j13	cytochrome P450, family 2, subfamily j, polypeptide 13	1.66172	-1.91077	0.000633339	0.00345674
Nov	NA	1.60765	4.99476	4.02626e-14	2.05716e-11
Chrna3	cholinergic receptor, nicotinic, alpha polypeptide 3	1.59503	2.70822	4.59525e-08	2.24685e-06
Mtnr1a	melatonin receptor 1A	1.58844	0.0517638	1.5467e-10	2.20704e-08
Barhl2	BarH like homeobox 2	1.45156	-3.0542	0.00149716	0.00689148
C1ql3	C1q-like 3	1.42221	6.70882	2.44891e-09	2.28622e-07
Chrnb4	cholinergic receptor, nicotinic, beta polypeptide 4	1.41318	-1.1223	5.27181e-06	7.74891e-05
Tns4	tensin 4	1.40545	-3.22014	0.000172012	0.00122836
Klb	klotho beta	1.40442	1.26957	1.00184e-06	2.16188e-05
A730046J19Rik	RIKEN cDNA A730046J19 gene	1.35218	-0.568076	4.30693e-05	0.000414948
Fgfbp1	fibroblast growth factor binding protein 1	1.31635	-2.98392	0.00125881	0.00603095
Sh2d4b	SH2 domain containing 4B	1.28929	0.0746112	5.71612e-08	2.62428e-06
Nr1h5	nuclear receptor subfamily 1, group H, member 5	1.28773	-2.13648	0.00240568	0.0100856
Pde6a	phosphodiesterase 6A, cGMP-specific, rod, alpha	1.28397	-1.22426	1.21926e-09	1.31373e-07
Dennd2d	DENN/MADD domain containing 2D	1.23724	1.58022	3.06027e-08	1.63861e-06
C730002L08Rik	RIKEN cDNA C730002L08 gene	1.23707	-2.6976	0.00128398	0.00611088
Igf2bp3	insulin-like growth factor 2 mRNA binding protein 3	1.23577	-2.0432	0.00146799	0.00678281
Ovol2	ovo like zinc finger 2	1.22576	-4.00179	0.00806727	0.0265099
Fam19a4	NA	1.20359	0.829957	3.97475e-05	0.000389458
Wif1	Wnt inhibitory factor 1	1.1621	0.936284	8.03949e-07	1.81651e-05
Fam150b	NA	1.15895	0.535167	1.69794e-08	1.0187e-06
Aim1	NA	1.14932	0.675287	0.00023776	0.00157501
Tgm4	transglutaminase 4 (prostate)	1.14077	-1.77574	4.24014e-07	1.14023e-05
Sod3	superoxide dismutase 3, extracellular	1.13825	2.84284	1.02882e-10	1.62955e-08
Rtn4rl2	reticulon 4 receptor-like 2	1.13587	-2.05992	0.00284156	0.0115522
C130074G19Rik	RIKEN cDNA C130074G19 gene	1.1174	3.9408	1.73069e-11	3.82322e-09
1700093K21Rik	RIKEN cDNA 1700093K21 gene	1.09319	-2.6193	0.0139331	0.0413184
Ccdc69	coiled-coil domain containing 69	1.08433	-0.175163	1.84264e-08	1.08902e-06
Prokr2	prokineticin receptor 2	1.08222	6.51234	5.61556e-09	4.40321e-07
Wnt9b	wingless-type MMTV integration site family, member 9B	1.07414	-3.85551	0.0195906	0.0539686
Rhbdl2	rhomboid like 2	1.06614	0.949341	9.3586e-09	6.52999e-07
Ghsr	growth hormone secretagogue receptor	1.06081	3.85498	5.3693e-19	1.21492e-15
Slc1a7	solute carrier family 1 (glutamate transporter), member 7	1.05763	-1.22417	0.00128164	0.00610341
Slc4a5	solute carrier family 4, sodium bicarbonate cotransporter, member 5	1.05685	-2.04129	0.0106482	0.0333182
Neurod6	neurogenic differentiation 6	1.04439	0.65598	0.0016943	0.00762386
Il22	interleukin 22	1.03861	0.0437928	0.0133927	0.0400241
Dsg1c	desmoglein 1 gamma	1.03679	-1.22505	0.000576959	0.00320535
Wdr72	WD repeat domain 72	1.03446	0.262849	9.43793e-09	6.55646e-07
Kcnj13	potassium inwardly-rectifying channel, subfamily J, member 13	1.01948	-1.73276	0.00672812	0.0229139
Grpr	gastrin releasing peptide receptor	1.01008	2.77548	1.19505e-09	1.30235e-07
Emx2	empty spiracles homeobox 2	1.00408	-1.73371	0.0172808	0.0488943
Xlr4a	X-linked lymphocyte-regulated 4A	0.997418	-2.19154	0.00547938	0.0194635
Syt10	synaptotagmin X	0.985625	6.43936	1.32718e-11	3.23404e-09
Mpzl2	myelin protein zero-like 2	0.982633	-1.737	0.00106104	0.00525764
Nr4a3	nuclear receptor subfamily 4, group A, member 3	0.982069	4.65034	5.92954e-08	2.70271e-06
Foxf1	forkhead box F1	0.977986	-2.46491	0.0074263	0.0248154
Tnfaip3	tumor necrosis factor, alpha-induced protein 3	0.971639	1.4323	9.66353e-13	3.47865e-10
Otx2	orthodenticle homeobox 2	0.971399	-1.4332	0.0102687	0.0323352
AW549542	NA	0.964468	-1.8118	0.00322373	0.0128164
Fst	follistatin	0.955612	0.663784	2.53508e-05	0.000269847
Scube2	signal peptide, CUB domain, EGF-like 2	0.943866	1.35627	1.10672e-10	1.68552e-08
Rasl11b	RAS-like, family 11, member B	0.942542	4.77753	0.00656688	0.0224504
Mir132	microRNA 132	0.938953	-2.37699	0.0129586	0.0390063
Styk1	serine/threonine/tyrosine kinase 1	0.938174	2.30344	4.87898e-09	4.00405e-07
Nkd1	naked cuticle 1	0.935234	4.02426	7.39773e-11	1.22055e-08
Fam43a	family with sequence similarity 43, member A	0.934807	5.80936	1.14017e-07	4.39396e-06
Prr5l	proline rich 5 like	0.93203	4.28958	1.57295e-15	1.38411e-12
C230014O12Rik	RIKEN cDNA C230014O12 gene	0.93142	-0.0689816	1.15377e-10	1.74044e-08
Lrrc14b	leucine rich repeat containing 14B	0.926132	-2.08252	0.0205352	0.055992
Gm11549	NA	0.922889	-0.776212	0.0108179	0.0337094
Dusp4	dual specificity phosphatase 4	0.920493	3.82538	0.00478222	0.0175013
Krt25	keratin 25	0.91655	-1.92682	0.000220008	0.00148159
Adamts19	a disintegrin-like and metallopeptidase (reprolysin type) with thrombospondin type 1 motif, 19	0.915842	0.912482	3.10451e-10	3.973e-08
Cacna2d4	calcium channel, voltage-dependent, alpha 2/delta subunit 4	0.915149	2.73273	3.15116e-11	5.94182e-09
Nms	neuromedin S	0.909272	4.18551	2.96281e-07	8.64235e-06
Krt12	keratin 12	0.903979	-1.77759	0.000216159	0.00146369
Usp18	ubiquitin specific peptidase 18	0.901779	-0.614002	0.000902236	0.0045965
Edaradd	EDAR (ectodysplasin-A receptor)-associated death domain	0.895237	0.752983	2.305e-07	7.30176e-06
Mas1	MAS1 oncogene	0.890508	-2.55206	0.0214391	0.0579776
Hs3st3a1	heparan sulfate (glucosamine) 3-O-sulfotransferase 3A1	0.882432	1.42616	6.8757e-07	1.64012e-05
F13a1	coagulation factor XIII, A1 subunit	0.879078	-1.51376	0.000422916	0.00249481
E330034G19Rik	RIKEN cDNA E330034G19 gene	0.878712	-2.32422	0.0122184	0.037236
Adgrg6	adhesion G protein-coupled receptor G6	0.866302	1.30457	7.43324e-06	0.000101583
Cd24a	CD24a antigen	0.863938	5.98679	1.12535e-14	7.12977e-12
Stk32b	serine/threonine kinase 32B	0.862532	3.99308	1.48459e-19	3.91906e-16
Creb3l1	cAMP responsive element binding protein 3-like 1	0.86164	3.69627	0.00257154	0.0106681
Kcne2	potassium voltage-gated channel, Isk-related subfamily, gene 2	0.855505	-1.66864	0.0192338	0.0532037
Mrc1	mannose receptor, C type 1	0.854068	-0.591853	7.14166e-05	0.00061745
BC016579	cDNA sequence, BC016579	0.853397	-2.41716	0.00187285	0.00825609
Synpr	synaptoporin	0.848489	6.46757	7.40302e-17	9.77137e-14
Oip5	Opa interacting protein 5	0.84758	-2.00746	0.00179423	0.00799571
Tbr1	T-box brain transcription factor 1	0.844733	1.2032	0.00252843	0.0105195
Omd	osteomodulin	0.842631	-2.55863	0.0125489	0.0380478
Bmp5	bone morphogenetic protein 5	0.840575	-0.98929	1.5831e-06	3.01694e-05
Npr1	natriuretic peptide receptor 1	0.837956	2.10685	1.34157e-06	2.67622e-05
Pparg	peroxisome proliferator activated receptor gamma	0.832662	0.210544	1.11599e-07	4.32179e-06
Ifi44	interferon-induced protein 44	0.82965	-1.84674	0.0109226	0.0339755
Ccna1	cyclin A1	0.829237	0.601881	0.000103688	0.000826531
Rasd1	RAS, dexamethasone-induced 1	0.829209	6.20051	0.00157845	0.00719043
Cps1	carbamoyl-phosphate synthetase 1	0.827691	-0.351915	0.000635697	0.00346484
Fam122b	family with sequence similarity 122, member B	0.82486	4.76866	1.82481e-10	2.53536e-08
St3gal1	ST3 beta-galactoside alpha-2,3-sialyltransferase 1	0.822403	4.00632	4.26973e-08	2.12668e-06
Kcnh8	potassium voltage-gated channel, subfamily H (eag-related), member 8	0.821499	3.66023	3.11489e-07	8.92165e-06
Brs3	bombesin-like receptor 3	0.819036	0.550373	0.00622326	0.0214972
Insl6	insulin-like 6	0.814849	-1.01753	3.59333e-05	0.000358857
Otx1	orthodenticle homeobox 1	0.806657	-2.31999	0.00788018	0.0259752
Egr3	early growth response 3	0.806296	2.56375	1.36682e-05	0.000164756
Krt9	keratin 9	0.7995	-0.212351	0.000181281	0.00127266
Aldh1a2	aldehyde dehydrogenase family 1, subfamily A2	0.798218	2.89752	1.07522e-05	0.000136368
Ntf3	neurotrophin 3	0.796876	-2.63238	0.0172113	0.0487412
Chrdl1	chordin-like 1	0.796374	1.01345	2.16978e-09	2.10842e-07
Mmp19	matrix metallopeptidase 19	0.796065	-0.824625	0.000158437	0.00115431
Ogn	osteoglycin	0.793167	0.651737	0.000121562	0.000936487
4833415N18Rik	RIKEN cDNA 4833415N18 gene	0.788612	-2.90734	0.017971	0.050406
Egflam	EGF-like, fibronectin type III and laminin G domains	0.780164	2.6899	1.10354e-10	1.68552e-08
Serpinb11	serine (or cysteine) peptidase inhibitor, clade B (ovalbumin), member 11	0.778356	-0.711575	0.00018801	0.00130839
Krt26	keratin 26	0.777799	-2.7308	0.014434	0.0425104
C2cd4b	C2 calcium-dependent domain containing 4B	0.773946	-0.883191	0.000484602	0.002779
Cyp4f41-ps	cytochrome P450, family 4, subfamily f, polypeptide 41 pseudogene	0.771831	-1.63503	0.0039803	0.0151877
Msrb3	methionine sulfoxide reductase B3	0.764518	2.69831	2.26316e-12	7.46796e-10
Cr2	complement receptor 2	0.763739	-0.458277	0.000427207	0.00251825
B230112J18Rik	RIKEN cDNA B230112J18 gene	0.759179	-2.12229	0.00619838	0.0214452
Agmat	agmatine ureohydrolase (agmatinase)	0.757645	-2.5914	0.0215213	0.058145
Esr2	estrogen receptor 2 (beta)	0.748997	0.0151381	1.19559e-05	0.000148409
Usp43	ubiquitin specific peptidase 43	0.741482	1.51185	2.83435e-08	1.54805e-06
Smc2os	structural maintenance of chromosomes 2, opposite strand	0.734746	-0.993063	4.56566e-05	0.000434327
Fbxl21	F-box and leucine-rich repeat protein 21	0.733771	3.99652	1.35826e-05	0.0001641
Osr1	odd-skipped related transcription factor 1	0.732038	-1.85017	0.0144644	0.042576
Mir7688	microRNA 7688	0.731058	-1.229	0.00288018	0.0116763
Cck	cholecystokinin	0.72891	3.59204	0.000214745	0.00145605
F930015N05Rik	RIKEN cDNA F930015N05 gene	0.728089	2.05494	3.93366e-06	6.24301e-05
1810041H14Rik	RIKEN cDNA 1810041H14 gene	0.727306	-2.74689	0.0159281	0.0460375
Slc17a7	solute carrier family 17 (sodium-dependent inorganic phosphate cotransporter), member 7	0.722901	3.49232	0.0173319	0.0489864
Ptgdr	prostaglandin D receptor	0.722232	-2.03255	0.0119581	0.0365647
Mgl2	macrophage galactose N-acetyl-galactosamine specific lectin 2	0.72055	-2.48758	0.0190476	0.0528085
Mybpc2	myosin binding protein C, fast-type	0.717285	-1.49744	0.00477093	0.0174738
Ms4a6b	membrane-spanning 4-domains, subfamily A, member 6B	0.709256	-1.62278	0.0010627	0.00526331
Tgtp2	T cell specific GTPase 2	0.707653	-2.1894	0.0136488	0.040613
Il1rl1	interleukin 1 receptor-like 1	0.707154	-2.24072	0.0157909	0.045691
A930003A15Rik	RIKEN cDNA A930003A15 gene	0.705581	-2.02447	0.00699829	0.0236446
Stk32a	serine/threonine kinase 32A	0.704163	6.11528	1.50943e-11	3.56834e-09
Rab26os	RAB26, member RAS oncogene family, opposite strand	0.701718	-0.146069	1.42559e-06	2.78421e-05
Skap1	src family associated phosphoprotein 1	0.701432	1.58291	2.87752e-10	3.73582e-08
Prr15	proline rich 15	0.700007	1.53769	9.03486e-05	0.000743007
Vipr2	vasoactive intestinal peptide receptor 2	0.699075	6.37593	2.70818e-05	0.000285016
Igf1	insulin-like growth factor 1	0.698744	0.100214	0.000440787	0.00258483
Meis2	Meis homeobox 2	0.694546	2.61022	0.00120275	0.00581693
Prelid2	PRELI domain containing 2	0.693267	-1.64735	0.0040891	0.0154983
Neurod2	neurogenic differentiation 2	0.693193	0.718606	0.0122677	0.0373597
Slc26a4	solute carrier family 26, member 4	0.692734	-1.84909	0.00265449	0.0109349
Slc4a11	solute carrier family 4, sodium bicarbonate transporter-like, member 11	0.692292	0.985834	4.42113e-05	0.000423114
Cthrc1	collagen triple helix repeat containing 1	0.691936	2.97427	4.96314e-10	6.04701e-08
Olfr1033	olfactory receptor 1033	0.691735	-1.60054	0.00382905	0.0147348
Chrna1	cholinergic receptor, nicotinic, alpha polypeptide 1 (muscle)	0.688904	-1.85024	0.0060424	0.0210019
Ngf	nerve growth factor	0.68792	-1.2776	0.0183438	0.051288
Gm26705	predicted gene, 26705	0.687707	-2.28997	0.0143592	0.0423293
Stx11	syntaxin 11	0.683425	-2.21082	0.0057424	0.0202165
Gadd45a	growth arrest and DNA-damage-inducible 45 alpha	0.680386	4.4501	5.65311e-10	6.78331e-08
Abca6	ATP-binding cassette, sub-family A (ABC1), member 6	0.678037	1.85126	1.5034e-08	9.30169e-07
Hdc	histidine decarboxylase	0.675584	3.8237	8.13345e-07	1.83352e-05
Gbp11	guanylate binding protein 11	0.674945	-0.657981	0.00494857	0.0179648
BC046251	cDNA sequence BC046251	0.669871	-0.684357	0.00226559	0.00960252
Serpine1	serine (or cysteine) peptidase inhibitor, clade E, member 1	0.668727	3.13344	0.00510981	0.0183983
Defb1	defensin beta 1	0.668387	-0.421314	0.00754672	0.0251066
Cadps2	Ca2+dependent activator protein for secretion 2	0.668176	7.92814	4.90548e-14	2.35448e-11
Ptgs2	prostaglandin-endoperoxide synthase 2	0.666653	-1.23476	0.00151371	0.00694743
Rgs9bp	regulator of G-protein signalling 9 binding protein	0.665255	-1.49672	0.0146865	0.0430936
Atp8b5	ATPase, class I, type 8B, member 5	0.664847	2.01192	3.49747e-05	0.000351055
Bves	blood vessel epicardial substance	0.660586	0.347232	0.000155041	0.00113532
Ctla2b	cytotoxic T lymphocyte-associated protein 2 beta	0.658952	-1.68322	0.00206578	0.00892035
Gm16062	predicted gene 16062	0.656929	0.273321	5.50729e-05	0.000501898
Ppp1r1a	protein phosphatase 1, regulatory inhibitor subunit 1A	0.655019	5.36727	1.51442e-06	2.91104e-05
Flt3	FMS-like tyrosine kinase 3	0.654927	3.74746	5.0025e-08	2.37764e-06
Aldh1a3	aldehyde dehydrogenase family 1, subfamily A3	0.649429	-2.36875	0.00521889	0.0186976
Lgr5	leucine rich repeat containing G protein coupled receptor 5	0.649284	2.14122	1.64814e-06	3.10034e-05
Tgfa	transforming growth factor alpha	0.648692	6.40696	1.7152e-11	3.82322e-09
Isg15	ISG15 ubiquitin-like modifier	0.648138	-0.7216	0.0175759	0.0495184
Cast	calpastatin	0.647508	3.9403	4.39725e-11	7.73867e-09
Npbwr1	neuropeptides B/W receptor 1	0.647168	4.17271	1.27859e-05	0.000156348
Thsd7b	thrombospondin, type I, domain containing 7B	0.64654	5.2988	1.57433e-13	6.56207e-11
Mreg	melanoregulin	0.645596	3.82259	5.35039e-11	9.11235e-09
Clec4a3	C-type lectin domain family 4, member a3	0.644699	-1.7062	0.00643209	0.0220611
Upk1b	uroplakin 1B	0.641569	-1.15778	0.00588343	0.0205894
Sec16b	SEC16 homolog B (S. cerevisiae)	0.638409	-0.304866	0.00073012	0.00386897
Inhba	inhibin beta-A	0.637629	-0.825103	0.000175135	0.00124449
Tmem232	transmembrane protein 232	0.629418	1.76228	6.65464e-06	9.33594e-05
Ndrg1	N-myc downstream regulated gene 1	0.628336	7.64811	3.80544e-12	1.07633e-09
2700069I18Rik	RIKEN cDNA 2700069I18 gene	0.626701	-0.0450313	3.37511e-06	5.51687e-05
Nr4a2	nuclear receptor subfamily 4, group A, member 2	0.626185	2.14801	4.21961e-05	0.000408273
F9	coagulation factor IX	0.622604	-2.10897	0.020465	0.0558601
4930515G01Rik	RIKEN cDNA 4930515G01 gene	0.619695	-1.5922	0.0018787	0.00827495
Tuba8	tubulin, alpha 8	0.617346	3.33766	0.000579042	0.00321467
Rspo2	R-spondin 2	0.6166	-0.554136	0.0178012	0.0500006
Sox3	SRY (sex determining region Y)-box 3	0.615263	4.47306	1.07534e-05	0.000136368
Igfbp4	insulin-like growth factor binding protein 4	0.61182	2.76092	1.1208e-07	4.32984e-06
Top2a	topoisomerase (DNA) II alpha	0.607754	0.156662	2.90394e-05	0.000301412
Ifit1	interferon-induced protein with tetratricopeptide repeats 1	0.606536	1.04478	0.00698234	0.0236008
Kit	KIT proto-oncogene receptor tyrosine kinase	0.604638	6.0013	1.29099e-11	3.19499e-09
Scg2	secretogranin II	0.603405	11.3315	5.22319e-11	8.99241e-09
Gm10640	predicted gene 10640	0.603186	-1.89163	0.0149634	0.0436877
3632451O06Rik	NA	0.60264	6.06148	4.65244e-14	2.30281e-11
Kcnv2	potassium channel, subfamily V, member 2	0.601113	-1.42712	0.00716994	0.0241114
Cracr2a	calcium release activated channel regulator 2A	0.597761	-1.19222	0.00704463	0.0237657
Avp	arginine vasopressin	0.595809	7.37354	0.0210771	0.0571897
Tmem40	transmembrane protein 40	0.595234	-2.12776	0.0127235	0.0384888
Ace2	angiotensin I converting enzyme (peptidyl-dipeptidase A) 2	0.594514	-0.551012	0.00027894	0.00178655
Sertm1	serine rich and transmembrane domain containing 1	0.592158	4.27242	3.85352e-06	6.14043e-05
Drd1	dopamine receptor D1	0.591229	4.69137	6.23429e-07	1.54045e-05
Aunip	aurora kinase A and ninein interacting protein	0.590574	-2.13574	0.0154384	0.0448595
2010005H15Rik	NA	0.58976	2.54821	5.33984e-05	0.000490418
Itpripl2	inositol 1,4,5-triphosphate receptor interacting protein-like 2	0.589465	2.58978	1.15778e-07	4.44023e-06
Samd9l	sterile alpha motif domain containing 9-like	0.582125	2.42377	1.04141e-05	0.000133024
Tspo2	translocator protein 2	0.580665	-1.68745	0.0126703	0.0383426
Dtl	denticleless E3 ubiquitin protein ligase	0.578935	-1.46502	0.0220106	0.0590591
Slc22a3	solute carrier family 22 (organic cation transporter), member 3	0.576031	2.62635	5.5332e-09	4.36022e-07
Plekhg1	pleckstrin homology domain containing, family G (with RhoGef domain) member 1	0.575371	4.16985	7.63725e-16	8.47031e-13
Gm20257	caspase 8 pseudogene	0.574828	-0.376155	0.000148839	0.00109956
Slfn2	schlafen 2	0.573483	-1.06758	0.0134743	0.0402113
Kcng3	potassium voltage-gated channel, subfamily G, member 3	0.571198	-0.948504	0.00781459	0.0257969
Rad51ap2	RAD51 associated protein 2	0.570858	-1.48111	0.0140189	0.0414961
Rhpn2	rhophilin, Rho GTPase binding protein 2	0.570628	4.29776	4.51364e-12	1.25424e-09
Dach2	dachshund family transcription factor 2	0.569331	1.9283	3.22261e-07	9.14748e-06
S100a4	S100 calcium binding protein A4	0.567773	-0.884264	0.0103684	0.0325712
Snord104	small nucleolar RNA, C/D box 104	0.566455	-1.00962	0.00528681	0.0188854
Piwil2	piwi-like RNA-mediated gene silencing 2	0.566165	-0.513414	0.0103595	0.03255
Sfrp2	secreted frizzled-related protein 2	0.562321	2.76744	2.13137e-07	6.96496e-06
Tpbg	trophoblast glycoprotein	0.56055	5.03027	6.21356e-10	7.36555e-08
B3gnt5	UDP-GlcNAc:betaGal beta-1,3-N-acetylglucosaminyltransferase 5	0.55967	-0.422914	0.000316973	0.0019844
Slc2a13	solute carrier family 2 (facilitated glucose transporter), member 13	0.559192	7.95732	2.13792e-05	0.000234993
Pvalb	parvalbumin	0.55911	2.05279	0.00227589	0.00963847
2410004I01Rik	RIKEN cDNA 2410004I01 gene	0.55783	-0.582482	0.00105548	0.00523573
Gm10785	predicted gene 10785	0.557709	-0.190629	0.000167669	0.00120604
Ebf1	early B cell factor 1	0.557567	2.01082	0.000871113	0.00446812
Serpind1	serine (or cysteine) peptidase inhibitor, clade D, member 1	0.557508	0.695397	0.000281114	0.00179611
Lgals1	lectin, galactose binding, soluble 1	0.555683	2.06081	5.01377e-08	2.37764e-06
Cdkn1c	cyclin-dependent kinase inhibitor 1C (P57)	0.555596	2.67288	1.68495e-06	3.15087e-05
Agtr2	angiotensin II receptor, type 2	0.549056	0.553964	0.000470668	0.00271566
LOC100862268	NA	0.548373	-1.30796	0.0169747	0.0482784
Atp5k	ATP synthase, H transporting, mitochondrial F1F0 complex, subunit E	0.548307	3.89945	7.94307e-08	3.36391e-06
Fam83d	family with sequence similarity 83, member D	0.546824	0.447662	0.000342705	0.0021146
Ednra	endothelin receptor type A	0.546786	2.51884	1.87451e-10	2.58178e-08
2900041M22Rik	RIKEN cDNA 2900041M22 gene	0.54479	-1.21513	0.00835162	0.0272576
Adgrf4	adhesion G protein-coupled receptor F4	0.543449	-0.131786	0.0137816	0.0409545
Npy5r	neuropeptide Y receptor Y5	0.542502	3.2984	2.57585e-11	5.20519e-09
Thbs1	thrombospondin 1	0.54231	0.640543	0.000166676	0.00120071
4921525O09Rik	RIKEN cDNA 4921525O09 gene	0.542229	-1.9802	0.0180322	0.0505598
Rspo3	R-spondin 3	0.53768	2.18143	1.14659e-06	2.39272e-05
Fmod	fibromodulin	0.537634	1.51635	0.00254077	0.0105653
Glt8d2	glycosyltransferase 8 domain containing 2	0.53704	2.26165	5.60127e-08	2.59411e-06
Rps29	ribosomal protein S29	0.536006	5.64396	6.45865e-08	2.87355e-06
4930593C16Rik	RIKEN cDNA 4930593C16 gene	0.535775	-1.15148	0.00255458	0.0106055
1700101I11Rik	RIKEN cDNA 1700101I11 gene	0.533519	-0.351396	0.000193443	0.00133855
Ugt1a7c	UDP glucuronosyltransferase 1 family, polypeptide A7C	0.532672	-2.00158	0.0128405	0.0387393
Usmg5	NA	0.529487	5.75633	3.78675e-08	1.92238e-06
Chga	chromogranin A	0.528166	8.64624	1.14525e-07	4.40283e-06
Rpl38	ribosomal protein L38	0.527751	5.88683	7.04747e-09	5.19185e-07
Chodl	chondrolectin	0.526985	5.42945	3.19915e-06	5.28361e-05
Gm10658	predicted gene 10658	0.526899	-0.780509	0.000508603	0.00289048
Adgrd1	adhesion G protein-coupled receptor D1	0.523089	-0.434088	0.000881097	0.00450777
Fos	FBJ osteosarcoma oncogene	0.522688	3.93133	0.0193571	0.0534701
Trabd2b	TraB domain containing 2B	0.522307	-0.375762	0.0012775	0.00609167
Prdm1	PR domain containing 1, with ZNF domain	0.52229	-1.57876	0.0199079	0.0546769
Arhgap15	Rho GTPase activating protein 15	0.519759	-0.0859618	0.0097731	0.0311023
Nmbr	neuromedin B receptor	0.519446	1.2039	0.000609832	0.0033527
Ly96	lymphocyte antigen 96	0.51839	-1.7627	0.0167258	0.047742
0610040B10Rik	RIKEN cDNA 0610040B10 gene	0.516627	0.724354	0.00037177	0.00225792
D7Ertd443e	DNA segment, Chr 7, ERATO Doi 443, expressed	0.51391	2.76353	1.96173e-06	3.55514e-05
Atp10d	ATPase, class V, type 10D	0.513206	1.59611	3.25741e-07	9.21323e-06
Shisa6	shisa family member 6	0.513156	3.63475	2.07431e-09	2.04929e-07
Igfbp5	insulin-like growth factor binding protein 5	0.51278	9.08725	9.83128e-06	0.000127742
Nsmf	NMDA receptor synaptonuclear signaling and neuronal migration factor	0.512084	7.63468	1.75824e-09	1.7967e-07
Tesk2	testis-specific kinase 2	0.512044	3.32501	1.62018e-08	9.83219e-07
Car4	carbonic anhydrase 4	0.511227	2.451	1.32063e-06	2.65451e-05
Myzap	myocardial zonula adherens protein	0.510459	0.035425	0.00292859	0.0118329
Pcdhac1	protocadherin alpha subfamily C, 1	0.508813	1.66979	0.00445758	0.016597
2010107E04Rik	NA	0.508693	4.70559	2.18377e-08	1.2442e-06
Calcr	calcitonin receptor	0.506263	5.3408	6.59169e-08	2.90016e-06
Jchain	immunoglobulin joining chain	0.506221	-1.22336	0.00334796	0.013224
Gm10677	predicted gene 10677	0.504452	-1.52977	0.00987487	0.0313406
Etaa1os	Ewing tumor-associated antigen 1, opposite strand	0.503758	-1.12307	0.0038215	0.0147093
Pgm5	phosphoglucomutase 5	0.503646	1.80899	4.0352e-06	6.33812e-05
Rps28	ribosomal protein S28	0.502489	6.02504	6.37981e-09	4.92067e-07
S100a10	S100 calcium binding protein A10 (calpactin)	0.499849	3.37543	1.95639e-07	6.53741e-06
Rab37	RAB37, member RAS oncogene family	0.4992	1.2532	0.000632562	0.00345586
Rbpms2	RNA binding protein with multiple splicing 2	0.499097	1.46265	2.01251e-07	6.66866e-06
Dapk2	death-associated protein kinase 2	0.495205	-0.334521	0.00205308	0.00887519
Arhgap10	Rho GTPase activating protein 10	0.494731	1.39929	9.21675e-05	0.000756786
Fabp7	fatty acid binding protein 7, brain	0.49471	5.19291	0.00456125	0.0168796
Kif18a	kinesin family member 18A	0.492244	-0.709352	0.00133084	0.00629006
Sytl5	synaptotagmin-like 5	0.491526	3.62985	2.6002e-07	7.95901e-06
Snora65	small nucleolar RNA, H/ACA box 65	0.487889	-1.12316	0.0112306	0.0347559
2810403D21Rik	RIKEN cDNA 2810403D21 gene	0.484221	0.369818	8.24581e-05	0.000689574
Nrn1	neuritin 1	0.482944	4.43568	0.000275586	0.00177008
Gm5468	NA	0.481861	1.59773	2.59194e-07	7.95901e-06
Fhl2	four and a half LIM domains 2	0.479875	2.00704	1.06199e-06	2.25319e-05
Calca	calcitonin/calcitonin-related polypeptide, alpha	0.479	1.57475	0.000370708	0.00225312
1700001G11Rik	RIKEN cDNA 1700001G11 gene	0.478683	-1.51273	0.0170091	0.0483415
Syt17	synaptotagmin XVII	0.478423	4.83243	7.70985e-06	0.000104587
Cyp4x1os	cytochrome P450, family 4, subfamily x, polypeptide 1, opposite strand	0.477438	-1.27234	0.0173403	0.0490015
Sgpp2	sphingosine-1-phosphate phosphatase 2	0.476515	4.81924	1.32508e-10	1.9255e-08
B230119M05Rik	RIKEN cDNA B230119M05 gene	0.475404	-1.68552	0.0169947	0.0483115
Spx	spexin hormone	0.475292	1.28955	0.000289046	0.00183716
Hgf	hepatocyte growth factor	0.475086	-1.79171	0.0164164	0.0470939
Cd74	CD74 antigen (invariant polypeptide of major histocompatibility complex, class II antigen-associated)	0.474829	0.0344239	0.0169707	0.0482755
Gm15421	ribosomal protein L22 like 1 pseudogene	0.468317	-1.40512	0.0165468	0.047364
Tmem51	transmembrane protein 51	0.467515	3.90389	0.00673559	0.0229331
Ramp3	receptor (calcitonin) activity modifying protein 3	0.467217	0.669625	0.00242016	0.0101437
BC028528	cDNA sequence BC028528	0.466906	-0.174536	0.00127496	0.00608437
Rora	RAR-related orphan receptor alpha	0.466477	7.4283	0.00149997	0.00689838
Gm15417	predicted gene 15417	0.465561	1.58233	2.2273e-05	0.000243466
Col4a3	collagen, type IV, alpha 3	0.463186	0.143268	0.00654657	0.0223907
Rps21	ribosomal protein S21	0.461921	7.12773	3.80977e-08	1.92789e-06
Arl4a	ADP-ribosylation factor-like 4A	0.460061	5.97378	7.63019e-07	1.75916e-05
Pde7b	phosphodiesterase 7B	0.459934	6.67654	6.24387e-07	1.54045e-05
A330076C08Rik	RIKEN cDNA A330076C08 gene	0.459632	0.103113	0.0060534	0.0210355
Gm5089	predicted gene 5089	0.459059	1.46784	3.37091e-05	0.000340075
Fam196a	NA	0.458118	5.17425	1.06647e-08	7.09741e-07
Gas2	growth arrest specific 2	0.457422	3.81242	7.69066e-12	1.99692e-09
Hbegf	heparin-binding EGF-like growth factor	0.456625	4.14938	2.4561e-07	7.68817e-06
Nrip3	nuclear receptor interacting protein 3	0.456202	7.54865	3.11038e-10	3.973e-08
Pantr1	POU domain, class 3, transcription factor 3 adjacent noncoding transcript 1	0.456045	2.38251	1.4033e-05	0.00016864
Rpl39	ribosomal protein L39	0.454441	4.74304	1.32963e-06	2.65909e-05
Egln3	egl-9 family hypoxia-inducible factor 3	0.452987	1.96781	6.32766e-07	1.54905e-05
Zfp389	zinc finger protein 389	0.452936	-0.398222	0.00105229	0.00522482
Pole2	polymerase (DNA directed), epsilon 2 (p59 subunit)	0.451581	-1.2564	0.0163224	0.0469289
Tesc	tescalcin	0.44886	3.81081	9.59591e-05	0.000778635
Klhl41	kelch-like 41	0.448614	-0.473371	0.00319856	0.0127368
Rtn4rl1	reticulon 4 receptor-like 1	0.447582	3.12589	1.23823e-06	2.52736e-05
Gm10433	predicted gene 10433	0.447076	-0.751302	0.0105491	0.0330734
Hpgd	hydroxyprostaglandin dehydrogenase 15 (NAD)	0.446865	2.38175	2.0871e-06	3.75227e-05
Clec2d	C-type lectin domain family 2, member d	0.446646	-0.174392	0.00685385	0.0232558
Sostdc1	sclerostin domain containing 1	0.446383	1.0686	0.00676056	0.0230083
Lepr	leptin receptor	0.445576	0.426041	0.0171668	0.0486506
4930426D05Rik	RIKEN cDNA 4930426D05 gene	0.444103	1.62832	0.00671915	0.022892
Kitl	kit ligand	0.443274	3.99619	3.54421e-09	3.07725e-07
Toporsos	NA	0.443068	-0.531096	0.0204893	0.0558956
Rpl22l1	ribosomal protein L22 like 1	0.442066	6.24054	2.12193e-08	1.22216e-06
Slc6a3	solute carrier family 6 (neurotransmitter transporter, dopamine), member 3	0.43937	1.85881	0.018563	0.0517466
Lamc2	laminin, gamma 2	0.438802	0.865474	0.000491703	0.00281057
1810044D09Rik	RIKEN cDNA 1810044D09 gene	0.438742	-0.60966	0.00678177	0.0230656
Lsm5	LSM5 homolog, U6 small nuclear RNA and mRNA degradation associated	0.435528	2.20653	2.98276e-06	5.00997e-05
Ptp4a1	protein tyrosine phosphatase 4a1	0.4355	3.14223	2.22316e-05	0.000243181
Ptgfr	prostaglandin F receptor	0.434852	0.59226	0.0192193	0.0531768
Maff	v-maf musculoaponeurotic fibrosarcoma oncogene family, protein F (avian)	0.433797	1.68631	0.0024675	0.0103121
Pcdh20	protocadherin 20	0.433484	5.52329	4.79417e-10	5.91811e-08
Sntg2	syntrophin, gamma 2	0.433379	1.74648	5.17506e-06	7.64625e-05
Bdnf	brain derived neurotrophic factor	0.432999	3.22727	0.000914584	0.00464596
Dnmt3b	DNA methyltransferase 3B	0.432396	-0.380579	0.000850533	0.0043953
Hs3st2	heparan sulfate (glucosamine) 3-O-sulfotransferase 2	0.431222	2.03331	0.00164141	0.00743233
Akap17b	A kinase (PRKA) anchor protein 17B	0.430686	6.60279	5.94786e-05	0.000532437
Galntl6	UDP-N-acetyl-alpha-D-galactosamine:polypeptide N-acetylgalactosaminyltransferase-like 6	0.429946	4.53311	5.39768e-07	1.3745e-05
Prss23	protease, serine 23	0.429416	1.85128	6.04224e-07	1.5024e-05
Trh	thyrotropin releasing hormone	0.427316	6.90001	0.0137259	0.0407966
Myh15	myosin, heavy chain 15	0.427056	2.15506	7.79054e-07	1.78355e-05
Clec14a	C-type lectin domain family 14, member a	0.426976	0.933191	5.60633e-05	0.000508292
Flrt3	fibronectin leucine rich transmembrane protein 3	0.426421	6.41944	4.25654e-06	6.56469e-05
Gm16907	predicted gene, 16907	0.426256	-0.590918	0.0150203	0.0438294
AF357359	snoRNA AF357359	0.425498	4.3901	6.28823e-07	1.54417e-05
Gm15867	predicted gene 15867	0.424343	-0.881147	0.00587801	0.020575
Zfp119a	zinc finger protein 119a	0.424121	2.28193	2.15376e-07	6.99046e-06
Trim30a	tripartite motif-containing 30A	0.423887	0.827202	0.00220543	0.0094029
Gcnt4	glucosaminyl (N-acetyl) transferase 4, core 2 (beta-1,6-N-acetylglucosaminyltransferase)	0.42374	1.62376	9.84572e-05	0.00079283
2610020C07Rik	RIKEN cDNA 2610020C07 gene	0.422277	0.396601	0.00113305	0.0055356
Rln1	relaxin 1	0.421355	1.28258	0.000445403	0.00260243
Ecscr	endothelial cell surface expressed chemotaxis and apoptosis regulator	0.420794	-0.0853221	0.00515229	0.0185134
Cdh13	cadherin 13	0.4202	6.87472	7.29284e-08	3.13889e-06
Snai2	snail family zinc finger 2	0.420064	-0.137752	0.00365955	0.0142172
Marveld3	MARVEL (membrane-associating) domain containing 3	0.417482	0.00755498	0.000546472	0.00306067
Gm684	NA	0.417115	-0.337002	0.0116511	0.0357708
Lpar6	lysophosphatidic acid receptor 6	0.416618	2.38972	0.000111832	0.000872563
C3ar1	complement component 3a receptor 1	0.415167	0.0663319	0.00186117	0.00821374
Grik1	glutamate receptor, ionotropic, kainate 1	0.415059	5.07487	1.12935e-11	2.83933e-09
Ndufa3	NADH:ubiquinone oxidoreductase subunit A3	0.414826	5.02501	1.49701e-08	9.29851e-07
Pros1	protein S (alpha)	0.414778	5.12667	5.02227e-06	7.4763e-05
Peg10	paternally expressed 10	0.413607	9.17044	8.57519e-10	9.70161e-08
Osmr	oncostatin M receptor	0.413059	0.641497	0.000487024	0.0027889
Rpl35a	ribosomal protein L35A	0.41257	7.07971	1.09796e-07	4.27286e-06
Nnat	neuronatin	0.41197	10.3414	7.22777e-08	3.12789e-06
Strip2	striatin interacting protein 2	0.411141	3.99181	0.00389358	0.0149287
Avpi1	arginine vasopressin-induced 1	0.410471	4.15543	2.47128e-05	0.000263586
Kcnmb2	potassium large conductance calcium-activated channel, subfamily M, beta member 2	0.410173	1.65677	5.62382e-06	8.19464e-05
Tnfsf10	tumor necrosis factor (ligand) superfamily, member 10	0.409318	-0.0840567	0.00975172	0.0310405
Cela1	chymotrypsin-like elastase family, member 1	0.409168	-0.0641538	0.00180183	0.00802111
Pim1	proviral integration site 1	0.408091	2.25232	8.83173e-05	0.000730856
Clec5a	C-type lectin domain family 5, member a	0.407568	0.695373	0.00115784	0.00562747
Parm1	prostate androgen-regulated mucin-like protein 1	0.406319	6.20034	1.40371e-06	2.75165e-05
Sec61g	SEC61, gamma subunit	0.406205	3.61383	1.22382e-08	8.04321e-07
Clgn	calmegin	0.406135	2.65913	5.00526e-07	1.29964e-05
LOC100504703	NA	0.405657	0.141374	0.00101795	0.00507978
Tmem178	transmembrane protein 178	0.405593	3.06443	1.12492e-08	7.45506e-07
Tmem132c	transmembrane protein 132C	0.405573	5.05842	2.87072e-08	1.56252e-06
Sema3a	sema domain, immunoglobulin domain (Ig), short basic domain, secreted, (semaphorin) 3A	0.404883	2.27745	0.000797387	0.0041655
Tmem203	transmembrane protein 203	0.404687	2.49285	1.04453e-07	4.11177e-06
5730480H06Rik	RIKEN cDNA 5730480H06 gene	0.403097	-0.32019	0.00713368	0.0240099
Ano3	anoctamin 3	0.402865	3.13977	0.00224833	0.00954984
Olfml3	olfactomedin-like 3	0.402252	3.74632	4.09685e-05	0.000399078
Klhl14	kelch-like 14	0.401951	2.83679	0.000325234	0.00202333
Ctxn2	cortexin 2	0.401156	4.51787	2.63241e-11	5.20519e-09
Ndnf	neuron-derived neurotrophic factor	0.398675	2.70935	3.16912e-06	5.25059e-05
Gm10778	predicted gene 10778	0.397307	0.473911	0.000474325	0.00272797
Cecr2	CECR2, histone acetyl-lysine reader	0.396929	3.67445	6.17654e-06	8.8071e-05
Vgf	VGF nerve growth factor inducible	0.396288	8.88778	0.00225138	0.00955766
Mir9-2	microRNA 9-2	0.395793	-0.721157	0.00668517	0.0228007
C920021L13Rik	RIKEN cDNA C920021L13 gene	0.394304	-0.483913	0.0130268	0.0391447
Hmgb3	high mobility group box 3	0.39319	5.95303	0.00158326	0.00720816
Cd302	CD302 antigen	0.393182	2.97538	5.81049e-08	2.6599e-06
Diras2	DIRAS family, GTP-binding RAS-like 2	0.391458	6.50588	4.40902e-10	5.54241e-08
Rpl41	ribosomal protein L41	0.390727	6.9534	9.04225e-09	6.39376e-07
Lyz2	lysozyme 2	0.390451	1.34776	0.00567197	0.020013
Adamts8	a disintegrin-like and metallopeptidase (reprolysin type) with thrombospondin type 1 motif, 8	0.390064	1.51189	0.00150854	0.00692878
Cnksr2	connector enhancer of kinase suppressor of Ras 2	0.388855	6.3214	9.48952e-05	0.000773569
Tor4a	torsin family 4, member A	0.388062	0.776937	0.00558736	0.0197894
Riiad1	regulatory subunit of type II PKA R-subunit (RIIa) domain containing 1	0.386318	2.61381	0.000197837	0.00136182
Col25a1	collagen, type XXV, alpha 1	0.384777	7.55025	1.37223e-06	2.71346e-05
Lrrc10b	leucine rich repeat containing 10B	0.383455	3.02194	9.88509e-05	0.000794726
Nab1	Ngfi-A binding protein 1	0.383258	5.15196	1.09995e-14	7.12977e-12
Lef1	lymphoid enhancer binding factor 1	0.382898	0.539869	0.0138973	0.0412385
Trim36	tripartite motif-containing 36	0.381729	2.71309	2.86823e-07	8.47572e-06
Smim18	small integral membrane protein 18	0.381639	3.20049	2.66381e-09	2.43885e-07
Proser2	proline and serine rich 2	0.380824	1.54821	0.000468471	0.00270708
Sema3e	sema domain, immunoglobulin domain (Ig), short basic domain, secreted, (semaphorin) 3E	0.380768	4.69218	0.0173556	0.0490271
Apold1	apolipoprotein L domain containing 1	0.38033	1.31312	0.000279136	0.00178708
Tfpi	tissue factor pathway inhibitor	0.380195	1.33498	0.000727416	0.00385981
Igfbpl1	insulin-like growth factor binding protein-like 1	0.379637	2.05624	0.0008376	0.00434406
Ccdc122	coiled-coil domain containing 122	0.379585	1.1643	9.59236e-05	0.000778635
Erich6	glutamate rich 6	0.379507	-0.195633	0.0154781	0.0449582
2900005J15Rik	RIKEN cDNA 2900005J15 gene	0.379431	0.700766	0.00861116	0.0279607
Ccdc79	NA	0.379389	0.313073	0.00525905	0.0188083
Uqcrb	ubiquinol-cytochrome c reductase binding protein	0.37895	5.67295	4.50038e-09	3.73202e-07
Crhbp	corticotropin releasing hormone binding protein	0.377981	1.81336	0.0144326	0.0425104
Hspb11	heat shock protein family B (small), member 11	0.377769	3.14122	1.29824e-08	8.25814e-07
Gm29683	predicted gene, 29683	0.377752	1.87038	3.49656e-05	0.000351055
Zfp97	zinc finger protein 97	0.377739	2.60858	0.000520203	0.00294564
Rab40b	Rab40B, member RAS oncogene family	0.376446	3.84527	6.50539e-07	1.57311e-05
Snrpg	small nuclear ribonucleoprotein polypeptide G	0.376359	3.2529	1.78741e-06	3.30073e-05
Rasef	RAS and EF hand domain containing	0.376002	-0.289797	0.0102433	0.032268
Krt10	keratin 10	0.375856	2.44777	8.25262e-07	1.8561e-05
E030003E18Rik	RIKEN cDNA E030003E18 gene	0.374721	2.25237	0.00591477	0.0206575
1110020A21Rik	RIKEN cDNA 1110020A21 gene	0.374655	-0.523125	0.0082156	0.0268968
Cav2	caveolin 2	0.373575	3.91663	4.11671e-06	6.44951e-05
Gm20939	predicted gene, 20939	0.372671	0.441252	0.00550169	0.019534
6720489N17Rik	RIKEN cDNA 6720489N17 gene	0.372205	2.35521	1.14452e-06	2.39272e-05
Itm2a	integral membrane protein 2A	0.371325	4.81822	1.33289e-06	2.66225e-05
Zfp960	zinc finger protein 960	0.370903	2.602	1.82822e-06	3.35541e-05
BC002163	NA	0.370269	0.993305	0.000376737	0.00228189
Lrrk2	leucine-rich repeat kinase 2	0.369559	4.52685	1.07105e-10	1.66966e-08
Dpp4	dipeptidylpeptidase 4	0.368083	1.63831	0.00132033	0.00625382
Kazald1	Kazal-type serine peptidase inhibitor domain 1	0.36797	1.55522	0.00264582	0.0109048
Rpl37rt	ribosomal protein L37, retrotransposed	0.367544	1.04159	3.44304e-05	0.00034669
Myo5b	myosin VB	0.366781	2.3975	0.014867	0.0434715
Zfp750	zinc finger protein 750	0.366701	0.793318	0.00264419	0.0109009
Irgm1	immunity-related GTPase family M member 1	0.366271	3.18305	4.25143e-07	1.14133e-05
Zfp867	zinc finger protein 867	0.365228	3.29286	2.32512e-07	7.33617e-06
Gpc6	glypican 6	0.364644	4.16615	1.48266e-06	2.86388e-05
Btg2	BTG anti-proliferation factor 2	0.364004	4.07322	3.20483e-05	0.000326439
Gng13	guanine nucleotide binding protein (G protein), gamma 13	0.363844	1.22213	0.0101779	0.0320939
A330102I10Rik	RIKEN cDNA A330102I10 gene	0.363335	1.0772	0.000560239	0.00312318
Adgrl4	adhesion G protein-coupled receptor L4	0.363221	2.61173	0.000757952	0.00399109
Mpped2	metallophosphoesterase domain containing 2	0.362006	4.39569	4.78199e-08	2.30219e-06
Perp	PERP, TP53 apoptosis effector	0.361553	1.50101	0.000129316	0.000984254
Eya2	EYA transcriptional coactivator and phosphatase 2	0.361071	0.545839	0.00750035	0.0249996
Ppp1r3b	protein phosphatase 1, regulatory subunit 3B	0.360699	0.300023	0.00388056	0.0148937
Fam111a	family with sequence similarity 111, member A	0.359728	0.860213	0.00098713	0.00494784
Anapc13	anaphase promoting complex subunit 13	0.359531	5.00243	1.35321e-08	8.57343e-07
Gm561	NA	0.35919	3.52447	8.42006e-07	1.88103e-05
L3mbtl4	L3MBTL4 histone methyl-lysine binding protein	0.358578	-0.527207	0.00714013	0.0240213
Plcd4	phospholipase C, delta 4	0.35704	5.67907	2.74525e-08	1.50979e-06
Gm3696	predicted gene 3696	0.356264	-0.619788	0.0127415	0.0385285
2810049E08Rik	RIKEN cDNA 2810049E08 gene	0.355466	-0.0551066	0.0216488	0.0583682
Cdhr1	cadherin-related family member 1	0.354851	0.789607	0.0147885	0.0432966
Tnfrsf11a	tumor necrosis factor receptor superfamily, member 11a, NFKB activator	0.354285	1.40204	0.000121335	0.000935196
Cmbl	carboxymethylenebutenolidase-like (Pseudomonas)	0.350889	4.30698	2.82191e-07	8.35445e-06
Slirp	SRA stem-loop interacting RNA binding protein	0.350582	4.19139	1.32897e-07	4.96453e-06
Eif2ak2	eukaryotic translation initiation factor 2-alpha kinase 2	0.350166	3.50552	3.75108e-08	1.91656e-06
Rpl37	ribosomal protein L37	0.348165	7.27457	4.75962e-07	1.24608e-05
Zfp934	zinc finger protein 934	0.347628	2.49044	4.71641e-06	7.10107e-05
Slc22a8	solute carrier family 22 (organic anion transporter), member 8	0.347234	2.22343	0.000865316	0.00444992
Fibin	fin bud initiation factor homolog (zebrafish)	0.346839	1.5565	0.00291268	0.0117869
Prkaa2	protein kinase, AMP-activated, alpha 2 catalytic subunit	0.346065	5.74038	3.01674e-05	0.000310072
Bhlhe22	basic helix-loop-helix family, member e22	0.345904	2.38223	0.00117279	0.0056894
Rpa3	replication protein A3	0.345733	2.74894	4.34522e-06	6.65609e-05
Hs3st3b1	heparan sulfate (glucosamine) 3-O-sulfotransferase 3B1	0.344771	1.64136	0.00200322	0.00869524
Snrpe	small nuclear ribonucleoprotein E	0.344357	3.93476	1.23781e-06	2.52736e-05
Emcn	endomucin	0.34434	0.711655	0.00899626	0.0290148
Gda	guanine deaminase	0.344184	8.22371	4.88076e-07	1.27358e-05
B630019K06Rik	F-box and leucine-rich repeat protein 17 pseudogene	0.34398	8.13828	5.27848e-13	1.94432e-10
Tox3	TOX high mobility group box family member 3	0.343851	5.23737	1.48348e-07	5.36457e-06
Camk2n1	calcium/calmodulin-dependent protein kinase II inhibitor 1	0.343808	8.23606	1.4507e-06	2.8228e-05
Tomm7	translocase of outer mitochondrial membrane 7	0.343084	4.35357	1.00358e-06	2.16267e-05
Npsr1	neuropeptide S receptor 1	0.342972	1.30031	0.00692536	0.0234332
Abracl	ABRA C-terminal like	0.341656	1.48875	8.14972e-05	0.000684067
3110035E14Rik	NA	0.341471	5.30417	0.00016883	0.00121219
Crip1	cysteine-rich protein 1 (intestinal)	0.339987	0.715825	0.0108237	0.0337142
Cox7b	cytochrome c oxidase subunit 7B	0.339667	6.29841	1.26847e-07	4.77227e-06
Zfp959	zinc finger protein 959	0.339632	2.14753	5.56027e-07	1.40911e-05
Rps24	ribosomal protein S24	0.339521	8.04931	2.0933e-07	6.86456e-06
E230016M11Rik	RIKEN cDNA E230016M11 gene	0.339324	0.676064	0.00102778	0.00511595
Atp5e	ATP synthase, H transporting, mitochondrial F1 complex, epsilon subunit	0.339227	5.57794	6.34394e-07	1.54946e-05
Ccdc18	coiled-coil domain containing 18	0.338604	0.157639	0.00797909	0.0262473
Pvr	poliovirus receptor	0.338459	2.28993	1.65651e-05	0.000193064
Cox7c	cytochrome c oxidase subunit 7C	0.338227	6.46118	7.35409e-07	1.72055e-05
Mettl24	methyltransferase like 24	0.337657	-0.208619	0.0128534	0.0387634
Polr2k	polymerase (RNA) II (DNA directed) polypeptide K	0.337501	3.49702	2.29098e-06	4.02292e-05
Fras1	Fraser extracellular matrix complex subunit 1	0.337411	2.90141	0.0001566	0.00114251
Rpl35	ribosomal protein L35	0.33697	6.78758	5.50002e-08	2.5622e-06
Rpl31	ribosomal protein L31	0.336948	7.62864	3.57481e-09	3.07725e-07
Cd34	CD34 antigen	0.335758	3.1597	4.97003e-05	0.000464427
Col19a1	collagen, type XIX, alpha 1	0.335704	0.956735	0.0168435	0.0479915
Npy1r	neuropeptide Y receptor Y1	0.335547	4.33744	9.7272e-05	0.000787031
Man2a1	mannosidase 2, alpha 1	0.334817	3.93743	2.13064e-05	0.000234506
Slco1a4	solute carrier organic anion transporter family, member 1a4	0.334802	4.014	0.000104373	0.000828241
Rps27l	ribosomal protein S27-like	0.334637	3.24445	5.03911e-05	0.00046867
A830080D01Rik	NA	0.334145	4.10101	5.99191e-08	2.70387e-06
Fam162a	family with sequence similarity 162, member A	0.333897	4.84482	1.0539e-06	2.24063e-05
Mrps33	mitochondrial ribosomal protein S33	0.33368	4.98213	1.43816e-08	9.00359e-07
Glra4	glycine receptor, alpha 4 subunit	0.333199	1.26193	0.00391115	0.0149671
Adgrg2	adhesion G protein-coupled receptor G2	0.33225	3.18705	6.37674e-06	9.04218e-05
Fezf2	Fez family zinc finger 2	0.332069	1.60054	0.00978498	0.0311213
1810022K09Rik	NA	0.331972	4.19484	2.06337e-06	3.72653e-05
Nupr1	nuclear protein transcription regulator 1	0.331958	0.354065	0.0209868	0.0569903
Ap1s3	adaptor-related protein complex AP-1, sigma 3	0.33166	1.48248	0.0011111	0.00545356
Inhbb	inhibin beta-B	0.331656	3.41824	1.79919e-05	0.000205899
Rpl36a	ribosomal protein L36A	0.330904	6.33224	1.5335e-07	5.47052e-06
Mthfd2	methylenetetrahydrofolate dehydrogenase (NAD dependent), methenyltetrahydrofolate cyclohydrolase	0.33029	4.40629	8.48376e-08	3.53617e-06
Qrfpr	pyroglutamylated RFamide peptide receptor	0.330209	2.97595	0.000862257	0.00443851
Zfp119b	zinc finger protein 119b	0.330191	2.07616	4.00579e-06	6.3195e-05
2900052N01Rik	RIKEN cDNA 2900052N01 gene	0.328907	6.00606	0.000480762	0.00276098
Gm11837	predicted gene 11837	0.328862	1.33955	0.00626822	0.0216113
Car14	carbonic anhydrase 14	0.328835	2.78438	0.00326861	0.0129623
Fam212b	NA	0.328657	3.29987	0.00665834	0.0227288
E2f1	E2F transcription factor 1	0.327298	0.514118	0.0146954	0.0431039
Cox6c	cytochrome c oxidase subunit 6C	0.327151	6.54726	2.30411e-05	0.000249793
Mrpl41	mitochondrial ribosomal protein L41	0.327098	5.67223	8.03909e-09	5.77499e-07
Tuft1	tuftelin 1	0.326373	3.16219	0.000662339	0.0035866
Rps25	ribosomal protein S25	0.325741	7.58229	1.08158e-07	4.21951e-06
Rpl36al	ribosomal protein L36A-like	0.325183	5.84029	4.48923e-07	1.19104e-05
Ppp1r3g	protein phosphatase 1, regulatory subunit 3G	0.325065	0.855378	0.0193968	0.0535702
Igtp	interferon gamma induced GTPase	0.324835	2.35571	0.00191796	0.00841263
Gadd45b	growth arrest and DNA-damage-inducible 45 beta	0.324656	2.38006	0.00581083	0.0204075
Snapc5	small nuclear RNA activating complex, polypeptide 5	0.324452	4.17708	9.82348e-07	2.13261e-05
Gpr101	G protein-coupled receptor 101	0.324429	7.22808	6.12098e-05	0.000544358
C230035I16Rik	RIKEN cDNA C230035I16 gene	0.324246	-0.337992	0.0147857	0.0432964
Snhg6	small nucleolar RNA host gene 6	0.323798	1.72132	0.000285042	0.00181754
Elovl7	ELOVL family member 7, elongation of long chain fatty acids (yeast)	0.323336	3.58666	0.000864642	0.00444789
Nr4a1	nuclear receptor subfamily 4, group A, member 1	0.323331	3.86834	0.0202461	0.0553947
Thsd7a	thrombospondin, type I, domain containing 7A	0.323305	6.0061	4.08858e-09	3.44463e-07
B2m	beta-2 microglobulin	0.322584	5.81239	2.14354e-06	3.83633e-05
Pcdh19	protocadherin 19	0.322577	7.41712	2.16376e-10	2.91677e-08
Stmn1	stathmin 1	0.322572	8.75966	1.47554e-10	2.12464e-08
C1galt1c1	C1GALT1-specific chaperone 1	0.322424	5.03582	9.25165e-08	3.79629e-06
Net1	neuroepithelial cell transforming gene 1	0.320686	3.37483	2.26462e-05	0.000246186
1700001G17Rik	RIKEN cDNA 1700001G17 gene	0.320509	-0.0303661	0.0129924	0.0390488
Btc	betacellulin, epidermal growth factor family member	0.320138	0.630476	0.0191813	0.0531233
Gm12338	cytochrome c oxidase, subunit VIIc pseudogene	0.320128	1.18122	9.21254e-05	0.000756786
Gm3435	predicted gene 3435	0.320045	-0.240741	0.015453	0.0448936
Rab27b	RAB27B, member RAS oncogene family	0.319964	6.62166	2.80488e-11	5.3526e-09
Ndufa4	Ndufa4, mitochondrial complex associated	0.319926	6.8474	5.16841e-07	1.3311e-05
Cdc14a	CDC14 cell division cycle 14A	0.319779	5.08849	0.0033547	0.0132374
Gm5141	predicted gene 5141	0.319665	2.59553	1.78801e-06	3.30073e-05
Zic3	zinc finger protein of the cerebellum 3	0.319622	3.96121	0.0194602	0.0537079
Cbfa2t3	CBFA2/RUNX1 translocation partner 3	0.319431	2.04779	0.00114406	0.00557562
Arhgap6	Rho GTPase activating protein 6	0.319146	6.53784	8.76051e-07	1.94339e-05
Klf10	Kruppel-like factor 10	0.318715	2.25743	0.000346344	0.00213453
Crhr1	corticotropin releasing hormone receptor 1	0.318563	2.27358	4.61325e-05	0.00043794
Gstm2	glutathione S-transferase, mu 2	0.317331	0.303593	0.0199165	0.0546911
Fign	fidgetin	0.316986	2.20958	0.00161696	0.00733001
Pou2f2	POU domain, class 2, transcription factor 2	0.316933	4.98985	0.000105988	0.000838536
Snx25	sorting nexin 25	0.316445	6.86568	1.33333e-07	4.96908e-06
C030023E24Rik	RIKEN cDNA C030023E24 gene	0.316189	2.0167	0.0196375	0.0540655
Crhr2	corticotropin releasing hormone receptor 2	0.315862	2.22928	0.00214764	0.00921355
Ggct	gamma-glutamyl cyclotransferase	0.314974	3.96829	6.56762e-08	2.90016e-06
Slc26a2	solute carrier family 26 (sulfate transporter), member 2	0.314672	2.63981	0.000109649	0.000858918
4933412E12Rik	RIKEN cDNA 4933412E12 gene	0.314658	1.23659	0.00174309	0.00780128
Ube2d1	ubiquitin-conjugating enzyme E2D 1	0.314541	5.4073	2.2133e-07	7.09646e-06
Zfp677	zinc finger protein 677	0.3136	2.45132	2.28745e-05	0.000248327
Ism1	isthmin 1, angiogenesis inhibitor	0.313573	1.42675	0.000166165	0.00119904
Trmt11	tRNA methyltransferase 11	0.313378	2.72227	8.34514e-06	0.000111168
Nat1	N-acetyl transferase 1	0.313065	0.830945	0.00146083	0.00675977
Tmem256	transmembrane protein 256	0.312379	3.57126	1.07989e-05	0.000136725
A2m	alpha-2-macroglobulin	0.312314	3.01225	0.0108631	0.0338037
Prr11	proline rich 11	0.312117	0.608408	0.00848372	0.0276262
Snhg3	small nucleolar RNA host gene 3	0.311699	1.61422	0.000885546	0.00452895
Fam163a	family with sequence similarity 163, member A	0.311602	0.851991	0.0196491	0.0540878
Rassf6	Ras association (RalGDS/AF-6) domain family member 6	0.310438	0.395958	0.0131655	0.0394703
Metap1d	methionyl aminopeptidase type 1D (mitochondrial)	0.310407	3.7581	6.03038e-05	0.000538114
Camk1d	calcium/calmodulin-dependent protein kinase ID	0.309603	6.3445	2.13271e-07	6.96496e-06
Tmem258	transmembrane protein 258	0.309208	3.8044	1.6358e-06	3.08446e-05
Pmaip1	phorbol-12-myristate-13-acetate-induced protein 1	0.308955	2.17517	0.00924627	0.0296701
5330426P16Rik	NA	0.308898	2.25163	0.00770272	0.025497
Epn3	epsin 3	0.308285	1.27101	0.00988649	0.0313686
C4b	complement component 4B (Chido blood group)	0.308153	5.96662	0.00703434	0.023736
Fli1	Friend leukemia integration 1	0.308138	1.01648	0.004393	0.0164204
Lin7a	lin-7 homolog A, crumbs cell polarity complex component	0.307738	6.54214	3.54417e-08	1.85267e-06
Prkch	protein kinase C, eta	0.307615	1.97762	0.00561571	0.0198676
Nrp1	neuropilin 1	0.307479	5.96122	6.74272e-08	2.95022e-06
Map3k5	mitogen-activated protein kinase kinase kinase 5	0.307478	6.20338	7.47594e-05	0.000641796
Rpl37a	ribosomal protein L37a	0.307358	7.21591	1.64698e-06	3.10034e-05
Shroom4	shroom family member 4	0.307184	0.730788	0.0036341	0.0141496
Slco1c1	solute carrier organic anion transporter family, member 1c1	0.307019	3.87035	0.000154015	0.00112989
Tex15	testis expressed gene 15	0.306989	1.19833	0.0188131	0.052305
Ndufc1	NADH:ubiquinone oxidoreductase subunit C1	0.305764	4.51308	3.49276e-06	5.66822e-05
Stxbp6	syntaxin binding protein 6 (amisyn)	0.305589	4.1727	0.000750157	0.00395926
A730020E08Rik	RIKEN cDNA A730020E08 gene	0.305479	1.44012	0.000226294	0.00151683
Erich2	glutamate rich 2	0.305178	1.41825	0.00429045	0.0161187
Irgm2	immunity-related GTPase family M member 2	0.304137	1.91535	0.00701679	0.0236919
Gfap	glial fibrillary acidic protein	0.303767	8.34567	0.00568303	0.0200342
Rpl32	ribosomal protein L32	0.30369	6.982	2.50186e-07	7.78525e-06
Tbca	tubulin cofactor A	0.303678	6.03509	1.57571e-05	0.000184598
Nmi	N-myc (and STAT) interactor	0.303539	2.23312	0.000137643	0.00103228
Mef2c	myocyte enhancer factor 2C	0.303453	5.69402	0.000867224	0.00445106
Rmst	rhabdomyosarcoma 2 associated transcript (non-coding RNA)	0.302668	2.95291	0.000194563	0.00134336
Atp5l	ATP synthase, H transporting, mitochondrial F0 complex, subunit G	0.302265	5.7674	2.29741e-06	4.0253e-05
Uqcrh	ubiquinol-cytochrome c reductase hinge protein	0.30218	6.42424	2.62354e-07	7.9912e-06
Hapln1	hyaluronan and proteoglycan link protein 1	0.301841	2.11407	0.000602245	0.00331905
Agtr1a	angiotensin II receptor, type 1a	0.300511	2.64817	8.258e-05	0.000690229
Pm20d2	peptidase M20 domain containing 2	0.300447	5.03393	2.07943e-06	3.75126e-05
Nabp1	nucleic acid binding protein 1	0.300337	3.07084	1.21662e-06	2.50912e-05
Dbi	diazepam binding inhibitor	0.300277	7.14593	4.04941e-05	0.000395429
Ndufa1	NADH:ubiquinone oxidoreductase subunit A1	0.299567	4.60615	1.45516e-06	2.82454e-05
Ammecr1	Alport syndrome, mental retardation, midface hypoplasia and elliptocytosis chromosomal region gene 1	0.29904	2.507	0.00065316	0.00354295
Rps20	ribosomal protein S20	0.297461	6.04405	4.42767e-08	2.18473e-06
1500012F01Rik	NA	0.296746	4.06054	0.000976377	0.00490524
Fndc9	fibronectin type III domain containing 9	0.296707	5.83444	0.00456495	0.0168856
Slc40a1	solute carrier family 40 (iron-regulated transporter), member 1	0.296323	2.31244	3.72211e-05	0.000368927
Tcf7	transcription factor 7, T cell specific	0.296098	0.454486	0.0140942	0.0416957
Mllt3	myeloid/lymphoid or mixed-lineage leukemia; translocated to, 3	0.296071	5.85647	5.28505e-08	2.49136e-06
Med9os	mediator complex subunit 9, opposite strand	0.295735	0.576598	0.0132403	0.0396582
Cacng3	calcium channel, voltage-dependent, gamma subunit 3	0.295513	3.5636	0.000541357	0.00303846
Gpr3	G-protein coupled receptor 3	0.294852	1.20345	0.00345503	0.0135456
Dio2	deiodinase, iodothyronine, type II	0.294675	2.54485	0.00564269	0.0199408
Pkib	protein kinase inhibitor beta, cAMP dependent, testis specific	0.294137	5.71576	0.00316362	0.0126186
Krcc1	lysine-rich coiled-coil 1	0.293963	4.49623	1.26478e-06	2.57224e-05
Chek1	checkpoint kinase 1	0.293846	0.63244	0.000892192	0.0045524
Pttg1	pituitary tumor-transforming gene 1	0.293756	4.00462	0.00720244	0.0241872
Ndufa5	NADH:ubiquinone oxidoreductase subunit A5	0.292762	5.31087	1.28592e-05	0.000156916
Pla2g4a	phospholipase A2, group IVA (cytosolic, calcium-dependent)	0.292357	0.985207	0.0175092	0.0493729
Rps23	ribosomal protein S23	0.292356	7.56531	2.99379e-06	5.02024e-05
Tmem243	transmembrane protein 243, mitochondrial	0.292241	2.65013	1.78119e-06	3.29583e-05
Faap24	Fanconi anemia core complex associated protein 24	0.292036	1.77228	0.000133741	0.00101017
Clec1a	C-type lectin domain family 1, member a	0.291091	-0.391243	0.020155	0.0552024
Smim8	small integral membrane protein 8	0.291063	3.28813	1.12226e-05	0.000141075
Arpp21	cyclic AMP-regulated phosphoprotein, 21	0.290987	5.44686	0.00497962	0.0180527
Dynlt3	dynein light chain Tctex-type 3	0.290584	6.75107	1.6377e-12	5.63903e-10
Mt2	metallothionein 2	0.29024	6.24979	0.0077789	0.0257063
Tceal8	transcription elongation factor A (SII)-like 8	0.289932	5.69454	2.88433e-07	8.49532e-06
Slfn5	schlafen 5	0.289641	1.56628	0.00419624	0.0158361
Atp8b1	ATPase, class I, type 8B, member 1	0.289512	0.386634	0.0217574	0.0585781
Pigp	phosphatidylinositol glycan anchor biosynthesis, class P	0.289397	4.90269	4.19746e-08	2.09728e-06
Kctd12b	potassium channel tetramerisation domain containing 12b	0.289024	3.6718	9.32483e-05	0.000763286
Msn	moesin	0.288993	5.36986	6.37249e-07	1.55249e-05
Trim13	tripartite motif-containing 13	0.288857	3.42908	1.47319e-06	2.84906e-05
Zfp808	zinc finger protein 808	0.287784	1.31564	0.00487223	0.017765
Tcf12	transcription factor 12	0.287776	6.57331	4.31524e-06	6.62695e-05
Cox17	cytochrome c oxidase assembly protein 17, copper chaperone	0.287636	5.39924	1.01795e-06	2.1877e-05
AW551984	expressed sequence AW551984	0.286405	8.30147	7.62818e-12	1.99692e-09
Medag	mesenteric estrogen dependent adipogenesis	0.285892	2.52688	0.00262817	0.0108518
E130012A19Rik	NA	0.285012	1.54602	0.0217629	0.0585801
Tpt1	tumor protein, translationally-controlled 1	0.284953	8.29309	3.26983e-09	2.90067e-07
Pcsk1	proprotein convertase subtilisin/kexin type 1	0.284847	5.84246	0.000526249	0.00296946
Camk4	calcium/calmodulin-dependent protein kinase IV	0.284828	5.45672	0.000663255	0.00359033
Mitf	melanogenesis associated transcription factor	0.284704	2.07126	0.000777629	0.00407979
Megf10	multiple EGF-like-domains 10	0.284016	5.39612	8.97417e-05	0.000739168
Rorb	RAR-related orphan receptor beta	0.283773	6.81159	0.00432811	0.0162294
Gng4	guanine nucleotide binding protein (G protein), gamma 4	0.283707	6.78631	2.66191e-11	5.20519e-09
Gpr12	G-protein coupled receptor 12	0.282178	2.76817	0.000220574	0.00148414
Pdcd10	programmed cell death 10	0.281641	5.42704	4.42318e-08	2.18473e-06
Apoc1	apolipoprotein C-I	0.28146	1.74549	0.0157235	0.0455124
Ptpn3	protein tyrosine phosphatase, non-receptor type 3	0.280316	4.11112	0.000738887	0.0039102
P2ry12	purinergic receptor P2Y, G-protein coupled 12	0.280062	4.5578	2.59502e-05	0.000274673
Pcdh18	protocadherin 18	0.279861	4.31573	0.00183913	0.00814597
Susd1	sushi domain containing 1	0.2797	5.19945	0.0120347	0.0367561
Mei4	meiotic double-stranded break formation protein 4	0.279275	0.692281	0.00667696	0.022778
Med21	mediator complex subunit 21	0.279216	4.38395	7.36578e-08	3.149e-06
Eps15	epidermal growth factor receptor pathway substrate 15	0.278621	7.63242	2.80974e-10	3.67797e-08
St8sia2	ST8 alpha-N-acetyl-neuraminide alpha-2,8-sialyltransferase 2	0.278342	4.95986	0.00247398	0.010331
Plcl1	phospholipase C-like 1	0.278117	6.36668	5.10169e-10	6.16837e-08
Plk2	polo like kinase 2	0.278001	5.77237	0.00311837	0.0124569
Hrsp12	NA	0.27794	6.14004	2.43285e-06	4.22058e-05
Myeov2	NA	0.277185	4.74349	1.79677e-05	0.000205778
Slc25a40	solute carrier family 25, member 40	0.277069	3.95411	5.69553e-08	2.62243e-06
Arhgef28	Rho guanine nucleotide exchange factor (GEF) 28	0.277029	5.17765	3.70558e-08	1.91656e-06
A630066F11Rik	RIKEN cDNA A630066F11 gene	0.27674	0.341209	0.0141689	0.0418697
Tmem100	transmembrane protein 100	0.276466	3.5871	9.72919e-05	0.000787031
Efhc2	EF-hand domain (C-terminal) containing 2	0.276452	1.86149	0.000483121	0.00277252
Zbed5	zinc finger, BED type containing 5	0.276193	3.35683	2.76522e-07	8.26352e-06
Gm10548	ribosomal protein L29 pseudogene	0.276055	0.102059	0.0213072	0.05766
Gm16701	predicted gene, 16701	0.275349	1.64204	0.000392139	0.00235268
Hps3	HPS3, biogenesis of lysosomal organelles complex 2 subunit 1	0.275329	4.19356	2.43949e-08	1.37506e-06
Fhod3	formin homology 2 domain containing 3	0.274425	6.45047	1.42723e-05	0.000170998
Mrpl32	mitochondrial ribosomal protein L32	0.274091	3.9677	1.56128e-07	5.51988e-06
Cenpq	centromere protein Q	0.273762	1.9872	0.000230026	0.00153535
Scara3	scavenger receptor class A, member 3	0.273455	3.22202	0.000488272	0.00279398
Crem	cAMP responsive element modulator	0.272874	3.96026	0.000154409	0.00113212
Lyplal1	lysophospholipase-like 1	0.272617	2.54036	0.000421714	0.00249143
2500004C02Rik	RIKEN cDNA 2500004C02 gene	0.272427	2.61569	1.94253e-05	0.000218211
Kiz	kizuna centrosomal protein	0.271556	5.34622	1.28653e-08	8.24874e-07
Brca1	breast cancer 1, early onset	0.271478	1.12221	0.00132875	0.00628243
Peak1	pseudopodium-enriched atypical kinase 1	0.271367	4.94632	1.93638e-06	3.52232e-05
Acyp2	acylphosphatase 2, muscle type	0.271221	4.31127	6.6716e-07	1.60108e-05
Alox8	arachidonate 8-lipoxygenase	0.270883	1.08626	0.0132584	0.0396975
Mctp1	multiple C2 domains, transmembrane 1	0.270833	4.05373	0.000293499	0.00186248
2210404O09Rik	NA	0.270616	2.52242	4.28822e-05	0.000413674
D3Ertd751e	DNA segment, Chr 3, ERATO Doi 751, expressed	0.270463	5.36729	3.01902e-08	1.62647e-06
Prorsd1	prolyl-tRNA synthetase domain containing 1	0.270416	2.84446	0.000213447	0.00144973
A330048O09Rik	RIKEN cDNA A330048O09 gene	0.270193	1.13567	0.017657	0.0497189
Gm7694	predicted gene 7694	0.270152	3.46351	0.020204	0.0553078
Rhoj	ras homolog family member J	0.27014	1.69581	0.000936162	0.00474216
Cd59a	CD59a antigen	0.269414	4.11411	0.000178513	0.00126101
Sdhaf4	succinate dehydrogenase complex assembly factor 4	0.269343	4.4896	2.56201e-06	4.40127e-05
D430020J02Rik	RIKEN cDNA D430020J02 gene	0.268854	2.22932	0.000187715	0.00130748
Ifitm2	interferon induced transmembrane protein 2	0.268621	1.13525	0.0131889	0.0395268
Mir682	microRNA 682	0.268247	0.589275	0.0043264	0.0162294
Rps27a	ribosomal protein S27A	0.268048	7.76044	2.58754e-06	4.43551e-05
Gm3414	predicted gene 3414	0.268002	1.88824	0.00406221	0.0154221
Lhfp	lipoma HMGIC fusion partner	0.267817	5.3115	2.19358e-07	7.05442e-06
Atp13a5	ATPase type 13A5	0.267617	2.77148	0.00100158	0.00501075
Gldc	glycine decarboxylase	0.267604	3.81417	0.000155158	0.00113565
S100a13	S100 calcium binding protein A13	0.267562	2.63312	0.00143801	0.0066774
Dgki	diacylglycerol kinase, iota	0.267202	4.55489	0.00523082	0.0187276
Angpt1	angiopoietin 1	0.267188	3.77245	9.42936e-05	0.000770648
Mtfr1	mitochondrial fission regulator 1	0.267088	4.09808	3.20239e-06	5.28361e-05
Spa17	sperm autoantigenic protein 17	0.267021	3.05716	0.000936217	0.00474216
Gm973	predicted gene 973	0.266554	5.68031	0.000101423	0.000810925
Lyrm2	LYR motif containing 2	0.266263	4.6794	1.53103e-07	5.47052e-06
Pik3r3	phosphoinositide-3-kinase regulatory subunit 3	0.266163	7.28053	0.000390314	0.00234618
Immp1l	IMP1 inner mitochondrial membrane peptidase-like (S. cerevisiae)	0.265558	4.26783	6.55994e-06	9.23581e-05
Kir3dl2	killer cell immunoglobulin-like receptor, three domains, long cytoplasmic tail, 2	0.265264	0.530659	0.021868	0.058776
Decr1	2,4-dienoyl CoA reductase 1, mitochondrial	0.265101	4.43847	9.30139e-08	3.80684e-06
Nkain2	Naﲯ transporting ATPase interacting 2	0.264803	4.43071	0.000173351	0.00123536
Rps17	ribosomal protein S17	0.264534	7.37038	5.39119e-07	1.3745e-05
Mycbp	MYC binding protein	0.264529	2.89535	4.01559e-05	0.000392369
Ubl5	ubiquitin-like 5	0.264406	6.11185	2.6918e-06	4.5993e-05
Gm3604	predicted gene 3604	0.263542	1.26521	0.00655065	0.0223998
Hspe1	heat shock protein 1 (chaperonin 10)	0.263437	6.21647	4.11263e-05	0.000399631
Rpl14-ps1	ribosomal protein L14, pseudogene 1	0.263268	1.71884	7.53369e-05	0.000644871
Tnfrsf19	tumor necrosis factor receptor superfamily, member 19	0.262776	4.25279	4.37312e-05	0.000419793
Pinx1	PIN2/TERF1 interacting, telomerase inhibitor 1	0.262225	2.42781	0.000402182	0.0023984
Mrps18c	mitochondrial ribosomal protein S18C	0.262111	4.87746	5.35386e-05	0.000491023
Fcrls	Fc receptor-like S, scavenger receptor	0.261936	3.27729	0.00471019	0.0173016
Spata6	spermatogenesis associated 6	0.261837	3.01845	0.0013349	0.00630586
Atp5j2	ATP synthase, H transporting, mitochondrial F0 complex, subunit F2	0.261541	6.69654	2.85113e-06	4.82469e-05
Phf6	PHD finger protein 6	0.260744	5.41186	5.93814e-08	2.70271e-06
Xlr3a	X-linked lymphocyte-regulated 3A	0.259586	2.35563	0.0160301	0.0462564
Mrpl33	mitochondrial ribosomal protein L33	0.258952	4.22826	1.24476e-05	0.000153191
Gt(ROSA)26Sor	gene trap ROSA 26, Philippe Soriano	0.258612	2.83482	0.000120498	0.000930552
Rmdn2	regulator of microtubule dynamics 2	0.258436	3.28312	5.86449e-07	1.47207e-05
Tifa	TRAF-interacting protein with forkhead-associated domain	0.258335	2.88561	0.000232422	0.00154678
Lipo1	lipase, member O1	0.258335	3.87788	2.27006e-07	7.21997e-06
Zfp85	zinc finger protein 85	0.258068	2.65998	1.67884e-05	0.00019495
Taf13	TATA-box binding protein associated factor 13	0.257862	5.39575	1.18093e-08	7.79365e-07
Apool	apolipoprotein O-like	0.25776	2.47433	0.000519273	0.00294162
Spcs3	signal peptidase complex subunit 3 homolog (S. cerevisiae)	0.257112	6.24675	9.30103e-12	2.37611e-09
2810001G20Rik	RIKEN cDNA 2810001G20 gene	0.256933	3.61565	1.7064e-07	5.92713e-06
Gsta4	glutathione S-transferase, alpha 4	0.256617	6.21376	6.87936e-09	5.1156e-07
2900092D14Rik	RIKEN cDNA 2900092D14 gene	0.256483	1.96295	0.00238049	0.0099906
Cntn4	contactin 4	0.256412	4.91311	7.51077e-05	0.000643392
Rgs20	regulator of G-protein signaling 20	0.256184	4.39063	7.78611e-08	3.30628e-06
Uqcr10	ubiquinol-cytochrome c reductase, complex III subunit X	0.255795	5.4576	1.37842e-06	2.7189e-05
Tmtc1	transmembrane and tetratricopeptide repeat containing 1	0.255637	6.77169	1.51099e-09	1.59551e-07
Cx3cr1	chemokine (C-X3-C motif) receptor 1	0.25533	5.31991	0.000822413	0.00428212
Vav3	vav 3 oncogene	0.255116	3.48753	0.00630593	0.0217224
Tipin	timeless interacting protein	0.254982	4.28941	0.000104089	0.000826849
Arhgap29	Rho GTPase activating protein 29	0.254913	2.74758	0.00291593	0.011794
Rasgrf2	RAS protein-specific guanine nucleotide-releasing factor 2	0.25471	8.45621	1.14898e-05	0.00014386
Ccnf	cyclin F	0.254478	2.11902	0.0217735	0.0585801
Rpl9	ribosomal protein L9	0.254137	8.52118	1.27989e-06	2.599e-05
Ccdc81	coiled-coil domain containing 81	0.253938	3.76477	0.0116306	0.0357169
Enox2	ecto-NOX disulfide-thiol exchanger 2	0.253431	4.6808	0.00260314	0.0107625
Syndig1	synapse differentiation inducing 1	0.253261	4.38812	1.11799e-05	0.000140762
Zeb2os	zinc finger E-box binding homeobox 2, opposite strand	0.252839	1.30657	0.011277	0.0348453
Dcx	doublecortin	0.252837	4.81704	2.98792e-05	0.000307663
Stx8	syntaxin 8	0.252563	3.92219	5.75086e-07	1.45276e-05
Gm10767	predicted gene 10767	0.252413	0.484548	0.0105651	0.0331172
Pecam1	platelet/endothelial cell adhesion molecule 1	0.252354	3.19787	0.00587597	0.0205731
Zfp938	zinc finger protein 938	0.252107	4.57196	1.26509e-06	2.57224e-05
Zfp945	zinc finger protein 945	0.252103	4.20363	3.95199e-06	6.25722e-05
Tmem263	transmembrane protein 263	0.252085	5.53265	1.67199e-07	5.85899e-06
Zfp964	zinc finger protein 964	0.251999	1.78578	0.000798956	0.00417233
Haus1	HAUS augmin-like complex, subunit 1	0.251897	2.95434	2.83858e-05	0.000295986
Rps12	ribosomal protein S12	0.251542	7.0607	5.83346e-05	0.000524978
Cd55	CD55 molecule, decay accelerating factor for complement	0.250594	3.19454	0.00170141	0.00764573
Lrif1	ligand dependent nuclear receptor interacting factor 1	0.250332	4.6446	1.48884e-06	2.87232e-05
Pgm2l1	phosphoglucomutase 2-like 1	0.250328	8.05181	1.41637e-05	0.000170082
Ccdc90b	coiled-coil domain containing 90B	0.249983	4.23713	1.26764e-08	8.19516e-07
Ifit1bl1	interferon induced protein with tetratricpeptide repeats 1B like 1	0.249949	1.62081	0.00233053	0.0098226
A530058N18Rik	RIKEN cDNA A530058N18 gene	0.249761	1.94569	0.00784665	0.0258923
Timm8b	translocase of inner mitochondrial membrane 8B	0.249716	5.58871	1.9393e-06	3.52232e-05
3110009E18Rik	RIKEN cDNA 3110009E18 gene	0.249375	0.537188	0.0200454	0.0549498
Lrtm2	leucine-rich repeats and transmembrane domains 2	0.249311	6.73737	0.00015369	0.00112865
Gstm7	glutathione S-transferase, mu 7	0.249176	5.93159	5.13876e-05	0.000475943
Myh7b	myosin, heavy chain 7B, cardiac muscle, beta	0.249089	5.03849	0.0115442	0.0355115
Hnmt	histamine N-methyltransferase	0.24892	4.85236	2.04149e-05	0.000226596
Cstb	cystatin B	0.248895	4.13907	3.03486e-06	5.05458e-05
Gpr176	G protein-coupled receptor 176	0.248857	5.42621	0.000471674	0.00271766
Pcmtd1	protein-L-isoaspartate (D-aspartate) O-methyltransferase domain containing 1	0.248801	6.86308	6.27785e-10	7.36555e-08
9330159M07Rik	RIKEN cDNA 9330159M07 gene	0.248751	0.850036	0.00654424	0.0223875
Pex12	peroxisomal biogenesis factor 12	0.248323	3.5956	3.34574e-06	5.48087e-05
Dnajb9	DnaJ heat shock protein family (Hsp40) member B9	0.248272	6.57679	7.57778e-07	1.75527e-05
Prmt8	protein arginine N-methyltransferase 8	0.248269	4.75503	1.59886e-05	0.000187033
Sema3d	sema domain, immunoglobulin domain (Ig), short basic domain, secreted, (semaphorin) 3D	0.247935	3.30638	9.6033e-05	0.000778836
Cdnf	cerebral dopamine neurotrophic factor	0.247903	1.14618	0.0117076	0.0358955
9430083A17Rik	RIKEN cDNA 9430083A17 gene	0.247452	1.25476	0.00918961	0.0295122
Ska2	spindle and kinetochore associated complex subunit 2	0.247448	4.09052	2.88788e-05	0.000299942
Dnajc25	DnaJ heat shock protein family (Hsp40) member C25	0.247119	2.15936	0.000273418	0.00176047
Mrps36	mitochondrial ribosomal protein S36	0.246997	3.79563	5.94465e-05	0.000532437
Zfand6	zinc finger, AN1-type domain 6	0.246847	5.8361	2.00249e-05	0.000223205
Fopnl	NA	0.246743	4.94921	2.47316e-06	4.27645e-05
1700001L19Rik	RIKEN cDNA 1700001L19 gene	0.246097	5.06791	9.9737e-07	2.15811e-05
Fut9	fucosyltransferase 9	0.246091	6.96047	3.81575e-07	1.04383e-05
Trhde	TRH-degrading enzyme	0.245695	5.26393	0.00173827	0.00778411
Ifih1	interferon induced with helicase C domain 1	0.245236	2.55331	0.000863353	0.00444271
Lypd6	LY6/PLAUR domain containing 6	0.245204	4.68924	2.00236e-06	3.62461e-05
Map3k19	mitogen-activated protein kinase kinase kinase 19	0.245152	4.38705	0.0218503	0.0587386
4930429B21Rik	RIKEN cDNA 4930429B21 gene	0.245017	0.899885	0.0192183	0.0531768
Cetn3	centrin 3	0.244758	6.4234	2.68325e-06	4.58963e-05
Prdx1	peroxiredoxin 1	0.244726	7.13711	1.68802e-07	5.88912e-06
Prr16	proline rich 16	0.244529	2.56443	5.8884e-05	0.000529021
Tma7	translational machinery associated 7	0.244518	6.68498	0.000179084	0.00126286
Pfdn4	prefoldin 4	0.244222	4.30295	0.000386703	0.00233155
Cmc1	COX assembly mitochondrial protein 1	0.243818	3.65174	7.91376e-05	0.000670299
Tm2d1	TM2 domain containing 1	0.243105	5.07856	6.25907e-07	1.5413e-05
Gm10336	predicted gene 10336	0.243078	3.59829	1.93917e-06	3.52232e-05
Vamp7	vesicle-associated membrane protein 7	0.242766	5.60948	2.0854e-06	3.75227e-05
Snhg1	small nucleolar RNA host gene 1	0.242574	3.05949	0.000274537	0.00176546
Glmn	glomulin, FKBP associated protein	0.242529	4.19798	4.56931e-07	1.20823e-05
Nup37	nucleoporin 37	0.242524	2.11796	0.00134761	0.00634694
C330018D20Rik	RIKEN cDNA C330018D20 gene	0.242398	3.93203	6.48889e-08	2.87892e-06
Nnt	nicotinamide nucleotide transhydrogenase	0.242236	4.92777	0.000242943	0.00159999
B3glct	beta-3-glucosyltransferase	0.242016	3.94293	4.17156e-06	6.49051e-05
Omg	oligodendrocyte myelin glycoprotein	0.241957	6.5914	3.00343e-07	8.72867e-06
9230110C19Rik	NA	0.241812	4.25297	3.55213e-07	9.8879e-06
Top3a	topoisomerase (DNA) III alpha	0.241811	3.84637	0.000607884	0.00334664
Lactb2	lactamase, beta 2	0.241187	3.81721	7.7452e-05	0.000658523
Mcts1	malignant T cell amplified sequence 1	0.241085	5.02549	5.97e-06	8.59625e-05
Dram2	DNA-damage regulated autophagy modulator 2	0.241048	5.17964	2.51465e-08	1.40467e-06
Hsd11b1	hydroxysteroid 11-beta dehydrogenase 1	0.240792	3.0983	0.00198836	0.0086562
Shtn1	shootin 1	0.240519	6.37615	0.000355466	0.00217719
Rpl23	ribosomal protein L23	0.240132	7.92325	5.27027e-06	7.74891e-05
Btf3l4	basic transcription factor 3-like 4	0.239551	5.89405	8.82658e-07	1.95257e-05
Hpgds	hematopoietic prostaglandin D synthase	0.239294	2.89048	0.00491361	0.017883
Tmed5	transmembrane p24 trafficking protein 5	0.239074	5.68584	2.78879e-07	8.29738e-06
Grm3	glutamate receptor, metabotropic 3	0.238979	4.72923	0.000307665	0.00193761
Gpr34	G protein-coupled receptor 34	0.238919	3.19915	0.00574673	0.0202227
Stk33	serine/threonine kinase 33	0.238749	4.01534	0.000937223	0.00474574
Slc35g1	solute carrier family 35, member G1	0.238617	1.2274	0.0125071	0.0379465
Kcnn2	potassium intermediate/small conductance calcium-activated channel, subfamily N, member 2	0.238295	3.85501	0.000588955	0.00325942
Hltf	helicase-like transcription factor	0.238049	5.42007	3.62777e-06	5.84539e-05
Vsnl1	visinin-like 1	0.237944	8.37574	1.98219e-05	0.00022141
Tmem196	transmembrane protein 196	0.23779	5.11791	8.98493e-07	1.97931e-05
Kbtbd3	kelch repeat and BTB (POZ) domain containing 3	0.237692	3.09267	4.17774e-06	6.49373e-05
Jade3	jade family PHD finger 3	0.237486	3.90965	0.000181892	0.00127534
Tex30	testis expressed 30	0.237408	2.02094	0.00111762	0.00547878
P2rx4	purinergic receptor P2X, ligand-gated ion channel 4	0.237239	3.57713	1.27162e-05	0.000155986
Nck1	non-catalytic region of tyrosine kinase adaptor protein 1	0.237002	4.98389	3.73588e-07	1.03088e-05
Rian	RNA imprinted and accumulated in nucleus	0.236965	9.65748	1.19042e-07	4.53952e-06
Pfdn5	prefoldin 5	0.236783	7.27566	1.2259e-05	0.000151459
Fkbp3	FK506 binding protein 3	0.236546	7.46209	5.86037e-07	1.47207e-05
1110046J04Rik	RIKEN cDNA 1110046J04 gene	0.236417	1.1781	0.00202251	0.0087622
Syt4	synaptotagmin IV	0.236304	8.66766	1.91593e-07	6.45766e-06
Lhx1os	LIM homeobox 1, opposite strand	0.235707	3.70165	0.0159142	0.0460141
Colgalt2	collagen beta(1-O)galactosyltransferase 2	0.235395	2.1096	0.00403811	0.0153601
Xrcc4	X-ray repair complementing defective repair in Chinese hamster cells 4	0.235339	3.52269	4.53545e-05	0.000431712
Dcun1d1	DCN1, defective in cullin neddylation 1, domain containing 1 (S. cerevisiae)	0.234848	5.85967	2.76589e-09	2.48915e-07
1110004F10Rik	RIKEN cDNA 1110004F10 gene	0.234568	7.39291	2.16967e-07	6.99908e-06
Sat1	spermidine/spermine N1-acetyl transferase 1	0.234318	5.50398	2.84884e-05	0.000296861
Klhl4	kelch-like 4	0.233556	4.08752	0.000404461	0.00240927
Fbxo32	F-box protein 32	0.233341	3.93473	0.0060314	0.0209729
Mospd1	motile sperm domain containing 1	0.233234	3.79679	1.65412e-06	3.10553e-05
Gbp7	guanylate binding protein 7	0.233016	2.14817	0.019542	0.0538787
Rps11	ribosomal protein S11	0.232974	8.11283	1.06265e-06	2.25319e-05
Rpl17	ribosomal protein L17	0.232901	8.2778	1.08804e-05	0.00013745
Apoo	apolipoprotein O	0.232876	2.91084	9.89178e-05	0.000794726
Rab9	RAB9, member RAS oncogene family	0.232847	4.96991	3.90064e-07	1.06521e-05
Bola2	bolA-like 2 (E. coli)	0.232555	3.6619	8.64535e-05	0.000718812
Cckar	cholecystokinin A receptor	0.232498	3.73905	0.00182742	0.00810997
Ap3s1	adaptor-related protein complex 3, sigma 1 subunit	0.232422	5.43061	2.55888e-07	7.90061e-06
Gla	galactosidase, alpha	0.232129	4.24279	8.26156e-07	1.8561e-05
Idi1	isopentenyl-diphosphate delta isomerase	0.231854	4.73645	5.73879e-05	0.000518521
Rbm41	RNA binding motif protein 41	0.231744	3.0823	0.000941777	0.00476575
Dsg2	desmoglein 2	0.231698	3.54717	0.0171669	0.0486506
Abcg2	ATP binding cassette subfamily G member 2 (Junior blood group)	0.231495	3.63294	3.59964e-05	0.000359261
C1d	C1D nuclear receptor co-repressor	0.230742	6.23074	7.87222e-07	1.79403e-05
Pik3cg	phosphatidylinositol-4,5-bisphosphate 3-kinase catalytic subunit gamma	0.230626	1.31754	0.0163847	0.047065
Gng5	guanine nucleotide binding protein (G protein), gamma 5	0.230476	3.91205	0.000712993	0.00380111
Zfp946	zinc finger protein 946	0.230355	4.61628	1.35981e-06	2.69225e-05
Lmo1	LIM domain only 1	0.230291	2.57618	0.00355157	0.0138657
Tmlhe	trimethyllysine hydroxylase, epsilon	0.229487	2.90886	8.32565e-05	0.00069515
Tmem161b	transmembrane protein 161B	0.229317	3.93965	3.62984e-05	0.000361591
Ost4	oligosaccharyltransferase complex subunit 4 (non-catalytic)	0.229163	4.87856	1.78081e-07	6.11848e-06
Acot13	acyl-CoA thioesterase 13	0.229097	5.19864	7.44768e-05	0.000640064
Ociad2	OCIA domain containing 2	0.228672	5.35554	4.92013e-05	0.000460306
Pvrl3	NA	0.228452	4.40582	0.000230355	0.0015369
Ccl25	chemokine (C-C motif) ligand 25	0.228369	2.48126	0.00130851	0.00621084
Fkbp7	FK506 binding protein 7	0.228315	0.863273	0.0183287	0.051255
Mettl5	methyltransferase like 5	0.228278	3.49787	6.18871e-06	8.8071e-05
Coch	cochlin	0.227871	4.85482	0.0123017	0.0374417
Gulp1	GULP, engulfment adaptor PTB domain containing 1	0.227829	2.76803	0.000866462	0.00445106
Tfrc	transferrin receptor	0.227591	6.31303	0.000451328	0.00262816
Ube2v2	ubiquitin-conjugating enzyme E2 variant 2	0.227307	6.19996	4.07448e-09	3.44463e-07
Vma21	VMA21 vacuolar H+ATPase homolog (S. cerevisiae)	0.227241	6.4479	1.46717e-08	9.14904e-07
Tceb1	NA	0.227233	6.2156	1.41023e-06	2.76101e-05
Lypla1	lysophospholipase 1	0.227031	5.28626	2.79646e-07	8.29738e-06
4930480K23Rik	RIKEN cDNA 4930480K23 gene	0.226955	0.879779	0.0203417	0.055579
Pin4	peptidyl-prolyl cis/trans isomerase, NIMA-interacting, 4 (parvulin)	0.226878	4.80661	5.24561e-05	0.000483054
Mrpl1	mitochondrial ribosomal protein L1	0.22675	4.45757	2.23705e-06	3.95453e-05
Fam188a	NA	0.226484	4.58471	6.17267e-08	2.76808e-06
Gas5	growth arrest specific 5	0.226451	5.90823	0.00298192	0.0120027
Unc13c	unc-13 homolog C	0.225983	5.80836	0.00474866	0.0174026
Gm4944	NA	0.225948	3.68974	7.01873e-05	0.000610152
2700060E02Rik	NA	0.225943	6.01754	4.14199e-06	6.46355e-05
Snhg7	small nucleolar RNA host gene 7	0.225917	1.6309	0.00680406	0.0231265
Frmd3	FERM domain containing 3	0.225905	3.34231	1.55904e-06	2.98593e-05
Tnfaip8l3	tumor necrosis factor, alpha-induced protein 8-like 3	0.225814	1.90275	0.0216219	0.0583223
Ube2e1	ubiquitin-conjugating enzyme E2E 1	0.225712	6.81852	9.16378e-09	6.43417e-07
Spidr	scaffolding protein involved in DNA repair	0.225643	2.05056	0.00514054	0.0184838
Pctp	phosphatidylcholine transfer protein	0.225457	1.24388	0.0182423	0.0510673
Scoc	short coiled-coil protein	0.224754	7.63875	0.000123686	0.000948483
Lsm3	LSM3 homolog, U6 small nuclear RNA and mRNA degradation associated	0.22427	4.13351	8.75309e-05	0.000725865
Eif3e	eukaryotic translation initiation factor 3, subunit E	0.224185	6.5046	8.33093e-08	3.49084e-06
Commd3	COMM domain containing 3	0.224133	4.90136	7.91909e-07	1.797e-05
Bzw2	basic leucine zipper and W2 domains 2	0.224006	4.84068	3.07179e-05	0.000315117
Gsg1l	GSG1-like	0.223339	4.9706	0.00110902	0.00544635
Il18	interleukin 18	0.223297	3.6919	0.000252495	0.00164986
Tmem126a	transmembrane protein 126A	0.223176	3.99097	4.02918e-06	6.33812e-05
Sugct	succinyl-CoA glutarate-CoA transferase	0.222812	3.00235	0.00119733	0.005796
Tmem69	transmembrane protein 69	0.222317	3.74184	1.27517e-05	0.000156085
Deb1	NA	0.22222	4.05903	5.83655e-07	1.46972e-05
Gm14295	predicted gene 14295	0.22159	3.51636	0.000471656	0.00271766
Cth	cystathionase (cystathionine gamma-lyase)	0.221464	1.93794	0.00307075	0.0123071
Brip1os	BRCA1 interacting protein C-terminal helicase 1, opposite strand	0.221125	4.23894	2.44599e-05	0.000261417
Sstr1	somatostatin receptor 1	0.22111	5.18039	0.00711213	0.0239502
Nuak2	NUAK family, SNF1-like kinase, 2	0.221068	1.61112	0.0170373	0.0484046
Pbdc1	polysaccharide biosynthesis domain containing 1	0.220755	4.45736	0.00124167	0.00596293
Hnrnpa3	heterogeneous nuclear ribonucleoprotein A3	0.220663	7.05386	7.88335e-07	1.79403e-05
Acadl	acyl-Coenzyme A dehydrogenase, long-chain	0.220489	5.46509	1.1403e-05	0.000143115
Cetn2	centrin 2	0.220465	5.9714	1.70253e-05	0.00019699
Cbx3	chromobox 3	0.220036	7.07418	1.47162e-07	5.34609e-06
Homez	homeodomain leucine zipper-encoding gene	0.220017	4.68098	5.18424e-07	1.33301e-05
Rab13	RAB13, member RAS oncogene family	0.219898	3.56102	8.6696e-05	0.000720136
S100a1	S100 calcium binding protein A1	0.219827	5.36403	0.000581828	0.00322674
Apbb2	amyloid beta (A4) precursor protein-binding, family B, member 2	0.219803	6.15638	6.71573e-05	0.000589637
Snhg8	small nucleolar RNA host gene 8	0.219668	3.95941	0.000866753	0.00445106
Bbip1	BBSome interacting protein 1	0.219521	5.02094	2.17092e-06	3.8704e-05
Gtf2a2	general transcription factor II A, 2	0.219492	4.32576	7.07987e-06	9.7775e-05
C1galt1	core 1 synthase, glycoprotein-N-acetylgalactosamine 3-beta-galactosyltransferase, 1	0.219383	3.14305	0.000676894	0.00364299
Chmp5	charged multivesicular body protein 5	0.219317	6.78572	1.89397e-07	6.4237e-06
Stat1	signal transducer and activator of transcription 1	0.219165	4.82146	1.60752e-05	0.00018777
Tmem128	transmembrane protein 128	0.219037	4.68454	6.64111e-07	1.60104e-05
Chm	choroidermia (RAB escort protein 1)	0.218742	5.30247	1.40357e-06	2.75165e-05
Itgb3bp	integrin beta 3 binding protein (beta3-endonexin)	0.218684	2.70263	0.0005316	0.00299218
Wbp5	NA	0.218402	7.20147	2.8186e-05	0.000294096
Psma4	proteasome subunit alpha 4	0.218283	6.0564	1.38662e-06	2.72828e-05
Tgfb3	transforming growth factor, beta 3	0.21823	3.44072	0.000100225	0.000802558
Ndufb4	NADH:ubiquinone oxidoreductase subunit B4	0.217591	4.67051	2.26314e-05	0.000246186
Sptssa	serine palmitoyltransferase, small subunit A	0.217555	5.41115	2.6493e-05	0.000279562
Tmem68	transmembrane protein 68	0.217499	4.73732	3.76237e-07	1.03639e-05
Lyrm5	NA	0.217498	5.01106	3.48892e-07	9.78071e-06
Gpr165	G protein-coupled receptor 165	0.217453	6.1768	0.00451324	0.016742
Snora28	small nucleolar RNA, H/ACA box 28	0.217065	0.659785	0.0175182	0.0493897
Rras2	related RAS viral (r-ras) oncogene 2	0.21693	2.27893	0.000831343	0.00432151
Ndufs4	NADH:ubiquinone oxidoreductase core subunit S4	0.216775	6.01245	1.53768e-05	0.000180961
Gm1604b	predicted gene 1604b	0.216714	1.84915	0.0128277	0.0387134
Zfp120	zinc finger protein 120	0.216706	4.31744	3.69485e-06	5.92935e-05
Lpar2	lysophosphatidic acid receptor 2	0.21629	1.88366	0.00346928	0.0135887
AI593442	expressed sequence AI593442	0.216161	5.55224	2.782e-05	0.000291815
Sertad4	SERTA domain containing 4	0.215703	4.25185	7.05318e-07	1.66989e-05
Eed	embryonic ectoderm development	0.215388	4.40592	1.04187e-07	4.11177e-06
Rasgef1b	RasGEF domain family, member 1B	0.215366	4.34865	2.96366e-05	0.000306406
Magt1	magnesium transporter 1	0.215244	4.9449	0.000202667	0.00138783
Gdpd1	glycerophosphodiester phosphodiesterase domain containing 1	0.215011	6.14622	1.14143e-05	0.000143144
Ift74	intraflagellar transport 74	0.2147	5.60047	5.38886e-06	7.87399e-05
Clock	circadian locomotor output cycles kaput	0.214655	6.97031	3.81673e-05	0.000376656
Sox13	SRY (sex determining region Y)-box 13	0.214546	4.65832	0.0223378	0.0596943
Serpinb6a	serine (or cysteine) peptidase inhibitor, clade B, member 6a	0.214475	5.23769	8.47126e-07	1.88981e-05
Zfp930	zinc finger protein 930	0.214404	4.2045	3.08005e-06	5.11372e-05
Fam183b	family with sequence similarity 183, member B	0.214015	4.60512	0.00442681	0.0165096
Bet1	Bet1 golgi vesicular membrane trafficking protein	0.213547	4.59547	1.58991e-06	3.01972e-05
Fam19a1	NA	0.213545	3.3889	0.00796216	0.0261977
Snhg12	small nucleolar RNA host gene 12	0.21344	3.818	0.000193105	0.00133738
Acot9	acyl-CoA thioesterase 9	0.213305	4.13271	9.98961e-05	0.000800331
Sf3b6	splicing factor 3B, subunit 6	0.213175	5.3888	1.50786e-05	0.000178232
Taf1d	TATA-box binding protein associated factor, RNA polymerase I, D	0.213146	4.02428	0.000153775	0.00112865
Msmo1	methylsterol monoxygenase 1	0.213069	6.65081	1.68298e-05	0.000195287
2007-09-01	NA	0.212982	8.56125	4.44798e-08	2.18794e-06
Abcb1a	ATP-binding cassette, sub-family B (MDR/TAP), member 1A	0.212795	3.76276	0.00438082	0.0163902
Zfp770	zinc finger protein 770	0.21258	4.89168	4.23267e-07	1.14016e-05
Pou3f2	POU domain, class 3, transcription factor 2	0.212549	4.62668	0.00248646	0.0103721
Dbt	dihydrolipoamide branched chain transacylase E2	0.212514	4.89431	6.76321e-06	9.45476e-05
Ankmy2	ankyrin repeat and MYND domain containing 2	0.212355	6.04706	2.68777e-07	8.10886e-06
Ufm1	ubiquitin-fold modifier 1	0.212151	6.18095	1.69967e-09	1.7649e-07
Sepp1	NA	0.212114	8.45017	0.000108812	0.000856172
Zfp943	zinc finger prtoein 943	0.211932	4.56102	1.54936e-05	0.000181915
Shfm1	NA	0.211814	5.10119	8.95118e-05	0.000737657
Spon1	spondin 1, (f-spondin) extracellular matrix protein	0.211768	8.20404	0.000239898	0.00158455
Amn1	antagonist of mitotic exit network 1	0.21176	3.81318	6.01848e-06	8.63467e-05
BC030500	cDNA sequence BC030500	0.211732	4.4181	0.00526499	0.0188244
Atp5f1	NA	0.211688	7.74928	6.93585e-07	1.64703e-05
Cntn6	contactin 6	0.211649	5.17962	0.000672452	0.00362796
Bnip3	BCL2/adenovirus E1B interacting protein 3	0.211548	6.40814	9.91298e-07	2.1479e-05
Spdya	speedy/RINGO cell cycle regulator family, member A	0.211363	1.34868	0.01279	0.0386458
Efcab7	EF-hand calcium binding domain 7	0.211264	1.6857	0.0179611	0.0503871
Phospho2	phosphatase, orphan 2	0.211033	4.84407	5.36357e-07	1.37022e-05
Htr2c	5-hydroxytryptamine (serotonin) receptor 2C	0.211009	6.58545	0.000162384	0.00117766
Rpl24	ribosomal protein L24	0.210654	7.82314	7.40573e-06	0.000101382
Kcnc2	potassium voltage gated channel, Shaw-related subfamily, member 2	0.210649	6.45404	0.000788114	0.00412516
Pdcd4	programmed cell death 4	0.210642	6.95469	9.5359e-05	0.000776152
Pole4	polymerase (DNA-directed), epsilon 4 (p12 subunit)	0.21058	4.55747	2.52916e-07	7.85477e-06
Pno1	partner of NOB1 homolog	0.21056	4.29901	7.10295e-07	1.67666e-05
Rbm7	RNA binding motif protein 7	0.21043	4.84238	6.99428e-08	3.05185e-06
Pcsk5	proprotein convertase subtilisin/kexin type 5	0.210408	3.47873	0.00521043	0.0186715
Cpeb4	cytoplasmic polyadenylation element binding protein 4	0.210403	7.05138	7.12948e-06	9.82801e-05
Cmpk1	cytidine monophosphate (UMP-CMP) kinase 1	0.210368	6.30315	9.39251e-08	3.83288e-06
Ephb1	Eph receptor B1	0.209848	6.19207	0.000166887	0.00120103
Med31	mediator complex subunit 31	0.209819	3.73071	6.32774e-05	0.000560794
Cldn10	claudin 10	0.209749	4.65515	0.00150384	0.00691418
Rasgrp3	RAS, guanyl releasing protein 3	0.209346	3.27077	0.0200447	0.0549498
9430020K01Rik	NA	0.209319	4.5084	0.0101048	0.0319028
Paip1	polyadenylate binding protein-interacting protein 1	0.209194	6.70899	5.07861e-09	4.12513e-07
Mrpl20	mitochondrial ribosomal protein L20	0.20914	4.93184	1.86257e-05	0.000210874
Zfp277	zinc finger protein 277	0.209114	4.0331	0.000241746	0.0015941
Ccne2	cyclin E2	0.208933	2.89059	0.00367851	0.0142769
Cul4b	cullin 4B	0.208919	6.74943	7.60619e-07	1.75875e-05
Dstn	destrin	0.208837	7.32198	1.79909e-07	6.15458e-06
Chchd1	coiled-coil-helix-coiled-coil-helix domain containing 1	0.20883	4.49297	0.000249073	0.00163019
Mcts2	malignant T cell amplified sequence 2	0.208774	2.44324	0.00132488	0.00626857
B3gnt7	UDP-GlcNAc:betaGal beta-1,3-N-acetylglucosaminyltransferase 7	0.208751	1.65254	0.0106825	0.0333835
Eepd1	endonuclease/exonuclease/phosphatase family domain containing 1	0.208671	2.84322	0.00175174	0.00783557
Cbwd1	COBW domain containing 1	0.208318	3.99727	1.91335e-05	0.000215085
Zbtb33	zinc finger and BTB domain containing 33	0.208314	5.29686	2.26002e-06	3.99069e-05
Slc25a24	solute carrier family 25 (mitochondrial carrier, phosphate carrier), member 24	0.207733	2.85114	0.00935749	0.0299602
Ostc	oligosaccharyltransferase complex subunit (non-catalytic)	0.207572	5.52891	1.37e-05	0.000165014
Cetn4	centrin 4	0.207496	4.519	0.00183758	0.00814138
4930412C18Rik	RIKEN cDNA 4930412C18 gene	0.207384	2.4844	0.00607488	0.0210914
Cox6b2	cytochrome c oxidase subunit 6B2	0.207253	1.08227	0.0201611	0.0552096
Esco1	establishment of sister chromatid cohesion N-acetyltransferase 1	0.207192	4.99814	6.17486e-06	8.8071e-05
Adgrf5	adhesion G protein-coupled receptor F5	0.207158	3.99646	0.00264865	0.0109136
Naca	nascent polypeptide-associated complex alpha polypeptide	0.207095	8.03908	1.6871e-06	3.15118e-05
Rpl5	ribosomal protein L5	0.206999	7.68466	1.69391e-06	3.16017e-05
Thap6	THAP domain containing 6	0.206701	2.75908	0.00647667	0.0222043
Pi4k2b	phosphatidylinositol 4-kinase type 2 beta	0.206221	1.8649	0.0159608	0.0461068
Mrps21	mitochondrial ribosomal protein S21	0.206218	4.62366	3.15051e-05	0.000321527
Thbs2	thrombospondin 2	0.206179	3.63664	0.00347991	0.0136263
Ndufaf2	NADH:ubiquinone oxidoreductase complex assembly factor 2	0.206075	4.27142	0.00025614	0.00166955
Snhg14	small nucleolar RNA host gene 14	0.205964	3.96883	0.00036133	0.00220884
Zfp729b	zinc finger protein 729b	0.205959	4.01166	3.69954e-06	5.93087e-05
Alg6	asparagine-linked glycosylation 6 (alpha-1,3,-glucosyltransferase)	0.205825	3.69825	4.79677e-05	0.000451432
Atp5j	ATP synthase, H transporting, mitochondrial F0 complex, subunit F	0.205796	7.08225	4.66865e-05	0.000441836
Fam19a2	NA	0.205766	4.51657	0.0182542	0.0510827
Rbbp8	retinoblastoma binding protein 8, endonuclease	0.205757	2.45838	0.00399189	0.0152209
Zfp712	zinc finger protein 712	0.205631	3.24527	0.000210639	0.00143374
Sytl2	synaptotagmin-like 2	0.20562	4.03021	0.0166423	0.0475465
Sumo2	small ubiquitin-like modifier 2	0.205349	6.27903	9.5883e-06	0.00012528
Zbtb18	zinc finger and BTB domain containing 18	0.205206	5.7489	2.375e-05	0.000255381
Cycs	cytochrome c, somatic	0.205118	6.54782	1.28931e-05	0.000157209
4932411E22Rik	NA	0.204919	3.81355	0.00307449	0.0123159
Bex4	brain expressed X-linked 4	0.204509	5.69288	8.03139e-05	0.000677365
Rnf138	ring finger protein 138	0.20443	3.93731	4.83663e-05	0.000454374
Nmrk1	nicotinamide riboside kinase 1	0.204355	1.75613	0.0220358	0.0591168
Mpv17l	Mpv17 transgene, kidney disease mutant-like	0.204288	5.91241	2.51864e-08	1.40467e-06
Btf3	basic transcription factor 3	0.204274	7.25965	2.31939e-05	0.000251106
Fn1	fibronectin 1	0.204241	4.23781	0.0219369	0.0589113
Spryd7	SPRY domain containing 7	0.204147	6.28477	6.645e-08	2.91552e-06
Ggnbp2os	gametogenetin binding protein 2, opposite strand	0.204125	1.46045	0.0147137	0.0431413
Ssb	Sjogren syndrome antigen B	0.204032	7.88248	1.72788e-05	0.000199765
Rasd2	RASD family, member 2	0.203632	5.99783	0.00417051	0.0157522
Rps3a1	ribosomal protein S3A1	0.203475	8.59014	0.00243336	0.0101909
1700021F05Rik	NA	0.203456	4.15911	2.54094e-05	0.000270288
Mrpl52	mitochondrial ribosomal protein L52	0.20333	3.71391	0.000716962	0.00381713
D16Ertd472e	DNA segment, Chr 16, ERATO Doi 472, expressed	0.203251	3.11168	0.0209622	0.0569413
Gabra4	gamma-aminobutyric acid (GABA) A receptor, subunit alpha 4	0.203248	5.26954	9.45902e-05	0.000772644
Immp2l	IMP2 inner mitochondrial membrane peptidase-like (S. cerevisiae)	0.203243	1.82202	0.0103399	0.0325011
Rwdd1	RWD domain containing 1	0.202885	5.22366	2.10243e-06	3.77556e-05
Chmp1b	charged multivesicular body protein 1B	0.202735	4.99824	7.70661e-06	0.000104587
Pex3	peroxisomal biogenesis factor 3	0.202509	4.59128	6.43586e-07	1.55868e-05
BC003331	NA	0.202279	6.24093	1.53315e-08	9.44887e-07
Rab11a	RAB11A, member RAS oncogene family	0.202226	7.12383	2.64728e-09	2.43781e-07
Sh3rf3	SH3 domain containing ring finger 3	0.202178	3.84923	0.00142671	0.00663856
Gpr22	G protein-coupled receptor 22	0.202131	3.69257	0.0172777	0.0488943
Ephx4	epoxide hydrolase 4	0.202074	3.14768	0.00525257	0.0187927
Fam69a	NA	0.201902	4.92831	3.20307e-05	0.000326439
Zfp367	zinc finger protein 367	0.201887	3.91386	1.19706e-05	0.000148475
Vwc2l	von Willebrand factor C domain-containing protein 2-like	0.201839	4.45103	0.00511194	0.0184018
Epb4.1l5	NA	0.2016	5.18018	0.0135416	0.0403592
Ube2a	ubiquitin-conjugating enzyme E2A	0.201518	4.66064	2.10157e-05	0.000231964
Cyp20a1	cytochrome P450, family 20, subfamily a, polypeptide 1	0.201437	3.94889	6.74951e-06	9.4523e-05
Rarb	retinoic acid receptor, beta	0.200933	2.70343	0.00620676	0.0214648
Cox7a2	cytochrome c oxidase subunit 7A2	0.200929	6.30901	1.26715e-05	0.000155584
Atp6v1e1	ATPase, H transporting, lysosomal V1 subunit E1	0.200752	8.13868	9.75649e-07	2.12546e-05
Pam	peptidylglycine alpha-amidating monooxygenase	0.200748	9.07115	7.18127e-07	1.69262e-05
8430429K09Rik	RIKEN cDNA 8430429K09 gene	0.200656	2.61157	0.00459877	0.016979
Snx5	sorting nexin 5	0.20061	6.63226	2.9332e-07	8.57176e-06
Sarnp	SAP domain containing ribonucleoprotein	0.200368	5.27196	0.000487032	0.0027889
Ndufa12	NADH:ubiquinone oxidoreductase subunit A12	0.200363	6.43638	6.42532e-06	9.08667e-05
Mbip	MAP3K12 binding inhibitory protein 1	0.199984	4.07171	0.000174863	0.00124311
Dars	aspartyl-tRNA synthetase	0.199854	6.67598	3.41427e-08	1.79663e-06
Rasa2	RAS p21 protein activator 2	0.199765	5.17235	0.000261202	0.00169626
2010-09-01	NA	0.199502	2.93594	0.000673516	0.00363098
Lppr1	NA	0.19935	3.89835	0.00129422	0.0061522
Aasdhppt	aminoadipate-semialdehyde dehydrogenase-phosphopantetheinyl transferase	0.199324	5.06381	1.76031e-06	3.26826e-05
Gucy1a3	NA	0.199171	5.91083	0.00013597	0.00102261
Zfp273	zinc finger protein 273	0.199035	3.10957	4.73448e-05	0.000446366
Onecut2	one cut domain, family member 2	0.198858	4.41326	0.0203967	0.0557101
Hprt	hypoxanthine guanine phosphoribosyl transferase	0.198855	7.53057	1.23215e-06	2.52668e-05
Zfp961	zinc finger protein 961	0.198832	4.00704	0.000975453	0.00490327
Snrnp48	small nuclear ribonucleoprotein 48 (U11/U12)	0.19878	3.6907	0.0020611	0.00890501
Fam189a2	family with sequence similarity 189, member A2	0.198659	5.25656	0.00101235	0.00505507
Pik3cb	phosphatidylinositol-4,5-bisphosphate 3-kinase catalytic subunit beta	0.198315	5.30491	0.000483827	0.00277556
Alk	anaplastic lymphoma kinase	0.198311	4.72977	0.0071912	0.0241675
Magoh	mago homolog, exon junction complex core component	0.197963	4.35756	7.50011e-05	0.000643095
Neto2	neuropilin (NRP) and tolloid (TLL)-like 2	0.19795	5.69458	9.57284e-05	0.000777959
Tpk1	thiamine pyrophosphokinase	0.197736	1.38979	0.00516131	0.0185374
Morn2	MORN repeat containing 2	0.197678	3.76328	0.00043269	0.00254345
Sav1	salvador family WW domain containing 1	0.19755	4.03562	1.06938e-05	0.000136047
Fundc2	FUN14 domain containing 2	0.197295	6.14373	1.32763e-06	2.65845e-05
Bud31	BUD31 homolog	0.197231	4.922	4.44992e-05	0.00042536
Snrpb2	U2 small nuclear ribonucleoprotein B	0.197095	5.02684	1.70263e-05	0.00019699
5330434G04Rik	RIKEN cDNA 5330434G04 gene	0.197078	3.09691	0.00576078	0.0202542
Pex2	peroxisomal biogenesis factor 2	0.196967	4.95765	6.87166e-09	5.1156e-07
Gnl3	guanine nucleotide binding protein-like 3 (nucleolar)	0.196938	4.85481	5.77003e-05	0.000520315
Skp1a	NA	0.196716	8.81324	1.04582e-06	2.23138e-05
E130114P18Rik	RIKEN cDNA E130114P18 gene	0.196505	3.06294	0.00364573	0.0141844
Zeb2	zinc finger E-box binding homeobox 2	0.196398	5.38153	0.00622114	0.0214958
Ccnc	cyclin C	0.196204	5.02735	3.79031e-06	6.04872e-05
Eya1	EYA transcriptional coactivator and phosphatase 1	0.195904	1.90206	0.00236225	0.00993512
Mtmr11	myotubularin related protein 11	0.195679	2.55411	0.0024011	0.0100718
Egfl6	EGF-like-domain, multiple 6	0.195511	2.02626	0.022205	0.0594698
Pet100	PET100 homolog	0.195345	2.83404	0.00340805	0.0134046
Pax6	paired box 6	0.195322	2.766	0.0126322	0.0382564
Haus2	HAUS augmin-like complex, subunit 2	0.195256	4.87116	1.71802e-06	3.20138e-05
Ndufb9	NADH:ubiquinone oxidoreductase subunit B9	0.19503	6.16833	0.000247961	0.00162358
Akirin1	akirin 1	0.194933	6.6644	5.01914e-05	0.000467086
Ube2w	ubiquitin-conjugating enzyme E2W (putative)	0.194906	5.83417	1.23295e-05	0.000151974
Ddx58	DEAD/H box helicase 58	0.194672	2.35864	0.0173219	0.048967
Trappc2	trafficking protein particle complex 2	0.194578	5.32984	1.22085e-05	0.000151186
Serf1	small EDRK-rich factor 1	0.194335	2.48239	0.00467143	0.0171832
Pde3b	phosphodiesterase 3B, cGMP-inhibited	0.194142	4.43441	0.000218997	0.00147695
Ndufaf4	NADH:ubiquinone oxidoreductase complex assembly factor 4	0.194	5.0353	1.50589e-05	0.000178132
Vps35	VPS35 retromer complex component	0.193997	7.73759	1.75884e-08	1.04731e-06
Ppia	peptidylprolyl isomerase A	0.193822	9.28605	2.08432e-06	3.75227e-05
Zfp386	zinc finger protein 386 (Kruppel-like)	0.193744	4.7701	1.53895e-05	0.000180961
Rsl1d1	ribosomal L1 domain containing 1	0.193554	6.13812	3.67848e-06	5.90907e-05
1110032F04Rik	RIKEN cDNA 1110032F04 gene	0.193543	2.3228	0.0184758	0.0515481
Gm17066	NA	0.19322	4.64193	0.000112279	0.000875188
Tmem216	transmembrane protein 216	0.193063	3.0308	0.000149819	0.00110577
Nop10	NOP10 ribonucleoprotein	0.193055	5.07827	0.00102663	0.00511186
Cebpzos	CCAAT/enhancer binding protein (C/EBP), zeta, opposite strand	0.193043	4.62623	0.000150781	0.0011108
Gm1976	predicted gene 1976	0.193027	3.11297	0.00377822	0.0145852
Hcn1	hyperpolarization activated cyclic nucleotide gated potassium channel 1	0.193022	6.23475	0.00120873	0.00583868
Churc1	churchill domain containing 1	0.192851	5.16922	6.0053e-05	0.000536562
Adal	adenosine deaminase-like	0.192546	4.54115	0.000166897	0.00120103
Ormdl1	ORM1-like 1 (S. cerevisiae)	0.192434	4.43285	0.00145244	0.00673098
Pigf	phosphatidylinositol glycan anchor biosynthesis, class F	0.192313	3.06437	0.00121858	0.0058773
Cmc4	C-x(9)-C motif containing 4	0.192123	1.78816	0.00366373	0.01423
Mrps14	mitochondrial ribosomal protein S14	0.192082	5.26794	8.09171e-06	0.000108614
Ppargc1a	peroxisome proliferative activated receptor, gamma, coactivator 1 alpha	0.192022	5.55478	4.85646e-05	0.000455696
Dact1	dishevelled-binding antagonist of beta-catenin 1	0.191652	3.38865	0.00279073	0.0113758
1110059G10Rik	RIKEN cDNA 1110059G10 gene	0.191558	3.89978	0.000193343	0.00133845
Csgalnact2	chondroitin sulfate N-acetylgalactosaminyltransferase 2	0.191525	4.28187	5.39232e-05	0.000493979
Tmco1	transmembrane and coiled-coil domains 1	0.191507	5.93371	3.48485e-06	5.66118e-05
Trim12c	tripartite motif-containing 12C	0.191443	2.63402	0.0040571	0.0154139
Osbpl1a	oxysterol binding protein-like 1A	0.191378	6.41749	1.34426e-05	0.000162905
Srp19	signal recognition particle 19	0.191332	5.03528	9.48615e-05	0.000773569
Mylip	myosin regulatory light chain interacting protein	0.191212	3.88986	2.77508e-05	0.000291475
Nup35	nucleoporin 35	0.191067	4.43255	0.00535301	0.0190874
Dph6	diphthamine biosynthesis 6	0.191035	4.51612	0.000164963	0.00119308
Ndufv2	NADH:ubiquinone oxidoreductase core subunit V2	0.190955	7.35911	3.86193e-05	0.000380641
Pcgf5	polycomb group ring finger 5	0.190927	4.49261	0.00176615	0.00788446
Oxr1	oxidation resistance 1	0.190894	7.32248	5.92296e-05	0.000531035
Btg1	BTG anti-proliferation factor 1	0.190732	6.44386	0.00816965	0.0267852
Rnf150	ring finger protein 150	0.190652	6.20749	6.99879e-05	0.000608752
Mcm8	minichromosome maintenance 8 homologous recombination repair factor	0.190573	2.14045	0.00587572	0.0205731
Nudt7	nudix (nucleoside diphosphate linked moiety X)-type motif 7	0.190508	2.17191	0.00401964	0.0153046
Trp53i11	transformation related protein 53 inducible protein 11	0.190495	7.76101	0.00365706	0.0142122
Piga	phosphatidylinositol glycan anchor biosynthesis, class A	0.190439	2.66243	0.00335276	0.0132355
Mrpl13	mitochondrial ribosomal protein L13	0.190298	5.15069	0.000101688	0.000812628
Arpp19	cAMP-regulated phosphoprotein 19	0.190191	7.07463	7.57901e-07	1.75527e-05
Klhl13	kelch-like 13	0.189997	7.00144	9.89747e-06	0.000128392
Pim2	proviral integration site 2	0.189794	5.60562	0.00020009	0.0013736
Rpf2	ribosome production factor 2 homolog	0.189739	4.32552	9.82999e-05	0.000792353
Dpy30	dpy-30, histone methyltransferase complex regulatory subunit	0.189448	4.73802	3.2653e-05	0.00033132
Zc4h2	zinc finger, C4H2 domain containing	0.189332	4.16974	4.53116e-06	6.88224e-05
Scrn3	secernin 3	0.189281	4.81978	7.24417e-07	1.70238e-05
Zfp563	zinc finger protein 563	0.189213	4.33161	8.85223e-06	0.000116745
Bola3	bolA-like 3 (E. coli)	0.189206	3.98701	0.000168281	0.00120989
Ppp3r1	protein phosphatase 3, regulatory subunit B, alpha isoform (calcineurin B, type I)	0.189124	8.78902	5.27912e-06	7.7494e-05
Pacrgl	PARK2 co-regulated-like	0.188878	3.13635	0.00033568	0.00207959
Gabarap	gamma-aminobutyric acid receptor associated protein	0.188865	7.40995	1.22719e-06	2.52108e-05
Ola1	Obg-like ATPase 1	0.188586	6.37985	2.132e-05	0.000234506
Zfp51	zinc finger protein 51	0.18855	2.70632	0.00170157	0.00764573
Gm10516	predicted gene 10516	0.188532	1.977	0.0078483	0.0258924
Rnaseh2b	ribonuclease H2, subunit B	0.188418	3.28142	0.000670159	0.00361904
Haus3	HAUS augmin-like complex, subunit 3	0.188412	2.86032	0.00378532	0.0146003
1500026H17Rik	RIKEN cDNA 1500026H17 gene	0.188378	1.6827	0.0183545	0.0513
Qpct	glutaminyl-peptide cyclotransferase (glutaminyl cyclase)	0.188324	5.68195	1.66771e-05	0.000193799
Rbms1	RNA binding motif, single stranded interacting protein 1	0.188308	2.84104	0.00217849	0.0093106
Mkx	mohawk homeobox	0.188228	2.46208	0.00831238	0.0271464
Rps6ka3	ribosomal protein S6 kinase polypeptide 3	0.187847	4.66547	0.000106098	0.000838983
Eif4e3	eukaryotic translation initiation factor 4E member 3	0.18753	4.03867	2.33355e-05	0.000252003
Cfap36	cilia and flagella associated protein 36	0.187512	7.14702	3.41531e-06	5.56533e-05
Rbm24	RNA binding motif protein 24	0.18743	4.06038	7.15369e-06	9.85281e-05
Rpl11	ribosomal protein L11	0.187348	7.88887	8.3776e-06	0.000111413
Txndc17	thioredoxin domain containing 17	0.187317	4.72954	4.25577e-06	6.56469e-05
Gm10509	predicted gene 10509	0.187265	3.04948	0.00139367	0.00653087
Suclg2	succinate-Coenzyme A ligase, GDP-forming, beta subunit	0.187239	5.09833	6.53042e-05	0.000576562
Ube2q2	ubiquitin-conjugating enzyme E2Q family member 2	0.18671	6.77304	1.49682e-07	5.39848e-06
Erap1	endoplasmic reticulum aminopeptidase 1	0.186703	4.19319	0.000142264	0.00105889
Lin7c	lin-7 homolog C, crumbs cell polarity complex component	0.186688	6.99022	4.34311e-05	0.000417418
Psmc6	proteasome (prosome, macropain) 26S subunit, ATPase, 6	0.186595	6.46162	1.54445e-06	2.96157e-05
Gm9962	predicted gene 9962	0.186521	2.3335	0.00285641	0.0115947
Rps13	ribosomal protein S13	0.186477	7.00349	3.3428e-05	0.000337669
9830147E19Rik	NA	0.186394	3.23827	0.00320725	0.0127627
Cdh2	cadherin 2	0.186379	8.05512	8.0902e-05	0.00068117
Gramd3	GRAM domain containing 3	0.185853	4.02722	0.00426629	0.01605
Ginm1	glycoprotein integral membrane 1	0.185695	4.77967	6.33057e-05	0.000560794
Utp11l	NA	0.185312	4.79284	4.52616e-05	0.000431417
Mettl10	NA	0.185187	4.20546	0.000113592	0.000882818
Mrpl42	mitochondrial ribosomal protein L42	0.18499	4.94835	8.06433e-05	0.000679419
Katnbl1	katanin p80 subunit B like 1	0.184966	3.90001	7.94259e-05	0.000671618
Dusp16	dual specificity phosphatase 16	0.184935	4.89078	0.00294585	0.0118817
Rsu1	Ras suppressor protein 1	0.18479	4.12186	7.82632e-06	0.000105859
Rab3d	RAB3D, member RAS oncogene family	0.184742	2.35651	0.00363077	0.0141401
Stx3	syntaxin 3	0.184693	4.92244	0.00213885	0.00917833
Gnpda2	glucosamine-6-phosphate deaminase 2	0.184636	5.19504	0.000182317	0.00127753
Rpl27	ribosomal protein L27	0.184594	6.76824	0.000287179	0.00182767
Pde10a	phosphodiesterase 10A	0.184564	6.02032	0.0100487	0.0317561
Ssu72	Ssu72 RNA polymerase II CTD phosphatase homolog (yeast)	0.184442	6.10798	2.56151e-05	0.000272111
Bnip3l	BCL2/adenovirus E1B interacting protein 3-like	0.184386	6.93601	5.97675e-08	2.70387e-06
Nrg3	neuregulin 3	0.184212	4.93372	6.18545e-06	8.8071e-05
H3f3a	H3.3 histone A	0.184157	7.10579	6.3617e-06	9.02894e-05
Rhbdl3	rhomboid like 3	0.183973	4.57337	0.0169955	0.0483115
Ift81	intraflagellar transport 81	0.183912	6.4678	9.94142e-05	0.000796873
Rap1a	RAS-related protein 1a	0.183767	5.9555	8.27576e-06	0.000110616
Arhgap42	Rho GTPase activating protein 42	0.183732	3.62692	0.0007052	0.0037659
2610001J05Rik	NA	0.183668	4.84175	0.000323335	0.00201467
Taf4b	TATA-box binding protein associated factor 4b	0.183601	2.0062	0.0162773	0.0468245
Abcd2	ATP-binding cassette, sub-family D (ALD), member 2	0.183586	4.76415	0.00107832	0.00532736
Zfp65	zinc finger protein 65	0.183552	4.24323	5.22514e-05	0.000481729
Rnf13	ring finger protein 13	0.183367	6.90537	1.28147e-05	0.000156494
Snrpd1	small nuclear ribonucleoprotein D1	0.183329	5.52839	0.000760916	0.00400403
Nr2e1	nuclear receptor subfamily 2, group E, member 1	0.183262	2.98205	0.00037386	0.00226706
Gng12	guanine nucleotide binding protein (G protein), gamma 12	0.183102	6.10179	7.36535e-05	0.000633676
Kat2b	K(lysine) acetyltransferase 2B	0.183095	4.50972	0.000295593	0.00187126
Rgs7bp	regulator of G-protein signalling 7 binding protein	0.183086	6.03974	0.00746015	0.0249128
Zfp229	zinc finger protein 229	0.183074	3.28072	0.00392188	0.0150045
Mob4	MOB family member 4, phocein	0.183045	6.53679	4.03527e-06	6.33812e-05
4931406C07Rik	RIKEN cDNA 4931406C07 gene	0.183001	4.90501	1.32119e-05	0.000160355
Tarsl2	threonyl-tRNA synthetase-like 2	0.182899	5.92135	0.00473477	0.0173718
Fcf1	FCF1 rRNA processing protein	0.182725	3.97075	0.000164823	0.00119262
Cdkn1b	cyclin-dependent kinase inhibitor 1B	0.182653	6.25865	2.93824e-05	0.000304175
Atp5h	ATP synthase, H transporting, mitochondrial F0 complex, subunit D	0.182648	7.5695	1.83905e-05	0.000208808
Hmgn2	high mobility group nucleosomal binding domain 2	0.182576	6.6129	0.0169706	0.0482755
Zfp626	zinc finger protein 626	0.182529	3.82322	3.56872e-05	0.000357074
Sp3os	trans-acting transcription factor 3, opposite strand	0.182486	2.77646	0.0078831	0.0259752
Ndufa2	NADH:ubiquinone oxidoreductase subunit A2	0.182385	5.18345	0.000276152	0.00177227
Fgf13	fibroblast growth factor 13	0.182269	5.92606	0.000659632	0.00357438
Ccser1	coiled-coil serine rich 1	0.182265	3.91249	0.000136878	0.00102847
Pbx1	pre B cell leukemia homeobox 1	0.182132	8.34006	0.000638144	0.00347578
Spcs1	signal peptidase complex subunit 1 homolog (S. cerevisiae)	0.18209	6.10425	2.2625e-05	0.000246186
Rpp30	ribonuclease P/MRP 30 subunit	0.181856	3.64521	0.000677544	0.00364525
Zfp59	zinc finger protein 59	0.181598	3.67821	0.000229118	0.00152994
Irf1	interferon regulatory factor 1	0.181582	2.99229	0.00705315	0.0237843
1110059E24Rik	RIKEN cDNA 1110059E24 gene	0.18151	4.9324	6.49698e-05	0.000574571
Marcks	myristoylated alanine rich protein kinase C substrate	0.181414	7.98385	6.548e-07	1.581e-05
Zfp825	zinc finger protein 825	0.181345	3.1694	0.000388648	0.00233883
Ankrd49	ankyrin repeat domain 49	0.181191	3.16081	0.000177661	0.00125848
Fra10ac1	FRA10AC1 homolog (human)	0.181157	4.86821	0.000169948	0.00121801
Fam126b	family with sequence similarity 126, member B	0.181143	7.01693	0.000320369	0.00200091
Zfp748	zinc finger protein 748	0.181051	4.31564	0.000107181	0.00084586
Serpinb9	serine (or cysteine) peptidase inhibitor, clade B, member 9	0.181013	3.56031	0.000120632	0.000931139
Fgf9	fibroblast growth factor 9	0.180973	3.77716	0.0170797	0.0484813
Ttpa	tocopherol (alpha) transfer protein	0.180886	2.48492	0.0117833	0.0360788
Hecw1	HECT, C2 and WW domain containing E3 ubiquitin protein ligase 1	0.180822	5.55758	0.000182719	0.00127887
Rnf11	ring finger protein 11	0.180789	7.96325	9.18064e-09	6.43417e-07
Srsf12	serine and arginine-rich splicing factor 12	0.180777	5.24679	2.89095e-07	8.49532e-06
Foxp1	forkhead box P1	0.180551	4.90785	8.42505e-05	0.000702709
Cadm2	cell adhesion molecule 2	0.180546	6.88522	0.000550763	0.00308361
Triqk	triple QxxK/R motif containing	0.180531	4.11504	0.000246019	0.00161522
Parl	presenilin associated, rhomboid-like	0.180506	5.38365	4.70751e-07	1.23447e-05
Serinc1	serine incorporator 1	0.180474	10.1308	8.89599e-09	6.31854e-07
Rpl14	ribosomal protein L14	0.180419	8.56569	5.14548e-05	0.000476047
Ltv1	LTV1 ribosome biogenesis factor	0.180219	4.16639	0.000278331	0.00178409
Arl15	ADP-ribosylation factor-like 15	0.180153	4.18023	0.000135074	0.00101733
Psma3	proteasome subunit alpha 3	0.180117	6.51037	6.9481e-06	9.63669e-05
Ptp4a2	protein tyrosine phosphatase 4a2	0.179875	7.48163	2.24271e-07	7.14735e-06
Igip	IgA inducing protein	0.179845	6.39825	5.00121e-05	0.00046624
Trmt13	tRNA methyltransferase 13	0.179839	2.88274	0.00404438	0.0153729
Chmp2b	charged multivesicular body protein 2B	0.179816	5.78869	2.5429e-07	7.88086e-06
Gstm5	glutathione S-transferase, mu 5	0.179594	6.70512	4.2009e-06	6.51695e-05
Ube2b	ubiquitin-conjugating enzyme E2B	0.179584	7.11066	6.43363e-07	1.55868e-05
Diap2	NA	0.179569	4.4184	0.00142542	0.0066345
Riok2	RIO kinase 2	0.179537	5.06019	1.15757e-05	0.00014471
Slc25a5	solute carrier family 25 (mitochondrial carrier, adenine nucleotide translocator), member 5	0.179493	7.33093	9.94648e-08	3.99374e-06
Pex13	peroxisomal biogenesis factor 13	0.179422	5.59036	6.47776e-06	9.1445e-05
Nqo1	NAD(P)H dehydrogenase, quinone 1	0.179333	2.78105	0.0058941	0.0206131
Clybl	citrate lyase beta like	0.179302	4.257	0.000904073	0.00460438
Nfe2l2	nuclear factor, erythroid derived 2, like 2	0.179154	4.07904	0.00267246	0.0110003
Sqrdl	NA	0.179055	3.14803	0.00586778	0.0205573
Plek	pleckstrin	0.179034	4.4669	0.000170487	0.00121967
Cage1	cancer antigen 1	0.179025	2.47263	0.00405875	0.0154164
l7Rn6	NA	0.178828	5.46133	2.12333e-06	3.80445e-05
Id2	inhibitor of DNA binding 2	0.17861	5.5951	0.0138854	0.0412163
Btbd3	BTB (POZ) domain containing 3	0.178533	6.66034	2.7974e-07	8.29738e-06
Htr5a	5-hydroxytryptamine (serotonin) receptor 5A	0.178503	4.41293	0.000173382	0.00123536
Uqcc2	ubiquinol-cytochrome c reductase complex assembly factor 2	0.178426	5.2586	0.000716202	0.00381437
Arf4	ADP-ribosylation factor 4	0.178171	7.076	1.12741e-06	2.36832e-05
Tlr3	toll-like receptor 3	0.178029	3.5687	0.00377997	0.0145884
Hibch	3-hydroxyisobutyryl-Coenzyme A hydrolase	0.177956	5.00407	4.26627e-06	6.57329e-05
Gpcpd1	glycerophosphocholine phosphodiesterase 1	0.177814	5.70468	0.000405547	0.00241302
Thrb	thyroid hormone receptor beta	0.177766	4.90065	0.0135472	0.04036
Dynll1	dynein light chain LC8-type 1	0.177695	6.76198	0.000469821	0.0027129
Ier3ip1	immediate early response 3 interacting protein 1	0.177607	5.83095	6.38994e-06	9.05279e-05
Gjb2	gap junction protein, beta 2	0.177563	3.12567	0.0127125	0.0384629
Gm14326	predicted gene 14326	0.177538	4.61913	4.68879e-05	0.000442942
Mrpl50	mitochondrial ribosomal protein L50	0.177018	5.57586	1.03109e-05	0.000132131
Med6	mediator complex subunit 6	0.177015	4.28067	0.000243722	0.00160312
Rpl22	ribosomal protein L22	0.176984	6.20112	1.74282e-05	0.000200942
Ust	uronyl-2-sulfotransferase	0.176966	5.1998	0.0148032	0.0433316
Lrch2	leucine-rich repeats and calponin homology (CH) domain containing 2	0.176951	5.80459	0.00184135	0.00815005
Pnpla7	patatin-like phospholipase domain containing 7	0.176795	4.65208	0.00132503	0.00626857
Hsp90b1	heat shock protein 90, beta (Grp94), member 1	0.176732	9.7654	1.69148e-05	0.000195986
Myo1b	myosin IB	0.176714	3.82355	0.0200286	0.0549417
Rpl15	ribosomal protein L15	0.17655	7.53832	3.21659e-07	9.14678e-06
Mgst1	microsomal glutathione S-transferase 1	0.176463	4.38549	0.00456227	0.0168796
Mpc1	mitochondrial pyruvate carrier 1	0.176322	5.12737	2.88113e-05	0.000299437
Hspa13	heat shock protein 70 family, member 13	0.176233	7.19717	1.52409e-05	0.000179747
Sdhaf3	succinate dehydrogenase complex assembly factor 3	0.176182	2.96177	0.00255199	0.010599
Cops2	COP9 signalosome subunit 2	0.176115	7.3673	3.23079e-06	5.32492e-05
Mphosph6	M phase phosphoprotein 6	0.176099	4.15698	8.86505e-05	0.000733178
Unc13b	unc-13 homolog B	0.175954	4.68394	0.0171741	0.048662
Selk	NA	0.175921	7.03301	8.93769e-06	0.000117481
Chac2	ChaC, cation transport regulator 2	0.175861	3.56289	0.000314149	0.00196983
Rpl36	ribosomal protein L36	0.175849	6.40134	0.000569931	0.00317075
Cript	cysteine-rich PDZ-binding protein	0.175767	5.26851	0.000573397	0.00318836
Rnft1	ring finger protein, transmembrane 1	0.175739	3.96524	0.00065505	0.00355198
Tbc1d15	TBC1 domain family, member 15	0.17564	5.6499	1.00345e-05	0.000129533
Sdc2	syndecan 2	0.175395	7.233	1.20795e-05	0.000149708
Entpd1	ectonucleoside triphosphate diphosphohydrolase 1	0.175356	3.4902	0.000594961	0.00328463
Nsmce1	NSE1 homolog, SMC5-SMC6 complex component	0.175193	3.81486	0.000193755	0.00134012
Slc25a16	solute carrier family 25 (mitochondrial carrier, Graves disease autoantigen), member 16	0.175123	4.54505	0.000330565	0.00205326
Fmr1	FMRP translational regulator 1	0.17512	5.66371	6.87361e-06	9.5753e-05
Trnt1	tRNA nucleotidyl transferase, CCA-adding, 1	0.175097	5.63871	6.72691e-06	9.42898e-05
Slc7a8	solute carrier family 7 (cationic amino acid transporter, y system), member 8	0.175009	4.78311	0.00702932	0.0237292
Pibf1	progesterone immunomodulatory binding factor 1	0.174901	4.02224	0.000124534	0.00095382
Ids	iduronate 2-sulfatase	0.174747	9.04015	4.18731e-07	1.12986e-05
Cox6b1	cytochrome c oxidase, subunit 6B1	0.174746	6.81656	4.28849e-05	0.000413674
Ifrd1	interferon-related developmental regulator 1	0.174627	4.50089	4.32618e-05	0.000416149
Nsun6	NOL1/NOP2/Sun domain family member 6	0.174462	2.84649	0.000427581	0.00251952
Pnrc1	proline-rich nuclear receptor coactivator 1	0.174282	5.94185	3.51994e-05	0.000352863
Iqcb1	IQ calmodulin-binding motif containing 1	0.174266	5.9813	0.00013931	0.0010418
Pafah2	platelet-activating factor acetylhydrolase 2	0.174252	2.59938	0.00165614	0.00749046
Herc6	hect domain and RLD 6	0.174136	3.12396	0.0058663	0.0205567
A630072M18Rik	RIKEN cDNA A630072M18 gene	0.174061	1.96603	0.0172649	0.0488756
Ndor1	NADPH dependent diflavin oxidoreductase 1	0.174	3.91279	0.000705853	0.00376812
Lrrc57	leucine rich repeat containing 57	0.173856	4.12899	0.000134046	0.00101199
Mbd2	methyl-CpG binding domain protein 2	0.173792	5.36301	1.93683e-06	3.52232e-05
Fnbp1l	formin binding protein 1-like	0.173697	7.10318	1.40904e-07	5.16557e-06
Gm15446	predicted gene 15446	0.173648	2.65451	0.0222392	0.0595217
Mphosph10	M-phase phosphoprotein 10 (U3 small nucleolar ribonucleoprotein)	0.17352	4.74716	0.000375284	0.00227396
Smim15	small integral membrane protein 15	0.173516	5.10216	8.86906e-05	0.000733178
Tmed2	transmembrane p24 trafficking protein 2	0.173475	6.07362	1.56351e-06	2.98727e-05
Hsd17b7	hydroxysteroid (17-beta) dehydrogenase 7	0.173468	3.85925	0.000239723	0.00158405
Rell1	RELT-like 1	0.17331	3.14734	0.00695242	0.0235097
Echdc1	enoyl Coenzyme A hydratase domain containing 1	0.173277	5.94054	1.60159e-05	0.000187214
Crls1	cardiolipin synthase 1	0.173246	4.10013	2.19972e-05	0.000240949
Tirap	toll-interleukin 1 receptor (TIR) domain-containing adaptor protein	0.172977	1.54273	0.0185764	0.051765
AU041133	expressed sequence AU041133	0.172968	3.06539	0.00184601	0.00816276
Fpgt	fucose-1-phosphate guanylyltransferase	0.172894	4.5868	4.10859e-05	0.000399631
Lcorl	ligand dependent nuclear receptor corepressor-like	0.172872	5.94179	0.00300983	0.0120997
Sra1	steroid receptor RNA activator 1	0.1728	5.12075	4.5261e-06	6.88224e-05
Stard6	StAR-related lipid transfer (START) domain containing 6	0.172733	1.80803	0.0134462	0.0401384
Commd8	COMM domain containing 8	0.172692	5.82894	1.91315e-07	6.45766e-06
Capza2	capping protein (actin filament) muscle Z-line, alpha 2	0.172657	7.70641	5.31966e-06	7.78007e-05
Zfp874b	zinc finger protein 874b	0.172453	4.04873	0.00149916	0.00689675
Galnt7	polypeptide N-acetylgalactosaminyltransferase 7	0.172411	4.54455	0.00624419	0.0215378
Zfp935	zinc finger protein 935	0.172392	3.80737	0.000701862	0.00375187
Zfp397	zinc finger protein 397	0.172389	5.32047	8.8317e-05	0.000730856
1110012L19Rik	NA	0.17234	3.771	0.000396543	0.00237282
Trmt10c	tRNA methyltransferase 10C, mitochondrial RNase P subunit	0.172055	4.12911	0.000166048	0.00119874
Ppp1cb	protein phosphatase 1 catalytic subunit beta	0.172047	8.3411	1.22231e-06	2.51758e-05
Hilpda	hypoxia inducible lipid droplet associated	0.171949	1.89443	0.00724266	0.024294
Mt3	metallothionein 3	0.171938	7.09354	0.00217302	0.00929725
Ap5m1	adaptor-related protein complex 5, mu 1 subunit	0.171822	4.09422	0.000191682	0.00132985
Pcsk2os1	proprotein convertase subtilisin/kexin type 2, opposite strand 1	0.171805	2.56602	0.00394379	0.0150701
Kpna2	karyopherin (importin) alpha 2	0.171786	4.85595	0.0008934	0.00455588
Snapin	SNAP-associated protein	0.171385	5.82149	2.68603e-07	8.10886e-06
Erlec1	endoplasmic reticulum lectin 1	0.171376	6.56071	1.65921e-05	0.000193094
Bmi1	Bmi1 polycomb ring finger oncogene	0.171324	5.81266	7.57802e-06	0.000103206
Mien1	migration and invasion enhancer 1	0.171213	5.3855	0.000102742	0.000819818
Sh3gl2	SH3-domain GRB2-like 2	0.17121	7.35733	6.51763e-05	0.000575872
Ppp1r14c	protein phosphatase 1, regulatory inhibitor subunit 14C	0.171128	4.82216	0.00049548	0.00282711
Slc12a2	solute carrier family 12, member 2	0.17098	6.63376	0.000188117	0.00130855
Sorcs2	sortilin-related VPS10 domain containing receptor 2	0.170907	6.85801	0.00205236	0.00887453
Atpif1	ATPase inhibitory factor 1	0.170863	6.75577	0.000687266	0.00368629
Sub1	SUB1 homolog, transcriptional regulator	0.170839	8.39832	0.000130231	0.000989186
Nucks1	nuclear casein kinase and cyclin-dependent kinase substrate 1	0.170369	7.2155	4.31783e-06	6.62695e-05
Gm14325	predicted gene 14325	0.170357	5.57625	2.36679e-05	0.000254671
Asah1	N-acylsphingosine amidohydrolase 1	0.170326	6.22796	1.85742e-07	6.32681e-06
Tmsb4x	thymosin, beta 4, X chromosome	0.170292	8.17315	0.0020012	0.00868889
Gstk1	glutathione S-transferase kappa 1	0.170154	3.06476	0.00848976	0.0276345
Orc4	origin recognition complex, subunit 4	0.170139	5.41931	3.22407e-05	0.000327583
Eif1ax	eukaryotic translation initiation factor 1A, X-linked	0.169979	5.8678	1.0411e-05	0.000133024
Zfp133-ps	zinc finger protein 133, pseudogene	0.169965	2.12733	0.0122907	0.0374155
Emc2	ER membrane protein complex subunit 2	0.169883	5.84062	2.32652e-05	0.000251544
Zfp958	zinc finger protein 958	0.169737	3.67945	0.00116218	0.00564657
Usp1	ubiquitin specific peptidase 1	0.169673	4.96177	4.64269e-05	0.000439806
Ublcp1	ubiquitin-like domain containing CTD phosphatase 1	0.169653	5.59343	0.00045657	0.00265186
Vps26a	VPS26 retromer complex component A	0.169585	5.95366	1.41409e-06	2.76515e-05
Rpl7	ribosomal protein L7	0.169498	8.26234	4.40202e-05	0.000422312
Zfp599	zinc finger protein 599	0.169442	1.86001	0.0114396	0.0352581
Cfl2	cofilin 2, muscle	0.169399	6.79694	2.59295e-05	0.000274673
Magohb	mago homolog B, exon junction complex core component	0.169296	2.5587	0.00633126	0.0217812
Slc30a4	solute carrier family 30 (zinc transporter), member 4	0.169215	6.01758	5.0564e-05	0.000469993
Hadhb	hydroxyacyl-CoA dehydrogenase trifunctional multienzyme complex subunit beta	0.169118	6.46325	1.48126e-07	5.36457e-06
Prdx3	peroxiredoxin 3	0.169007	5.9567	4.37836e-06	6.70037e-05
Mrpl48	mitochondrial ribosomal protein L48	0.168851	5.88786	0.000226675	0.00151804
Eif1a	eukaryotic translation initiation factor 1A	0.168825	6.28129	2.26729e-05	0.000246307
Elmod1	ELMO/CED-12 domain containing 1	0.168808	7.47712	0.000176481	0.00125236
Orc2	origin recognition complex, subunit 2	0.168657	5.56613	9.62419e-05	0.000780131
Stk24	serine/threonine kinase 24	0.168596	6.54209	0.000346679	0.00213546
Zfp449	zinc finger protein 449	0.168552	3.85342	0.00183716	0.00814138
Eapp	E2F-associated phosphoprotein	0.168331	4.91256	5.42884e-05	0.000496463
Eif2s1	eukaryotic translation initiation factor 2, subunit 1 alpha	0.168258	5.78544	2.03525e-05	0.000226061
Casp3	caspase 3	0.167725	4.01033	6.14592e-05	0.000545963
Msra	methionine sulfoxide reductase A	0.16768	3.05982	0.00499176	0.018085
Atg5	autophagy related 5	0.167668	4.87686	5.10726e-05	0.000473618
Zcwpw1	zinc finger, CW type with PWWP domain 1	0.167605	2.94809	0.0212366	0.0575183
Psip1	PC4 and SFRS1 interacting protein 1	0.167585	8.78104	3.4533e-05	0.000347502
Tram1	translocating chain-associating membrane protein 1	0.167578	5.71445	1.83593e-05	0.000208721
Lamp2	lysosomal-associated membrane protein 2	0.167447	6.8131	7.22661e-06	9.9446e-05
Snx13	sorting nexin 13	0.167282	6.78927	9.24714e-06	0.000121146
Mettl15	methyltransferase like 15	0.167113	2.43244	0.00746989	0.0249243
Cep76	centrosomal protein 76	0.166997	3.32813	0.00903803	0.0291258
Zfp811	zinc finger protein 811	0.166796	3.70555	0.0204657	0.0558601
Anapc10	anaphase promoting complex subunit 10	0.166689	3.99169	0.000219866	0.00148127
Cep57	centrosomal protein 57	0.166573	4.70942	0.0001943	0.00134257
Crot	carnitine O-octanoyltransferase	0.166542	4.78675	0.000163587	0.00118475
Zfp184	zinc finger protein 184 (Kruppel-like)	0.166453	2.16733	0.00938391	0.0300388
Glrx	glutaredoxin	0.166352	4.36912	0.000446572	0.00260717
Zfp606	zinc finger protein 606	0.166321	4.61079	3.95011e-05	0.000387884
Snrnp27	small nuclear ribonucleoprotein 27 (U4/U6.U5)	0.166284	5.59221	0.000614553	0.00337181
Tmem167	transmembrane protein 167	0.166254	5.61446	7.71324e-06	0.000104587
Sri	sorcin	0.166216	5.94654	1.06838e-05	0.00013603
Me1	malic enzyme 1, NADP()-dependent, cytosolic	0.166205	6.54371	2.47829e-07	7.74232e-06
Rwdd2b	RWD domain containing 2B	0.166037	3.18981	0.0033697	0.0132792
Nsa2	NSA2 ribosome biogenesis homolog	0.166017	5.98171	4.34743e-05	0.00041758
Dcdc2a	doublecortin domain containing 2a	0.165986	5.3741	0.00213342	0.00916
Tmem29	transmembrane protein 29	0.16597	4.56028	0.000272996	0.00175915
Slc10a7	solute carrier family 10 (sodium/bile acid cotransporter family), member 7	0.165958	3.29034	0.0024446	0.0102281
Hmgn3	high mobility group nucleosomal binding domain 3	0.16591	5.89538	0.00198876	0.0086562
Eif2s2	eukaryotic translation initiation factor 2, subunit 2 (beta)	0.165819	6.94425	0.00017809	0.00125871
Rab6a	RAB6A, member RAS oncogene family	0.165816	8.98645	1.04099e-06	2.22512e-05
Grm1	glutamate receptor, metabotropic 1	0.165794	6.81141	0.000870453	0.00446618
Zfp617	zinc finger protein 617	0.165632	5.18446	0.000141665	0.00105692
A930017M01Rik	Smg-5 homolog, nonsense mediated mRNA decay factor pseudogene	0.165461	5.59473	5.21293e-05	0.000481163
Strbp	spermatid perinuclear RNA binding protein	0.165406	6.9121	1.02167e-07	4.0666e-06
Ostf1	osteoclast stimulating factor 1	0.165345	3.15714	0.00224952	0.00955232
Nampt	nicotinamide phosphoribosyltransferase	0.165299	6.24938	8.44398e-06	0.00011212
Zfp654	zinc finger protein 654	0.16516	5.07395	0.000143051	0.00106275
Cntln	centlein, centrosomal protein	0.164944	4.86939	0.00101901	0.00508351
Fastkd2	FAST kinase domains 2	0.164909	4.63113	9.53406e-05	0.000776152
Rap2c	RAP2C, member of RAS oncogene family	0.164694	5.36303	4.12925e-06	6.45639e-05
Cep19	centrosomal protein 19	0.164161	5.6471	1.53589e-05	0.000180961
Sumo1	small ubiquitin-like modifier 1	0.16408	7.09847	0.000408218	0.0024245
Tspan14	tetraspanin 14	0.164068	4.96147	0.0174782	0.049312
Gtpbp10	GTP-binding protein 10 (putative)	0.164008	3.87267	0.000522331	0.00295366
Far1	fatty acyl CoA reductase 1	0.163947	6.58925	4.15322e-06	6.47083e-05
Pfdn1	prefoldin 1	0.163888	5.88741	0.000128048	0.00097648
Cd164	CD164 antigen	0.163888	6.97547	1.62248e-06	3.06965e-05
Tmem132d	transmembrane protein 132D	0.16366	4.65822	0.0126519	0.0383014
Cwc15	CWC15 spliceosome-associated protein	0.163654	6.26055	7.74561e-05	0.000658523
Kcnip4	Kv channel interacting protein 4	0.163395	5.97787	0.0166098	0.0474878
Eif5	eukaryotic translation initiation factor 5	0.163389	8.38974	5.76012e-07	1.45278e-05
Matr3	matrin 3	0.163214	9.34925	1.35441e-05	0.00016376
Thoc7	THO complex 7	0.163177	5.78091	0.000228192	0.00152439
Slc11a2	solute carrier family 11 (proton-coupled divalent metal ion transporters), member 2	0.163098	5.89106	0.000262016	0.00170011
Commd10	COMM domain containing 10	0.163044	4.3602	8.13649e-05	0.000683318
Ptges3	prostaglandin E synthase 3	0.162993	7.39338	9.30249e-05	0.000762245
Rtn3	reticulon 3	0.162875	10.2925	5.29727e-09	4.25906e-07
Txndc9	thioredoxin domain containing 9	0.162848	5.8649	0.000155929	0.00113952
Nek3	NIMA (never in mitosis gene a)-related expressed kinase 3	0.162784	2.35663	0.0148218	0.0433621
Usp16	ubiquitin specific peptidase 16	0.16266	4.61965	0.000292971	0.00185987
Acer3	alkaline ceramidase 3	0.162633	4.17027	0.00122351	0.00589928
Txn1	thioredoxin 1	0.162562	5.61771	0.0001604	0.00116486
Rpl19	ribosomal protein L19	0.162542	8.19234	3.29747e-05	0.000333942
Zbtb6	zinc finger and BTB domain containing 6	0.162402	4.45959	0.000177658	0.00125848
Utrn	utrophin	0.162385	5.88758	0.00137869	0.00647396
Snx2	sorting nexin 2	0.162354	6.64088	6.77472e-06	9.4625e-05
Dlgap1	DLG associated protein 1	0.162347	6.81585	0.00085419	0.00440723
Mrpl47	mitochondrial ribosomal protein L47	0.16218	3.87591	0.00188655	0.00829927
Brix1	BRX1, biogenesis of ribosomes	0.161957	5.29188	0.00134428	0.00633481
Bmpr1b	bone morphogenetic protein receptor, type 1B	0.161926	5.27417	0.00397126	0.0151568
Ephx2	epoxide hydrolase 2, cytoplasmic	0.161921	3.3703	0.0034249	0.0134441
Msi2	musashi RNA-binding protein 2	0.161802	7.67899	0.000390703	0.00234752
Ttll7	tubulin tyrosine ligase-like family, member 7	0.161779	7.68393	0.00010534	0.000833825
Magi3	membrane associated guanylate kinase, WW and PDZ domain containing 3	0.161734	6.38913	0.000409482	0.00243004
Tank	TRAF family member-associated Nf-kappa B activator	0.161466	4.55092	0.000166623	0.00120071
0610009B22Rik	RIKEN cDNA 0610009B22 gene	0.161353	4.64922	0.000392706	0.0023552
Eif1	eukaryotic translation initiation factor 1	0.161278	8.39262	7.72564e-06	0.000104587
Slc39a14	solute carrier family 39 (zinc transporter), member 14	0.161268	5.25725	0.000444328	0.0025979
Fam229b	family with sequence similarity 229, member B	0.161143	2.72811	0.0166675	0.0476011
Zfp87	zinc finger protein 87	0.160768	4.16168	0.00021624	0.00146369
Zfand1	zinc finger, AN1-type domain 1	0.160765	4.52527	0.000821154	0.00427697
Rhoa	ras homolog family member A	0.160756	7.61574	1.77785e-07	6.11848e-06
Stox1	storkhead box 1	0.160575	2.5431	0.0106458	0.0333172
Wdpcp	WD repeat containing planar cell polarity effector	0.160566	3.00207	0.0035282	0.0137915
Cir1	corepressor interacting with RBPJ, 1	0.160556	5.26918	5.48148e-05	0.000500411
2810002D19Rik	RIKEN cDNA 2810002D19 gene	0.160471	2.37537	0.0212093	0.057464
Hmgb2	high mobility group box 2	0.16027	3.27702	0.0212212	0.0574864
Rap1b	RAS related protein 1b	0.160233	5.87432	4.83083e-06	7.21844e-05
2007-03-01	NA	0.160225	6.02034	0.00202047	0.00875572
Exosc9	exosome component 9	0.160163	5.26007	0.000845228	0.00437359
Pomp	proteasome maturation protein	0.160065	6.5896	7.29909e-05	0.000629
Slc41a2	solute carrier family 41, member 2	0.160048	5.31138	7.47384e-07	1.74342e-05
Rragd	Ras-related GTP binding D	0.159951	6.57005	5.06224e-05	0.000469993
Tspan6	tetraspanin 6	0.159857	5.54406	0.000467605	0.00270306
9430021M05Rik	RIKEN cDNA 9430021M05 gene	0.159837	3.07185	0.00958926	0.030591
Ndufb3	NADH:ubiquinone oxidoreductase subunit B3	0.159636	6.36014	0.000255236	0.00166572
Ssna1	SS nuclear autoantigen 1	0.159417	4.68305	3.31235e-05	0.000335235
Hecw2	HECT, C2 and WW domain containing E3 ubiquitin protein ligase 2	0.159355	5.32316	0.000944041	0.00477568
Klhl24	kelch-like 24	0.159304	6.38473	1.96884e-05	0.00022054
Pgrmc1	progesterone receptor membrane component 1	0.159227	10.1433	0.000122561	0.000941897
Taf9b	TATA-box binding protein associated factor 9B	0.159224	5.58054	2.78734e-05	0.000292182
Zfand5	zinc finger, AN1-type domain 5	0.159149	7.04785	8.58824e-07	1.91052e-05
Nsmce4a	NSE4 homolog A, SMC5-SMC6 complex component	0.159067	5.39514	1.90198e-06	3.4787e-05
Vbp1	von Hippel-Lindau binding protein 1	0.159051	6.58856	7.33153e-05	0.000631109
Prkrir	NA	0.159024	6.34865	8.71743e-07	1.93654e-05
Eif3m	eukaryotic translation initiation factor 3, subunit M	0.15871	6.0627	7.25348e-06	9.97291e-05
Eif4a2	eukaryotic translation initiation factor 4A2	0.158428	10.0836	1.24902e-05	0.000153552
Cacybp	calcyclin binding protein	0.158367	7.31862	0.00100486	0.00502512
Slx4ip	SLX4 interacting protein	0.158042	3.12513	0.00640594	0.0219904
Scfd1	Sec1 family domain containing 1	0.1579	5.91319	6.36863e-05	0.000563535
Fnip1	folliculin interacting protein 1	0.157877	5.71234	0.00117756	0.00570552
Pfn4	profilin family, member 4	0.157867	3.35413	0.0111253	0.0344705
Arl8b	ADP-ribosylation factor-like 8B	0.157831	7.52499	2.23418e-06	3.95387e-05
Ndufa6	NADH:ubiquinone oxidoreductase subunit A6	0.157687	5.88918	0.000789162	0.00412662
Fam169a	family with sequence similarity 169, member A	0.157501	6.6891	6.96424e-05	0.000606413
Arhgap5	Rho GTPase activating protein 5	0.157375	7.12063	0.00380209	0.0146488
Aldh6a1	aldehyde dehydrogenase family 6, subfamily A1	0.157263	6.8953	2.03275e-05	0.000225942
Rexo2	RNA exonuclease 2	0.157186	5.76897	5.80737e-05	0.000523225
Higd1a	HIG1 domain family, member 1A	0.156982	6.08501	1.31863e-06	2.65385e-05
Ppp2r3c	protein phosphatase 2, regulatory subunit B'', gamma	0.156884	4.78709	0.00010924	0.000858262
Fancl	Fanconi anemia, complementation group L	0.156807	3.38988	0.00764028	0.0253433
Zfp763	zinc finger protein 763	0.156737	4.44552	5.38532e-05	0.000493623
Brcc3	BRCA1/BRCA2-containing complex, subunit 3	0.156708	5.38645	2.59603e-05	0.000274673
Hat1	histone aminotransferase 1	0.156626	4.90842	0.00180354	0.00802333
Tomm22	translocase of outer mitochondrial membrane 22	0.156497	5.55723	0.000218197	0.00147441
Mrpl30	mitochondrial ribosomal protein L30	0.15644	5.40767	0.000161129	0.00116909
Nadk2	NAD kinase 2, mitochondrial	0.15643	6.49095	2.17972e-05	0.000239256
2210408I21Rik	RIKEN cDNA 2210408I21 gene	0.156427	4.11631	0.00431253	0.0161901
Fam96a	NA	0.156427	4.63319	0.000723347	0.00384208
Pnrc2	proline-rich nuclear receptor coactivator 2	0.156342	6.19839	0.00147175	0.00679621
Ugp2	UDP-glucose pyrophosphorylase 2	0.156333	6.74334	9.88016e-06	0.000128272
Snap29	synaptosomal-associated protein 29	0.156327	4.85757	6.16553e-06	8.8071e-05
Swsap1	SWIM type zinc finger 7 associated protein 1	0.156254	3.85398	6.90534e-05	0.000602942
Timm9	translocase of inner mitochondrial membrane 9	0.156053	4.34413	0.00151459	0.00694747
Tcf4	transcription factor 4	0.156039	6.85484	0.000126578	0.000966671
Trmt10a	tRNA methyltransferase 10A	0.15584	3.44541	0.000670878	0.00362169
Kdsr	3-ketodihydrosphingosine reductase	0.155681	5.67841	0.000234835	0.00155825
Zfp870	zinc finger protein 870	0.155584	3.70784	0.000400161	0.00238995
Rps16	ribosomal protein S16	0.155512	7.1617	0.000762588	0.00400884
Bcap29	B cell receptor associated protein 29	0.155379	6.10237	0.00025704	0.00167473
Tceal1	transcription elongation factor A (SII)-like 1	0.155307	6.03381	7.18586e-05	0.000620594
Cnot7	CCR4-NOT transcription complex, subunit 7	0.155202	6.50051	1.31175e-06	2.6462e-05
A830082K12Rik	RIKEN cDNA A830082K12 gene	0.155072	2.82711	0.00665977	0.0227288
Igbp1	immunoglobulin (CD79A) binding protein 1	0.154924	4.54053	0.000174481	0.00124151
Them4	thioesterase superfamily member 4	0.154914	4.45223	0.000381407	0.00230576
Ccnh	cyclin H	0.154908	5.22597	0.000257448	0.00167669
Ccdc160	coiled-coil domain containing 160	0.154791	3.26023	0.00830516	0.0271283
Agbl3	ATP/GTP binding protein-like 3	0.154611	3.97176	0.000630757	0.0034474
Dgka	diacylglycerol kinase, alpha	0.154552	4.16071	0.00729943	0.0244431
Prickle4	prickle planar cell polarity protein 4	0.154341	2.98657	0.00217511	0.00929867
Papss2	3'-phosphoadenosine 5'-phosphosulfate synthase 2	0.154256	4.86179	0.0217054	0.0584977
Gtf2a1	general transcription factor II A, 1	0.154251	5.8149	2.42753e-05	0.00025997
Nfxl1	nuclear transcription factor, X-box binding-like 1	0.154234	4.0936	0.00125712	0.00602467
Zdhhc2	zinc finger, DHHC domain containing 2	0.154222	6.17014	7.32317e-05	0.000630732
Ube2d3	ubiquitin-conjugating enzyme E2D 3	0.154218	8.08735	5.89717e-06	8.51461e-05
Pak1	p21 (RAC1) activated kinase 1	0.154033	8.29326	1.14146e-06	2.39147e-05
Pts	6-pyruvoyl-tetrahydropterin synthase	0.153929	4.45751	0.00187707	0.00827009
Ube2f	ubiquitin-conjugating enzyme E2F (putative)	0.153867	4.80741	0.000174004	0.00123868
Mrpl15	mitochondrial ribosomal protein L15	0.153654	4.79123	0.000780764	0.00409216
Zfp942	zinc finger protein 942	0.153584	4.61858	9.77143e-05	0.000789732
Itga9	integrin alpha 9	0.153402	3.62832	0.00290144	0.0117534
Actr6	ARP6 actin-related protein 6	0.153263	4.71488	0.000273656	0.00176053
Rbm34	RNA binding motif protein 34	0.153234	4.92677	0.00013449	0.00101389
Rit2	Ras-like without CAAX 2	0.153223	8.50429	0.000406624	0.0024167
Zfp933	zinc finger protein 933	0.153217	4.22775	0.000234296	0.00155562
Bzw1	basic leucine zipper and W2 domains 1	0.153119	6.95778	0.000103792	0.000826849
Vamp8	vesicle-associated membrane protein 8	0.153044	3.65855	0.0206065	0.0561574
Cmss1	cms small ribosomal subunit 1	0.152997	3.72373	0.000843487	0.00436744
Fcho2	FCH domain only 2	0.152925	5.43386	0.000667314	0.00360491
Tle4	transducin-like enhancer of split 4	0.1529	6.93025	0.00844159	0.0275059
Pla2g7	phospholipase A2, group VII (platelet-activating factor acetylhydrolase, plasma)	0.152882	7.77363	0.00104462	0.00518838
Nme7	NME/NM23 family member 7	0.152786	3.74923	0.00118459	0.00573781
Psmg2	proteasome (prosome, macropain) assembly chaperone 2	0.152738	4.14689	0.000238658	0.00157833
Ccng1	cyclin G1	0.152721	6.06374	0.000408471	0.00242495
Dse	dermatan sulfate epimerase	0.152678	2.64294	0.010184	0.0321068
Rps6	ribosomal protein S6	0.152521	8.25376	1.49849e-05	0.000177654
2610301B20Rik	NA	0.152484	6.2046	3.14658e-05	0.000321333
Upf3b	UPF3 regulator of nonsense transcripts homolog B (yeast)	0.152346	6.08132	0.00661064	0.0225814
Lrrcc1	leucine rich repeat and coiled-coil domain containing 1	0.152298	4.97213	0.00196635	0.00857753
Sar1b	secretion associated Ras related GTPase 1B	0.152242	5.84146	0.000112457	0.000876147
Gsto1	glutathione S-transferase omega 1	0.152183	4.75053	0.00232053	0.00978563
Eif4g2	eukaryotic translation initiation factor 4, gamma 2	0.152169	9.64336	9.68298e-07	2.11543e-05
Rpl21	ribosomal protein L21	0.151935	9.00353	0.00352679	0.0137894
Hrasls	NA	0.151931	5.15611	0.000627808	0.00343574
Gucy1a2	guanylate cyclase 1, soluble, alpha 2	0.151827	6.35671	0.00746481	0.0249178
Frg1	FSHD region gene 1	0.151674	4.83088	0.00126558	0.00605057
Slc35a5	solute carrier family 35, member A5	0.151646	5.67936	0.000360719	0.00220596
Nxph1	neurexophilin 1	0.151481	6.0732	0.00335971	0.0132506
2410015M20Rik	NA	0.151426	5.49492	0.000327716	0.00203796
Lipa	lysosomal acid lipase A	0.151341	4.85226	0.00059228	0.00327325
Golim4	golgi integral membrane protein 4	0.151324	5.06596	0.00159691	0.00725366
Dcaf13	DDB1 and CUL4 associated factor 13	0.151322	4.72287	0.000130338	0.000989186
Ncald	neurocalcin delta	0.15098	8.13829	0.0168152	0.0479454
Orc5	origin recognition complex, subunit 5	0.150947	4.67324	0.000665143	0.00359563
Golga1	golgi autoantigen, golgin subfamily a, 1	0.150857	5.59576	0.000110244	0.000862298
AU019823	NA	0.150824	4.13497	0.000275731	0.00177029
Lmo2	LIM domain only 2	0.15082	3.38684	0.0111509	0.0345432
Lsm7	LSM7 homolog, U6 small nuclear RNA and mRNA degradation associated	0.150745	4.31945	0.00228194	0.0096589
Atp6v1h	ATPase, H transporting, lysosomal V1 subunit H	0.15072	7.57763	2.58686e-05	0.000274436
Commd6	COMM domain containing 6	0.15061	5.1807	0.000301979	0.00190559
B230118H07Rik	NA	0.1506	5.25008	0.00182629	0.00810724
Ptpn2	protein tyrosine phosphatase, non-receptor type 2	0.150575	4.39641	0.00505757	0.0182559
Zfp655	zinc finger protein 655	0.150471	5.58352	5.70566e-05	0.000515821
Ypel5	yippee like 5	0.150381	6.64556	8.49203e-05	0.000707743
Sfxn3	sideroflexin 3	0.150228	5.64645	0.000529095	0.00298126
Tmem141	transmembrane protein 141	0.150139	3.19822	0.00281888	0.0114699
Skida1	SKI/DACH domain containing 1	0.150122	3.08203	0.00297273	0.0119718
Cox20	cytochrome c oxidase assembly protein 20	0.150021	3.76827	0.00318973	0.01271
Ispd	NA	0.149681	4.09442	0.000402077	0.0023984
Svip	small VCP/p97-interacting protein	0.149604	6.28773	1.9203e-07	6.45766e-06
Cntn3	contactin 3	0.149435	4.3216	0.00933721	0.0299135
Mak16	MAK16 homolog	0.149432	5.03852	0.000166244	0.00119906
Nrep	neuronal regeneration related protein	0.149411	4.83713	0.00818172	0.0268025
Bloc1s2	biogenesis of lysosomal organelles complex-1, subunit 2	0.149373	4.49553	0.00121762	0.00587448
Thumpd3	THUMP domain containing 3	0.149342	4.69889	0.000226762	0.00151804
Mysm1	myb-like, SWIRM and MPN domains 1	0.149046	4.99473	0.00485332	0.0177165
Cdc42	cell division cycle 42	0.148926	8.37605	1.74394e-05	0.000200942
Pacrg	PARK2 co-regulated	0.148895	4.26201	0.00438135	0.0163902
Cnep1r1	CTD nuclear envelope phosphatase 1 regulatory subunit 1	0.148816	5.06968	0.000114445	0.00088784
Ktn1	kinectin 1	0.148785	7.60985	0.0002318	0.00154393
Bpgm	2,3-bisphosphoglycerate mutase	0.148697	6.07772	8.787e-06	0.000115981
Zbtb46	zinc finger and BTB domain containing 46	0.148661	2.35585	0.0183134	0.0512211
Ndufaf5	NADH:ubiquinone oxidoreductase complex assembly factor 5	0.14863	4.90176	0.000964605	0.00486418
Usp38	ubiquitin specific peptidase 38	0.148325	4.9011	5.7878e-06	8.39496e-05
Hs6st2	heparan sulfate 6-O-sulfotransferase 2	0.148317	7.53832	0.00980236	0.0311641
Tspan12	tetraspanin 12	0.148167	4.56559	0.0141601	0.0418514
Lrrtm2	leucine rich repeat transmembrane neuronal 2	0.148144	6.36571	0.00066369	0.00359145
Ankrd29	ankyrin repeat domain 29	0.148103	3.87677	0.00542949	0.0193253
Pdcd5	programmed cell death 5	0.147957	4.90328	0.000676277	0.00364163
Pus3	pseudouridine synthase 3	0.147921	3.51145	0.00242841	0.0101728
Kcna2	potassium voltage-gated channel, shaker-related subfamily, member 2	0.147828	7.55581	0.000706129	0.00376832
Map2	microtubule-associated protein 2	0.147823	10.3764	0.000165368	0.00119547
Elp4	elongator acetyltransferase complex subunit 4	0.147725	5.33035	0.000273515	0.00176047
Znhit3	zinc finger, HIT type 3	0.147704	4.00165	0.00334097	0.0131997
Sft2d2	SFT2 domain containing 2	0.147558	5.64521	0.000964125	0.0048633
Zfp68	zinc finger protein 68	0.147552	5.7051	0.000294973	0.00186883
Mtap	methylthioadenosine phosphorylase	0.147541	4.24267	0.00105786	0.00524591
Rps18	ribosomal protein S18	0.147515	7.215	0.00176484	0.00788083
Ptma	prothymosin alpha	0.147416	9.11486	0.000268571	0.00173558
Fut8	fucosyltransferase 8	0.14733	6.13275	2.87268e-05	0.000298755
Cebpz	CCAAT/enhancer binding protein zeta	0.147173	5.6978	4.49264e-05	0.000428668
Ovca2	candidate tumor suppressor in ovarian cancer 2	0.147103	3.84823	0.00141608	0.00659878
Eef1b2	eukaryotic translation elongation factor 1 beta 2	0.147083	7.19979	0.000400822	0.002393
Taf7	TATA-box binding protein associated factor 7	0.147043	4.35438	0.00335157	0.013235
Cxadr	coxsackie virus and adenovirus receptor	0.147012	4.52969	0.0146954	0.0431039
Gpm6b	glycoprotein m6b	0.146898	9.22558	0.00100001	0.00500448
4930430F08Rik	RIKEN cDNA 4930430F08 gene	0.146824	4.66553	0.000320232	0.00200091
Vamp3	vesicle-associated membrane protein 3	0.146773	5.30124	0.000199421	0.00137153
Ercc5	excision repair cross-complementing rodent repair deficiency, complementation group 5	0.146749	4.90886	0.000142143	0.00105889
Sfmbt2	Scm-like with four mbt domains 2	0.146713	3.05178	0.00832185	0.0271717
Rbbp9	retinoblastoma binding protein 9, serine hydrolase	0.146713	5.61975	1.43735e-05	0.000172041
Arap2	ArfGAP with RhoGAP domain, ankyrin repeat and PH domain 2	0.146651	5.58735	0.00199173	0.00866204
Pex11a	peroxisomal biogenesis factor 11 alpha	0.146638	2.42392	0.0170501	0.0484222
Rb1	RB transcriptional corepressor 1	0.146617	5.14187	0.00161817	0.00733337
Med30	mediator complex subunit 30	0.146565	4.04442	0.00109497	0.00539515
Hunk	hormonally upregulated Neu-associated kinase	0.146488	4.12054	0.00126079	0.00603859
Zfp729a	zinc finger protein 729a	0.146357	4.20503	0.0132821	0.0397371
Slc35g2	solute carrier family 35, member G2	0.146279	5.71261	0.000347584	0.00213796
Fbxo28	F-box protein 28	0.146236	5.9309	8.01278e-06	0.000107829
Alg14	asparagine-linked glycosylation 14	0.146188	3.39452	0.00634907	0.0218283
Ppa2	pyrophosphatase (inorganic) 2	0.146183	4.8474	0.00051735	0.00293282
Hdac1	histone deacetylase 1	0.146012	5.33562	0.000443045	0.00259362
Rpl10	ribosomal protein L10	0.146008	8.26788	3.54179e-05	0.000354828
Fam204a	family with sequence similarity 204, member A	0.145947	5.08433	0.000986197	0.00494472
Snx10	sorting nexin 10	0.145799	6.73193	0.000202331	0.00138612
Zfp931	zinc finger protein 931	0.145772	3.70442	0.00748408	0.0249638
Zfp101	zinc finger protein 101	0.145766	2.5889	0.0154293	0.044842
Fahd1	fumarylacetoacetate hydrolase domain containing 1	0.14573	4.61487	0.00267826	0.0110213
1110008L16Rik	NA	0.145667	3.26979	0.00632008	0.0217571
Phactr2	phosphatase and actin regulator 2	0.145627	5.68288	0.00690463	0.0233877
Plgrkt	plasminogen receptor, C-terminal lysine transmembrane protein	0.14556	3.21018	0.00977991	0.0311144
Ccdc53	NA	0.145465	4.02417	0.00119773	0.00579615
Trappc6b	trafficking protein particle complex 6B	0.145411	6.88744	9.72151e-06	0.000126549
Bccip	BRCA2 and CDKN1A interacting protein	0.145382	6.20361	0.000454565	0.00264506
Ikbip	IKBKB interacting protein	0.145371	4.96756	0.000231632	0.00154391
Gpm6a	glycoprotein m6a	0.145364	10.111	1.53888e-05	0.000180961
Serf2	small EDRK-rich factor 2	0.145299	6.26747	5.13005e-05	0.000475453
Zfp758	zinc finger protein 758	0.145293	3.95711	0.00980762	0.0311746
Scp2	sterol carrier protein 2, liver	0.14518	7.36079	4.21046e-05	0.000407637
Aida	axin interactor, dorsalization associated	0.145084	6.61217	5.2843e-06	7.74942e-05
Zufsp	NA	0.145028	3.51082	0.00843603	0.0274935
Tmx3	thioredoxin-related transmembrane protein 3	0.144965	6.82623	4.07328e-05	0.000397271
Fam133b	family with sequence similarity 133, member B	0.144933	5.58405	0.00172173	0.00772314
Paqr8	progestin and adipoQ receptor family member VIII	0.144785	7.83726	0.0112425	0.0347793
Ghitm	growth hormone inducible transmembrane protein	0.144724	8.71214	1.31711e-09	1.40957e-07
Ccpg1os	cell cycle progression 1, opposite strand	0.144646	2.88728	0.0217465	0.0585689
Fbxo30	F-box protein 30	0.144568	4.31883	0.00319458	0.0127261
Nmt2	N-myristoyltransferase 2	0.14452	6.32308	7.61061e-05	0.000649135
Arpc3	actin related protein 2/3 complex, subunit 3	0.144419	5.82864	0.00011356	0.000882818
Zmat1	zinc finger, matrin type 1	0.144368	5.3032	9.54339e-05	0.000776362
Atp6v0e	ATPase, H transporting, lysosomal V0 subunit E	0.144362	4.43207	0.00239484	0.0100482
Clmn	calmin	0.144338	6.85884	0.000313467	0.00196783
Mfsd8	major facilitator superfamily domain containing 8	0.144331	3.63974	0.00236875	0.00995716
Snx6	sorting nexin 6	0.144216	5.79554	0.000626964	0.00343259
Rnf115	ring finger protein 115	0.144152	5.93558	2.10632e-05	0.000232326
Fam45a	NA	0.144055	5.5336	0.0018344	0.00813464
Zfp462	zinc finger protein 462	0.143851	6.7892	0.0100129	0.0316664
Ppp6c	protein phosphatase 6, catalytic subunit	0.143778	4.82578	0.000211713	0.00143919
Mmgt2	membrane magnesium transporter 2	0.143773	3.39042	0.0180866	0.0507034
Psma6	proteasome subunit alpha 6	0.143768	6.87053	0.000439395	0.00257762
Pdia3	protein disulfide isomerase associated 3	0.143747	8.70373	0.00012335	0.000947036
Zfp260	zinc finger protein 260	0.143743	6.02427	0.000779198	0.00408655
Sypl	synaptophysin-like protein	0.143736	5.41918	0.00487846	0.0177836
Ndufv3	NADH:ubiquinone oxidoreductase core subunit V3	0.143731	5.65022	7.41506e-05	0.000637606
Cyp2j9	cytochrome P450, family 2, subfamily j, polypeptide 9	0.143719	5.71597	0.0186635	0.051971
Ndufaf1	NADH:ubiquinone oxidoreductase complex assembly factor 1	0.14359	4.37274	0.00015851	0.00115432
Pdzd11	PDZ domain containing 11	0.143522	4.78908	0.00010667	0.000842666
Thap1	THAP domain containing, apoptosis associated protein 1	0.143459	3.53584	0.00123429	0.00593682
Gin1	gypsy retrotransposon integrase 1	0.143438	3.12615	0.00336128	0.0132535
Zfp91	zinc finger protein 91	0.143385	6.63409	4.79714e-06	7.18876e-05
Fam50a	family with sequence similarity 50, member A	0.143308	5.17037	0.00483899	0.0176682
Med18	mediator complex subunit 18	0.143275	2.03443	0.0198006	0.0544576
Mrps31	mitochondrial ribosomal protein S31	0.143086	4.72817	0.000263892	0.00170883
Cpe	carboxypeptidase E	0.142739	11.2105	2.62434e-06	4.49372e-05
Idh1	isocitrate dehydrogenase 1 (NADP), soluble	0.142675	6.32206	0.00052336	0.00295631
Erbb2ip	NA	0.142409	7.05576	0.00834552	0.0272433
Hsp90aa1	heat shock protein 90, alpha (cytosolic), class A member 1	0.142354	10.9014	0.0163829	0.047065
Zfp329	zinc finger protein 329	0.142286	5.22734	0.00794956	0.0261774
Cdkl2	cyclin-dependent kinase-like 2 (CDC2-related kinase)	0.142241	6.26669	0.000228067	0.00152439
Krt222	keratin 222	0.142236	4.91147	0.00505904	0.018257
Srbd1	S1 RNA binding domain 1	0.141837	4.25868	0.00386331	0.014845
Cab39l	calcium binding protein 39-like	0.141825	5.60988	0.00160474	0.00728087
Zc3h7a	zinc finger CCCH type containing 7 A	0.141717	5.2262	0.000233129	0.00155018
Acyp1	acylphosphatase 1, erythrocyte (common) type	0.141716	3.70411	0.00673961	0.0229419
Stag2	stromal antigen 2	0.141699	6.93915	0.000188601	0.00131135
Atp1b3	ATPase, Naﲯ transporting, beta 3 polypeptide	0.141688	7.28033	6.9145e-06	9.59848e-05
Mcee	methylmalonyl CoA epimerase	0.141632	3.7152	0.00816685	0.0267815
Esrrg	estrogen-related receptor gamma	0.141609	4.24526	0.0186372	0.0519251
Rhobtb3	Rho-related BTB domain containing 3	0.14159	5.32421	0.000505541	0.00287411
Calm2	calmodulin 2	0.141534	10.0875	0.000972355	0.0048908
Hnrnpc	heterogeneous nuclear ribonucleoprotein C	0.141471	7.97107	0.00203514	0.00880728
B3galt1	UDP-Gal:betaGlcNAc beta 1,3-galactosyltransferase, polypeptide 1	0.141322	4.9158	0.00576975	0.0202812
Hadh	hydroxyacyl-Coenzyme A dehydrogenase	0.141312	4.74432	0.000255121	0.00166565
Orc6	origin recognition complex, subunit 6	0.14114	4.16215	0.0055302	0.0196089
Zfp280d	zinc finger protein 280D	0.141127	5.51693	0.00269316	0.0110568
Bbs5	Bardet-Biedl syndrome 5 (human)	0.140932	3.94573	0.00376165	0.0145319
Ercc6l2	excision repair cross-complementing rodent repair deficiency, complementation group 6 like 2	0.140901	5.27352	0.00225668	0.00957246
Ofd1	OFD1, centriole and centriolar satellite protein	0.140879	4.31968	0.00216464	0.00927394
Zfp955a	zinc finger protein 955A	0.140866	4.38949	0.000463099	0.00268289
Homer1	homer scaffolding protein 1	0.140802	5.04441	0.0104584	0.0328281
Apcdd1	adenomatosis polyposis coli down-regulated 1	0.140772	3.66503	0.0160813	0.0463659
Usp46	ubiquitin specific peptidase 46	0.14077	6.62003	3.70547e-06	5.93437e-05
Wdr17	WD repeat domain 17	0.140684	4.67678	0.00108656	0.00536139
Nsdhl	NAD(P) dependent steroid dehydrogenase-like	0.140574	4.87165	0.000287207	0.00182767
Vimp	NA	0.140497	5.19518	0.000610928	0.00335756
Golph3l	golgi phosphoprotein 3-like	0.140371	5.26523	0.000131768	0.000996692
Arhgap12	Rho GTPase activating protein 12	0.140221	6.49987	0.000889055	0.00454344
B3galt2	UDP-Gal:betaGlcNAc beta 1,3-galactosyltransferase, polypeptide 2	0.140156	5.16023	0.00047104	0.00271598
Skap2	src family associated phosphoprotein 2	0.140065	4.27816	0.00873131	0.0282697
Mff	mitochondrial fission factor	0.140039	7.44922	1.44783e-06	2.82068e-05
Cwf19l2	CWF19-like 2, cell cycle control (S. pombe)	0.139761	5.38014	0.00607615	0.0210914
Rsrc2	arginine/serine-rich coiled-coil 2	0.139716	6.81271	0.00113772	0.005555
1110002L01Rik	RIKEN cDNA 1110002L01 gene	0.139667	3.89544	0.00317075	0.0126439
Yae1d1	Yae1 domain containing 1	0.139618	4.47043	0.000323965	0.00201705
Rps7	ribosomal protein S7	0.139613	8.15945	0.00171733	0.00770779
Cisd2	CDGSH iron sulfur domain 2	0.139528	6.32777	3.87823e-05	0.00038201
Pid1	phosphotyrosine interaction domain containing 1	0.139421	5.59929	0.00363704	0.0141541
Lrrc40	leucine rich repeat containing 40	0.139291	4.85411	0.000231698	0.00154391
Fundc1	FUN14 domain containing 1	0.139274	6.51342	0.000205568	0.00140587
Fbxo8	F-box protein 8	0.139215	4.40147	0.000109433	0.000858687
2610002M06Rik	RIKEN cDNA 2610002M06 gene	0.139181	6.57414	2.68826e-05	0.000283242
Stk3	serine/threonine kinase 3	0.139181	4.83989	0.000594442	0.0032829
Tubg1	tubulin, gamma 1	0.139163	5.58783	0.0145616	0.0428117
Pop4	processing of precursor 4, ribonuclease P/MRP family, (S. cerevisiae)	0.139144	4.21813	0.0179169	0.0502721
Akap5	A kinase (PRKA) anchor protein 5	0.139122	4.67335	0.0158985	0.0459772
Prkab2	protein kinase, AMP-activated, beta 2 non-catalytic subunit	0.139074	4.26927	0.000318667	0.00199343
Eif2a	eukaryotic translation initiation factor 2A	0.13903	5.83489	0.000719056	0.00382442
Dnttip2	deoxynucleotidyltransferase, terminal, interacting protein 2	0.139025	5.0766	0.000697539	0.0037338
Susd5	sushi domain containing 5	0.138954	4.07739	0.00153808	0.00702654
Usp14	ubiquitin specific peptidase 14	0.138886	7.85279	0.000402759	0.00240094
Dnajc10	DnaJ heat shock protein family (Hsp40) member C10	0.138872	7.36853	0.00103109	0.00512921
Syt9	synaptotagmin IX	0.138869	5.51601	0.000334056	0.00207089
Gpx4	glutathione peroxidase 4	0.138861	7.74285	0.000220541	0.00148414
1700066M21Rik	RIKEN cDNA 1700066M21 gene	0.138811	4.63428	0.000169285	0.00121491
Zfp317	zinc finger protein 317	0.138802	5.02736	0.000310963	0.00195528
Mthfd2l	methylenetetrahydrofolate dehydrogenase (NADP dependent) 2-like	0.138752	4.35876	0.000130314	0.000989186
Csde1	cold shock domain containing E1, RNA binding	0.13873	8.50053	4.79959e-06	7.18876e-05
Pramef8	NA	0.138617	4.13472	0.00136321	0.00640901
Sdhaf2	succinate dehydrogenase complex assembly factor 2	0.138603	5.33362	9.80512e-05	0.000791524
Mettl6	methyltransferase like 6	0.138394	3.89246	0.000562753	0.00313522
Rpap2	RNA polymerase II associated protein 2	0.138324	4.81822	5.18633e-05	0.000479486
Cacnb4	calcium channel, voltage-dependent, beta 4 subunit	0.138322	6.51651	0.00115708	0.00562696
Csnk1g1	casein kinase 1, gamma 1	0.138301	4.96851	0.00153848	0.00702654
Dab1	disabled 1	0.138224	6.22155	0.000695319	0.00372318
Rps19	ribosomal protein S19	0.138125	7.03065	0.00166516	0.00752051
Mllt11	myeloid/lymphoid or mixed-lineage leukemia; translocated to, 11	0.138102	8.06795	0.000742578	0.00392711
Cyb5a	cytochrome b5 type A (microsomal)	0.13792	5.16495	0.00135357	0.00637124
Gnpnat1	glucosamine-phosphate N-acetyltransferase 1	0.137918	4.17392	0.00907779	0.0292301
Npm1	nucleophosmin 1	0.137799	8.42706	0.00365209	0.0142056
Gm20300	predicted gene, 20300	0.137761	5.79173	1.35426e-05	0.00016376
Zfp2	zinc finger protein 2	0.137717	4.79574	0.000196256	0.00135163
Map9	microtubule-associated protein 9	0.137695	7.30187	0.000107088	0.000845549
Psme2	proteasome (prosome, macropain) activator subunit 2 (PA28 beta)	0.137595	5.21622	0.00156415	0.00713758
Bbs10	Bardet-Biedl syndrome 10 (human)	0.137536	3.40633	0.0150941	0.0440206
Impad1	NA	0.137527	7.35054	0.00150572	0.00692079
Umps	uridine monophosphate synthetase	0.137427	4.70491	0.000134836	0.00101602
Pnpla8	patatin-like phospholipase domain containing 8	0.13727	7.34993	6.92032e-07	1.64703e-05
Mtrf1	mitochondrial translational release factor 1	0.137213	3.3066	0.00329569	0.0130534
Bivm	basic, immunoglobulin-like variable motif containing	0.137183	4.66638	0.000443232	0.00259362
Sc5d	sterol-C5-desaturase	0.137128	5.8584	0.000715045	0.00380948
Stxbp3	syntaxin binding protein 3	0.137126	4.71184	0.0042671	0.01605
Taf9	TATA-box binding protein associated factor 9	0.137034	5.83103	0.000342249	0.0021134
Reps2	RALBP1 associated Eps domain containing protein 2	0.136997	6.82039	0.000686352	0.00368263
Zfp719	zinc finger protein 719	0.136924	4.51502	0.0018495	0.00817591
Mzt1	mitotic spindle organizing protein 1	0.136901	6.37428	8.93777e-05	0.000737332
Macrod2	mono-ADP ribosylhydrolase 2	0.136887	4.85387	0.000700308	0.00374609
Epb4.1l3	NA	0.136878	8.39158	0.000274645	0.00176546
Pon2	paraoxonase 2	0.136816	5.17557	0.0187988	0.0522793
1700049G17Rik	NA	0.136812	3.78762	0.00841071	0.0274166
Calr	calreticulin	0.136644	9.13135	0.00499326	0.0180856
Gabrg2	gamma-aminobutyric acid (GABA) A receptor, subunit gamma 2	0.136574	7.84379	0.00185204	0.00818151
Zcchc10	zinc finger, CCHC domain containing 10	0.136472	3.38765	0.00719912	0.0241872
Rab39b	RAB39B, member RAS oncogene family	0.136467	6.02554	0.00037982	0.0022988
Txndc16	thioredoxin domain containing 16	0.136419	6.99401	0.000411844	0.00244132
Shpk	sedoheptulokinase	0.136335	2.42891	0.00633066	0.0217812
Gdap2	ganglioside-induced differentiation-associated-protein 2	0.136262	5.06034	0.000772328	0.00405466
Thyn1	thymocyte nuclear protein 1	0.13625	5.41905	0.00221132	0.00941867
Hscb	HscB iron-sulfur cluster co-chaperone	0.136246	2.9947	0.0221023	0.0592548
Nkrf	NF-kappaB repressing factor	0.136225	5.96062	0.000613758	0.00336961
Mrpl44	mitochondrial ribosomal protein L44	0.136138	4.75345	7.93782e-05	0.000671618
Dr1	down-regulator of transcription 1	0.136106	5.58296	6.6222e-05	0.000582524
Zfp954	zinc finger protein 954	0.136099	3.41586	0.00289313	0.0117228
Luzp2	leucine zipper protein 2	0.135966	7.09391	0.00688688	0.0233421
Ccdc43	coiled-coil domain containing 43	0.135966	4.8299	0.000356781	0.00218441
Ap3m1	adaptor-related protein complex 3, mu 1 subunit	0.135863	5.73311	0.000140459	0.00104841
St8sia3	ST8 alpha-N-acetyl-neuraminide alpha-2,8-sialyltransferase 3	0.135738	8.01557	0.000160091	0.00116315
Trappc13	trafficking protein particle complex 13	0.135737	6.54589	0.000214467	0.00145507
Polr1e	polymerase (RNA) I polypeptide E	0.135704	3.17189	0.00474732	0.0174017
Ttc1	tetratricopeptide repeat domain 1	0.135687	5.97301	5.061e-05	0.000469993
Mgea5	NA	0.135605	8.02384	4.18523e-05	0.000406087
Cdo1	cysteine dioxygenase 1, cytosolic	0.135593	4.64748	0.00759769	0.0252252
Paics	phosphoribosylaminoimidazole carboxylase, phosphoribosylaminoribosylaminoimidazole, succinocarboxamide synthetase	0.135587	7.01264	1.32684e-06	2.65845e-05
2002-09-01	NA	0.135557	6.19697	0.00032034	0.00200091
Serp1	stress-associated endoplasmic reticulum protein 1	0.13553	5.42467	9.52217e-05	0.000775832
Vps36	vacuolar protein sorting 36	0.135446	3.94422	0.00152593	0.00698732
Tcea1	transcription elongation factor A (SII) 1	0.13544	6.8001	0.00022257	0.00149566
Nrxn1	neurexin I	0.13534	8.7932	7.96834e-05	0.000673123
B230354K17Rik	RIKEN cDNA B230354K17 gene	0.135334	4.80831	0.0015092	0.00692878
Cept1	choline/ethanolaminephosphotransferase 1	0.135298	5.64349	0.00028282	0.00180483
Yes1	YES proto-oncogene 1, Src family tyrosine kinase	0.135294	4.51026	0.00211421	0.0091022
Aldh1l2	aldehyde dehydrogenase 1 family, member L2	0.135271	3.12534	0.0183889	0.0513872
Wwp1	WW domain containing E3 ubiquitin protein ligase 1	0.13527	5.57415	0.000734449	0.00388931
Fgfr1op	NA	0.135218	4.52391	0.00324881	0.0128967
Nceh1	neutral cholesterol ester hydrolase 1	0.135183	7.05834	0.00088924	0.00454344
Ube2g1	ubiquitin-conjugating enzyme E2G 1	0.135094	5.25502	0.00023503	0.00155889
Ubc	ubiquitin C	0.135093	6.73977	0.00262959	0.0108549
Zik1	zinc finger protein interacting with K protein 1	0.13507	4.7695	0.00490472	0.0178547
Ndufb5	NADH:ubiquinone oxidoreductase subunit B5	0.135042	6.32166	0.00139773	0.00653848
Rabl3	RAB, member RAS oncogene family-like 3	0.134974	3.83373	0.00368653	0.0143045
Pcsk2	proprotein convertase subtilisin/kexin type 2	0.13493	8.75747	0.00331632	0.0131154
Arhgap18	Rho GTPase activating protein 18	0.134867	4.00634	0.0135997	0.0404897
Spred1	sprouty protein with EVH-1 domain 1, related sequence	0.134827	7.54485	0.000443268	0.00259362
Pcmtd2	protein-L-isoaspartate (D-aspartate) O-methyltransferase domain containing 2	0.134823	6.55876	8.67037e-05	0.000720136
Nxt2	nuclear transport factor 2-like export factor 2	0.134815	5.92635	0.000320643	0.00200184
Parp2	poly (ADP-ribose) polymerase family, member 2	0.134691	4.3058	0.00322575	0.0128212
Cyp7b1	cytochrome P450, family 7, subfamily b, polypeptide 1	0.13468	3.9519	0.0163562	0.0470089
Trove2	NA	0.134669	6.68485	0.00742186	0.0248058
Nrcam	neuronal cell adhesion molecule	0.134573	8.08349	0.000406534	0.0024167
Ufl1	UFM1 specific ligase 1	0.134539	6.08886	0.000557873	0.00311639
Rpl28	ribosomal protein L28	0.134534	7.79871	0.000637974	0.00347578
Anxa7	annexin A7	0.13452	6.48141	5.52631e-06	8.06071e-05
Vmp1	vacuole membrane protein 1	0.134497	6.45082	0.000183309	0.0012813
Dnajc24	DnaJ heat shock protein family (Hsp40) member C24	0.134477	3.34571	0.00469134	0.0172475
Znrd1	NA	0.134399	3.14874	0.0112609	0.0348022
Tpm4	tropomyosin 4	0.134381	5.3704	0.000296949	0.0018791
Zfp560	zinc finger protein 560	0.134378	3.00514	0.0112576	0.0347989
Baalc	brain and acute leukemia, cytoplasmic	0.134264	7.20945	0.000181226	0.00127266
Tmem30a	transmembrane protein 30A	0.134049	8.91386	6.78412e-06	9.46728e-05
Smndc1	survival motor neuron domain containing 1	0.134049	5.35209	0.000232618	0.00154744
Nipa2	non imprinted in Prader-Willi/Angelman syndrome 2 homolog (human)	0.134028	5.16914	9.1875e-06	0.000120644
Zfp58	zinc finger protein 58	0.133982	3.35699	0.00566897	0.0200069
Selt	NA	0.133971	8.15695	5.30663e-06	7.76818e-05
1810026B05Rik	NA	0.133964	3.67666	0.00989691	0.0313954
Rps4x	ribosomal protein S4, X-linked	0.133961	8.32025	0.00187982	0.00827759
Acadsb	acyl-Coenzyme A dehydrogenase, short/branched chain	0.133946	6.93558	0.000729766	0.0038684
Zcrb1	zinc finger CCHC-type and RNA binding motif 1	0.133806	5.51713	0.00127285	0.00607981
Cfap97	cilia and flagella associated protein 97	0.133744	5.85052	0.000138829	0.00103869
Gspt1	G1 to S phase transition 1	0.133642	6.99805	9.7032e-06	0.000126549
Gtf3c6	general transcription factor IIIC, polypeptide 6, alpha	0.133603	4.94629	0.000593396	0.00327827
Cep126	centrosomal protein 126	0.133517	4.80325	0.0187006	0.052056
Rpl23a	ribosomal protein L23A	0.13326	8.06366	0.000490119	0.00280253
Psme4	proteasome (prosome, macropain) activator subunit 4	0.133225	5.52656	0.000448744	0.00261696
Psmd14	proteasome (prosome, macropain) 26S subunit, non-ATPase, 14	0.133219	6.53339	0.000131968	0.000997253
Map10	microtubule-associated protein 10	0.133214	3.60844	0.00479178	0.0175241
Gdi2	guanosine diphosphate (GDP) dissociation inhibitor 2	0.133199	8.26134	6.02394e-05	0.000537842
Rbm18	RNA binding motif protein 18	0.133183	5.56103	0.000527941	0.00297582
Vat1l	vesicle amine transport protein 1 like	0.13307	9.16128	0.000279309	0.00178746
Hmox2	heme oxygenase 2	0.133051	6.51963	4.86484e-05	0.000455942
Usp25	ubiquitin specific peptidase 25	0.132989	4.55563	0.00126252	0.00604141
Glt8d1	glycosyltransferase 8 domain containing 1	0.13297	5.65557	0.00227001	0.00961871
1110032A03Rik	RIKEN cDNA 1110032A03 gene	0.13291	4.77867	0.00350711	0.0137226
Vdac1	voltage-dependent anion channel 1	0.132896	8.65867	0.000234256	0.00155562
Rps15a	ribosomal protein S15A	0.132871	7.59235	0.00497208	0.0180336
Cln5	ceroid-lipofuscinosis, neuronal 5	0.132857	4.53636	0.000422345	0.00249421
Nip7	NIP7, nucleolar pre-rRNA processing protein	0.132854	4.18276	0.000689211	0.00369307
Canx	calnexin	0.132721	9.85395	5.23802e-05	0.000482635
Commd1	COMM domain containing 1	0.132627	4.55679	0.00325369	0.0129096
Cnot6l	CCR4-NOT transcription complex, subunit 6-like	0.132574	6.19262	0.000849404	0.0043909
Fam135a	family with sequence similarity 135, member A	0.132528	5.23417	0.00192185	0.00842286
Elovl2	elongation of very long chain fatty acids (FEN1/Elo2, SUR4/Elo3, yeast)-like 2	0.132472	3.63921	0.00601409	0.0209173
Cxxc4	CXXC finger 4	0.132417	6.40639	2.79657e-05	0.000292569
Tbce	tubulin-specific chaperone E	0.132402	5.07744	0.0101676	0.0320744
Slc39a10	solute carrier family 39 (zinc transporter), member 10	0.132385	6.95767	0.00106963	0.00529162
Stag1	stromal antigen 1	0.13237	6.22667	0.00201891	0.00875139
Ankrd28	ankyrin repeat domain 28	0.132285	5.41214	0.00187396	0.00825866
Ptcd3	pentatricopeptide repeat domain 3	0.132223	5.70175	0.00108595	0.00536003
Lsm8	LSM8 homolog, U6 small nuclear RNA associated	0.132104	3.44259	0.00552642	0.0196043
Cep70	centrosomal protein 70	0.132076	4.17692	0.0116203	0.0357109
Ift88	intraflagellar transport 88	0.132068	5.46064	0.00168745	0.00759952
Sfr1	SWI5 dependent recombination repair 1	0.132036	6.90323	0.000103834	0.000826849
Samd8	sterile alpha motif domain containing 8	0.131989	6.29723	3.22433e-05	0.000327583
Ascc3	activating signal cointegrator 1 complex subunit 3	0.131969	5.36338	0.00807035	0.0265145
Gm5595	NA	0.131932	3.38899	0.0173054	0.0489291
Gas7	growth arrest specific 7	0.131797	7.64952	0.0050211	0.0181532
Ube2r2	ubiquitin-conjugating enzyme E2R 2	0.131771	6.79877	5.92423e-05	0.000531035
Zdhhc15	zinc finger, DHHC domain containing 15	0.13169	4.23297	0.00592444	0.020672
Zfp143	zinc finger protein 143	0.131618	3.47846	0.00454281	0.0168234
Tprkb	Tp53rk binding protein	0.131608	6.64278	0.000462953	0.00268289
Rnf2	ring finger protein 2	0.131574	5.01288	0.00188988	0.00830724
Cops3	COP9 signalosome subunit 3	0.131447	6.25869	0.000318641	0.00199343
Mtpn	myotrophin	0.131265	8.13719	0.000215787	0.00146187
Stmn2	stathmin-like 2	0.131255	8.62391	9.01713e-05	0.000741934
Rpl27a	ribosomal protein L27A	0.131126	7.90818	0.000886976	0.0045348
Jrkl	Jrk-like	0.131111	3.98271	0.00402232	0.0153111
Cnih1	cornichon family AMPA receptor auxiliary protein 1	0.131021	6.06866	0.000264198	0.00171011
Grsf1	G-rich RNA sequence binding factor 1	0.13102	7.28811	0.0002198	0.00148127
Appl1	adaptor protein, phosphotyrosine interaction, PH domain and leucine zipper containing 1	0.131009	7.06763	1.0006e-05	0.00012927
Zfp62	zinc finger protein 62	0.130998	5.75148	0.00141143	0.00658486
Ube3a	ubiquitin protein ligase E3A	0.130978	6.99339	0.0181749	0.0508968
Tubb4b	tubulin, beta 4B class IVB	0.130776	8.10029	1.42034e-05	0.000170301
Wdhd1	WD repeat and HMG-box DNA binding protein 1	0.130611	2.84583	0.0218937	0.0588352
Tatdn1	TatD DNase domain containing 1	0.130469	3.46211	0.00567913	0.0200338
Gm14305	predicted gene 14305	0.130461	4.44085	0.003215	0.0127881
Polb	polymerase (DNA directed), beta	0.130271	4.79894	0.00251298	0.010469
Slc35a1	solute carrier family 35 (CMP-sialic acid transporter), member 1	0.13026	4.43177	0.00201813	0.0087504
Rars2	arginyl-tRNA synthetase 2, mitochondrial	0.130258	4.66934	0.00112977	0.00552301
Pde4b	phosphodiesterase 4B, cAMP specific	0.130257	6.42134	0.00117218	0.00568839
Vta1	vesicle (multivesicular body) trafficking 1	0.130237	5.57389	7.37277e-06	0.000101018
Hbp1	high mobility group box transcription factor 1	0.130173	4.8793	0.00683065	0.0232069
Paip2b	poly(A) binding protein interacting protein 2B	0.130093	7.02128	1.73425e-06	3.22783e-05
Appl2	adaptor protein, phosphotyrosine interaction, PH domain and leucine zipper containing 2	0.130066	6.44251	0.012852	0.0387634
Lztfl1	leucine zipper transcription factor-like 1	0.130053	5.48225	0.000950704	0.00480479
Dner	delta/notch-like EGF repeat containing	0.129962	9.12718	0.010738	0.0335263
Copb1	coatomer protein complex, subunit beta 1	0.129859	6.873	0.00106399	0.00526726
Dhx36	DEAH (Asp-Glu-Ala-His) box polypeptide 36	0.129711	7.07855	0.000140368	0.00104823
Dnajb6	DnaJ heat shock protein family (Hsp40) member B6	0.129627	7.33832	2.23696e-05	0.000244016
Zfp868	zinc finger protein 868	0.12936	4.26824	0.000539847	0.00303106
Vamp4	vesicle-associated membrane protein 4	0.129253	7.1693	6.80237e-05	0.000595923
Qk	quaking, KH domain containing RNA binding	0.129109	8.39725	0.0145084	0.0426898
Asns	asparagine synthetase	0.129092	6.36571	0.000169396	0.00121516
Impact	impact, RWD domain protein	0.129086	10.4487	0.00257365	0.010674
Hypk	huntingtin interacting protein K	0.12908	6.41905	0.00483388	0.0176536
Ptrh2	peptidyl-tRNA hydrolase 2	0.129049	4.17157	0.00257606	0.0106752
Dek	DEK proto-oncogene (DNA binding)	0.128993	6.65768	0.000499803	0.0028466
Ppp1r2	protein phosphatase 1, regulatory inhibitor subunit 2	0.128935	7.39858	8.99324e-05	0.000740353
Fam131b	family with sequence similarity 131, member B	0.12887	5.61737	0.0118298	0.0362072
Cdc42bpa	CDC42 binding protein kinase alpha	0.128655	8.40541	0.000199941	0.00137332
Chpt1	choline phosphotransferase 1	0.128609	6.07914	0.0075426	0.0250982
Rfwd2	NA	0.128425	5.61942	0.000187597	0.00130723
Srxn1	sulfiredoxin 1 homolog (S. cerevisiae)	0.128331	6.52359	3.91934e-05	0.000385581
Zfp944	zinc finger protein 944	0.128162	4.11115	0.0190751	0.0528662
Slc4a10	solute carrier family 4, sodium bicarbonate cotransporter-like, member 10	0.12816	7.869	0.000269891	0.00174202
Tmem117	transmembrane protein 117	0.128159	4.24198	0.00750719	0.0250119
Smc5	structural maintenance of chromosomes 5	0.128121	5.54316	0.0068508	0.0232504
C330007P06Rik	NA	0.128032	5.81763	1.90279e-05	0.000214051
Twf1	twinfilin actin binding protein 1	0.128002	6.24848	2.39779e-05	0.000257134
Cyp4v3	cytochrome P450, family 4, subfamily v, polypeptide 3	0.127778	3.66653	0.00983574	0.0312451
Ccz1	CCZ1 vacuolar protein trafficking and biogenesis associated	0.127772	4.7017	0.00270129	0.0110844
Gtf3c3	general transcription factor IIIC, polypeptide 3	0.127744	5.15335	0.000823856	0.00428822
Sugt1	SGT1, suppressor of G2 allele of SKP1 (S. cerevisiae)	0.12768	5.86422	0.000352573	0.00216199
Prpf38a	PRP38 pre-mRNA processing factor 38 (yeast) domain containing A	0.127665	4.49801	0.00114633	0.00558153
[truncated: 13,840 more rows]
