# Supplementary material for: Zinc finger homeobox-3 (ZFHX3) orchestrates genome-wide daily gene expression in the suprachiasmatic nucleus
Source: bioRxiv preprint, doi:10.1101/2023.11.23.568399, version 6 (2025-02-07)
Supplement: Supplementary Table 4 [file 568399_file18.xlsx]

## Sheet: results_chosenmodelBICW0.4
	row.names	sample_1	sample_2	sample_3	sample_4	sample_5	sample_6	sample_7	sample_8	sample_9	sample_10	sample_11	sample_12	sample_13	sample_14	sample_15	sample_16	sample_17	sample_18	sample_19	sample_20	sample_21	sample_22	sample_23	sample_24	sample_25	sample_26	sample_27	sample_28	sample_29	sample_30	sample_31	sample_32	sample_33	sample_34	sample_35	sample_36	sample_37	sample_38	sample_39	sample_40	sample_41	sample_42	sample_43	sample_44	sample_45	sample_46	sample_47	sample_48
feature_125	1700007K13Rik	548.452	599.447	518.414	434.991	432.429	526.691	406.195	455.596	602.356	376.806	406.923	536.376	736.047	787.326	688.615	615.363	533.839	572.905	637.527	578.52	592.861	846.031	553.361	646.658	454.202	478.725	367.321	498.36	428.332	637.727	540.225	466.047	648.741	607.1	672.395	544.816	766.103	553.299	659.332	701.79	471.519	654.013	585.975	524.294	476.267	454.633	573.465	675.75
feature_1433	6530411M01Rik	35.2119	24.1852	19.3027	42.3283	29.7846	21.6583	29.3414	25.9573	21.4461	29.0679	22.3701	22.3025	13.515	15.4567	19.884	18.4917	14.4934	30.4933	26.9509	20.1065	31.7822	23.1156	26.2505	35.4452	17.1802	38.2566	23.9766	24.3361	22.3694	8.57928	15.9182	14.4841	13.93	28.3009	12.767	27.2848	20.8077	19.8222	21.6175	28.8012	42.7002	32.0594	30.9987	25.3335	27.667	40.1421	40.2267	30.0549
feature_1561	9630028B13Rik	57.6195	72.5555	25.7369	22.5151	26.4752	33.472	23.8399	18.7967	59.6762	5.38295	54.3275	24.5328	54.0599	57.9627	199.887	89.3767	107.492	56.3664	186.797	47.5245	130.796	101.709	86.1017	69.1613	146.032	78.5812	72.8888	104.751	289.145	216.389	135.305	92.8687	334.32	216.365	240.445	173.391	276.176	233.558	238.873	459.86	112.656	241.82	183.992	120.059	140.311	155.901	221.715	212.323
feature_1578	A1cf	5.33514	31.959	18.3835	5.40362	38.6097	50.2079	49.5136	53.7048	95.1089	50.5997	73.5019	83.6344	44.7034	44.4381	64.8847	65.7483	41.0645	15.7087	56.6897	28.3319	23.2255	2.31156	11.5502	7.78064	16.1064	37.2227	9.59063	19.0456	47.2242	40.0366	31.8365	22.1522	68.6551	25.5621	25.534	37.8467	22.6994	20.6841	35.6688	60.4826	18.1703	5.4959	12.9994	14.319	18.774	35.4745	28.0651	20.3598
feature_1827	Abat	35998.3	33347	31304.3	31246.4	31081.9	34009.5	30715.9	31513.1	30662.4	28340.2	32809.5	30463	30139.4	32119.1	35419.7	35175.4	35553.4	33266.4	38655	32921.7	35403	36249.9	35593.6	36369.3	29248.2	29067.8	30105	29865.6	31096.7	29443.1	31678.3	31322.3	32638	30484.6	31363.2	32687.2	31979.6	31332.1	34804.1	33180	34039.3	31973.3	32682.6	33051.5	29714.3	35215.9	31939.1	32726.9
feature_1927	Acads	316.907	347.23	551.504	389.961	372.86	321.921	427.284	405.472	308.638	263.765	448.468	381.373	290.052	317.829	297.214	319.496	288.659	358.528	375.453	309.823	399.723	307.437	334.957	325.923	314.612	293.645	351.017	398.9	344.654	298.368	366.119	379.143	333.325	378.867	378.754	315.976	294.146	333.531	375.063	329.294	469.702	414.941	474.979	452.699	382.397	346.343	429.397	425.616
feature_1963	Acot1	707.44	672.866	438.446	491.729	516.267	440.058	474.047	528.098	438.247	369.27	595.472	383.603	394.014	452.109	355.819	334.906	369.581	460.172	391.252	306.168	488.958	598.694	456.759	440.903	427.358	484.929	452.678	618.983	254.348	417.525	403.925	420.891	415.911	530.413	486.21	455.04	439.8	416.267	470.18	400.337	546.926	577.07	628.973	608.005	427.85	447.165	559.432	599.159
feature_2153	Adgrg1	6260.25	6954.1	6391.94	5575.63	6236.02	5090.69	5243.86	6415.04	3828.6	4248.22	6931.55	5048.18	3880.88	4369.42	4757.51	5331.78	5471.24	5859.34	5794.43	5306.3	5481.21	5605.53	6604.63	5688.52	6194.54	5914.27	6448.74	7226.75	5300.71	5547.94	5925.56	5891.62	4945.16	5808.99	5360.01	5956.89	5285.17	5526.1	6078.83	5629.68	7432.56	6096.79	7463.68	7443.66	6298.19	6680.4	6761.83	6498.64
feature_2285	Aim1	131.244	303.178	187.512	102.669	154.439	238.242	190.719	178.121	113.758	73.2081	155.526	159.463	42.6242	35.7437	42.9076	27.7376	36.2334	21.2529	71.5592	45.6967	51.3405	43.9196	33.6007	47.5484	33.2866	90.9887	35.4853	50.7883	31.4828	56.242	88.5452	27.2642	44.7751	38.3431	15.9588	35.2062	22.6994	27.5788	22.6983	32.6414	49.9683	40.3033	10.9995	31.9423	29.6432	12.136	41.1622	39.75
feature_2321	Akirin1	3264.04	4184.9	3238.25	3718.59	3090.98	3417.09	3402.69	3294.79	3492.92	3193.17	3613.31	3552.79	4633.56	3744.39	4732.4	4154.47	4288.83	3517.82	4393.92	3793.74	4175.7	3982.82	3934.43	4149.68	2876.61	2915.78	2864.72	2939.37	3613.89	3408.83	3550.76	3240.18	3847.67	3473.71	3504.54	3391.24	3466.38	3452.52	3499.87	3241.1	2853.65	3494.48	3628.84	2862.69	3241.98	3291.66	3270.53	3183.88
feature_2337	Akr1c21	26.6757	84.6481	32.1711	36.0241	23.1658	10.8292	20.1722	12.5311	0	2.15318	9.5872	12.2664	2.07923	0	1.04653	6.16391	19.3245	1.84808	26.9509	2.7418	19.5583	36.9849	23.1004	19.0194	0	3.10189	0	0	0	2.85976	0	0	0.995001	0	0	0	0	0.861836	0	0	3.63406	7.32787	1.99991	2.20292	1.97621	0.933538	0	0.969513
feature_2490	Angptl4	262.489	199.528	134.199	180.121	176.502	157.515	145.79	157.534	141.731	108.736	133.156	132.7	108.12	113.993	166.398	157.18	228.27	192.2	190.515	224.828	231.032	219.598	285.606	290.477	159.991	146.823	119.883	139.668	157.414	124.876	123.366	167.845	120.395	149.721	134.054	161.068	216.59	137.894	221.579	144.006	287.091	317.846	300.987	218.089	180.823	221.249	210.489	221.049
feature_3432	Bdh1	1650.69	1984.91	1880.63	1682.33	2035.28	2028.01	1957.62	2085.54	1930.15	1928.17	1969.64	2151.08	1809.97	1842.25	1696.42	1798.83	1635.33	1759.37	1695.12	1635.03	1600.11	1643.52	1834.39	1515.5	1820.03	1927.31	1855.79	2048.46	1875.71	1936.06	2135.03	1976.65	1866.62	1921.72	2175.71	1733.03	1716.64	1734.01	1714.26	1590.79	1673.49	1742.2	1654.93	1731.49	1810.21	1788.66	1849.49	1766.45
feature_3882	Capn2	3864.78	3906.77	4128.93	3774.43	3749.56	4053.06	3721.77	3857.8	4539.12	3937.09	3922.23	3792.54	4265.54	4592.58	4663.33	3982.91	3936.15	4681.19	4380.91	4097.16	4487.41	4821.91	4049.93	4459.17	3445.7	3841.17	3768.16	4013.34	4048.02	4166.67	4165.6	4081.11	4393.93	3991.34	4355.68	4278.43	4171.95	4063.56	4333.22	4269.31	4130.11	4090.78	4408.81	3895.86	3728.12	4001.14	4046.06	4235.8
feature_3996	Ccar1	3064.5	2895.31	2972.61	3123.29	2960.81	3649.43	3472.37	2657.49	3795.03	3957.54	3098.8	3222.71	4492.17	4690.15	4823.44	3990.1	3514.64	3905.92	3807.51	3532.35	4151.25	4808.04	3070.26	4030.37	2901.31	3271.46	3215.74	2974.29	4005.77	3286.82	3440.33	3081.71	4423.78	2957.9	3552.42	3548.78	3721.75	3772.26	3725.77	3939.05	2791.87	4012.93	3421.85	2836.26	3193.56	3051.74	3292.98	3207.15
feature_4528	Cenpv	392.666	361.05	432.012	409.774	371.757	378.036	402.527	376.829	353.395	319.747	395.206	380.258	361.786	345.844	414.425	367.78	376.827	369.616	354.078	364.659	411.947	427.638	512.41	397.677	452.054	392.906	366.362	433.817	407.619	422.291	376.068	397.887	411.931	455.553	488.338	407.512	464.391	463.668	447.481	470.42	406.106	499.211	521.977	451.598	435.755	405.156	423.784	434.342
feature_4704	Chpf2	1154.52	1865.71	1793.31	1381.52	1910.63	1425.51	1679.8	2076.59	1280.24	1493.23	2377.63	2003.88	1305.76	1075.21	1472.46	1586.18	1497.65	1189.24	1295.5	1412.94	1290.85	931.558	1477.38	1074.59	2056.26	2060.69	1730.15	2113.01	1521.94	1552.85	1698.28	1945.13	1657.67	1957.33	1672.48	1652.05	1441.41	1537.52	1402.97	1388.22	1740.72	1199.94	1404.94	1757.93	1698.55	1840	1667.07	1515.35
feature_4754	Ciart	428.945	585.627	524.848	505.238	595.693	646.796	716.114	622.081	464.355	561.98	589.08	704.76	374.261	298.508	305.586	287.649	250.01	222.694	262.074	231.225	332.491	362.915	298.206	348.4	616.34	819.932	619.555	567.136	656.168	607.222	521.322	557.212	500.486	479.289	516	439.197	331.032	272.34	287.512	266.892	301.627	311.435	276.988	348.061	432.79	390.219	410.687	284.067
feature_4842	Cldn5	522.844	462.11	448.557	417.88	379.478	275.651	364.017	541.524	311.435	299.292	569.906	257.594	243.27	273.391	327.563	397.572	262.088	315.098	376.383	325.36	614.864	432.261	382.207	400.271	212.605	319.494	250.315	460.269	128.417	194.464	214.896	363.807	448.746	352.392	272.363	293.972	334.816	397.307	321.019	411.858	460.617	337.082	514.978	425.163	457.493	359.412	400.396	509.964
feature_5065	Col3a1	28.8098	49.2341	30.3327	149.5	45.2285	55.1303	27.5076	33.118	34.5003	33.3743	51.1317	18.9571	14.5546	28.0153	29.3028	28.7649	22.9478	23.101	26.9509	30.1598	55.0077	36.9849	34.6507	61.3806	19.3277	14.4755	10.5497	78.2987	9.94194	17.1586	48.7496	18.7441	49.7501	20.0845	45.7484	28.165	33.1032	37.059	38.9114	24.9611	60.8705	48.5471	67.9971	87.0152	19.7621	39.2086	61.7433	29.0854
feature_5243	Creb3l1	1316.71	2592.13	1240.89	1001.47	868.167	1121.31	1135.15	1011.44	432.652	627.652	1418.91	1321.42	266.141	278.221	491.868	252.72	213.777	178.34	276.943	210.205	327.602	305.126	328.656	496.232	475.677	641.057	335.672	326.95	311.514	394.647	514.358	298.202	450.736	289.399	210.656	229.72	279.013	210.288	214.013	223.69	267.104	194.189	372.984	222.495	290.503	182.973	214.231	193.903
feature_5797	Dbp	3426.23	6528.27	4648.26	3220.56	5399.85	5971.79	6595.4	5822.5	3596.42	3721.77	4926.76	5496.46	2274.68	2378.4	2543.06	2776.84	1699.35	1618.92	1879.13	1741.04	2494.91	2253.77	2361.5	2468.19	4427.12	4598.03	4178.64	6092.48	4856.64	4631.86	5149.55	4350.34	3895.43	4255.18	4818.48	3323.47	2824.18	2185.62	2652.46	2458.67	2779.15	2472.24	2238.9	2498.11	3261.74	3403.68	3730.79	2801.89
feature_5994	Dennd2d	107.77	135.61	102.028	72.0482	91.5602	136.841	132.036	78.7671	191.15	90.4335	136.351	197.377	253.666	163.262	318.144	237.31	193.245	77.6194	263.933	175.475	187.026	168.744	163.803	145.239	75.1634	62.0378	48.9122	40.2074	80.364	91.5123	121.377	36.6363	152.235	114.116	80.8577	51.049	108.768	67.2232	25.9409	103.684	32.7066	74.1947	56.9975	55.0729	51.3815	41.0757	58.0013	44.5976
feature_6104	Dkk2	373.46	638.316	277.591	331.422	312.187	507.002	470.379	520.937	134.271	207.782	247.137	256.479	48.8619	58.9287	79.5361	98.6225	57.9734	50.8222	149.624	78.5983	107.571	134.07	64.0512	82.9935	74.0896	150.959	58.5029	60.3111	110.19	61.9615	146.249	19.5961	113.43	45.6466	35.1093	22.0039	44.4529	58.6049	29.1836	45.122	29.0725	39.3873	35.9984	47.3627	24.7026	23.3385	11.2261	22.2988
feature_6201	Dnajc10	5726.74	5844.18	4692.38	5954.79	6209.55	6271.07	5916.88	5319.46	6276.25	6665.17	6137.94	7240.51	7409.33	5943.11	7154.06	6136.17	5961.6	5624.63	6224.72	5932.34	5871.16	6220.4	5768.81	6611.82	5414.99	6120.03	5770.68	5330.66	6770.46	6035.05	6220.05	5222.8	6729.19	5977.88	5456.83	6145.24	5705.11	5877.72	5095.23	5451.12	5005.92	5634.22	5025.78	4609.6	5134.2	5359.44	4832.82	5080.25
feature_6381	Dtx4	2343.19	2298.46	2355.84	2252.41	1960.27	1939.4	2049.31	2072.11	1887.26	1844.2	1913.18	1752.98	2091.7	2026.76	2146.43	2295.03	2491.65	2583.62	2420.93	2582.78	2554.8	2602.82	2535.8	2612.57	2360.13	2190.97	2227.9	2272.78	2202.14	2188.67	2090.26	2062.71	2143.23	1981.97	2106.56	2302.49	2243.45	2354.54	2506.54	2583.47	2630.15	2638.03	2317.9	2661.12	2437.66	2499.08	2324.73	2351.07
feature_6410	Dusp4	2082.84	3121.62	1569.95	840.263	1068.94	1838.99	2058.48	1521.64	379.503	552.291	1464.71	1040.41	387.776	219.292	244.887	401.681	247.595	182.96	328.986	254.987	337.381	325.93	414.758	649.252	650.7	771.336	545.707	475.082	562.548	453.749	531.271	240.266	362.181	308.571	270.235	352.942	350.894	206.841	288.593	291.853	299.81	174.037	171.993	176.233	229.241	221.249	222.65	217.171
feature_7070	F930015N05Rik	116.306	234.942	159.017	123.383	97.0759	128.965	154.959	121.731	185.556	192.71	148.069	172.845	170.497	153.601	356.866	277.376	227.063	122.897	265.791	202.893	224.92	184.925	168.003	193.652	111.671	66.1736	98.7835	62.4273	103.562	80.0733	123.366	95.4247	144.275	139.679	134.054	114.42	170.245	79.289	105.926	192.968	94.4856	106.254	76.9967	102.436	72.1317	94.2874	103.841	98.8903
feature_7083	Fabp7	3810.36	2562.77	1565.35	2933.26	2686.13	1759.25	1564.26	1851.92	1053.66	1832.36	1416.78	1402.83	967.881	892.625	802.687	786.925	1114.78	1058.03	1380.07	976.995	2068.29	2503.42	1674.78	2195.87	1330.39	1478.57	1398.31	1607.24	1222.03	1340.27	1561.98	766.806	1117.39	954.014	839.43	706.764	560.863	908.376	606.37	624.987	1072.96	1219.17	1017.96	956.066	1512.79	1476.86	1197.45	1601.64
feature_7220	Fam19a4	24.5416	25.0489	28.4944	64.8434	49.6411	83.6799	59.5997	63.5507	139.866	62.4422	67.1104	132.7	260.943	136.212	323.377	171.562	89.3757	52.6703	141.26	112.414	102.681	78.593	69.3013	65.7032	31.1391	17.5774	23.0175	55.0207	48.8812	54.3355	48.7496	24.7082	95.5201	61.1664	52.1319	39.607	72.8271	36.1971	22.6983	39.3617	25.4384	31.1435	18.9992	25.3335	33.5956	27.0726	29.0007	25.2073
feature_7557	Fgfrl1	693.568	678.049	672.835	451.202	569.218	462.701	519.893	624.766	359.922	355.275	596.537	452.741	364.904	342.946	429.076	502.358	428.762	593.234	508.349	443.258	608.752	494.674	635.262	528.219	523.996	481.827	497.754	618.983	386.907	395.6	579.026	485.644	561.181	528.588	494.721	428.635	488.036	475.734	501.525	519.383	675.027	535.851	694.97	623.426	551.363	559.189	589.368	525.476
feature_8767	Gm1976	339.315	250.489	316.196	295.398	333.147	316.015	434.619	366.088	443.841	454.321	248.202	346.804	385.697	375.791	309.772	370.862	316.438	351.135	304.823	321.704	283.595	295.88	303.456	347.535	310.317	366.023	309.777	272.987	330.569	312.667	354.181	363.807	327.355	335.046	247.893	325.657	281.85	294.748	254.005	233.29	286.182	316.93	213.991	218.089	298.408	301.533	256.328	258.86
feature_10110	Hif3a	53.3514	79.4656	111.22	45.0301	60.6724	103.369	67.852	98.4589	285.327	92.5867	263.115	278.781	189.21	277.255	239.655	149.988	129.232	151.543	121.744	135.262	74.566	62.4121	169.053	111.523	80.5322	81.6831	73.8479	101.577	301.572	229.734	148.239	230.894	176.115	220.929	246.829	286.931	240.235	106.868	239.954	166.087	131.735	110.834	141.994	144.291	138.335	70.9489	127.229	200.689
feature_10502	Id2	2591.81	2050.56	1664.62	2113.71	1898.5	1677.54	1814.58	2102.54	1856.49	1494.31	1573.37	1630.31	1351.5	1620.06	1613.75	1034.51	1768.19	2074.47	2212.76	1604.87	2302.99	2138.19	2131.54	2186.36	1486.09	1624.36	1834.69	1545.87	1317.31	1412.72	1624.65	1456.08	1584.04	1545.59	1373.52	1284.15	1482.08	1575.44	1437.56	1627.27	2077.77	2235	2103.91	1700.65	1889.26	1626.22	2131.08	1822.68
feature_10700	Il22	53.3514	73.4193	19.3027	22.5151	7.72195	19.6894	6.41843	3.58032	61.541	19.3786	27.6964	18.9571	98.7633	78.2496	163.258	118.142	207.738	83.1636	116.167	115.156	156.466	150.251	69.3013	99.4194	15.0327	22.7472	21.0994	8.46472	17.3984	15.2521	33.8262	4.26003	63.6801	25.5621	21.2783	14.0825	61.4774	36.1971	24.8601	86.4037	29.0725	43.0512	35.9984	16.5219	20.7502	14.0031	25.2586	36.8415
feature_10736	Iltifb	64.0217	64.7817	38.6053	30.6205	5.51568	15.7515	11.9199	5.37048	71.7979	29.0679	15.9787	40.1445	145.546	130.416	197.794	136.633	181.167	72.0751	275.085	116.07	129.574	131.759	121.802	117.574	18.254	22.7472	10.5497	9.52281	28.1688	26.6911	24.8722	1.70401	112.435	46.5595	46.8123	11.442	91.7432	47.401	47.5584	66.2429	14.5362	99.8422	53.9977	26.435	29.6432	30.8068	60.8078	35.872
feature_11085	Kcnh8	453.487	652.136	315.277	326.919	341.972	612.34	507.973	342.816	589.302	438.172	548.601	889.871	910.702	489.785	1125.02	835.209	657.032	327.11	712.804	545.618	597.751	656.483	558.611	650.116	325.35	412.551	246.479	137.552	436.617	445.169	434.767	229.19	614.911	399.864	417.055	316.856	430.342	309.399	292.917	389.777	213.501	348.99	236.99	198.263	174.895	308.068	294.684	254.982
feature_11088	Kcnip3	3201.08	3083.61	3116.92	2651.37	2969.64	2774.23	3096.43	2926.91	2507.33	2175.79	2835.68	2550.29	2037.64	2090.52	2132.82	2281.67	2700.6	2941.22	2777.8	2566.32	2725.94	2600.5	3212.01	2731.01	2594.21	2375.01	2846.5	3136.18	2320.61	2352.63	2760.82	2694.9	2168.11	2594.55	2436.37	2302.49	2336.14	2370.91	2571.4	2126.49	3270.66	2921.07	3120.86	3077.48	2812.15	2785.68	2766.29	2812.56
feature_12037	Lsr	98.1666	73.4193	88.2407	89.1597	80.5289	67.9284	97.1934	93.9835	61.541	35.5275	86.2848	60.2168	34.3073	56.9966	78.4896	65.7483	62.8046	70.227	64.1244	53.0081	119.795	48.5427	75.6015	60.5161	41.8767	38.2566	43.1578	100.519	26.5118	43.8497	51.7342	56.2324	95.5201	97.6837	62.7711	64.2513	79.4478	86.1836	64.8524	81.6035	79.9494	63.2029	91.996	62.7831	55.3339	63.4806	99.1635	73.683
feature_12556	Mfsd10	346.784	526.891	633.311	329.621	424.707	346.533	430.035	419.793	324.489	353.121	500.665	515.188	253.666	294.644	303.493	360.589	338.178	258.731	282.519	327.188	425.393	258.895	368.557	281.832	446.685	561.442	466.105	590.414	371.166	372.722	392.981	382.551	335.315	403.516	434.078	417.193	378.323	346.458	345.879	378.256	387.028	339.83	395.983	443.888	474.291	402.355	448.107	466.336
feature_13874	Mmp14	1497.04	1388.92	1297.87	1358.11	1100.93	763.948	783.049	1019.5	547.342	706.243	937.415	647.888	415.846	483.022	630.01	651.32	789.888	906.483	950.715	687.278	1052.48	1280.6	1062.62	1085.83	1009.34	1017.42	1044.42	1379.75	794.526	769.276	886.446	798.33	630.831	649.095	693.674	950.567	659.227	904.928	885.235	1108.85	1446.36	1420.69	1280.94	1425.29	1141.26	1181.86	1391.1	1277.82
feature_14193	Mthfd1l	690.367	814.522	705.007	791.63	1040.26	943.121	962.765	954.156	906.332	917.255	1010.92	1018.11	1027.14	851.085	828.85	801.308	751.239	695.802	713.733	845.388	624.643	670.352	612.162	670.864	871.895	976.061	877.543	902.551	1089.47	938.955	1082.44	1068.42	862.666	866.372	836.239	919.762	846.497	905.79	783.633	767.073	812.213	713.551	697.97	712.644	828.033	730.027	534.173	610.793
feature_14208	Mtmr14	437.482	480.249	566.211	513.344	461.11	470.576	472.213	494.98	416.801	456.474	494.273	487.31	400.251	405.739	418.611	403.736	455.333	400.109	413.556	455.139	608.752	397.588	476.709	427.935	492.857	546.966	407.602	544.916	420.875	418.478	453.67	516.316	428.846	465.595	420.247	440.077	474.795	500.727	459.371	513.622	522.396	436.924	527.977	529.802	549.387	474.237	561.303	483.787
feature_14834	Nol10	1047.82	1117.7	1083.71	1096.93	981.79	1095.71	1079.21	935.359	1075.1	1095.97	1016.24	1006.96	1289.12	1198.86	1219.2	1128	1181.21	1158.75	1174.69	1154.3	1144.16	1294.47	1125.62	1155.86	1118.86	989.502	1032.91	944.874	1219.54	1020.93	1152.08	1021.56	998.981	1024.31	1087.32	1139.8	1098.08	1243.63	1100.33	1081.97	922.143	1095.52	978.958	927.428	1013.8	927.937	1000.99	1026.71
feature_14932	Nr1d1	5365.02	9839.05	5891.91	4007.68	4371.72	5175.35	5870.11	5013.35	2403.83	2605.35	4554.99	3435.7	2031.41	1985.22	2525.27	2934.02	2678.86	2055.99	3065.89	2266.55	4740.44	3589.85	3836.77	4095.21	5141.18	5506.89	4690.78	4439.75	3627.98	4501.26	4475.01	3219.73	3096.44	3150.53	3849.25	3326.11	2615.16	2246.81	2938.89	3361.11	3387.85	3323.19	2743.88	3094	3871.4	4119.7	4814.11	3805.34
feature_16886	Per1	3361.14	5930.55	3891.78	2469.45	3249.84	4056.01	4765.23	4282.96	2122.23	2250.07	3554.72	3643.12	1680.02	1777.52	1872.24	2128.6	1440.88	1323.23	1473.93	1426.65	1427.76	1527.94	1857.49	1827.59	3806.49	3736.74	2782.24	3232.46	2965.18	3132.39	2936.91	2625.03	2625.81	2512.39	2754.48	2740.8	2216.03	1734.01	2082.84	2224.42	1757.07	1602.06	1544.93	1879.09	1953.49	1961.36	2248.95	1818.81
feature_16887	Per2	1813.95	3784.98	2584.72	1448.17	3146.14	4121.97	4212.32	3104.14	3085.44	2559.05	3726.23	5212.1	3229.04	1545.67	3129.12	3262.76	1083.38	1105.15	1406.09	1121.4	925.352	1000.9	1080.47	1215.51	2097.06	3150.48	2325.73	2247.38	2896.42	2419.36	2973.72	1894.86	3267.58	2038.58	2171.45	2348.25	1720.42	1590.09	1522.95	1676.23	1048.43	996.59	1001.96	1363.61	1306.28	1404.04	1504.29	1348.59
feature_16888	Per3	1062.76	1393.24	2001.04	1319.38	1498.06	1983.71	1897.1	1664.85	1551.58	1411.41	1770.44	2523.53	1258.97	1608.46	1696.42	1630.35	1141.35	1095.91	1097.55	1141.5	1233.4	989.347	931.368	905.148	1681.51	1989.34	1992.93	2189.19	2064.61	2026.62	2085.29	2167.5	1792	1762.87	2450.2	2263.76	1551.12	1542.69	1637.52	1871.12	1385.49	1133.99	1391.94	1793.17	1457.46	1610.35	1966.43	1492.08
feature_17285	Plin4	120.574	68.2368	123.169	58.5392	60.6724	130.934	93.5257	160.219	384.165	86.1272	226.897	163.924	415.846	545.815	350.587	308.195	228.27	328.034	244.416	212.946	168.69	150.251	185.854	136.594	117.04	111.668	113.169	136.494	342.168	276.444	147.244	448.155	241.785	294.877	246.829	333.579	718.813	168.92	398.842	205.449	280.731	190.525	311.986	237.915	108.692	83.0849	127.229	253.043
feature_17288	Plk2	2226.89	2849.53	2372.39	2305.54	2422.48	3047.92	3680.51	2407.77	2391.71	2318.97	2322.23	2889.29	1900.41	1554.37	1587.58	1883.07	1590.65	1522.82	1910.72	1616.75	1655.12	1705.93	1772.43	1907.12	1699.77	2164.08	2110.9	2108.77	2300.73	1868.38	2194.73	1562.58	1835.78	1798.48	1839.51	1858.01	1420.6	1741.77	1649.41	1705.03	1663.49	1643.28	1427.94	1681.93	1333.94	1475.92	1788.69	1362.17
feature_18254	Rad18	163.255	190.89	174.643	188.226	217.318	278.605	223.728	212.134	260.151	283.143	213.049	283.242	293.171	263.73	277.33	240.392	218.608	200.517	224.9	240.364	198.028	256.583	174.303	208.348	237.302	226.438	232.093	175.643	358.738	249.752	279.564	271.79	265.665	270.228	192.569	293.972	225.102	218.045	223.741	254.411	223.495	147.473	170.993	165.219	204.538	241.786	211.424	203.598
feature_18341	Rasd1	1253.76	2685.42	1199.52	1428.36	1587.41	1781.89	1975.04	1219.1	4499.02	1955.09	2761.11	4596.55	8101.71	3212.1	9557.94	8447.63	4648.74	2456.1	5557.45	4349.41	3985	3016.58	3621.52	3288.62	1369.05	1235.59	790.268	726.908	2836.77	2195.34	2187.76	1335.95	5142.17	2719.62	1959.73	1714.54	3522.18	1497.87	1930.44	3719.2	1094.76	3090.53	2013.91	1322.85	1210.43	1191.19	1479.97	1433.91
feature_18357	Rasl11b	4534.87	6904	3656.47	2883.73	2692.75	3614.97	4320.52	3540.94	723.573	732.081	2523.56	1318.08	401.291	335.218	558.846	501.331	404.606	357.604	684.923	388.422	1405.75	1414.67	1074.17	1855.25	1667.55	2083.43	1501.89	1170.25	829.323	967.552	1343.1	574.252	882.566	639.965	498.977	359.103	353.732	284.406	366.416	304.333	589.626	520.279	423.982	371.192	506.898	584.395	771.792	438.22
feature_18410	Rbm3	1414.88	2258.72	2323.67	1810.21	3546.58	3242.84	3059.76	3281.37	2992.2	4898.48	3788.01	3736.79	3343.4	2840.17	2664.46	1932.38	1984.38	2368.31	2138.41	1625.89	2092.74	1883.92	1472.13	1956.4	1642.86	3076.04	2727.58	2292.88	2365.35	2060.93	3650.25	1960.47	3911.35	3552.22	2978.97	2957.32	1956.87	2479.5	1799.65	1376.7	1697.11	1451.83	1239.95	1713.87	2425.8	1820.4	2331.28	1624.9
feature_18586	Rgs16	17325.3	27015.7	13934.7	10067.8	12633.1	20119.6	21049.7	13829.9	5052.89	6426.16	10144.3	10357.3	5067.08	2808.29	5470.2	5254.73	4587.15	2627.97	4971.04	3629.23	9593.35	10644.7	7680.9	9924.64	11190.8	11589.7	9286.61	7128.35	10450.6	8093.12	10426.4	5273.92	11816.6	5280.4	6551.6	5566.1	4179.52	3570.59	3531.21	5420.4	5610.99	6126.1	3727.84	3622.7	5822.91	7377.75	8344.7	5589.24
feature_19424	Sema3e	930.448	1198.03	649.856	778.121	723.657	1248.31	1125.06	548.684	1228.96	943.093	944.872	1583.48	1678.98	755.447	1857.59	1724.87	1103.91	594.158	1584.52	872.806	963.246	762.814	855.767	839.445	811.765	733.08	746.151	531.161	1526.92	1170.6	1157.06	523.132	2041.74	821.639	825.599	910.96	908.92	686.022	612.855	1243.25	509.677	836.293	475.979	467.018	543.458	685.217	653.918	647.635
feature_19534	Serpine1	1279.37	1352.64	849.317	691.663	554.877	736.383	819.725	573.747	213.529	231.467	305.725	422.633	168.417	170.024	164.305	187.999	303.153	153.391	228.618	186.442	476.734	626.432	345.457	536	466.013	492.166	330.877	203.153	332.226	303.135	424.818	223.226	392.031	214.539	157.46	205.956	208.077	157.716	144.837	221.77	218.044	304.107	205.991	92.5225	186.752	253.922	169.326	216.201
feature_19611	Sgk1	628.48	396.464	558.858	654.738	606.724	698.973	865.571	690.107	2129.69	923.714	1218.64	1013.65	1182.04	1812.3	987.922	728.368	795.927	997.039	776.928	730.233	696.765	506.231	790.665	637.148	719.421	563.51	873.707	800.974	1801.98	1245.9	715.325	1956.21	1164.15	1132.95	722.4	761.334	1454.65	662.752	1148.97	776.674	982.105	882.092	1007.96	663.078	609.661	658.144	768.05	885.165
feature_19832	Slc16a9	223.009	175.343	206.814	195.431	152.233	126.012	107.279	165.59	160.38	117.348	159.787	109.282	99.8029	192.243	71.1639	110.95	138.895	182.036	154.27	167.25	182.137	226.533	201.604	183.277	113.819	106.498	142.9	124.855	84.5064	138.222	127.346	134.617	127.36	151.547	95.7525	140.825	135.25	150.821	145.918	112.325	192.605	152.053	148.994	145.393	152.168	199.777	162.778	170.634
feature_20146	Slc8b1	359.588	348.958	460.506	325.118	335.353	318.968	276.909	431.429	239.637	261.611	354.726	238.637	234.953	227.987	281.516	356.479	381.658	373.312	380.1	289.717	328.824	277.387	357.007	345.806	315.686	303.985	302.105	459.211	241.092	275.49	318.365	333.134	241.785	343.262	309.6	291.331	275.23	384.379	352.365	366.736	468.794	362.73	431.981	403.134	385.361	386.485	404.138	353.872
feature_21069	Sult1a1	267.824	90.6944	127.765	171.115	127.964	128.965	131.119	120.836	257.353	95.8165	123.568	112.628	199.606	299.474	190.468	149.988	187.206	184.808	249.063	172.733	243.256	268.141	267.755	246.387	97.7124	89.9548	83.4385	104.751	164.87	165.866	148.239	195.961	200.99	146.982	197.889	142.585	225.102	134.446	276.703	199.689	199.873	254.644	260.989	158.61	127.466	141.898	135.648	160.939
feature_21277	Tagln	184.596	107.97	102.947	106.271	137.892	147.67	125.618	126.206	120.285	114.119	202.396	88.095	96.6841	108.197	48.1403	100.677	106.285	97.9482	55.7604	40.2131	102.681	124.824	73.5014	118.439	44.0243	46.5283	71.9297	105.809	82.8495	139.175	135.305	152.509	276.61	144.243	212.783	165.469	121.063	124.966	76.742	95.0441	118.107	121.826	85.9963	95.8269	63.2388	90.5532	86.0665	157.061
feature_21522	Tef	7554.56	7904.23	8760.65	7998.25	9416.36	9880.13	10919.6	11077.5	8474.95	8641.79	9430.61	9834.3	8068.44	8569.78	7874.07	8988	7262.38	7651.98	6893.84	7741.01	6341.78	6990.15	6972.14	7075.2	9223.62	9592.07	9409.37	10156.6	10393.5	9317.1	10106.1	10490.8	8803.77	10257.7	9099.68	9775.88	8618.19	8435.66	9164.72	7926.1	9088.79	7332.45	8521.63	8724.65	8307.01	8934.89	8339.09	8208.87
feature_22010	Tmem44	763.992	749.741	814.388	676.353	818.526	528.66	853.651	787.671	512.842	565.21	656.191	545.297	422.083	389.316	407.099	433.528	502.436	603.398	564.109	488.954	735.881	656.483	757.065	643.2	577.684	661.736	624.35	791.451	414.247	579.578	659.612	519.724	457.701	516.719	519.191	441.838	431.288	474.01	483.15	554.904	621.424	607.297	482.979	704.934	656.102	612.401	676.37	566.195
feature_22018	Tmem51	801.338	1414.83	851.155	689.862	483.173	516.846	622.588	548.684	335.678	249.769	619.972	374.682	372.182	269.526	606.986	457.156	665.487	421.362	988.818	587.659	1344.63	1074.87	1027.97	1065.95	531.513	506.642	454.596	408.423	340.511	382.255	388.007	307.574	353.226	328.655	562.812	341.5	394.401	311.123	362.092	530.903	540.567	696.148	432.981	418.554	600.768	517.18	820.438	515.781
feature_22400	Trim9	4190.22	3685.65	4122.5	3814.95	3653.58	3375.74	3822.63	3583.01	3591.76	3357.88	3713.44	3247.25	3307.01	3414	3438.89	3606.91	3573.82	3963.21	3804.72	3634.71	4272.27	3647.64	4359.68	4006.17	3564.89	3478.25	3737.47	4076.82	3124.25	3420.27	3341.83	3749.68	2760.13	3327.64	3302.4	3746.82	3575.15	3811.9	4071.65	3900.65	4030.17	3796.75	4376.81	4652.56	3722.19	4314.81	3928.19	4112.67
feature_22530	Tspan9	1217.48	1115.97	1048.78	973.552	1055.7	888.976	889.411	1087.52	692.803	708.396	1006.66	722.602	622.729	634.691	643.614	815.69	901.004	964.698	1023.2	975.167	856.898	975.478	1004.87	903.419	925.584	950.212	1030.03	1021.06	714.162	824.564	914.303	934.651	642.771	903.802	738.358	902.159	874.871	975.599	924.146	822.756	1298.27	1032.31	1258.95	1264.47	989.094	1148.25	1045.89	1101.37
feature_22634	Tuba8	252.886	434.469	249.096	262.976	221.73	241.195	308.085	241.672	450.368	235.773	309.986	338.998	539.56	415.399	875.943	632.828	566.449	354.831	767.635	537.393	653.981	540.905	511.36	466.839	268.441	196.453	192.772	184.108	329.741	293.602	299.462	205.334	426.856	427.252	305.344	191.874	373.594	276.649	298.321	401.297	215.318	362.73	294.987	212.582	226.276	213.78	286.265	182.268
feature_22639	Tubb2b	7426.52	6891.91	6796.37	8046.89	7142.8	5799.51	6050.75	7064.87	5480.88	6588.73	6898.52	5597.93	5826	6541.09	6470.68	7449.08	6927.83	7141.91	6904.07	6213.83	6545.92	6627.24	7694.55	7198.83	6429.69	5640.27	5968.25	6625.76	6256.79	6301.01	6346.4	7466.13	6699.34	6880.77	6551.6	5961.29	6994.24	7171.34	7188.88	6541.72	7587.92	7244.52	8112.65	7784.01	7604.46	7583.13	6822.64	7794.88
feature_23486	Vstm4	274.226	223.713	168.209	325.118	220.627	161.453	155.876	204.078	214.461	142.11	141.678	136.045	134.11	190.311	185.235	118.142	163.05	217.149	210.031	201.065	275.039	316.684	228.904	277.51	146.032	147.857	160.164	255	144.158	176.352	209.922	162.733	179.1	192.629	163.843	183.072	205.24	230.11	201.042	188.168	212.593	234.492	258.989	273.162	242.086	241.786	222.65	236.561
feature_23605	Wee1	937.918	784.291	689.381	897.901	809.701	1047.48	960.014	941.625	1031.28	978.62	954.459	989.117	1115.51	1169.88	1196.18	999.58	923.952	887.078	890.308	1006.24	871.567	876.081	801.166	955.29	1421.66	1221.11	1252.54	1063.38	1528.57	1354.57	1243.61	1139.98	1237.78	1201.42	1338.41	1263.9	1267.38	1186.75	1107.89	1177.97	1006.64	921.48	958.958	903.196	1018.74	1007.29	1077.7	1047.07
feature_24024	Zfp36l2	1673.1	2052.29	1704.15	1309.48	1263.09	1595.82	1232.34	1642.47	1223.36	1043.22	1624.5	1244.48	1057.29	1198.86	1338.51	1328.32	1195.7	1495.1	1349.4	1091.24	1314.07	1278.29	1262.12	1518.95	1349.72	1318.3	1369.54	1578.67	996.679	1153.44	1167.01	1232.85	1209.92	1283.58	1227.76	1323.75	1217.25	1147.1	1421.35	1582.15	1489.06	1225.59	1662.93	1857.06	1243.04	1226.67	1376.13	1420.34
feature_24045	Zfp418	155.786	151.157	130.523	172.916	148.923	128.965	132.036	113.675	179.028	213.165	182.157	168.384	213.121	198.039	194.654	160.262	173.92	153.391	170.999	147.143	158.911	175.678	215.254	152.155	148.179	227.472	191.813	158.713	247.72	211.622	191.019	162.733	135.32	157.937	229.806	192.754	174.974	187.88	156.727	194.888	149.905	163.045	156.993	133.276	153.156	156.834	171.197	151.244
feature_3	0610009B22Rik	941.119	783.427	758.319	999.669	824.042	1009.08	840.814	797.517	1033.14	1014.15	738.215	904.367	1134.22	1095.49	983.736	930.75	979.509	900.939	1046.44	889.257	969.358	1146.53	943.968	1102.26	753.781	800.287	746.151	741.721	743.16	902.731	821.779	771.918	1110.42	849.94	931.991	822.065	897.571	969.566	787.956	795.875	734.989	988.347	961.958	795.253	839.89	881.26	855.987	903.586
feature_13	0610037L13Rik	977.398	945.813	1100.25	1038.4	1012.68	1041.57	947.177	952.366	993.049	1051.83	916.11	1005.84	850.404	910.014	857.106	874.247	1000.04	1076.51	945.139	1013.55	1168.61	1097.99	1015.37	922.439	1032.96	1174.58	958.104	1018.94	1015.73	932.282	906.344	931.243	964.156	981.402	1026.68	873.994	884.329	930.783	840.919	858.277	933.954	1077.2	836.964	997.921	940.677	992.351	1035.6	995.69
feature_17	0610040B10Rik	94.9655	93.2857	59.7463	67.5452	89.3539	122.074	58.6828	98.4589	92.3116	82.8974	83.0891	90.3252	47.8222	48.3022	55.466	31.8469	85.7524	62.8347	78.9939	63.9753	52.5629	60.1005	44.1009	78.671	53.6881	68.2415	72.8888	63.4854	58.8231	48.6159	64.6678	43.4523	56.7151	61.1664	52.1319	47.5284	22.6994	49.9865	22.6983	31.6814	50.8769	68.6988	27.9988	52.87	83.989	52.2781	58.9368	52.3537
feature_29	1110008L16Rik	399.069	352.413	366.75	393.563	392.716	398.71	332.842	397.416	353.395	427.406	379.227	410.366	319.161	305.27	277.33	308.195	434.801	360.376	369.877	339.069	370.385	423.015	359.107	338.026	350.047	425.993	370.198	258.174	385.25	357.47	402.93	276.05	334.32	313.136	387.266	360.864	274.284	287.853	256.167	297.613	297.993	358.15	311.986	292.988	385.361	368.748	334.911	295.701
feature_46	1110046J04Rik	85.3622	75.1468	73.5339	118.88	71.7038	90.5712	76.1043	65.3409	88.5818	96.8931	57.5232	66.9076	68.6145	96.6045	86.8618	64.721	92.999	111.809	93.8633	109.672	102.681	99.397	91.3518	98.5548	63.352	63.0717	65.2163	61.3692	70.422	75.307	92.5247	72.4205	78.6051	62.0794	74.4742	60.7307	65.2607	87.9073	68.095	66.2429	82.6749	68.6988	94.9959	128.871	77.0722	82.1514	57.0658	79.5001
feature_53	1190002N15Rik	1420.21	1003.68	1085.54	1313.98	1306.11	1312.3	1304.78	1290.71	1394.93	1286.52	1395.47	1287.97	1541.75	1668.36	1732	1418.73	1347.88	1507.11	1550.14	1479.66	1364.19	1641.21	1230.62	1548.35	1123.16	1193.19	1510.52	1269.71	1484.66	1249.72	1503.28	1507.2	1319.37	1447.91	1491.61	1662.61	1335.48	1863.29	1619.15	1389.18	1463.62	1414.28	1717.93	1220.42	1584.92	1590.75	1722.26	1299.15
feature_67	1500015A07Rik	123.775	120.062	139.714	148.599	169.883	169.329	157.71	137.842	167.839	133.497	83.0891	157.233	111.239	142.975	135.002	130.469	155.804	114.581	138.472	128.865	138.131	113.266	149.103	134	154.622	166.468	181.263	177.759	154.1	173.492	149.233	154.213	178.105	142.417	178.738	156.668	129.576	142.203	121.058	106.565	135.369	136.482	137.994	143.19	151.18	148.433	145.939	170.634
feature_95	1700001J03Rik	2.13406	1.72751	12.8684	2.70181	5.51568	10.8292	2.75076	3.58032	2.79732	8.61272	3.19573	7.80588	1.03961	0.966045	1.04653	2.05464	0	3.69616	0	7.31147	2.44479	2.31156	3.15006	3.45806	5.36881	5.16981	4.79532	5.29045	0	3.81301	0.994889	5.96404	1.99	0	4.25567	3.52062	1.89161	1.72367	0	0.960042	2.72555	1.83197	1.99991	1.10146	1.97621	1.86708	0.935505	4.84756
feature_99	1700001L05Rik	108.837	93.2857	110.301	110.774	159.955	145.701	81.6058	126.206	96.9738	87.2038	89.4805	134.93	74.8522	89.8422	63.8382	91.4313	97.8302	86.8598	95.722	88.6515	92.9019	67.0352	121.802	93.3677	91.2698	84.7849	125.637	128.029	72.079	110.577	106.453	110.761	73.6301	97.6837	135.117	104.738	75.6645	115.486	86.4698	71.0431	109.93	77.8586	84.9963	101.334	110.668	140.964	78.5824	90.1647
feature_166	1700015F17Rik	11.7373	5.18254	2.75752	2.70181	2.20627	5.90682	1.83384	5.37048	0	1.07659	5.32622	6.69076	2.07923	0	4.18611	0	1.20778	2.77212	0	0	0	0	0	0.864516	1.07376	0	0	0	0.828495	0	10.9438	5.11204	0	3.65173	0	2.64046	0.945807	0.861836	0	0	3.63406	0.915984	0	1.10146	0.988106	0	0	1.93903
feature_176	1700017B05Rik	401.203	544.167	406.275	352.136	443.46	399.694	449.29	527.202	447.571	504.921	672.169	441.59	455.351	485.921	694.894	674.948	508.475	437.995	571.544	520.028	499.959	448.442	565.961	433.987	478.898	434.264	498.713	472.966	453.187	555.747	467.598	535.06	429.841	539.543	550.045	499.048	578.834	522.273	581.51	690.27	588.718	497.379	604.974	731.369	511.839	561.056	566.916	554.561
feature_193	1700019D03Rik	117.373	52.6891	99.2708	71.1476	78.3226	82.6954	101.778	61.7606	103.501	133.497	105.459	101.476	145.546	112.061	92.0944	136.633	83.3368	97.0242	78.9939	116.983	100.236	60.1005	136.503	122.761	99.8599	103.396	99.7426	57.1369	92.7914	105.811	74.6167	83.4966	87.5601	89.4673	103.2	112.66	127.684	89.631	117.815	108.485	153.539	117.246	74.9967	100.233	76.0841	110.158	83.2599	112.463
feature_202	1700020D05Rik	17.0724	14.6839	52.3929	11.7078	2.20627	12.7981	17.4215	8.95081	4.6622	8.61272	12.7829	20.0723	3.11884	14.4907	10.4653	10.2732	2.41556	16.6327	14.8694	6.39753	17.1135	6.93468	8.40016	6.91613	24.6965	38.2566	18.2222	12.6971	17.3984	17.1586	11.9387	28.1162	20.895	8.21639	2.12783	14.9626	14.1871	9.4802	11.8896	13.4406	13.6277	3.66394	9.99957	22.0292	8.89295	12.136	17.7746	19.3903
feature_213	1700021K19Rik	3188.28	3722.79	4005.76	3323.22	3496.94	3561.81	3577.82	3457.7	3496.65	3364.34	4059.65	3786.97	3841.37	3423.66	4147.39	4400	3761.03	3417.1	3503.61	3651.16	3552.28	3261.61	3704.47	3337.9	4015.87	3572.34	3793.09	3862.03	3314.81	3876.88	3468.18	3816.99	3710.36	3469.14	3781.16	4073.36	3957.26	4235.06	4320.25	4573.64	4022.91	3354.33	3876.83	4298.99	3734.05	4045.95	4036.7	4166
feature_321	1700052K11Rik	343.583	316.999	348.367	345.832	296.743	349.487	282.411	324.914	311.435	363.887	336.617	332.308	260.943	260.832	265.818	291.758	281.413	264.275	318.764	318.049	278.706	342.111	325.506	286.155	282.4	320.528	249.356	333.298	304.058	313.62	289.513	301.61	290.54	267.489	284.066	284.29	231.723	246.485	226.983	245.771	329.791	278.459	250.989	281.973	288.527	349.143	348.943	283.098
feature_370	1700084C01Rik	1569.6	1083.15	1012.93	1154.57	1151.67	1160.69	994.857	1099.16	1269.98	1212.24	1010.92	902.137	1176.84	1384.34	1085.25	1109.5	1414.31	1537.6	1362.41	1030.92	1494.99	1742.92	1190.72	1523.28	880.485	1143.56	1161.43	1209.4	955.254	1018.07	1273.46	947.431	1009.93	1188.64	1159.67	1079.07	1071.6	1088.5	1137.08	1152.05	1453.62	1394.13	1290.94	1106.97	966.367	1201.46	1262	1385.43
feature_378	1700086O06Rik	106.703	114.016	186.592	117.078	113.623	120.105	92.6088	139.633	99.7711	111.965	93.7415	98.1311	98.7633	90.8082	94.1875	49.3113	95.4146	99.7963	81.7819	69.4589	99.0139	62.4121	84.0016	82.9935	104.155	87.8868	106.456	88.8796	83.678	105.811	99.4889	96.2767	128.355	114.116	108.52	83.6147	67.1523	66.3614	81.0655	80.6435	81.7664	80.6066	72.9968	92.5225	118.573	101.756	75.7759	60.1098
feature_386	1700093K21Rik	6.40217	12.0926	15.626	4.50301	7.72195	23.6273	11.003	14.3213	14.919	11.8425	9.5872	46.8353	6.23768	6.76231	11.5118	7.19122	4.83112	2.77212	1.85868	9.13933	8.55676	0	3.15006	11.2387	1.07376	10.3396	4.79532	3.17427	8.28495	8.57928	2.98467	15.3361	14.925	4.56466	23.4062	7.92139	0	6.89469	0	3.84017	0.908515	10.0758	4.99978	6.60875	5.92863	3.73415	0	1.93903
feature_412	1700109H08Rik	19.2065	54.4167	73.5339	42.3283	18.7533	43.3166	29.3414	34.0131	26.1083	27.9913	49.0013	53.526	22.8715	18.3548	34.5354	31.8469	26.5712	17.5568	18.5868	36.5573	52.5629	20.804	27.3005	19.8839	33.2866	61.0038	52.7485	44.4398	26.5118	29.5509	23.8773	23.8562	54.7251	45.6466	32.9814	28.165	26.4826	22.4077	15.1322	40.3217	19.9873	17.4037	14.9993	12.116	34.5837	28.9397	43.9687	27.1464
feature_460	1810010D01Rik	1.06703	12.0926	15.626	1.80121	3.30941	1.96894	1.83384	8.95081	0.93244	3.22977	4.26098	2.23025	1.03961	0	0	7.19122	0	2.77212	0	3.65573	3.66718	0	2.10004	1.72903	3.22129	5.16981	5.75438	0	2.48548	9.53254	2.98467	8.52006	3.98001	4.56466	9.57525	5.28093	1.89161	2.58551	7.56611	1.92008	2.72555	0	0	2.20292	5.92863	1.86708	3.74202	5.81708
feature_463	1810011O10Rik	10.6703	13.8201	16.5451	10.8072	13.2376	12.7981	20.1722	10.741	65.2708	19.3786	6.39147	22.3025	36.3865	50.2343	32.4424	7.19122	21.74	27.7212	21.3748	8.2254	15.8911	18.4925	7.35014	4.32258	9.66386	8.2717	6.71344	17.9875	15.7414	15.2521	22.8825	38.3403	38.8051	19.1716	18.0866	21.1237	21.7536	17.2367	28.1027	29.7613	26.3469	26.5635	20.9991	12.116	12.8454	18.6708	15.9036	21.3293
feature_490	1810062O18Rik	11.7373	44.0516	22.9794	19.8133	24.269	44.3011	21.0891	29.5377	8.39196	26.9147	37.2836	52.4109	10.3961	10.6265	21.9771	13.3551	18.1167	29.5693	12.0814	15.5369	8.55676	18.4925	24.1505	21.6129	13.9589	17.5774	17.2631	28.5684	17.3984	28.5976	27.8569	16.1881	28.855	18.2586	27.6618	26.4046	12.2955	22.4077	15.1322	18.2408	18.1703	11.9078	21.999	8.81167	35.5718	22.4049	21.5166	14.5427
feature_509	2010111I01Rik	325.444	353.276	460.506	382.756	327.631	373.114	441.955	296.272	393.49	363.887	357.922	371.337	321.241	367.097	295.121	323.605	369.581	300.313	356.866	366.487	422.948	307.437	391.658	339.755	395.145	557.306	363.485	486.721	410.105	376.535	327.319	398.739	354.221	368.824	372.371	360.864	334.816	268.031	306.968	339.855	354.321	372.805	344.985	383.308	312.241	356.612	382.622	348.055
feature_515	2010320M18Rik	208.07	304.906	274.833	308.907	276.887	207.723	232.897	285.531	248.961	254.075	229.028	229.716	148.665	176.786	190.468	222.928	303.153	243.023	252.78	242.192	299.487	268.141	330.756	274.916	223.343	249.185	220.585	307.904	268.432	224.968	228.825	230.042	226.86	251.056	262.787	207.717	164.57	206.841	174.021	153.607	256.201	243.652	282.988	263.249	306.313	229.65	258.199	245.287
feature_529	2210406O10Rik	42.6811	54.4167	62.5038	47.732	66.1881	63.9905	43.0952	42.0688	64.3384	47.37	51.1317	66.9076	44.7034	50.2343	34.5354	48.2839	37.4412	34.1895	45.5377	46.6106	51.3405	32.3618	66.1513	69.1613	48.3193	71.3434	75.766	59.253	67.1081	49.5692	58.6985	61.3445	57.7101	44.7337	75.5381	52.8093	37.8323	56.0194	49.7201	42.2418	46.3343	42.1353	31.9986	63.8846	61.2626	49.4775	73.9049	54.2927
feature_531	2210408F21Rik	183.529	156.34	182.916	241.362	162.161	129.95	226.479	161.115	253.624	212.088	183.222	188.456	184.012	236.681	188.375	200.327	195.66	226.39	216.536	243.106	182.137	189.548	183.754	177.226	177.171	179.91	162.082	155.539	137.53	142.988	147.244	221.522	196.015	146.069	120.223	160.188	196.728	216.321	221.579	215.049	208.05	245.484	251.989	178.436	171.93	257.657	146.874	206.506
feature_532	2210408I21Rik	728.78	579.581	616.766	663.744	736.894	754.103	648.262	570.166	663.897	884.957	603.994	653.464	921.098	814.376	669.778	595.844	632.877	657.917	633.81	592.229	629.533	714.272	537.61	730.516	565.873	594.529	647.368	457.095	627.999	611.036	733.233	621.113	622.871	577.886	691.546	735.81	565.592	676.542	579.348	595.226	567.822	612.793	509.978	404.235	562.232	589.996	585.626	554.561
feature_595	2410002F23Rik	2460.57	2988.6	2685.83	2916.15	3225.57	2847.08	2814.02	3075.5	2409.42	2654.87	2829.29	2729.83	2731.07	2297.25	2583.88	2666.92	2645.04	2511.54	2448.81	2495.04	2395.89	2256.08	2654.45	2589.23	3191.22	3136.01	2883.9	2666.39	2859.96	3013.23	2887.17	2878.93	2794.96	2979.81	2890.66	2800.65	2701.22	2831.13	2460.07	2630.51	2654.68	2684.75	2706.88	2917.76	3213.32	3047.07	2782.19	2700.09
feature_654	2700054A10Rik	164.322	248.762	216.925	185.524	241.587	238.242	238.399	221.085	201.407	166.871	182.157	297.739	208.962	188.379	223.957	209.573	172.713	153.391	238.84	217.516	183.359	177.99	165.903	147.832	269.514	249.185	283.883	199.979	260.976	205.903	283.543	244.526	203.975	199.932	240.445	243.803	201.457	180.986	203.204	241.93	195.331	190.525	161.993	189.451	233.193	231.517	211.424	196.811
feature_665	2810002D19Rik	271.025	190.89	204.976	190.027	136.789	208.707	187.968	190.652	217.259	186.25	182.157	170.614	175.695	189.345	213.492	206.491	217.4	257.807	197.949	219.344	147.91	270.452	168.003	212.671	210.458	143.721	185.099	212.676	166.527	179.212	140.279	152.509	159.2	139.679	186.185	145.226	170.245	218.906	181.587	189.128	179.886	190.525	166.993	159.711	227.264	239.919	216.102	169.665
feature_671	2810029C07Rik	269.958	257.399	281.267	269.28	232.762	219.537	274.159	224.665	273.205	276.684	240.745	274.321	176.734	213.496	170.584	187.999	264.504	196.821	215.607	303.426	271.371	277.387	190.054	222.181	271.662	246.083	272.374	240.186	174.812	227.828	234.794	213.002	223.875	230.972	236.19	299.253	179.703	175.815	159.969	181.448	220.769	238.156	201.991	237.915	218.371	247.388	298.426	168.695
feature_672	2810032G03Rik	155.786	126.972	119.493	172.916	155.542	143.733	196.221	141.423	250.826	179.791	161.917	165.039	217.279	260.832	222.91	182.863	213.777	256.883	213.748	196.496	198.028	240.402	232.055	177.226	180.392	161.298	127.555	148.133	181.44	186.838	200.968	149.101	177.11	159.763	180.866	198.035	197.674	232.696	226.983	205.449	175.343	218.92	170.993	134.378	144.263	164.303	172.133	168.695
feature_674	2810049E08Rik	42.6811	41.4603	45.0395	44.1295	30.8878	42.3322	55.932	58.1802	55.9464	66.7486	40.4793	50.1807	42.6242	43.472	21.9771	23.6283	31.4023	39.7337	33.4562	22.8483	57.4525	13.8694	55.6511	31.9871	30.0654	48.5963	38.3625	5.29045	53.0237	38.1301	35.816	41.7483	30.845	36.5173	52.1319	36.9665	20.8077	28.4406	29.1836	24.001	16.3533	22.8996	45.998	33.0438	41.5004	24.272	33.6782	19.3903
feature_681	2810410L24Rik	440.683	564.897	559.777	382.756	348.591	374.098	373.186	461.862	294.651	303.598	532.622	410.366	321.241	319.761	415.471	383.19	420.307	315.098	354.078	403.958	513.405	365.226	405.308	437.445	490.71	534.559	447.883	469.792	406.791	401.32	441.731	394.479	403.971	436.381	526.639	410.152	396.293	378.346	353.445	407.058	432.453	438.756	389.983	422.96	450.576	405.156	491.14	479.909
feature_687	2810454H06Rik	46.9492	31.0952	35.8478	23.4157	36.4035	36.4254	24.7568	33.118	22.3786	36.6041	17.0439	27.8781	8.31691	6.76231	7.32569	15.4098	38.649	26.7972	39.9616	19.1926	44.0062	36.9849	15.7503	26.8	20.4015	69.2755	39.3216	10.5809	18.2269	16.2053	21.8876	16.1881	13.93	26.475	18.0866	25.5245	13.2413	17.2367	7.56611	9.60042	22.7129	21.9836	17.9992	35.2467	33.5956	44.8098	17.7746	18.4207
feature_692	2900005J15Rik	55.4855	114.88	143.391	56.738	40.816	53.1613	75.1873	43.859	59.6762	31.2211	84.1543	72.4832	28.0696	42.506	79.5361	59.5844	82.129	51.7462	67.8418	70.3729	97.7915	34.6734	88.2017	49.2774	50.4668	63.0717	50.8303	130.145	43.0817	44.8029	35.816	55.3804	46.7651	60.2535	50.0041	26.4046	43.5071	50.8484	35.6688	37.4416	32.7066	30.2275	36.9984	72.6963	56.322	49.4775	53.3238	52.3537
feature_709	3010026O09Rik	616.742	968.271	676.512	698.868	743.513	671.408	636.342	630.137	531.491	636.265	655.125	757.171	576.986	511.038	534.776	597.899	654.617	583.993	633.81	622.389	556.189	617.186	784.365	705.445	747.339	697.925	651.204	736.431	804.468	745.444	695.428	690.977	663.666	740.388	811.769	636.352	583.563	614.489	593.399	601.946	664.125	724.543	583.975	617.918	708.472	793.507	710.048	642.787
feature_717	3110021N24Rik	35.2119	25.9127	45.9587	37.8253	35.3003	52.1769	33.926	56.3901	42.8922	45.2168	42.6098	20.0723	44.7034	25.1172	17.791	20.5464	42.2723	40.6578	26.0215	23.7623	26.8927	43.9196	24.1505	31.1226	21.4753	46.5283	23.0175	25.3942	45.5672	30.5041	26.862	41.7483	16.915	36.5173	35.1093	22.0039	35.9407	29.3024	20.5366	22.081	31.798	15.5717	18.9992	28.6379	33.5956	23.3385	22.4521	20.3598
feature_727	3110062M04Rik	86.4293	130.427	134.199	108.072	84.9414	122.074	102.695	96.6687	93.244	99.0463	86.2848	99.2462	97.7237	90.8082	122.444	111.978	94.2068	85.9357	73.4178	113.328	172.358	101.709	118.652	89.9097	153.548	105.464	131.392	171.411	101.076	129.642	92.5247	103.945	111.44	120.507	103.2	101.218	121.063	112.901	84.3081	111.365	122.65	126.406	128.994	125.566	131.418	100.822	118.809	127.976
feature_742	3830408C21Rik	131.244	116.607	203.137	108.973	126.861	126.997	127.452	141.423	105.366	133.497	126.764	114.858	79.0107	116.891	100.467	97.5952	107.492	131.214	122.673	104.188	151.577	113.266	119.702	126.219	121.335	162.332	140.982	146.016	101.905	119.157	101.479	154.213	106.465	141.504	110.647	133.784	92.6891	96.5257	126.462	102.724	119.016	127.322	100.996	125.566	128.454	120.426	127.229	119.25
feature_745	3930402G23Rik	22.4076	17.2751	15.626	28.8193	16.547	19.6894	6.41843	15.2164	14.919	8.61272	9.5872	5.57563	11.4358	12.5586	7.32569	6.16391	9.66224	7.39232	16.7281	17.3647	20.7807	9.24624	4.20008	11.2387	11.8114	14.4755	21.0994	27.5103	7.45645	25.7378	18.9029	10.2241	7.96001	12.781	5.31958	16.7229	6.62065	0.861836	6.48524	5.76025	15.4448	28.3955	14.9993	26.435	17.7859	7.46831	7.48404	7.7561
feature_749	4632415L05Rik	1509.84	1799.2	1401.74	1492.3	1372.3	1807.49	1721.97	1472.41	1836.91	1543.83	1759.78	1672.69	1783.98	1356.33	1822	1899.51	1793.55	1703.93	1524.12	1691.69	1453.43	1340.7	1659.03	1697.91	1566.62	1655.37	1692.75	1276.06	1810.26	1593.84	1663.46	1535.32	1699.46	1640.54	1601.19	1727.74	1718.53	1522.86	1471.07	1819.28	1565.37	1455.5	1415.94	1372.42	1466.35	1459.12	1523	1519.23
feature_760	4833411C07Rik	41.6141	58.7354	42.282	27.0181	37.5066	41.3477	50.4305	48.3344	51.2842	32.2977	47.936	55.7563	64.4561	55.0645	51.2798	53.4205	66.4279	31.4174	61.3364	30.1598	20.7807	16.1809	50.401	28.529	38.6555	49.6302	44.1169	42.3236	67.1081	55.2887	34.8211	74.9766	55.7201	39.2561	45.7484	37.8467	42.5613	37.9208	27.0218	75.8433	29.981	47.6312	36.9984	23.1306	17.7859	45.7434	29.9362	42.6586
feature_779	4921507P07Rik	55.4855	62.1905	65.2614	81.9549	60.6724	66.9439	66.9351	66.236	53.1491	76.4379	62.8494	79.1739	61.3372	49.2683	33.4889	58.5571	78.5057	47.126	37.1736	53.9221	29.3375	85.5277	50.401	75.2129	64.4258	85.8189	65.2163	129.087	86.9919	55.2887	64.6678	65.6045	50.7451	61.1664	41.4928	51.049	47.2903	60.3286	47.5584	43.2019	29.0725	54.0431	50.9978	62.7831	60.2745	57.8794	47.7108	38.7805
feature_845	4930426D05Rik	130.177	228.032	245.419	106.271	75.0132	157.515	205.39	55.495	104.433	86.1272	145.939	192.917	111.239	65.691	182.096	94.5132	144.934	45.278	99.4394	103.274	244.479	101.709	113.402	167.716	127.778	191.283	99.7426	90.9957	111.018	92.4656	103.468	67.3085	99.5001	53.863	89.369	55.4498	87.96	68.9469	61.6097	140.166	55.4194	91.5984	62.9973	98.0298	83.989	74.6831	129.1	136.701
feature_863	4930432K21Rik	134.446	124.381	110.301	147.699	132.376	114.198	135.704	135.157	86.7169	118.425	119.307	133.815	93.5653	83.0798	77.443	102.732	143.726	124.745	91.0753	95.963	96.5691	76.2814	142.803	141.781	105.229	143.721	136.187	167.178	115.161	142.035	141.274	117.577	79.6001	107.726	171.291	115.3	108.768	109.453	94.0359	103.684	134.46	124.574	93.9959	112.349	141.299	122.294	159.036	112.463
feature_903	4930452G13Rik	20.2735	38.0053	55.1504	37.8253	40.816	35.4409	30.2583	32.2229	41.0274	12.9191	24.5006	23.4176	36.3865	27.0493	19.884	21.5737	30.1945	26.7972	44.6083	14.6229	41.5614	27.7387	43.0508	32.8516	30.0654	39.2906	36.4444	37.0331	31.4828	26.6911	21.8876	21.3002	20.895	18.2586	21.2783	24.6443	20.8077	27.5788	28.1027	18.2408	25.4384	33.8914	14.9993	31.9423	31.6194	33.6074	13.0971	28.1159
feature_907	4930453N24Rik	560.19	585.627	535.878	598	483.173	592.65	552.902	527.202	664.83	616.886	411.184	530.8	729.809	593.151	909.432	670.839	584.565	653.296	666.337	585.831	580.637	686.533	609.012	569.716	496.078	498.37	537.075	517.406	666.938	622.475	706.371	653.489	669.636	547.759	737.294	590.584	590.183	629.141	696.082	720.031	538.75	723.627	640.972	570.556	580.018	601.199	570.658	815.36
feature_912	4930455G09Rik	26.6757	55.2804	27.5752	8.10543	15.4439	29.5341	22.0061	19.6918	3.72976	16.1488	17.0439	33.4538	7.2773	9.66045	4.18611	16.4371	18.1167	3.69616	18.5868	13.709	26.8927	25.4271	28.3506	19.8839	16.1064	15.5094	20.1403	17.9875	21.5409	10.4858	23.8773	5.96404	15.92	21.9104	8.51133	10.5619	4.72903	11.2039	8.64698	4.80021	14.5362	26.5635	10.9995	8.81167	16.7978	18.6708	26.1941	13.5732
feature_1049	4930539J05Rik	38.413	19.0026	30.3327	25.2169	30.8878	39.3788	25.6737	33.118	44.7571	22.6084	31.9573	37.9143	34.3073	27.0493	16.7444	24.6556	14.4934	28.6452	30.6682	10.9672	14.6687	41.6081	16.8003	29.3935	26.8441	39.2906	37.4035	22.2199	28.9973	37.1769	16.9131	30.6722	18.905	29.2138	29.7897	41.3673	23.6452	14.6512	16.2131	32.6414	13.6277	26.5635	16.9993	16.5219	33.5956	23.3385	38.3557	31.9939
feature_1190	4931429L15Rik	18.1395	19.8664	13.7876	8.10543	9.92822	7.87575	5.50151	7.16064	6.52708	1.07659	3.19573	5.57563	4.15846	8.6944	10.4653	2.05464	7.24668	9.2404	6.50538	5.4836	9.77915	2.31156	14.7003	4.32258	5.36881	16.5434	7.67251	29.6265	3.31398	12.3923	3.97956	7.66806	5.97001	6.39052	9.57525	4.40077	2.83742	1.72367	6.48524	15.3607	9.08515	10.9918	14.9993	6.60875	6.91674	8.40184	15.9036	4.84756
feature_1242	4933406C10Rik	93.8985	106.242	115.816	92.7621	75.0132	108.292	108.196	77.872	106.298	87.2038	63.9147	139.391	61.3372	102.401	60.6986	48.2839	85.7524	96.1002	73.4178	111.5	103.903	80.9046	66.1513	81.2645	74.0896	124.076	91.111	148.133	87.8204	85.7928	119.387	68.1605	119.4	79.4251	132.99	112.66	98.3639	62.9141	56.2054	69.123	67.2301	62.2869	57.9975	83.7109	70.1555	73.7495	64.5498	84.3476
feature_1315	4933436E23Rik	6.40217	12.9563	5.51504	9.90663	12.1345	11.8136	11.003	2.68524	5.59464	1.07659	14.9134	4.4605	13.515	3.86418	2.09305	3.08195	12.0778	4.6202	8.36406	7.31147	6.11197	2.31156	7.35014	19.0194	7.51634	15.5094	12.4678	9.52281	5.79946	4.76627	12.9336	14.4841	4.97501	1.82586	3.19175	7.04124	6.62065	0	4.32349	3.84017	5.45109	18.3197	4.99978	8.81167	22.7264	12.136	3.74202	2.90854
feature_1320	4933439C10Rik	510.039	801.566	1064.4	438.594	483.173	666.486	609.751	649.829	625.667	488.772	805.325	752.71	435.598	508.14	620.591	414.009	483.112	574.753	392.181	386.594	805.558	522.412	522.91	491.91	711.905	896.446	702.993	711.036	637.941	501.411	589.969	750.618	638.791	592.493	808.577	552.737	582.617	500.727	525.304	646.108	471.519	499.211	617.973	612.411	681.793	458.367	718.468	707.744
feature_1330	5031434O11Rik	65.0887	52.6891	75.3723	45.0301	43.0223	48.239	57.7659	35.8032	44.7571	37.6806	59.6537	46.8353	21.8319	39.6078	46.0472	30.8195	30.1945	33.2654	44.6083	49.3524	72.1212	16.1809	71.4014	28.529	44.0243	86.8529	48.9122	70.892	40.5962	50.5224	25.8671	53.6764	43.7801	41.0819	53.1958	41.3673	28.3742	43.9537	35.6688	34.5615	31.798	46.7152	59.9974	44.0583	47.4291	35.4745	47.7108	61.0793
feature_1332	5033403F01Rik	12.8043	13.8201	5.51504	9.00603	7.72195	16.736	10.0861	8.95081	12.1217	11.8425	5.32622	17.842	7.2773	5.79627	3.13958	7.19122	4.83112	11.0885	5.57604	7.31147	15.8911	25.4271	7.35014	17.2903	7.51634	13.4415	12.4678	19.0456	13.2559	9.53254	11.9387	14.4841	12.935	6.39052	7.44742	5.28093	6.62065	1.72367	8.64698	2.88012	6.35961	14.6557	9.99957	7.71021	7.90485	11.2025	1.87101	6.78659
feature_1347	5430405H02Rik	142.982	183.98	179.239	137.792	159.955	160.468	166.879	156.639	134.271	142.11	156.591	180.65	108.12	117.857	150.7	122.251	153.388	170.023	130.108	139.832	150.354	97.0855	172.203	144.374	192.204	176.808	169.754	195.747	180.612	184.931	176.095	161.029	131.34	174.37	204.272	174.271	122.955	152.545	115.653	161.287	146.271	146.557	125.995	148.697	184.776	149.366	167.455	125.067
feature_1376	5730480H06Rik	28.8098	45.7791	45.9587	36.0241	20.9596	67.9284	40.3444	35.8032	39.1625	27.9913	35.1531	24.5328	24.9507	19.3209	29.3028	25.6829	26.5712	30.4933	38.1029	30.1598	41.5614	36.9849	32.5506	32.8516	24.6965	43.4264	32.6081	61.3692	22.3694	37.1769	28.8518	25.5602	49.7501	20.9974	27.6618	19.3634	8.51226	36.1971	21.6175	26.8812	23.6214	19.2357	17.9992	22.0292	30.6313	17.7372	24.3231	23.2683
feature_1386	5830417I10Rik	550.586	627.951	590.11	543.964	533.917	562.132	518.976	458.281	530.558	446.785	584.819	529.685	552.035	544.849	781.756	710.904	512.099	546.108	691.429	617.819	743.216	554.774	618.462	599.974	508.964	527.321	643.531	477.199	637.941	508.084	534.256	540.172	614.911	499.374	600.049	591.464	660.173	565.365	635.553	700.83	549.652	590.81	504.978	605.802	625.471	620.803	588.433	593.342
feature_1395	5930430L01Rik	212.339	127.836	147.987	202.636	164.367	216.583	163.212	167.38	142.663	191.633	164.048	206.298	133.071	103.367	136.049	155.125	239.14	115.505	210.96	114.242	145.465	55.4774	93.4518	126.219	168.581	180.943	150.573	181.991	193.868	135.362	175.101	136.321	161.19	169.805	144.693	176.031	107.822	116.348	125.381	135.366	158.99	121.826	85.9963	157.509	99.7987	166.17	141.261	175.482
feature_1398	6030408B16Rik	3.20108	1.72751	11.9493	0.900603	1.10314	8.86022	1.83384	2.68524	0.93244	1.07659	0	0	0	0.966045	1.04653	3.08195	1.20778	2.77212	0	2.7418	0	0	5.2501	1.72903	1.07376	7.23774	7.67251	2.11618	0	0	0.994889	2.55602	3.98001	0	1.06392	0	0.945807	0	2.16175	0.960042	0	0	3.99983	5.50729	1.97621	2.80061	0.935505	5.81708
feature_1412	6330408A02Rik	1123.58	1366.46	1104.85	1005.97	1096.52	1007.11	1221.34	1100.95	993.049	876.344	1151.53	1016.99	948.128	977.637	1125.02	1291.34	1123.24	1027.53	1269.48	1097.63	1195.5	1232.06	1387.08	1075.46	1331.47	1050.51	1054.97	1323.67	1171.49	1082.9	1063.54	1304.42	1101.47	1053.52	1365.01	1068.51	1246.57	1180.72	1228.95	1416.06	1257.39	1387.72	1186.95	1325.05	1316.16	1334.03	1255.45	1297.21
feature_1413	6330409D20Rik	86.4293	79.4656	86.4024	113.476	89.3539	77.7731	93.5257	91.2982	82.9872	132.421	115.046	97.016	66.5353	75.3515	65.9312	95.5406	90.5835	55.4424	86.4286	93.2212	62.3421	73.9699	68.2513	87.3161	108.45	95.1246	121.801	73.0082	95.2769	112.484	106.453	85.2006	68.6551	113.204	103.2	111.78	84.1768	119.795	67.0141	70.083	75.4068	100.758	76.9967	89.2181	85.9652	93.3538	70.1629	74.6525
feature_1416	6330415G19Rik	30.9438	62.1905	69.8572	52.235	81.632	48.239	56.849	58.1802	63.4059	66.7486	43.675	35.684	60.2976	29.9474	36.6285	22.601	54.3501	39.7337	48.3257	35.6434	56.2301	34.6734	51.451	51.0064	41.8767	74.4453	29.731	75.1244	44.7387	26.6911	70.6371	48.5644	33.83	43.8207	41.4928	62.491	47.2903	32.7498	18.3748	45.122	34.5236	65.9508	22.999	29.7394	32.6075	38.2751	55.1948	33.9329
feature_1458	8430429K09Rik	259.288	210.757	210.491	294.497	233.865	252.024	225.562	233.616	220.988	244.386	231.158	240.867	168.417	227.021	228.143	160.262	240.348	194.048	221.183	246.762	297.042	312.06	213.154	223.91	223.343	249.185	243.602	214.792	230.321	203.996	213.901	189.997	244.77	219.104	246.829	159.308	161.733	185.295	124.3	168.007	221.678	217.088	165.993	235.712	245.05	202.578	203.005	174.512
feature_1502	9330020H09Rik	52.2844	44.9153	51.4737	62.1416	57.363	85.6488	35.7598	43.859	57.8113	31.2211	37.2836	27.8781	28.0696	23.1851	38.7215	33.9015	27.7789	64.6828	43.679	18.2787	61.1197	34.6734	44.1009	29.3935	44.0243	44.4604	32.6081	43.3817	32.3113	54.3355	38.8007	47.7124	54.7251	37.4302	46.8123	43.1276	34.9948	22.4077	21.6175	25.9211	23.6214	32.9754	22.999	39.6525	55.3339	35.4745	42.0977	44.5976
feature_1503	9330102E08Rik	285.964	240.124	454.072	312.509	335.353	289.434	479.549	296.272	362.719	368.194	353.661	303.314	253.666	276.289	227.096	280.458	301.945	369.616	270.438	308.909	341.048	335.176	339.157	339.755	345.752	361.887	336.631	410.539	333.883	349.844	316.375	389.367	250.74	300.355	238.317	337.98	301.712	336.116	288.593	311.053	358.864	314.182	318.986	306.205	317.182	335.14	320.878	286.006
feature_1506	9330133O14Rik	333.98	415.467	363.993	441.295	491.998	405.601	364.017	424.268	340.341	445.708	367.509	402.56	253.666	284.017	291.981	274.294	344.217	364.996	392.181	313.479	343.493	455.377	457.809	338.89	340.383	342.242	451.719	281.452	367.023	347.938	397.956	350.175	363.176	365.173	381.946	315.976	239.289	336.978	287.512	300.493	316.163	321.51	283.988	337.046	374.492	338.874	364.847	306.366
feature_1538	9430083A17Rik	122.708	69.9643	86.4024	106.271	107.004	105.338	87.1073	76.9769	79.2574	105.506	66.0452	88.095	73.8126	76.3175	70.1173	79.1035	112.324	94.2521	82.7112	95.963	110.015	85.5277	116.552	76.0774	104.155	92.0227	99.7426	141.784	91.9629	78.1668	60.6883	91.1647	57.7101	83.0768	57.4515	69.5322	69.9897	73.2561	60.5289	58.5625	65.4131	102.59	60.9974	98.0298	76.0841	84.952	62.6788	80.4696
feature_1552	9530062K07Rik	58.6865	35.414	62.5038	21.6145	24.269	33.472	36.6768	27.7475	42.8922	39.8338	42.6098	54.6412	32.228	34.7776	25.1167	18.4917	26.5712	21.2529	26.0215	27.418	48.8958	48.5427	42.0008	17.2903	28.9916	19.6453	25.8947	23.278	33.1398	40.9899	44.77	44.3043	59.7001	11.8681	43.6206	25.5245	15.1329	29.3024	25.9409	8.64037	17.2618	29.3115	10.9995	4.40583	35.5718	16.8037	22.4521	29.0854
feature_1567	9830166K06Rik	9.60325	31.0952	24.8177	8.10543	9.92822	3.93788	15.5876	13.4262	12.1217	31.2211	5.32622	39.0294	18.7131	10.6265	5.23264	5.13659	3.62334	6.46828	5.57604	4.56967	8.55676	4.62312	4.20008	3.45806	9.66386	4.13585	17.2631	44.4398	0	28.5976	15.9182	13.6321	6.96501	13.694	27.6618	14.9626	8.51226	12.0657	14.0513	10.5605	9.08515	15.5717	1.99991	8.81167	7.90485	3.73415	18.7101	8.72562
feature_1569	9930014A18Rik	86.4293	93.2857	66.1805	66.6446	80.5289	75.8041	121.033	66.236	85.7845	75.3613	84.1543	78.0588	71.7334	63.759	64.8847	63.6937	74.8824	57.2905	70.6298	79.5122	67.2317	99.397	86.1017	72.6194	67.6471	82.717	99.7426	100.519	62.9656	79.12	99.4889	61.3445	64.6751	85.8156	81.9216	92.4163	50.1278	55.1575	43.2349	39.3617	69.9557	62.2869	47.9979	80.4065	78.0604	62.5471	71.0984	37.811
feature_1570	9930021J03Rik	3353.67	3058.56	3077.39	2855.81	3039.14	3377.71	3033.17	2804.29	3088.24	3424.63	3301.19	3238.33	3557.56	3391.78	3973.66	3554.52	3550.87	3190.71	3299.16	3376.98	3258.9	3582.92	2981.01	3740.76	3124.65	3025.38	3361.52	2970.06	3415.05	3078.06	3157.78	2966.69	3138.23	2996.24	2964.07	3723.06	3250.74	3163.8	3566.88	4091.7	3103.49	3092.36	3057.87	3022.4	2954.44	3225.37	3288.3	3307.01
feature_1584	A230050P20Rik	1365.8	2137.8	2557.14	1735.46	1997.78	1817.33	1930.11	2073.01	1800.54	1778.53	2077.23	2144.39	1789.18	1629.72	1733.05	1938.55	1713.84	1609.68	1503.67	1839.75	1904.49	1465.53	1961.44	1569.1	2293.56	2396.73	1972.79	2298.17	1930.39	2014.22	1717.18	2250.15	1907.42	2074.18	2238.48	1752.39	2079.83	1946.89	1835.32	1970.97	1665.31	2038.06	1755.92	2032.19	2087.87	1822.27	1799.91	1923.51
feature_1587	A230057D06Rik	188.864	295.405	546.909	316.112	183.12	523.738	387.857	256.888	264.813	254.075	226.897	521.879	140.348	232.817	315.005	254.775	253.634	309.553	183.08	254.073	485.29	201.106	247.805	255.032	272.736	479.759	324.163	407.365	323.113	338.405	303.441	305.018	407.951	209.061	394.713	280.769	209.023	285.268	287.512	374.416	158.99	218.92	164.993	267.654	285.563	294.065	322.749	279.22
feature_1600	A330033J07Rik	133.379	192.618	189.35	117.979	174.295	188.034	192.553	181.701	169.704	212.088	204.527	254.249	185.051	116.891	159.072	168.48	137.687	110.885	154.27	140.746	173.58	159.498	120.752	117.574	139.589	173.706	127.555	164.004	180.612	204.95	163.162	169.549	155.22	181.673	239.381	161.949	118.226	114.624	152.403	126.725	117.198	115.414	99.9957	112.349	126.478	106.423	135.648	102.768
feature_1626	A430105I19Rik	283.829	307.497	355.72	318.813	277.99	338.657	320.922	350.872	328.219	269.147	299.334	291.048	256.785	297.542	266.864	282.512	347.841	334.503	328.057	280.577	466.955	381.407	350.707	312.09	299.58	385.668	386.502	569.252	333.055	340.312	380.048	415.779	332.33	372.476	340.453	313.335	306.441	277.511	263.733	308.173	408.832	437.84	347.985	415.25	314.218	366.881	389.17	349.025
feature_1667	A730036I17Rik	8.53622	15.5476	16.5451	15.3102	17.6502	15.7515	20.1722	12.5311	17.7164	4.30636	5.32622	8.92101	16.6338	2.89813	9.41875	4.10927	42.2723	13.8606	21.3748	10.9672	18.3359	13.8694	23.1004	28.529	25.7703	43.4264	34.5263	42.3236	14.0844	39.0834	16.9131	21.3002	15.92	18.2586	12.767	37.8467	25.5368	21.5459	11.8896	22.081	27.2555	41.2193	11.9995	34.1452	32.6075	45.7434	24.3231	17.4512
feature_1675	A830009L08Rik	20.2735	5.18254	2.75752	8.10543	9.92822	3.93788	19.2553	11.636	20.5137	6.45954	9.5872	15.6118	6.23768	5.79627	0	6.16391	6.0389	8.31636	4.6467	0	12.2239	4.62312	8.40016	10.3742	1.07376	12.4076	9.59063	0	4.97097	4.76627	12.9336	5.11204	5.97001	7.30345	5.31958	5.28093	1.89161	2.58551	1.08087	0.960042	5.45109	0	1.99991	4.40583	5.92863	3.73415	12.1616	0.969513
feature_1697	A930013F10Rik	102.435	113.152	258.288	110.774	76.1163	184.096	167.796	83.2425	115.623	103.353	137.417	202.953	67.5749	106.265	143.374	115.06	73.6746	103.492	59.4777	116.983	198.028	104.02	117.602	96.8258	134.22	218.166	180.304	121.68	164.042	113.437	94.5145	174.661	142.285	93.119	126.606	125.862	88.9058	130.137	136.19	147.846	74.4983	69.6148	80.9965	129.972	99.7987	112.958	154.358	119.25
feature_1707	AA388235	281.695	146.839	193.946	164.81	161.058	146.686	124.701	142.318	133.339	197.016	169.374	110.397	59.258	105.299	165.351	98.6225	99.0379	235.63	182.151	134.348	165.023	263.518	323.406	188.465	90.1961	120.974	150.573	146.016	114.332	217.342	86.5554	132.913	136.315	121.42	98.9443	70.4124	121.063	166.334	83.2272	199.689	138.094	263.803	224.99	161.914	246.038	182.04	145.939	135.732
feature_1708	AA413626	5.33514	0.863756	7.35339	3.60241	1.10314	17.7204	9.16919	8.05573	1.86488	6.45954	3.19573	5.57563	2.07923	1.93209	2.09305	4.10927	0	6.46828	0.92934	2.7418	9.77915	9.24624	1.05002	3.45806	7.51634	13.4415	6.71344	0	5.79946	4.76627	5.96934	9.37207	8.95501	4.56466	2.12783	6.16108	0	2.58551	0	1.92008	1.81703	1.83197	0	0	3.95242	1.86708	0.935505	1.93903
feature_1720	AA986860	133.379	175.343	144.31	117.979	140.098	161.453	151.292	130.682	111.893	89.357	134.221	149.427	113.318	97.5705	126.63	117.114	108.7	91.48	131.966	105.102	161.356	117.889	128.102	121.897	140.663	143.721	137.146	122.738	140.844	136.315	167.141	129.505	132.335	115.029	131.926	133.784	111.605	90.4928	124.3	172.807	120.833	131.902	112.995	132.175	123.513	126.028	142.197	122.159
feature_1731	AF529169	229.411	165.841	252.773	199.033	194.152	225.443	207.224	214.819	226.583	302.522	290.812	225.255	295.25	316.863	289.888	327.714	237.933	328.958	236.982	268.696	161.356	228.844	192.154	213.535	185.761	181.977	271.415	210.56	169.013	237.36	246.733	314.39	187.06	262.011	165.971	311.575	301.712	286.992	440.996	255.371	325.248	196.021	275.988	351.365	316.194	303.4	214.231	267.586
feature_1732	AI115009	8.53622	14.6839	13.7876	5.40362	13.2376	9.84469	41.2613	11.636	9.3244	46.2934	21.3049	11.1513	13.515	7.72836	3.13958	15.4098	9.66224	7.39232	9.2934	15.5369	17.1135	6.93468	14.7003	14.6968	18.254	16.5434	19.1813	27.5103	14.0844	7.62603	11.9387	11.9281	11.94	10.9552	10.6392	13.2023	2.83742	10.342	11.8896	4.80021	5.45109	11.9078	6.9997	8.81167	12.8454	9.33538	9.35505	4.84756
feature_1745	AI464131	1628.28	1423.47	1623.26	1240.13	1485.92	1571.21	1499.16	1712.29	1618.72	1301.6	2165.64	1508.77	1396.2	1765.93	1748.75	1850.2	1635.33	1874.88	1882.84	1680.72	1562.22	1712.87	1613.88	1577.74	1314.29	1207.67	1542.17	2008.25	1642.08	1388.89	1607.74	1641.82	1487.53	1698.97	1683.12	1614.2	1951.2	1637.49	2046.09	1658.95	2156.82	1710.14	1890.92	1952.89	1631.36	1755.99	1598.78	1679.2
feature_1758	AI839979	19.2065	16.4114	14.7068	30.6205	9.92822	4.92235	9.16919	11.636	9.3244	15.0723	9.5872	12.2664	11.4358	25.1172	25.1167	13.3551	20.5323	12.0125	15.7988	19.1926	29.3375	30.0503	9.45018	19.8839	16.1064	8.2717	12.4678	3.17427	14.0844	13.3455	4.97445	18.7441	22.885	13.694	8.51133	11.442	11.3497	23.2696	14.0513	15.3607	19.0788	19.2357	24.9989	25.3335	16.7978	14.9366	21.5166	18.4207
feature_1814	Aamdc	676.496	561.442	599.302	703.371	674.016	573.946	554.736	651.619	612.613	578.129	520.905	572.06	612.333	656.91	574.544	554.752	742.785	719.827	594.777	615.991	575.748	739.699	625.812	658.761	645.331	532.491	479.532	586.182	575.804	574.812	559.128	547.84	629.836	604.361	598.985	568.58	653.552	650.687	612.855	517.462	617.79	612.793	712.969	595.889	638.316	608.667	587.497	619.519
feature_1822	Aasdh	412.94	490.614	606.655	370.148	328.734	502.079	412.613	342.816	423.328	308.981	369.64	485.08	378.419	474.328	459.426	412.982	419.1	380.705	433.072	365.573	666.205	420.704	489.31	459.923	533.66	636.921	528.444	542.8	590.717	457.562	463.618	511.204	473.621	402.603	395.777	409.272	508.844	399.892	411.813	552.024	402.472	378.301	342.985	457.105	441.683	470.503	625.853	540.019
feature_1838	Abca5	4259.58	3960.32	3415.65	3394.37	3409.79	4237.16	3594.32	3505.14	3845.38	4007.07	3572.83	3905.17	3906.87	3600.45	3912.97	3469.25	3688.56	3405.09	3539.86	3437.3	3173.33	3192.26	3123.81	3779.66	3462.88	3671.6	3904.35	2924.56	3705.86	3671.93	3741.78	2901.08	4069.56	3269.21	3473.69	4148.17	3225.2	3212.06	3186.41	4050.42	3180.71	3080.45	2545.89	2629.18	3065.1	3729.49	3578.31	3362.27
feature_1862	Abcc8	345.717	410.284	579.08	404.371	350.797	270.729	374.103	414.422	325.422	470.47	365.379	403.676	344.112	392.214	338.028	397.572	504.852	377.008	399.616	482.557	383.832	423.015	481.959	432.258	415.546	383.6	398.97	370.331	289.145	367.003	358.16	397.035	213.925	340.524	325.559	396.95	343.328	398.168	341.556	306.253	397.021	358.15	331.986	470.323	373.504	384.618	306.846	361.628
feature_1869	Abcf1	3752.74	3817.8	3676.7	4021.19	3916.13	3743.94	3906.99	3388.78	4004.83	3771.29	3814.64	3587.36	4064.89	3929.87	4328.44	4325.01	3808.13	3683.22	3752.67	4063.35	3505.83	3680	3823.12	3707.05	4342.3	4038.66	3981.07	3561.53	4224.49	3690.04	3815.4	4214.88	3919.31	3657.2	4125.87	3958.94	4095.34	4162.67	4212.16	4247.22	3939.32	4410.46	4279.81	4518.18	3917.84	4181.32	3831.83	3806.31
feature_1876	Abcg5	2.13406	6.04629	2.75752	11.7078	2.20627	0	0	0	0	0	0	3.34538	0	0	0	0	6.0389	0	0	2.7418	0	0	0	0	1.07376	2.06793	1.91813	10.5809	0	2.85976	0	0.852006	0	0	0	0	0	1.72367	0	0	1.81703	0	0	0	1.97621	0	0	0.969513
feature_1884	Abhd13	1712.58	1644.59	1330.04	1493.2	1474.89	1839.97	1616.53	1638.89	1485.38	1576.13	1600	1616.93	1559.42	1604.6	1499.67	1516.32	1490.4	1498.79	1594.75	1402.89	1321.41	1534.88	1475.28	1449.79	1571.99	1489.94	1665.89	1441.12	1622.19	1513.77	1531.13	1360.65	1618.87	1406.83	1437.35	1615.08	1331.7	1434.96	1406.22	1605.19	1409.11	1362.98	1441.94	1263.37	1362.6	1592.62	1479.97	1519.23
feature_1894	Abhd3	2876.71	2028.1	2375.15	2527.09	2525.08	2656.1	2434.42	2916.17	2805.71	2449.24	2751.53	2388.6	2462.85	2923.25	2619.46	2491.25	2943.36	3050.26	2981.32	2624.82	2549.91	2621.31	2213.44	2786.34	1918.81	2012.09	2453.28	2296.06	2132.55	2138.15	2826.48	2439.29	2370.09	2610.98	2350.19	2412.5	2583.94	2554.48	2414.67	2392.42	3089.86	2851.46	2910.87	2626.98	2517.69	2475.74	2467.86	2595.39
feature_1899	Abi1	3838.1	3158.76	3170.23	3931.13	3802.51	3811.86	3812.55	3923.14	4083.15	4525.98	3677.22	3730.1	3863.21	4211.96	3712.03	3635.68	3816.58	3808.89	3644.87	3593.59	3431.26	3885.73	3417.82	3860.06	3262.09	3423.45	3582.1	3236.7	3584.9	3464.12	3812.42	3359.46	3562.11	3712.89	3465.18	3702.81	3363.29	3643.84	3890.06	3445.59	3516.86	3234.34	3525.85	3264.72	3493.94	3455.02	3374.37	3494.12
feature_1909	Abr	17407.5	16781.9	18113.2	17287.1	17596.1	16733	17289.4	18077.9	16129.3	16816.3	18196.5	15983.1	17021.6	17142.5	18040	19823.1	18521.3	18513.1	17915.8	19379	16381.3	16116.2	19449.5	17341.3	19228.9	17622.9	18235.6	18175.9	17928.6	18169	17712	19430.9	16835.4	18744.3	17951.5	19653.9	18956.8	20346.2	20719.3	18822.6	20422.5	17873.6	18645.2	20554.3	18854	20078.5	17896.2	18840.5
feature_1914	Abtb2	442.817	533.801	613.089	409.774	526.195	411.508	484.133	519.147	411.206	343.432	572.036	444.935	409.608	440.516	553.613	641.046	454.125	549.804	591.989	542.876	550.077	460	590.111	510.929	496.078	434.264	383.625	568.194	429.989	442.31	472.572	581.92	488.546	544.107	481.954	450.639	555.189	442.984	642.038	492.501	613.248	517.531	627.973	703.832	501.958	491.975	543.528	518.689
feature_1938	Acbd4	852.555	1166.07	1148.97	996.067	863.755	866.333	956.346	972.058	844.791	826.821	980.025	1081.67	794.265	704.247	754.546	927.668	812.836	731.84	855.922	807.917	944.911	846.031	952.368	752.129	1089.87	971.925	783.555	1235.85	951.112	1164.88	992.9	977.251	988.036	1013.35	1010.72	851.99	984.585	846.323	845.243	891.879	1103.85	980.103	867.962	978.095	909.057	837.384	986.958	873.531
feature_1942	Accs	275.293	337.729	439.365	230.554	236.071	299.279	249.402	331.18	219.123	194.863	328.095	325.617	187.131	225.088	354.773	261.966	398.567	335.427	321.552	318.049	427.838	235.779	277.205	312.09	381.186	370.159	379.789	297.323	267.604	363.19	304.436	274.346	299.495	327.743	373.435	309.815	294.146	251.656	218.336	313.934	264.378	314.182	180.992	279.77	351.766	370.615	451.849	286.976
feature_1943	Accsl	12.8043	12.0926	28.4944	7.20482	8.82508	10.8292	7.33535	6.26556	0	12.9191	8.52196	6.69076	9.35653	0.966045	6.27916	11.3005	9.66224	3.69616	3.71736	13.709	13.4463	2.31156	2.10004	4.32258	12.8852	9.30566	13.4269	16.9294	9.11344	6.67277	8.954	5.96404	2.985	7.30345	10.6392	10.5619	0.945807	5.17102	4.32349	4.80021	8.17664	0.915984	4.99978	3.30438	5.92863	5.60123	6.54853	7.7561
feature_1952	Acin1	6347.75	7996.66	8161.35	6689.68	6540.49	7450.46	7742.46	6209.17	7192.84	6731.92	6967.76	7528.22	8223.35	7638.52	9419.79	8751.72	7354.17	6801.86	7036.03	7378.18	8292.72	7477.89	6944.83	7160.79	7882.49	7985.29	7100.9	7679.62	7939.46	7512.59	7517.38	7967.11	8092.35	6836.95	8369.83	8036.7	8665.48	8439.96	8429.73	9761.7	6730.28	8024.02	7496.67	8903.09	7326.8	7607.4	7580.4	7951.94
feature_1986	Acr	27.7427	120.926	130.523	41.4277	69.4975	87.6178	79.7719	52.8098	39.1625	50.5997	68.1757	118.203	23.9111	27.0493	62.7916	55.4752	28.9867	36.0376	29.7389	52.0942	80.678	18.4925	35.7007	41.4968	39.7292	78.5812	79.6022	81.4729	38.1108	54.3355	74.6167	73.2725	60.6951	54.7759	94.6886	54.5696	22.6994	38.7826	56.2054	46.082	26.3469	46.7152	35.9984	68.2904	91.8938	56.0123	64.5498	45.5671
feature_2008	Acta2	367.058	280.721	199.461	176.518	189.739	248.086	172.381	237.196	358.989	170.101	355.792	219.68	151.784	239.579	124.537	184.917	167.881	179.264	131.966	104.188	206.585	312.06	80.8516	160.8	150.327	335.004	195.649	187.282	246.891	366.049	376.068	254.75	363.176	360.608	384.074	197.155	224.156	166.334	109.168	197.769	202.599	260.139	155.993	149.798	149.204	186.708	221.715	324.787
feature_2017	Actl6b	1701.91	2070.42	2064.47	1918.28	1788.18	1750.39	1970.46	1830.44	1551.58	1618.11	1890.81	2030.64	1576.05	1427.81	1680.72	1738.22	1722.29	1590.27	1647.72	1639.6	1979.06	1671.26	1902.64	1609.73	2029.41	2083.43	1891.27	1965.93	1937.85	1876	1831.59	1855.67	1755.18	1825.86	2099.11	1695.18	1813.11	1815.03	1700.21	1719.43	1782.51	2026.16	1854.92	1853.75	2018.7	1832.54	1935.56	1933.21
feature_2030	Actr3b	1164.13	874.121	1160	1367.12	1247.65	997.267	1383.63	1176.14	1481.65	1719.31	1082.29	1216.6	1295.36	1485.78	1449.44	1356.06	1599.1	1342.63	1442.34	1582.02	1674.68	1784.52	1566.63	1550.08	1439.92	1207.67	1343.65	1381.87	1323.93	1254.48	1189.89	1341.91	1071.62	1460.69	1325.64	1254.22	1473.57	1548.72	1484.04	1403.58	1536.3	1829.22	1379.94	1265.58	1420.9	1592.62	1407.94	1263.28
feature_2074	Adam33	30.9438	25.0489	49.6354	12.6084	28.6815	27.5651	37.5937	26.8524	17.7164	3.22977	22.3701	26.763	17.6734	24.1511	17.791	31.8469	26.5712	21.2529	23.2335	20.1065	19.5583	9.24624	27.3005	27.6645	54.7619	42.3925	48.9122	38.0912	37.2823	20.9716	24.8722	23.0042	8.95501	20.9974	36.1732	27.2848	33.1032	14.6512	15.1322	20.1609	29.981	20.1516	14.9993	19.8263	31.6194	19.6043	43.9687	9.69513
feature_2086	Adamts10	357.454	436.197	765.672	340.428	317.703	441.042	413.53	403.681	286.259	412.334	395.206	378.028	257.824	326.523	338.028	315.387	357.503	321.566	319.693	330.844	573.303	314.372	375.907	288.748	412.325	554.204	415.274	497.302	365.366	428.964	323.339	465.195	367.156	356.956	377.69	409.272	429.396	368.866	367.497	345.615	365.223	346.242	392.983	494.555	418.957	398.621	439.687	447.915
feature_2087	Adamts12	23.4746	20.7302	23.8985	15.3102	14.3408	10.8292	3.66768	12.5311	4.6622	11.8425	3.19573	15.6118	7.2773	9.66045	2.09305	17.4644	10.87	12.0125	9.2934	10.9672	8.55676	11.5578	19.9504	14.6968	17.1802	9.30566	25.8947	16.9294	10.7704	13.3455	9.94889	5.96404	6.96501	7.30345	5.31958	20.2436	12.2955	12.0657	10.8087	12.4805	19.0788	12.8238	12.9994	27.5365	14.8216	25.2055	14.9681	12.6037
feature_2102	Adamts8	126.976	201.255	82.7257	102.669	145.614	175.236	183.384	111.885	148.258	97.9697	162.982	131.585	142.427	86.944	105.699	126.36	86.9602	72.0751	71.5592	72.2007	108.793	97.0855	79.8015	73.4839	96.6386	120.974	101.661	83.5891	62.9656	107.718	104.463	115.021	142.285	87.6415	69.1546	46.6482	98.3639	93.9402	60.5289	62.4027	74.4983	75.1107	61.9973	66.0875	104.739	55.0788	83.2599	67.8659
feature_2112	Adarb1	4964.88	4820.62	5459.89	5184.77	5206.8	4952.86	5197.1	5288.14	5172.24	7395.1	4730.75	4598.78	5781.29	5449.46	5378.1	6366.29	6281.66	5538.7	5461.73	6743	4989.81	4595.38	6118.47	5375.56	6035.62	5391.08	5284.44	5577.19	5188.03	5292.46	5022.2	5422.17	4507.36	5201.89	4816.35	5661.16	6272.59	5728.63	6019.38	6157.71	5948.96	5473	4789.79	6059.12	5576.87	5578.82	4386.58	5478.72
feature_2134	Add1	10348	10328.8	10935.4	10311	10334.2	9854.54	10918.7	10551.2	10098.3	10503.2	11009.3	10099.7	10313	10787.8	10793.9	11853.2	10780.6	11348.1	10970.9	11253.3	9819.49	10367.3	11279.3	10643.1	10875.1	10280.7	10683	11252.8	10437.4	10909	10067.3	12050.8	9979.86	10948.8	10578.5	10803	11256	11289.2	11472.4	10881.1	11500.9	10747.2	12210.5	12376	11036.2	12125.7	10747.1	10985.5
feature_2139	Adgra2	1200.41	1076.24	943.073	1209.51	942.077	1071.1	940.759	995.33	1083.5	824.668	1147.27	964.584	995.95	1137.03	1232.81	1290.31	1130.48	1204.02	1156.1	1125.97	1096.49	1326.83	1038.47	1156.72	990.009	985.367	1001.26	1182.94	922.943	1111.49	1061.55	1042	1170.12	1142.99	1070.3	1182.93	1139.7	1089.36	1353.25	1244.21	1226.5	1161.47	1419.94	1330.56	927.831	1264.01	1205.87	1153.72
feature_2149	Adgrf2	18.1395	12.9563	39.5245	21.6145	16.547	22.6428	7.33535	12.5311	5.59464	7.53613	24.5006	23.4176	15.5942	5.79627	20.9305	11.3005	9.66224	8.31636	15.7988	16.4508	28.1151	9.24624	9.45018	6.91613	25.7703	29.9849	23.9766	10.5809	10.7704	20.0183	17.908	14.4841	17.91	6.39052	9.57525	22.0039	10.4039	7.75653	10.8087	17.2807	13.6277	5.4959	9.99957	13.2175	12.8454	14.9366	25.2586	7.7561
feature_2151	Adgrf4	60.8206	69.1005	79.049	18.9127	51.8474	63.006	62.3505	60.8655	52.2166	68.9018	35.1531	70.2529	22.8715	15.4567	34.5354	18.4917	20.5323	14.7846	23.2335	24.6762	25.6703	20.804	39.9008	31.1226	28.9916	56.868	38.3625	25.3942	24.0263	40.0366	44.77	23.0042	35.8201	24.6492	11.7031	26.4046	8.51226	15.5131	22.6983	30.7213	15.4448	21.9836	22.999	26.435	23.7145	19.6043	29.9362	20.3598
feature_2175	Adipor2	3657.77	4703.15	3389.91	2787.37	3387.73	3580.51	3763.95	3163.21	4084.09	2819.59	3571.77	4188.41	4552.47	3680.63	5481.71	4438.01	3883.01	3430.96	4433.88	3370.59	3620.73	3629.15	3920.78	4106.45	4285.39	3970.42	3829.54	3554.12	4947.77	4745.3	4390.45	3714.75	5643.65	4346.47	4934.45	4619.05	5183.02	4198.87	4244.59	5719.93	3863.01	4299.63	4046.82	3742.76	3548.29	4038.49	4635.43	4484.97
feature_2191	Adra1a	333.98	245.307	246.339	188.226	277.99	240.21	299.832	281.055	274.137	251.922	305.725	217.45	342.033	302.372	256.399	353.397	410.645	324.338	330.845	274.18	303.154	316.684	300.306	308.632	290.99	317.427	340.467	292.033	213.752	276.444	258.671	253.046	253.725	253.795	211.719	304.534	279.013	238.729	291.836	336.015	317.072	267.467	227.99	411.946	203.55	278.194	297.491	299.579
feature_2192	Adra1b	356.387	367.96	509.222	332.322	428.016	324.875	471.296	585.383	290.921	358.504	481.491	519.649	357.627	330.387	379.889	330.796	323.685	316.022	341.997	369.229	234.7	355.98	383.257	363.961	379.038	308.121	387.462	444.398	383.593	333.639	440.736	426.855	319.395	503.025	417.055	351.182	476.687	399.892	370.739	280.332	397.021	259.223	315.986	377.8	331.015	294.998	348.943	361.628
feature_2208	Aebp2	2636.63	2664.69	2630.68	2480.26	2447.86	2767.34	2722.33	2730.89	2940.92	2653.79	2855.92	2597.13	3090.77	3271.99	3378.19	2979.22	2623.3	2621.5	2797.31	2657.72	2622.04	2736.89	2317.39	2743.11	2579.18	2397.76	2541.52	2401.86	2741.49	2531.84	2643.42	2435.03	2805.9	2613.72	2501.27	2880.75	2727.71	2619.98	2850.26	3086.53	2393.03	2697.57	2611.89	2488.19	2445.56	2676.45	2618.48	2544
feature_2221	Afmid	267.824	289.358	332.741	271.982	328.734	275.651	219.144	235.406	199.542	264.841	243.941	264.285	234.953	227.987	218.724	247.584	239.14	231.01	209.101	298.856	287.263	233.467	269.855	271.458	261.998	313.291	305.941	211.618	303.229	326.966	251.707	295.646	281.585	245.579	237.253	223.559	209.969	228.387	223.741	189.128	237.123	252.812	202.991	253.335	245.05	238.052	217.973	222.018
feature_2225	Agap1	9032.39	9329.43	8716.53	7982.04	8580.19	8487.11	8703.39	8761.94	8205.47	8189.62	9328.35	7998.8	8584.09	9024.79	10195.3	10554.7	9967.81	9275.51	10281.3	9232.55	8988.26	8575.88	9841.84	8926.99	9678.9	8754.56	9561.86	10037	9299.85	9441.02	9133.08	9953.14	8958.99	9115.62	9330.55	9997.68	9838.28	9377.64	10820.6	11755.7	10702.3	9463.03	9095.61	10526.6	9329.69	10025.3	9685.28	9731.97
feature_2249	Agpat5	3187.21	2485.03	2729.03	2782.86	2990.6	3106.98	2702.16	2987.78	3025.77	2478.31	2932.62	2675.19	2977.45	3590.79	3434.7	3051.13	2979.59	3576.04	3249.9	2962.97	3044.98	3363.32	2903.31	3483.14	2536.23	2397.76	3175.46	2636.76	3247.7	2742.51	2879.21	2781.8	2952.17	2765.27	2883.21	2762.81	3112.65	2844.06	3049.14	2843.64	3007.19	3304.87	3343.86	2819.73	2811.16	2718.46	3043.2	2898.84
feature_2250	Agpat6	3735.67	3497.35	3608.68	3972.56	3984.52	3665.18	3458.62	3855.11	3547.93	3897.26	3943.54	3699.99	4122.07	3972.38	4101.34	4241.8	3890.26	3943.8	3802.86	4326.56	3566.95	3536.68	3972.23	3783.99	4441.08	4121.38	4145.07	3871.55	4289.95	3971.25	3987.52	4138.19	4046.67	4086.28	4165.23	4133.21	4339.36	4657.36	4206.76	4075.38	4298.19	4111.85	4230.82	4099.63	4270.59	4128.11	3636.31	3865.45
feature_2265	Ahctf1	2710.25	2587.81	2507.51	2454.14	2315.48	2997.71	2861.7	2258.29	2598.71	2482.62	2697.2	2762.17	3140.67	3113.56	3291.33	2967.92	2478.36	2354.45	2714.6	2565.41	2520.58	2549.65	2297.44	2703.34	2530.86	2534.24	2785.12	2357.42	3027.32	2873.11	2785.69	2583.28	2750.18	2546.17	2664.05	3236.33	2638.8	2727.71	3088.05	3394.71	2489.33	2507.05	2284.9	2558.69	2322.05	2809.02	2701.74	2678.76
feature_2274	Ahsa1	5782.23	4817.17	5197.01	6484.34	5054.57	4911.52	4961.45	4521.05	5291.6	5122.41	4449.53	4457.16	6234.56	6626.1	5768.46	5760.17	5948.32	6252.06	5421.77	6403.93	5806.37	6950.86	6124.77	6030	5634.03	5000.24	4845.19	4600.58	5574.94	5312.48	4975.44	5581.49	5551.11	5127.02	5183.4	4973.76	6473.1	6341.39	5965.34	6091.46	6101.59	7043.92	7579.67	6062.43	5372.33	5829.95	5111.6	5701.71
feature_2275	Ahsa2	1643.22	1372.51	1753.78	1658.01	1105.34	1513.13	1534.92	1126.91	1720.35	1449.09	1188.81	1470.85	2240.37	2318.51	2491.78	1975.53	1645	1881.35	1548.28	1742.87	1957.05	2108.14	1480.53	1753.24	1471.05	2002.79	1488.47	1346.95	1916.31	1706.32	1437.62	1613.7	1974.08	1439.69	1673.54	1675.82	2103.47	2156.31	2126.08	2206.18	1411.83	1844.79	2348.9	1538.74	1520.69	1419.91	1708.23	1851.77
feature_2281	Aifm1	1252.69	1122.88	1053.37	1036.59	1047.98	1215.82	1187.41	1095.58	1173.01	1145.49	1100.4	1222.18	1335.9	1225.91	1378.28	1186.55	1315.27	1174.45	1229.52	1258.49	1322.63	1259.8	1199.12	1322.71	1231.61	1121.85	1101	1058.09	1407.61	1118.17	1128.2	1163.84	1303.45	1025.22	1208.61	1086.11	1309	1147.97	1077.63	1303.74	1301.9	1394.13	1271.94	1170.85	1112.61	1127.71	1097.35	1125.6
feature_2283	Aifm3	1801.14	2003.05	3240.09	1929.99	1799.21	1729.71	1782.49	1825.07	1806.14	1426.48	1919.57	1943.66	1292.24	1485.78	1587.58	1615.97	1468.66	1783.4	1424.68	1539.98	2277.32	1380	1812.34	1401.38	1880.16	2561.13	2082.13	2642.05	1917.97	1895.07	1621.67	2352.39	1538.27	1957.33	2085.28	1670.53	1812.17	1865.88	1699.13	2038.17	1921.51	1951.05	2013.91	2200.71	2009.81	1945.49	2353.73	2209.52
feature_2298	Ak3	2950.33	2022.92	2239.11	2703.61	2260.32	2533.04	2479.35	2667.34	3182.42	2513.84	2550.2	2338.42	2731.07	3274.89	2780.62	2458.37	2643.83	3204.57	3029.65	2759.16	2773.61	3051.26	2547.35	2962.7	1881.23	1913.87	2428.35	2539.42	2500.4	2279.23	2358.88	2593.51	2702.42	2628.33	2395.94	2369.38	2737.16	2360.57	2844.86	2425.07	2882.72	2897.26	3024.87	2553.18	2357.62	2376.79	2455.7	2502.31
feature_2301	Ak6	378.795	337.729	329.984	425.985	353.003	410.524	445.623	288.216	391.625	349.892	252.463	335.653	503.173	515.868	430.123	374.971	411.853	414.894	390.323	452.397	499.959	485.427	403.208	364.826	351.12	324.664	393.216	403.132	376.137	358.423	381.043	403.851	331.335	372.476	444.717	339.74	456.825	477.457	444.239	396.497	403.381	483.639	506.978	383.308	423.897	373.415	322.749	393.622
feature_2303	Ak8	112.038	135.61	143.391	126.985	170.986	84.6644	125.618	144.108	147.326	142.11	113.981	148.312	151.784	157.465	65.9312	122.251	86.9602	125.669	138.472	111.5	107.571	152.563	69.3013	99.4194	113.819	151.993	127.555	161.888	102.733	181.118	203.952	112.465	144.275	184.412	219.167	138.184	121.063	146.512	131.866	106.565	123.558	120.91	88.9961	125.566	139.323	102.689	143.132	107.616
feature_2315	Akap6	13654.8	11310.9	10895	11789.8	10948.6	12026.3	10965.4	10910.1	10879.7	12935.2	11463.1	9997.1	12590.8	12741.2	13212.4	13720.9	13860.5	12841.4	13522.8	13632.2	10251	11962.3	12343	12555.4	12305.3	10936.2	12834.2	11252.8	11527.7	12059.6	11608.4	11905.9	10519.2	10757.1	10340.2	13858	11532.2	13303.3	13453.6	14947.8	12851.9	11251.9	10359.6	13317.7	11214	14288.7	11863.1	12084
feature_2318	Akap8l	2501.11	3575.09	5186.9	2713.52	2285.7	2972.11	3068.93	2475.79	2680.76	2559.05	2833.55	3617.47	2434.78	2634.4	3406.45	2737.8	2857.61	2664.93	2614.23	2661.37	4135.36	2790.05	2912.76	2663.57	3758.17	5087.1	3336.58	4143.48	3322.26	3100.93	2830.46	3188.21	3101.42	2567.16	3355.59	3041.82	3134.4	3019.01	2670.84	3818.09	2340.34	3071.29	2694.88	3439.86	3045.34	2727.8	3624.15	3489.28
feature_2349	Alas1	1214.28	1425.2	1342.91	1464.38	1355.75	1296.55	1479.91	1381.11	1434.09	1387.72	1468.97	1561.18	1393.08	1223.98	1359.44	1363.25	1335.8	1257.62	1255.54	1292.3	1321.41	1199.7	1449.03	1321.85	1453.87	1490.97	1405.03	1437.94	1467.26	1427.02	1429.66	1504.64	1340.27	1500.86	1486.29	1358.08	1362.91	1302.23	1394.33	1334.46	1392.75	1353.82	1464.94	1370.21	1466.35	1389.1	1350.87	1305.93
feature_2359	Aldh1b1	349.985	430.151	478.89	378.253	440.151	362.285	353.014	449.33	353.395	390.802	386.684	316.696	297.33	324.591	327.563	377.026	350.256	340.047	312.258	373.799	328.824	330.553	470.409	349.265	532.586	389.804	429.66	452.863	432.474	394.647	425.813	337.394	275.615	352.392	363.86	403.991	392.51	517.964	297.24	282.252	389.753	423.185	416.982	424.062	473.303	351.01	350.814	376.171
feature_2377	Aldob	9.60325	34.5503	94.6749	20.7139	20.9596	61.0371	55.0151	40.2786	20.5137	43.0636	35.1531	57.9866	19.7527	31.8795	30.3493	22.601	14.4934	28.6452	32.5269	21.0205	29.3375	18.4925	36.7507	16.4258	32.2129	59.9698	58.5029	46.556	42.2532	22.8781	24.8722	50.2684	47.7601	27.388	41.4928	32.5657	33.1032	41.3681	34.5879	27.8412	18.1703	21.0676	21.999	27.5365	36.5599	34.5409	31.8072	36.8415
feature_2379	Alg1	730.914	828.342	1073.6	863.678	880.302	827.939	866.488	972.058	797.236	677.175	1050.33	860.877	718.373	645.318	723.15	759.188	760.901	709.663	803.879	872.806	795.778	788.242	964.969	816.968	1025.44	876.8	883.297	1116.28	852.521	849.349	839.687	842.634	929.331	919.322	1006.47	859.911	880.546	926.474	674.465	805.475	885.802	847.285	842.963	927.428	961.427	803.776	852.245	826.994
feature_2394	Alkbh3	195.266	218.53	215.087	196.331	262.546	282.543	267.74	235.406	268.543	235.773	190.679	216.334	182.972	184.515	162.212	152.043	234.309	210.681	186.797	172.733	237.144	177.99	204.754	185.006	187.908	362.921	246.479	209.502	229.493	227.828	217.881	235.154	256.71	235.536	265.979	201.555	194.836	172.367	145.918	177.608	210.776	209.76	160.993	200.465	287.539	224.983	249.78	194.872
feature_2410	Aloxe3	160.054	331.682	276.671	186.425	337.559	316.015	285.162	306.118	192.083	193.786	196.005	323.387	222.477	160.363	217.678	198.272	223.439	156.163	212.819	241.278	200.473	182.613	234.155	153.019	302.801	349.479	254.152	228.547	323.941	291.696	264.641	253.046	241.785	251.969	246.829	261.406	238.343	178.4	201.042	206.409	196.239	203.348	173.992	258.843	317.182	192.309	163.713	190.994
feature_2412	Alpk1	84.2952	88.1032	197.622	85.5573	108.107	165.391	149.458	84.1376	168.772	184.097	166.178	118.203	155.942	76.3175	119.304	108.896	123.194	100.72	111.521	88.6515	136.908	90.1508	99.7519	100.284	53.6881	125.109	137.146	118.506	126.76	129.642	98.4941	93.7207	174.125	118.681	137.245	129.383	112.551	87.0455	118.896	134.406	62.6876	91.5984	37.9984	105.74	57.3101	105.49	132.842	50.4147
feature_2426	Amacr	320.108	370.551	324.468	416.079	306.672	312.077	298.916	277.475	312.367	325.13	394.141	374.682	385.697	416.365	349.54	343.124	345.425	389.945	359.655	404.872	327.602	404.523	403.208	338.026	362.932	235.744	277.169	266.639	367.852	371.769	313.39	349.323	377.106	345.088	402.161	356.463	401.022	355.938	345.879	343.695	346.144	347.158	499.978	376.699	425.874	380.884	345.201	355.811
feature_2440	Amhr2	16.0054	17.2751	29.4136	18.9127	22.0627	25.5962	20.1722	18.7967	12.1217	8.61272	12.7829	16.7269	7.2773	14.4907	10.4653	27.7376	18.1167	24.9491	25.0922	10.9672	28.1151	30.0503	11.5502	14.6968	18.254	11.3736	23.9766	26.4522	21.5409	12.3923	18.9029	12.7801	6.96501	16.4328	15.9588	13.2023	14.1871	13.7894	21.6175	13.4406	18.1703	14.6557	19.9991	19.8263	14.8216	28.9397	39.2912	24.2378
feature_2442	Amigo1	3896.79	3968.1	4037.93	4009.48	4226.11	3728.18	4135.3	4135.27	3763.33	3852.04	3899.86	3716.71	4161.57	4137.57	4336.81	4451.37	4462.75	4023.27	4231.28	4485.58	4055.9	4077.59	4474.14	4499.81	4228.48	3987.99	4019.43	3761.51	3572.47	3687.18	3672.14	3776.09	3454.65	3841.62	3424.75	3808.43	4120.88	4332.45	3748.47	3776.8	4076.51	3861.79	3780.84	3965.25	3991.95	4069.29	3441.72	3909.08
feature_2449	Amot	2448.83	2124.84	1730.8	1931.79	1834.51	2220.96	1780.66	1908.31	2285.41	1956.16	2112.38	2044.03	2218.54	2361.98	2948.07	2388.51	1988.01	2202.91	2545.46	1833.35	2296.88	2323.12	1992.94	2380.88	1930.63	1963.5	2014.99	2017.78	2584.07	2232.52	2261.38	1717.64	2803.91	2139.91	2367.21	2657.19	2221.7	2404.52	2620.04	3341.91	2156.82	2300.95	2107.91	2220.54	1921.87	2466.41	2884.16	2686.52
feature_2451	Amotl2	1122.51	1369.92	1336.48	842.964	955.315	995.298	1085.63	1082.15	1152.5	963.548	1381.62	1082.79	1244.42	1212.39	1351.07	1400.23	1056.81	1101.46	1106.84	1146.07	1079.37	1162.71	1099.37	1015.81	1099.53	1146.66	1099.09	1500.37	1006.62	1162.02	1098.36	1101.64	1044.75	1266.24	1174.56	1300.87	1486.81	1307.41	1369.47	1402.62	1312.8	1095.52	1329.94	1410.97	1142.25	1117.45	1142.25	1341.81
feature_2458	Amy1	921.912	1269.72	1801.58	1060.01	784.329	1589.92	1333.2	915.667	1163.69	1107.81	1166.44	1698.34	731.888	1134.14	1369.9	808.499	986.756	931.432	913.541	816.142	2139.19	1144.22	979.669	1200.81	1181.14	2449.46	1534.5	1390.33	2043.07	1439.41	1303.31	1164.69	1664.64	807.945	1588.43	1289.43	1021.47	1166.93	909.014	1753.04	855.821	1370.31	1035.96	1142.21	1263.79	993.285	1526.74	1520.2
feature_2471	Anapc16	1324.18	1260.22	1344.75	1565.25	1481.51	1270.95	1345.12	1314.87	1535.73	1469.55	1499.86	1342.61	1393.08	1496.4	1431.65	1375.58	1497.65	1568.1	1480.44	1479.66	1530.44	1671.26	1464.78	1567.37	1159.66	1197.33	1370.5	1247.49	1277.54	1305	1340.12	1483.34	1390.02	1471.65	1379.9	1241.02	1358.18	1480.64	1356.5	1251.89	1554.47	1471.07	1714.93	1514.51	1520.69	1328.42	1308.77	1558.01
feature_2474	Anapc5	6767.09	7594.15	7690.73	7411.96	7318.2	7307.71	7280.33	6689.83	6386.28	7427.39	6995.46	6918.24	6576.6	6870.51	7416.74	6633.39	7409.73	6692.82	7152.2	7061.96	7610.63	7457.09	7362.74	7202.28	7628.01	8666.68	7750.19	8065.82	7563.33	7375.32	7164.2	7436.31	7289.38	7102.61	7329.32	6915.38	7257.17	7521.25	6787.88	6851.82	6938.33	7452.45	7392.68	7166.09	7609.4	7501.91	7805.85	7472.04
feature_2482	Angel1	285.964	363.641	379.619	314.31	271.371	228.397	297.082	346.396	241.502	279.913	315.312	293.278	226.636	203.835	272.097	286.622	282.62	241.174	282.519	302.512	277.483	242.714	307.656	236.877	332.866	325.698	335.672	319.543	301.572	292.649	278.569	300.758	253.725	303.093	250.02	325.657	209.969	257.689	274.542	299.533	289.816	272.963	265.988	318.322	307.301	265.125	336.782	309.275
feature_2488	Angptl2	274.226	207.302	150.745	144.997	110.314	104.354	102.695	146.793	169.704	158.259	117.177	112.628	62.3768	129.45	41.8611	66.7757	62.8046	83.1636	79.9232	53.0081	117.35	147.94	95.5519	75.2129	67.6471	105.464	99.7426	195.747	99.4194	163.96	130.331	93.7207	120.395	99.5096	141.501	114.42	107.822	102.559	83.2272	71.0431	84.4919	70.5308	112.995	61.6817	81.0247	63.4806	130.035	63.0183
feature_2489	Angptl3	6.40217	1.72751	9.19174	5.40362	7.72195	5.90682	10.0861	4.4754	1.86488	2.15318	0	10.0361	6.23768	4.83022	1.04653	2.05464	1.20778	0.92404	4.6467	6.39753	8.55676	25.4271	10.5002	17.2903	1.07376	5.16981	1.91813	0	2.48548	1.90651	0	2.55602	0.995001	4.56466	0	0	3.78323	2.58551	4.32349	1.92008	6.35961	6.41189	2.99987	11.0146	0.988106	3.73415	4.67752	7.7561
feature_2494	Ank1	1991.07	2225.9	2618.73	1890.37	1983.44	1768.11	2146.51	2248.44	2126.9	2104.73	2355.26	2019.49	2124.97	2304.98	2673.88	2563.16	2347.92	2204.76	2275.02	2653.15	2035.29	1796.08	2492.75	1954.67	2987.21	2367.77	2557.82	2947.84	2347.95	2468.93	2352.91	2721.31	2134.28	2499.61	2495.95	2777.77	3094.68	3012.98	3022.12	3608.8	2872.73	2459.42	2290.9	3108.32	2726.18	2370.25	2783.13	2932.78
feature_2495	Ank2	18970.7	16641.1	18176.7	17394.2	16901.1	17644.6	17662.6	15633.5	15860.8	19035.2	18544.8	16399	16891.6	19391.4	19615.1	20502.2	18264	19230.2	19637	19071	17861.6	19001	19303.6	19030.6	15734.9	14506.5	17866.4	17745.2	16049.6	17096.6	17841.4	17689.4	16693.1	17049	17086.5	19170.7	17176.8	19377.5	20189.6	20607.3	18253	18035.7	17190.3	20542.2	17929.2	19158.1	17620.2	18246.2
feature_2496	Ank3	10694.8	8454.45	9481.28	7967.63	8725.8	9720.65	9172.86	8829.08	8510.38	9870.18	9791.73	8961.15	8905.33	10272	9935.73	10407.8	9741.95	10395.5	9709.74	9743.44	8710.78	10004.4	8882.12	8952.93	8668.49	8330.64	10138.3	9944.99	9212.86	9515.38	10356.8	10069.9	9157.99	9447.93	8996.48	11066.2	9212.16	9908.53	11299.4	12073.5	9791.07	10339.6	8973.61	11743.8	9293.13	10848.6	10290.6	10212.8
feature_2503	Ankib1	2855.37	2806.34	2662.85	2723.42	2643.11	3027.24	2860.79	2652.12	2813.17	2779.76	2941.14	2786.7	3297.66	3083.61	3470.28	3095.31	2607.6	2943.07	3019.43	2545.3	2612.26	2780.81	2282.74	2906.5	2546.97	2637.64	3022.97	2682.26	2868.25	2747.28	2904.08	2607.99	2840.73	2740.62	2759.8	3154.48	2706.9	2867.33	3129.13	3176.78	2750.98	2427.36	2863.88	2730.52	2537.46	2806.22	3028.23	2774.75
feature_2512	Ankrd11	8239.59	9280.2	9279.06	6967.06	8003.25	8494	8838.18	7671.74	7645.07	8150.86	9232.47	8248.59	9257.76	8657.69	10620.2	10842.3	8532.96	7773.95	9091.73	8636.67	7968.79	8488.04	8506.22	7918.97	8359.24	8367.86	8563.48	8819.18	8492.9	8780.42	9029.62	9831.3	8291.35	8506.7	8790.08	10408.7	9558.32	8785.56	10366.7	11534.9	8968.86	8478.35	7200.69	11061.9	8238.83	9353.12	8843.33	9484.74
feature_2513	Ankrd12	3792.22	3407.52	3772.29	3316.92	3571.95	4568.92	4509.41	3369.98	4176.4	5008.3	3633.55	4152.73	3985.88	3953.06	4082.5	3917.16	3339.51	3684.15	3525.92	3239.89	3546.17	4052.16	3126.96	3758.05	3209.48	3355.21	3785.42	3513.92	4172.3	3612.83	3787.54	3453.18	4277.51	3229.04	3485.39	3907.89	3176.02	3248.26	3699.83	4043.7	3167.99	4016.59	2980.87	3092.9	3151.07	3581.99	3501.6	3445.65
feature_2514	Ankrd13a	1467.16	1756.88	1715.18	1294.17	1703.24	1737.59	1781.57	1673.8	1719.42	1486.77	2042.07	1863.38	1985.66	1816.16	2285.62	1960.12	1618.43	1641.1	1815	1681.64	1987.61	1865.43	1682.13	1655.55	1686.88	1684.33	1653.42	1609.35	1855	1770.19	1839.55	1826.7	1837.77	1750.09	1966.12	1808.72	1843.38	1545.27	1841.81	1982.49	1565.37	1661.59	1769.92	1738.1	1547.37	1600.08	1900.01	1711.19
feature_2516	Ankrd13c	2082.84	2079.93	1901.77	2129.03	2089.34	2213.09	2087.82	1998.72	2318.05	2348.04	2065.51	1779.74	2505.47	2471.14	2413.29	2373.1	2180.04	2187.2	2239.71	2276.61	1964.39	2161.31	2195.59	2291.83	1987.53	1902.49	2097.47	1795.58	2140.83	2097.16	2193.73	1980.06	2061.64	1975.58	1840.58	2389.62	2223.59	2112.36	2425.48	2268.58	1903.34	1925.4	2011.91	1902.22	1933.72	2138.74	2033.79	2129.05
feature_2518	Ankrd16	280.628	429.287	564.373	341.328	322.115	394.772	354.848	294.482	360.854	331.59	367.509	495.116	287.973	306.236	343.261	348.261	264.504	316.946	286.237	309.823	415.614	337.488	348.607	291.342	300.654	577.985	357.731	500.477	344.654	347.938	366.119	390.219	326.36	353.305	444.717	321.257	297.929	345.596	298.321	326.414	269.829	302.275	287.988	380.003	402.159	315.536	371.395	366.476
feature_2523	Ankrd24	1298.57	1987.5	2860.47	1379.72	1330.38	1535.77	1606.44	1482.25	1386.54	1646.11	1629.82	1939.2	1318.23	1386.27	1456.77	1480.37	1357.54	1175.38	1221.15	1554.6	1715.02	1222.81	1697.88	1110.04	2192.62	2787.56	1866.34	2432.55	1806.12	1750.17	1489.35	2116.38	1414.89	1514.55	1717.16	1631.81	1606.93	1626.29	1528.35	1900.88	1524.49	1485.73	1384.94	1852.65	1798.35	1685.04	1823.3	1871.16
feature_2531	Ankrd34a	714.909	813.659	1003.74	1035.69	1068.94	729.492	971.017	1081.26	922.183	965.701	1033.29	841.92	1003.23	958.316	984.782	1302.64	1007.29	1072.81	920.046	1154.3	848.341	933.87	1207.52	921.574	1263.82	890.242	1024.28	1423.13	880.69	897.965	1059.56	1352.13	834.806	1223.33	1050.09	1227.82	1299.54	1310.85	1598.61	1278.78	1245.57	1078.11	1399.94	1340.48	1443.62	1250.94	1093.61	1273.94
feature_2536	Ankrd37	150.451	179.661	139.714	191.828	143.408	147.67	177.882	139.633	150.123	179.791	140.612	126.009	154.902	177.752	119.304	156.152	187.206	136.758	161.705	145.315	196.805	171.055	175.353	162.529	170.728	222.302	176.468	192.572	150.786	141.082	166.147	131.209	126.365	146.069	151.076	153.147	182.541	141.341	161.05	154.567	200.782	245.484	177.992	128.871	174.895	176.439	205.811	155.122
feature_2537	Ankrd39	264.623	366.233	503.707	438.594	463.317	332.751	347.512	488.714	359.922	423.1	467.642	475.044	379.459	346.81	344.308	340.042	299.529	318.794	277.873	361.918	343.493	302.814	339.157	321.6	350.047	442.536	363.485	466.618	375.308	366.049	435.762	469.455	390.041	451.901	356.412	398.71	318.737	380.07	354.526	360.976	345.236	277.543	375.984	410.844	439.707	346.343	475.237	335.451
feature_2538	Ankrd40	5545.34	5293.1	5094.98	4947.01	5296.15	5517.95	5551.94	5604.1	5957.36	5178.4	6074.02	5262.28	5598.32	6405.84	6796.15	6108.43	5792.51	6379.57	6207.99	5639.88	6059.41	6296.69	5624.96	5980.72	4840.52	4909.26	5515.57	6094.6	5386.04	4771.99	5553.47	5911.22	5615.79	5846.42	5929.21	5920.8	5910.35	5527.82	6149.09	6294.03	6565.84	6093.12	6723.71	6118.6	5440.51	5862.62	6954.54	6154.47
feature_2544	Ankrd50	1921.72	1486.52	1691.28	1963.31	1708.76	1723.81	1563.35	1837.6	1650.42	1878.65	1864.18	1527.72	2057.4	2391.93	1892.12	2199.49	1885.34	2065.23	1714.63	1947.59	1453.43	1770.65	1812.34	1854.39	2076.66	1667.78	1845.24	1848.48	1976.79	1942.73	1873.38	2204.99	1596.98	1853.25	1931.01	2254.96	2174.41	2298.52	2561.67	2332.9	2148.64	1992.26	2396.9	2346.11	1941.63	2395.46	1887.85	2285.14
feature_2562	Ankzf1	646.619	770.471	1099.33	635.826	656.365	761.979	827.061	722.33	739.425	755.766	756.324	809.581	580.105	656.91	681.289	718.095	655.824	708.739	603.142	581.262	1034.15	624.121	730.814	602.568	775.257	1026.73	801.777	1011.53	799.497	793.107	754.126	685.865	724.361	668.266	777.723	690.042	731.109	718.772	690.678	768.993	685.021	674.164	589.974	836.007	763.806	644.141	880.31	814.391
feature_2563	Anln	1070.23	502.706	770.268	398.967	784.329	1001.21	871.073	904.031	1343.65	911.872	1115.31	628.931	823.374	1172.78	1004.67	665.702	715.006	2006.09	1692.33	883.773	1013.36	1139.6	909.318	1035.69	753.781	829.238	1397.36	1075.02	898.088	638.68	692.443	1137.43	780.081	872.763	635.158	711.165	1159.56	569.674	1118.7	892.839	1635.33	1005.75	1382.94	1398.85	610.649	755.232	1028.12	699.988
feature_2572	Ano8	1725.38	2860.76	3278.69	1920.99	2093.75	1745.46	2113.5	2344.22	1461.13	1653.64	2754.72	2290.47	1531.35	1443.27	1920.38	2443.99	1873.27	1616.15	1565.01	1898.24	1974.17	1366.13	2356.25	1532.79	2636.09	2504.26	2175.16	3247.28	2070.41	2161.03	2112.15	2709.38	1917.37	2265.9	2507.65	2215.35	2087.4	2062.37	2198.5	2215.78	2263.11	1887.84	2052.91	2894.63	2531.53	2247.96	2244.28	2398.57
feature_2594	Aoc1	10.6703	4.31878	0	3.60241	15.4439	21.6583	16.5045	11.636	17.7164	13.9957	10.6524	25.6479	10.3961	1.93209	1.04653	5.13659	9.66224	7.39232	12.0814	2.7418	4.88958	11.5578	10.5002	6.91613	22.549	16.5434	2.87719	2.11618	9.11344	38.1301	14.9233	3.40803	5.97001	7.30345	18.0866	4.40077	9.45807	0	0	8.64037	5.45109	8.24386	1.99991	0	13.8335	14.9366	9.35505	10.6646
feature_2605	Ap1m1	2651.56	3437.75	2895.4	2698.21	2541.62	2556.67	2740.67	2718.36	2415.02	2399.72	2440.48	2888.18	2317.3	2153.31	2679.11	2400.84	2546	2327.66	2647.69	2727.18	2782.17	2316.18	3037.71	2563.29	3240.62	3298.34	2890.62	2960.54	2958.55	2781.59	2506.13	2874.67	2775.06	2779.88	2931.09	2643.11	2665.28	2722.54	2544.37	2871.48	2812.76	2776.35	2933.87	2994.87	3179.72	2967.72	3121.78	2824.19
feature_2624	Ap4m1	523.911	545.03	607.574	527.753	445.667	452.856	545.567	435.904	493.261	395.108	436.75	499.576	437.677	402.841	475.123	461.266	388.905	438.919	451.659	422.237	528.074	480.804	493.51	460.787	495.005	595.563	538.994	498.36	510.353	497.598	449.69	437.079	460.686	492.983	536.214	556.258	473.849	470.563	487.474	484.821	467.885	415.857	425.982	541.918	504.922	529.316	604.336	532.263
feature_2637	Apbb3	790.668	1069.33	1492.74	878.988	963.037	944.106	946.26	1039.19	921.251	960.318	1005.59	1224.41	959.564	829.832	940.828	951.296	856.316	815.927	737.896	775.015	971.803	691.156	999.619	725.329	1226.24	1370	1096.21	1296.16	1132.55	1096.24	1028.72	1170.66	1129.33	1090.04	1129.88	976.092	1085.79	1122.11	1011.7	843.877	1037.52	806.066	972.958	1047.49	1072.09	920.469	1060.86	1015.08
feature_2638	Apc	9229.79	8353.39	8856.24	6804.96	6976.23	8813.95	8542.93	7405.9	8278.2	8809.73	8610.37	8177.22	8655.83	9692.33	10617	10149.9	8276.92	8482.69	9219.98	7865.31	8196.15	8742.32	7869.9	8178.32	6930.06	6966.84	8611.43	7838.33	8502.01	8298.07	8460.54	8398.23	8127.17	7514.34	7794.25	10486.2	8209.6	8721.78	10336.4	11624.2	8402.86	8137.6	6797.71	9535.33	7241.83	9372.72	9805.03	8973.81
feature_2645	Apex2	169.657	195.209	236.228	179.22	212.905	168.344	209.974	167.38	165.974	183.02	157.656	226.371	258.864	234.749	312.912	280.458	178.751	189.428	160.776	216.602	187.026	194.171	232.055	193.652	212.605	212.996	183.181	183.05	195.525	176.352	189.029	202.778	234.82	191.716	223.423	235.882	277.121	298.195	248.601	252.491	173.526	173.121	269.988	196.06	262.836	214.714	199.263	239.47
feature_2647	Aph1b	2016.68	1527.12	1461.49	1839.93	1656.91	1983.71	1562.43	1630.84	1794.01	1929.25	1886.55	1709.49	1946.16	1963.97	1938.17	1713.57	1840.66	1916.46	2018.53	1821.47	1668.57	1916.28	1804.99	1928.74	1496.83	1561.28	1803.04	1463.34	1681.02	1637.69	1712.2	1414.33	1726.33	1517.29	1689.5	1746.23	1702.45	1803.82	1806.14	1770.32	1680.75	1698.23	1765.92	1406.56	1683.73	1736.38	1719.46	1719.92
feature_2679	Apol10b	7.4692	2.59127	2.75752	5.40362	14.3408	11.8136	7.33535	7.16064	5.59464	18.302	3.19573	6.69076	1.03961	2.89813	5.23264	10.2732	2.41556	1.84808	0.92934	2.7418	14.6687	6.93468	4.20008	3.45806	6.44258	4.13585	12.4678	2.11618	3.31398	3.81301	5.96934	6.81605	3.98001	10.9552	10.6392	11.442	0.945807	2.58551	2.16175	0	9.08515	0.915984	1.99991	3.30438	2.96432	7.46831	1.87101	7.7561
feature_2702	Appl2	3808.22	3457.62	4395.49	2682.9	3004.94	3935.91	3446.7	3170.38	3221.58	3408.48	3515.31	3515.99	2251.8	3132.88	2779.58	2696.71	2844.32	3671.21	3358.63	2684.22	4202.59	3018.9	3046.11	3267.01	2357.98	3829.8	3229.17	3774.21	2910.5	2870.25	3217.47	2913.86	3384.99	2707.76	3300.27	2930.04	2546.11	2404.52	2670.84	2909.89	3064.42	3122.59	2653.88	3329.71	2759.78	3030.26	3075	2906.6
feature_2715	Aqp9	48.0163	42.3241	73.5339	93.6627	79.4257	53.1613	61.4336	76.9769	30.7705	43.0636	58.5885	27.8781	19.7527	46.3701	34.5354	41.0927	66.4279	87.7838	57.6191	31.0737	55.0077	73.9699	47.2509	80.4	53.6881	74.4453	56.5847	48.6721	39.7677	43.8497	46.7598	52.8244	37.8101	37.4302	39.3649	31.6856	28.3742	48.2628	29.1836	34.5615	48.1513	47.6312	57.9975	61.6817	79.0485	59.7464	61.7433	46.5366
feature_2716	Aqr	2331.46	2220.72	1873.28	2112.81	2054.04	2399.15	2450.92	2026.46	2464.44	2267.3	2202.93	2275.97	2595.92	2484.67	2903.07	2560.08	2479.57	2222.32	2683.93	2321.39	2271.21	2477.99	2311.09	2395.57	2177.59	2045.18	2202.97	1877.05	2260.13	2054.26	2095.24	2053.34	2329.3	2002.97	2231.03	2366.74	2269.94	2180.45	2535.73	2567.15	2145.91	2196.53	2105.91	2003.55	2166.92	2213.42	2333.15	2153.29
feature_2720	Arap2	1874.77	1328.46	1484.47	2029.06	1681.18	1582.04	1863.18	1714.97	2391.71	1621.34	1858.85	1710.6	1814.13	2215.14	2012.47	1952.93	1861.19	2131.76	2159.79	1823.3	1838.48	1990.25	1465.83	2045.45	1247.71	1556.11	2038.01	1603.01	1508.69	1532.83	1640.57	1687.82	1716.38	1703.53	1629.92	1694.3	1676.92	1653.86	1872.07	1747.28	1956.03	1613.96	1740.92	1967.21	1366.55	1704.64	1895.33	1651.08
feature_2722	Arc	421.476	376.598	350.205	210.741	305.568	261.869	366.768	379.514	407.476	236.85	272.703	336.768	693.422	437.618	639.428	539.342	269.335	305.857	331.774	328.102	325.157	339.799	465.159	305.174	298.506	272.966	336.631	381.97	209.609	264.051	301.451	284.57	260.69	346.914	241.509	263.166	337.653	247.347	411.813	271.692	392.479	303.191	385.983	404.235	265.8	256.723	343.33	326.726
feature_2732	Arfgap1	2585.41	3000.69	3507.57	3093.57	3273	2941.59	3177.12	3182.01	2772.14	3376.19	2954.99	2900.44	2830.87	2638.27	2941.79	3011.07	2939.74	2925.51	2580.78	3015.98	2769.94	2769.25	3128.01	2552.92	3409.2	3482.39	3249.31	3570	3352.09	3058.99	2993.62	3436.99	2856.65	3116.75	3323.68	2900.99	3092.79	3044.87	2821.08	2948.29	3078.05	2893.59	2961.87	3352.84	3263.71	3073.21	2893.52	2996.76
feature_2741	Arg1	10.6703	1.72751	11.0301	1.80121	4.41254	2.95341	2.75076	10.741	7.45952	7.53613	12.7829	2.23025	9.35653	21.253	14.6514	5.13659	9.66224	15.7087	16.7281	18.2787	4.88958	0	14.7003	10.3742	16.1064	11.3736	14.3859	24.3361	5.79946	2.85976	8.954	9.37207	5.97001	12.781	3.19175	16.7229	17.9703	17.2367	14.0513	1.92008	25.4384	26.5635	14.9993	12.116	27.667	19.6043	4.67752	6.78659
feature_2770	Arhgap35	10141	10866.1	10252.5	9335.65	9350.17	9499.14	9684.5	9251.55	9152.83	9399.71	10725.9	9244.39	10768.3	10396.6	12567.7	12613.4	10661.1	10087.7	10882.6	10846.6	8848.91	9821.81	10597.9	9534.75	11728.7	10291	10661.9	10735.4	10251.8	10543	10301.1	11196.2	9617.68	10333.5	9794.42	12509.6	11135.9	11345.2	12912.1	13756.4	11501.8	10180.2	10461.5	12399.1	10017.4	12262	10714.3	11567.3
feature_2773	Arhgap4	107.77	156.34	214.168	120.681	153.336	157.515	135.704	109.2	105.366	144.263	138.482	168.384	110.199	95.6384	113.025	116.087	158.219	146.922	155.2	101.447	182.137	92.4624	140.703	153.019	177.171	192.317	159.204	171.411	181.44	141.082	117.397	170.401	123.38	115.942	179.802	105.619	108.768	131.861	79.9846	142.086	157.173	174.953	98.9957	182.842	122.525	98.0215	139.39	168.695
feature_2777	Arhgap5	6723.34	4894.04	4785.22	5318.96	4359.59	5775.88	4820.24	4442.29	5692.55	5390.49	5321.96	4805.08	6046.39	6325.66	6415.21	6014.95	5506.27	5781.72	6076.02	4914.22	4862.68	6100.2	4446.84	5787.94	4052.38	4327.13	4957.4	4091.63	4583.23	4855.87	5096.82	4254.92	4713.32	4333.69	4237.58	5973.61	4756.46	4722.86	6063.7	6304.59	4907.8	4425.12	4301.81	5027.06	3749.86	5608.7	5144.34	5445.75
feature_2785	Arhgef10	2044.43	1824.25	2021.26	1036.59	1765.02	1853.76	1736.64	2071.22	2072.81	1470.62	2392.54	1851.11	1835.96	2175.53	2129.68	2212.84	1808.05	2515.24	2384.69	1917.43	1894.71	1907.04	1985.59	1835.37	1657.89	1669.85	2204.89	2424.08	1963.53	1992.3	1963.91	2573.91	1998.96	2239.42	2222.52	2333.29	2523.41	1714.19	2718.4	2479.79	2944.5	2089.36	2347.9	2891.33	1820.09	2324.51	2391.15	2378.21
feature_2788	Arhgef12	9578.71	7855.86	8143.88	7634.41	7256.42	7904.3	7636.1	7663.68	7914.55	6979.53	8144.86	6836.84	7585.02	8036.53	8759.43	9159.57	8733.46	8605.59	9143.77	8456.62	8127.7	7702.11	7740.75	8059.02	8340.99	7720.6	8775.43	8405.47	7435.74	7733.75	7765.11	8116.21	7252.57	7154.65	7097.39	9026.87	7822.77	8242.6	9364.68	10261.9	9065.17	7330.62	7548.67	9960.49	7250.72	9515.55	9036.04	9147.35
feature_2796	Arhgef26	1700.84	1506.39	1769.41	1619.28	1857.68	1885.26	1697.22	1965.6	1919.89	1751.61	2087.88	1872.3	1613.48	1989.09	1888.98	1861.5	1443.3	1959.89	1933.96	1539.98	1557.33	1735.98	1248.47	1665.92	1131.75	1435.14	1582.45	1711.99	1551.77	1533.78	1932.08	1737.24	1707.42	1884.29	1910.79	1826.32	1783.79	1659.04	1981.24	1819.28	1977.84	1488.47	1772.92	1914.34	1477.22	1526.33	1871.95	1716.04
feature_2799	Arhgef33	100.301	189.163	183.835	149.5	185.327	203.785	150.375	191.547	138.001	201.322	174.7	233.061	133.071	108.197	152.793	140.743	138.895	130.29	138.472	184.615	155.244	166.432	97.6519	166.852	175.023	219.2	187.976	199.979	187.24	160.147	222.855	174.661	205.965	190.803	177.674	205.076	185.378	200.808	113.492	167.047	162.624	148.389	100.996	136.581	168.966	150.3	174.939	154.153
feature_2800	Arhgef37	84.2952	83.7844	36.767	45.9307	43.0223	73.8352	64.1843	91.2982	80.1898	63.5188	87.3501	62.4471	67.5749	107.231	82.6757	73.9669	83.3368	102.568	118.026	91.3933	127.129	62.4121	109.202	86.4516	83.7535	88.9208	55.6257	82.531	77.8785	87.6993	60.6883	99.6847	78.6051	69.3828	62.7711	88.0155	118.226	60.3286	78.9037	121.925	117.198	84.2705	112.995	104.639	44.4648	85.8855	116.003	109.555
feature_2810	Arid1b	2492.58	2662.1	2837.49	2691.9	2559.27	2345.99	2558.2	2755.95	2566.07	2901.41	2927.29	2442.13	2627.1	2830.51	3151.09	3134.35	2821.37	2715.75	2785.23	2577.29	2552.36	2584.32	2780.45	2573.66	2943.18	2472.2	2830.2	3519.21	2668.58	2673.88	2797.63	3319.42	2553.17	2875.74	2877.9	3096.39	2985.91	3129.33	3352.87	3473.43	3161.63	2820.31	2983.87	3447.57	2858.59	3050.8	3156.39	3280.83
feature_2811	Arid2	2059.36	2104.11	1936.7	1932.69	1827.89	2407.03	2250.12	1958.44	2019.66	2058.44	2158.19	2267.05	2611.51	2415.11	3050.63	2650.48	2152.26	1901.67	2381.9	2158.71	2219.87	2290.75	1917.34	2284.92	2153.97	1996.58	2260.51	1961.7	2277.53	2133.38	2165.87	2128.31	2391.98	2056.84	2109.75	2748.72	2353.17	2285.59	2706.51	3164.3	2039.62	2108.59	2024.91	2302.05	1889.26	2332.91	2324.73	2389.85
feature_2820	Arih2	2079.64	2188.76	2113.18	2083.09	2197.45	2170.75	2108	2349.59	2033.65	2152.1	2110.25	2197.91	1894.18	1953.34	2210.27	2022.79	2129.32	2059.69	2058.49	2100.22	1916.71	1678.19	1966.69	2137.08	2201.21	2295.4	2118.57	2177.55	2149.94	2060.93	2300.18	1991.99	2096.47	2119.83	2124.64	2213.59	1990.92	2000.32	1932.6	2042.97	2062.33	1924.48	1796.92	1945.18	1983.13	2029.51	2065.6	1888.61
feature_2836	Arl4d	72.5579	45.7791	78.1298	65.744	101.488	72.8507	139.372	81.4523	252.691	80.7442	171.504	123.779	126.833	142.009	87.9083	61.6391	49.519	117.353	71.5592	48.4385	111.238	50.8543	96.6019	69.1613	75.1634	36.1887	82.4794	118.506	142.501	78.1668	69.6423	241.118	123.38	105.9	93.6247	68.6521	127.684	84.46	83.2272	72.9632	106.296	98.0103	111.995	67.189	73.1198	55.0788	103.841	75.622
feature_2847	Arl9	5.33514	6.04629	7.35339	3.60241	0	0.984469	0.916919	1.79016	3.72976	2.15318	0	4.4605	1.03961	0.966045	0	1.02732	0	8.31636	0.92934	5.4836	3.66718	6.93468	4.20008	3.45806	1.07376	7.23774	6.71344	8.46472	1.65699	2.85976	1.98978	5.11204	1.99	0.912932	6.3835	0.880155	2.83742	0	4.32349	5.76025	0	1.83197	3.99983	0	1.97621	6.53477	10.2906	4.84756
feature_2860	Armcx2	5966.82	6776.17	5737.48	5533.3	6836.13	6688.48	6691.67	5886.05	4841.23	6234.53	6406.38	6839.07	5581.69	4618.66	6018.58	5499.23	5618.59	4926.06	5452.44	5425.11	5250.18	5233.37	5714.21	5704.08	6954.76	6990.62	7148.86	5727.44	7308.15	6305.77	6969.2	5981.94	6727.2	6069.17	6448.4	6739.35	5491.35	5658.82	5509.21	6633.89	5429.29	5403.39	4843.79	6129.62	6324.87	6575.84	6874.09	5628.99
feature_2861	Armcx3	2423.22	2658.64	2312.64	2376.69	2713.71	2724.03	2823.19	2429.25	2692.89	2828.2	2604.52	2753.25	2989.93	2541.66	3062.14	2621.72	2338.26	2261.13	2380.04	2591.91	2427.67	2454.88	2272.24	2504.5	2850.84	2897.16	2928.02	2512.96	3221.19	2805.43	2770.77	2826.1	3011.87	2665.76	2848.11	3142.15	2534.76	2831.99	2724.88	3149.9	2367.59	2453	2218.9	2390.17	2875.39	2784.74	2705.48	2560.48
feature_2863	Armcx5	982.733	1028.73	852.074	1046.5	1137.33	1116.39	1020.53	987.274	1078.83	1380.19	1143.01	1266.78	1005.31	789.259	801.64	968.761	943.276	866.75	911.682	817.97	976.693	961.608	869.417	979.497	847.199	1103.24	1190.2	843.298	1207.95	1038.09	1122.24	935.503	1051.72	1034.35	974.548	1049.14	689.493	891.139	700.406	672.989	837.651	844.537	706.969	709.339	883.367	955.943	834.47	752.342
feature_2865	Armt1	625.278	528.619	667.32	564.678	606.724	570.008	660.182	591.648	638.721	657.796	609.32	502.922	653.917	660.775	662.452	548.588	648.578	733.688	697.934	706.47	619.754	564.02	662.563	749.535	686.134	610.038	652.163	495.186	654.511	651.072	665.581	585.328	563.171	564.192	551.109	619.629	696.114	705.844	689.597	634.588	721.361	755.687	722.969	654.266	581.006	616.135	588.433	617.58
feature_2882	Arrb2	1158.79	1452.84	1575.46	1550.84	1448.42	1295.56	1261.68	1431.23	1172.08	1328.51	1302.79	1240.02	987.633	1134.14	1080.02	1160.87	1305.61	1328.77	1124.5	1361.76	1299.4	1174.27	1473.18	1167.96	1577.36	1530.26	1358.03	1568.09	1290.79	1228.74	1292.36	1552.36	1206.94	1475.3	1300.11	1254.22	1295.76	1284.14	1245.17	1193.33	1356.41	1492.14	1497.94	1679.72	1456.47	1301.35	1258.25	1334.05
feature_2886	Arrdc4	252.886	234.078	254.611	296.298	247.102	247.102	237.482	241.672	267.61	286.373	266.311	224.14	291.092	279.187	316.051	268.13	301.945	279.06	304.823	249.504	286.04	275.075	258.305	288.748	257.703	255.389	291.555	318.485	241.92	273.584	246.733	268.382	311.435	293.964	226.614	248.204	312.116	355.077	352.365	351.375	268.921	250.064	278.988	264.35	267.777	246.454	289.071	265.647
feature_2905	Arxes2	4285.18	3788.44	3841.23	4808.32	4243.76	4196.79	3709.85	4432.44	3611.34	4122.26	4225.83	4066.86	4175.09	4480.52	4046.92	4241.8	4288.83	4487.14	4294.48	4540.42	4070.57	4657.79	4488.84	4626.89	4471.15	3960.08	4029.98	3652.53	4217.87	3906.43	4222.31	4575.27	3689.47	4183.05	4021.61	3828.67	4048.05	4389.33	4484.54	3912.17	4514.41	4627.55	4857.79	4188.85	4534.42	4275.6	3841.18	4072.92
feature_2911	Asap3	349.985	427.559	569.888	398.066	384.994	380.99	320.922	367.878	286.259	294.986	398.401	357.955	286.933	346.81	396.634	380.108	398.567	394.565	414.486	400.303	446.174	369.849	350.707	401.135	333.94	435.298	393.216	489.896	344.654	329.826	357.165	391.923	375.116	372.476	358.54	345.021	349.948	352.491	343.718	346.575	336.151	339.83	365.984	483.54	429.826	394.887	311.523	402.348
feature_2933	Ascc3	1737.12	1604.86	1103.01	1368.92	1475.99	1727.74	1512.92	1189.56	1450.88	1428.63	1433.82	1541.1	1884.82	1732.12	2044.91	1783.42	1480.74	1582.88	1808.5	1570.14	1513.32	1657.39	1378.68	1617.51	1376.56	1349.32	1505.73	1226.33	1434.95	1384.12	1370.96	1317.2	1589.02	1212.37	1123.5	1729.5	1480.19	1509.08	1599.69	1969.05	1380.03	1363.9	1347.94	1393.35	1155.1	1631.82	1475.29	1556.07
feature_2979	Atad3a	1175.86	1455.43	1853.97	1234.73	1365.68	1330.02	1220.42	1168.98	1205.64	1319.9	1403.99	1387.22	1215.31	1062.65	1233.86	1142.38	1196.91	1161.52	1170.04	1181.72	1400.86	1093.37	1299.93	1148.94	1493.6	1506.48	1353.24	1665.43	1338.02	1371.73	1346.09	1423.7	1320.37	1229.72	1390.54	1221.66	1311.83	1287.58	1145.73	1388.22	1293.73	1123.91	1234.95	1319.55	1343.82	1390.04	1345.26	1286.54
feature_2998	Atg12	2074.3	1764.65	1903.61	2233.5	2040.8	1986.66	1997.97	1841.18	2225.73	1987.38	1759.78	1868.95	2257	2297.25	2122.36	2031.01	1973.51	2204.76	2145.85	2104.79	2217.42	2228.34	2062.24	2144.86	1803.92	1746.36	1788.65	1650.62	1916.31	1937.96	1915.16	1820.74	1953.19	1975.58	1833.13	1979.47	2154.55	2157.18	1988.81	1795.28	1948.77	2057.3	2151.91	1861.47	1959.41	1732.65	2001.98	2066.03
feature_3036	Atp13a4	1319.91	969.998	1326.37	1096.93	1004.96	1180.38	1092.05	1185.98	1065.78	922.638	1239.94	1194.3	863.919	1169.88	1220.25	1159.84	1195.7	1292.73	1291.78	1112.26	1250.51	1308.34	1020.62	1269.97	856.863	1121.85	1100.05	1123.69	955.254	847.442	1185.91	1127.2	1144.25	1132.04	1109.67	1249.82	1036.6	1061.78	1160.86	1090.61	1193.79	1257.65	1296.94	1318.45	1054.31	1365.77	1232.06	1254.55
feature_3043	Atp1b2	30191.6	29848	27735.2	23993	27599.3	27474.6	25757.2	28281	26472	22481.3	30902.7	26947	23015	27322.6	29799.9	28661.1	27647.3	29201.5	32055.7	27039.6	29822.7	30739.1	31484.9	29588.9	26525.2	26108.6	28228.1	29453	28869.7	27142.9	29625.8	27279.5	25825.3	28812.1	29815.2	27280.4	28895.3	26200.7	32445.6	30121.3	31446.4	30270.5	33638.5	30447.6	28231.2	27607.5	29627.4	28509.5
feature_3047	Atp2a2	34541.8	31125.5	28571.6	27257.6	27732.8	30723.3	30783.7	29301.4	29306.6	33817.8	31677.2	31641.7	33585.8	33078.3	38396	36238.6	33823.9	30886	33598.4	33975.5	28358.3	30790	30819.1	31916.2	31909	29518.6	31113.9	28501.8	29833.3	29262	30450.6	29246	29688.9	28374.8	27891.6	33981	32437.4	32066.3	35071.1	36248.3	32507.6	30062.6	30752.7	32834.5	27625.5	32704.6	31416.1	31674
feature_3053	Atp2c1	6226.11	4678.97	4980.09	5808.89	4797.53	5247.22	5059.56	4871.92	5316.77	5283.9	5038.61	4714.75	5556.74	6171.09	5621.95	5819.76	5658.45	6338.91	5651.32	5766.92	5025.26	5540.81	5420.21	6039.51	5139.03	4764.5	5115.64	4907.42	5647.02	4990.28	5123.68	5138.45	5466.54	4944.44	4570.59	5373.35	5637.01	5753.62	5915.62	5761.21	5674.59	5476.67	6153.73	5720.98	4720.18	5738.46	4933.85	5459.33
feature_3055	Atp4a	30.9438	59.5992	54.2313	37.8253	78.3226	44.3011	44.929	44.754	27.9732	53.8295	77.7629	42.3748	40.5449	18.3548	17.791	39.0381	31.4023	33.2654	31.5976	55.7499	50.1182	23.1156	42.0008	62.2452	32.2129	75.4793	72.8888	32.8008	55.5091	49.5692	49.7445	52.8244	36.8151	74.8604	53.1958	38.7268	46.3445	41.3681	35.6688	30.7213	37.2491	28.3955	10.9995	50.6671	50.3934	31.7403	29.9362	25.2073
feature_3116	Atrip	510.039	599.447	703.168	602.503	634.303	609.386	661.098	644.458	521.234	710.549	644.473	674.651	648.719	597.016	647.8	581.462	589.397	598.778	547.381	555.671	606.307	568.643	648.913	491.91	685.061	721.706	651.204	672.945	690.964	649.166	719.305	711.425	668.641	624.445	598.985	690.042	599.641	646.377	688.516	624.027	617.79	588.978	522.977	656.469	599.78	646.008	718.468	623.397
feature_3118	Atrnl1	2648.36	2273.41	2311.72	1902.97	1944.83	1948.26	2342.73	2521.44	2269.56	2391.11	2222.1	1784.2	1928.48	2622.81	2356.78	2516.93	2497.69	2442.24	2615.16	2817.66	2280.99	2410.96	2466.5	2630.72	2588.84	2290.23	2471.51	2242.09	2339.67	2287.81	2304.16	2445.26	2112.39	2448.48	2152.3	2329.77	2422.21	2126.15	2895.66	2563.31	2612.89	2585.82	2323.9	2640.2	2022.65	2773.54	2590.41	2538.18
feature_3120	Atxn1	1629.35	1442.47	1486.3	1425.65	1303.91	1592.87	1661.46	1603.09	1839.7	2274.83	1508.39	1489.81	1508.48	1705.07	1528.98	1647.82	1492.82	1475.69	1560.36	1561	1671.01	1433.17	1475.28	1516.36	1482.87	1533.37	1614.1	1565.97	1607.28	1641.5	1468.46	1406.66	1429.82	1476.21	1613.96	1682.86	1553.01	1666.79	1698.05	1890.32	1460.89	1480.23	1379.94	1438.5	1465.36	1356.43	1621.23	1481.42
feature_3123	Atxn2	3037.83	3364.33	3673.94	3427.69	3407.58	3100.09	3386.18	3379.82	3312.96	3477.39	3632.48	3555.02	3531.57	3324.16	4100.29	4059.96	3331.06	3452.21	3314.96	3522.3	3415.37	3474.27	3339.06	3203.03	3743.14	3479.28	3611.83	3494.87	3409.26	3666.21	3451.27	3776.09	3407.88	3506.57	3517.31	3833.07	3732.15	3848.96	4023.01	4228.02	3647.69	3305.79	3970.83	3660.15	3858.55	3688.41	3436.11	3738.44
feature_3145	Avpr1a	576.195	745.422	550.585	373.75	540.536	628.091	591.413	663.255	967.873	450.015	937.415	861.992	1004.27	932.233	2279.34	1241	1297.16	874.142	1544.56	997.101	1738.24	1386.94	939.768	1066.81	610.971	328.8	511.181	680.352	949.455	642.493	711.346	552.1	1063.66	837.158	739.422	644.273	1048.9	833.396	822.544	1308.54	981.197	1114.75	886.962	773.224	709.46	795.375	1192.77	1076.16
feature_3155	Azi2	2927.93	2352.01	2553.47	2833.3	2578.03	2817.55	2835.11	2472.21	2889.63	3037.06	2397.87	2491.19	3064.78	3114.53	2883.18	2543.64	2674.02	3002.21	2833.56	2983.99	2985.09	3111.36	2646.05	3085.46	2544.82	2399.83	2528.09	2341.55	2725.75	2544.23	2484.24	2384.77	2689.49	2525.17	2459.78	2600.86	2713.52	2669.97	2687.05	2821.56	2528.4	2716.81	2559.89	2454.05	2624.41	2708.19	2562.35	2577.93
feature_3204	B3gntl1	199.534	289.358	293.217	244.964	258.134	244.148	200.805	180.806	207.934	193.786	238.615	253.134	160.101	206.734	207.212	207.518	218.608	215.301	236.982	189.184	239.589	226.533	224.704	216.994	223.343	241.947	257.988	212.676	246.063	283.116	195.993	190.849	238.8	220.929	219.167	236.762	159.841	171.505	193.476	264.011	228.946	167.625	156.993	216.987	230.229	236.185	210.489	195.842
feature_3229	B9d1	388.398	450.017	527.606	467.413	441.254	344.564	411.697	346.396	412.138	316.517	358.987	453.856	384.657	423.128	399.773	321.55	386.49	439.843	415.415	397.561	470.622	436.885	392.708	370.877	360.784	385.668	393.216	448.63	363.709	436.59	424.818	414.927	391.036	411.732	383.01	360.864	427.505	332.669	346.96	327.374	387.028	429.596	413.982	327.133	416.981	388.352	439.687	459.549
feature_3242	BC005537	5988.16	6139.58	5646.49	5273.03	5645.85	6823.36	6391.84	5578.14	6050.6	6240.99	6573.62	6553.6	5727.23	5534.47	6666.38	5912.21	5756.28	5987.78	6068.59	5404.09	6728.06	5552.36	5905.31	5866.61	5683.43	6386.79	6274.19	5554.97	6784.54	5946.4	5921.58	5555.93	6491.39	5440.16	6028.15	6178.69	5473.38	5767.41	5727.54	6397.72	5382.95	5199.12	5045.78	5223.12	5282.41	5587.23	6138.78	5485.5
feature_3302	BC051628	20.2735	20.7302	13.7876	22.5151	24.269	13.7826	19.2553	23.2721	10.2568	16.1488	27.6964	12.2664	2.07923	14.4907	5.23264	9.24586	15.7011	13.8606	7.43472	13.709	14.6687	16.1809	14.7003	23.3419	18.254	27.917	21.0994	15.8713	20.7124	35.2704	24.8722	28.9682	16.915	26.475	24.4701	18.4833	20.8077	18.0986	14.0513	8.64037	16.3533	32.9754	14.9993	14.319	18.774	20.5378	16.8391	32.9634
feature_3315	BC068281	240.081	237.533	318.953	271.982	245.999	294.356	263.156	221.98	273.205	268.071	309.986	284.357	402.331	363.233	395.587	356.479	310.399	296.617	290.883	285.147	265.259	332.864	305.556	323.329	309.244	259.525	270.456	213.734	308.2	346.984	312.395	274.346	314.42	304.006	253.212	345.021	349.948	354.215	364.254	459.86	296.176	213.424	268.988	287.481	261.848	323.004	295.62	384.897
feature_3335	Bag2	338.248	381.78	383.296	479.121	390.51	402.648	358.515	426.058	415.868	388.649	412.25	379.143	538.52	592.185	537.915	495.167	423.931	515.614	431.214	492.61	460.843	503.92	426.308	439.174	398.366	312.257	328	483.547	394.363	463.281	400.94	436.227	465.661	489.331	487.274	389.909	553.297	472.286	530.709	430.099	441.538	531.271	533.977	408.641	478.243	431.295	396.654	540.988
feature_3336	Bag3	519.643	588.218	557.02	403.47	416.985	387.881	385.106	452.016	419.598	235.773	423.967	391.409	560.352	540.985	480.356	507.495	444.463	462.02	466.529	392.991	492.625	589.447	475.659	444.361	473.529	448.74	384.584	524.813	366.195	463.281	450.685	466.047	485.561	364.26	421.311	432.156	630.853	534.339	540.436	552.024	492.415	491.883	582.975	476.932	421.921	423.826	429.397	477.97
feature_3344	Baiap2l2	33.0779	20.7302	46.8779	27.9187	26.4752	11.8136	22.0061	34.0131	23.311	18.302	24.5006	28.9933	19.7527	21.253	26.1632	17.4644	64.0123	36.0376	34.3856	33.8155	89.2348	60.1005	65.1013	64.8387	39.7292	44.4604	36.4444	55.0207	25.6833	27.6444	16.9131	19.5961	23.88	16.4328	23.4062	28.165	34.049	24.9933	22.6983	18.2408	59.0535	62.2869	46.998	56.1744	48.4172	64.4141	79.5179	63.0183
feature_3352	Banp	583.664	628.815	1063.48	707.874	590.177	801.358	787.633	516.462	725.438	505.997	612.516	770.552	1260.01	1197.9	1401.3	1392.02	588.189	840.876	700.722	857.269	1174.72	1084.12	698.264	900.826	708.683	610.038	590.783	740.663	901.402	880.806	656.627	865.638	945.251	748.604	1017.1	939.125	1335.48	1104.87	1380.27	1263.41	734.989	895.832	1123.95	788.644	830.997	694.552	783.953	1049.98
feature_3400	Bckdk	1121.45	1307.73	1313.5	1188.8	1267.5	1258.15	1204.83	1265.64	1154.36	1102.43	1333.69	1279.05	1164.37	1079.07	1167.92	1139.3	1210.2	1055.25	1203.5	1242.95	1193.06	1269.05	1304.13	1130.79	1320.73	1169.41	1265.96	1325.79	1179.78	1230.65	1140.14	1335.95	1134.3	1308.23	1273.51	1104.59	1083.89	1046.27	955.492	1128.05	1211.96	1337.34	1278.94	1197.29	1317.14	1269.61	1254.51	1110.09
feature_3430	Bcr	5506.93	5645.51	5449.78	5207.29	5578.55	5297.43	5822.43	5609.47	5103.24	5221.46	6094.26	5650.34	5532.83	5282.33	6734.4	6484.43	5489.36	5827	6041.64	5610.64	5354.09	5598.6	5779.31	5768.05	6050.65	5568.92	5974.96	6445.88	6056.3	6352.48	6036.99	6135.3	5825.73	6053.65	6009	6813.28	6305.69	6278.48	6813.82	7430.72	6649.42	5631.47	6325.73	7052.64	6004.72	6717.74	6402.6	6643.1
feature_3442	Bend3	483.364	610.676	410.871	395.365	418.088	396.741	408.946	381.304	274.137	278.837	398.401	347.919	257.824	297.542	296.167	310.25	339.386	292.921	455.377	312.565	378.942	351.357	380.107	379.523	387.628	473.555	404.725	334.356	321.456	395.6	325.329	273.494	373.126	317.7	386.202	352.942	289.417	254.242	295.078	344.655	367.949	351.738	269.988	340.351	351.766	319.27	435.01	356.781
feature_3443	Bend4	804.539	729.874	732.582	707.874	669.603	705.864	693.191	672.206	694.668	799.906	759.519	746.019	904.464	886.829	1067.46	958.488	870.809	658.841	816.89	788.724	647.869	765.126	815.866	726.194	817.133	699.993	852.607	741.721	761.387	761.65	699.407	674.789	772.121	698.393	736.23	1020.98	816.231	870.455	958.734	1042.61	738.623	660.424	817.965	799.659	594.84	818.713	800.792	809.543
feature_3452	Bex1	6292.26	6935.1	6168.58	7529.04	7677.82	6976.93	6277.23	6048.95	5622.61	7561.97	6516.1	6721.98	6979.97	5430.14	5851.13	5876.26	5686.23	6269.61	5826.03	5814.44	5638.9	6555.58	6520.63	6405.2	6319.09	6192.4	6559.03	5228.02	7699.2	6426.84	6506.58	5482.66	7857.53	6432.52	7563.38	5581.06	6132.61	6459.46	5517.86	4893.33	4877.82	6210.37	6014.74	5659.29	7547.15	5436.93	5399.73	5601.85
feature_3453	Bex2	15813.4	19856	16308	19232.4	18670.6	17395.6	16803.5	17108.6	14463.1	16745.3	17718.2	17147.3	15655.5	13987.4	15141.2	15651.2	15140.7	16248.3	14595.3	14873.3	14997.6	16573.9	16675.4	16632.4	17111.5	16867	17371.5	14869.3	21660.2	17155.7	17220.5	15932.5	20474.1	16965.9	19647.4	14989.9	16079.7	17518.5	15952.6	14605.1	14389.1	17737.1	18232.2	15771.8	19508.2	15930.8	16417.2	15473.4
feature_3466	Bhlhe22	170.724	152.021	213.248	199.934	257.03	190.003	358.515	194.232	343.138	464.01	177.896	192.917	265.102	178.718	94.1875	154.098	192.037	158.011	146.836	160.852	255.48	217.287	278.255	208.348	222.269	193.351	162.082	241.245	197.182	197.323	192.014	193.405	136.315	116.855	177.674	242.043	144.708	112.901	189.153	165.127	128.101	137.398	152.993	133.276	183.788	127.895	117.874	159
feature_3468	Bhlhe40	2043.36	1908.9	1846.62	1886.76	2173.18	2560.6	2461.93	2213.53	2077.48	2339.43	2023.96	2158.88	1512.64	1948.51	1462	1973.48	1731.96	1900.75	1823.36	1457.72	1638.01	1590.35	1869.04	1799.06	2013.31	1873.54	2021.71	1933.13	2375.29	2118.13	2423.55	2167.5	1919.36	2115.26	1828.87	1769.99	1723.26	1526.31	2045.01	1484.22	1850.65	1737.62	2116.91	1712.77	1735.11	2008.04	1664.26	1823.65
feature_3469	Bhlhe41	3999.22	5338.01	4045.29	3388.97	3966.87	4882.97	4701.04	4840.6	3257.95	3750.84	4315.31	3546.1	2686.36	3322.23	2804.69	3046	2568.95	2676.94	2546.39	2632.13	3157.44	3455.78	2689.1	3336.17	3880.58	4034.52	4011.76	3602.8	3966	3787.28	4107.9	3886.85	3562.11	3620.69	3358.79	3303.22	3064.41	2685.48	3016.72	2448.11	3036.26	2710.4	3020.87	2856.08	3032.5	3459.69	3094.65	2691.37
feature_3516	Bmpr1a	3735.67	2843.49	2690.42	3063.85	2987.29	3359.01	3206.46	3127.41	3513.43	3293.29	3437.54	3190.38	3459.84	3870.94	3983.08	3266.87	3279.12	3345.95	3843.75	3141.19	3167.22	3698.49	2845.56	3618.86	2738.1	2818.58	3323.15	2966.88	3284.98	3054.22	3333.87	2940.27	3279.52	3130.44	3250.27	3504.78	3173.18	3112.09	3576.61	3711.52	3362.42	3090.53	3237.86	2977.24	2716.3	3314.06	3639.11	3267.26
feature_3517	Bmpr1b	1978.27	1409.65	1335.56	1047.4	1324.87	1571.21	1386.38	1226.26	1530.13	1187.48	1478.56	1196.53	1314.07	1494.47	1942.35	1401.26	1446.92	1645.72	1926.52	1327.03	1521.88	1588.04	1407.03	1765.34	950.28	1168.38	1401.19	1197.76	1251.03	1094.34	1375.93	1212.4	1350.22	1271.71	1216.06	1424.09	1221.98	1233.29	1409.46	1629.19	1501.78	1387.72	1413.94	1434.1	1254.89	1578.61	1480.9	1463.96
feature_3531	Bod1l	5077.99	4637.51	4784.3	4412.05	4543.81	5038.51	4807.41	3919.56	5219.8	4969.54	4198.13	4473.89	5375.84	5550.89	5830.2	5647.17	5159.64	4934.37	5051.89	5211.25	4906.69	5367.44	4441.59	4911.32	4742.81	4424.33	4835.6	5043.91	5032.28	4978.84	4838.15	5018.32	4947.15	4280.74	4641.87	5637.39	5003.32	5118.45	5458.41	6203.79	4911.43	5144.17	4103.82	5294.71	4596.67	5311.83	4777.62	5061.83
feature_3558	Bptf	7907.75	7940.51	6995.83	6365.46	6705.96	7448.49	7127.21	6286.15	6721.96	6982.76	7845.53	7031.98	8361.61	7735.12	9762.01	9648.57	7933.91	6569	8134.51	7502.48	7075.22	7334.58	6727.48	7108.92	7643.04	6731.1	7942	6906.15	7435.74	7730.89	7127.39	7499.36	7452.56	6537.5	6832.47	9749.48	7961.8	7729.81	8768.04	11212.3	7684.22	7112.61	6187.73	9019.84	6913.78	8620.29	8173.51	8230.19
feature_3560	Brap	1858.76	2137.8	2177.52	1854.34	2137.88	1842.93	2070.4	1972.76	2001.95	2058.44	2080.42	2098.67	2193.59	1983.29	2232.24	2246.74	2018.2	2056.91	1963.7	1854.37	1993.72	1923.22	1876.39	1872.54	2141.08	2157.88	1906.62	1997.67	2080.35	1984.67	2025.59	2089.97	2098.46	2114.35	2022.51	2138.78	2139.41	2180.45	2047.17	2180.25	2063.24	1959.29	1974.91	2217.24	1994.99	1981.9	1962.69	2019.5
feature_3566	Brd2	6808.71	9115.22	7741.28	7246.25	7671.2	7947.62	8656.63	7975.17	7480.97	7343.42	8352.58	8093.58	8124.58	7046.33	8338.73	7771.66	7758.78	6328.75	7454.23	7039.11	7853.88	7815.38	7143.29	7701.97	8339.92	7962.55	7458.63	8183.27	7923.72	7588.85	8335.18	7924.51	7752.06	7868.56	8173.01	8035.81	7538.08	6980.01	7122.95	8404.2	7500.7	7787.7	6991.7	7520.76	7432.53	7712.89	8028.5	7385.75
feature_3567	Brd3	3017.56	3512.03	3806.3	3050.34	3321.54	3361.96	3350.42	3381.61	3192.67	3366.5	3581.35	3386.64	3843.45	3331.89	4262.51	3990.1	3451.83	3147.28	3414.39	3393.43	3387.25	3079	3668.77	3078.54	3956.82	3468.95	3551.41	3584.81	3722.43	3654.77	3423.41	3780.35	3697.43	3639.86	4041.82	4073.36	3809.71	3928.25	4211.08	4607.24	3465.99	3986.36	3675.84	4115.05	3716.27	3482.1	3698.05	3807.28
feature_3571	Brd9	2159.66	2244.9	2401.8	2406.41	2065.07	2000.44	2143.76	1869.82	2199.63	2278.06	1896.14	1993.85	1847.39	1957.21	1753.98	1813.22	2096.71	2057.84	2010.16	2128.55	2389.78	2078.09	2050.69	2161.29	2088.47	2498.05	2143.51	1826.26	2237.76	2067.61	1963.91	2107.86	1871.6	1888.86	2004.42	1752.39	1954.98	1938.27	1668.87	1931.6	1961.48	2152.56	1952.92	1981.52	2153.08	2127.53	2061.85	2003.98
feature_3603	Bspry	39.48	50.9616	53.3121	56.738	23.1658	27.5651	30.2583	47.4393	27.9732	32.2977	45.8055	52.4109	23.9111	23.1851	34.5354	27.7376	53.1423	17.5568	23.2335	26.5041	30.5599	27.7387	33.6007	30.2581	32.2129	41.3585	57.5438	60.3111	44.7387	47.6627	24.8722	33.2282	34.8251	31.9526	52.1319	32.5657	21.7536	19.8222	29.1836	38.4017	20.8959	42.1353	28.9987	47.3627	40.5123	40.1421	29.9362	31.9939
feature_3604	Bst1	11.7373	14.6839	14.7068	9.90663	19.8564	18.7049	14.6707	20.5869	23.311	20.4552	22.3701	16.7269	19.7527	11.5925	6.27916	11.3005	18.1167	5.54424	1.85868	8.2254	8.55676	13.8694	4.20008	11.2387	11.8114	12.4076	18.2222	11.639	6.62796	6.67277	6.96423	11.0761	23.88	12.781	17.0227	22.884	16.0787	5.17102	10.8087	13.4406	9.99367	10.0758	5.99974	6.60875	12.8454	12.136	4.67752	7.7561
feature_3616	Btbd3	3701.52	3404.93	3370.61	3977.06	3609.46	4232.23	3783.21	3646.56	3986.18	4555.05	3557.92	3392.21	4125.19	3714.44	3810.41	3643.9	4055.72	4070.4	4164.37	4121.84	3975.23	3890.35	3881.93	4030.37	3335.11	3151.52	3369.19	3097.03	3360.37	3254.41	3275.18	3391.84	3371.06	3590.56	3071.53	4006.47	3482.46	4236.79	3910.6	3375.51	3570.47	3364.41	3415.85	3347.33	3276.56	3386.88	3332.27	3331.25
feature_3676	C130074G19Rik	515.375	517.39	443.042	543.064	595.693	526.691	945.343	586.278	726.371	522.146	809.586	740.444	864.959	529.393	1258.97	730.423	771.771	464.792	758.341	765.876	1479.1	1416.99	788.565	889.587	241.597	409.449	346.222	404.19	214.58	274.537	316.375	289.682	415.911	304.006	356.412	314.215	366.027	396.445	279.946	326.414	377.034	431.428	263.989	396.525	365.599	261.391	478.043	349.994
feature_3689	C1ql3	6330.68	11301.4	4911.15	6197.05	7924.92	10687.4	11358.8	6861.69	5238.45	7720.23	8253.52	12201.7	7267.94	2719.42	6621.38	4806.82	3710.3	1907.22	3186.71	3037.91	3514.38	3703.12	3423.07	4656.28	2173.3	3322.12	2180.91	1477.09	3434.94	3194.35	4161.62	1378.55	5517.28	2417.44	1925.69	2095.65	2055.24	2451.92	1288.4	1558.15	1175.62	1830.14	1238.95	1162.04	2180.75	1342.43	1399.52	1120.76
feature_3704	C2	132.311	63.0542	149.825	127.886	112.52	162.437	133.87	124.416	177.164	107.659	120.373	152.772	231.834	181.616	139.188	158.207	236.725	192.2	157.058	243.106	166.246	189.548	126.002	127.948	158.917	76.5132	107.415	129.087	185.583	166.819	170.126	201.925	105.47	165.241	139.373	102.978	221.319	176.676	197.8	186.248	260.744	187.777	200.991	196.06	128.454	89.6197	128.164	150.274
feature_3707	C230024C17Rik	40.5471	74.283	24.8177	35.1235	47.4348	79.742	70.6027	36.6983	48.4869	32.2977	69.2409	89.2101	17.6734	7.72836	27.2097	25.6829	13.2856	7.39232	24.1628	7.31147	40.339	18.4925	12.6002	15.5613	24.6965	34.1208	36.4444	5.29045	40.5962	21.9248	53.724	14.4841	49.7501	13.694	22.3423	22.884	17.0245	11.2039	3.24262	22.081	9.99367	10.0758	6.9997	5.50729	12.8454	14.9366	19.6456	13.5732
feature_3733	C330027C09Rik	160.054	95.877	108.463	133.289	136.789	141.764	123.784	111.885	134.271	143.186	148.069	107.052	119.556	105.299	124.537	108.896	89.3757	109.037	112.45	98.7048	122.239	113.266	148.053	87.3161	69.7946	120.974	132.351	77.2406	131.731	130.596	139.285	97.1287	131.34	142.417	120.223	100.338	76.6103	107.73	83.2272	97.9242	84.4919	85.1865	105.995	103.537	104.739	97.088	101.97	105.677
feature_3748	C630031E19Rik	6.40217	6.04629	11.0301	3.60241	14.3408	11.8136	10.0861	15.2164	10.2568	13.9957	5.32622	21.1874	9.35653	13.5246	31.3958	3.08195	19.3245	24.9491	32.5269	18.2787	15.8911	9.24624	18.9004	34.5806	4.29505	10.3396	19.1813	13.7552	11.5989	18.1118	9.94889	19.5961	7.96001	15.5198	5.31958	15.8428	13.2413	11.2039	5.40436	8.64037	21.8044	21.9836	17.9992	18.7248	16.7978	14.9366	21.5166	19.3903
feature_3751	C730002L08Rik	18.1395	0	3.6767	3.60241	14.3408	5.90682	52.2644	11.636	32.6354	6.45954	4.26098	12.2664	7.2773	8.6944	1.04653	2.05464	7.24668	12.0125	10.2227	3.65573	24.4479	4.62312	16.8003	16.4258	6.44258	6.20378	4.79532	6.34854	9.11344	11.439	9.94889	4.26003	1.99	10.0422	4.25567	7.04124	1.89161	8.61836	3.24262	0.960042	3.63406	0.915984	4.99978	1.10146	6.91674	0	0	2.90854
feature_3768	C920021L13Rik	32.0108	25.9127	22.0602	29.7199	28.6815	38.3943	38.5106	23.2721	30.7705	25.8382	43.675	46.8353	20.7923	27.0493	27.2097	20.5464	25.3634	16.6327	27.8802	21.9344	40.339	11.5578	31.5006	41.4968	31.1391	34.1208	51.7894	17.9875	37.2823	15.2521	27.8569	21.3002	27.86	38.3431	22.3423	22.0039	19.8619	11.2039	20.5366	19.2008	25.4384	15.5717	9.99957	5.50729	29.6432	19.6043	33.6782	13.5732
feature_3775	Cables1	1172.66	1303.41	1483.55	1069.92	1277.43	1432.4	1474.41	1497.47	1546.92	1281.14	1837.55	1642.58	1603.08	1883.79	1898.4	1986.83	1355.13	1617.99	1658.87	1541.81	1300.63	1319.9	1546.68	1403.97	1270.26	1082.56	1212.26	1610.41	1602.31	1752.08	1510.24	1928.09	1757.17	1911.68	1953.35	1781.43	2237.78	1584.92	2264.43	1948.88	1875.18	1834.72	2089.91	2098.28	1391.25	1387.24	1628.71	2003.98
feature_3785	Cachd1	1227.08	1046.01	1019.36	1307.68	1160.5	1040.58	1033.37	1162.71	1047.13	1395.26	1299.6	1038.18	1229.86	1316.72	1123.97	1244.08	1186.04	1270.56	1118	1170.75	980.36	991.659	1068.92	933.677	1171.48	1094.97	1142.24	1227.38	884.832	1241.14	1176.95	1181.73	915.401	1214.2	1201.16	1464.58	1482.08	1271.21	1472.15	1229.81	1385.49	1077.2	1130.95	1268.88	1118.54	1176.26	816.696	1135.3
feature_3798	Cacna2d3	3890.38	4401.7	3305.35	3171.02	2795.34	3547.04	3708.94	3100.56	2843.01	3301.9	4141.67	3371.03	2665.57	3011.16	4652.86	2992.58	3426.47	3215.66	4860.45	3699.6	4585.2	5166.33	3751.72	4687.41	3503.69	3422.42	4127.81	3389.06	3536.84	2908.38	3325.92	3051.03	3338.23	3040.06	3461.99	3819.87	3310.32	3378.4	3712.8	3867.05	3280.65	4113.68	3221.86	3379.27	3369.44	3580.12	4945.08	3510.61
feature_3805	Cacng2	2679.31	2426.29	2854.95	2473.96	2709.3	2585.22	2866.29	2881.26	2909.21	3810.05	2450.06	2446.59	2933.79	3215.96	2827.72	2996.69	3012.2	3237.84	2803.82	3181.4	2801.73	2697.59	2681.75	2762.13	3033.38	2555.96	2702.64	2704.48	2840.91	2680.55	2708.09	2792.88	2656.65	2831.91	2577.87	2512.84	2763.65	2742.36	2977.8	2921.41	2893.62	3671.26	2861.88	2651.21	3010.76	2750.2	2284.5	2642.89
feature_3814	Cacybp	5927.34	4645.28	4672.16	7512.83	5506.85	5865.47	5319.96	5249.65	6121.47	6783.59	4584.81	5103.93	7100.56	7497.47	6367.07	5319.45	6726.13	6655.86	6110.41	6655.26	6305.11	8106.64	5804.51	7155.6	5337.67	5298.03	5096.46	4791.03	6074.52	5139.94	5422.15	5035.36	6419.75	5284.96	5356.82	5060.89	6125.99	6290.54	5708.09	5847.61	5028.63	6839.65	7027.7	4817.78	5569.95	5394.92	5059.21	5538.83
feature_3843	Calr	23043.5	16998.7	15321.7	22656.5	19603.8	18608.4	17654.4	17256.3	19994.3	19756.5	16039.4	17718.2	22319.5	22336.9	22542.2	20215.6	22217.1	24510.2	22075.5	24197.3	21676.7	26014.3	22085.1	23278	19752.9	19454	18156	16297.8	19881.4	17814.4	17812.5	17301.7	20894	16784.3	16846.1	16220.4	20730.2	22727.5	18732.6	19378.4	20233.5	25035.7	24534.9	18706.1	20475.5	20175.6	17361.1	18500.2
feature_3858	Camkk1	2606.75	2673.33	3428.52	2527.99	3376.7	2690.55	3129.44	3118.46	2659.32	2892.8	2913.44	2829.07	2715.47	2708.79	2168.4	3003.88	2890.22	2707.44	2386.54	3091.84	2447.23	2177.49	3110.16	2492.4	3565.97	3250.78	3148.6	3230.35	2938.67	3182.91	2994.62	3206.1	2209.9	3058.32	2761.93	2730.24	2764.59	2761.32	2919.44	2247.46	2929.96	2721.39	2308.9	2915.56	3011.75	2666.19	2251.76	2707.85
feature_3864	Camsap1	4382.28	4647.87	4666.65	4563.35	4710.39	4428.14	4912.85	4375.15	4513.01	4845.73	4782.95	4700.26	5573.37	5103.61	5906.6	6107.4	5134.27	4635.91	4907.84	5522.9	4659.77	4641.61	5190.25	4681.35	5566.39	5032.3	5201.96	4750.82	5073.7	5310.58	4965.49	5275.62	4530.24	4755.46	4830.18	5677.88	5576.48	5651.92	6247.44	6125.07	5178.54	4683.43	4776.79	5611.93	5048.23	5412.65	4911.4	5250.88
feature_3873	Cap1	6376.56	5882.18	6379.99	6737.41	5949.21	5785.73	6470.7	5809.97	7049.25	6137.64	6113.44	6141	6631.7	6477.33	6666.38	6755.64	6496.65	6736.25	6703.33	6639.72	6740.28	6851.46	6629.83	6531.42	6489.82	5757.1	6380.65	6706.17	6588.19	6138	6074.79	6908.92	6454.57	6291.93	6353.71	6097.71	6324.61	6653.38	6766.26	6533.08	6763.9	6968.81	6932.7	6889.62	6543.24	6652.39	6563.5	6311.53
feature_3927	Cars2	357.454	370.551	429.254	387.259	345.281	315.03	344.761	319.544	303.975	339.126	299.334	285.472	302.528	340.048	435.355	395.517	374.412	360.376	393.111	428.635	381.387	501.608	417.908	389.897	398.366	415.653	297.31	386.203	287.488	408.946	289.513	389.367	363.176	346.914	385.138	321.257	427.505	328.36	403.166	442.579	353.412	415.857	485.979	526.497	384.373	389.285	421.913	424.647
feature_3949	Casq2	107.77	100.196	108.463	132.389	92.6634	71.8663	42.1783	68.9212	138.001	110.889	93.7415	73.5983	77.971	161.329	74.3034	91.4313	118.362	89.6319	140.33	133.434	128.351	168.744	95.5519	112.387	53.6881	108.566	86.3157	152.365	45.5672	84.8396	95.5094	86.9046	62.6851	83.9897	126.606	95.0567	95.5265	80.1508	99.4403	72.0031	68.1387	139.23	105.995	107.943	100.787	112.025	174.004	111.494
feature_3961	Catsperd	23.4746	44.9153	80.8873	55.8374	47.4348	48.239	36.6768	23.2721	32.6354	67.8252	36.2183	55.7563	32.228	33.8116	40.8146	20.5464	32.6101	39.7337	36.2443	41.127	40.339	6.93468	32.5506	21.6129	34.3604	68.2415	38.3625	60.3111	43.0817	36.2236	43.7751	40.8963	62.6851	22.8233	38.301	56.3299	29.32	24.1314	36.7497	32.6414	27.2555	32.0594	30.9987	45.1598	31.6194	30.8068	41.1622	33.9329
feature_3962	Catsperg1	90.6974	107.106	176.481	105.371	70.6006	123.059	87.1073	69.8163	52.2166	96.8931	68.1757	105.937	51.9807	56.9966	45.0007	50.3386	59.1812	61.9107	66.9125	67.6311	101.459	90.1508	76.6515	44.9548	86.9748	118.906	103.579	104.751	69.5935	43.8497	92.5247	95.4247	73.6301	69.3828	109.583	86.2552	73.7729	87.0455	46.4775	58.5625	71.7727	70.5308	61.9973	72.6963	86.9533	56.9458	67.3564	64.9574
feature_3982	Cbs	1473.57	1247.26	1378.76	919.516	1213.45	1115.4	1169.99	1303.24	1134.78	863.425	1311.32	1040.41	848.325	1030.77	998.387	1151.62	1054.39	1264.09	1341.04	1019.95	1301.85	1248.24	1334.58	1260.46	1073.76	1096	1054.01	1717.28	1002.48	1122.93	1229.68	1296.75	1024.85	1303.67	1467.14	1075.55	1175.64	982.494	1166.26	1228.85	1467.25	1296.12	1375.94	1445.11	1166.95	1304.15	1435.06	1328.23
feature_4008	Ccdc109b	665.826	968.271	527.606	449.401	520.68	714.725	740.87	575.537	394.422	395.108	557.123	570.945	451.192	239.579	580.823	367.78	340.594	255.035	439.578	261.385	514.628	434.573	329.706	426.206	463.866	613.14	575.438	467.676	542.664	435.637	593.949	294.794	623.866	451.901	519.191	425.115	396.293	324.051	323.181	542.424	392.479	501.959	358.984	297.394	317.182	380.884	586.562	403.317
feature_4014	Ccdc116	64.0217	97.6045	131.442	67.5452	86.0445	99.4314	82.5227	77.872	81.1223	58.1359	88.4153	108.167	87.3276	65.691	66.9778	48.2839	54.3501	59.1386	46.467	44.7827	92.9019	48.5427	65.1013	93.3677	98.7862	129.245	83.4385	85.7053	81.1925	98.1851	90.5349	93.7207	71.6401	76.6863	63.835	118.821	69.0439	81.8745	52.9628	76.8033	41.7917	53.1271	64.9972	51.7686	91.8938	70.9489	73.9049	66.8964
feature_4015	Ccdc117	1124.65	1184.21	1290.52	1152.77	1012.68	1157.74	1166.32	1097.37	1277.44	1064.75	1048.2	1127.39	1736.16	1685.75	1813.63	1545.09	1239.18	1175.38	1237.88	1187.2	1322.63	1384.62	1293.63	1359.88	1152.15	1050.51	1113.47	1139.56	1343.82	1333.6	1249.58	1213.26	1277.58	1152.12	1263.93	1474.26	1771.5	1590.95	1639.68	1742.48	1128.38	1269.55	1675.93	965.979	1164.98	1213.6	1432.26	1517.29
feature_4026	Ccdc130	292.366	369.688	479.809	329.621	375.066	334.72	355.764	325.809	339.408	377.883	334.487	460.547	309.805	238.613	330.703	284.567	338.178	303.085	367.089	276.922	327.602	399.9	370.657	331.974	371.522	419.789	344.304	358.692	391.049	402.273	350.201	347.619	377.106	331.394	353.22	310.695	330.087	302.505	363.173	325.454	323.431	346.242	316.986	385.511	392.278	317.403	367.653	328.665
feature_4029	Ccdc136	2952.47	3955.14	3578.34	3687.07	3748.45	3438.75	3808.88	3467.54	3829.53	5270.98	3408.78	3795.89	3742.61	3046.91	3493.31	3684.99	3624.55	3104.77	3120.72	3562.51	3433.7	3298.59	3365.32	3051.74	4064.19	4059.34	3519.76	3827.11	3405.94	3519.41	3500.02	3575.87	3625.79	3713.81	3703.49	3389.48	3220.47	3518.88	2934.57	3362.07	3395.12	3491.73	3105.87	3414.52	3393.16	3554.91	3200.36	3233.33
feature_4032	Ccdc14	246.483	263.446	182.916	219.747	190.842	256.946	198.971	147.688	234.975	258.382	199.201	223.025	214.16	145.873	193.608	203.409	183.583	179.264	247.204	157.197	231.032	184.925	196.354	212.671	210.458	257.457	203.321	198.921	225.351	220.202	225.84	187.441	253.725	185.325	223.423	221.799	181.595	199.946	142.675	221.77	168.984	183.197	160.993	178.436	215.407	160.569	198.327	183.238
feature_4033	Ccdc141	704.239	474.202	633.311	457.506	404.851	466.638	494.219	475.288	574.383	512.457	490.013	486.195	566.59	724.534	655.126	605.09	623.214	665.309	662.619	566.639	827.561	603.317	619.512	661.355	453.128	457.012	498.713	661.306	451.53	449.936	556.143	569.992	485.561	495.722	540.47	504.329	474.795	542.095	603.127	614.427	596.895	592.642	497.978	638.846	502.946	605.866	656.725	580.738
feature_4040	Ccdc150	34.1449	30.2315	34.9286	44.1295	22.0627	29.5341	25.6737	29.5377	17.7164	35.5275	17.0439	28.9933	25.9903	30.9134	7.32569	16.4371	18.1167	33.2654	13.0108	15.5369	26.8927	39.2965	11.5502	18.1548	24.6965	31.0189	39.3216	82.531	14.0844	47.6627	31.8365	23.8562	29.85	33.7785	38.301	27.2848	25.5368	25.8551	20.5366	6.72029	37.2491	25.6475	8.99961	33.0438	33.5956	13.0695	33.6782	23.2683
feature_4048	Ccdc159	237.947	293.677	381.457	231.455	193.049	265.807	239.316	206.764	216.326	216.395	241.811	292.163	159.061	192.243	230.236	182.863	196.868	168.175	187.727	241.278	361.829	251.96	291.906	210.077	272.736	371.193	289.637	207.386	236.121	258.332	209.922	267.53	200.99	220.929	274.491	251.724	195.782	212.012	178.344	256.331	160.807	185.945	155.993	250.031	279.634	211.913	285.329	294.732
feature_4051	Ccdc163	112.038	127.836	117.654	97.2651	69.4975	88.6022	77.0212	82.3474	101.636	83.974	68.1757	93.6706	53.0203	63.759	79.5361	64.721	68.8435	90.5559	109.662	88.6515	163.801	108.643	105.002	98.5548	86.9748	149.925	104.538	136.494	119.303	89.6058	87.5503	72.4205	98.5051	46.5595	67.0268	71.2926	74.7187	87.9073	52.9628	102.724	82.6749	105.338	87.9962	56.1744	91.8938	71.8824	69.2274	93.0732
feature_4103	Ccdc60	228.344	218.53	182.916	253.069	216.214	163.422	155.876	201.393	205.137	132.421	140.612	158.348	145.546	182.582	186.282	156.152	143.726	160.783	145.906	167.25	179.692	194.171	144.903	187.6	150.327	231.608	169.754	246.535	144.158	249.752	234.794	135.469	167.16	164.328	224.486	197.155	179.703	157.716	114.573	173.768	140.82	214.34	142.994	164.117	166.002	132.562	189.908	209.415
feature_4126	Ccdc81	574.061	554.532	412.709	556.573	587.971	709.802	639.092	545.104	680.681	517.84	547.536	704.76	447.034	615.37	408.146	398.599	415.476	493.437	440.507	443.258	554.967	742.01	259.355	427.071	289.916	491.132	433.497	567.136	310.685	493.785	588.975	344.211	407.951	513.981	520.255	439.197	489.928	461.082	358.85	384.017	406.106	479.06	327.986	398.728	345.837	340.741	435.01	433.372
feature_4129	Ccdc84	208.07	243.579	358.478	227.853	183.12	217.568	217.31	213.029	192.083	185.173	229.028	324.502	194.408	214.462	258.492	195.19	190.829	201.441	185.868	166.336	259.148	175.678	202.654	187.6	199.72	323.63	235.93	224.315	252.691	262.145	193.009	226.634	240.79	189.89	253.212	220.919	162.679	232.696	206.447	225.61	168.984	196.937	169.993	221.393	211.455	203.511	252.586	268.555
feature_4130	Ccdc85a	2232.22	1946.04	2433.05	2548.71	2136.77	2084.12	2074.99	2295.88	2377.72	2852.96	2248.73	2066.33	2619.83	3072.99	2757.6	2803.55	2474.74	2335.05	2147.7	2491.38	2092.74	2177.49	2184.04	2332.46	2870.17	2265.41	2604.82	2655.81	3036.43	2589.04	2429.52	3081.71	2134.28	2610.98	2915.13	3290.9	2782.56	3099.16	3397.18	3530.07	2700.11	2563.84	3095.87	3131.45	2971.23	3069.47	3125.52	3005.49
feature_4135	Ccdc88a	3881.85	3290.05	3252.04	3062.05	2846.09	3930	3370.59	2974.35	3719.5	3551.67	3467.37	3460.24	3745.73	4167.52	4515.77	3853.47	3293.62	3441.13	3525.92	3109.2	3377.47	3636.08	2713.25	3604.17	2627.5	3123.6	3308.77	2793.36	3439.91	3012.28	3443.31	2945.39	3692.45	2792.66	2870.45	3622.72	3127.78	3305.14	3874.93	4263.55	3089.86	2980.61	2717.88	3246	2882.3	3394.34	3701.79	3431.11
feature_4141	Ccdc91	2487.24	2693.19	2542.44	2887.33	2519.56	2278.06	2462.84	2316.47	2477.49	2555.82	2428.76	2145.5	2343.29	2335.9	2411.2	2348.45	2537.55	2494.91	2462.75	2552.62	2498.57	2748.44	2823.5	2713.72	2744.54	2613.86	2479.18	2545.76	2726.58	2551.86	2282.28	2531.31	2544.22	2344.41	2838.53	2377.3	2517.74	2497.6	2505.46	2513.39	2857.28	2982.44	2701.88	2656.72	2828.95	2773.54	2659.64	2564.36
feature_4156	Ccl17	10.6703	7.77381	6.43422	5.40362	12.1345	7.87575	12.8369	21.4819	9.3244	15.0723	4.26098	7.80588	6.23768	8.6944	2.09305	5.13659	3.62334	6.46828	4.6467	12.7951	8.55676	2.31156	4.20008	0.864516	11.8114	9.30566	6.71344	0	5.79946	5.71952	8.954	11.9281	7.96001	17.3457	9.57525	0.880155	8.51226	8.61836	4.32349	0.960042	5.45109	3.66394	5.99974	4.40583	1.97621	4.66769	6.54853	8.72562
feature_4169	Ccl28	73.6249	95.0132	107.543	93.6627	45.2285	134.872	92.6088	148.583	44.7571	152.876	79.8933	84.7496	48.8619	69.5552	58.6055	33.9015	24.1556	118.277	54.8311	39.2991	47.6734	4.62312	78.7515	34.5806	45.098	73.4114	43.1578	101.577	128.417	78.1668	80.586	138.025	130.345	45.6466	103.2	80.0941	67.1523	73.2561	55.1245	72.9632	59.0535	82.4386	52.9977	26.435	108.692	102.689	102.906	54.2927
feature_4192	Ccnf	198.467	265.173	181.996	166.612	175.398	173.267	218.227	192.442	174.366	108.736	129.96	214.104	229.755	118.824	201.98	169.507	108.7	109.961	142.189	92.3073	150.354	101.709	117.602	155.613	194.351	187.147	166.877	95.2281	137.53	146.801	160.177	100.537	160.195	138.766	127.67	139.945	124.846	95.6638	95.1168	153.607	126.284	86.1025	115.995	132.175	122.525	94.2874	132.842	125.067
feature_4194	Ccng2	874.963	836.116	831.853	906.007	732.482	931.308	1054.46	799.307	983.724	833.281	801.064	853.071	1074.96	1031.74	1055.95	976.979	977.094	906.483	853.134	901.138	1040.26	894.573	929.268	1024.45	872.969	680.348	794.104	897.26	806.954	899.871	902.365	910.795	763.166	922.061	904.329	866.953	963.777	861.836	993.322	965.802	874.9	936.136	1102.95	830.5	767.758	793.507	925.214	901.647
feature_4228	Cct3	6812.97	6700.16	6229.24	7836.15	6884.67	6860.77	6811.79	6150.99	6824.53	7224.99	6063.37	6376.29	8130.82	7449.17	7686.74	6793.65	7273.25	7140.06	7241.42	7797.68	7763.42	8178.29	7232.54	7572.3	7093.28	6614.26	6442.03	6306.22	7598.95	6839.59	6969.2	6563	7530.17	6819.6	7139.95	6150.52	7316.76	7559.17	6999.73	7247.35	6828.4	8262.17	8150.65	6291.53	7309.02	7074.35	6711.31	6502.52
feature_4229	Cct4	5803.57	5111.71	4873.46	6358.26	5683.35	5721.73	5620.71	5070.63	5789.52	6453.08	5001.32	5411.71	7576.71	6590.36	6584.75	5914.27	5908.46	6901.66	6215.42	6371.94	5910.28	6925.43	5928.42	6958.49	5359.15	5249.43	5165.51	4797.38	5820.17	5545.08	5512.68	5232.17	6338.16	5683.91	5201.49	5563.46	6096.67	6551.68	6017.22	5759.29	5362.06	6591.42	6455.72	5118.48	5682.6	5379.05	5490.48	5442.85
feature_4230	Cct5	7347.56	6376.25	6438.81	8210.8	7341.36	7027.14	6768.69	6211.86	6937.35	7799.89	6181.61	6473.31	8113.15	7962.14	7503.6	7183.01	7726.17	7700.95	7613.15	8099.28	7060.55	8427.94	7663.05	7742.61	7488.42	7200.52	7058.71	6837.38	7460.59	7173.23	6936.37	7331.51	7496.34	6848.81	6943.12	6799.2	7822.77	7977.16	6974.87	7310.72	7635.16	8931.76	8690.62	7307.08	7593.59	7772.64	6759.02	6918.44
feature_4233	Cct7	9785.71	9642.11	8746.86	10832.5	10073.8	9167.38	9438.76	8927.53	9052.13	9928.31	8697.72	8927.7	10685.2	9688.46	10189	9566.38	10281.8	10109.9	10218.1	11162.8	9946.62	11384.4	10460.3	10209.1	9991.36	9427.67	9353.74	9153.54	10792	9425.77	9686.24	9363.55	10383.8	9825.88	9578.44	8740.82	10595.9	10659.2	9874.85	9784.74	9613	11591.8	12243.5	10010.1	10475.9	9806.82	9333.53	9798.87
feature_4237	Cd101	6.40217	3.45503	6.43422	5.40362	1.10314	8.86022	3.66768	3.58032	14.919	24.7616	18.1092	6.69076	16.6338	17.3888	9.41875	6.16391	12.0778	2.77212	16.7281	12.7951	8.55676	0	2.10004	2.59355	6.44258	4.13585	8.63157	2.11618	1.65699	3.81301	5.96934	14.4841	7.96001	13.694	5.31958	3.52062	13.2413	12.9275	10.8087	7.68033	12.7192	9.15984	8.99961	3.30438	5.92863	6.53477	3.74202	1.93903
feature_4291	Cd38	981.666	562.305	705.926	755.606	671.809	781.669	634.508	840.481	891.413	552.291	867.109	849.726	678.868	1133.17	827.803	774.598	702.928	1055.25	892.166	690.934	677.206	846.031	717.164	939.729	498.226	474.589	737.52	757.592	738.189	574.812	724.279	814.518	857.691	752.256	727.719	771.016	694.222	712.739	985.756	676.829	876.717	843.621	1252.95	633.339	623.495	802.843	783.953	827.964
feature_4300	Cd46	51.2173	81.1931	73.5339	34.2229	31.9909	57.0992	66.0182	42.0688	54.0815	61.3656	49.0013	94.7857	41.5846	34.7776	33.4889	35.9561	39.8567	52.6703	45.5377	52.0942	68.4541	46.2312	49.351	58.7871	51.5406	92.0227	70.9707	100.519	61.3086	65.7745	39.7956	42.6003	44.7751	39.2561	64.8989	52.8093	43.5071	41.3681	44.3158	48.9621	49.9683	32.9754	35.9984	42.9569	63.2388	48.544	75.7759	42.6586
feature_4305	Cd53	257.154	119.198	134.199	216.145	162.161	169.329	170.547	197.813	210.731	190.556	122.503	150.542	166.338	207.7	127.676	127.387	192.037	276.288	210.96	185.528	193.138	196.482	200.554	219.587	178.245	142.687	185.099	227.489	200.496	158.24	176.095	151.657	137.31	186.238	141.501	101.218	142.817	170.644	143.756	110.405	208.05	170.373	202.991	155.306	164.026	195.109	144.068	201.659
feature_4333	Cda	444.951	590.809	370.427	285.491	443.46	427.26	478.632	319.544	257.353	271.301	332.356	391.409	313.963	224.122	297.214	313.332	326.101	243.947	336.421	277.836	409.502	231.156	529.21	374.335	371.522	440.468	278.128	228.547	395.192	381.301	305.431	263.27	381.086	286.661	246.829	352.062	325.357	224.077	199.961	330.254	285.274	366.394	249.989	230.205	366.587	335.14	274.103	296.671
feature_4338	Cdc14b	911.242	897.443	978.92	980.757	964.14	1059.29	856.402	975.638	877.426	917.255	840.478	1049.33	1002.19	785.394	837.222	887.603	851.485	729.992	897.742	829.851	932.687	769.749	735.014	862.787	836.461	922.295	884.256	812.613	937.027	844.583	958.078	861.378	864.656	807.032	775.595	925.043	700.843	802.37	832.272	826.596	847.645	730.955	816.965	811.775	850.759	925.136	845.697	759.129
feature_4344	Cdc25b	257.154	279.857	383.296	181.922	210.699	190.987	222.811	204.973	205.137	205.629	233.289	252.018	149.704	166.16	196.747	185.945	229.478	170.947	215.607	180.045	253.036	210.352	193.204	197.974	260.924	367.057	259.906	244.419	210.438	223.061	195.993	196.813	207.955	170.718	218.103	172.51	182.541	171.505	208.608	219.85	208.959	213.424	201.991	168.523	207.502	195.109	223.586	198.75
feature_4353	Cdc42bpa	13491.5	13032.4	11819.7	10727.1	10407	12770.5	12459.1	11082	12537.6	11734.8	12501.7	12111.4	13090.8	12486.1	14797.9	13953	14261.5	12209.3	14275.6	13075.6	13190.9	13016.4	12379.7	12787.9	12083.1	10829.7	11936.5	11321.6	11093.5	11550.6	11240.3	11092.3	11493.3	10650.3	10306.2	12663.7	11780	11492.6	13158.5	14451.5	12051.5	11424.2	10518.5	12341.8	10484.8	12455.3	11740.6	11793.2
feature_4368	Cdca2	14.9384	4.31878	22.9794	12.6084	1.10314	4.92235	6.41843	1.79016	16.7839	6.45954	1.06524	12.2664	16.6338	10.6265	18.8375	15.4098	12.0778	12.9366	1.85868	10.9672	14.6687	0	8.40016	21.6129	7.51634	13.4415	9.59063	6.34854	1.65699	3.81301	15.9182	1.70401	4.97501	6.39052	8.51133	9.6817	10.4039	24.1314	19.4557	9.60042	14.5362	30.2275	11.9995	9.91313	11.8573	12.136	9.35505	12.6037
feature_4386	Cdh19	373.46	250.489	406.275	226.952	277.99	529.644	314.503	338.34	455.031	360.658	470.838	489.54	594.659	611.506	561.985	445.856	477.073	686.562	597.566	516.372	473.066	399.9	416.858	450.413	233.007	270.898	331.836	395.726	419.218	305.994	439.741	433.671	526.356	426.339	462.804	396.95	578.834	363.695	559.892	533.783	459.709	414.941	432.981	392.119	359.67	330.473	407.88	356.781
feature_4390	Cdh23	45.8822	86.3756	57.908	40.5271	46.3317	51.1924	34.8429	51.9147	32.6354	237.926	52.197	28.9933	48.8619	43.472	80.5826	33.9015	70.0512	76.6953	54.8311	102.361	77.0108	76.2814	210.004	56.1935	132.073	75.4793	127.555	94.17	67.1081	61.0082	77.6014	69.8645	60.6951	63.9052	97.8803	67.7719	167.408	130.137	104.845	235.21	87.2175	115.414	73.9968	152.001	115.608	102.689	194.585	159
feature_4396	Cdh6	197.4	141.656	170.047	233.256	170.986	165.391	205.39	191.547	168.772	202.399	241.811	147.197	266.141	260.832	252.213	289.704	207.738	202.365	224.9	242.192	133.241	198.794	184.804	233.419	179.318	162.332	225.38	159.772	169.841	162.053	205.942	253.046	171.14	209.061	137.245	228.84	214.698	199.946	324.262	171.847	208.05	159.381	149.993	335.945	162.049	254.856	223.586	180.329
feature_4407	Cdk10	957.124	1225.67	1754.7	1197.8	1365.68	1016.96	1296.52	1320.24	1061.12	1368.35	1177.1	1261.21	926.296	938.995	1118.74	1113.61	1079.76	1129.18	1066.88	1082.1	1288.4	1084.12	1251.62	978.632	1253.08	1419.63	1205.54	1666.49	1193.03	1371.73	1182.92	1258.41	1044.75	1345.66	1418.2	1109	1204.01	1227.26	980.352	1095.41	1251.93	1199.02	1059.95	1320.65	1354.69	1177.19	1301.29	1204.13
feature_4409	Cdk12	1165.19	1261.95	1086.46	1028.49	1066.73	1280.79	1237.84	964.897	1422.9	1252.07	1203.73	1242.25	1742.39	1486.74	1887.94	1681.72	1304.4	961.002	1410.74	1225.58	1296.96	1165.03	1255.82	1308.01	1170.4	1040.17	1226.64	1020	1425.84	1345.99	1240.63	1155.32	1330.32	1115.6	1164.99	1506.83	1325.08	1328.95	1537	1737.68	1059.33	1101.01	1041.95	1002.33	963.403	1135.18	1244.22	1237.1
feature_4421	Cdk3-ps	23.4746	59.5992	91.9174	16.2109	29.7846	42.3322	36.6768	25.0623	34.5003	21.5318	27.6964	52.4109	30.1488	16.4228	27.2097	20.5464	20.5323	25.8731	16.7281	25.5901	62.3421	11.5578	31.5006	11.2387	37.5817	59.9698	46.9941	25.3942	17.3984	34.3171	27.8569	30.6722	29.85	20.0845	36.1732	43.1276	18.9161	24.9933	21.6175	22.081	9.99367	19.2357	26.9988	50.6671	47.4291	17.7372	35.5492	35.872
feature_4422	Cdk4	1201.47	1571.17	1625.1	1370.72	1426.35	1304.42	1344.2	1347.99	1276.51	1232.7	1366.71	1442.97	1249.62	1262.62	1355.25	1297.5	1199.33	1368.5	1366.13	1332.51	1501.1	1363.82	1379.73	1314.93	1285.29	1318.3	1248.7	1396.68	1299.08	1386.98	1430.65	1326.57	1363.15	1369.4	1338.41	1163.56	1305.21	1179.85	1172.75	1208.69	1245.57	1333.67	1485.94	1257.87	1404.1	1230.4	1452.84	1356.35
feature_4428	Cdk5rap3	1317.78	1579.81	1652.68	1356.31	1524.53	1446.19	1583.52	1487.62	1539.46	1593.35	1672.43	1644.81	1363.97	1311.89	1475.6	1406.4	1574.94	1332.47	1355.91	1239.29	1646.56	1333.77	1550.88	1360.75	1577.36	1732.92	1591.09	1810.39	1680.19	1629.11	1716.18	1685.27	1656.68	1680.71	1867.17	1579.88	1636.25	1504.77	1362.98	1430.46	1699.83	1596.56	1373.94	1551.96	1659.03	1415.24	1582.87	1461.06
feature_4439	Cdkn1a	260.355	257.399	200.38	452.103	206.286	135.857	229.23	220.19	326.354	136.727	181.092	225.255	357.627	318.795	352.68	291.758	333.347	203.289	286.237	207.463	330.046	238.091	307.656	263.677	223.343	179.91	174.55	227.489	272.575	181.118	266.63	195.109	244.77	161.589	247.893	254.365	464.391	218.045	311.291	216.009	340.693	229.912	321.986	251.133	210.467	213.78	264.748	453.732
feature_4454	Cdr2	529.246	601.174	715.117	827.654	707.11	612.34	778.464	691.002	785.114	685.788	844.739	718.141	1076	890.693	804.78	800.281	678.772	760.485	735.108	709.212	743.216	739.699	651.013	840.31	616.34	524.219	545.707	646.493	648.711	638.68	665.581	809.406	750.231	799.728	730.911	613.468	849.334	967.842	755.53	747.872	742.257	681.492	1022.96	702.731	772.699	635.74	592.175	665.086
feature_4461	Cdt1	70.4239	97.6045	67.0997	66.6446	80.5289	47.2545	57.7659	90.4031	66.2032	61.3656	46.8708	71.3681	69.6541	34.7776	47.0937	88.3493	64.0123	48.0501	64.1244	71.2868	56.2301	62.4121	89.2517	70.8903	100.934	78.5812	61.38	95.2281	56.3376	80.0733	77.6014	69.0125	46.7651	79.4251	65.9628	57.2101	69.0439	43.0918	61.6097	60.4826	66.3216	59.539	36.9984	62.7831	67.1912	75.6166	55.1948	69.8049
feature_4484	Cebpa	185.663	251.353	170.966	169.313	207.389	178.189	220.061	247.042	233.11	156.106	259.92	199.608	214.16	245.375	207.212	238.338	198.076	197.745	174.716	161.766	161.356	147.94	191.104	173.768	176.097	140.619	166.877	243.361	205.467	200.183	195.993	264.122	170.145	302.18	286.194	272.848	269.555	212.874	298.321	216.969	254.384	170.373	279.988	244.524	210.467	196.043	232.005	239.47
feature_4503	Celf5	5918.8	7629.56	7185.18	5681	5363.44	5933.4	6725.6	6259.3	5241.24	4786.52	6951.79	6272.58	4327.91	4609.97	6381.72	5983.1	5480.91	4979.65	5780.49	5407.74	6363.78	5013.77	6308.52	5181.04	7209.24	7075.41	6668.37	6397.21	6437.4	6321.02	6050.92	6224.76	5643.65	5944.1	5886.65	6574.76	5479.06	5792.4	6600.89	7339.52	5577.38	5265.08	5755.75	7018.49	6299.17	6525.43	7644.95	6649.89
feature_4557	Cep76	322.242	383.508	295.974	299	360.725	501.095	454.792	330.285	375.773	413.411	291.877	386.949	554.114	420.229	428.03	402.709	355.087	301.237	354.078	373.799	311.71	427.638	357.007	379.523	347.899	343.276	332.795	260.29	328.084	310.761	386.017	300.758	430.836	335.046	368.115	400.471	350.894	360.248	356.688	389.777	352.504	357.234	327.986	250.031	255.919	336.074	312.459	292.793
feature_4564	Cep95	428.945	452.608	595.625	373.75	389.407	464.669	430.952	341.026	458.76	399.415	321.704	447.166	347.231	401.875	415.471	375.998	393.736	458.324	359.655	394.819	470.622	490.05	397.958	443.497	340.383	525.253	513.099	456.037	401.82	401.32	405.915	356.139	412.926	314.961	395.777	451.52	411.426	396.445	300.483	456.98	316.163	403.033	320.986	370.09	375.48	393.02	447.171	480.878
feature_4574	Cers4	3306.72	3051.65	3408.3	3127.79	2871.46	3302.89	2824.11	2644.96	2734.85	3210.39	2973.1	3408.94	2442.05	2623.78	3391.8	2781.98	3120.9	2983.73	2911.62	2952	3698.96	3085.93	3087.06	3029.26	3268.53	3602.33	3211.9	2860.02	3136.68	2853.09	2833.45	2773.28	3278.53	2679.45	2859.81	2632.54	2534.76	3034.53	2435.21	2970.37	2468.44	3118.93	2460.89	2923.27	3041.39	3029.33	3127.39	2940.53
feature_4575	Cers5	1186.54	1268.86	1451.38	1540.93	1449.52	1524.94	1384.55	1374.84	1334.32	1440.48	1295.34	1507.65	1340.06	1185.34	1455.72	1342.7	1251.26	1266.86	1256.47	1221.93	1317.74	1356.89	1210.67	1373.72	1365.83	1605.74	1321.59	1123.69	1413.41	1272.59	1392.85	1266.08	1294.5	1243.41	1333.09	1261.26	1174.69	1350.5	1218.14	1125.17	1238.31	1221.92	1301.94	1214.91	1304.3	1267.74	1341.51	1336.96
feature_4580	Ces1d	82.1612	51.8254	41.3628	108.072	49.6411	41.3477	37.5937	56.3901	69.933	29.0679	78.8281	51.2958	65.4957	89.8422	53.3729	46.2293	109.908	105.341	98.51	85.9097	80.678	83.2161	26.2505	66.5677	30.0654	44.4604	53.7075	67.7178	22.3694	51.4757	56.7087	79.2366	79.6001	78.5121	74.4742	66.8918	123.901	153.407	59.448	39.3617	55.4194	125.49	64.9972	44.0583	82.0128	57.8794	27.1296	81.4391
feature_4632	Cgn	856.824	800.702	1142.53	912.311	1060.11	839.752	730.784	815.418	688.141	793.447	849	855.302	681.987	667.537	663.498	837.264	893.757	817.775	690.499	867.323	778.665	670.352	825.316	763.368	1291.74	1239.72	994.549	1015.77	871.576	945.627	758.106	1028.37	745.256	837.158	906.457	934.725	736.783	976.461	737.155	943.721	853.096	782.25	626.973	1122.39	1047.39	1091.31	758.695	925.885
feature_4641	Chaf1a	314.773	234.942	253.692	235.057	231.658	185.08	195.304	242.567	284.394	249.769	192.809	220.795	176.734	226.054	119.304	160.262	172.713	211.605	188.656	171.819	212.697	226.533	147.003	152.155	198.646	257.457	210.994	401.016	187.24	244.986	278.569	227.486	199	207.236	306.408	214.758	186.324	177.538	181.587	224.65	221.678	246.4	171.993	290.785	214.419	174.572	274.103	224.927
feature_4652	Chchd7	642.351	748.877	851.155	690.762	655.262	865.348	797.719	787.671	755.276	865.578	722.236	864.223	619.61	682.994	799.547	638.992	693.266	716.131	649.609	633.356	874.012	559.397	673.063	667.406	755.929	887.14	753.824	704.688	822.695	637.727	727.264	577.66	794.011	775.992	790.49	690.922	652.607	623.97	684.192	734.432	591.443	643.021	681.97	599.193	727.246	603.999	754.953	728.104
feature_4674	Chid1	2103.11	2426.29	2149.95	2541.5	2700.47	2274.12	2382.15	2511.6	2090.53	2301.75	2335.02	2581.52	2117.69	1891.52	2129.68	1986.83	2065.3	2124.37	2128.19	2088.34	2139.19	2020.3	2311.09	2271.95	2202.29	2467.04	2296	2597.61	2207.94	2396.48	2507.12	2426.51	2490.49	2551.64	2309.76	2162.54	1968.22	2193.37	1853.7	1733.84	2166.81	1959.29	1882.92	2088.37	2498.92	2255.43	2132.95	1959.39
feature_4700	Chordc1	3714.32	2389.15	2823.7	3204.35	2154.42	3244.81	2900.21	2243.07	3420.19	2938.01	2320.1	2554.75	4534.8	4731.69	5207.52	3993.18	3554.5	4017.73	3766.61	3586.27	3934.89	4248.65	3461.92	3940.46	3057	2752.41	2929.94	2399.75	3574.95	3103.79	2525.03	2558.57	3930.26	2466.74	2794.91	3140.39	4213.57	3935.15	4199.19	4475.71	2920.88	3546.69	4276.81	2785.59	2864.52	2813.68	3087.17	3762.68
feature_4705	Chpt1	3114.65	2171.48	2524.05	2501.87	2396.01	2611.8	2148.34	2579.62	2974.48	2325.43	2682.29	2235.83	2581.36	3288.42	2821.44	2657.67	2590.69	3039.17	2804.75	2275.69	2307.88	2556.58	2083.24	2826.1	1622.46	1902.49	2167.48	2305.58	2214.57	2044.73	2418.58	2473.37	2469.59	2370.88	2265.08	2445.07	2277.5	2448.48	2855.67	2529.71	2548.39	2479.57	2623.89	2176.48	2145.18	2637.25	2601.64	2554.67
feature_4707	Chrd	176.06	297.132	435.689	234.157	232.762	214.614	316.337	247.042	192.083	149.646	251.398	283.242	179.853	168.092	257.446	250.666	280.205	194.972	172.857	191.926	234.7	154.874	346.507	161.665	322.129	392.906	297.31	468.734	281.688	258.332	212.906	297.35	151.24	258.36	275.554	271.088	243.072	210.288	246.439	290.893	246.208	221.668	222.99	273.162	289.515	201.644	252.586	253.043
feature_4713	Chrm4	162.188	150.294	155.34	196.331	164.367	101.4	303.5	156.639	182.758	118.425	168.309	150.542	163.219	124.62	160.119	127.387	130.44	117.353	98.51	115.156	184.581	145.628	165.903	127.948	231.933	160.264	202.362	195.747	171.498	187.791	165.152	195.961	152.235	160.676	197.889	185.713	171.191	148.236	119.977	177.608	167.167	183.197	130.994	134.378	190.704	216.581	211.424	131.854
feature_4718	Chrna3	422.543	995.911	495.435	419.681	591.28	847.628	838.981	520.042	274.137	517.84	583.754	762.746	339.954	170.024	321.284	256.829	155.804	126.593	308.541	191.926	292.152	177.99	255.155	223.91	161.064	235.744	127.555	124.855	167.356	152.521	235.789	67.3085	288.55	167.067	84.0494	76.5735	112.551	132.723	94.0359	55.6824	92.6686	120.91	94.9959	48.4642	166.002	83.0849	62.6788	72.7135
feature_4721	Chrna6	8.53622	5.18254	4.59587	74.75	4.41254	0	7.33535	5.37048	11.1893	4.30636	1.06524	0	1.03961	1.93209	0	7.19122	9.66224	6.46828	8.36406	3.65573	3.66718	4.62312	5.2501	8.64516	4.29505	12.4076	18.2222	6.34854	5.79946	12.3923	0.994889	7.66806	0	8.21639	6.3835	1.76031	1.89161	10.342	3.24262	0	2.72555	4.57992	11.9995	17.6233	0	9.33538	11.2261	8.72562
feature_4738	Chst2	2351.73	2276.86	2727.19	2098.4	2849.4	2052.62	2394.07	2993.15	2445.79	2754.99	2984.82	2269.28	2910.92	3255.57	2621.55	3294.61	2663.15	2874.69	2413.5	2748.2	2272.43	2473.37	2988.36	2545.14	2588.84	2162.02	2027.46	2667.44	2157.4	2354.54	2302.17	2997.36	2263.63	2934.16	2303.38	2334.17	3087.11	2297.66	3159.39	2391.46	2854.56	2653.61	3584.84	3109.42	2545.36	2612.97	2195.63	2716.57
feature_4739	Chst3	202.735	218.53	237.147	149.5	187.533	171.298	149.458	207.659	130.542	116.272	201.331	151.657	122.674	134.28	145.467	175.671	131.648	156.163	206.313	153.541	125.907	157.186	204.754	165.123	156.769	165.434	202.362	170.352	173.155	143.941	143.264	138.025	141.29	119.594	143.629	183.072	116.334	158.578	198.881	121.925	190.788	138.314	213.991	204.871	165.014	211.913	170.262	194.872
feature_4748	Chtf8	2449.9	2540.31	2253.81	2287.53	2060.66	2204.23	2588.46	2225.17	2193.1	1920.64	2393.6	2504.57	2432.7	2303.05	2703.18	2600.14	2533.92	2226.01	2558.47	2483.16	2442.34	2154.37	2620.85	2432.75	2759.57	2373.98	2396.7	2157.45	2537.68	2504.2	2470.31	2440.15	2478.55	2472.22	2418.28	2546.29	2685.15	2496.74	2526	2926.21	2641.96	2675.59	2774.88	2516.83	2380.35	2544.83	2614.74	2768.93
feature_4750	Chuk	1219.61	1029.6	1236.29	1146.47	937.665	1348.72	1038.87	1020.39	1169.28	936.633	1053.53	1280.16	950.207	1080.04	1097.81	1039.65	925.159	959.154	979.524	951.404	1376.42	1070.25	854.717	950.968	779.552	1265.57	1089.5	1086.66	1076.21	983.758	1046.62	972.139	1212.91	871.85	1150.09	1028.9	928.782	1023	839.838	946.601	818.572	843.621	812.965	841.514	863.604	882.194	1031.86	1139.18
feature_4756	Cib2	1072.36	1036.51	1216.07	1406.74	1257.57	1074.06	1233.26	1099.16	961.346	1269.3	950.198	1048.22	1252.73	1099.36	979.55	1155.73	1324.93	1253	1122.64	1359.02	1100.15	1301.41	1263.17	1214.65	1360.46	1081.53	1058.81	1181.89	1072.9	1087.66	1100.35	1197.92	1038.78	1175.86	1153.29	1064.99	1153.88	1311.72	1108.98	979.242	1159.27	1601.14	1415.94	1303.03	1358.65	1137.05	896.214	1216.74
feature_4764	Cilp	10.6703	6.04629	15.626	16.2109	22.0627	8.86022	11.9199	11.636	3.72976	18.302	9.5872	8.92101	0	10.6265	10.4653	4.10927	9.66224	11.0885	11.1521	2.7418	12.2239	23.1156	6.30012	15.5613	11.8114	15.5094	19.1813	56.0788	10.7704	20.9716	22.8825	4.26003	3.98001	8.21639	8.51133	29.0451	4.72903	12.9275	4.32349	6.72029	6.35961	12.8238	9.99957	15.4204	23.7145	9.33538	1.87101	11.6342
feature_4767	Cipc	2760.4	2802.89	2806.24	2882.83	3009.35	3213.31	3211.05	2969.88	2972.62	3207.16	2917.7	3074.4	3178.1	2976.38	3165.75	2992.58	2931.28	3073.36	3076.11	2771.96	2941.08	2988.85	3042.96	2814	3124.65	3089.48	3072.84	3055.76	3304.04	3086.63	3132.91	2792.88	3083.51	3076.58	3166.22	3297.94	2957.54	3012.98	3313.96	2966.53	2974.48	2875.27	2720.88	3219.56	2965.31	2875.3	2980.52	2958.95
feature_4769	Cirbp	3117.86	6001.38	4397.33	3512.35	4971.83	4139.69	4026.19	5369.59	3902.26	4517.37	5794.93	5063.79	3705.18	2639.23	3407.49	3308.99	3658.37	3024.38	3626.28	3061.68	3557.17	3097.49	3454.57	3281.7	4473.3	5150.17	4790.52	5421.65	5116.78	4367.81	4955.54	4052.99	4637.7	5025.69	5318.52	4289.88	3492.86	3642.98	2822.16	3082.69	3574.1	3578.75	2456.89	3948.73	4657.93	3753.76	5031.15	3810.19
feature_4777	Cited2	1534.39	2533.4	2009.31	1717.45	1884.15	1822.25	1967.71	2047.94	1998.22	1982	2195.47	2254.78	2584.48	1845.15	2975.28	2535.42	1884.14	1505.26	1725.78	1964.04	2080.51	2265.33	2315.29	1952.94	1868.35	1661.58	1652.47	1753.26	1754.75	1842.64	1907.2	1943.43	2202.93	2136.26	2024.63	2133.5	2239.67	2096.85	2139.05	2594.03	2076.87	2281.72	2198.9	1796.48	1950.52	1870.81	2254.57	2005.92
feature_4794	Clasrp	1070.23	1838.07	2430.3	1051.9	1139.54	1383.18	1405.64	1286.23	1082.56	1318.82	1517.97	1655.96	911.741	1110.95	1283.04	1129.02	1053.18	1164.29	1028.78	966.027	1481.54	1061.01	1373.43	950.103	1500.05	2238.53	1596.84	1978.63	1390.21	1334.55	1265.5	1694.64	1315.39	1307.32	1767.17	1446.97	1279.68	1409.1	1261.38	1503.43	1102.94	1173.38	1161.95	1695.14	1525.64	1312.55	1495.87	1411.61
feature_4806	Clcn1	57.6195	71.6918	125.008	36.0241	26.4752	73.8352	66.0182	60.8655	45.6896	53.8295	58.5885	110.397	36.3865	33.8116	38.7215	36.9834	57.9734	48.0501	28.8095	40.2131	79.4556	25.4271	67.2013	36.3097	59.057	92.0227	95.9063	102.635	42.2532	71.494	46.7598	51.1204	33.83	49.2983	41.4928	61.6108	50.1278	65.4996	41.0732	59.5226	30.8895	37.5553	33.9985	47.3627	79.0485	61.6135	59.8723	63.9878
feature_4807	Clcn2	763.992	945.813	1378.76	711.476	873.683	852.55	949.928	960.422	773.925	753.613	1092.94	1110.67	690.304	696.518	835.129	974.925	776.602	707.815	640.315	730.233	900.904	663.417	812.716	700.258	1039.4	1200.43	983.999	1303.57	963.539	980.898	930.222	1033.48	726.351	931.19	973.484	910.96	975.127	797.199	858.213	936.041	920.326	738.283	812.965	1121.28	972.296	906.466	1025.31	920.068
feature_4818	Cldn12	2430.69	2260.45	1936.7	2375.79	2362.92	2737.81	2367.48	2309.31	2387.05	2453.55	2182.69	2671.84	2734.18	2175.53	2757.6	2266.26	2268.21	1995.93	2270.38	2198.92	2307.88	2330.05	1992.94	2445.72	2328.99	2314.01	2356.42	2075.97	2699.24	2349.77	2401.66	1963.02	2639.74	2202.9	2555.53	2419.55	2292.64	2308	2002.86	2424.11	2048.7	2080.2	1902.92	1723.78	2115.53	2375.85	2375.25	2264.78
feature_4829	Cldn23	23.4746	68.2368	14.7068	42.3283	24.269	33.472	22.923	31.3278	14.919	13.9957	42.6098	35.684	6.23768	20.2869	12.5583	13.3551	3.62334	14.7846	10.2227	11.8811	8.55676	25.4271	21.0004	20.7484	48.3193	36.1887	33.5672	26.4522	16.5699	30.5041	18.9029	28.1162	41.7901	29.2138	15.9588	10.5619	15.1329	18.9604	14.0513	13.4406	10.9022	19.2357	35.9984	18.7248	19.7621	39.2086	29.0007	22.2988
feature_4846	Cldn9	4.26811	1.72751	4.59587	18.0121	1.10314	3.93788	1.83384	2.68524	2.79732	0	0	3.34538	0	6.76231	0	2.05464	1.20778	9.2404	7.43472	4.56967	9.77915	2.31156	3.15006	2.59355	10.7376	3.10189	6.71344	2.11618	0	2.85976	2.98467	2.55602	4.97501	2.7388	5.31958	7.92139	3.78323	5.17102	8.64698	0	13.6277	1.83197	3.99983	3.30438	6.91674	9.33538	6.54853	11.6342
feature_4878	Clec5a	77.8931	34.5503	47.7971	60.3404	62.8787	72.8507	73.3535	50.1245	83.9196	55.9827	56.458	46.8353	59.258	85.978	68.0243	34.9288	88.1679	89.6319	86.4286	98.7048	123.462	53.1659	68.2513	83.8581	38.6555	58.9359	66.1754	42.3236	63.7941	61.9615	49.7445	29.8202	49.7501	51.1242	23.4062	39.607	40.6697	66.3614	69.1759	61.4427	84.4919	106.254	56.9975	42.9569	59.2863	70.0154	58.0013	50.4147
feature_4943	Cml3	85.3622	127.836	123.169	98.1657	89.3539	172.282	143.039	96.6687	169.704	73.2081	151.265	210.759	158.021	109.163	188.375	169.507	108.7	136.758	92.934	97.7909	110.015	85.5277	102.902	79.5355	80.5322	59.9698	92.0701	93.1119	122.617	122.97	118.392	157.621	150.245	148.808	136.181	137.304	129.576	164.611	156.727	169.927	88.126	78.7746	109.995	140.987	95.8463	75.6166	89.8085	93.0732
feature_4944	Cml5	74.692	74.283	50.5546	99.9669	91.5602	80.7265	59.5997	81.4523	97.9062	44.1402	145.939	97.016	85.2483	122.688	92.0944	68.8303	56.7657	107.189	82.7112	40.2131	56.2301	83.2161	65.1013	68.2968	40.803	38.2566	56.5847	73.0082	74.5645	101.998	81.5809	85.2006	80.5951	77.5992	77.6659	67.7719	97.4181	88.7692	65.9332	82.5636	89.0345	77.8586	73.9968	107.943	83.0009	66.2812	51.4528	88.2257
feature_4979	Cnn1	30.9438	19.0026	16.5451	24.3163	20.9596	19.6894	16.5045	11.636	31.703	10.7659	30.8921	26.763	10.3961	22.219	10.4653	11.3005	7.24668	9.2404	9.2934	3.65573	19.5583	16.1809	3.15006	1.72903	2.14753	14.4755	14.3859	9.52281	19.8839	27.6444	23.8773	17.0401	28.855	31.0397	39.3649	15.8428	18.9161	18.9604	6.48524	9.60042	4.54258	16.4877	8.99961	0	9.88106	5.60123	9.35505	15.5122
feature_4980	Cnn2	182.462	93.2857	189.35	99.0663	120.242	107.307	134.787	139.633	171.569	88.2804	92.6763	133.815	107.08	122.688	84.7687	108.896	119.57	120.125	131.966	107.844	160.134	138.694	90.3018	133.135	106.303	126.143	127.555	187.282	118.475	138.222	125.356	124.393	139.3	121.42	137.245	101.218	114.443	74.9798	103.764	80.6435	131.735	147.473	119.995	129.972	133.394	170.837	130.971	111.494
feature_5005	Cnst	1822.48	2017.73	2052.52	1781.39	1932.69	2046.71	2041.06	1873.4	1902.18	2101.5	1890.81	1952.59	2341.21	1990.05	2558.76	2319.68	2148.64	1874.88	2099.38	2178.82	2018.17	1927.84	2016.04	2313.45	2405.23	2179.59	2267.23	2018.84	2574.13	2256.35	2215.62	2028.63	2092.49	2080.57	2270.4	2662.47	2516.79	2444.17	2516.27	2878.2	2111.39	2180.04	2056.91	2287.73	2348.73	2466.41	2257.37	2289.02
feature_5031	Cobl	3418.76	4000.92	2924.81	2671.19	3327.06	3779.38	4394.79	3174.85	3674.75	3263.14	3408.78	4089.17	4752.08	3174.42	5066.24	4318.84	3404.73	2844.2	3565.88	3463.81	3173.33	3448.85	3348.52	3393.23	3524.09	3471.01	3464.14	2721.41	3879.01	3752.96	3721.88	2876.37	4219.8	3247.3	3327.93	3775.86	3560.02	3376.68	3414.48	4328.83	3062.61	3171.14	2795.88	3313.19	2962.34	3483.03	3532.47	3072.39
feature_5039	Cog6	1643.22	1495.16	1704.15	1837.23	1587.41	1703.13	1939.28	1610.25	2028.06	1902.33	1600	1789.78	1991.9	1822.93	1832.47	1801.92	1760.94	1747.36	1836.38	1719.11	1883.71	1791.46	1590.78	1747.19	1606.35	1618.15	1571.9	1538.46	1646.22	1761.61	1734.09	1608.59	1852.69	1550.16	1707.59	1708.38	1617.33	1626.29	1744.53	1585.99	1606.26	1754.11	1685.93	1468.24	1467.34	1632.76	1504.29	1610.36
feature_5049	Col15a1	396.934	466.428	750.965	144.997	212.905	443.011	346.595	323.124	227.515	342.356	272.703	374.682	287.973	242.477	365.238	279.43	312.815	239.326	230.476	238.537	490.18	219.598	436.808	281.832	523.996	839.578	382.666	520.58	326.427	401.32	349.206	188.293	314.42	218.191	368.115	312.455	313.062	309.399	266.976	510.742	271.646	282.123	197.991	433.975	285.563	314.602	323.685	316.061
feature_5050	Col16a1	357.454	452.608	1037.75	348.533	447.873	478.452	574.908	485.134	330.084	361.734	573.102	595.477	278.617	384.486	344.308	371.889	359.918	449.083	294.601	330.844	517.073	249.648	423.158	274.052	483.193	867.495	483.368	771.348	453.187	476.627	417.854	653.489	387.056	466.508	391.521	422.474	484.253	387.826	355.607	391.697	409.74	325.174	394.983	633.339	533.577	494.775	420.042	521.598
feature_5056	Col20a1	44.8152	47.5066	103.867	50.4338	31.9909	75.8041	47.6798	40.2786	27.9732	51.6763	47.936	73.5983	28.0696	46.3701	45.0007	32.8742	27.7789	36.9616	50.1844	24.6762	68.4541	25.4271	53.551	44.9548	49.3931	71.3434	44.1169	51.8464	57.9946	65.7745	64.6678	72.4205	32.835	42.9078	48.9402	42.2474	48.2361	50.8484	43.2349	47.042	40.8832	53.1271	55.9976	72.6963	51.3815	50.4111	58.9368	55.2622
feature_5064	Col2a1	93.8985	187.435	231.632	143.196	88.2508	112.229	102.695	110.095	91.3791	47.37	158.721	120.434	39.5053	55.0645	102.56	81.1581	54.3501	80.3915	75.2765	52.0942	135.686	106.332	124.952	65.7032	98.7862	139.585	115.088	259.232	90.3059	102.951	95.5094	208.742	113.43	82.1639	102.136	92.4163	71.8813	87.9073	98.3594	99.8443	85.4004	78.7746	139.994	167.422	116.596	114.825	127.229	141.549
feature_5066	Col4a1	991.269	1111.65	1306.15	808.741	782.123	862.395	838.981	854.802	704.925	659.95	823.434	904.367	529.163	777.666	894.781	868.084	785.057	764.181	762.059	690.934	1166.16	795.176	905.118	738.297	897.666	1242.82	962.899	1362.82	636.284	913.217	800.886	966.175	754.211	778.731	940.502	999.856	935.403	1093.67	772.824	999.403	926.686	774.006	750.967	1195.08	970.32	860.722	1116.99	1090.7
feature_5067	Col4a2	1418.08	2255.27	2710.64	1321.18	1263.09	1397.95	1458.82	1550.28	1167.41	1039.99	1734.22	1751.86	1043.77	1044.29	1404.44	1523.51	1396.19	1117.16	1204.42	1372.73	1908.16	1026.33	1661.13	1114.36	2174.37	2534.24	1936.35	2751.03	1360.39	1710.14	1494.32	1864.19	1374.1	1523.68	1611.83	1714.54	1634.35	1701.27	1537	2060.25	1548.11	1246.65	1230.95	2443.04	1847.76	1783.99	2024.43	1971.02
feature_5076	Col6a1	116.306	171.888	269.318	237.759	132.376	157.515	258.571	141.423	133.339	124.884	191.744	215.219	101.882	111.095	85.8152	90.404	163.05	134.91	85.4993	124.295	217.586	50.8543	175.353	99.4194	108.45	253.321	187.017	285.684	98.5909	170.632	114.412	213.002	133.33	135.114	124.478	106.499	141.871	66.3614	119.977	122.885	145.362	87.9345	159.993	212.582	104.739	143.765	156.229	158.031
feature_5081	Col6a6	30.9438	35.414	14.7068	29.7199	30.8878	23.6273	19.2553	10.741	9.3244	10.7659	17.0439	17.842	1.03961	0	4.18611	12.3278	13.2856	15.7087	28.8095	21.0205	12.2239	6.93468	19.9504	7.78064	13.9589	28.951	18.2222	25.3942	7.45645	11.439	17.908	13.6321	4.97501	19.1716	12.767	18.4833	1.89161	15.5131	11.8896	16.3207	1.81703	8.24386	3.99983	13.2175	4.94053	13.0695	3.74202	16.4817
feature_5082	Col7a1	55.4855	166.705	217.844	56.738	59.5693	80.7265	77.9381	72.5015	34.5003	47.37	113.981	100.361	31.1884	43.472	52.3264	49.3113	51.9345	53.5943	53.9017	48.4385	125.907	50.8543	66.1513	38.9032	80.5322	165.434	100.702	89.9376	72.079	88.6526	64.6678	76.6806	66.6651	66.644	82.9855	60.7307	68.0981	42.23	58.3671	64.3228	32.7066	32.0594	62.9973	84.8123	77.0722	52.2781	88.873	93.0732
feature_5083	Col8a1	69.3568	63.0542	72.6148	86.4579	86.0445	73.8352	63.2674	88.613	116.555	113.042	100.133	51.2958	73.8126	142.975	80.5826	80.1308	99.0379	122.897	74.3472	73.1147	53.7853	57.789	69.3013	82.129	76.2372	54.8	64.2572	40.2074	98.5909	100.092	97.4992	120.985	72.6351	127.81	54.2598	90.656	96.4723	106.868	151.322	58.5625	125.375	88.8504	128.994	55.0729	64.2269	119.493	88.873	99.8598
feature_5085	Col9a1	19.2065	54.4167	62.5038	27.9187	27.5784	38.3943	32.0922	48.3344	16.7839	35.5275	20.2396	39.0294	29.1092	14.4907	34.5354	20.5464	30.1945	30.4933	37.1736	32.9016	57.4525	27.7387	30.4506	42.3613	20.4015	59.9698	42.1988	75.1244	19.0554	21.9248	26.862	53.6764	29.85	37.4302	45.7484	44.8879	17.9703	28.4406	24.8601	31.6814	36.3406	66.8668	15.9993	40.754	40.5123	31.7403	42.0977	48.4756
feature_5093	Colq	3.20108	2.59127	5.51504	6.30422	7.72195	2.95341	9.16919	2.68524	7.45952	3.22977	3.19573	2.23025	2.07923	0	0	0	0	7.39232	4.6467	0	4.88958	0	2.10004	6.91613	3.22129	7.23774	0	0	7.45645	1.90651	0.994889	0	0.995001	1.82586	3.19175	3.52062	0	0.861836	0	0	1.81703	0	0	0	0	0	3.74202	0.969513
feature_5100	Commd6	1391.4	1007.14	1256.51	1361.71	1242.13	1342.82	1257.1	1313.98	1580.49	1431.86	1198.4	1217.72	1380.61	1532.15	1399.21	1101.28	1475.91	1559.78	1534.34	1343.48	1472.98	1738.29	1288.38	1649.5	1138.19	1064.98	1171.02	1018.94	1258.48	1324.07	1290.37	1161.28	1358.18	1269.89	1202.23	1096.67	1125.51	1201.4	1241.92	1207.73	1362.77	1465.57	1465.94	1192.88	1308.25	1250.94	1339.64	1386.4
feature_5125	Coq10b	1367.93	1210.99	853.913	1183.39	1033.64	1575.15	1491.83	1079.47	956.683	1147.64	896.936	988.002	1090.56	1055.89	875.943	806.445	655.824	645.904	735.108	576.692	717.545	910.754	743.414	965.664	1068.39	1058.78	1074.15	736.431	1173.98	1004.73	1089.4	769.362	1104.45	953.101	967.1	848.469	822.852	865.284	710.133	664.349	663.216	762.099	811.965	536.41	821.116	761.767	896.214	773.671
feature_5139	Coro6	184.596	247.898	549.666	194.53	146.717	170.313	258.571	189.757	272.272	297.139	196.005	333.423	175.695	184.515	166.398	157.18	171.505	218.073	172.857	232.139	321.49	141.005	247.805	142.645	345.752	565.578	252.234	365.041	241.092	264.051	172.116	290.534	150.245	220.929	186.185	188.353	229.831	300.781	159.969	174.728	173.526	155.717	107.995	295.191	272.717	165.236	196.456	222.988
feature_5179	Cpd	5041.71	3696.88	3499.3	3590.7	3574.16	4132.8	3720.86	4001.91	4112.06	3986.61	4219.43	3821.54	4481.78	4905.58	4365.07	4345.55	4130.61	4640.53	4871.6	4498.38	4189.14	4787.24	3691.87	4409.9	3744.21	3760.52	4428.95	4386.84	3650.35	4164.76	4312.85	3615.91	3921.3	3885.44	3666.26	4729.07	4183.3	4327.28	4352.67	4959.58	4617.98	4067.88	3950.83	4077.6	3330.9	4317.61	4268.71	4162.12
feature_5181	Cpeb1	1818.22	1630.77	2200.5	1875.06	1942.62	2236.71	1961.29	2052.42	1914.3	2241.46	1720.37	2019.49	1916.01	2141.72	1663.98	1646.79	1802.01	1874.88	1645.86	1867.17	1878.82	1738.29	1626.48	1793.87	1958.54	2478.41	2186.66	1938.42	1947.79	2057.12	1868.4	1941.72	1900.45	1985.63	1882.07	2060.44	1902.96	1875.36	1770.47	1699.27	1730.72	1755.03	1796.92	1499.09	1875.42	1685.04	1687.65	1684.04
feature_5190	Cplx3	55.4855	44.9153	56.9888	45.0301	124.654	75.8041	136.621	85.9277	155.717	65.672	34.0878	79.1739	42.6242	31.8795	24.0701	29.7922	48.3112	51.7462	34.3856	40.2131	58.6749	41.6081	64.0512	55.329	81.606	63.0717	71.9297	69.8339	106.876	86.7461	72.6269	66.4565	64.6751	42.9078	48.9402	39.607	45.3987	44.8155	22.6983	24.9611	31.798	43.0512	42.9981	23.1306	70.1555	34.5409	63.6143	28.1159
feature_5195	Cpne1	1779.8	1988.37	2002.88	1983.13	1923.87	1976.81	1916.36	2042.57	1875.14	1860.35	1981.35	1984.92	1789.18	1853.84	1522.7	1818.35	1857.57	1873.03	1770.39	1895.5	1739.47	1740.6	1923.64	1811.16	1966.06	1935.58	1920.04	1963.81	1977.62	1874.1	1761.95	2074.64	1939.26	1962.8	1910.79	1847.45	1785.68	2114.95	1833.16	1764.56	1917.88	1768.76	1835.92	1840.54	2115.53	1973.5	1860.72	1788.75
feature_5207	Cps1	30.9438	92.4219	11.0301	40.5271	20.9596	30.5185	36.6768	21.4819	29.8381	10.7659	34.0878	42.3748	30.1488	12.5586	53.3729	49.3113	51.9345	14.7846	67.8418	59.4057	64.7869	34.6734	59.8512	63.1097	22.549	23.7811	23.0175	11.639	34.7968	19.0651	14.9233	6.81605	13.93	10.9552	23.4062	22.0039	15.1329	14.6512	27.0218	29.7613	16.3533	43.9672	17.9992	27.5365	35.5718	19.6043	51.4528	27.1464
feature_5214	Cpsf6	3737.8	3556.95	3740.12	3495.24	3027	4415.34	3794.21	3665.36	3892.94	3868.19	3498.26	3814.85	4076.33	4434.15	4851.7	4165.77	4055.72	3834.77	3970.14	3941.79	4323.61	3992.06	3350.62	4268.12	3541.27	3937.33	3852.56	3482.17	3577.44	3706.25	3474.15	3362.02	4172.04	3282.9	3727.96	3857.72	3867.4	4069.59	4200.27	4604.36	3407.84	3532.03	3750.84	3614.99	3956.38	3695.88	4287.42	4077.77
feature_5235	Crb1	436.414	513.071	375.942	461.109	400.438	446.949	381.438	302.537	323.557	320.824	272.703	334.538	412.727	322.659	428.03	442.774	399.775	259.655	270.438	329.93	278.706	365.226	352.807	429.665	537.955	497.336	508.303	439.107	473.07	467.094	380.048	389.367	365.166	334.133	534.086	511.37	321.574	467.977	383.71	418.578	337.968	387.461	328.986	370.09	409.076	499.443	406.009	474.092
feature_5241	Creb1	2636.63	2393.47	1964.28	2376.69	1967.99	2841.18	2412.41	2126.71	2464.44	2534.29	2048.47	2192.34	3061.66	3070.09	3267.26	2769.65	2736.83	2481.05	2574.27	2356.12	2475.35	2482.61	2310.04	2726.68	2461.06	2218.88	2540.56	1982.86	2602.3	2354.54	2357.89	2249.3	2587	2228.47	2298.06	2666.87	2626.51	2389.87	2898.9	3103.81	2210.42	2330.26	2331.9	2199.61	2184.7	2479.48	2512.77	2671.01
feature_5251	Crebzf	1663.5	1995.28	2787.86	1469.78	1410.91	1926.61	1798.99	1814.33	1637.36	1578.28	1911.05	2148.85	1560.46	1618.12	1857.59	1708.43	1632.92	1494.17	1423.75	1451.33	2097.63	1419.3	1483.68	1501.66	2024.04	2295.4	1892.23	2285.47	2041.41	1668.19	1746.03	1840.33	1693.49	1579.37	1874.62	1661.73	1703.4	1637.49	1667.79	1908.56	1529.94	1431.68	1768.92	1967.21	1668.91	1488.06	2101.14	2009.8
feature_5255	Creld2	775.729	829.206	779.46	936.627	797.567	809.234	684.938	667.73	858.777	706.243	759.519	867.568	986.594	954.452	992.108	1004.72	812.836	820.548	759.271	787.81	755.439	813.669	749.715	738.297	773.109	745.487	693.403	810.497	700.906	808.359	746.167	809.406	919.381	735.823	953.269	764.855	1025.25	978.184	988.999	859.237	925.777	992.011	1178.95	924.124	766.77	768.302	772.727	876.44
feature_5272	Crk	5569.89	4968.33	5298.12	5887.24	5168.19	5332.87	5422.66	5408.97	5666.44	6061.2	5265.5	5074.94	6191.94	6657.01	5652.29	5768.39	5525.59	5888.91	5529.57	5829.07	5130.39	5568.55	4964.5	5889.08	5175.54	4670.41	5049.47	4883.09	5650.33	5641.35	5198.3	5106.93	5421.76	5213.75	5192.98	5765.9	5730.64	5688.98	6029.11	5423.28	5273.02	5334.69	5913.74	5118.48	5212.26	5475.2	5192.99	5404.06
feature_5273	Crkl	3620.43	3742.66	3423.92	3205.25	3522.31	3707.51	3498.96	3540.04	3542.34	3445.09	3523.83	3436.82	4415.24	3955.95	4379.72	3997.29	3957.89	3390.3	3893	3673.1	3521.72	3619.9	3586.87	3716.55	3878.43	3388.3	3651.15	3202.84	4024.83	3583.28	3772.62	3569.91	3731.26	3620.69	3493.9	4089.2	3931.72	3705.9	4188.38	4252.98	3652.23	3510.97	3698.84	3264.72	3387.23	3469.03	3833.7	3984.7
feature_5276	Crlf3	537.782	682.368	766.591	656.54	611.137	637.936	670.268	642.668	753.411	648.107	746.736	663.5	808.82	828.866	802.687	701.658	567.657	699.498	710.945	685.45	608.752	707.337	557.561	644.929	647.479	657.6	763.414	652.842	830.152	737.818	699.407	700.349	819.881	676.482	839.43	683.88	736.783	726.528	733.913	751.713	621.424	678.744	751.967	654.266	616.578	616.135	670.757	687.385
feature_5280	Crnkl1	1301.77	1243.81	1058.89	1270.75	1140.64	1167.58	1183.74	1041.87	1435.96	1373.73	1212.25	1213.26	1485.61	1459.69	1415.95	1348.87	1297.16	1216.96	1436.76	1186.29	1351.97	1553.37	1056.32	1295.05	1156.44	1069.12	1234.31	934.293	1350.45	1203.01	1316.24	1104.2	1372.11	1178.59	1139.45	1350.16	1186.04	1200.54	1265.7	1318.14	1134.74	1441.76	1154.95	1164.24	1038.5	1161.32	1330.29	1284.6
feature_5282	Crocc	2591.81	4076.93	3985.54	2440.63	2338.65	1948.26	2162.09	2562.62	1652.28	1747.31	2884.68	2524.65	1282.88	1442.3	1609.56	2266.26	2102.74	2061.53	1973.92	2166.02	2915.41	1881.61	2835.06	1659.87	3111.76	3498.93	2810.06	4511.7	2057.15	2732.02	2452.4	3115.79	1766.13	2292.37	2957.69	2913.31	2226.43	2560.52	2185.52	2970.37	2736.45	2123.25	1746.92	4135.98	3222.21	2798.75	3025.42	2934.72
feature_5287	Crtap	244.349	253.944	248.177	285.491	240.483	219.537	232.897	289.111	250.826	188.403	249.267	243.097	201.685	217.36	206.166	224.983	231.894	206.061	235.123	229.397	294.597	277.387	258.305	260.219	222.269	274	259.906	299.439	243.577	252.612	306.426	235.154	276.61	265.663	212.783	222.679	239.289	203.393	230.226	228.49	250.75	206.096	272.988	193.857	262.836	210.98	229.199	224.927
feature_5293	Cry1	1500.24	2054.88	1470.68	1542.73	2157.73	2513.35	2337.23	2023.78	2289.14	2068.13	2453.26	2765.51	2528.34	1938.85	2936.56	2339.2	1718.67	1350.02	1769.46	1613.09	1587.89	1511.76	1340.88	1591.57	1633.19	1780.48	1687.95	1745.85	2342.15	1915.09	2217.61	1699.75	2919.33	1938.15	2239.54	2097.41	1854.73	1713.33	1780.2	2186.97	1455.44	1765.1	1621.93	1385.63	1462.4	1616.89	1728.81	1562.85
feature_5294	Cry2	3016.49	4085.57	3843.99	3364.65	3804.71	3709.48	4015.19	4086.94	3536.74	3540.9	3961.64	4067.98	3583.55	3120.32	3674.36	4145.23	3352.8	3126.95	3357.7	3397.09	3074.32	2651.36	3579.52	3018.89	4254.25	4136.89	4237.14	3964.66	3922.09	4191.46	3982.54	4147.57	3872.55	4165.71	4168.43	4274.91	3896.72	3713.65	3853.31	4066.74	3806.68	3291.13	3256.86	3778	3986.02	3883.52	3896.38	3694.81
feature_5296	Cryab	1595.21	982.091	1452.3	1067.21	1554.32	1302.45	1407.47	1578.92	1745.53	1126.11	1552.06	1062.72	1268.33	1967.83	1566.65	1301.61	1438.47	2871.92	2128.19	1614.92	1748.02	2080.4	1737.78	1682.35	1252.01	1207.67	1700.42	1468.63	1217.89	1175.36	1414.73	1530.2	1267.63	1677.97	1257.55	1214.61	1783.79	1152.28	1898.01	1258.61	2335.79	1967.53	3061.87	2415.5	1477.22	1399.37	1755.94	1673.38
feature_5300	Crybb1	84.2952	87.2394	95.5941	68.4458	51.8474	43.3166	55.0151	112.78	74.5952	58.1359	112.916	84.7496	57.1788	87.9101	65.9312	88.3493	94.2068	97.9482	63.1951	101.447	80.678	101.709	116.552	120.168	95.5649	67.2076	58.5029	85.7053	67.9366	86.7461	59.6934	77.5326	53.7301	82.1639	84.0494	54.5696	82.2852	85.3218	72.4185	87.3638	101.754	109.002	139.994	81.5079	100.787	61.6135	70.1629	87.2562
feature_5312	Cryl1	336.114	407.693	461.425	448.5	499.72	404.617	432.786	429.639	400.017	525.376	362.183	427.093	394.014	330.387	345.354	352.37	413.061	354.831	325.269	385.68	396.056	379.096	418.958	371.742	432.726	391.872	429.66	408.423	420.047	422.291	426.808	367.215	350.241	399.864	406.416	358.223	326.303	368.004	282.108	320.654	382.485	394.789	336.985	331.539	472.315	380.884	379.815	316.061
feature_5329	Csgalnact1	964.593	693.596	733.501	775.419	781.02	930.323	860.07	742.022	879.291	958.165	937.415	880.95	807.78	983.434	998.387	778.707	920.328	913.876	1101.27	900.224	1125.82	1128.04	855.767	956.155	670.028	649.329	761.496	811.555	818.553	756.883	883.462	949.135	1035.8	837.158	736.23	697.963	911.758	901.481	876.588	866.918	861.273	833.545	966.958	855.833	826.056	973.68	852.245	899.708
feature_5360	Csrp2	406.538	617.586	302.408	385.458	441.254	383.943	394.275	379.514	412.138	373.577	386.684	367.992	250.547	312.998	271.051	234.228	231.894	273.516	279.731	259.557	381.387	379.096	259.355	293.935	301.727	429.095	331.836	442.282	313.999	407.993	360.15	266.678	379.096	295.79	417.055	288.691	317.791	296.472	285.35	238.09	306.17	352.654	294.987	225.799	333.98	254.856	402.267	369.384
feature_5361	Csrp2bp	1258.03	1517.62	1374.17	1339.2	1375.61	1306.39	1480.82	1318.45	1346.44	1454.47	1557.39	1432.94	1526.15	1322.52	1727.82	1665.28	1490.4	1192.94	1625.42	1609.44	1523.1	1410.05	1515.18	1364.21	1611.72	1452.72	1427.09	1305.68	1574.97	1469.92	1330.17	1432.22	1596.98	1412.31	1578.85	1635.33	1563.42	1661.62	1627.79	1874	1543.57	1505.88	1474.94	1611.43	1505.87	1481.53	1573.52	1439.73
feature_5398	Cth	147.25	123.517	95.5941	97.2651	132.376	163.422	128.369	153.059	185.556	146.416	153.395	129.355	189.21	221.224	159.072	156.152	118.362	154.315	138.472	166.336	134.463	182.613	143.853	113.252	99.8599	76.5132	91.111	125.913	136.702	119.157	119.387	136.321	121.39	132.375	136.181	139.064	151.329	131.861	138.352	123.845	136.277	119.994	169.993	139.885	102.763	117.626	119.745	115.372
feature_5426	Ctsa	2774.27	2879.76	3002.02	2668.49	3125.18	2654.13	2887.38	2743.42	2493.34	2635.49	2885.75	2971.81	2356.8	2411.25	2667.6	2588.84	2484.4	2585.46	2801.03	2672.34	2569.47	2591.26	2893.86	2605.65	2865.87	2889.93	3002.83	2926.68	2805.28	2898.84	2690.18	2809.92	2702.42	3045.54	2797.04	2758.41	2715.41	2482.95	2516.27	2538.35	2786.42	2831.31	3011.87	2805.42	2857.6	2742.74	2646.54	2541.09
feature_5449	Ctu2	381.996	604.629	702.249	384.557	530.608	422.337	453.875	509.301	358.057	344.509	540.079	508.497	354.508	409.603	446.867	463.32	353.879	377.932	397.757	448.741	414.392	328.241	512.41	361.368	551.914	554.204	504.467	670.829	474.727	488.066	445.71	598.108	511.431	554.15	587.282	462.081	483.307	462.806	497.201	468.5	540.567	434.176	471.98	527.599	525.672	456.5	555.69	535.171
feature_5477	Cx3cl1	7523.62	7819.59	7701.76	8208.09	8063.92	7711.35	9140.76	8719.88	6681.86	8256.37	9544.59	8096.93	8314.83	7732.22	9664.68	10335.8	8377.16	8192.54	8291.57	9163.09	7135.11	7283.72	9174.03	7727.04	8846.73	7227.4	7835.55	7801.3	7606.41	7921.54	8152.12	8760.33	7446.59	9117.45	8076.19	8318.34	8572.79	8552	9311.72	8099.87	8781.71	8070.73	8961.61	8646.45	8365.3	8358.9	7275.42	7402.23
feature_5479	Cxadr	962.459	929.402	940.315	1004.17	723.657	1117.37	944.426	890.605	982.792	915.101	880.957	993.577	723.571	895.523	890.595	777.68	725.876	822.396	872.65	656.204	1072.04	889.95	703.514	812.645	789.216	1039.13	952.35	821.078	977.624	790.247	811.83	657.749	924.356	707.522	771.34	789.499	698.005	752.383	726.347	854.437	638.686	630.197	562.976	709.339	727.246	802.843	986.022	793.062
feature_5483	Cxcl12	686.099	511.344	453.153	600.702	615.549	483.374	826.144	643.563	797.236	470.47	524.1	500.692	430.4	491.717	882.223	490.031	548.332	656.992	706.298	565.725	1367.86	998.593	627.912	716.684	659.29	660.702	632.982	647.551	658.653	616.755	495.455	645.821	882.566	709.348	843.686	711.165	736.783	803.232	674.465	1431.42	712.276	883.008	603.974	718.151	997.987	850.453	1532.36	847.354
feature_5527	Cyhr1	3933.07	4298.05	4816.47	4358.02	4239.35	3912.28	4316.85	4436.91	3769.85	3803.59	4340.87	4022.26	4010.83	4028.41	4370.3	4626.01	4152.35	4222.86	4238.72	4398.76	4207.48	4449.75	5187.1	4242.18	4872.74	4155.5	4053	4877.79	4284.97	4277.25	4494.91	4921.19	4256.62	4533.62	4582.29	4328.6	4969.27	4579.8	4948.24	4786.77	5131.29	4848.3	5409.77	4846.42	4776.5	4575.27	4654.14	4610.03
feature_5589	Cyp2j13	19.2065	44.0516	11.9493	9.90663	7.72195	13.7826	1.83384	5.37048	39.1625	3.22977	19.1744	7.80588	38.4657	29.9474	75.35	52.3932	19.3245	7.39232	54.8311	36.5573	24.4479	34.6734	3.15006	4.32258	5.36881	3.10189	2.87719	0	0	9.53254	0.994889	1.70401	4.97501	6.39052	9.57525	7.92139	26.4826	6.89469	4.32349	1.92008	0	10.9918	1.99991	12.116	5.92863	3.73415	13.0971	4.84756
feature_5593	Cyp2j9	2517.12	1557.35	1656.35	2096.6	1915.04	1789.76	1622.03	1714.08	1846.23	1671.94	1669.24	1608.01	1806.85	2211.28	1886.89	1762.88	2148.64	2458.87	2330.78	2052.69	2202.75	2741.51	2021.29	2592.68	1367.97	1453.75	1649.59	1741.62	1795.35	1434.65	1870.39	1766.21	1799.96	1793.91	1570.34	1746.23	1905.8	1881.39	2006.1	1778	2247.67	2402.63	2331.9	1665.41	1847.76	2031.38	1883.17	1989.44
feature_5624	Cyp4f17	293.433	464.701	487.162	284.591	328.734	333.735	319.088	286.426	274.137	283.143	314.247	353.495	293.171	259.866	246.98	325.66	294.698	296.617	280.661	270.524	337.381	245.025	328.656	323.329	330.719	398.076	332.795	411.597	333.055	350.797	309.411	332.282	310.44	294.877	360.668	311.575	258.205	341.287	318.857	317.774	338.876	303.191	302.987	297.394	357.694	335.14	346.137	299.579
feature_5633	Cyp51	3540.4	3647.64	3604.08	3904.11	4249.28	3905.39	3821.72	3297.48	3708.31	4229.92	3470.57	3840.49	5480.84	4285.37	4887.28	4482.19	4204.28	3713.72	4567.71	4328.39	3993.56	4699.4	4461.54	4070.14	3379.13	3418.28	3663.62	3567.88	3705.86	3625.22	4109.89	3727.53	4214.83	3646.25	4087.57	4181.62	4143.58	4780.61	4043.55	3928.49	3486.88	4315.2	4090.82	3270.23	4506.75	3976.87	3609.18	3856.72
feature_5635	Cyp7b1	580.463	483.704	463.264	476.419	540.536	628.091	507.056	572.852	604.221	613.656	657.256	539.721	586.342	737.092	603.846	485.921	634.084	734.612	615.223	467.02	594.083	658.794	560.711	631.097	400.514	414.619	570.643	496.244	591.545	531.915	594.944	477.124	647.746	563.279	637.286	549.217	554.243	528.306	576.105	479.061	571.456	708.972	626.973	505.569	436.743	447.165	497.689	477
feature_5648	Cyr61	153.652	182.253	124.089	114.377	136.789	142.748	105.446	154.849	247.097	134.574	205.592	112.628	154.902	237.647	147.56	135.606	153.388	139.53	154.27	152.627	127.129	147.94	103.952	139.187	140.663	117.872	153.45	104.751	122.617	139.175	187.039	196.813	182.085	208.148	217.039	181.312	171.191	202.532	164.293	167.047	160.807	184.113	163.993	118.958	159.085	132.562	138.455	202.628
feature_5649	Cys1	168.59	223.713	269.318	286.392	225.04	199.847	235.648	226.455	241.502	259.458	196.005	264.285	305.646	314.931	320.237	311.277	237.933	282.756	204.455	229.397	251.813	300.503	240.455	223.91	337.162	206.793	158.245	281.452	274.232	258.332	233.799	293.09	256.71	307.658	229.806	242.043	329.141	313.708	355.607	293.773	256.201	282.123	364.984	302.901	262.836	244.587	209.553	285.037
feature_5668	D030047H15Rik	22.4076	10.3651	10.1109	18.9127	31.9909	37.4098	11.9199	19.6918	14.919	13.9957	26.6311	16.7269	12.4754	20.2869	38.7215	14.3824	14.4934	6.46828	14.8694	15.5369	12.2239	25.4271	12.6002	25.9355	16.1064	21.7132	26.8538	12.6971	17.3984	12.3923	12.9336	15.3361	27.86	15.5198	34.0453	29.0451	14.1871	22.4077	11.8896	23.041	9.08515	7.32787	16.9993	9.91313	8.89295	12.136	13.0971	12.6037
feature_5692	D2Wsu81e	1067.03	1187.67	1296.95	1242.83	1135.13	1057.32	1242.42	1144.81	1116.13	1136.88	1213.31	1203.22	1004.27	1105.16	1167.92	1175.25	1181.21	1150.43	1131.94	1339.83	1326.3	1114.17	1261.07	1225.02	1264.89	1310.03	1235.27	1458.05	1191.38	1181.08	1143.13	1344.47	1112.41	1224.24	1359.69	1066.75	1339.26	1238.46	1228.95	1380.54	1356.41	1456.41	1416.94	1532.13	1258.85	1333.09	1187.16	1306.9
feature_5702	D430019H16Rik	7980.3	6842.68	6940.68	7858.66	6751.19	6877.5	7378.45	8099.58	6900.99	6938.62	7592	6513.45	7074.57	8784.24	9237.7	8783.57	8255.18	8819.96	8367.78	7758.38	7617.96	7926.34	7762.8	8391.86	7899.67	6465.37	7594.82	7933.56	8062.91	7959.67	7985.98	8647.01	7682.41	8520.39	8232.59	8742.58	8669.26	8654.56	10059.7	9136.72	9811.97	8454.53	10070.6	9697.24	7609.4	9769.48	9609.51	9785.29
feature_5722	D630045J12Rik	1484.24	1576.36	1657.27	1363.51	1335.9	1487.53	1672.46	1408.86	1377.21	1597.66	1623.43	1728.45	1526.15	1677.05	1901.54	1983.75	1490.4	1461.83	1571.51	1730.08	1435.09	1275.98	1501.53	1481.78	1646.08	1554.05	1625.61	1679.19	1481.35	1565.24	1594.81	1689.53	1414.89	1500.86	1390.54	1969.79	1679.75	1711.61	1866.67	2145.69	1629.88	1552.59	1415.94	1945.18	1448.56	1713.04	1644.62	1760.64
feature_5756	Daam2	2787.08	1949.5	2971.69	1651.71	2211.79	2451.33	2308.8	2621.69	2829.02	2087.51	2580.02	2329.5	2232.05	2615.08	2860.16	2788.14	2315.31	3557.55	2958.09	2583.69	2590.25	2519.6	2562.05	2295.29	1831.84	2318.14	2530.01	2935.14	2176.46	2062.84	2414.6	2888.3	2188.01	2641.11	2570.42	2632.54	3085.22	2454.51	3256.67	2798.52	3376.95	2758.94	2706.88	3607.28	2409	2519.62	2717.64	2672.95
feature_5757	Dab1	2516.05	2787.34	2354	2184.86	2818.51	3258.59	3180.79	2872.31	2903.62	2727	3144.6	3236.1	3008.64	2599.63	3006.67	2724.45	2750.11	2653.84	2988.76	2477.67	2674.6	2760	2532.65	2607.38	2244.16	2693.47	2672.91	2204	2806.11	2447.96	2641.43	2425.66	2511.38	2308.8	2462.97	2988.13	2548.95	2592.4	2848.1	2944.45	2452.99	2370.57	2294.9	2439.73	2419.87	2491.61	2649.35	2389.85
feature_5774	Dap	358.521	464.701	335.499	361.142	439.048	340.626	408.029	459.176	325.422	440.325	377.097	390.294	338.914	334.251	316.051	321.55	320.062	291.997	395.899	353.692	393.611	409.146	429.458	395.948	386.555	346.378	346.222	328.008	344.654	368.909	362.14	356.991	377.106	353.305	430.886	293.972	349.003	329.222	244.277	294.733	309.804	379.217	409.982	302.901	338.92	332.34	324.62	359.689
feature_5776	Dapk1	2724.12	2713.06	3038.79	2724.32	2705.99	2684.65	2860.79	3113.99	2626.68	3551.67	3242.6	2874.79	2748.74	3187.95	3107.14	3469.25	2839.49	3059.5	2665.35	3203.34	2552.36	2746.13	2850.81	2599.6	3282.49	3193.91	3246.43	3214.48	3074.54	3291.58	3274.18	3541.79	3204.9	3386.06	3169.41	3561.99	3351.94	3450.79	3494.46	4003.37	3277.01	2945.8	3312.86	3617.19	2922.82	3456.89	3299.53	3611.44
feature_5793	Dbn1	8001.64	10852.2	9655	7827.14	7244.29	7013.36	7907.51	7418.43	6180.21	5767.29	9081.21	7844.91	6064.07	5400.19	8910.13	8322.3	7712.88	6188.3	8174.47	7247.49	8660.66	7577.29	9276.93	7403.72	8877.87	8281.01	7394.38	9117.56	7704.17	7654.63	7130.37	7929.62	7765.99	7203.03	8377.28	7306.17	7695.08	7583.3	7291.57	9314.32	7517.96	8473.77	8633.63	9263.27	8634.07	8544.68	9566.47	8410.52
feature_5800	Dbt	1302.84	1115.11	921.012	1132.96	965.243	1292.61	1056.29	1029.34	1264.39	1078.74	1133.42	1137.43	1218.43	1297.4	1203.51	1080.74	1129.27	1168.91	1321.52	1026.35	1109.93	1169.65	973.369	1231.94	807.47	980.197	862.198	757.592	1040.59	1065.74	1050.6	889.495	1120.37	933.929	1061.79	921.522	1091.46	939.402	1039.8	1085.81	965.752	1276.88	1144.95	1013.34	943.641	958.744	1000.99	922.007
feature_5809	Dcaf15	535.648	697.915	816.227	547.567	618.859	617.262	614.336	658.779	600.491	519.993	785.085	675.766	496.935	483.022	582.916	535.233	519.345	520.235	505.561	499.008	583.082	485.427	613.212	569.716	679.692	779.608	723.134	755.476	620.542	628.194	642.699	639.857	623.866	645.443	761.764	614.348	617.612	585.187	558.811	604.826	580.541	614.625	593.974	655.368	677.841	673.081	767.114	668.964
feature_5811	Dcaf4	618.876	671.139	653.533	707.874	720.347	597.573	706.944	623.871	649.911	641.648	590.146	621.125	630.006	549.679	492.914	574.271	649.786	663.461	673.771	707.384	628.311	589.447	697.214	650.116	712.978	756.861	632.982	719.501	669.424	647.259	614.842	678.197	590.036	643.617	737.294	608.187	626.124	619.66	525.304	644.188	698.648	660.424	576.975	624.527	760.841	695.486	636.143	594.311
feature_5818	Dcbld2	1500.24	1379.42	1285.92	1435.56	1253.16	1356.6	1228.67	1282.65	1289.56	1496.46	1291.08	1322.54	1572.94	1469.35	1626.3	1546.11	1423.97	1574.56	1584.52	1509.82	1359.3	1324.52	1373.43	1468.81	1459.24	1470.3	1439.55	1426.31	1415.9	1328.84	1417.72	1354.69	1499.47	1317.36	1316.07	1541.15	1575.71	1578.02	1627.79	1702.15	1410.92	1363.9	1435.94	1384.53	1416.94	1503	1369.58	1423.24
feature_5830	Dclre1c	298.768	273.811	342.852	304.404	234.968	363.269	273.242	234.511	289.056	251.922	255.659	318.926	238.072	229.919	217.678	232.174	275.374	231.01	283.449	271.438	316.6	342.111	210.004	242.065	255.556	375.328	312.655	249.709	304.886	278.35	290.508	287.978	270.64	251.056	271.299	321.257	199.565	259.413	225.902	250.571	235.305	204.264	223.99	291.887	265.8	268.859	278.78	290.854
feature_5861	Ddb2	292.366	349.821	412.709	258.473	335.353	383.943	322.755	310.593	322.624	333.743	331.291	436.014	281.735	293.678	320.237	250.666	252.426	286.452	285.307	333.586	420.504	298.191	279.305	297.394	322.129	417.721	390.339	463.443	344.654	362.236	360.15	275.198	385.066	306.745	356.412	303.653	284.688	285.268	269.137	262.091	302.536	315.098	251.989	319.423	286.551	292.197	351.75	308.305
feature_5884	Ddx19b	1310.31	1447.66	1238.13	1023.99	1023.71	1277.84	1211.25	1140.33	1110.54	1099.2	1167.51	1257.86	896.147	1003.72	1087.34	968.761	989.172	957.306	1081.75	949.577	1040.26	956.985	911.418	1065.95	1162.89	1373.1	1099.09	1144.85	1134.21	1042.86	1094.38	938.059	1138.28	912.932	1059.66	1145.96	965.669	1036.79	1012.78	987.883	957.575	894	830.964	1061.81	995.023	1034.36	1162.83	1050.95
feature_5906	Ddx50	2634.49	2565.36	2591.15	3043.14	2976.26	3328.49	3292.66	2693.3	3177.76	3376.19	2558.72	3075.52	3781.08	3626.53	3362.49	2700.82	3004.96	2921.81	2770.36	2877.06	3046.21	3129.85	2474.9	2988.63	2802.52	3449.3	2975.97	2488.63	3265.1	2814.96	3121.96	2783.5	3266.59	2694.97	2817.25	3204.64	2818.5	3111.23	2621.12	2746.68	2513.86	2970.54	2551.89	2439.73	2717.29	2606.44	2685.83	2516.86
feature_5915	Ddx60	72.5579	37.1415	34.0094	39.6265	41.9191	141.764	20.1722	25.9573	56.8788	29.0679	23.4354	97.016	28.0696	45.4041	21.9771	22.601	48.3112	30.4933	32.5269	29.2459	31.7822	16.1809	33.6007	49.2774	18.254	34.1208	41.2397	43.3817	33.9683	40.0366	46.7598	34.0803	48.7551	38.3431	35.1093	29.0451	26.4826	59.4667	10.8087	24.9611	28.164	21.9836	18.9992	14.319	14.8216	46.6769	19.6456	20.3598
feature_5995	Dennd3	203.802	325.636	307.004	221.548	244.896	290.418	264.073	230.931	229.38	201.322	376.031	316.696	162.18	148.771	244.887	215.737	258.465	148.77	249.992	216.602	289.707	235.779	218.404	230.826	269.514	296.747	252.234	233.838	207.124	234.5	206.937	247.082	217.905	229.146	247.893	199.795	177.812	221.492	205.366	265.932	218.952	200.6	178.992	239.017	209.478	221.249	261.941	222.018
feature_5999	Dennd5a	12506.6	11205.5	11515.4	10471.3	11560.9	11295.8	12062.1	12069.3	11339.4	11476.4	12310	10660.6	11031.3	11923.9	13150.7	12243.6	11885.8	12806.3	13098.1	12269.6	12536.9	12556.4	11852.6	12299.5	11576.2	11442.9	12922.4	12770.1	11660.2	11154	12048.1	11932.3	11163.9	11692.8	11225.4	12199.8	11587.1	12051.1	12352.2	13127.6	13844.9	11913.3	12242.5	13295.7	11585.5	12937.9	13282.3	12049.1
feature_6002	Dennd6b	1485.3	2095.47	2827.38	1440.06	1365.68	1889.2	1950.29	1794.64	1630.84	1617.04	2023.96	2540.26	1545.91	1580.45	2107.71	1651.93	1651.04	1595.82	1437.69	1397.4	2299.32	1250.55	1698.93	1559.59	2178.66	3142.21	2347.79	2423.03	2188.88	1848.36	1826.62	1924.68	1994.98	1886.12	2258.7	1785.83	2007.95	1943.44	1606.18	2087.13	1670.76	1629.54	1692.93	1779.96	1902.1	1519.8	2043.14	2148.44
feature_6007	Depdc7	37.346	31.0952	28.4944	22.5151	48.5379	44.3011	43.0952	40.2786	41.9598	21.5318	30.8921	37.9143	59.258	36.7097	45.0007	48.2839	39.8567	62.8347	61.3364	46.6106	55.0077	90.1508	36.7507	63.9742	26.8441	33.0868	32.6081	44.4398	33.1398	28.5976	28.8518	27.2642	34.8251	50.2112	52.1319	20.2436	41.6155	38.7826	57.2863	48.0021	57.2365	54.959	71.9969	60.5802	39.5242	31.7403	42.0977	20.3598
feature_6019	Dffb	110.971	157.204	172.805	130.587	144.511	127.981	171.464	147.688	136.136	122.731	143.808	180.65	118.516	98.5366	113.025	119.169	143.726	145.074	100.369	122.467	180.914	97.0855	152.253	131.406	136.368	222.302	182.222	243.361	160.728	121.063	132.32	180.625	124.375	146.982	161.715	138.184	138.088	104.282	108.087	124.805	108.113	152.053	140.994	174.03	156.121	115.759	126.293	172.573
feature_6023	Dgat2	1718.98	1742.2	1615.91	1701.24	1809.14	1577.12	1858.59	1742.72	1200.05	1267.15	1315.58	1721.75	1372.29	947.69	920.944	1147.51	1159.47	1336.16	931.199	1468.69	1156.38	1400.8	1209.62	1384.09	1768.49	1486.84	1507.65	1901.39	1375.3	1413.67	1700.27	1260.12	1352.21	1534.64	1725.67	1320.23	1271.16	1082.47	1032.23	1150.13	1410.02	1320.85	1323.94	1301.92	1368.53	1414.31	1213.35	1259.4
feature_6053	Dhrs3	456.688	283.312	390.649	525.051	490.895	348.502	347.512	442.17	349.665	362.811	428.228	349.034	382.578	347.776	356.866	373.944	602.682	498.982	440.507	482.557	601.418	441.508	366.457	477.213	416.62	315.359	405.684	463.443	313.999	344.125	393.976	507.796	342.28	350.566	424.503	323.897	385.889	426.609	428.026	433.939	427.911	443.336	482.979	503.367	426.862	415.424	406.945	477
feature_6063	Dhx29	1374.33	1450.25	1337.4	1546.34	1300.6	1450.12	1445.06	1328.3	1543.19	1590.12	1302.79	1448.55	1751.75	1706.04	1885.84	1849.17	1640.17	1641.1	1650.51	1612.18	1653.9	1636.58	1354.53	1609.73	1613.87	1338.98	1556.56	1244.31	1610.59	1512.81	1544.07	1491.01	1756.18	1491.73	1359.69	1630.05	1640.97	1750.39	1729.4	1766.48	1549.93	1559	1560.93	1585	1627.41	1610.35	1471.55	1574.49
feature_6068	Dhx35	642.351	792.065	796.005	639.428	680.634	701.927	677.603	688.317	700.262	596.431	772.302	861.992	617.531	510.072	770.244	587.626	701.72	592.31	700.722	644.323	770.108	529.347	641.562	661.355	781.699	895.412	745.192	832.717	795.355	814.079	837.697	736.985	789.036	675.57	787.298	724.368	696.114	617.075	624.744	744.032	787.683	654.013	577.975	787.543	671.912	685.217	801.728	692.232
feature_6078	Diap1	2440.29	2538.58	2255.65	2400.11	2536.11	2406.04	2589.38	2632.43	2596.85	2240.38	2831.42	2355.15	2556.41	2575.48	3397.03	2978.19	2463.87	2579.92	2695.09	2635.78	2279.76	2602.82	2318.45	2423.24	3076.33	2876.48	3045.03	3182.73	3333.03	3093.31	3281.15	3235.07	3047.69	3175.18	3541.78	3647.36	3332.08	3640.4	3714.96	4318.27	3125.29	2921.99	3044.87	3490.52	3139.21	3638.93	3828.09	3453.4
feature_6091	Dip2c	3369.67	2955.77	2801.64	3168.32	3078.85	3393.47	3112.94	3184.7	2992.2	3376.19	3266.04	3135.73	3384.98	3403.38	3477.61	3737.38	3361.25	3326.54	3341.91	3697.77	2820.06	3206.13	3458.77	3388.04	3550.93	3271.46	3441.12	2941.49	3046.37	3266.8	3074.21	3316.01	3031.77	3234.52	3074.72	3841	3298.97	3618.85	3821.97	3700.96	3644.96	3171.14	3320.86	3455.28	3097.71	3824.71	3299.53	3345.79
feature_6124	Dlk1	28066	48722.8	29540.4	22369.2	31382	35188.9	36031.2	30678.9	23688.6	19971.8	38615.1	38509.8	24502.7	16218.9	33925.3	27905	22470.7	15913.8	26111.7	21244.4	26098.1	23390.7	25267.7	23063.6	28005.9	27830.1	25717.3	23319.2	27859	28576.6	28513.5	21579.6	32574.4	22335.8	27493.7	25276.3	21828.3	18140.8	20397.2	29769	18313.9	22732.9	21595.1	20292.2	19811.5	22852.1	24678.6	20440.2
feature_6131	Dlx1as	237.947	218.53	285.863	181.021	229.452	232.335	224.645	256.888	232.178	230.39	200.266	199.608	196.487	262.764	332.796	162.316	234.309	364.072	279.731	240.364	290.93	238.091	423.158	272.323	532.586	402.212	528.444	479.315	391.878	448.982	385.022	284.57	368.151	426.339	470.251	416.313	517.356	555.023	413.974	576.985	530.573	632.029	408.982	467.018	521.72	483.573	565.981	514.811
feature_6137	Dlx6os1	423.61	226.304	331.822	266.578	280.196	301.248	251.236	285.531	406.544	291.756	192.809	291.048	339.954	383.52	647.8	239.365	305.568	364.072	394.969	303.426	471.844	353.668	474.609	381.252	658.217	515.947	621.473	487.779	698.421	671.09	483.516	440.487	592.026	513.068	608.56	678.599	726.38	786.857	739.317	940.841	885.802	837.209	603.974	613.512	624.483	674.015	986.022	954.001
feature_6165	Dna2	56.5525	90.6944	94.6749	53.1356	52.9505	55.1303	51.3475	67.131	32.6354	51.6763	68.1757	78.0588	61.3372	53.1325	56.5125	43.1473	49.519	54.5184	62.2658	52.0942	73.3436	53.1659	66.1513	58.7871	56.9094	80.6491	68.0935	56.0788	46.3957	73.4005	60.6883	38.3403	42.7851	42.9078	59.5793	55.4498	43.5071	60.3286	35.6688	62.4027	48.1513	54.959	42.9981	45.1598	37.548	78.4172	73.9049	55.2622
feature_6177	Dnah7a	200.601	190.89	204.057	253.069	168.78	213.63	165.962	172.751	204.204	206.705	131.025	212.989	167.378	181.616	166.398	174.644	172.713	166.327	134.754	117.897	259.148	233.467	124.952	160.8	165.359	160.264	207.158	219.025	188.068	239.267	275.584	167.845	280.59	213.626	185.122	226.2	226.048	200.808	170.778	192.008	158.99	198.769	145.994	131.074	141.299	179.239	188.972	195.842
feature_6183	Dnaja1	16350.1	12490.8	12203	17542.8	13868.6	14823.2	15076	12750.4	16704.7	17253.4	12583.7	13377.1	19454.3	19858	18564.4	15985.1	17540.6	18286.8	16780.2	17541.1	16356.9	19271.5	16359.3	18088.3	14860.9	14664.7	14880.8	12277	16076.9	14473.2	14745.3	14337.6	16499.1	13978.8	14049	14562.2	16545	18028.8	17228	16662.5	15053.2	17689.5	17938.2	14380.6	14911.5	15773.1	13931.5	15604.3
feature_6186	Dnaja4	2710.25	2578.31	2286.91	2316.35	2167.66	2251.48	2460.09	2414.93	2808.51	2074.59	2380.82	2657.35	3161.47	3263.3	3303.89	2947.37	2698.18	2646.45	2834.49	2622.07	2920.3	3037.39	2233.39	2637.64	2624.28	2640.74	2407.25	2599.73	2589.87	2805.43	2807.58	2441	2660.63	2580.86	2843.85	2695.91	3532.59	3063.83	3088.05	3526.23	2576.55	2932.98	3049.87	2474.98	2567.1	2540.16	3148.91	3206.18
feature_6187	Dnajb1	2380.54	2462.57	2925.73	2424.42	2456.68	2539.93	2747.09	2574.25	2816.9	2489.08	2562.98	2832.42	6343.72	4281.51	6221.61	4914.69	3316.56	3089.07	3164.4	3488.48	3410.48	3421.11	3310.71	3356.92	3066.67	2277.82	2436.02	2539.42	3058.8	3067.57	2923.98	2999.06	3263.6	3319.42	2968.33	3008.37	4951.3	4298.84	4593.71	4150.26	2694.66	3053.89	4326.81	3009.18	3136.25	2692.32	3107.75	3589.14
feature_6188	Dnajb11	2205.55	1984.05	1968.87	2486.56	2392.7	2233.76	2182.27	2115.08	2400.1	2271.6	2221.03	2231.37	2450.37	2653.72	2714.69	2501.52	2316.52	2629.82	2220.19	2480.41	2146.52	2716.08	2284.84	2310.85	2251.68	2147.54	2182.83	2170.14	2226.16	2077.14	2292.23	2318.31	2610.88	2183.73	2325.72	2072.76	2513.95	2850.09	2516.27	2393.38	2423.92	2811.15	2793.88	2386.86	2343.79	2390.79	2153.53	2193.04
feature_6195	Dnajb5	1657.09	1757.74	1857.65	1468.88	1605.06	1619.45	1885.18	1636.21	1720.35	1642.88	1777.89	1935.86	1680.02	1518.62	1727.82	1802.94	1460.21	1532.06	1652.37	1490.63	1899.6	1585.73	1783.98	1503.39	1755.6	1699.83	1678.36	1787.11	1716.64	1704.42	1662.46	1646.08	1716.38	1582.11	1683.12	1593.08	1654.22	1545.27	1548.89	1459.26	1516.31	1521.45	1657.93	1501.29	1419.91	1332.16	1539.84	1550.25
feature_6200	Dnajc1	1053.16	868.075	875.054	923.118	771.091	1013.02	869.239	831.53	1017.29	817.132	1027.96	1029.26	910.702	1204.66	1167.92	915.34	1003.67	1063.57	1060.38	976.995	1029.26	1199.7	804.316	999.381	750.56	873.699	960.022	777.696	887.318	795.967	877.492	964.471	981.071	919.322	938.375	948.807	993.097	859.251	995.484	1071.41	963.026	982.851	917.96	899.892	901.152	989.55	928.021	969.513
feature_6218	Dnajc3	4572.22	4109.75	3796.19	4053.61	3710.95	4365.14	3772.2	3890.92	5007.2	4044.75	4383.48	4390.25	5112.82	5745.07	5805.09	4607.52	4595.6	4718.15	5063.97	4400.59	4486.19	5055.38	3907.13	4497.21	3699.11	4155.5	4054.92	4383.67	3970.15	4160	4654.09	3851.07	4932.22	4173.01	4461	4512.55	4929.54	4929.7	4785.02	4983.58	4209.15	4490.15	4738.79	3994.99	3727.13	4645.29	4308.94	4447.16
feature_6254	Dnttip1	981.666	1252.45	1512.96	1225.72	1233.31	1124.26	1119.56	1237	1156.23	1100.27	1090.81	1304.7	1050.01	1052.02	1131.3	1055.06	1115.99	944.369	919.117	1168.01	1237.06	1056.38	1228.52	1007.16	1246.64	1345.19	1258.29	1444.29	1231.97	1142	1157.06	1202.18	1188.03	1176.77	1288.4	1072.91	1117.94	1278.97	1099.25	1088.69	1087.49	1188.03	1253.95	1232.53	1340.86	1071.7	1146.93	1119.79
feature_6259	Dock1	1574.93	1168.66	1374.17	1183.39	1246.54	1330.02	1312.11	1337.25	1490.97	1112.12	1574.43	1151.93	1132.14	1455.83	1522.7	1507.08	1393.78	1719.64	1627.27	1256.66	1296.96	1504.82	1320.93	1288.99	957.796	1076.36	1460.65	1508.84	1197.17	1176.31	1427.67	1265.23	1171.12	1443.35	1171.37	1345.76	1394.12	1144.52	1488.36	1495.74	1681.66	1275.97	1238.95	1908.83	1134.35	1401.24	1553.87	1462.99
feature_6260	Dock10	2823.36	1783.66	2242.78	1595.87	1941.52	2327.29	2013.55	2431.93	2105.45	2368.5	2581.09	1731.79	2095.86	2867.22	2248.99	2332.01	2251.3	3612.07	2929.28	2368	2184.42	2265.33	2206.09	2509.69	1992.9	1976.94	2877.19	2450.54	2004.13	1876	2139.01	2390.73	1793.99	2284.16	1785.25	2301.61	2173.46	1827.09	2925.92	1838.48	3019.91	1884.18	2469.89	3272.43	1811.2	2554.16	2119.85	2123.23
feature_6266	Dock6	473.76	668.547	1103.93	635.826	461.11	554.256	536.397	490.504	382.3	392.955	677.496	625.586	317.082	343.912	432.216	551.67	414.268	416.742	372.665	405.786	656.426	397.588	481.959	404.594	539.029	736.181	585.029	779.812	479.698	577.672	495.455	736.133	574.116	525.849	735.167	594.105	442.638	563.641	459.371	566.425	446.99	407.613	452.98	647.658	593.852	560.123	635.208	636.97
feature_6348	Dsc2	100.301	80.3293	69.8572	145.898	80.5289	79.742	99.0272	70.7114	75.5276	73.2081	84.1543	102.592	76.9314	60.8608	88.9548	73.9669	86.9602	74.8472	83.6406	92.3073	96.5691	97.0855	70.3514	63.1097	80.5322	125.109	93.9882	105.809	91.9629	61.0082	81.5809	52.8244	58.7051	69.3828	93.6247	66.8918	58.64	72.3943	69.1759	69.123	62.6876	51.2951	77.9966	50.6671	87.9414	59.7464	98.228	67.8659
feature_6362	Dsn1	109.904	112.288	97.4325	118.88	145.614	137.826	113.698	131.577	168.772	167.948	143.808	146.082	139.308	147.805	121.397	117.114	103.869	140.454	119.885	92.3073	133.241	69.3468	128.102	135.729	117.04	155.094	139.064	120.622	115.161	98.1851	134.31	126.949	143.28	143.33	168.099	110.9	131.467	118.072	94.0359	134.406	118.107	88.8504	112.995	128.871	141.299	82.1514	108.519	109.555
feature_6367	Dstyk	3407.02	3740.93	2933.08	3178.23	3058.99	3490.93	3599.82	3263.46	3342.8	3369.73	3256.45	3275.13	3725.98	3628.46	4230.06	3920.24	3699.43	3389.38	3761.97	3598.16	3191.67	3564.42	3386.32	3662.95	3740.99	3289.04	3371.11	2948.9	3590.7	3396.44	3170.71	3255.52	3260.62	3312.12	3336.44	3852.44	3624.33	3181.04	3749.55	4019.69	3493.24	3557.68	3193.86	3527.97	3010.76	3539.04	3279.88	3560.05
feature_6379	Dtx3	5656.32	7537.14	8127.34	5708.02	5616.06	5513.03	6127.77	5945.13	5058.49	5398.02	6362.71	5954.77	4503.61	4229.34	5403.22	5610.18	5213.99	4805.93	5052.82	5257.86	5542.33	4482.11	6337.92	4875.01	6668.07	7027.84	5774.52	7213	5587.37	5895.87	5367.43	6211.98	5018.79	5576.19	6318.6	5495.69	5359.89	5320.12	5431.39	6294.99	5508.33	5929.16	5606.76	6389.56	6233.96	6080.13	6354.89	6520.94
feature_6392	Dusp1	1045.69	1801.8	884.245	578.187	579.146	761.979	801.387	810.048	788.844	378.96	749.932	653.464	618.57	529.393	501.287	653.374	385.282	345.591	409.839	335.413	441.284	561.709	492.46	568.852	620.635	706.197	646.409	953.339	656.168	475.674	569.077	482.236	546.256	698.393	698.993	428.635	441.692	405.925	500.444	594.266	443.355	414.025	450.98	410.844	390.302	341.675	464.946	455.671
feature_6393	Dusp10	399.069	405.966	265.641	293.597	338.662	320.937	295.248	326.704	270.408	207.782	292.942	284.357	217.279	254.07	162.212	216.764	213.777	275.364	217.466	231.225	231.032	360.603	327.606	279.239	355.415	375.328	286.76	292.033	323.941	243.08	225.84	236.858	297.505	249.23	248.957	234.121	243.072	227.525	195.638	228.49	294.359	273.879	292.987	259.944	263.824	220.315	246.973	217.171
feature_6395	Dusp12	364.924	411.148	552.424	419.681	392.716	364.254	381.438	401.891	409.341	344.509	365.379	418.172	357.627	383.52	306.633	363.671	392.528	344.667	358.725	437.774	449.841	330.553	373.807	314.684	419.841	430.129	337.59	453.921	380.279	355.564	343.237	425.151	413.921	365.173	333.006	314.215	341.436	303.366	332.909	343.695	380.668	394.789	419.982	310.611	387.337	339.808	361.105	362.598
feature_6398	Dusp15	327.578	300.587	633.311	317.913	497.514	428.244	405.278	431.429	386.03	325.13	513.448	437.129	284.854	316.863	272.097	316.414	381.658	451.856	322.481	326.274	332.491	279.699	345.457	296.529	420.915	473.555	431.578	526.929	409.276	342.218	374.078	425.151	369.146	373.389	385.138	339.74	320.628	280.959	396.68	326.414	384.302	322.426	384.983	554.034	395.242	364.08	356.427	347.086
feature_6399	Dusp16	1650.69	1515.89	1120.47	1018.58	1019.3	1380.23	1331.37	1235.21	1036.87	1010.92	1161.12	1217.72	1022.98	933.199	1181.53	1009.85	1065.26	878.762	1130.08	862.753	1127.05	1148.84	1097.27	1261.33	1287.44	1197.33	1229.52	1024.23	1228.66	1055.25	1093.38	954.247	1226.84	1005.14	985.187	942.646	801.098	867.869	839.838	995.563	1098.4	887.588	728.968	819.485	909.057	1001.69	1017.83	950.123
feature_6401	Dusp19	431.079	336.001	449.476	396.265	347.488	414.462	407.112	442.17	476.477	326.207	395.206	345.689	413.766	512.97	521.171	469.484	464.995	521.159	553.887	463.364	512.183	453.066	468.309	436.581	420.915	295.713	394.175	407.365	420.047	340.312	356.17	405.555	412.926	355.13	378.754	400.471	429.396	409.372	487.474	450.26	438.813	421.353	411.982	394.322	443.659	508.778	449.042	478.939
feature_6404	Dusp22	1107.58	1143.61	1080.03	1194.2	1132.92	1155.77	957.263	989.064	1204.71	1201.47	1103.59	993.577	1100.95	1270.35	1171.06	1198.88	1231.94	1178.15	1177.47	1195.42	1183.28	1118.79	1157.12	1103.99	1170.4	1117.71	1045.38	1249.6	1160.72	1179.17	1125.22	1201.33	1078.58	1133.86	1186.27	1255.1	1151.05	1139.35	1316.5	1154.93	1092.04	1302.53	1300.94	1230.33	1237.11	1207.06	1131.03	1175.05
feature_6411	Dusp5	50.1503	90.6944	87.3215	19.8133	45.2285	32.4875	44.0121	39.3835	39.1625	44.1402	44.7403	42.3748	32.228	24.1511	27.2097	39.0381	35.0256	12.9366	39.9616	40.2131	40.339	32.3618	56.7011	34.5806	74.0896	35.1547	64.2572	26.4522	53.0237	35.2704	41.7854	51.9724	46.7651	26.475	25.534	30.8054	42.5613	32.7498	44.3158	23.041	51.7854	53.1271	52.9977	29.7394	60.2745	52.2781	43.0332	46.5366
feature_6415	Dusp9	9.60325	12.0926	21.141	14.4096	26.4752	19.6894	5.50151	31.3278	10.2568	8.61272	8.52196	12.2664	8.31691	15.4567	2.09305	4.10927	7.24668	11.0885	9.2934	5.4836	12.2239	4.62312	9.45018	8.64516	11.8114	17.5774	17.2631	9.52281	6.62796	5.71952	14.9233	17.8921	10.945	7.30345	8.51133	7.92139	7.56645	16.3749	5.40436	9.60042	6.35961	1.83197	1.99991	2.20292	17.7859	7.46831	3.74202	11.6342
feature_6422	Dvl2	442.817	695.324	744.531	445.798	467.729	546.38	565.739	494.98	480.207	408.028	603.994	607.744	377.38	394.146	495.007	516.741	461.372	379.78	478.61	355.52	514.628	314.372	452.559	436.581	565.873	701.027	544.748	717.385	584.917	487.113	527.291	594.7	468.646	559.627	542.598	600.266	481.416	496.418	480.988	614.427	446.081	457.076	499.978	563.947	565.196	451.832	620.24	605.946
feature_6434	Dync2h1	4231.83	3670.96	3148.17	3644.74	3152.76	4017.62	3665.84	3125.62	3678.48	3519.37	3614.37	3921.9	4136.62	3937.6	4804.61	4726.69	4443.42	3513.2	4083.52	3976.52	3422.7	3777.09	3424.12	3725.2	3381.28	3404.84	3952.3	2977.47	3733.2	4021.78	3649.25	3462.55	3984.98	3240.91	3366.23	4769.56	3819.17	3888.61	4224.05	5437.68	3574.1	3356.17	2558.89	4043.45	3445.52	4181.32	3623.21	3893.56
feature_6436	Dynll1	4157.14	3000.69	2787.86	5200.08	3837.81	3840.41	3988.6	3739.65	4487.83	4247.15	2796.27	3476.96	4945.44	4825.39	4271.92	3777.45	4383.03	4602.64	4099.32	4612.62	4300.38	5404.42	4076.18	4666.66	3363.02	3336.6	3153.4	3154.17	3366.17	3551.82	3487.09	3350.09	4165.08	3757.63	3519.44	3348.11	4193.71	4037.7	3705.23	3450.39	3754.89	4648.62	4978.78	3769.19	3879.3	3795.77	3573.63	3733.59
feature_6454	Dzip1	5670.19	5291.37	6426.87	5643.18	5180.32	5919.61	5277.78	5265.76	5382.04	5368.95	5530.75	5407.25	5633.67	6106.37	6730.22	5647.17	6315.48	6072.79	6061.15	5575.91	6411.46	6070.15	5789.81	6334.31	5058.5	5593.74	5486.8	6485.03	5694.24	5422.11	5763.39	5958.93	5408.83	5421.9	6214.34	5852.15	6330.28	6387.93	6220.42	6468.76	6095.23	6155.41	5637.76	6483.19	5826.86	5490.14	5618.64	5938.27
feature_6471	E130102H24Rik	109.904	119.198	196.703	117.979	119.139	203.785	152.209	112.78	148.258	123.808	138.482	144.966	76.9314	112.061	137.095	119.169	84.5446	123.821	100.369	85.9097	228.588	115.578	76.6515	181.548	142.81	234.71	164	123.797	178.126	142.035	116.402	127.801	183.08	111.378	137.245	124.982	75.6645	108.591	109.168	93.124	72.6812	93.4304	102.996	148.697	155.133	121.36	165.584	143.488
feature_6478	E130307A14Rik	894.17	1166.07	1092.9	872.684	897.952	954.935	964.599	964.897	816.817	824.668	961.916	1068.29	847.285	811.478	904.2	876.302	834.576	895.395	911.682	837.163	986.472	848.342	836.866	853.277	964.239	970.891	920.701	1012.59	944.484	1026.65	1069.51	926.983	865.651	934.842	935.183	929.444	867.305	974.737	849.566	979.242	830.383	930.64	887.962	927.428	977.237	974.614	970.119	824.086
feature_6487	E230016M11Rik	48.0163	73.4193	108.463	84.6567	59.5693	62.0216	50.4305	64.4458	63.4059	66.7486	55.3927	90.3252	45.743	43.472	59.6521	87.322	64.0123	36.9616	59.4777	62.1475	70.8989	48.5427	61.9512	53.6	60.1307	58.9359	57.5438	37.0331	50.5382	56.242	56.7087	56.2324	55.7201	52.95	68.0907	42.2474	36.8865	56.8812	35.6688	45.122	29.0725	37.5553	45.998	42.9569	47.4291	52.2781	41.1622	36.8415
feature_6495	E2f6	1868.37	1952.95	2260.25	1844.43	1838.93	1985.67	1860.43	1724.82	1964.65	1862.5	1925.96	1906.87	2323.54	2193.89	2200.85	2233.39	1975.93	1884.12	1961.84	2275.69	2180.75	2265.33	1872.19	2238.23	2032.63	1974.87	1891.27	1858.01	2088.63	2080.95	1947.99	2137.68	2267.61	2080.57	2004.42	2117.65	2215.08	2101.16	2127.16	2225.38	2061.42	2215.77	2420.9	1940.77	2126.4	2253.56	2013.21	2243.45
feature_6541	Ece2	4642.64	5579	6075.74	4771.39	4780.99	4921.36	4801.9	5040.2	4422.56	4431.24	4981.08	5481.96	4464.1	4475.69	5075.66	4740.04	5220.02	4764.35	4847.44	5381.24	5231.85	4958.29	5599.76	4859.44	5762.88	5728.15	5043.71	5341.24	5153.24	5241.94	4656.08	5137.6	5314.3	4727.16	5222.77	4586.49	4762.14	5037.43	4656.4	4804.05	4846.93	5143.25	4586.8	5135	5044.28	4949.62	4499.78	5051.16
feature_6566	Edem3	4259.58	3785.84	3657.39	3959.05	3864.28	4384.83	3779.54	3642.98	3858.44	4250.38	3833.82	3989.92	4584.7	4387.78	5063.1	4521.23	4206.7	3827.37	3996.16	4081.63	3832.21	4109.95	3662.47	4090.89	4026.61	3812.22	4044.37	3700.14	4362.02	4015.1	4069.1	3858.74	4326.27	3613.38	3957.77	4425.42	4118.99	4346.24	4486.7	5019.1	3732.18	3370.82	3795.84	3860.61	3774.56	4258.8	4242.52	4250.34
feature_6584	Eef2k	1262.29	1195.44	1348.43	1010.48	1312.73	1277.84	1244.26	1396.33	1274.65	1252.07	1358.19	1355.99	1092.63	1308.02	1158.51	1138.27	1066.47	1176.3	1149.59	1118.65	1193.06	968.543	981.769	1126.46	1239.12	1390.68	1285.14	1472.86	1155.75	1423.21	1341.11	1335.09	1123.36	1315.53	1352.24	1370.4	1227.66	1045.41	1184.64	1155.89	1297.36	1239.33	1042.95	1348.19	1138.3	1111.84	1208.67	1162.45
feature_6595	Efcab5	104.569	89.8307	107.543	74.75	73.9101	91.5556	135.704	76.9769	78.325	99.0463	61.7842	69.1378	101.882	95.6384	93.1409	85.2674	137.687	125.669	78.9939	142.574	105.126	104.02	90.3018	101.148	81.606	132.347	77.6841	90.9957	86.9919	93.4188	97.4992	95.4247	67.6601	69.3828	53.1958	94.1766	56.7484	68.9469	85.3889	107.525	119.924	109.918	66.9971	129.972	105.727	113.892	72.9694	84.3476
feature_6597	Efcab7	122.708	150.294	110.301	173.816	84.9414	154.562	103.612	109.2	138.001	119.501	100.133	133.815	82.1295	114.959	92.0944	104.786	140.102	119.201	135.684	102.361	160.134	154.874	114.452	141.781	140.663	129.245	135.228	130.145	72.9075	100.092	105.458	138.877	107.46	85.8156	138.309	93.2964	104.039	89.631	65.9332	90.2439	72.6812	142.893	75.9967	114.552	108.692	109.224	151.552	106.646
feature_6615	Efnb3	8328.15	9431.36	7805.63	9149.22	9228.83	7944.67	8288.03	9665.08	5913.53	6722.23	10071.9	8457.12	6990.36	6400.05	8162.91	7502.5	7356.59	7081.84	7990.46	7323.35	7680.3	7145.03	8191.21	7749.52	9615.55	8763.87	9518.7	8483.77	7746.42	8042.6	8079.5	8129.84	7705.29	8688.37	8721.99	8392.28	7794.39	8306.38	7922.8	7697.61	8150.29	6893.69	8424.63	9110.16	9760.51	8766.86	9698.38	8453.18
feature_6621	Egf	69.3568	83.7844	94.6749	89.1597	57.363	74.8197	69.6858	54.5999	63.4059	48.4465	80.9586	74.7134	50.9411	46.3701	42.9076	47.2566	61.5968	60.9866	46.467	40.2131	57.4525	67.0352	79.8015	63.1097	46.1718	114.77	89.1929	121.68	79.5355	46.7094	56.7087	69.0125	75.6201	61.1664	64.8989	48.4085	49.1819	54.2957	43.2349	40.3217	59.0535	48.5471	68.997	71.5948	74.1079	59.7464	57.0658	43.6281
feature_6629	Egln1	2718.79	2681.96	2715.24	2433.43	2723.64	2585.22	2813.11	3008.37	2770.28	2650.56	2741.94	2697.49	2895.32	3015.03	2795.27	2910.39	2659.53	3012.37	2865.15	2714.38	2824.95	2910.25	2526.35	2841.66	2456.77	2494.95	2622.08	2488.63	2635.44	2505.15	2835.43	2566.24	2786	2953.33	2976.84	2910.67	3083.33	2603.61	2878.36	2836.92	2678.3	2789.17	2936.87	2760.26	2494.97	2694.19	2750.38	2835.83
feature_6631	Egln3	173.926	131.291	163.613	173.816	191.946	131.919	229.23	127.997	169.704	104.429	92.6763	118.203	180.893	159.397	110.932	127.387	160.635	258.731	170.999	226.655	158.911	187.236	187.954	148.697	120.261	89.9548	101.661	148.133	100.248	101.045	123.366	130.357	107.46	126.898	104.264	91.5361	135.25	118.933	132.947	96.9642	139.911	165.793	181.992	99.1313	119.561	97.088	156.229	121.189
feature_6653	Eif1ad	783.199	812.795	762.914	903.305	865.961	884.053	821.559	853.907	872.764	869.885	825.565	806.236	792.186	757.379	777.57	754.051	741.577	815.003	751.836	725.663	834.895	776.684	806.416	732.245	856.863	790.982	866.034	929.003	868.262	849.349	871.523	834.114	920.376	872.763	788.362	830.866	823.798	819.606	713.376	734.432	764.061	885.756	789.966	721.455	806.294	778.571	794.244	758.159
feature_6664	Eif2b4	767.193	1049.46	1145.29	854.672	988.409	943.121	1014.11	922.828	883.021	904.335	973.634	1019.23	876.395	896.49	902.107	903.012	810.42	788.206	926.552	877.376	853.231	910.754	909.318	840.31	933.1	963.653	920.701	1035.87	975.138	919.89	994.889	938.911	972.116	1017.92	1019.23	933.844	940.132	804.955	799.846	850.597	883.985	1059.79	936.959	970.385	918.938	885.928	826.986	922.007
feature_6666	Eif2d	590.067	640.907	668.24	653.838	638.715	649.75	687.689	635.507	633.127	712.702	583.754	640.082	584.263	644.352	620.591	535.233	591.812	576.601	554.816	627.872	755.439	596.382	596.412	620.723	579.832	760.997	660.795	771.348	630.484	684.436	701.397	665.417	616.901	681.96	693.674	686.521	645.04	668.785	541.517	721.951	602.346	537.683	586.975	579.367	646.221	666.546	691.338	699.019
feature_6685	Eif4a1	8459.4	8260.1	7158.53	9705.8	9293.91	9362.3	9829.37	9234.55	9657.28	9688.23	8358.97	9585.62	10992.9	9672.04	10486.2	9184.22	8811.96	8521.5	8612.19	9008.64	8417.41	9234.68	7548.6	8759.28	8898.27	9134.03	8578.82	8058.41	9936.14	8660.31	9151.99	8753.51	10432.6	8986.9	9015.63	8336.83	8688.18	8589.92	8027.64	7975.07	8042.18	8758.64	8536.63	7169.39	8379.14	8613.76	7838.6	7923.83
feature_6688	Eif4b	13701.7	15019.9	13561.5	14769	15503.5	14648.9	15099.8	14862.8	14242.1	15444.8	14927.3	15001.8	14409	13602.9	13634.2	13758.9	14987.3	13920.7	14290.5	14960.2	13164	14186	13942.2	13787.3	14992.9	16379	15317.2	15161.4	15410	14477.1	14936.3	14997	14954.9	14671.7	15147	15742.5	13639.5	14612.4	13208.3	13864	14620.7	13934.9	12448.5	14194.5	15363.1	15630.2	14203.8	12663.8
feature_6697	Eif4g1	13081.8	14620.8	13396	13161.4	13527.7	13327.7	13166	13419	12494.7	13305.6	14142.2	13067	14538	13274.4	16356.2	16932.3	13827.9	13034.5	13597.2	13933.8	12259.4	13612.8	14391.6	12786.2	14394.9	14122.9	14283.3	13307.6	14022.3	14298.8	13880.7	14563.3	14467.3	13610	14651.2	14991.7	14497.3	15424.3	15478.1	16271.7	13723.1	13283.6	13195.4	14957.8	14132.9	14321.4	13527.4	13800
feature_6725	Ell2	1552.53	1454.57	1304.31	1114.95	1041.36	1466.86	1512	1204.78	1556.24	1162.72	1378.43	1403.94	1294.32	1100.32	1697.47	1205.04	1126.86	1040.47	1500.88	989.79	1362.97	1472.46	1058.42	1272.57	1097.39	1096	1094.29	1100.41	1809.43	1318.35	1304.3	1192.81	1695.48	1121.08	1100.09	1165.33	1152.94	1062.64	1148.97	1406.46	1127.47	1286.96	1135.95	995.719	900.164	1071.7	1151.61	1100.4
feature_6728	Elmo2	3943.74	4278.19	4395.49	3704.18	3917.23	3785.28	3922.58	3702.05	3725.1	3691.63	4510.25	3938.63	3424.49	3657.45	4152.62	4137.01	3960.31	3810.74	4574.21	3925.34	4455.63	4209.35	4745.04	3979.37	4087.81	3935.26	4130.69	4249.29	3766.34	3911.2	4124.81	4250.66	3555.14	3920.13	4310.99	3756.5	3826.73	3592.13	4275.93	4317.31	4324.53	4072.46	4292.81	4740.68	4117.44	4299.88	4815.04	4568.34
feature_6747	Elp6	488.699	553.668	583.676	505.238	533.917	567.054	430.952	500.35	416.801	391.879	508.122	489.54	493.817	481.09	489.775	474.621	531.423	498.982	499.985	507.233	565.968	520.101	556.511	519.574	525.07	565.578	516.935	610.518	554.263	478.533	532.266	494.164	494.516	495.722	556.429	460.321	477.632	492.97	484.231	406.098	439.721	557.834	503.978	498.961	520.732	482.639	533.238	479.909
feature_6760	Emd	1090.5	1060.69	885.165	1387.83	1076.66	1123.28	1115.89	1302.34	1092.82	1163.79	908.654	1111.78	1159.17	1003.72	923.037	852.674	969.847	997.963	1005.55	998.015	940.021	899.196	894.617	995.058	1132.82	1094.97	998.385	886.679	939.513	1126.75	1133.18	867.342	1119.38	1049.87	910.713	920.642	1011.07	1065.23	827.949	801.635	969.386	785.914	878.962	755.601	969.332	863.523	990.7	892.921
feature_6768	Eml1	2112.72	2237.13	2048.84	2187.56	1971.3	2027.02	2078.65	1929.79	1881.66	2284.52	1987.75	1905.75	2034.52	2066.37	2208.17	2353.59	2308.07	2014.41	2182.09	2176.99	2167.3	2288.44	2284.84	2035.07	2298.93	2047.25	2273.94	2157.45	2031.47	2243.01	1890.29	2248.44	1847.72	1931.76	2204.44	2103.57	2162.11	2163.21	2200.66	2413.54	2024.17	2047.22	2233.9	2412.19	2103.68	2465.47	2364.96	2154.26
feature_6775	Emp2	1149.19	949.268	844.721	969.049	1045.77	943.121	897.663	1049.03	897.007	890.34	1114.25	764.976	632.085	882.965	760.825	745.833	741.577	1118.09	999.97	746.683	1014.59	1128.04	829.516	1055.57	578.758	858.189	1008.93	1099.36	677.709	841.723	980.961	834.114	740.281	860.895	859.645	685.641	692.33	740.318	807.412	768.033	1093.85	939.799	1099.95	991.313	825.068	993.285	1069.28	1116.88
feature_6782	Enah	11988.1	11437	11006.2	10170.5	10229.4	11373.6	10338.3	11226.1	11365.5	10837	11157.4	10301.5	11292.3	12811.7	12386.7	12238.4	12117.7	12329.5	11731.1	11681.9	10958.8	11162.5	10104.3	10953.4	10789.2	10672.6	11066.6	11344.8	10966	10829.9	10517	11234.6	11499.2	10559.9	11081.8	12529	11449.9	11783.9	12499.2	13512.6	11419.1	11195.2	10896.5	11096.1	10828.7	11281.8	11532.9	11293.9
feature_6788	Endov	1170.53	1464.07	1406.34	1302.27	1330.38	1236.49	1265.35	1420.49	1087.22	1085.2	1441.28	1273.47	1033.38	984.4	1116.64	1297.5	1304.4	1119.94	1283.42	1263.06	1172.28	1162.71	1383.93	1203.41	1489.31	1293.49	1355.16	1800.87	1163.21	1372.69	1286.39	1404.11	1259.67	1312.8	1245.85	1349.28	1236.17	1409.1	1239.76	1343.1	1393.66	1304.36	1276.94	1625.75	1430.78	1326.56	1390.16	1441.67
feature_6834	Epb4.1l5	1396.74	1775.02	1160.92	987.961	1217.86	1636.19	1633.95	1254.9	1568.36	1154.1	1576.56	1828.81	1727.84	1234.61	1881.66	1606.73	1260.92	908.331	1357.77	1230.15	1284.74	1125.73	1054.22	1228.48	1234.83	1355.53	1179.65	956.513	1580.77	1393.66	1398.81	886.087	1718.37	1274.45	1244.78	1416.17	1189.82	1064.37	1094.92	1627.27	914.875	1018.57	832.964	844.819	850.759	1087.57	1307.84	1106.21
feature_6846	Epha4	3207.49	2871.99	2525.89	2411.81	2659.66	2697.45	3242.22	2776.54	2718.06	3491.38	3119.04	2822.38	3171.86	3443.95	3984.13	4131.87	3180.08	3005.9	3430.19	3352.31	2823.73	3425.73	2760.5	3205.63	3364.1	2567.33	3069.96	2851.55	3950.26	3257.27	3149.82	3161.8	2775.06	3101.23	2945.99	3549.67	3246.95	3719.69	4153.79	4765.65	3106.21	3343.34	2890.87	3839.68	2699.5	3688.41	3478.21	3402.99
feature_6850	Epha8	322.242	615.858	647.099	173.816	217.318	295.341	364.017	339.236	159.447	201.322	296.138	312.235	112.278	138.144	223.957	198.272	148.557	116.429	248.134	111.5	286.04	177.99	281.405	229.961	307.096	367.057	264.701	324.834	234.464	252.612	252.702	184.033	241.785	214.539	164.907	214.758	188.216	118.933	164.293	264.011	181.703	141.062	112.995	201.567	201.574	231.517	247.909	267.586
feature_6851	Ephb1	2804.15	3510.31	2360.44	3157.51	3210.12	2946.52	2917.64	2909.01	2000.08	2448.17	3561.11	2871.45	2295.47	1876.06	2939.7	2578.57	2449.38	2168.72	3136.52	2681.48	3060.87	2665.23	2680.7	2589.23	2501.87	2549.75	2765.94	2348.96	2530.22	2152.45	2540.95	2141.94	2237.76	2096.09	2376.79	2428.35	2024.97	2616.54	2214.71	2437.55	2111.39	2184.62	1833.92	2541.06	2574.02	2182.61	2689.58	2256.06
feature_6856	Ephx1	1012.61	742.83	814.388	851.07	1081.07	974.625	1033.37	1039.19	1174.87	1045.37	1115.31	1130.74	1020.9	1253.93	928.27	969.788	958.977	1267.78	1065.95	1013.55	1025.59	1333.77	760.215	979.497	715.126	916.091	1052.09	1254.89	844.236	1019.98	1179.94	1355.54	1592	1419.61	1261.81	1275.34	1157.67	1137.62	1124.11	744.992	1258.29	1030.48	1183.95	1064.01	927.831	1170.66	1008.47	1000.54
feature_6870	Eps15	8473.27	6396.12	6436.06	7178.71	6715.89	8769.65	7688.36	7896.4	8896.41	9055.2	8235.41	7418.93	7885.47	9540.66	8071.87	7693.58	7273.25	9353.13	8846.39	7595.7	7588.62	8541.21	6440.83	7984.67	5238.89	5991.81	7058.71	6220.51	6547.59	5928.28	6721.47	6709.55	6384.92	7120.87	6243.06	6638.13	6230.03	6751.63	7866.59	6585.89	6940.15	6913.85	6800.71	6480.98	5980.02	6710.27	6806.73	6085.63
feature_6872	Eps8	2262.1	2010.82	2168.33	1959.71	2146.7	2163.86	2131.84	2602.89	2569.8	2653.79	2810.12	2120.97	2245.57	2934.84	2336.9	2721.36	2215.07	2713.91	2393.05	2319.56	1930.16	2690.65	1955.14	2222.67	1858.68	1922.14	2074.45	2212.47	1741.5	2052.35	2433.5	2569.65	1960.15	2663.93	2117.19	2504.04	2543.27	2345.92	2822.16	2175.45	2587.45	2308.28	2718.88	2602.75	1910.01	2630.71	2254.57	2523.64
feature_6888	Erc1	2075.37	1995.28	1882.47	1926.39	1725.3	1865.57	1919.11	1738.25	1989.83	1977.7	1931.29	2045.14	2271.56	2252.82	2782.72	2582.68	2044.77	1816.66	2206.25	2222.69	1816.48	1874.67	2161.99	2048.04	2295.7	1986.24	2319.01	1913.03	2368.67	2504.2	1961.92	2073.78	2141.24	1801.21	2078.89	2717.92	2532.87	2451.06	2660.03	3140.3	2158.63	2031.65	1990.91	2501.41	2028.58	2480.41	2394.89	2441.23
feature_6894	Ercc5	1142.79	1253.31	1143.45	1227.52	1129.61	1258.15	1286.44	929.989	1094.68	1184.25	1078.03	1240.02	1030.26	1040.43	1166.88	982.116	1036.28	997.039	1106.84	1022.69	1306.74	1054.07	1073.12	1103.12	999.673	1112.54	1060.72	981.907	1136.69	1008.54	1177.95	1093.12	1064.65	922.974	1025.62	1013.94	1019.58	916.132	993.322	1023.4	889.437	1201.77	801.965	959.37	930.796	912.067	1038.41	965.635
feature_6920	Ermard	210.205	201.255	280.348	216.145	206.286	217.568	201.722	197.813	223.786	179.791	213.049	245.328	195.447	177.752	191.515	182.863	193.245	218.073	194.232	210.205	193.138	258.895	200.554	233.419	217.974	262.627	222.503	239.128	180.612	191.604	179.08	192.553	213.925	202.671	195.761	220.039	197.674	215.459	193.476	177.608	185.337	152.053	175.992	187.248	245.05	213.78	217.037	199.72
feature_6979	Etnppl	4970.22	4327.42	4407.44	3454.71	3898.48	6416.77	4476.4	5417.03	6416.12	4418.32	5484.94	6703.02	6378.03	7036.67	6659.05	6011.86	6513.56	6009.03	6387.35	5954.27	5503.22	6241.21	4806.99	6246.99	3838.7	4209.26	4120.14	5038.62	6280.82	5022.69	6474.74	6908.92	7404.8	6625.15	7526.15	7166.22	6300.02	6289.68	6216.1	6889.26	6660.33	6884.54	5571.76	5252.86	5782.39	6421.81	6005.94	6258.21
feature_6987	Etv4	210.205	234.078	231.632	169.313	190.842	169.329	143.039	171.855	133.339	114.119	148.069	176.19	92.5256	116.891	119.304	156.152	167.881	242.098	224.9	188.27	249.368	157.186	238.355	184.142	187.908	174.74	143.859	280.394	110.19	109.624	127.346	140.581	123.38	123.246	131.926	110.9	134.305	134.446	161.05	140.166	221.678	152.053	228.99	235.712	193.669	157.768	205.811	196.811
feature_6992	Eva1c	64.0217	101.059	68.0189	84.6567	87.1477	43.3166	81.6058	77.872	73.6628	59.2124	68.1757	89.2101	53.0203	56.9966	52.3264	45.202	59.1812	38.8097	70.6298	59.4057	85.5676	76.2814	61.9512	69.1613	83.7535	80.6491	69.0526	84.6472	53.0237	98.1851	54.7189	63.0485	89.5501	76.6863	55.3237	70.4124	95.5265	77.5653	36.7497	48.9621	70.8642	69.6148	58.9974	45.1598	85.9652	56.9458	46.7752	60.1098
feature_7003	Ewsr1	6984.77	8544.28	9153.14	6959.86	7247.6	7606.01	7683.78	7702.17	7477.24	7314.35	7944.59	8201.75	6630.66	6422.27	7394.76	7298.07	6932.66	6569.92	6780.46	6299.74	7962.67	6812.16	7211.54	6468.31	7986.65	9356.33	8171.22	7806.59	8174.76	7585.04	7398.99	7840.16	7600.82	7362.79	8387.92	7350.17	6773.87	6695.61	6650.61	7510.41	6551.3	7411.23	6085.74	7509.74	7753.67	7051.01	7742.24	7303.34
feature_7005	Exd2	2167.13	1752.56	2139.84	1684.13	1431.87	1735.62	1809.08	1598.61	1655.08	1479.23	1631.95	1904.64	1413.87	1595.91	2116.08	1681.72	2047.19	1853.62	1769.46	1877.22	2158.75	1664.32	1967.74	1800.79	2082.03	2123.76	1853.87	1947.94	1949.45	1825.48	1669.42	1718.5	1742.25	1709.92	1758.65	1796.4	1817.84	1824.51	1712.1	2190.82	1767.06	1979.44	1858.92	1931.96	1762.78	2102.33	2154.47	2065.06
feature_7006	Exo1	18.1395	9.50132	4.59587	23.4157	13.2376	5.90682	6.41843	2.68524	3.72976	10.7659	4.26098	6.69076	11.4358	1.93209	7.32569	4.10927	2.41556	5.54424	11.1521	3.65573	6.11197	16.1809	5.2501	10.3742	13.9589	16.5434	3.83625	5.29045	10.7704	14.2988	12.9336	3.40803	10.945	4.56466	4.25567	6.16108	2.83742	5.17102	2.16175	4.80021	9.08515	7.32787	1.99991	2.20292	6.91674	13.0695	6.54853	0.969513
feature_7012	Exoc3l4	204.869	236.669	292.297	126.985	212.905	201.816	162.295	179.016	143.596	102.276	233.289	157.233	86.288	70.5213	162.212	217.791	270.543	256.883	237.911	163.594	244.479	196.482	287.706	261.084	198.646	200.589	169.754	173.527	184.754	135.362	200.968	223.226	160.195	217.278	154.268	165.469	168.354	163.749	134.028	216.969	261.652	214.34	240.99	284.176	245.05	224.049	214.231	264.677
feature_7019	Exog	742.652	697.051	770.268	916.814	899.055	872.24	816.058	683.842	678.816	811.749	770.172	802.891	1034.42	906.15	970.131	890.685	867.186	885.23	800.162	952.318	784.777	970.855	879.917	795.355	953.501	814.763	898.642	806.265	869.091	804.546	828.743	894.607	823.861	875.502	800.065	909.2	1050.79	1039.37	1012.78	829.476	896.705	948.043	1109.95	990.211	898.188	855.121	768.985	943.336
feature_7021	Exosc10	1785.14	2104.11	2156.38	1784.99	2029.77	1953.19	1901.69	1745.41	1561.84	1849.58	1852.46	1876.76	1807.89	1550.5	1993.63	1766.99	1599.1	1849.93	1898.64	1732.82	1963.16	1747.54	1834.39	1953.81	1860.83	2113.42	1950.73	1932.07	2121.77	2018.04	1813.68	1801.99	1845.73	1751.92	1846.96	1766.47	1919.99	1809.86	1846.13	1831.76	1855.19	1978.53	1827.92	1973.81	1947.56	1811.06	1906.56	1916.73
feature_7072	Faah	1004.07	1128.07	1330.04	940.229	847.208	883.069	1136.06	1016.81	865.304	863.425	993.873	1068.29	884.711	934.165	956.526	1100.26	1171.55	956.381	1032.5	1040.97	1111.16	977.789	1067.87	981.226	1061.95	1026.73	1042.5	1139.56	893.946	993.29	996.879	1040.3	890.526	1065.39	1101.15	1007.78	1047.95	1047.13	955.492	1006.12	1042.07	1004.83	1083.95	1190.68	1119.52	1174.39	1007.54	1077.13
feature_7079	Fabp3	1593.07	1606.59	1587.41	1996.64	1803.63	1446.19	1715.55	1522.53	1666.27	1830.2	1423.17	1538.87	1622.84	1710.87	1266.3	1382.77	1565.28	1415.63	1300.15	1645.99	1420.42	1710.55	1387.08	1690.13	1544.07	1684.33	1499.02	1607.24	1363.7	1382.22	1443.58	1554.06	1399.97	1461.6	1415.01	1248.94	1265.49	1408.24	1288.4	1184.69	1417.28	1730.29	1652.93	1309.63	1522.67	1711.18	1407.94	1376.71
feature_7085	Fadd	176.06	247.034	170.047	194.53	225.04	140.779	178.799	176.331	169.704	141.033	169.374	176.19	123.714	122.688	159.072	122.251	206.53	163.555	218.395	165.422	158.911	182.613	198.454	178.955	181.466	154.06	195.649	172.469	192.211	131.549	169.131	161.881	134.325	148.808	168.099	142.585	139.979	143.065	126.462	168.967	194.422	98.0103	150.993	189.451	141.299	191.375	185.23	183.238
feature_7105	Fam107a	9343.96	5755.21	7027.09	7088.65	6819.58	7069.47	6961.25	7353.98	9661.94	5503.53	7462.04	7639.73	8920.93	10793.6	9245.02	8158.96	7990.67	9255.19	8778.54	7577.42	8133.81	7618.9	8238.46	8047.78	5391.36	4480.16	5417.75	5928.48	6531.02	6535.51	6339.44	8266.17	7083.42	7416.66	6902.69	7159.18	9478.87	7318.72	9730.02	8501.17	8545.5	8820.01	10233.6	7657.34	6203.33	7424.43	7020.03	8076.04
feature_7117	Fam118a	1190.8	1216.17	1046.94	1110.44	1108.65	1253.23	1127.81	1167.19	997.711	1073.36	966.177	1040.41	1123.82	988.264	990.015	921.504	1015.74	1107	1015.77	1081.18	1156.38	1162.71	1099.37	1159.32	1116.71	1258.33	1153.75	1131.1	1119.3	1183.94	1099.35	1079.49	1110.42	1077.26	1255.42	1106.35	1025.25	1241.04	1049.53	943.721	1077.5	1075.37	1096.95	912.008	1042.45	1137.05	1093.61	1049.98
feature_7128	Fam126a	1111.84	846.481	943.073	1178.89	978.481	897.836	974.685	1107.21	1163.69	845.123	1173.9	1079.44	1149.81	1690.58	1330.14	1493.72	1099.08	1278.87	1111.49	1071.13	960.802	1315.28	851.567	971.716	923.436	935.736	1106.76	1284.52	1101.9	1106.73	1270.47	1519.98	1059.68	1326.49	1156.48	1482.18	1198.34	1386.69	1723.99	1464.06	1335.52	1133.99	1238.95	1262.27	1067.15	1435.78	1310.64	1411.61
feature_7132	Fam129c	58.6865	79.4656	178.32	52.235	31.9909	72.8507	47.6798	41.1737	37.2976	35.5275	56.458	54.6412	32.228	38.6418	56.5125	70.8849	31.4023	61.9107	40.891	24.6762	97.7915	41.6081	73.5014	58.7871	69.7946	59.9698	86.3157	129.087	54.6806	41.9432	70.6371	37.4883	65.6701	54.7759	67.0268	55.4498	69.9897	47.401	44.3158	66.2429	46.3343	46.7152	54.9976	37.4496	67.1912	41.0757	59.8723	70.7744
feature_7137	Fam132b	3.20108	1.72751	10.1109	7.20482	8.82508	2.95341	2.75076	8.95081	5.59464	2.15318	2.13049	3.34538	1.03961	0.966045	2.09305	1.02732	7.24668	0.92404	4.6467	1.82787	0	11.5578	4.20008	2.59355	5.36881	6.20378	14.3859	10.5809	2.48548	1.90651	3.97956	8.52006	1.99	2.7388	8.51133	2.64046	1.89161	0	3.24262	5.76025	6.35961	0.915984	5.99974	0	4.94053	2.80061	3.74202	10.6646
feature_7149	Fam149b	1317.78	1310.32	1510.2	1404.94	1211.24	1205.97	1383.63	1202.99	1272.78	1291.91	1225.03	1323.65	1250.66	1163.12	1486.07	1505.02	1295.95	1285.34	1343.83	1426.65	1464.43	1474.77	1401.78	1338.27	1477.5	1403.09	1259.25	1170.25	1366.19	1265.92	1243.61	1334.24	1286.54	1262.58	1426.71	1298.23	1367.64	1541.83	1367.3	1400.7	1345.51	1441.76	1506.93	1539.84	1355.68	1431.11	1343.39	1324.35
feature_7163	Fam162a	1004.07	963.952	866.781	1246.43	1078.87	1040.58	1097.55	963.107	1425.7	1204.7	1039.68	1197.65	1534.47	1211.42	1310.25	1126.97	1031.44	1191.09	1137.51	987.962	1045.15	1391.56	974.419	1097.07	705.462	738.249	800.818	780.87	964.368	955.16	1097.36	770.214	1446.73	1132.95	904.329	685.641	1010.12	890.277	824.706	713.311	853.096	979.187	1027.96	830.5	920.915	776.704	818.567	822.147
feature_7169	Fam167a	818.411	1013.19	670.078	697.967	596.796	767.886	714.28	656.094	553.869	510.304	717.975	643.428	627.927	554.51	476.17	541.397	495.19	454.628	525.077	547.446	651.536	769.749	548.111	573.174	585.201	736.181	570.643	552.323	522.78	643.446	665.581	529.096	581.081	494.809	759.637	587.063	499.386	500.727	513.415	517.462	491.507	468.068	503.978	515.483	442.671	531.183	596.852	584.616
feature_7177	Fam171a1	2479.77	2391.74	2278.63	2557.71	2608.91	2433.61	2536.2	2506.23	2467.24	2541.83	2778.16	2573.71	2758.1	2642.13	2952.25	2960.73	2712.67	2921.81	2820.55	2604.71	2661.15	2688.34	2779.4	2886.62	2737.02	2399.83	2657.56	2524.6	2642.07	2532.79	2692.17	2769.02	2414.87	2675.8	2777.89	2695.03	2836.47	2965.58	3222.08	2795.64	2797.32	2652.69	2983.87	2826.34	2720.26	2896.77	2532.41	2481.95
feature_7182	Fam173b	230.478	235.805	227.036	215.244	143.408	184.096	220.061	183.492	196.745	139.957	182.157	209.644	234.953	208.666	277.33	307.168	268.127	223.618	216.536	215.688	261.592	134.07	231.004	200.568	260.924	219.2	219.625	229.606	225.351	253.565	181.07	209.594	250.74	234.623	228.742	242.923	244.018	307.676	215.094	340.815	249.842	226.248	320.986	289.684	193.669	292.197	264.748	277.281
feature_7184	Fam174b	902.706	871.53	741.773	997.868	874.786	711.771	862.821	813.628	774.858	837.587	829.826	799.545	999.069	907.116	872.804	1035.54	950.523	937.901	965.584	998.929	794.556	878.392	954.469	902.555	860.084	742.385	773.005	735.373	771.328	885.573	769.05	978.955	943.261	883.718	838.366	777.177	986.476	832.534	953.33	772.834	884.894	997.506	1253.95	801.862	973.284	969.013	881.246	1000.54
feature_7191	Fam179b	3356.87	2888.4	2679.39	2840.5	2650.83	3358.02	3068.01	2732.68	3316.69	3172.71	2783.48	2956.2	3843.45	3905.72	3683.78	3385.01	3135.4	3002.21	3226.67	3038.83	2886.07	3303.22	2751.05	3199.57	2942.11	2950.93	3025.84	2670.62	3366.17	3047.55	3205.53	2889.15	3143.21	2756.14	2649.15	3656.16	3174.13	3301.7	3604.71	3757.6	3056.25	3020	2701.88	2932.08	2724.21	3234.71	3097.46	3307.01
feature_7241	Fam214a	1568.53	1763.79	1599.36	1504.01	1639.26	1864.58	1864.1	1744.51	1819.19	1629.96	1680.96	1861.15	1253.77	1638.41	1494.44	1473.17	1632.92	1423.95	1454.42	1446.76	1823.81	1548.74	1484.73	1719.52	1798.55	1868.37	1788.65	1767.01	2093.61	1699.65	1576.9	1745.76	1723.34	1619.54	1730.99	1707.5	1351.56	1342.74	1565.1	1830.8	1664.4	1384.05	1297.94	1750.22	1761.79	1790.53	1769.98	1632.66
feature_7253	Fam222a	251.819	470.747	408.113	398.066	312.187	263.838	331.008	349.977	274.137	312.211	456.99	366.876	296.29	294.644	595.474	584.544	326.101	339.123	436.79	372.885	418.059	291.256	471.459	282.697	431.653	301.917	316.491	387.261	332.226	341.265	288.518	484.792	339.295	419.036	435.142	469.123	462.499	404.201	492.878	612.507	409.74	458.908	544.976	448.294	541.482	347.276	477.108	438.22
feature_7255	Fam227a	323.31	532.074	580.918	434.991	294.537	507.986	454.792	317.754	331.016	332.666	305.725	524.109	307.726	320.727	419.657	320.523	332.139	313.25	384.747	359.176	464.51	286.633	252.005	352.723	297.432	529.389	355.812	366.099	391.878	399.413	389.002	323.762	400.986	325.004	453.229	391.669	284.688	338.702	318.857	384.017	231.671	294.947	273.988	326.032	297.42	323.004	430.332	300.549
feature_7258	Fam228b	104.569	132.155	161.775	102.669	102.592	85.6488	114.615	136.947	114.69	130.267	108.655	134.93	100.843	100.469	76.3965	109.923	78.5057	100.72	85.4993	98.7048	130.796	90.1508	101.852	99.4194	90.1961	126.143	169.754	85.7053	105.219	131.549	128.341	127.801	126.365	106.813	121.287	105.619	109.714	76.7034	101.602	105.605	121.741	87.9345	83.9964	105.74	126.478	141.898	98.228	114.403
feature_7271	Fam43a	1819.28	4063.11	1913.72	1621.99	1502.47	1706.09	2148.34	1558.34	2153.94	1142.26	3029.56	3001.92	3427.61	1781.39	4563.91	4241.8	2908.33	1411.93	3640.22	2315.91	3136.66	2434.07	2810.9	2704.21	1168.25	1089.8	842.057	961.804	1316.48	1366.97	1287.39	995.143	1758.17	1353.88	1492.68	967.29	2052.4	1151.41	1230.03	2293.54	1048.43	1490.31	1198.95	1093.75	1005.89	976.481	1427.58	1172.14
feature_7274	Fam46a	839.751	642.635	655.371	744.799	702.697	752.134	624.422	710.694	1058.32	980.773	742.475	580.981	1064.56	1387.24	947.107	857.81	745.2	1046.01	756.483	662.602	605.085	843.719	699.314	778.929	1032.96	911.955	1142.24	1123.69	1424.18	1423.21	1144.12	1171.51	1139.28	936.668	1157.54	1406.49	1315.62	1327.23	1399.73	1459.26	1333.7	1249.4	1611.93	969.284	914.986	1212.67	1293.8	1187.65
feature_7282	Fam50a	1280.43	1371.65	1389.79	1275.25	1511.3	1574.17	1470.74	1416.02	1463.93	1479.23	1276.16	1552.26	1340.06	1212.39	1300.83	1034.51	1201.74	1291.81	1221.15	1225.58	1377.64	1407.74	1050.02	1367.66	1240.2	1544.74	1456.82	1244.31	1467.26	1302.14	1346.09	1181.73	1372.11	1294.54	1373.52	1159.16	1128.35	1167.79	945.764	1108.85	1093.85	1290.62	1055.95	1092.65	1221.3	1049.3	1228.32	970.482
feature_7292	Fam63b	4794.16	4251.41	3785.16	4072.53	3848.84	4922.35	4129.8	4255.21	4573.62	4394.64	4414.37	4168.34	4799.9	5032.13	5167.75	4648.61	4392.7	4207.15	4637.41	3919.86	4181.81	4500.6	3685.57	4681.35	3627.17	3337.63	3982.03	3532.96	4164.84	3919.78	3995.48	3680.67	4163.09	3705.59	4004.58	4576.81	4058.46	3788.63	4486.7	4921.17	4024.72	3951.55	3807.83	3654.64	3552.24	4123.44	4408.1	4495.63
feature_7303	Fam71e1	162.188	275.538	259.207	199.033	207.389	238.242	258.571	307.908	169.704	194.863	252.463	254.249	172.576	140.076	175.817	241.42	158.219	149.694	195.161	210.205	202.917	113.266	180.604	192.787	274.883	267.796	215.789	298.381	178.955	176.352	219.871	266.678	205.965	272.967	208.528	177.791	234.56	168.058	194.557	191.048	150.814	218.004	182.992	252.234	295.444	216.581	199.263	207.476
feature_7310	Fam76a	2593.95	2674.19	2443.16	3098.97	3079.95	2901.23	2704.91	2844.57	2501.74	2824.97	2694	2851.38	2473.24	2446.99	2260.5	2191.27	2411.94	2472.73	2413.5	2216.29	2223.53	2494.17	2316.34	2569.34	2511.53	2790.67	2838.83	2564.81	2857.48	2630.03	2857.32	2653.15	2573.07	2826.44	2731.07	2771.61	2370.19	2604.47	2464.39	2145.69	2433	2398.05	2370.9	2564.2	2794.36	2714.73	2642.8	2444.14
feature_7311	Fam76b	670.094	830.07	825.418	679.955	573.63	853.535	790.384	734.861	766.466	811.749	701.996	857.532	636.244	677.197	797.454	593.79	736.746	685.638	702.581	637.925	825.116	617.186	664.663	697.664	646.405	935.736	771.087	622.157	772.985	668.231	709.356	621.113	779.086	589.754	716.016	733.169	564.647	611.042	602.046	729.632	613.248	622.869	573.975	593.686	665.983	675.882	826.986	641.818
feature_7318	Fam83d	58.6865	40.5966	18.3835	30.6205	35.3003	63.9905	50.4305	33.118	68.0681	53.8295	89.4805	80.2891	91.486	50.2343	81.6291	60.6118	67.6357	36.0376	60.4071	66.7171	48.8958	30.0503	40.9508	44.9548	33.2866	26.883	23.0175	25.3942	33.9683	50.5224	48.7496	36.6363	50.7451	63.9052	35.1093	28.165	48.2361	17.2367	54.0436	47.042	31.798	59.539	48.9979	28.6379	30.6313	27.0726	27.1296	31.9939
feature_7323	Fam84a	1328.45	1181.62	1221.58	1643.6	1399.88	1488.52	1488.16	1327.4	1604.73	1400.64	1357.12	1300.24	1619.72	1453.9	1417	1532.76	1494.02	1573.64	1614.26	1874.48	1370.3	1389.25	1772.43	1546.62	1664.33	1350.36	1427.09	1328.96	1434.12	1326.93	1251.57	1283.97	1103.46	1363.92	1388.41	1479.54	1743.12	2287.31	1728.32	1519.75	1449.08	1316.27	1237.95	1575.09	1944.59	1144.52	1242.35	1280.73
feature_7348	Fank1	387.331	399.919	335.499	475.518	359.622	343.58	334.675	322.229	400.949	301.445	330.226	360.186	302.528	322.659	272.097	310.25	312.815	301.237	287.166	321.704	334.936	471.558	262.505	349.265	339.309	378.43	307.859	349.17	341.34	383.208	396.961	449.859	341.285	370.65	430.886	377.586	328.195	336.978	316.696	297.613	323.431	407.613	336.985	331.539	356.706	342.609	335.846	366.476
feature_7354	Farp2	423.61	406.829	429.254	290.895	264.752	328.813	377.771	374.144	337.543	300.369	321.704	316.696	318.122	379.656	354.773	372.916	398.567	342.819	450.73	434.118	427.838	376.784	362.257	435.716	454.202	367.057	326.081	299.439	328.084	350.797	375.073	391.923	316.41	348.74	347.901	373.186	363.19	358.524	423.702	468.5	418.826	451.58	400.983	406.438	347.813	504.111	343.33	413.012
feature_7356	Farsa	870.695	1222.22	1285.92	1012.28	1195.8	1068.15	1074.63	1053.51	925.913	1023.84	1102.53	1126.28	1079.12	868.474	1139.67	1011.91	921.536	924.964	865.215	1008.98	1012.14	811.357	1052.12	896.503	1269.19	1201.46	992.63	1277.11	1149.12	1225.88	1149.1	1232.85	1088.53	1112.86	1193.71	955.848	1046.06	1036.79	1068.98	1030.12	1096.58	1049.72	1117.95	1223.72	1160.04	1020.36	1108.57	1162.45
feature_7361	Fastk	1092.64	1407.06	1652.68	965.446	1248.75	1147.89	1282.77	1296.08	1020.09	1107.81	1274.03	1383.87	1095.75	849.153	1085.25	1136.21	1007.29	1033.08	953.503	1051.02	1289.63	908.443	1336.68	1011.48	1507.56	1439.28	1358.03	1583.96	1122.61	1328.84	1228.69	1363.21	1045.75	1250.72	1329.9	1208.45	1227.66	1136.76	1131.67	1302.78	1127.47	1083.61	1244.95	1464.94	1421.88	1107.18	1366.77	1344.71
feature_7366	Fat1	2778.54	2730.33	2327.35	2132.63	2270.25	2308.58	2072.24	2092.7	2084	2806.67	2803.72	2349.57	1936.8	2553.26	3473.42	3489.8	2456.62	2201.99	2757.35	2385.37	2166.08	1978.69	2370.95	2259.85	2216.25	1927.31	2379.44	3019.79	2376.12	2550.91	2472.3	2803.95	2316.36	2212.95	2462.97	3825.15	2814.72	2798.38	3589.58	4455.55	3025.36	2364.15	2479.89	4109.54	2618.48	3241.24	3244.33	3495.09
feature_7368	Fat3	2837.23	2409.88	2479.93	2376.69	2067.28	2261.33	2393.16	2206.37	2033.65	2115.5	2315.84	1987.15	1954.47	2403.52	2053.29	2665.89	2660.74	2475.5	2996.19	2353.38	2293.21	2163.62	2256.49	2319.5	2208.73	2085.5	2564.53	2173.32	1826	2081.91	2076.33	2337.05	1965.13	1823.12	1820.36	2636.94	2261.42	2788.9	2839.45	3025.09	2432.1	2133.33	2101.91	3181.01	2268.69	3096.55	2531.48	2508.13
feature_7381	Fbn1	680.764	704.825	719.713	418.78	503.03	553.272	474.964	506.616	400.949	438.172	556.058	563.139	468.866	317.829	367.331	453.047	596.643	395.489	503.702	503.577	573.303	323.618	684.613	541.187	510.037	743.419	623.391	572.427	563.376	531.915	611.857	437.931	454.716	398.038	510.68	530.733	556.134	473.148	407.489	587.545	529.664	387.461	315.986	562.845	545.434	510.645	553.819	526.445
feature_7388	Fbxl12os	73.6249	50.0979	45.9587	104.47	48.5379	67.9284	51.3475	55.495	87.6494	74.2847	71.3714	65.7924	69.6541	79.2157	51.2798	63.6937	64.0123	81.3155	107.803	82.254	77.0108	99.397	80.8516	82.129	78.3847	48.5963	68.0935	29.6265	58.8231	48.6159	54.7189	85.2006	72.6351	49.2983	73.4103	52.8093	87.0142	59.4667	60.5289	86.4037	72.6812	99.8422	77.9966	50.6671	75.096	89.6197	76.7114	68.8354
feature_7389	Fbxl13	65.0887	77.7381	67.0997	51.3344	65.085	51.1924	34.8429	70.7114	105.366	107.659	67.1104	102.592	88.3672	86.944	56.5125	58.5571	50.7268	57.2905	30.6682	46.6106	57.4525	85.5277	27.3005	63.1097	38.6555	97.1925	80.5613	96.2862	47.2242	93.4188	112.423	62.1965	74.6251	74.8604	93.6247	94.1766	71.8813	86.1836	52.9628	68.163	65.4131	53.1271	22.999	47.3627	83.989	48.544	66.4209	69.8049
feature_7398	Fbxl21	877.097	1306	753.723	565.579	804.186	1335.92	1283.69	935.359	880.223	705.166	952.329	1401.71	781.79	407.671	822.571	700.631	478.281	378.856	620.799	436.86	415.614	351.357	457.809	520.439	488.562	588.325	487.204	267.697	599.83	547.168	648.668	299.054	681.576	444.598	367.051	471.763	403.859	342.149	396.68	373.456	349.778	262.887	288.987	308.408	335.956	382.751	415.364	344.177
feature_7402	Fbxl5	3856.24	3765.11	3512.16	3889.7	3589.6	4377.93	4107.8	3834.53	4270.57	3974.77	3728.36	4101.43	4564.94	4433.18	4494.84	3769.23	3908.38	3713.72	3754.53	3708.74	3915.33	4086.84	3350.62	4263.79	3659.38	3838.07	3562.92	3255.74	3978.43	3791.09	3745.76	3603.13	4278.51	3772.23	3538.59	3875.32	3663.11	3688.66	3748.47	3967.85	3537.76	3692.33	3684.84	3184.32	3363.51	3694.94	3631.63	3583.32
feature_7410	Fbxo17	104.569	182.253	155.34	205.337	186.43	140.779	135.704	153.954	131.474	124.884	102.263	156.118	125.793	90.8082	91.0479	121.224	142.518	137.682	104.086	142.574	144.242	104.02	151.203	143.51	122.409	168.536	128.514	141.784	144.158	120.11	146.249	138.877	123.38	140.591	136.181	118.821	83.231	113.762	101.602	92.164	139.003	132.818	113.995	139.885	165.014	118.559	132.842	133.793
feature_7414	Fbxo22	1602.68	1636.82	1532.26	1828.22	1778.25	1609.61	1629.36	1715.87	1862.08	1775.3	1634.09	1657.08	1949.28	1838.38	1778.05	1920.06	1798.38	1635.55	1759.24	1896.41	1697.91	1967.14	1680.03	1732.49	1727.68	1721.55	1660.14	1641.1	1729.07	1599.56	1682.36	1744.91	1725.33	1693.49	1741.63	1651.17	1832.03	1736.6	1732.64	1661.83	1781.6	1888.76	1810.92	1743.61	1764.76	1714.91	1514.58	1617.15
feature_7418	Fbxo28	2388.01	2656.91	2252.9	2210.98	2199.65	2697.45	2545.37	2258.29	2245.32	2275.91	2258.32	2391.95	2559.53	2230.6	2253.17	2371.05	2205.41	2092.03	2178.37	1960.39	2073.18	2207.54	2143.09	2285.78	2151.82	1993.48	2048.56	1959.58	2258.48	2208.69	2143.99	1949.39	2042.74	2053.18	1833.13	2262	2112.93	2016.7	2211.47	2277.22	1991.47	2036.23	2077.91	1902.22	1951.51	1908.15	1900.95	2035.98
feature_7434	Fbxo45	1948.39	1780.2	1700.47	2072.29	1932.69	1916.76	2059.4	1978.13	2237.86	2272.68	1792.81	1849.99	2153.04	2202.58	1923.52	2189.21	2200.57	2227.86	2063.13	2200.75	1930.16	1944.02	1950.94	1971.96	2119.61	1797.03	1882.64	1736.33	2140	1969.42	2004.7	2009.88	2089.5	1877.9	1921.43	1981.23	2045.78	2108.91	2262.27	1970.97	1935.14	1949.21	2227.9	1970.51	1789.46	2092.06	1847.62	2000.1
feature_7464	Fbxw9	389.465	519.118	644.341	450.301	388.304	406.586	433.703	444.855	355.26	399.415	526.231	466.123	337.875	313.965	396.634	297.922	344.217	308.629	328.986	337.241	405.835	272.764	410.558	304.31	452.054	506.642	416.233	575.601	396.849	493.785	459.639	512.056	354.221	455.553	535.15	474.404	356.569	372.313	373.982	458.9	396.113	343.494	469.98	465.917	490.1	399.554	483.656	463.427
feature_7478	Fchsd1	496.168	637.452	665.482	606.106	453.389	361.3	463.961	528.098	442.909	531.835	616.777	520.764	350.35	368.063	556.753	500.304	496.398	353.907	395.899	377.454	514.628	450.754	469.359	452.142	616.34	674.144	445.005	617.925	443.245	475.674	464.613	580.216	401.981	494.809	554.301	484.965	438.854	530.891	413.974	517.462	506.952	436.924	521.977	632.237	483.184	576.927	654.853	593.342
feature_7506	Fermt2	3304.59	2567.95	2836.57	2579.33	2639.8	2743.72	2749.84	2698.67	2796.39	2631.19	2993.34	2613.86	2547.05	2995.7	2710.51	2554.94	2768.23	3070.59	3445.99	2484.07	3137.89	3340.2	2639.75	3064.71	2166.85	2727.59	3034.48	2731.99	2425	2424.12	2877.22	2711.94	2615.86	2657.54	2587.45	2438.03	2304.93	2507.94	2680.56	2507.63	2898.16	2778.18	2712.88	2806.52	2536.47	2910.77	2895.39	2893.03
feature_7508	Fes	116.306	144.247	150.745	108.973	101.488	124.043	127.452	87.7179	111.893	65.672	153.395	120.434	97.7237	82.1138	144.421	93.4859	140.102	78.5434	136.613	116.983	166.246	127.136	141.753	113.252	146.032	185.079	128.514	158.713	124.274	126.783	105.458	117.577	145.27	115.942	130.862	110.9	136.196	114.624	129.705	150.727	123.558	155.717	135.994	187.248	149.204	129.762	155.294	133.793
feature_7512	Fez2	1566.4	1342.28	1476.19	1558.94	1491.44	1420.59	1410.22	1564.6	1689.58	1561.06	1589.34	1316.96	1454.42	1593.97	1418.04	1418.73	1519.39	1885.04	1669.09	1621.32	1558.55	1851.56	1674.78	1378.9	1450.65	1304.86	1418.45	1655.91	1376.13	1423.21	1494.32	1716.79	1685.53	1683.45	1469.27	1407.37	1535.04	1521.14	1685.08	1444.86	1778.87	1901.58	2112.91	1794.28	1641.24	1608.49	1422.9	1539.59
feature_7526	Fgd6	613.541	439.652	484.405	399.868	357.416	468.607	496.053	442.17	491.396	424.176	494.273	475.044	525.005	605.71	640.475	629.746	522.969	628.347	591.06	407.614	540.298	529.347	472.509	450.413	388.702	385.668	426.783	515.29	453.187	501.411	509.383	557.212	439.791	441.859	446.845	623.15	475.741	497.28	691.759	655.708	485.147	470.816	582.975	552.932	342.873	588.129	520.141	568.135
feature_7527	Fgf1	4510.33	2985.14	3400.02	3216.95	4387.17	3574.61	3643.84	4313.39	4438.41	4157.79	4209.85	3038.72	4037.86	5242.72	4051.11	4444.18	4730.87	5145.98	4409.72	4305.54	3657.4	4477.49	3808.42	4264.66	3171.9	3414.15	3368.23	3753.05	3883.15	3451.73	3657.21	4293.26	3781.01	4013.25	3491.78	3936.93	3939.28	3700.73	4652.08	3796	4998.65	4350.01	4788.79	4526.99	3785.43	4529.53	3773.83	4042.87
feature_7537	Fgf2	59.7536	66.5092	89.1599	47.732	58.4662	77.7731	78.855	59.0753	65.2708	55.9827	90.5458	57.9866	67.5749	58.9287	123.49	106.841	80.9213	48.9741	91.0753	57.5778	39.1166	46.2312	56.7011	49.2774	50.4668	36.1887	48.9122	44.4398	47.2242	64.8212	65.6627	76.6806	66.6651	61.1664	61.7072	86.2552	109.714	72.3943	115.653	100.804	65.4131	49.4631	54.9976	84.8123	34.5837	47.6104	77.6469	94.0427
feature_7544	Fgf5	18.1395	19.0026	10.1109	11.7078	26.4752	20.6739	22.923	14.3213	13.9866	13.9957	6.39147	7.80588	3.11884	6.76231	6.27916	14.3824	10.87	12.0125	8.36406	16.4508	9.77915	2.31156	14.7003	22.4774	28.9916	21.7132	15.345	5.29045	10.7704	21.9248	11.9387	8.52006	9.95001	16.4328	0	4.40077	14.1871	5.17102	7.56611	8.64037	4.54258	12.8238	9.99957	9.91313	10.8692	13.0695	7.48404	7.7561
feature_7548	Fgf9	406.538	254.808	443.042	597.1	504.133	460.732	491.468	472.603	693.735	687.941	476.164	409.251	662.234	759.311	485.589	663.647	515.722	653.296	516.713	614.163	444.951	566.332	533.41	488.452	420.915	406.347	480.491	353.402	436.617	425.151	465.608	547.84	451.731	560.54	325.559	447.119	533.435	592.082	615.017	362.896	537.841	518.447	607.974	479.134	527.648	410.757	317.136	391.683
feature_7552	Fgfr1op	890.968	726.419	719.713	808.741	772.195	865.348	808.722	723.225	888.615	987.233	774.433	901.022	1103.03	999.856	921.991	851.646	803.174	818.699	779.716	920.331	882.568	873.769	815.866	927.626	686.134	847.849	719.297	792.509	794.526	813.125	825.758	644.969	792.021	734.91	777.723	769.255	857.847	833.396	834.434	978.282	704.099	928.808	718.969	615.715	802.342	738.429	800.792	749.433
feature_7555	Fgfr3	3741	4098.52	4981	3680.76	3830.09	3584.45	3799.71	5193.26	4199.71	3459.08	6410.64	4439.32	3670.88	4800.28	5179.26	5623.54	4177.71	4613.73	4287.97	4244.31	3830.98	3559.8	4218.98	3779.66	3592.81	3497.9	4121.09	5354.99	4194.67	4063.72	4875.95	5779.16	4053.64	5721.34	5091.91	4878.7	5680.51	4353.14	6632.24	5309.03	5923.52	4513.97	6076.74	6267.3	4239.96	4421.24	4926.37	4933.85
feature_7572	Fhl4	50.1503	90.6944	38.6053	58.5392	41.9191	49.2235	54.0982	42.0688	81.1223	38.7572	38.3488	54.6412	45.743	42.506	51.2798	48.2839	67.6357	42.5058	69.7005	44.7827	69.6765	80.9046	71.4014	71.7548	68.7208	51.6981	49.8713	67.7178	60.4801	39.0834	62.678	70.7165	57.7101	77.5992	56.3876	45.7681	50.1278	41.3681	35.6688	34.5615	40.8832	49.4631	48.9979	42.9569	59.2863	50.4111	85.131	57.2013
feature_7578	Fibp	995.537	1203.21	1148.97	1272.55	1248.75	1190.22	1206.67	1100.05	1168.35	1240.23	1124.9	1228.87	1172.68	1032.7	1076.88	954.378	984.341	1067.27	1036.21	1112.26	1140.49	924.624	1065.77	1110.9	1114.57	1281.08	1101	1152.26	1091.96	1141.04	1146.11	1077.79	1167.14	1107.39	1285.21	1132.76	952.427	1015.24	918.742	906.279	954.85	1155.97	1060.95	970.385	1143.24	1025.02	986.958	967.574
feature_7589	Firre	1852.36	2257.86	3432.2	1655.31	1466.07	2803.77	2291.38	1976.34	2006.61	2068.13	2184.82	2941.7	1480.41	1933.06	2543.06	1813.22	1802.01	1751.98	1801.99	1439.44	3329.8	1724.42	1869.04	1844.88	1826.47	3807.05	2568.37	2582.8	2506.2	2229.66	2166.87	2272.3	2579.04	1717.22	2489.57	2323.61	2121.44	1995.15	1824.51	2501.87	1833.38	1700.07	1608.93	2359.32	1898.15	1952.96	2669	2439.29
feature_7595	Fkbp10	265.69	293.677	402.598	330.521	403.747	294.356	353.014	331.18	329.151	313.288	476.164	390.294	313.963	307.202	342.214	336.96	295.906	420.438	333.633	302.512	261.592	245.025	263.555	279.239	208.31	316.393	353.894	317.427	278.374	309.807	391.986	390.219	389.046	432.73	410.672	334.459	349.003	349.906	379.386	348.495	344.327	323.342	425.982	460.41	305.325	278.194	327.427	287.945
feature_7603	Fkbp4	7850.13	8008.75	8457.32	10288.5	8415.82	7599.12	8339.38	8170.3	8216.66	8064.73	7725.15	7763.51	10223.6	9929.01	10532.3	10699.5	9379.62	9306.01	8881.7	10091.7	8825.68	9260.1	9894.34	9050.62	10096.6	8486.77	8293.98	8896.42	9526.03	8969.16	8482.43	10192.6	9841.56	9061.76	9475.24	8609.68	11447.1	10946.2	10533.1	10649.7	9908.27	11341.7	12952.4	10423.1	10221	10199.8	9148.3	10149.8
feature_7606	Fkbp7	60.8206	47.5066	66.1805	74.75	79.4257	104.354	60.5166	103.829	87.6494	93.6633	70.3061	62.4471	73.8126	79.2157	49.1868	57.5298	80.9213	62.8347	63.1951	65.8032	95.3467	64.7236	40.9508	57.9226	53.6881	52.7321	68.0935	57.1369	64.6226	58.1485	73.6218	60.4924	116.415	72.1216	82.9855	58.9704	44.4529	53.4339	61.6097	56.6425	58.145	79.6906	62.9973	46.2613	54.3458	41.0757	60.8078	51.3842
feature_7610	Fkrp	2362.4	3063.74	2516.7	2377.59	2522.87	2453.3	2403.24	2576.94	2207.09	2532.14	2551.26	2332.84	2371.36	1986.19	2352.59	2314.55	2361.21	2126.22	2235.06	2313.16	2236.98	2397.09	2586.2	2559.83	2923.86	2541.48	2488.77	2795.47	2766.34	2580.46	2566.81	2795.43	2490.49	2468.57	2680.01	2624.62	2484.63	2414.87	2340.09	2686.2	2518.4	2536.36	2473.89	2928.78	2902.07	2869.7	2638.12	2449.96
feature_7611	Fktn	1545.06	1350.05	1208.71	1404.94	1214.55	1372.35	1314.86	1202.09	1504.03	1540.6	1210.12	1361.57	1483.53	1472.25	1716.3	1531.73	1333.39	1421.17	1725.78	1517.13	1386.19	1278.29	1293.63	1468.81	1395.89	1269.71	1391.6	1338.48	1496.26	1056.2	1246.6	1262.67	1334.3	1188.64	1103.28	1514.75	1317.51	1461.67	1629.96	1718.47	1271.92	1331.84	1269.94	1453.93	1196.6	1473.12	1425.71	1479.48
feature_7622	Flrt1	929.381	859.438	973.405	727.687	835.073	770.839	845.399	939.835	730.1	839.74	947.002	670.191	904.464	886.829	985.829	1058.14	983.133	1078.35	999.04	971.511	811.67	746.633	955.519	811.781	1100.61	899.548	987.835	891.97	818.553	983.758	871.523	846.894	829.831	837.158	840.494	1060.59	1050.79	957.5	1093.84	1170.29	1152	872.933	892.961	1146.62	857.676	1080.1	985.087	1126.57
feature_7623	Flrt2	2675.04	2549.81	1758.38	1772.39	1949.24	2696.46	2452.76	2078.38	2659.32	2365.27	2307.32	2827.96	2823.59	2668.22	4372.39	2781.98	2694.56	2084.63	3190.42	2465.79	2740.61	2755.38	2444.45	2836.48	3172.97	2794.8	3260.81	3047.3	5138.32	3382.14	3778.59	2727.27	3959.11	3006.28	3670.51	4220.34	3479.62	3566.28	3839.26	6682.85	3047.16	4044.07	2907.87	3164.49	3044.35	3985.27	4804.75	4023.48
feature_7626	Flt3	601.804	957.042	653.533	425.085	619.962	792.498	861.904	646.248	465.288	648.107	647.669	776.128	488.619	463.701	521.171	368.807	390.113	312.326	517.642	547.446	689.43	577.89	558.611	515.252	345.752	584.189	384.584	266.639	409.276	444.216	508.388	304.166	541.281	366.086	391.521	256.125	373.594	313.708	339.394	299.533	310.712	297.695	270.988	294.089	360.659	326.738	317.136	294.732
feature_7630	Flywch2	315.84	456.063	540.474	492.63	473.245	437.104	397.026	452.016	473.679	450.015	362.183	517.418	543.718	420.229	348.494	471.539	456.541	358.528	335.492	409.442	386.277	279.699	429.458	338.026	510.037	478.725	430.619	531.161	438.274	472.814	555.148	508.648	509.441	524.936	646.861	454.16	501.278	449.879	434.511	372.496	406.106	436.924	423.982	453.801	524.684	434.095	422.848	452.762
feature_7634	Fmnl2	2571.54	2003.91	1959.68	1955.21	2022.05	2357.8	2078.65	2066.74	2222.94	2111.19	2198.66	1998.31	2137.45	2532	2572.36	2228.25	2275.46	2642.75	2630.03	2242.79	2272.43	2540.4	2037.04	2581.45	1826.47	1970.73	2324.77	2243.15	2207.94	2031.38	2151.95	1969.84	2050.7	1954.59	1863.98	2241.75	2184.81	2062.37	2429.8	2444.27	2382.13	2025.24	2179.91	2354.92	1940.64	2343.18	2362.15	2362.7
feature_7636	Fmo1	497.235	386.963	464.183	439.494	369.55	405.601	364.934	487.819	531.491	333.743	470.838	361.301	453.272	724.534	512.798	407.845	471.034	729.068	567.827	471.59	520.74	737.387	368.557	565.394	309.244	435.298	428.701	453.921	415.904	474.72	427.802	600.664	473.621	499.374	439.398	470.883	505.061	432.642	615.017	480.021	565.097	601.801	785.966	559.541	421.921	557.322	535.109	541.958
feature_7637	Fmo2	27.7427	23.3214	28.4944	36.0241	28.6815	32.4875	45.8459	27.7475	154.785	19.3786	46.8708	44.605	87.3276	97.5705	53.3729	66.7757	65.2201	44.3539	77.1352	70.3729	58.6749	34.6734	29.4006	26.8	34.3604	24.8151	30.69	27.5103	38.1108	34.3171	22.8825	109.057	141.29	101.335	62.7711	32.5657	87.0142	50.8484	39.9923	60.4826	32.7066	43.9672	60.9974	18.7248	32.6075	70.0154	29.0007	46.5366
feature_7648	Fn3k	844.019	750.604	863.104	784.425	722.554	743.274	715.197	655.199	728.236	701.937	678.561	715.911	717.334	803.749	683.382	772.543	858.731	791.902	694.217	1004.41	845.897	843.719	971.269	854.142	907.33	715.502	722.175	863.401	715.819	838.863	671.55	861.378	683.566	726.694	775.595	727.888	816.231	701.535	736.074	714.271	894.888	992.927	889.961	840.413	920.915	723.492	682.919	793.062
feature_7649	Fn3krp	1065.96	952.723	988.112	1083.43	1077.76	1080.95	1121.39	1073.2	1237.35	1042.14	1112.12	1222.18	1367.09	1195	1528.98	1177.31	1212.61	1060.8	1146.81	1228.33	1262.73	1315.28	1173.92	1178.34	1108.12	986.4	1095.25	948.049	1200.49	1136.28	1123.23	1000.26	1093.51	1082.74	1090.51	1020.1	1297.65	1239.32	1244.08	1239.41	1117.47	1103.76	1109.95	993.516	947.593	985.816	1046.83	1105.24
feature_7652	Fnbp4	1962.26	2087.7	2240.95	1881.36	1670.15	2154.02	1891.6	1679.17	1764.18	1770.99	1874.83	2403.1	1438.83	1536.98	1732	1583.1	1933.66	1650.34	1791.77	1762.98	2233.31	1791.46	1781.88	1805.97	2047.67	2768.95	2257.63	2081.26	1994.19	1810.23	1749.02	1763.65	1934.28	1575.72	1798.02	1769.99	1441.41	1609.91	1547.81	1997.85	1442.72	1564.5	1409.94	1626.85	1737.09	1870.81	2151.66	1678.23
feature_7654	Fndc1	181.395	276.402	279.429	280.988	147.82	271.713	317.254	274.79	191.15	123.808	216.245	317.811	162.18	170.99	177.91	216.764	214.985	156.163	180.292	200.151	297.042	173.367	178.503	125.355	208.31	283.306	203.321	290.975	183.926	220.202	203.952	228.338	188.055	171.631	206.4	145.226	154.166	157.716	205.366	208.329	200.782	167.625	209.991	224.698	135.37	277.261	230.134	253.043
feature_7663	Fnip1	2352.8	2381.38	2221.64	1835.43	1719.79	2689.57	2207.02	1903.84	1943.2	2172.56	1897.2	2232.48	2181.11	2137.86	2177.82	1971.42	1961.43	1718.71	2012.95	1759.32	1864.15	1775.28	1696.83	2056.68	1693.32	1981.07	2014.03	1862.24	2142.49	1943.68	1999.73	1592.4	1947.22	1679.79	1610.77	1990.91	1732.72	1599.57	1921.79	2171.61	1564.46	1722.97	1524.93	1479.26	1607.65	1780.26	2183.47	1846.92
feature_7668	Folh1	972.063	752.332	710.522	410.675	750.132	719.647	598.748	864.648	1101.21	1055.06	1144.07	591.017	766.195	1050.09	1117.69	925.613	1219.86	1047.86	1302.01	728.405	925.352	1065.63	1119.32	925.032	566.947	739.283	914.946	596.763	660.31	956.113	582.01	973.843	786.051	886.457	709.633	921.522	907.029	981.632	1010.62	1039.73	913.966	1052.47	791.966	767.717	893.248	815.912	880.31	907.464
feature_7673	Fosb	102.435	82.0569	87.3215	76.5512	54.0536	60.0526	127.452	46.5442	160.38	35.5275	57.5232	56.8714	410.648	183.548	151.746	163.344	78.5057	53.5943	83.6406	71.2868	86.79	34.6734	81.9016	57.9226	76.2372	56.868	51.7894	71.9501	78.707	61.0082	50.7394	34.9323	98.5051	77.5992	47.8763	51.9291	121.063	168.92	92.9551	67.2029	82.6749	44.8832	54.9976	34.1452	28.6551	26.1391	39.2912	36.8415
feature_7701	Foxk2	2590.74	3024.01	3059.01	2793.67	3036.93	2825.43	3065.26	3038.8	2900.82	2694.7	3070.03	3023.11	3284.14	3130.95	3380.28	3302.83	2938.53	2771.2	2709.03	2926.41	2817.62	2986.53	2944.26	3029.26	3084.92	2771.02	2918.43	2876.95	3113.48	3096.17	3085.15	3274.26	3034.75	2987.11	3141.75	3294.42	3169.4	3211.2	3310.71	3269.9	2960.85	2882.6	3248.86	3162.29	2996.92	3209.5	3119.91	2977.37
feature_7709	Foxn4	86.4293	292.813	116.735	72.9488	71.7038	114.198	98.1103	78.7671	16.7839	37.6806	82.0238	104.822	20.7923	14.4907	41.8611	27.7376	36.2334	19.4048	28.8095	15.5369	34.227	55.4774	34.6507	40.6323	15.0327	31.0189	4.79532	8.46472	11.5989	27.6444	31.8365	1.70401	7.96001	6.39052	5.31958	2.64046	9.45807	2.58551	4.32349	9.60042	3.63406	3.66394	0.999957	6.60875	5.92863	2.80061	4.67752	4.84756
feature_7710	Foxo1	1701.91	1673.96	1293.28	1484.19	1483.72	1689.35	1635.78	1575.34	1687.72	1223.01	1859.92	1706.14	1645.71	1942.72	2033.4	1629.33	1665.53	1677.13	2051.98	1633.2	1695.46	1911.66	1315.68	1820.67	1522.6	1297.62	1603.55	1672.84	1680.19	1749.22	1655.5	1531.91	1666.63	1531.9	1736.31	1835.12	1859.46	1546.13	1905.58	1955.6	1627.15	1852.12	1956.92	1538.74	1607.65	1643.96	2135.76	1752.88
feature_7721	Foxred1	967.794	1001.96	1309.82	975.353	1173.74	1138.05	1097.55	1137.65	1077.9	1064.75	1022.63	1111.78	930.454	951.554	960.712	949.242	967.432	912.952	933.057	1083.01	1227.28	906.131	1059.47	930.219	1060.88	1436.17	1105.8	958.63	1100.24	987.571	1037.67	1029.22	1002.96	1104.65	1147.97	1021.86	974.181	1004.04	953.33	905.319	945.764	1057.96	1027.96	919.718	1126.44	1042.76	1036.54	914.251
feature_7722	Foxred2	1261.23	1479.61	1485.39	1341.9	1731.92	1684.43	1463.4	1555.65	1252.27	1381.26	1551	1638.12	1444.02	1276.15	1590.72	1523.51	1471.08	1178.15	1294.57	1494.28	1062.26	1174.27	1535.13	1354.7	1680.44	1465.13	1547.93	1388.21	1619.71	1502.33	1439.6	1443.3	1368.13	1457.95	1604.39	1632.69	1460.33	1456.5	1307.86	1473.66	1431.82	1308.03	1312.94	1337.17	1508.84	1413.38	1249.83	1289.45
feature_7742	Frmd4a	2131.92	2237.99	2056.19	1954.31	2006.6	2194.38	1997.97	2130.29	1978.64	1973.39	2198.66	2055.18	1996.06	2310.78	2178.87	2297.08	2283.91	2265.75	2231.34	2336.93	2104.96	2205.23	2241.79	2232.18	2181.89	2198.2	2233.66	2306.64	2102.72	2225.85	1908.2	1979.21	1867.62	1913.51	2055.49	2185.42	2143.2	2117.53	2297.94	2235.94	2163.18	1981.27	1929.92	2435.32	2023.64	2203.15	2365.89	1971.02
feature_7745	Frmd6	788.534	777.381	731.663	786.226	680.634	847.628	760.126	748.287	894.21	663.179	872.435	1002.5	947.088	855.916	868.618	944.105	797.135	838.104	877.297	774.101	705.321	966.232	701.414	799.677	708.683	772.37	766.291	700.456	692.621	965.646	947.135	741.245	904.456	847.201	959.653	994.575	943.915	760.14	857.132	829.476	738.623	765.763	703.969	737.977	770.722	828.048	889.665	796.94
feature_7748	Frmpd1	722.378	791.201	711.441	534.958	592.384	459.747	585.911	586.278	626.6	584.588	671.104	625.586	745.403	662.707	937.689	663.647	770.564	692.106	852.205	804.261	836.117	804.422	904.068	783.252	751.634	684.483	670.385	677.178	596.516	706.361	710.351	783.846	575.111	681.96	881.987	902.159	816.231	786.857	869.022	887.078	908.515	775.838	737.968	910.906	766.77	894.33	855.052	970.482
feature_7787	Fubp3	1581.34	1743.06	1567.19	1429.26	1312.73	1626.34	1408.39	1620.1	1438.75	1455.55	1783.22	1774.17	1235.06	1297.4	1541.53	1464.96	1339.43	1232.67	1540.85	1294.13	1474.21	1410.05	1231.67	1222.43	1420.59	1675.02	1630.41	1706.7	1699.24	1404.14	1623.66	1491.01	1545.24	1471.65	1574.6	1441.69	1313.73	1279.83	1409.46	1628.23	1348.24	1371.23	1379.94	1621.35	1299.36	1387.24	1697.94	1512.44
feature_7795	Fus	11841.9	14364.3	11788.4	11951	13819	13566	13010.2	14686.5	12999.1	14386.5	13520.1	13722.7	11207	10295.1	10517.6	12361.7	11554.8	11207.7	11415.1	10241.5	11302.3	11051.6	11401.1	10663.8	13273.9	14963.5	13961.1	12486.5	14354.5	12672.6	12525.7	12355.8	13288.2	12771.9	13106.4	12364.4	10297.9	10609.2	10016.4	11103.8	10364.3	11328.9	8146.65	11202.9	12114.2	11920.3	11954.8	10895.4
feature_7797	Fut10	467.358	464.701	414.548	498.934	528.402	356.378	339.26	442.17	514.707	300.369	665.778	421.518	449.113	600.88	548.38	474.621	503.644	551.652	565.968	534.651	548.855	589.447	394.808	381.252	404.809	384.634	482.409	547.033	564.205	451.842	467.598	538.468	517.401	437.294	495.785	442.718	519.248	508.484	569.62	533.783	662.308	528.523	630.973	570.556	457.493	527.449	580.949	517.72
feature_7803	Fut8	2736.93	2176.67	1989.09	2848.61	2562.58	2601.95	2497.69	2473.11	2559.55	2546.14	2557.65	2408.67	2499.23	2853.7	2772.25	2637.12	2752.53	2972.64	2901.4	2802.12	2679.49	3125.23	2397.2	2894.4	2133.57	2177.53	2396.7	1965.93	2546.79	2275.42	2402.66	2297.86	2503.42	2499.61	2120.39	2290.16	2377.76	2979.37	2536.81	2377.06	2478.43	2665.51	2577.89	2276.71	2670.85	2478.54	2224.63	2336.53
feature_7815	Fxyd6	7950.43	9154.09	9467.49	9949.86	10293.4	9146.7	8463.16	9543.35	7151.81	8908.78	7877.48	8472.73	8986.42	7782.46	8262.33	7875.42	8853.03	7755.47	7859.43	9406.2	7504.28	7156.59	9982.54	8635.65	11538.7	9987.05	9826.56	10057.1	9804.41	9319.01	9346.99	8435.71	8858.5	9735.5	10411.5	9032.15	9560.21	9769.78	8078.44	8503.09	8336.54	9489.59	9205.6	8765.41	11420.5	9284.04	9061.3	8797.36
feature_7819	Fyn	4941.41	5478.81	5448.86	4811.02	5104.21	5144.84	4938.52	5093.01	4990.42	5279.6	5633.01	4748.21	5240.69	5220.51	5754.85	5936.87	5564.24	5271.65	5608.57	5339.2	5223.29	4849.65	5258.5	5249.34	5058.5	5054.01	5129.07	5848.06	5383.56	5337.27	5298.78	5610.46	5158.09	5247.53	5489.81	5329.34	5215.18	5526.96	5682.15	5887.94	5380.23	5880.62	5784.75	5756.22	5579.83	5747.79	5876.84	5559.19
feature_7821	Fzd1	395.867	387.827	524.848	393.563	464.42	435.135	474.964	574.642	581.843	675.022	600.798	547.527	639.363	769.938	635.242	798.226	464.995	587.689	440.507	534.651	426.616	409.146	480.909	474.619	506.816	472.521	490.081	565.02	615.571	691.109	565.097	778.734	500.486	676.482	679.843	753.413	764.212	549.852	945.764	700.83	609.614	599.053	985.957	741.282	493.065	697.353	644.563	666.055
feature_7824	Fzd3	7615.38	6702.75	5609.72	5835.91	5851.03	6995.64	6216.71	6282.57	6281.85	5882.49	6352.05	6343.95	6789.72	7345.8	7715	7607.29	6720.09	6955.25	7339	6541.93	6114.41	6934.68	5554.61	7074.34	5751.07	5537.9	6312.55	5661.84	5940.31	6120.84	6514.54	5789.38	6622.73	5955.05	5761.11	7330.81	6272.59	6545.65	7414.79	7448	6308.73	5701.08	5656.75	5830.02	5208.31	6881.11	6433.47	6259.17
feature_7828	Fzd7	197.4	190.026	183.835	237.759	248.205	196.894	193.47	245.252	263.88	191.633	267.376	210.759	215.2	239.579	211.399	216.764	183.583	295.693	150.553	165.422	184.581	184.925	193.204	191.923	164.286	141.653	199.485	222.199	180.612	187.791	238.773	202.778	222.88	247.405	220.231	212.117	235.506	151.683	242.116	168.007	241.665	199.684	234.99	207.074	160.073	193.242	179.617	188.085
feature_7834	G3bp1	3334.46	3422.2	3040.63	3479.93	3306.1	3132.58	3343.09	3171.27	3170.3	3113.5	3065.77	3178.11	3906.87	3432.36	3916.11	3959.28	3302.07	3287.73	3468.3	3324.89	3181.89	3619.9	3437.77	3368.15	3600.33	3190.81	3443.04	3016.61	3570.81	3569.93	3286.12	3344.98	3559.12	3323.07	3421.56	3330.51	3620.55	3668.84	3594.98	3740.32	3192.52	3379.98	3639.84	3292.26	3268.65	3447.56	3336.95	3523.21
feature_7869	Gabrb1	1497.04	1216.17	1067.16	1130.26	1072.25	1091.78	1047.12	1150.18	1030.35	1069.05	1320.9	1236.67	1245.46	1168.91	1486.07	1562.55	1468.66	1120.86	1331.74	1437.62	1105.04	1312.97	1197.02	1232.8	1252.01	1127.02	1367.62	1021.06	1128.41	1298.33	1192.87	1142.54	1098.48	1007.88	1023.49	1613.32	1175.64	1236.74	1547.81	1774.16	1224.68	1170.63	983.957	1589.4	1053.32	1574.88	1319.06	1423.24
feature_7873	Gabre	1422.35	1806.98	1682.09	1441.87	1573.07	1365.46	1128.73	1353.36	1220.56	775.145	1399.73	1302.47	1308.87	1206.59	1448.39	1373.52	1565.28	1343.55	1320.59	1274.94	1257.84	1343.02	1309.38	1420.4	1647.15	1599.54	1540.26	1490.85	1303.22	1416.53	1433.64	1271.19	1613.89	1405	1224.57	1520.91	1323.18	1571.13	1537	1403.58	1472.7	1253.07	1805.92	1426.39	1497.97	1652.36	1602.52	1754.82
feature_7886	Gadd45b	168.59	221.122	164.532	160.307	201.874	154.562	176.048	247.042	187.42	127.038	178.961	153.887	129.952	138.144	135.002	192.108	243.972	221.77	264.862	190.098	261.592	214.975	319.206	235.148	133.147	140.619	126.596	280.394	130.074	124.876	158.187	120.133	167.16	186.238	191.505	111.78	146.6	124.104	148.08	102.724	199.873	205.18	190.992	187.248	193.669	142.831	239.489	162.878
feature_7887	Gadd45g	800.271	1376.83	1013.85	648.434	903.468	880.115	983.854	891.5	874.629	599.661	1235.68	1242.25	829.612	572.865	945.014	848.565	554.371	492.513	603.142	566.639	778.665	820.603	742.364	602.568	806.396	834.408	628.186	963.92	811.096	853.162	837.697	846.894	1303.45	845.375	1011.78	676.839	777.453	538.648	754.449	876.518	734.08	806.066	781.966	669.687	617.566	688.951	836.341	769.793
feature_7895	Gal3st4	102.435	80.3293	108.463	111.675	97.0759	85.6488	99.0272	123.521	81.1223	76.4379	103.329	97.016	50.9411	66.6571	65.9312	67.803	107.492	134.91	94.7927	101.447	116.127	92.4624	102.902	97.6903	95.5649	103.396	69.0526	106.867	76.2215	101.998	108.443	103.093	55.7201	83.9897	70.2185	52.8093	62.4232	70.6706	73.4993	61.4427	140.82	111.75	136.994	70.4934	63.2388	96.1544	95.4215	100.829
feature_7901	Galns	189.931	293.677	281.267	285.491	335.353	290.418	286.079	286.426	224.718	340.202	329.161	301.084	275.498	209.632	291.981	268.13	237.933	264.275	237.911	233.967	216.364	235.779	242.555	190.194	319.981	347.411	307.859	306.846	319.799	325.059	307.421	328.874	306.46	325.004	367.051	318.616	272.392	316.294	271.299	235.21	255.293	211.592	291.987	252.234	345.837	256.723	318.072	279.22
feature_7917	Galnt9	793.869	1016.64	1132.42	855.573	807.495	744.259	1066.38	941.625	924.98	1112.12	938.48	808.466	1219.47	1045.26	1493.39	1641.65	1158.26	1050.63	1266.69	1293.22	872.789	908.443	1250.57	1003.7	1352.94	964.687	975.367	1164.96	1122.61	1254.48	956.089	1276.31	1242.76	1248.89	1154.35	1037.7	1456.54	1193.64	1426.75	1529.35	1206.51	1119.33	1295.94	1474.85	1154.11	1160.39	1072.09	1327.26
feature_7947	Gas7	7901.34	8770.58	6937.01	7631.71	6922.17	6547.7	9177.44	6332.7	7977.02	6211.92	6048.46	5793.08	7179.57	6840.56	7600.93	7822	8950.86	7328.56	9027.61	8009.71	7994.46	7662.82	8765.57	8163.63	7509.9	7193.28	7026.1	7350.55	6313.96	6635.6	6240.94	6564.71	5941.15	6042.7	5972.83	7306.17	6532.69	7827.2	7441.81	7514.25	7616.99	8113.79	6707.71	7736.65	7125.23	7581.26	7488.72	6854.46
feature_7969	Gbf1	3731.4	4128.76	3846.74	3569.09	3638.14	3833.52	4004.18	3616.13	3637.45	3601.19	4030.89	3853.88	4503.61	4019.71	4980.42	5180.76	4085.92	3659.2	3982.22	4335.7	3779.64	3478.9	4117.13	3679.38	4762.14	4137.92	3826.66	3987.94	4044.71	4237.21	3983.54	4504.56	3934.24	4007.77	4003.52	4711.47	4287.34	4254.02	4939.59	5275.43	4427.2	4130.17	4056.82	4611.81	4016.65	4518.32	4119.96	4420.98
feature_7975	Gbp3	232.612	67.373	138.795	141.395	170.986	333.735	121.95	127.997	228.448	155.029	124.634	326.732	132.031	160.363	98.3736	109.923	60.389	124.745	115.238	115.156	113.683	136.382	88.2017	115.845	62.2782	79.6151	120.842	116.39	145.815	115.344	146.249	168.697	185.07	154.285	96.8164	106.499	123.901	208.564	88.6316	73.9232	104.479	181.365	88.9961	72.6963	112.644	87.7526	87.9375	92.1037
feature_7981	Gbp9	89.6304	44.9153	55.1504	55.8374	75.0132	128.965	77.0212	45.6491	95.1089	61.3656	51.1317	66.9076	45.743	56.0306	47.0937	52.3932	55.5579	39.7337	77.1352	46.6106	75.7884	64.7236	54.6011	46.6839	47.2456	64.1057	71.9297	90.9957	46.3957	49.5692	50.7394	69.8645	120.395	58.4276	31.9175	55.4498	44.4529	65.4996	44.3158	48.0021	50.8769	40.3033	42.9981	46.2613	60.2745	68.1483	53.3238	61.0793
feature_7989	Gcdh	1126.78	1122.02	1115.88	1266.25	1049.08	920.479	1092.97	1054.4	1018.22	966.778	976.829	1050.45	924.217	1159.25	1049.67	1095.12	1085.79	1094.06	1095.69	1172.58	1259.07	1158.09	1137.17	1210.32	1055.51	1108.41	979.204	1163.9	976.795	1078.13	1112.29	1038.6	1248.73	1033.44	1029.87	1016.58	1197.39	1141.07	944.683	1165.49	1181.98	1155.97	1337.94	1059.6	1123.48	1107.18	1124.48	1200.26
feature_8004	Gcnt3	13.8714	29.3677	11.9493	7.20482	14.3408	24.6117	13.7538	8.95081	5.59464	8.61272	13.8482	8.92101	2.07923	0	0	0	0	0	3.71736	0	6.11197	4.62312	2.10004	1.72903	2.14753	10.3396	5.75438	4.23236	3.31398	5.71952	2.98467	0	11.94	6.39052	0	1.76031	0.945807	0	0	0	6.35961	0	0.999957	0	0.988106	0	1.87101	0
feature_8005	Gcnt4	130.177	119.198	127.765	107.172	132.376	131.919	176.048	121.731	167.839	177.637	111.851	200.723	117.476	141.043	129.769	118.142	100.246	137.682	134.754	64.8893	100.236	159.498	100.802	103.742	93.4174	74.4453	87.2748	96.2862	120.96	85.7928	125.356	106.501	131.34	110.465	95.7525	74.8132	114.443	81.0126	98.3594	97.9242	91.7601	98.0103	80.9965	90.3196	71.1436	71.8824	77.6469	86.2866
feature_8016	Gdf10	209.138	397.328	220.602	159.407	219.524	353.424	264.99	268.524	437.314	304.675	416.511	486.195	606.095	445.347	565.125	444.829	500.021	216.225	432.143	338.155	391.166	295.88	351.757	426.206	439.169	296.747	365.403	267.697	846.721	524.289	399.946	485.644	575.111	325.917	804.321	605.547	699.897	343.011	542.598	848.677	331.608	516.615	325.986	353.568	479.231	363.146	507.979	329.634
feature_8017	Gdf11	1421.28	1077.97	1153.56	1318.48	1053.49	1179.39	1090.22	1150.18	1145.97	958.165	1236.75	1146.35	1350.46	1261.65	1541.53	1415.64	1297.16	1266.86	1392.15	1266.71	1307.96	1592.66	1086.77	1296.77	1041.55	1060.85	1030.03	887.737	1208.77	967.552	1050.6	1220.07	1397.98	1038.92	1083.07	1112.52	1154.83	1188.47	1239.76	1341.18	1183.8	1068.95	1072.95	1153.23	1017.75	1425.51	1256.38	1222.56
feature_8029	Gdpd2	832.282	706.553	898.952	733.991	761.163	744.259	647.345	652.514	527.761	722.392	656.191	739.329	467.826	617.303	519.078	583.517	570.072	642.208	611.506	598.626	752.995	767.438	624.762	610.348	584.127	810.627	711.625	848.588	647.883	658.698	657.622	795.774	610.931	640.878	661.756	632.831	537.218	650.687	634.472	594.266	613.248	652.181	694.97	670.788	748.984	698.287	608.078	678.659
feature_8049	Gfod1	1815.01	1954.68	1324.53	1566.15	1432.97	1687.38	1933.78	1551.17	2192.17	1512.61	1705.46	1705.03	2510.67	2168.77	3615.75	3067.57	2374.5	1846.23	2609.59	2307.68	1887.38	1606.53	2030.74	1854.39	2025.12	1469.26	1565.19	1601.95	1976.79	1714.9	1724.14	1596.66	2047.71	1931.76	1651.2	2021.72	2278.45	1971.02	2317.39	2973.25	1797.95	1796.24	1820.92	2079.55	1428.8	1820.4	1751.27	2003.01
feature_8054	Gfra2	3257.64	2550.67	2847.6	3497.94	2742.39	2751.59	3005.66	3813.04	2558.62	2724.85	3012.51	2315	2846.46	3123.22	3235.86	3217.56	3111.24	3529.83	3377.22	3641.11	2857.96	3337.89	3691.87	3179.69	3880.58	3211.49	3597.45	3282.2	2395.18	3091.4	3182.65	3535.83	2847.69	3493.79	3448.15	3495.98	3538.26	3673.15	3583.09	3282.38	3693.11	3073.13	3615.84	3614.99	3438.61	3418.62	3218.14	3310.89
feature_8060	Gga2	1593.07	1848.44	1751.95	1603.97	1724.2	1723.81	1876.02	1750.78	1447.15	1507.23	1702.26	1828.81	1755.91	1461.63	1706.89	1772.12	1686.06	1415.63	1311.3	1656.05	1487.65	1437.79	1687.38	1466.22	1871.57	1914.9	1653.42	1749.02	1680.19	1751.13	1518.2	1802.85	1613.89	1628.67	1572.47	1619.49	1730.83	1841.74	1609.42	1539.91	1510.86	1504.96	1588.93	1683.03	1619.51	1685.97	1620.29	1767.42
feature_8074	Ggt7	2303.71	3271.91	3725.41	2402.81	3041.34	2506.46	2903.88	3037.01	2159.53	2742.07	3638.88	3188.15	2715.47	2309.81	2983.65	2900.12	2436.09	2323.04	2490.63	2617.5	2576.81	2175.18	3040.86	2407.68	3177.26	3028.48	2842.66	3534.02	2803.63	2920.77	2834.44	3278.52	2391.98	3038.24	3081.1	2798.89	2932	2715.65	2695.7	2680.44	2809.13	2352.25	2489.89	3003.68	3000.88	2680.19	2455.7	2732.09
feature_8088	Gigyf2	3366.47	3607.05	3509.41	3209.75	3039.14	3541.14	3495.29	3153.37	3732.56	3277.14	3152.06	3512.65	4028.5	4079.61	4364.02	4153.45	3808.13	3412.48	3603.05	3951.85	3362.81	3779.4	3198.36	3552.3	3882.73	3655.06	3639.64	3157.34	3571.64	3570.89	3406.5	3741.16	3578.03	3338.59	3613.06	4072.48	3777.55	3935.15	4064.08	4629.32	3559.56	3647.45	3335.86	3925.6	3383.27	3878.85	3626.02	3794.67
feature_8110	Gja1	13565.1	9723.31	9676.15	10492	11242.1	11105.8	9601.97	13411.9	13591.2	11329	13213.3	10386.3	10348.3	15807.4	12766.6	11549.1	11804.8	14814.2	13796	10143.7	11507.6	15022.8	10810	13393.1	8712.51	9987.05	12375.8	11630.5	10092.7	10300.9	12300.8	11176.6	9601.76	13161.7	12359.5	11815.2	11197.4	11743.4	13279.6	11457.1	14537.2	13054.6	13459.4	12159	10674.5	11844.7	13272.9	13498.5
feature_8122	Gjb6	4360.94	2849.53	3373.37	3133.2	3503.56	3777.41	3192.71	4035.02	4297.62	2941.24	3800.79	3579.55	3785.23	4898.81	4495.88	3814.43	3825.04	4404.9	4193.18	3652.08	3890.88	4042.92	3937.58	4223.16	2950.7	2910.61	3499.62	3765.74	3724.08	3160.99	3687.06	3996.76	3344.2	3905.52	4160.98	3719.53	4409.35	3413.73	4764.49	3893.93	4772.43	4964.63	5174.78	3778	3205.42	3796.7	3873.93	4078.74
feature_8135	Gkn3	28.8098	51.8254	43.2012	18.9127	35.3003	85.6488	37.5937	21.4819	59.6762	81.8208	113.981	98.1311	49.9015	46.3701	90.0014	57.5298	60.389	70.227	50.1844	47.5245	57.4525	67.0352	44.1009	35.4452	15.0327	14.4755	26.8538	87.8215	37.2823	50.5224	57.7036	57.0844	149.25	60.2535	65.9628	72.1727	104.039	73.2561	75.6611	68.163	59.962	59.539	87.9962	42.9569	32.6075	67.2147	45.8397	45.5671
feature_8136	Gla	760.791	752.332	683.866	808.741	803.082	882.084	738.12	750.078	667.627	753.613	686.018	754.94	711.096	626.963	631.056	547.56	713.798	742.004	715.592	687.278	682.096	702.714	738.164	808.323	638.889	686.551	611.882	612.634	696.764	687.296	679.509	503.536	752.221	616.229	679.843	665.397	597.75	606.733	584.752	544.344	636.869	590.81	616.973	561.744	610.649	592.797	594.046	546.805
feature_8138	Glb1l	474.827	426.696	530.363	356.639	387.2	483.374	379.604	337.445	409.341	400.491	410.119	498.461	353.469	341.014	380.936	337.988	291.075	370.54	428.426	287.889	548.855	397.588	353.857	401.135	350.047	500.438	403.766	401.016	362.881	446.123	455.659	368.067	440.786	329.568	471.315	457.681	357.515	392.997	419.379	318.734	381.576	416.773	329.986	367.887	409.076	377.149	471.495	365.506
feature_8150	Gli3	250.752	131.291	218.763	211.642	230.555	196.894	253.986	230.036	265.745	234.697	341.944	246.443	181.932	319.761	260.585	265.048	259.673	368.692	312.258	182.787	249.368	238.091	199.504	244.658	178.245	175.774	283.883	173.527	202.153	211.622	226.835	229.19	247.755	264.75	224.486	210.357	252.53	258.551	314.534	270.732	258.927	191.441	264.989	349.162	170.942	266.992	249.78	228.805
feature_8176	Gls2	690.367	903.489	1256.51	793.431	806.392	803.327	835.313	805.573	685.343	881.727	874.566	804.006	743.324	768.972	572.451	690.358	742.785	824.244	586.413	829.851	724.88	658.794	773.865	692.477	813.912	808.559	710.666	895.144	793.698	662.511	777.009	706.313	719.386	719.39	687.29	564.179	768.941	643.792	598.804	663.389	799.494	668.668	718.969	637.745	763.806	619.869	533.238	657.33
feature_8188	Glul	59984.1	42401.8	46309.8	40392	44395.7	51836.2	51403.4	60540.6	68902.6	43305.8	56993.8	46596.7	56728.6	70853.6	63673.9	60093	60375.7	72734	66504.5	58075	60771.3	57564.7	61933.4	58360	40680.6	38202.9	45747.3	48640.4	53405.6	44962.1	50593.1	58082.1	57738.9	59260.2	55713.1	52995	67345.2	53255.5	68714.3	60152.4	67936.1	63286.2	67349.1	56155.7	47445.9	52502.2	57758.1	60488.9
feature_8203	Gm10069	129.11	79.4656	79.9681	94.5633	59.5693	81.7109	99.9441	105.62	110.028	71.0549	62.8494	71.3681	96.6841	138.144	163.258	171.562	157.011	149.694	108.733	159.938	101.459	141.005	117.602	97.6903	141.737	135.449	102.62	117.448	96.1054	125.829	80.586	118.429	108.455	108.639	72.3463	107.379	157.004	140.479	142.675	208.329	165.35	84.2705	101.996	127.769	107.704	143.765	109.454	121.189
feature_8261	Gm10516	152.585	136.474	226.117	224.25	153.336	144.717	154.042	143.213	113.758	167.948	148.069	189.571	136.189	134.28	123.49	110.95	153.388	162.631	130.108	148.057	185.804	182.613	147.003	148.697	120.261	176.808	188.935	115.332	122.617	159.193	147.244	97.9807	136.315	125.985	103.2	139.945	118.226	135.308	104.845	125.765	123.558	167.625	120.995	110.146	166.002	127.895	130.035	120.22
feature_8268	Gm10560	170.724	255.672	341.014	181.021	163.264	242.179	222.811	152.164	170.637	136.727	278.029	255.364	137.229	165.194	192.561	237.31	144.934	161.707	147.765	184.615	292.152	159.498	195.304	163.394	212.605	328.8	178.386	177.759	223.694	231.641	160.177	187.441	227.855	166.154	195.761	172.51	173.083	184.433	176.182	180.488	152.631	171.289	135.994	205.973	189.716	160.569	266.619	241.409
feature_8320	Gm11128	21.3406	45.7791	17.4643	21.6145	25.3721	48.239	34.8429	23.2721	91.3791	30.1445	99.0677	102.592	71.7334	65.691	147.56	101.704	18.1167	18.4808	43.679	21.0205	17.1135	20.804	10.5002	21.6129	37.5817	19.6453	37.4035	25.3942	104.39	40.0366	39.7956	46.8603	105.47	56.6018	92.5608	68.6521	76.6103	74.9798	65.9332	146.886	23.6214	15.5717	40.9982	39.6525	35.5718	33.6074	85.131	80.4696
feature_8323	Gm11186	8.53622	11.2288	4.59587	0.900603	2.20627	15.7515	10.0861	8.95081	0.93244	0	3.19573	8.92101	4.15846	1.93209	0	1.02732	4.83112	7.39232	3.71736	0	8.55676	0	4.20008	1.72903	11.8114	6.20378	5.75438	0	8.28495	15.2521	1.98978	6.81605	13.93	5.47759	20.2144	7.04124	3.78323	0.861836	0	2.88012	6.35961	0	0.999957	4.40583	1.97621	2.80061	1.87101	0
feature_8360	Gm11627	58.6865	38.869	89.1599	73.8494	80.5289	59.0682	62.3505	101.144	155.717	116.272	85.2196	56.8714	128.912	150.703	75.35	83.2127	66.4279	116.429	95.722	74.0286	97.7915	85.5277	92.4018	107.2	34.3604	39.2906	74.8069	75.1244	91.1344	118.203	108.443	84.3486	78.6051	100.422	71.2824	70.4124	115.388	80.1508	84.3081	71.0431	115.381	73.2787	84.9963	71.5948	83.0009	45.7434	58.0013	84.3476
feature_8370	Gm11744	35.2119	58.7354	41.3628	42.3283	45.2285	50.2079	57.7659	47.4393	57.8113	51.6763	54.3275	40.1445	33.2676	49.2683	26.1632	35.9561	31.4023	46.202	33.4562	38.3852	48.8958	60.1005	46.2009	27.6645	35.4342	63.0717	46.035	43.3817	38.9392	43.8497	47.7547	68.1605	42.7851	41.9949	67.0268	50.1688	54.8568	37.059	42.154	24.001	54.5109	31.1435	48.9979	29.7394	51.3815	14.9366	43.0332	25.2073
feature_8392	Gm12130	0	0	0.919174	0	0	0.984469	0.916919	0	0	0	0	0	0	5.79627	1.04653	0	9.66224	2.77212	0.92934	0.913933	1.22239	0	3.15006	0	2.14753	0	0.959063	0	0	1.90651	0	0	0	2.7388	0	2.64046	3.78323	1.72367	5.40436	5.76025	0	0	0	3.30438	2.96432	0	2.80651	0
feature_8422	Gm128	5.33514	1.72751	14.7068	25.2169	12.1345	5.90682	6.41843	11.636	5.59464	0	8.52196	1.11513	2.07923	4.83022	0	7.19122	9.66224	8.31636	5.57604	2.7418	9.77915	2.31156	3.15006	7.78064	2.14753	8.2717	9.59063	15.8713	7.45645	3.81301	5.96934	12.7801	3.98001	2.7388	4.25567	6.16108	5.67484	5.17102	9.72785	1.92008	8.17664	11.9078	9.99957	4.40583	14.8216	23.3385	6.54853	6.78659
feature_8430	Gm13003	0	1.72751	11.9493	3.60241	5.51568	4.92235	3.66768	4.4754	1.86488	16.1488	1.06524	1.11513	4.15846	3.86418	1.04653	5.13659	0	5.54424	0.92934	0	1.22239	6.93468	2.10004	0	3.22129	11.3736	3.83625	6.34854	3.31398	3.81301	4.97445	1.70401	3.98001	2.7388	2.12783	2.64046	3.78323	0	0	3.84017	0	0.915984	0	0	1.97621	2.80061	1.87101	3.87805
feature_8454	Gm13157	117.373	132.155	159.017	73.8494	77.2195	108.292	122.867	129.787	138.001	117.348	75.6324	121.549	98.7633	84.0459	46.0472	61.6391	59.1812	112.733	65.0538	88.6515	96.5691	127.136	68.2513	102.877	38.6555	120.974	93.9882	99.4605	78.707	84.8396	90.5349	96.2767	113.43	104.987	64.8989	85.375	63.369	62.9141	74.5802	51.8422	97.2111	114.498	52.9977	53.9715	72.1317	95.2209	54.2593	94.0427
feature_8477	Gm13293	94.9655	93.2857	106.624	50.4338	112.52	90.5712	81.6058	127.997	107.231	80.7442	72.4366	82.5193	38.4657	104.333	93.1409	60.6118	86.9602	138.606	121.744	99.6187	138.131	101.709	101.852	85.5871	90.1961	110.634	130.433	89.9376	85.3349	72.4473	96.5043	81.7926	88.5551	89.4673	74.4742	66.8918	83.231	66.3614	79.9846	89.2839	137.186	92.5144	105.995	143.19	86.9533	105.49	119.745	109.555
feature_8512	Gm14057	61.8876	43.1878	58.8271	63.0422	45.2285	89.5867	44.0121	34.9081	74.5952	38.7572	66.0452	64.6773	91.486	74.3854	109.885	84.2401	50.7268	83.1636	49.255	67.6311	53.7853	60.1005	74.5514	71.7548	40.803	41.3585	51.7894	30.6846	69.5935	56.242	50.7394	51.9724	97.5101	43.8207	70.2185	58.0902	81.3394	57.743	73.4993	69.123	80.8579	70.5308	97.9958	55.0729	58.2982	70.0154	70.1629	68.8354
feature_8520	Gm14169	187.797	169.296	304.247	210.741	164.367	160.468	180.633	162.905	207.934	189.48	120.373	177.305	223.517	236.681	241.748	210.6	216.193	218.997	205.384	274.18	290.93	275.075	244.655	218.723	281.326	287.442	208.117	353.402	177.298	199.23	174.106	198.517	166.165	181.673	219.167	192.754	204.294	199.946	197.8	240.01	228.037	265.635	205.991	256.64	233.193	222.182	217.037	240.439
feature_8537	Gm14379	17.0724	23.3214	6.43422	17.1115	19.8564	9.84469	15.5876	15.2164	7.45952	9.68931	7.45671	14.4966	13.515	7.72836	1.04653	5.13659	10.87	11.0885	16.7281	5.4836	7.33436	6.93468	9.45018	9.50968	19.3277	11.3736	9.59063	7.40663	15.7414	14.2988	16.9131	14.4841	9.95001	8.21639	12.767	13.2023	16.0787	9.4802	7.56611	17.2807	4.54258	10.9918	4.99978	2.20292	14.8216	9.33538	9.35505	11.6342
feature_8540	Gm14403	399.069	307.497	361.235	358.44	444.563	328.813	373.186	314.173	396.287	540.448	335.552	342.344	570.748	430.856	570.357	403.736	415.476	431.527	458.165	455.139	503.626	547.839	390.608	435.716	344.678	375.328	374.035	288.859	371.166	367.956	380.048	352.731	430.836	398.951	387.266	444.478	365.081	425.747	409.651	490.581	407.015	459.824	451.98	421.859	354.73	417.292	397.59	419.799
feature_8568	Gm14634	56.5525	44.9153	54.2313	70.247	59.5693	45.2856	46.7629	34.9081	55.014	43.0636	42.6098	71.3681	56.1392	46.3701	38.7215	43.1473	31.4023	28.6452	42.7496	42.0409	42.7838	30.0503	55.6511	38.9032	52.6144	43.4264	56.5847	37.0331	65.4511	32.4106	42.7802	39.1923	54.7251	56.6018	37.2371	64.2513	42.5613	35.3353	22.6983	42.2418	39.9747	34.8074	21.999	34.1452	42.4885	42.9428	47.7108	47.5061
feature_8579	Gm14827	110.971	166.705	310.681	131.488	103.695	173.267	158.627	113.675	109.095	124.884	150.199	198.492	72.773	109.163	170.584	101.704	128.025	145.074	118.955	97.7909	292.152	147.94	184.804	150.426	138.515	276.068	175.509	157.655	172.327	148.708	91.5298	151.657	136.315	86.7285	167.035	122.342	104.039	114.624	89.7124	162.247	67.2301	102.59	122.995	131.074	179.835	132.562	212.36	147.366
feature_8607	Gm15319	14.9384	15.5476	11.9493	6.30422	0	22.6428	11.003	2.68524	5.59464	5.38295	22.3701	18.9571	10.3961	0	7.32569	4.10927	12.0778	3.69616	3.71736	7.31147	8.55676	11.5578	8.40016	4.32258	5.36881	18.6113	11.5088	17.9875	10.7704	7.62603	3.97956	9.37207	4.97501	0	15.9588	7.04124	4.72903	1.72367	5.40436	6.72029	2.72555	1.83197	0	5.50729	2.96432	9.33538	5.61303	5.81708
feature_8654	Gm16023	40.5471	57.8717	61.5847	44.1295	33.0941	27.5651	33.0091	21.4819	24.2434	21.5318	33.0226	45.7202	40.5449	43.472	37.675	30.8195	45.8956	24.9491	60.4071	52.0942	72.1212	32.3618	31.5006	44.0903	33.2866	40.3245	43.1578	34.917	46.3957	35.2704	45.7649	32.3762	25.87	21.9104	31.9175	23.7642	32.1574	38.7826	29.1836	40.3217	49.0598	34.8074	24.9989	44.0583	17.7859	47.6104	58.0013	30.0549
feature_8685	Gm16548	13.8714	6.04629	8.27257	9.90663	5.51568	19.6894	11.9199	10.741	12.1217	17.2254	0	8.92101	25.9903	15.4567	18.8375	9.24586	25.3634	14.7846	15.7988	7.31147	31.7822	16.1809	12.6002	17.2903	16.1064	6.20378	11.5088	4.23236	7.45645	7.62603	3.97956	13.6321	24.875	14.6069	12.767	29.0451	13.2413	13.7894	27.0218	16.3207	20.8959	32.0594	24.9989	2.20292	17.7859	22.4049	16.8391	15.5122
feature_8724	Gm17660	18.1395	16.4114	26.656	22.5151	18.7533	20.6739	20.1722	17.0065	15.8515	17.2254	8.52196	20.0723	6.23768	12.5586	7.32569	15.4098	2.41556	15.7087	8.36406	9.13933	12.2239	2.31156	10.5002	9.50968	12.8852	15.5094	11.5088	2.11618	20.7124	5.71952	26.862	20.4482	4.97501	14.6069	10.6392	7.04124	11.3497	6.89469	5.40436	4.80021	9.08515	12.8238	3.99983	9.91313	8.89295	14.9366	3.74202	9.69513
feature_8755	Gm19557	0	5.18254	5.51504	3.60241	8.82508	4.92235	4.58459	6.26556	2.79732	2.15318	2.13049	0	0	6.76231	0	1.02732	0	1.84808	0	0	2.44479	0	5.2501	0	5.36881	10.3396	3.83625	5.29045	4.97097	4.76627	0.994889	0	0	9.12932	1.06392	0.880155	3.78323	0.861836	0	2.88012	1.81703	2.74795	0.999957	4.40583	3.95242	0.933538	0.935505	1.93903
feature_8853	Gm21119	7.4692	19.8664	34.9286	3.60241	6.61881	12.7981	9.16919	9.84589	7.45952	6.45954	11.7177	16.7269	12.4754	8.6944	5.23264	10.2732	2.41556	12.9366	14.8694	2.7418	25.6703	9.24624	6.30012	6.05161	8.5901	14.4755	20.1403	15.8713	11.5989	23.8313	4.97445	25.5602	12.935	5.47759	8.51133	6.16108	9.45807	6.03286	2.16175	8.64037	5.45109	10.9918	2.99987	2.20292	5.92863	13.0695	5.61303	16.4817
feature_8897	Gm2518	16.0054	38.0053	22.0602	17.1115	14.3408	28.5496	16.5045	16.1115	12.1217	16.1488	28.7616	14.4966	12.4754	19.3209	24.0701	16.4371	14.4934	6.46828	18.5868	33.8155	37.8942	27.7387	21.0004	16.4258	17.1802	23.7811	29.731	26.4522	13.2559	15.2521	6.96423	25.5602	16.915	14.6069	8.51133	7.92139	24.591	9.4802	15.1322	17.2807	16.3533	16.4877	15.9993	22.0292	16.7978	17.7372	20.5811	29.0854
feature_9010	Gm3985	2.13406	7.77381	6.43422	1.80121	0	9.84469	1.83384	2.68524	3.72976	3.22977	1.06524	6.69076	2.07923	2.89813	14.6514	1.02732	21.74	0.92404	16.7281	2.7418	13.4463	9.24624	8.40016	7.78064	3.22129	4.13585	1.91813	1.05809	2.48548	2.85976	3.97956	2.55602	5.97001	4.56466	2.12783	1.76031	6.62065	5.17102	1.08087	3.84017	8.17664	7.32787	5.99974	4.40583	4.94053	7.46831	1.87101	6.78659
feature_9054	Gm4598	23.4746	31.959	39.5245	27.0181	45.2285	27.5651	14.6707	32.2229	21.4461	36.6041	27.6964	40.1445	10.3961	24.1511	17.791	20.5464	24.1556	14.7846	13.0108	21.9344	17.1135	11.5578	31.5006	24.2065	16.1064	36.1887	27.8128	13.7552	14.0844	28.5976	15.9182	12.7801	17.91	15.5198	28.7258	33.4459	16.0787	15.5131	10.8087	15.3607	24.5299	8.24386	13.9994	11.0146	21.7383	39.2086	22.4521	19.3903
feature_9123	Gm5134	3.20108	2.59127	0	0.900603	0	1.96894	4.58459	1.79016	4.6622	0	1.06524	2.23025	0	0.966045	0	0	0	3.69616	0	0	0	0	0	0	0	1.03396	0.959063	2.11618	4.97097	3.81301	1.98978	2.55602	0	2.7388	1.06392	10.5619	0	2.58551	3.24262	0	0.908515	0	0	0	0.988106	0	0	1.93903
feature_9155	Gm5468	145.116	135.61	148.906	126.985	124.654	120.105	140.289	101.144	98.8386	127.038	100.133	93.6706	120.595	104.333	93.1409	133.551	152.18	91.48	172.857	116.07	150.354	180.302	130.203	155.613	110.598	111.668	75.766	84.6472	76.2215	106.764	89.54	56.2324	88.5551	71.2087	108.52	56.3299	113.497	86.1836	84.3081	95.0441	94.4856	133.734	95.9958	71.5948	117.585	90.5532	73.9049	106.646
feature_9174	Gm5607	2936.46	3293.5	2870.58	1703.94	1761.71	2768.33	2641.64	2524.13	2175.38	1501.84	2930.49	2548.06	2165.52	2573.54	3585.4	2888.82	2967.52	2540.19	3806.58	2733.57	4253.93	3626.84	2846.61	3262.68	2491.13	2600.42	2436.98	2360.6	2368.67	2339.28	2494.19	2302.12	2383.03	2279.59	2360.83	2475.88	2408.97	2085.64	2823.24	3209.42	2781.87	2761.69	2409.9	2879.21	2179.76	2718.46	3236.85	2877.51
feature_9436	Gmeb2	860.025	1049.46	854.832	795.232	740.204	982.5	950.845	914.772	801.898	778.374	900.132	950.087	785.948	659.809	875.943	821.854	769.356	766.953	803.879	888.343	832.45	792.865	892.517	939.729	954.575	972.959	917.823	860.227	824.352	975.178	879.482	854.562	748.241	809.771	864.964	879.275	827.581	806.679	833.353	872.678	830.383	712.635	803.965	842.616	946.605	865.39	907.44	853.171
feature_9446	Gmpr	1297.51	1105.61	1328.21	1220.32	1100.93	1000.22	1135.15	1220.89	1203.78	1174.56	1030.09	1077.21	959.564	1088.73	1111.41	1107.45	1200.53	1465.53	1222.08	1261.23	1246.84	1289.85	1390.23	1298.5	1200.47	1159.07	1077.03	1467.57	1054.67	1117.21	1048.61	1201.33	1211.91	1288.15	1206.48	1036.82	1099.97	1184.16	1087.36	1037.81	1346.42	1410.62	1357.94	1472.65	1341.85	1262.14	1211.48	1290.42
feature_9451	Gna13	3886.12	3243.41	3209.76	3380.86	3255.35	3708.5	3405.44	3712.79	3795.96	3270.68	4260.98	3518.22	3494.14	4351.07	4125.41	3861.69	3568.99	3988.16	4114.19	3416.28	3511.94	3374.88	3262.41	3887.73	2930.3	3178.4	3684.72	3458.9	3618.86	3448.87	3637.32	3569.05	3541.21	3653.55	3413.05	3856.84	3634.74	3518.02	4007.88	3985.13	4136.47	3463.34	4111.82	3804.44	3048.31	3848.98	4131.19	4007.97
feature_9475	Gng12	3070.91	2461.71	2193.15	2173.15	2398.22	2669.88	2569.21	2727.31	2885.9	2334.05	2724.9	2275.97	2329.77	2829.55	2691.67	2505.63	2770.65	3409.71	3243.4	2293.06	2750.39	2662.92	2511.65	2816.59	1939.22	2026.57	2575.08	2593.38	2039.75	2058.07	2360.87	2274.86	2329.3	2264.98	2260.82	2351.77	2211.3	2068.41	2586.53	2430.83	2810.95	2428.27	2738.88	2617.07	2073.05	2525.22	2739.16	2390.82
feature_9481	Gng7	2345.33	1932.22	1891.66	2009.25	2190.83	2037.85	2647.14	2262.76	2353.48	1914.18	1992.01	1945.89	1588.53	1952.38	2270.96	1848.14	2387.78	2261.13	2367.96	2377.14	2570.69	2089.65	2530.55	2361.86	2500.79	2251.97	2624.96	2897.05	2392.69	2348.82	2237.51	2469.11	2128.31	2195.6	2392.75	2511.96	2272.77	2174.41	2440.61	2627.63	2852.74	2825.81	2667.88	2789.99	2484.1	2759.54	2919.71	2498.43
feature_9484	Gngt2	77.8931	38.869	40.4437	48.6326	54.0536	56.1147	69.6858	60.8655	76.4601	47.37	29.8268	46.8353	56.1392	50.2343	36.6285	44.1747	32.6101	79.4674	54.8311	54.836	66.0093	73.9699	66.1513	65.7032	42.9505	59.9698	49.8713	63.4854	53.0237	45.7562	57.7036	75.8286	64.6751	38.3431	50.0041	29.9253	43.5071	47.401	44.3158	32.6414	83.5834	66.8668	50.9978	57.2758	69.1674	81.2178	69.2274	55.2622
feature_9498	Gns	5402.36	6178.45	5106.93	5430.64	6432.38	6155.89	6008.57	5989.88	5516.31	5657.48	6209.31	6416.43	5933.08	5462.02	6109.63	6007.75	5695.89	5549.78	5969.15	5852.83	5333.31	5802.01	5886.41	5581.32	6105.42	5849.13	5796.58	5249.18	5852.49	6011.22	5943.47	5659.88	6041.65	5714.04	6100.5	5828.39	5529.19	5765.69	5808.61	5937.86	5838.12	5475.75	5927.74	5321.15	5840.69	5974.64	5352.96	5389.52
feature_9508	Golm1	553.788	405.966	618.604	459.307	527.299	463.685	482.299	511.091	555.734	472.623	544.34	496.231	505.252	633.725	621.637	544.478	615.968	653.296	585.484	584.917	567.191	533.97	567.011	562.8	457.423	437.366	620.514	532.219	610.601	474.72	578.031	613.445	512.426	529.5	580.899	540.415	630.853	530.029	689.597	523.223	678.661	600.885	602.974	610.208	492.077	601.199	558.496	457.61
feature_9514	Gopc	2025.22	2091.15	1835.59	1983.13	2094.85	2302.67	2065.82	2078.38	1901.25	2478.31	1970.7	2073.02	1945.12	1936.92	2003.05	1963.2	1962.64	2023.65	2071.5	1902.81	2047.51	1957.89	1807.09	1966.77	1893.04	1947.99	2084.04	1888.69	2020.7	1820.71	1911.18	1888.9	2047.71	1892.51	1848.02	2023.48	1697.72	1846.05	1971.51	1849.04	1787.05	1812.73	1795.92	1863.67	1999.93	1870.81	1977.66	1784.87
feature_9526	Gp5	44.8152	58.7354	69.8572	57.6386	48.5379	46.2701	50.4305	61.7606	30.7705	37.6806	55.3927	44.605	37.4261	20.2869	17.791	26.7103	70.0512	32.3414	46.467	51.1803	29.3375	25.4271	36.7507	36.3097	69.7946	44.4604	30.69	65.6016	50.5382	48.6159	41.7854	50.2684	34.8251	40.169	52.1319	28.165	22.6994	35.3353	22.6983	31.6814	46.3343	55.875	41.9982	42.9569	59.2863	38.2751	32.7427	30.0549
feature_9536	Gpatch11	1787.27	1650.64	1941.3	1880.46	1952.55	2067.39	1818.25	1657.69	2079.34	2278.06	1635.15	1787.55	2251.8	2091.49	2116.08	2225.17	2045.98	1787.09	1892.14	2039.9	1805.48	2098.9	1932.04	2061.87	1741.64	1950.05	1845.24	1496.14	2146.63	1890.3	1876.36	1794.33	1881.55	1773.83	1870.37	2002.35	1879.32	2089.95	2102.3	1868.24	1855.19	1865.86	1832.92	1842.74	1768.71	1802.66	1543.58	1901.21
feature_9541	Gpatch8	3034.63	3451.57	3548.93	2527.09	2511.84	3504.71	3274.32	2603.79	2644.4	2648.41	3003.99	3539.41	2282.99	2407.38	3055.86	2686.44	2611.22	2409.9	2735.98	2515.14	3168.45	2367.04	2557.85	2409.41	2840.1	3051.22	2921.31	2870.6	2680.18	2752.04	2845.38	2470.82	2975.05	2413.79	2795.97	2871.95	2425.05	2520.01	2607.07	3203.66	2489.33	2168.13	2094.91	2866	2537.46	2674.59	3063.78	2651.62
feature_9544	Gpbp1l1	1797.94	1817.34	2048.84	1766.08	1899.6	2123.5	2039.23	1881.46	2068.15	1847.43	1971.77	1991.62	2277.79	2089.55	2099.33	1835.82	2041.15	1708.55	1850.32	1905.55	1976.61	2064.22	1718.88	2026.43	1786.74	1933.51	1879.76	1706.7	2144.97	2007.55	1985.8	1821.59	2024.83	1927.2	1979.95	1944.26	1888.78	2057.2	1962.86	1962.33	1868.82	2082.03	1912.92	1676.42	1817.13	1712.11	1896.27	1923.51
feature_9551	Gpcpd1	2229.02	1868.31	2027.7	1911.08	2068.38	2471.02	2244.62	1970.07	2543.7	2292.06	1673.5	2223.56	1908.73	1906.97	1791.65	1629.33	1890.18	1942.33	1869.83	1692.6	2036.51	2008.74	1829.14	2103.37	1754.53	2137.2	2085.96	1904.56	2198.82	2051.4	1963.91	1721.05	1975.08	1611.32	1853.34	1998.83	1597.47	1771.94	1574.83	1598.47	1666.22	1816.4	1234.95	1374.62	1772.66	1594.48	1798.98	1688.89
feature_9554	Gpd2	4694.92	3972.42	3710.71	4016.69	4378.34	4595.5	4491.98	4261.48	4278.03	4489.38	4925.69	4567.56	4439.15	4727.82	4779.49	4586.97	4241.72	4348.53	4402.28	4380.48	3949.56	4357.29	4204.28	4462.63	3980.44	3803.95	4432.79	3744.58	4558.38	4270.58	4057.16	4092.19	4104.38	4131.02	3612	4462.39	4156.82	4687.53	4992.55	4688.84	4190.07	4081.62	4237.82	4542.42	4015.66	4544.46	4132.13	4342.45
feature_9562	Gpld1	8204.38	6923.01	8027.15	6470.83	7544.34	7327.4	6613.73	8396.75	8184.03	5901.87	8090.53	7382.13	7013.24	8701.16	8779.32	7979.18	8031.74	8224.88	7855.71	7553.66	7361.26	7942.52	6726.43	7838.57	7361.72	7770.23	8476.2	8874.2	8396.79	7812.87	8423.73	7961.15	8515.22	8581.56	9419.92	8882.52	9060.83	9038.94	9369.01	8972.55	10124.5	9380.59	9812.57	8410.74	8256.61	8624.96	9317.63	9147.35
feature_9571	Gpr107	2360.27	2624.09	2448.68	2543.3	2679.52	2595.06	2555.45	2593.05	2384.25	2552.59	2629.02	2645.08	2679.09	2552.29	3021.32	3079.9	2636.58	2635.36	2543.6	2515.14	2380	2450.25	2447.6	2483.75	2803.59	2550.79	2639.34	2598.67	2583.25	2503.24	2609.59	2691.49	2777.05	2743.36	2706.6	2871.95	2846.88	2865.61	2774.6	2660.28	2851.83	2433.77	2648.89	2838.46	2701.48	2740.87	2652.16	2840.67
feature_9598	Gpr162	6267.72	7740.12	7227.47	6742.81	6785.38	5860.55	7039.19	7556.27	5306.52	6147.33	6388.27	6686.3	5813.52	4856.31	6263.47	6582.03	6299.78	5558.1	5734.03	6838.96	5981.17	5205.63	7607.4	5827.7	8877.87	7221.2	6700.97	7645.76	6658.61	6563.15	6569.25	7164.52	6432.68	7072.48	7498.49	6007.06	6787.11	6553.4	6215.02	7135.99	7402.58	6451.27	7190.69	7770.79	7138.08	7093.02	6948.93	7046.42
feature_9600	Gpr17	2755.07	2114.48	2138	1918.28	2494.19	2366.66	2207.94	2747	2032.72	2044.44	2731.29	1779.74	2603.19	3030.48	3368.77	3239.13	2661.95	3323.77	2951.58	2560.84	2109.85	2450.25	2762.6	2850.31	2164.71	1850.79	2553.03	2589.15	2226.16	1927.48	2209.65	2809.06	2327.31	2663.93	2306.57	2849.94	3106.03	2956.1	3729.01	2526.83	3201.61	2301.87	3620.84	4040.15	2821.04	3406.48	2738.22	3170.31
feature_9604	Gpr176	1555.73	1607.45	1328.21	1163.58	1298.39	1545.62	1589.94	1382	1409.85	1055.06	1470.04	1667.11	1948.24	1683.82	2681.2	1897.46	1863.6	1360.19	1800.13	1698.09	1770.03	1694.37	1474.23	1840.55	1552.66	994.672	1237.19	1173.42	1520.29	1270.69	1194.86	1290.79	1552.2	1195.94	1353.3	1324.63	1559.64	1344.46	1361.9	1702.15	1347.33	1527.86	1531.93	1103.66	1225.25	1426.45	1621.23	1428.09
feature_9605	Gpr179	660.49	339.456	358.478	624.118	371.757	260.884	241.15	332.075	325.422	226.084	318.508	205.183	165.299	280.153	233.376	279.43	275.374	263.351	393.111	239.45	432.727	316.684	365.407	361.368	328.571	301.917	350.058	449.688	285.831	312.667	326.324	428.559	373.126	247.405	326.622	260.526	247.801	198.222	252.924	300.493	451.532	403.033	358.984	409.743	294.456	464.902	343.33	423.677
feature_9647	Gprc5b	11645.5	9722.44	10133.9	8314.37	9310.46	9263.86	8634.62	10903.9	9607.86	8263.9	12038.3	9198.67	8526.91	10374.4	11167.5	10503.3	10402.6	10591.3	12036.8	8758.22	10562.7	10210.2	10475	10387.2	7861.02	8285.14	9806.42	10119.6	8256.78	8766.12	9375.84	10694.4	9361.97	10226.7	10540.2	10173.7	10294.2	9839.59	10935.2	9922.03	12412.1	10839.8	10834.5	11280	9696.28	10331.5	11115.7	10514.4
feature_9651	Gprin1	2600.35	2567.08	2425.7	3036.83	2839.47	2379.46	3018.5	2734.47	2510.13	2871.27	2591.74	2461.08	3041.91	2773.51	2955.39	3284.34	2960.27	2962.47	2961.81	2988.56	2806.62	2794.67	3008.31	2711.12	3170.82	2616.96	2850.34	2994.39	2893.93	2742.51	3057.3	3121.75	2541.23	2810	2681.07	3003.09	3224.25	3303.42	3478.25	3178.7	3286.1	2809.32	3183.86	3175.51	3040.4	3142.29	2931.87	3045.24
feature_9660	Gpt2	1916.38	1550.44	1973.47	1651.71	1852.16	2059.51	1912.69	1993.34	2620.16	1874.34	2282.82	2044.03	2560.57	3176.36	2842.37	2526.17	2125.69	2390.49	2242.5	2255.59	2147.75	1976.38	2038.09	2144.86	1662.18	1644	1770.43	1955.35	2217.05	2011.36	1801.74	2320.87	2087.51	2183.73	2090.6	2404.58	2911.19	2208.02	2625.44	2419.3	2368.5	2277.14	2659.88	2167.67	1849.73	2088.32	2075.89	2490.68
feature_9670	Gramd1a	2094.58	2843.49	3612.35	2368.59	2450.06	2316.46	2643.48	2547.4	1893.79	2059.52	2731.29	2596.01	1855.71	2031.59	2305.5	2333.04	2124.48	2051.37	1965.55	2167.85	2758.94	2159	2584.1	2034.21	2666.15	3175.3	2580.84	3039.89	2376.95	2431.75	2283.27	2799.69	2069.6	2501.43	2532.12	2268.16	2313.44	2445.89	2339.01	2391.46	2503.87	2292.71	2564.89	3059.85	2739.03	2458.01	2483.77	2390.82
feature_9674	Gramd3	758.657	523.436	530.363	607.006	515.164	606.433	536.397	526.307	642.451	573.822	503.861	544.181	592.58	650.148	566.171	519.823	649.786	796.523	776.928	541.962	704.099	864.523	657.313	747.806	410.177	481.827	563.929	527.987	459.815	505.224	546.194	561.472	584.066	492.07	511.744	434.797	559.918	508.484	587.995	557.784	591.443	667.752	719.969	679.6	464.41	592.797	576.271	691.263
feature_9692	Gria1	26597.8	23707.5	23749.6	21740.6	25292.7	24775.2	23857.3	24750.8	23103.1	21141	25574.4	22828.9	24451.7	25908.4	26779.6	28368.4	26275.3	27240.7	26030.8	25519.8	21945.6	24442.4	25823.2	25246.5	23240.5	23050.1	24621.1	23572.1	24288.1	24118.3	26026.3	27461.9	24102.9	25183.2	25326.5	27130.8	24883.2	26854.8	28910.1	27362.1	27952.3	26940.9	25396.9	28749.2	26234.2	29021.8	25719.8	25583.5
feature_9721	Grk5	543.117	379.189	420.063	471.015	409.263	435.135	579.493	495.875	516.572	600.737	585.885	459.432	615.451	636.623	716.871	520.85	524.176	540.563	581.767	519.114	535.409	568.643	438.909	554.155	542.25	516.981	605.169	370.331	600.659	495.692	538.235	487.348	519.391	508.503	534.086	712.045	541.947	567.95	620.421	813.155	575.999	493.715	469.98	675.194	472.315	614.268	659.531	591.403
feature_9725	Grm3	1479.97	918.173	808.873	801.537	963.037	899.805	1106.72	999.805	887.683	1008.76	1069.51	878.719	903.425	904.218	954.433	992.389	968.639	1217.88	1246.24	976.081	993.806	1051.76	1159.22	1247.5	921.288	840.612	1035.79	944.874	868.262	794.06	907.339	852.006	675.606	860.895	618.136	798.301	820.96	782.547	843.081	816.995	1187.43	849.117	864.962	1101.46	744.044	974.614	917.73	956.909
feature_9742	Gsap	227.277	190.89	267.48	196.331	189.739	237.257	208.141	193.337	227.515	239.003	166.178	241.982	159.061	216.394	166.398	169.507	157.011	231.01	199.808	175.475	223.698	210.352	168.003	249.845	155.696	251.253	221.544	237.012	231.15	186.838	201.963	198.517	226.86	175.283	179.802	174.271	146.6	152.545	166.454	175.688	180.795	168.541	213.991	165.219	185.764	186.708	199.263	230.744
feature_9767	Gss	616.742	830.07	771.187	767.314	642.025	504.048	633.591	597.914	593.964	617.963	705.192	657.924	797.384	528.426	815.245	727.341	702.928	671.777	773.211	743.942	727.324	737.387	705.614	760.774	712.978	691.721	647.368	726.908	644.569	662.511	644.688	696.089	666.651	708.435	738.358	579.142	736.783	630.864	648.524	740.192	690.472	758.435	811.965	745.687	712.424	729.093	728.758	696.11
feature_9793	Gtdc1	792.802	737.648	809.792	756.506	956.418	878.147	935.257	862.858	1001.44	1114.27	703.061	806.236	910.702	909.048	760.825	710.904	788.68	928.66	786.221	870.978	707.766	887.639	842.116	795.355	781.699	813.729	884.256	745.953	788.727	755.93	888.436	774.474	794.011	897.412	739.422	865.192	732.054	796.337	756.611	649.948	774.055	787.746	688.97	665.281	803.33	706.688	689.467	693.202
feature_9807	Gtf2i	12679.5	13781.2	12525.6	12147.3	11052.3	12298	12526.9	11438.2	12540.4	11068.4	12545.4	11852.7	13937.1	13341.1	16495.4	15331.7	13248.1	12855.2	14692.9	13656	14419.4	14315.5	13418.2	13579.8	13212.7	12402.4	12161.9	12809.2	13156.5	13233.1	12612.2	12388.2	13524.1	12111.9	12978.7	13575.5	14483.1	13160.2	14908.5	16357.2	13264.3	13005.1	13648.4	13177.9	12443.2	13096.6	13628.4	13504.3
feature_9870	H1f0	4187.02	4710.06	4036.09	3814.05	4116.9	3920.16	3703.43	4540.74	3548.87	3901.56	3977.62	3654.27	3152.11	3043.04	2931.32	3434.32	3617.3	3382.91	3624.43	3419.02	3342.03	3529.75	3907.13	3334.44	3787.16	3450.33	3307.81	3949.85	3482.99	3750.1	3476.14	3696	3011.87	3744.85	3631.15	3266.26	3047.39	3045.73	3076.16	3051.97	3426.01	3703.32	3279.86	3854	3761.72	3506.37	3380.92	3471.83
feature_9929	H3f3b	14887.2	18544	12701.1	15166.2	15662.3	16340.2	14871.5	15667.5	12583.3	13435.8	14229.5	15475.7	11912.9	10468.1	11556.8	11398.1	13663.6	12330.4	13981	12122.4	13558.8	11839.8	13558.9	13559.9	15976.5	15434	15479.3	13517.1	14883.1	13085.3	15003.9	12468.3	14396.7	13556.1	14769.3	11884.7	11498.2	11542.6	10626.1	12085	12256.8	13311.1	11484.5	12546.7	14655.6	13747.3	14474.1	13011.8
feature_9946	Haghl	2784.94	4012.15	4389.98	3663.65	3707.64	2702.37	3092.77	3500.66	2759.09	3038.14	3675.09	3364.34	2520.02	2422.84	2370.38	2906.28	3143.85	2645.53	2495.28	3099.15	2827.4	2972.66	3678.22	2579.72	4080.3	3605.43	3143.81	4540.26	3258.47	3231.53	3026.45	4103.26	2891.47	3520.27	3630.08	3069.98	2928.22	3405.98	2729.2	2795.64	3331.53	3509.13	3128.86	3673.36	4191.54	3460.63	3037.58	3084.02
feature_9957	Hapln1	148.317	126.972	220.602	214.343	173.192	155.546	183.384	148.583	273.205	175.484	191.744	183.996	194.408	252.138	189.421	172.589	192.037	236.554	182.151	118.811	188.249	127.136	163.803	195.381	81.606	85.8189	124.678	124.855	108.533	133.455	150.228	178.069	140.295	199.019	148.948	141.705	174.028	173.229	152.403	133.446	171.709	129.154	224.99	125.566	155.133	131.629	163.713	151.244
feature_9959	Hapln3	18.1395	34.5503	22.0602	23.4157	31.9909	6.89128	22.0061	22.377	17.7164	21.5318	22.3701	27.8781	23.9111	7.72836	15.6979	17.4644	22.9478	18.4808	26.9509	25.5901	18.3359	32.3618	36.7507	20.7484	28.9916	32.0528	26.8538	27.5103	9.94194	24.7846	15.9182	20.4482	5.97001	25.5621	28.7258	28.165	9.45807	20.6841	37.8305	8.64037	21.8044	20.1516	24.9989	16.5219	47.4291	34.5409	45.8397	35.872
feature_9973	Haus5	167.523	224.577	228.874	155.804	167.677	191.971	223.728	162.905	170.637	179.791	154.46	255.364	156.982	108.197	169.537	160.262	146.141	149.694	184.009	159.938	215.141	224.221	217.354	169.445	198.646	228.506	173.59	235.954	252.691	215.435	228.825	192.553	228.85	194.454	220.231	169.87	146.6	150.821	167.535	176.648	184.429	141.062	154.993	183.944	190.704	168.037	261.006	179.36
feature_10013	Hdac10	267.824	415.467	584.595	245.865	250.412	295.341	294.331	290.901	280.664	307.905	271.637	347.919	200.645	236.681	267.911	216.764	217.4	227.314	210.031	201.979	359.384	272.764	306.606	251.574	324.276	401.178	298.269	424.294	338.026	339.358	302.446	251.342	273.625	290.312	358.54	306.294	305.496	265.446	208.608	298.573	256.201	292.199	251.989	307.307	327.063	276.327	310.588	304.427
feature_10019	Hdac6	1860.9	2419.38	2491.88	2043.47	2092.65	1978.78	1974.13	2013.04	1647.62	1741.92	2391.47	2223.56	1667.54	1598.8	2033.4	1963.2	1977.14	1771.38	1988.79	1950.33	2081.74	1944.02	2024.44	1844.88	2235.57	2351.23	2184.75	2181.78	2047.21	1998.02	2096.23	2204.14	1940.25	2027.62	1973.57	1937.22	1898.23	2099.43	1974.75	2285.86	2079.59	1825.56	2139.91	2271.21	2159.01	2228.36	2182.53	2156.2
feature_10021	Hdac8	956.057	774.789	732.582	763.711	893.539	949.028	812.39	958.631	1060.18	854.812	827.695	798.43	898.226	1008.55	1025.6	922.531	776.602	1123.63	1007.4	879.204	1043.92	1093.37	904.068	1020.99	798.879	766.166	862.198	1006.24	859.149	753.07	798.896	861.378	860.676	932.103	946.886	865.192	880.546	929.06	926.308	852.517	960.301	1068.04	1063.95	894.384	864.593	831.783	944.86	858.019
feature_10037	Heatr5a	893.103	956.178	661.805	759.208	660.778	808.249	787.633	755.448	823.344	719.162	876.696	859.762	1037.53	961.215	1046.53	1038.62	833.368	891.699	991.606	828.023	817.782	1037.89	799.066	842.039	783.847	757.895	818.081	828.484	854.178	889.386	802.876	741.245	988.036	756.82	909.649	987.534	982.693	890.277	1088.44	1072.37	842.194	768.51	939.959	1092.65	723.293	976.481	969.183	925.885
feature_10038	Heatr5b	2436.03	2386.56	2225.32	2111.91	2126.84	2499.57	2264.79	2089.12	2001.95	2199.47	2388.28	2439.9	2940.03	2635.37	3220.16	3171.33	2492.86	2283.3	2668.13	2529.77	2053.62	2091.96	2659.7	2389.52	2528.71	1977.97	2394.78	2259.02	2263.45	2664.34	2198.71	2377.95	2205.92	2188.3	2104.43	3040.06	2771.21	2562.24	3023.2	3055.81	2643.78	2000.51	2184.91	3049.94	2187.67	2539.22	2354.67	2624.47
feature_10045	Hectd2	529.246	486.295	430.173	610.609	426.913	539.489	464.878	434.114	538.018	597.507	410.119	549.757	593.62	548.713	751.407	563.998	469.826	469.412	495.338	440.516	539.076	383.719	421.058	542.916	434.874	476.657	542.83	453.921	583.26	527.149	575.046	389.367	596.006	468.334	555.365	609.947	531.543	598.114	613.936	712.351	385.211	484.555	531.977	517.686	491.089	499.443	610.885	570.074
feature_10052	Helq	298.768	397.328	590.11	316.112	318.806	394.772	412.613	351.767	363.652	396.185	369.64	495.116	304.607	291.746	408.146	382.162	346.633	326.186	381.959	340.897	499.959	247.337	366.457	342.348	368.301	536.627	379.789	370.331	412.59	469.001	404.92	335.69	391.036	325.004	408.544	367.905	342.382	336.116	301.564	413.778	274.372	302.275	323.986	300.698	379.433	343.542	446.236	393.622
feature_10057	Hemk1	368.125	394.737	567.13	437.693	378.375	444.98	383.272	320.439	356.192	305.752	336.617	450.511	255.745	244.409	324.424	361.616	338.178	412.122	351.29	326.274	482.846	284.322	490.36	237.742	279.178	504.574	401.847	429.585	427.503	303.135	423.823	418.335	436.806	310.397	333.006	288.691	310.225	337.84	309.13	321.614	291.633	358.15	338.985	399.829	371.528	296.865	424.719	406.226
feature_10061	Heph	1109.71	667.684	657.209	609.708	724.76	643.843	665.683	722.33	841.993	631.958	759.519	735.983	750.601	949.622	823.617	755.079	799.55	851.965	745.331	774.101	724.88	841.407	655.213	836.852	478.898	521.117	651.204	699.397	657.825	611.036	766.065	663.713	742.271	649.095	771.34	734.929	774.616	754.969	847.404	791.074	801.311	866.521	834.964	737.977	629.423	776.704	799.857	791.122
feature_10068	Herpud1	2218.35	2797.71	2463.39	2536.1	2987.29	2873.67	2995.57	2986.88	2514.79	2390.03	2762.18	3247.25	3065.82	2740.67	3181.44	2722.39	2205.41	2228.78	2209.97	2642.18	2145.3	2209.85	2382.5	2504.5	2770.31	2536.31	2456.16	2209.29	2859.13	2682.46	2644.42	2474.23	2748.19	2737.88	2503.4	2416.91	2923.49	2631.19	2780	2608.43	2387.58	2291.79	2553.89	2148.95	2605.63	2394.53	2122.66	2343.31
feature_10077	Hexa	2103.11	1959.86	2045.16	2455.04	1904.01	1790.75	1830.17	2058.69	1861.15	1637.49	2062.31	1823.23	1858.83	1858.67	2021.89	1915.95	2012.16	2246.34	2033.4	2123.98	2034.06	2052.66	2397.2	2090.4	2117.46	2085.5	1996.77	1941.6	1996.67	1939.87	1877.36	2095.94	2013.88	1904.38	2091.66	1720.7	2243.45	2059.79	2061.22	2070.81	2233.13	2376.06	2739.88	1945.18	2028.58	2096.73	2020.69	2260.9
feature_10078	Hexb	4054.71	2333.87	3112.32	3658.25	4179.78	3406.26	3249.56	3622.39	3897.6	3287.91	3274.56	3287.39	3368.35	4069.95	3055.86	2845.67	4020.7	5113.64	4068.65	4274.47	3610.95	4743.32	3590.02	4534.39	3481.14	3616.8	4267.83	3685.33	3826.82	3351.64	3422.42	3764.16	3506.39	3917.39	3296.01	3031.25	3226.15	2978.51	3447.98	2639.15	4715.19	4391.23	4387.81	3450.87	3300.27	3704.28	3353.79	3407.84
feature_10079	Hexdc	592.201	722.1	937.558	671.85	709.316	742.29	737.203	691.897	629.397	720.239	804.26	762.746	588.421	641.454	642.568	653.374	647.37	603.398	592.919	691.847	754.217	707.337	720.314	595.652	788.142	903.683	772.046	902.551	731.561	700.641	692.443	810.258	680.581	784.208	828.791	775.417	697.06	667.061	581.51	636.508	625.059	726.375	670.971	800.76	818.152	688.018	728.758	734.891
feature_10081	Hexim2	785.333	967.407	990.87	753.805	1006.06	897.836	882.993	1049.93	849.453	868.808	906.523	923.324	847.285	738.058	691.755	865.002	972.263	849.193	828.971	902.966	673.539	739.699	959.719	816.968	1095.24	1018.45	999.344	1103.59	1012.42	959.926	991.905	897.163	916.396	1079.09	980.931	955.848	934.457	938.54	839.838	801.635	922.143	960.867	947.959	881.167	1122.49	971.813	759.63	908.434
feature_10087	Hfm1	69.3568	113.152	186.592	73.8494	100.385	192.956	133.87	112.78	68.0681	148.569	85.2196	163.924	103.961	102.401	106.746	102.732	105.077	90.5559	108.733	74.0286	167.468	152.563	86.1017	100.284	104.155	92.0227	98.7835	113.216	148.301	100.092	138.29	97.9807	116.415	68.4699	102.136	95.0567	77.5561	84.46	83.2272	99.8443	48.1513	70.5308	42.9981	93.624	117.585	97.088	114.132	100.829
feature_10097	Hhip	562.324	446.562	401.679	296.298	420.294	428.244	441.038	560.32	428.922	356.351	584.819	433.784	430.4	513.936	485.589	452.02	487.943	704.119	718.38	534.651	535.409	418.392	480.909	482.4	375.817	416.687	629.145	456.037	523.609	453.749	459.639	427.707	433.821	415.384	405.352	378.467	415.209	383.517	516.657	496.342	566.914	421.353	549.976	615.715	407.1	421.026	618.369	413.012
feature_10106	Hic2	389.465	460.382	375.942	336.825	281.299	317.984	393.358	373.249	265.745	300.369	388.814	317.811	252.626	268.56	391.401	351.343	263.296	280.908	340.138	318.049	298.264	205.729	378.007	280.968	412.325	377.396	426.783	423.236	400.163	353.657	318.365	406.407	322.38	328.655	334.07	326.537	282.796	322.327	401.004	405.138	347.961	285.787	329.986	378.902	329.039	424.76	372.331	386.836
feature_10119	Hint2	481.23	547.622	470.617	627.72	613.343	561.147	475.881	622.081	534.288	603.967	452.729	543.066	544.758	506.207	490.821	420.173	547.124	517.462	459.094	468.848	562.301	573.267	553.361	526.49	560.504	562.476	564.888	514.232	614.743	511.897	552.164	576.808	633.816	597.97	545.789	499.928	544.785	594.667	433.43	411.858	479.696	626.533	513.978	350.264	542.47	469.57	494.882	513.842
feature_10121	Hip1	1470.36	1014.91	1290.52	989.763	1137.33	1402.87	1240.59	1241.48	1482.58	1203.63	1353.93	1141.89	1370.21	1683.82	1458.86	1435.16	1306.82	1705.78	1519.47	1472.35	1387.42	1359.2	1492.08	1306.28	1115.64	1238.69	1391.6	1107.82	1316.48	1269.73	1097.36	1494.42	1357.18	1368.48	1252.23	1393.29	1547.34	1422.03	1767.23	1352.7	1575.37	1296.12	1310.94	1752.42	1312.2	1598.22	1386.42	1442.64
feature_10133	Hist1h1e	69.3568	42.3241	42.282	34.2229	37.5066	42.3322	29.3414	26.8524	34.5003	11.8425	35.1531	20.0723	20.7923	28.0153	36.6285	33.9015	43.4801	30.4933	61.3364	42.0409	22.0031	94.7739	53.551	31.9871	24.6965	39.2906	35.4853	45.4979	37.2823	62.9147	25.8671	32.3762	22.885	19.1716	17.0227	28.165	35.9407	26.7169	20.5366	32.6414	59.0535	35.7234	54.9976	47.3627	42.4885	57.8794	32.7427	62.0488
feature_10164	Hist1h3b	0	0	0	0	0	0	0	0	0	0	0	0	0	0	0	1.02732	0	3.69616	3.71736	0	0	0	1.05002	1.72903	0	0	0	0	0	0	0	0.852006	0	0	1.06392	1.76031	2.83742	2.58551	1.08087	1.92008	0	0	6.9997	4.40583	0	0.933538	0	2.90854
feature_10176	Hist1h4f	0	0	0	0	0	0	0	0	3.72976	4.30636	0	0	1.03961	0	0	0	2.41556	0.92404	8.36406	0	0	0	0	0	0	0	0.959063	0	0	0.953254	0	3.40803	0.995001	3.65173	0	1.76031	7.56645	0	6.48524	1.92008	1.81703	0	2.99987	0	0	0	0.935505	1.93903
feature_10178	Hist1h4i	128.043	154.612	137.876	119.78	101.488	78.7575	93.5257	97.5638	143.596	71.0549	101.198	122.664	106.041	138.144	101.513	119.169	128.025	138.606	127.32	122.467	136.908	152.563	126.002	97.6903	140.663	102.362	122.76	175.643	111.847	203.996	102.474	155.917	139.3	110.465	112.775	138.184	127.684	143.065	141.594	117.125	139.911	161.213	181.992	190.552	113.632	164.303	130.971	166.756
feature_10198	Hivep2	3066.64	2431.47	3042.47	2346.07	2426.9	2912.06	3573.23	2531.29	2870.98	3451.55	2992.27	2774.43	3023.2	3131.92	3407.49	3584.31	2663.15	2868.22	2611.44	3056.19	2375.11	2494.17	2587.25	2497.59	2796.08	2339.86	2930.9	2578.57	2799.48	2811.14	2816.53	3175.43	2580.04	2664.85	2410.84	3387.72	3142.92	2907.84	3522.56	3800.8	2931.78	2655.44	2395.9	3431.04	2415.92	3020	2580.12	2992.89
feature_10204	Hk3	37.346	46.6428	68.9381	37.8253	50.7442	20.6739	41.2613	47.4393	43.8247	20.4552	29.8268	35.684	31.1884	39.6078	32.4424	32.8742	49.519	59.1386	54.8311	31.9877	35.4494	78.593	38.8508	47.5484	47.2456	41.3585	54.6666	49.7302	38.9392	66.7277	35.816	66.4565	44.7751	45.6466	50.0041	36.0864	42.5613	38.7826	50.801	26.8812	63.5961	43.0512	73.9968	68.2904	75.096	59.7464	67.3564	54.2927
feature_10206	Hlcs	794.936	909.535	979.84	791.63	838.383	840.737	739.953	852.117	800.966	814.979	835.152	914.403	714.215	610.54	726.29	723.232	1016.95	721.675	978.595	966.941	831.228	818.292	982.819	792.761	988.936	954.348	892.888	901.493	983.423	855.068	876.498	888.643	780.081	843.549	744.742	891.597	726.38	712.739	730.67	914.92	928.503	864.689	767.967	961.573	913.998	912.067	964.506	781.427
feature_10207	Hlf	6873.79	8242.83	5417.61	5729.64	7003.8	9745.26	8840.93	7252.84	6835.72	6706.08	6804.78	7250.55	5914.36	5239.83	8293.73	5689.29	4613.72	4034.36	5155.98	3988.4	5212.29	4849.65	4398.54	5729.15	7612.98	8064.91	8229.72	6349.6	9683.44	7869.11	9171.89	5715.26	9402.76	6517.42	8193.22	8110.63	6133.56	6708.53	6171.78	9023.43	5091.32	5711.16	4782.79	5289.2	6088.71	6472.22	8571.1	5881.06
feature_10223	Hmgb3	3019.69	3876.54	2308.97	2791.87	3426.34	4261.77	4015.19	3220.5	2222.94	2899.26	2523.56	3588.48	2308.98	1909.87	2065.85	1914.92	1768.19	1739.04	1874.48	1756.58	1974.17	2212.16	1714.68	2339.38	1924.18	2706.91	2202.97	1565.97	2845.05	2335.47	2909.06	1736.39	3530.27	2075.09	2138.47	1863.29	1573.82	1626.29	1414.86	1439.1	1509.04	1644.19	1353.94	1503.49	1449.55	1641.16	1621.23	1510.5
feature_10226	Hmgcl	841.885	990.729	992.708	735.793	1012.68	849.597	949.011	910.297	810.29	784.834	877.762	905.482	783.869	755.447	785.942	690.358	642.539	817.775	863.357	788.724	847.119	774.372	987.019	750.4	647.479	892.31	735.601	777.696	864.12	889.386	864.559	802.59	862.666	872.763	792.618	821.185	846.497	638.621	591.237	737.312	857.638	833.545	736.968	742.383	832.973	767.368	816.696	770.763
feature_10229	Hmgcs1	10221.1	9738.85	10438.1	11556.5	12308.8	11405.1	11021.4	10459	11175.3	13848.2	11078.5	10711.9	13668.8	11903.6	12012	12272.3	10854.3	9853.96	10789.6	10433.5	10406.2	11920.7	10891.9	10752	9152.75	9950.86	10908.4	8630.84	10537.6	9969.13	11613.3	10125.2	10637.6	10323.4	11054.1	11768.6	9426.86	12018.3	10474.7	9802.99	9254.14	10331.4	10286.6	9603.62	11209.1	10428.6	10393.5	9931.69
feature_10230	Hmgcs2	847.22	509.616	581.837	412.476	521.783	492.235	511.641	628.347	652.708	275.607	633.821	510.728	459.509	617.303	615.358	495.167	769.356	771.573	752.765	500.835	677.206	723.518	719.264	791.032	517.554	367.057	473.777	544.916	528.58	592.924	424.818	580.216	422.876	437.294	418.119	378.467	609.1	313.708	745.802	657.629	763.153	802.402	781.966	638.846	504.922	407.023	612.756	747.494
feature_10253	Hnrnpa1	314.773	422.377	317.115	294.497	290.125	297.31	241.15	310.593	264.813	261.611	284.42	297.739	207.923	218.326	267.911	318.469	231.894	232.858	250.922	231.225	250.591	208.04	308.706	230.826	352.194	392.906	293.473	381.97	307.371	254.519	275.584	301.61	272.63	266.576	338.326	290.451	268.609	269.755	262.652	320.654	239.848	229.912	263.989	323.829	307.301	233.385	270.361	330.604
feature_10257	Hnrnpc	11412.9	8354.25	7337.77	11063	8565.84	9315.05	8681.39	8381.53	9291.76	8703.15	7138.2	7325.26	9449.05	9936.74	9439.68	8504.14	9917.08	10218	10212.5	10490.1	10611.6	12105.6	9813.49	11201.5	8851.03	8322.37	8237.39	7123.06	8890.58	8362.89	8744.08	7864.87	9439.58	7597.42	8295.36	7432.91	8922.74	8832.1	8344.34	9231.76	8893.46	10865.4	10385.5	7735.54	9153.81	9465.14	8880.75	9054.28
feature_10258	Hnrnpd	12318.8	11849.9	10382.1	11317	12693.8	13186	11553.2	12072	12021.9	13726.5	11260.7	11562.7	10883.7	10619.7	10870.3	11169	11444.9	11769.5	11947.6	10725	11507.6	12195.8	11110.3	11926	12033.7	12744.6	13328.1	10906.8	14177.2	11709.8	12161.5	10737	12890.2	10884	12108.4	12154.1	10471	11129.8	10779.5	11437.9	10849.5	11014.7	8997.61	10138.9	11836.5	11307	11939.9	10905.1
feature_10259	Hnrnpdl	6488.6	6954.97	6698.02	6374.47	7546.55	7404.19	6883.31	6910.02	7269.3	8575.04	7057.25	7920.74	6182.58	5420.48	5396.94	5072.9	5786.47	5886.14	5875.29	5254.2	6883.3	6208.85	5967.27	6072.36	6787.25	8750.43	8007.22	7330.45	8370.28	7014.04	7092.57	6127.63	6579.94	6200.63	7014.4	6325.67	5233.15	5238.24	5083.34	5195.75	5173.09	6242.43	4519.8	4913.61	6124.28	5948.51	6362.37	5477.75
feature_10262	Hnrnph2	8222.52	8456.18	6650.22	7735.28	7976.77	8979.34	8549.35	7833.75	7738.32	9044.43	7919.03	7911.82	7921.86	7176.75	7972.45	7275.47	7652.49	7611.32	7756.27	7605.75	7635.07	7889.35	7759.65	8288.98	8184.22	8308.92	8739.94	6259.66	8865.72	7673.69	8040.7	6768.34	8714.22	7107.17	7646.37	7275.36	7192.86	7292.86	7338.05	7521.93	6753.9	7326.04	7008.7	6793.8	7858.41	7760.5	7410.14	7239.35
feature_10265	Hnrnpl	6162.09	7753.94	7167.72	6408.69	6258.09	6147.03	6632.07	6415.04	6033.82	5813.59	6920.89	6791.12	5939.31	5843.6	7118.48	6804.95	6337.22	6236.35	6292.56	6288.77	7435.82	6601.81	7119.14	6514.99	7125.49	7421.78	6651.1	7503.97	6621.33	6688.03	6812.01	6729.15	6521.24	6541.16	7011.21	6519.31	6846.69	6369.83	6568.46	7155.19	6628.53	7241.77	6836.7	6568	6872.28	6844.7	7208.07	6809.86
feature_10267	Hnrnpm	5976.42	6518.77	6038.97	6399.68	4997.2	5805.41	5734.41	5504.75	6035.68	5241.92	6095.33	5416.17	6881.2	6595.19	7720.23	7688.45	6935.07	6520.03	7036.03	6893.8	7140	6715.08	6322.17	6687.03	7022.41	6309.24	6121.7	6262.83	6432.43	5790.06	5904.67	6350.86	7002.82	5999.79	6793.11	6350.32	7474.71	6980.01	7072.15	8265.96	6903.81	6788.36	7526.67	7090.09	6707.26	6891.38	6983.54	6981.46
feature_10274	Homer2	1841.69	1315.5	1331.88	1267.15	1337	1506.24	1539.51	1562.81	1646.69	1770.99	1461.52	1519.92	1789.18	1900.21	1921.42	1745.41	1645	1588.42	1585.45	1527.18	1679.57	1569.55	1306.23	1641.72	1518.3	1426.87	1525.87	1644.27	1903.05	1578.59	1636.59	1583.88	1823.84	1572.98	1500.12	1842.16	1923.77	1535.79	1864.51	2114.01	1618.07	1509.54	1465.94	1768.94	1440.66	1739.18	1820.49	1945.81
feature_10277	Hook1	2378.41	2751.06	2623.32	2027.26	1909.53	2977.03	2699.41	1907.42	2429.94	2451.4	2356.32	3195.95	2476.36	2095.35	2953.3	2301.19	2153.47	1751.98	2402.34	1936.62	2734.5	2288.44	1875.34	2234.77	2289.26	3096.72	2842.66	2139.46	2866.59	2675.78	2268.35	1972.39	2652.67	1804.87	2379.98	2521.64	2153.6	2286.45	2158.5	2648.75	1579.91	1793.5	1519.93	1868.07	1971.27	2110.73	2728.87	2208.55
feature_10278	Hook2	565.525	813.659	1034.99	633.124	557.083	602.495	728.033	581.802	583.707	634.111	781.89	767.207	589.461	442.448	675.01	693.44	508.475	508.222	506.49	523.684	663.76	568.643	547.061	556.748	801.027	941.94	749.028	767.115	748.131	655.838	602.903	742.097	669.636	660.05	803.257	695.322	644.094	627.417	570.701	780.514	546.926	679.66	578.975	718.151	709.46	708.555	765.243	651.513
feature_10280	Hopx	236.88	183.98	160.855	423.283	377.272	282.543	257.654	264.944	341.273	465.087	170.439	287.703	414.806	237.647	222.91	149.988	161.843	304.009	213.748	207.463	222.476	201.106	246.755	229.961	295.285	325.698	327.041	281.452	260.147	430.871	324.334	191.701	357.206	333.22	291.513	284.29	258.205	197.361	189.153	205.449	260.744	228.08	270.988	147.595	254.931	233.385	254.457	227.836
feature_10339	Hpn	5.33514	9.50132	16.5451	4.50301	15.4439	5.90682	12.8369	12.5311	0.93244	8.61272	6.39147	6.69076	3.11884	4.83022	3.13958	3.08195	4.83112	12.0125	1.85868	16.4508	17.1135	13.8694	3.15006	0	3.22129	14.4755	8.63157	29.6265	9.94194	11.439	4.97445	11.0761	6.96501	4.56466	3.19175	4.40077	8.51226	2.58551	4.32349	4.80021	15.4448	14.6557	4.99978	7.71021	16.7978	4.66769	9.35505	6.78659
feature_10349	Hr	802.405	770.471	836.448	915.013	617.756	642.858	594.163	806.468	1216.83	617.963	882.023	896.561	981.396	1405.6	1011.99	987.252	845.446	716.131	766.705	882.859	787.222	552.463	1093.07	637.148	710.831	649.329	770.128	865.518	1064.62	992.337	752.136	1466.3	740.281	951.275	1202.23	1032.42	1471.68	729.975	1560.78	978.282	1107.48	1031.4	1600.93	986.907	782.58	832.716	976.667	1137.24
feature_10368	Hs3st3b1	136.58	139.065	95.5941	63.9428	87.1477	92.5401	137.538	89.5081	155.717	151.799	119.307	111.513	153.863	127.518	158.026	161.289	112.324	96.1002	161.705	129.779	128.351	171.055	80.8516	125.355	59.057	71.3434	90.1519	82.531	93.6199	104.858	158.187	69.0125	99.5001	106.813	121.287	87.1353	118.226	77.5653	111.33	116.165	75.4068	110.834	108.995	62.7831	52.3696	93.3538	89.8085	108.585
feature_10372	Hs6st1	2089.24	2733.79	2384.34	1911.08	2147.8	2513.35	2637.98	2310.2	1978.64	2051.98	2342.47	2448.82	2496.11	1926.29	2773.3	2760.4	1838.24	1728.88	1972.06	1911.95	1985.17	1673.57	2241.79	2012.59	2449.25	2345.03	2056.23	2061.16	2101.89	2333.56	2335.01	2104.46	2394.97	2213.86	2223.59	2269.92	2193.33	1878.8	2129.32	2205.22	2185.89	1935.47	2144.91	1929.76	2119.49	2046.32	1927.14	1976.84
feature_10377	Hscb	277.427	362.778	291.378	337.726	324.322	268.76	318.171	308.803	321.692	242.233	297.203	315.581	281.735	235.715	240.701	233.201	304.361	245.795	296.459	260.471	271.371	312.06	319.206	293.071	236.228	290.544	224.421	330.124	320.627	318.387	278.569	241.118	307.455	297.616	269.171	201.555	273.338	231.834	175.101	208.329	251.659	255.56	292.987	223.596	300.384	257.657	289.071	269.525
feature_10380	Hsd17b1	6.40217	6.91005	16.5451	7.20482	1.10314	4.92235	11.9199	0.895081	0.93244	3.22977	1.06524	3.34538	0	4.83022	9.41875	7.19122	12.0778	8.31636	10.2227	0.913933	18.3359	2.31156	7.35014	8.64516	4.29505	10.3396	5.75438	0	2.48548	6.67277	2.98467	1.70401	3.98001	3.65173	4.25567	3.52062	13.2413	3.44735	8.64698	15.3607	0.908515	9.15984	14.9993	15.4204	2.96432	3.73415	7.48404	7.7561
feature_10388	Hsd17b4	3021.82	2645.69	2787.86	2827.89	2910.07	2826.41	2773.68	2898.27	3136.73	2634.42	3083.88	2707.53	3004.48	3121.29	3144.81	2947.37	2840.7	3221.2	3140.24	2803.95	2998.53	2988.85	2778.35	3113.12	2498.65	2610.76	2846.5	3065.29	2975.95	2651	3064.26	2942.83	2989.98	2900.38	2965.14	2889.55	3063.47	2944.9	3148.58	2812.92	3247.94	3085.03	3283.86	3206.35	2824.01	3108.68	2935.61	3001.61
feature_10390	Hsd17b7	575.128	539.848	547.828	512.443	642.025	567.054	514.391	576.432	504.45	743.924	529.427	562.024	640.402	445.347	479.31	553.724	502.436	484.197	564.109	498.094	499.959	543.216	535.51	518.71	434.874	518.015	560.093	423.236	512.01	502.365	485.506	460.083	516.406	535.891	533.022	519.291	455.879	402.478	430.187	361.936	507.86	468.984	403.982	402.032	481.208	466.769	544.464	441.128
feature_10399	Hsdl2	2809.48	2235.4	2006.56	2585.63	2231.64	2313.5	2222.61	2240.39	2732.05	2479.39	2298.8	2089.75	2156.16	2567.75	2408.06	2197.43	2310.48	2727.77	2709.03	2389.02	2592.7	2794.67	2321.6	2787.2	1941.36	2056.55	2161.73	2217.76	2227.82	2071.42	2322.07	2030.33	2369.1	2057.75	2084.21	2122.93	2270.88	2070.99	2259.02	2356.9	2574.73	2602.31	2454.89	2222.74	2016.72	2324.51	2321.92	2447.05
feature_10408	Hsp90aa1	90352.7	61806.1	56056.8	79596.2	63169.9	62476.4	59584.1	59181.8	74886.1	76314.1	49451.8	53193.7	79809.1	89792.9	76080.5	67507.1	81187	82122.2	79133.3	80787.1	78949.5	105289	72143.8	86456.8	71817.5	65702.1	63210.9	55825.9	70153.6	64438	61750.8	58917.1	70161.5	56348.9	56195	59360.3	72207.6	76771.5	68049.6	75336.4	68092.3	93258.2	77970.6	60270.7	65444.2	72567.7	64124.2	69883.5
feature_10409	Hsp90ab1	99988	91263.6	81716.4	99562.6	91263.5	84295.2	86632.3	80528.6	89865.8	95450.5	78407.3	76805.4	101730	103155	101577	93590.7	100911	96961.4	97158.8	99446	96218.3	115661	99082	101279	95830.1	91914.1	90098.2	81660.2	97333.2	86969.1	90296.2	90280.3	97128.1	84271.8	90032.9	88115.8	98727.1	101935	93796	99358.6	94896.2	116466	106538	96658.5	92130	99572.1	91634.6	92361.6
feature_10410	Hsp90b1	37602.1	30082.9	25660.6	35050.6	30965	32817.3	29043.4	26427.3	31946.3	35459.6	27595.2	29538.6	34815.6	35321.5	35574.6	30777.4	36017.2	35846.3	35520.3	34460.8	33062.1	40789.8	32756.4	36599.3	29595	30569.1	30677.6	25532.8	31632.8	27601.5	29342.3	26420.7	34035	25088.3	28088.5	27404.5	28753.5	34123.6	28666.9	31881.1	29269.6	38386.1	31941.6	28601.6	30129.3	32364.8	27789.2	28771.3
feature_10415	Hspa1a	236.88	266.901	404.437	254.871	195.255	168.344	234.731	309.698	213.529	212.088	240.745	177.305	383.618	421.196	378.843	469.484	253.634	289.225	184.939	352.778	215.141	231.156	305.556	226.503	294.211	209.894	244.561	286.742	220.38	295.509	222.855	319.502	274.62	321.352	258.532	283.41	553.297	444.708	583.671	387.857	350.687	316.93	593.974	465.917	293.467	300.599	267.554	350.964
feature_10416	Hspa1b	125.909	119.198	136.957	168.413	70.6006	90.5712	99.9441	102.039	130.542	80.7442	103.329	91.4403	349.31	415.399	413.378	307.168	157.011	202.365	123.602	194.668	112.46	127.136	136.503	154.748	146.032	75.4793	97.8244	107.925	74.5645	101.045	87.5503	177.217	163.18	146.069	146.821	205.956	518.302	334.393	463.694	314.894	236.214	171.289	330.986	231.306	118.573	141.898	144.068	283.098
feature_10418	Hspa2	1980.4	1884.72	1617.75	1884.96	1813.55	1919.71	1781.57	2166.99	2894.29	1868.96	2476.69	2126.55	2350.57	3579.2	2649.81	2414.2	2270.63	2647.37	2666.28	2431.06	2457.01	2931.06	1478.43	2143.14	1695.47	2101.01	2076.37	2802.88	1749.78	2436.52	2521.05	2383.06	2344.22	2686.76	3333.25	2548.05	3294.24	2655.32	3177.77	3160.46	2882.72	2892.68	3154.86	2914.46	2141.23	2170.48	2766.29	2576
feature_10420	Hspa4l	9000.38	6764.94	5994.85	7313.8	6047.39	7015.33	6356.08	5826.97	7240.4	7230.38	5825.82	5762.97	8693.25	8917.56	8789.78	8472.29	8211.7	8032.68	8101.06	8635.75	7047.1	8494.98	7536	8244.03	7414.33	6885.16	6981.02	6268.12	7221.99	6969.24	6566.27	6338.07	6901.33	6237.15	6045.18	7643.27	7983.55	8163.31	8705.35	9339.29	7471.63	7958.98	7494.68	7655.14	6553.12	8275.82	7035	8002.36
feature_10421	Hspa5	22913.4	21649.2	19808.2	26985.7	22723.5	23521.9	21330.3	20247.6	24543.7	25592.7	22764.3	25074.7	32248.8	31290.2	32619.2	26381.5	26677.4	28231.3	26434.1	28440.7	24218.1	29719.7	22918.8	26691.1	22545.8	21848.7	20704.3	21232.7	21782	21623.6	22822.8	21791.8	28667	21304.2	21737.9	21821.7	26806.1	29276.6	25635.1	25749.3	24439.1	29589	29775.7	23019.4	23531.7	23855.6	21044.2	22592.6
feature_10422	Hspa8	64808.1	48523.2	53888.4	64750.6	69553.8	66669.2	63732.3	58084.5	66027.9	63834.2	47372.5	48841.4	75375.1	76271.2	79604.1	57743.5	75479	70449.7	64773.1	77717.2	79599.9	87661.2	75610.9	79040.1	67770.5	58291.7	63385.4	49068.9	65442.8	56647.1	51697.4	54436.4	75268.9	60207.9	62231.7	61936.5	62185.8	65555.6	71147.4	71399.3	65469.4	89036.4	85615.3	60700.3	74753.2	77222.3	66241.2	60886.4
feature_10427	Hspb3	5.33514	0	3.6767	2.70181	2.20627	7.87575	6.41843	9.84589	22.3786	2.15318	13.8482	5.57563	6.23768	6.76231	11.5118	15.4098	10.87	15.7087	15.7988	5.4836	12.2239	16.1809	10.5002	13.8323	7.51634	2.06793	16.3041	5.29045	2.48548	6.67277	15.9182	1.70401	9.95001	10.9552	7.44742	8.80155	17.0245	21.5459	2.16175	12.4805	15.4448	28.3955	5.99974	3.30438	12.8454	9.33538	9.35505	1.93903
feature_10430	Hspb8	858.958	621.041	682.027	881.69	883.611	760.995	680.354	796.622	947.359	530.759	548.601	625.586	746.443	995.026	692.801	660.565	961.393	974.862	930.269	803.347	1046.37	1014.77	850.517	947.51	622.782	751.691	672.303	754.418	743.988	720.66	706.371	781.29	914.406	782.383	828.791	683.88	1030.93	781.686	816.059	694.11	969.386	981.935	1206.95	869.051	678.829	855.121	879.375	932.671
feature_10437	Hsph1	21176.2	15198.7	16247.3	18988.3	14410.3	14984.6	15500.5	13750.2	16494.9	15084.1	13542.5	12518.4	21343.3	24077.7	23677.7	22384.2	20050.4	21644.7	19672.3	21750.7	19791.8	24042.5	21550.6	20670.6	19437.3	14658.5	15751.7	14129.7	18503.6	17390.2	14666.7	18060	17352.8	14590.5	14635.2	16230.1	22291.7	21674.3	23587.9	23162	19555.8	24591.4	26886.8	19865.9	17259.2	21614.2	17342.4	20393.7
feature_10440	Htr1a	695.702	628.815	709.602	701.57	848.311	732.445	565.739	672.206	701.195	577.052	561.384	536.376	889.91	825.968	690.708	747.887	859.939	856.585	786.221	958.716	548.855	679.598	919.818	796.219	1045.84	752.725	847.812	725.85	1215.4	850.302	622.801	857.118	665.656	634.488	661.756	955.848	980.802	1154.86	1051.69	1459.26	991.19	983.767	812.965	903.196	968.344	956.877	708.177	983.086
feature_10441	Htr1b	199.534	131.291	225.198	139.593	197.461	147.67	175.131	224.665	116.555	115.195	245.006	158.348	227.675	301.406	230.236	295.868	208.946	215.301	207.243	265.955	94.1243	164.121	201.604	172.903	241.597	191.283	223.462	203.153	145.815	191.604	153.213	301.61	118.405	241.927	126.606	291.331	288.471	287.853	329.666	220.81	249.842	189.609	192.992	316.119	260.86	196.043	159.971	297.64
feature_10454	Htra1	4560.48	3108.66	3139.9	3431.3	3613.87	3109.94	3151.45	3595.54	3720.44	2689.32	3378.96	2941.7	3481.67	4295.03	3451.45	3117.91	3781.56	5039.71	4131.84	3966.47	4228.26	4498.29	4170.68	3981.1	3046.26	2945.76	3438.24	3607.03	3104.37	2904.56	3544.79	3759.9	2827.79	3722.94	3287.5	3035.65	4086.83	3530.94	4194.87	3348.63	4823.31	4753.04	5292.77	4423.46	3787.41	3659.47	3675.6	3899.38
feature_10455	Htra2	901.639	1131.52	1229.85	950.136	1030.33	1050.43	1030.62	1050.82	885.818	965.701	1051.4	1009.19	863.919	816.308	838.268	835.209	950.523	961.002	820.607	864.581	949.8	876.081	1053.17	838.581	1050.14	1152.87	1007.98	1068.67	1011.59	962.786	878.487	1111.02	915.401	1026.14	1074.56	946.167	1025.25	831.672	847.404	827.556	1003.91	951.707	965.958	951.66	1052.33	998.886	910.246	942.366
feature_10475	Hyou1	10302.2	11790.3	10543.8	10438	11132.8	10217.8	10201.6	10089.3	10319.3	10880	12058.6	12522.9	12830.9	10429.4	13669.7	13489.7	11452.2	10571.9	11661.4	11517.4	9892.83	10538.4	11356	10349.1	12196.9	11043.8	10592.9	10075.1	11132.5	11356.1	10995.5	11318.9	12553.9	10693.2	11008.3	11417.4	11804.6	12894.8	11681	12645.7	11695.3	10946.9	12146.5	12094	11352.3	11877.4	10575.9	10783.9
feature_10503	Id3	503.637	789.473	737.178	555.672	665.19	650.734	626.256	708.009	645.248	502.767	940.611	673.536	487.579	450.177	708.499	477.703	535.046	492.513	714.662	388.422	642.979	418.392	633.162	549.832	514.332	492.166	458.432	531.161	636.284	635.82	749.152	673.085	942.266	686.525	833.047	577.382	756.645	479.181	572.863	597.146	549.652	632.029	776.966	527.599	452.552	476.104	678.241	587.525
feature_10510	Idh3g	4008.82	4239.32	4695.14	4361.62	4597.87	4437.99	4280.18	4145.12	4019.75	4430.17	4088.41	4433.74	4192.76	3858.38	3845.99	3932.57	3954.27	4116.6	3896.72	4254.36	4370.06	4225.53	4665.24	4023.46	4610.74	4612.51	4306.19	4322.3	4470.56	4396.41	4503.86	4365.68	4176.02	4282.56	4282.27	4105.04	4301.53	4069.59	3931.13	3898.73	3962.04	4675.18	4574.8	4182.24	4480.07	4278.41	4172.35	4255.19
feature_10517	Idua	498.302	694.46	800.601	523.25	491.998	610.371	607.917	627.452	531.491	566.286	651.93	636.737	451.192	534.223	605.939	608.172	617.176	596.006	530.653	594.971	705.321	478.493	607.962	542.916	644.258	795.117	648.327	791.451	647.054	641.54	571.067	685.865	562.176	555.975	712.824	655.715	559.918	586.911	538.275	666.269	575.999	563.33	587.975	645.455	666.971	623.604	753.082	640.848
feature_10519	Ier3	160.054	223.713	190.269	138.693	206.286	177.204	186.135	225.56	155.717	171.178	205.592	196.262	124.754	118.824	162.212	162.316	115.947	118.277	146.836	151.713	129.574	115.578	153.303	120.168	256.629	206.793	227.298	171.411	200.496	142.988	192.014	161.029	128.355	226.407	208.528	224.44	184.432	148.236	161.05	187.208	210.776	132.818	149.993	128.871	207.502	158.701	143.132	188.085
feature_10538	Ifit1	213.406	33.6865	111.22	94.5633	121.345	407.57	98.1103	64.4458	162.245	87.2038	58.5885	187.341	80.0503	174.854	34.5354	49.3113	60.389	69.303	121.744	55.7499	77.0108	78.593	53.551	84.7226	30.0654	54.8	52.7485	26.4522	115.989	76.2603	89.54	63.0485	128.355	93.119	78.7298	53.6895	76.6103	92.2165	45.3967	62.4027	51.7854	73.2787	44.998	45.1598	39.5242	65.3477	50.5173	48.4756
feature_10540	Ifit1bl2	22.4076	23.3214	26.656	27.0181	22.0627	32.4875	21.0891	29.5377	29.8381	40.9104	17.0439	22.3025	33.2676	37.6757	29.3028	35.9561	14.4934	30.4933	43.679	31.9877	39.1166	48.5427	33.6007	33.7161	19.3277	19.6453	21.0994	14.8133	19.0554	28.5976	14.9233	17.8921	30.845	17.3457	14.8948	29.0451	20.8077	26.7169	30.2644	31.6814	35.4321	21.9836	24.9989	25.3335	26.6789	23.3385	16.8391	32.9634
feature_10541	Ifit2	731.981	464.701	609.412	532.256	516.267	843.69	575.825	639.983	764.601	836.51	657.256	696.954	558.273	851.085	554.66	567.079	626.838	701.346	764.847	523.684	578.192	520.101	533.41	576.632	447.759	540.763	655.04	433.817	656.996	672.044	698.412	593.848	675.606	632.662	614.944	603.786	567.484	660.167	594.48	563.544	628.693	667.752	580.975	577.164	500.97	621.736	629.595	601.098
feature_10542	Ifit3	952.856	406.829	565.292	580.889	858.239	2091.01	664.766	661.465	1459.27	953.859	873.501	1616.93	797.384	1384.34	769.198	726.314	655.824	864.901	962.796	627.872	576.97	716.583	436.808	538.594	267.367	454.944	624.35	630.622	999.993	758.79	936.191	769.362	1182.06	1035.26	884.115	808.862	905.137	1048.85	689.597	643.228	662.308	731.871	637.972	474.729	508.874	600.265	570.658	451.793
feature_10543	Ifit3b	649.82	259.127	535.878	350.335	540.536	1256.18	488.718	479.763	903.534	659.95	706.257	849.726	582.184	855.916	610.125	594.817	548.332	622.803	639.386	456.053	451.063	517.789	359.107	466.839	227.638	346.378	424.865	414.771	752.273	479.487	561.118	616.001	680.581	721.216	627.711	606.427	634.636	752.383	515.576	442.579	486.056	606.381	537.977	448.294	386.349	379.017	470.559	380.049
feature_10603	Igf2bp3	19.2065	57.8717	34.9286	36.9247	9.92822	31.503	29.3414	3.58032	7.45952	3.22977	12.7829	3.34538	14.5546	2.89813	13.6049	25.6829	18.1167	9.2404	11.1521	8.2254	11.0015	2.31156	8.40016	31.9871	2.14753	15.5094	7.67251	0	15.7414	13.3455	10.9438	6.81605	10.945	7.30345	4.25567	5.28093	3.78323	3.44735	6.48524	1.92008	0	6.41189	2.99987	5.50729	3.95242	8.40184	7.48404	2.90854
feature_10611	Igfbp5	22197.4	36469.5	18090.3	15935.3	22877.9	33025	32039.9	22186.4	21730.5	22390.9	29119.5	31913.8	21999.3	14596	30058.4	24251.9	16871.5	12323	23442.6	14787.4	20460.4	19458.7	17972.1	19981.6	16501.6	16823.6	14903.8	12907.6	24302.2	17990.8	19655	11599.2	23647.2	13861	14678.9	14741.7	14986.3	13620.5	14152.9	21655.7	12845.5	15881.3	10508.5	12844.1	10872.1	13415.9	16425.6	14109.3
feature_10617	Igfn1	13.8714	21.5939	36.767	9.00603	59.5693	35.4409	82.5227	38.4885	117.487	5.38295	57.5232	30.1084	23.9111	23.1851	1.04653	8.21854	28.9867	24.025	21.3748	13.709	35.4494	30.0503	53.551	8.64516	10.7376	10.3396	39.3216	55.0207	17.3984	41.9432	14.9233	17.0401	18.905	20.9974	14.8948	14.0825	24.591	13.7894	15.1322	14.4006	14.5362	8.24386	2.99987	9.91313	18.774	8.40184	38.3557	14.5427
feature_10629	Igsf6	16.0054	5.18254	9.19174	16.2109	22.0627	13.7826	11.003	15.2164	24.2434	23.685	10.6524	15.6118	18.7131	17.3888	8.37222	14.3824	33.8178	35.1135	27.8802	36.5573	15.8911	30.0503	34.6507	36.3097	16.1064	12.4076	32.6081	29.6265	10.7704	17.1586	14.9233	13.6321	24.875	24.6492	17.0227	14.9626	10.4039	20.6841	28.1027	13.4406	34.5236	36.6394	28.9987	38.5511	16.7978	14.9366	18.7101	14.5427
feature_10671	Il17rd	528.179	408.557	424.658	349.434	339.766	359.331	358.515	404.576	353.395	386.496	390.945	338.998	414.806	374.825	488.728	507.495	378.035	425.058	447.012	356.434	399.723	453.066	409.508	502.284	376.891	363.955	417.192	444.398	290.802	368.909	395.966	342.507	403.971	342.349	378.754	444.478	367.919	455.911	498.282	559.704	451.532	356.318	415.982	475.83	345.837	462.101	426.59	497.36
feature_10674	Il18bp	58.6865	74.283	111.22	54.9368	62.8787	84.6644	77.0212	50.1245	54.0815	38.7572	92.6763	133.815	44.7034	61.8269	62.7916	42.12	30.1945	43.4299	56.6897	42.9549	96.5691	30.0503	64.0512	38.9032	86.9748	128.211	70.0116	68.7758	89.4774	49.5692	91.5298	83.4966	95.5201	63.9052	59.5793	75.6933	60.5316	58.6049	48.6393	80.6435	35.4321	46.7152	30.9987	109.044	69.1674	62.5471	100.099	65.9269
feature_10725	Il6st	7060.52	6337.38	5367.98	4792.11	5641.43	6001.32	5660.14	5413.45	6186.74	4717.62	6833.54	6419.78	6095.26	6488.92	7880.35	7280.6	5891.55	5687.47	7371.52	5757.78	5645.02	6030.86	5745.71	6076.68	5417.13	5329.04	5703.55	5726.38	5980.9	6035.05	5897.7	5446.88	6553.08	5482.16	5685.57	6792.16	6158.15	6269	6748.97	7832.98	6545.85	5351.18	5782.75	6561.39	4693.5	6535.7	6121.01	6614.02
feature_10735	Ilkap	1431.95	1466.66	1613.15	1623.79	1353.55	1395.98	1478.99	1398.12	1408.92	1431.86	1328.36	1511	1550.06	1690.58	1679.68	1498.86	1594.27	1402.69	1518.54	1529.92	1646.56	1659.7	1586.58	1723.85	1672.92	1520.96	1358.03	1397.74	1523.6	1444.18	1326.19	1473.12	1612.9	1386.74	1627.79	1268.3	1632.46	1517.69	1556.46	1439.1	1472.7	1811.82	1747.92	1439.61	1633.34	1513.27	1477.16	1589.03
feature_10738	Immp1l	835.483	542.439	707.764	715.079	607.827	775.762	797.719	750.078	835.466	849.429	546.47	685.802	777.631	763.175	793.268	660.565	832.16	779.89	812.243	869.15	749.328	755.88	754.965	881.806	484.267	510.778	543.789	511.057	523.609	640.586	663.591	517.168	844.756	638.139	742.614	566.82	630.853	611.042	644.2	729.632	657.765	857.361	682.97	555.135	802.342	665.613	798.921	608.854
feature_10758	Ing1	1505.58	1547.85	1502.85	1764.28	1575.28	1546.6	1634.87	1517.16	1484.44	1566.44	1629.82	1796.47	1806.85	1685.75	1819.91	1802.94	1555.62	1578.26	1601.25	1805.02	1728.47	1851.56	1594.98	1670.25	1537.63	1403.09	1500.93	1429.48	1623.85	1509	1538.1	1517.42	1641.75	1625.02	1728.86	1571.08	1763.93	1702.99	1628.88	1619.59	1499.96	1547.1	1693.93	1479.26	1712.39	1531	1564.16	1472.69
feature_10759	Ing2	672.228	541.575	626.877	654.738	711.522	613.324	685.855	598.809	863.439	765.455	679.626	626.701	995.95	704.247	804.78	703.713	695.681	650.524	595.707	734.802	789.667	804.422	617.412	752.994	643.184	620.378	700.116	621.099	768.014	669.184	667.571	760.842	815.901	674.657	723.463	831.746	750.025	848.047	762.015	790.114	770.421	938.883	813.965	638.846	757.877	753.365	798.921	725.196
feature_10769	Inmt	5.33514	18.1389	15.626	11.7078	17.6502	18.7049	14.6707	17.0065	22.3786	8.61272	36.2183	44.605	23.9111	21.253	65.9312	31.8469	12.0778	18.4808	20.4455	21.0205	28.1151	23.1156	3.15006	19.8839	5.36881	5.16981	15.345	34.917	4.97097	11.439	10.9438	29.8202	31.84	31.0397	51.068	8.80155	24.591	20.6841	10.8087	9.60042	14.5362	25.6475	5.99974	6.60875	6.91674	29.8732	16.8391	14.5427
feature_10770	Ino80	1258.03	1403.6	1384.28	1024.89	1075.56	1379.24	1273.6	1113.48	1138.51	1139.03	1062.05	1308.04	1017.78	1130.27	1253.74	1023.21	1192.08	1160.59	1107.77	1036.4	1234.62	940.804	1092.02	1101.39	1246.64	1417.56	1383.93	1032.7	1280.85	1248.76	1206.8	1078.64	1177.09	1039.83	1166.05	1307.91	1134.02	1079.02	1137.08	1336.38	1059.33	1061.63	879.962	1067.31	1193.63	1306.95	1307.84	1189.59
feature_10775	Ino80e	1093.7	1166.07	1105.77	1212.21	1267.5	1137.06	1191.08	1140.33	1183.27	1075.51	1146.2	1095.05	1120.7	1275.18	1469.32	1266.68	1258.51	1239.14	1223.94	1322.46	1250.51	1248.24	1253.72	1114.36	1394.82	1158.04	1194.03	1201.99	1311.51	1295.47	1132.18	1300.16	1410.91	1262.58	1440.54	1129.24	1422.49	1359.12	1351.09	1310.46	1313.71	1297.03	1422.94	1345.98	1426.82	1323.76	1255.45	1380.59
feature_10777	Inpp4a	5703.27	5918.46	6083.09	6057.46	5651.36	5722.72	5899.46	6194.85	6206.32	6363.72	6418.1	5471.92	6529.82	6344.02	7816.51	8371.61	6474.91	6044.15	6379.92	6923.04	5728.14	5607.84	5858.06	5723.96	7081.47	6191.37	6247.34	6251.2	7204.59	6760.47	5497.76	6889.32	6406.81	7019.53	6629.27	7626.54	6964.92	7210.99	7418.03	8969.67	7436.2	6312.05	6756.71	7760.88	6926.62	8107.78	7717.92	7247.11
feature_10783	Inpp5f	9420.79	9103.99	8199.95	7645.22	9114.1	10654.9	8564.02	8259.8	7578.87	9146.71	8396.26	8354.52	8838.8	7869.4	7704.53	7119.31	7680.27	8236.89	8085.26	7969.5	7259.8	7836.18	8028.46	9060.13	8422.6	9576.56	9638.59	7077.56	9797.78	8169.38	8711.25	7180.71	8513.23	7625.72	7730.42	8458.29	7818.98	8589.06	7442.89	7682.25	7442.56	7747.39	6698.71	6809.22	8004.64	7267.59	7433.52	7385.75
feature_10785	Inpp5k	1060.63	1122.02	1169.19	1295.07	1040.26	1071.1	1143.4	1084.84	1049.93	1192.86	1158.99	1182.03	890.949	995.026	976.41	1128	1115.99	1102.38	1129.15	1074.79	1184.5	1241.31	1123.52	1092.75	1184.36	1246.96	1175.81	1251.72	1175.63	1134.37	1148.1	1271.19	1133.31	1226.98	1061.79	1123.96	1106.59	1056.61	978.19	1056.05	1262.84	1193.53	1105.95	1022.15	1155.1	1176.26	1222.71	1087.79
feature_10803	Ints3	3362.21	3494.76	2957.9	3756.41	3430.75	3273.36	3450.37	3397.73	3246.76	3314.82	3320.37	3395.56	3879.84	3633.29	4605.77	4187.35	3988.09	3459.61	3912.52	3945.45	3433.7	3497.39	3656.17	3402.74	3958.96	3924.92	3760.49	3337.22	3603.12	3783.46	3625.38	3846.81	3762.1	3566.82	3504.54	3972.14	4075.48	4092.86	4065.16	4289.47	3744.9	3655.69	3768.84	4260.44	3797.29	3884.45	3661.57	4038.99
feature_10807	Ints7	821.612	934.584	989.951	780.823	820.733	809.234	764.71	784.091	645.248	770.838	904.393	829.654	653.917	660.775	777.57	685.221	789.888	804.839	844.77	667.171	757.884	580.201	844.216	728.787	814.986	840.612	974.408	654.958	916.315	872.227	787.952	721.649	734.311	750.43	791.554	736.69	738.675	822.192	786.875	741.152	837.651	697.064	737.968	757.804	861.628	780.438	817.631	829.903
feature_10808	Ints8	1849.16	1886.44	1692.2	1754.37	1447.31	1948.26	1601.86	1609.35	1822.92	1858.19	1708.65	1745.17	2591.76	2226.73	2784.81	2223.12	1920.37	1813.89	1966.48	1879.05	1866.6	2165.93	1723.08	1986.66	1879.08	1830.11	1862.5	1664.38	2184.74	1967.52	1862.43	1755.13	2164.13	1815.82	2066.13	2261.12	2399.51	2165.79	2372.52	2362.66	1752.53	1833.8	2113.91	1908.83	1870.48	1860.54	2047.82	2158.14
feature_10816	Ipmk	1740.32	1798.34	1847.54	1667.92	1744.06	1759.25	1727.47	1577.13	1725.95	1857.12	1652.19	1807.62	1904.57	1852.87	1987.36	1849.17	1797.18	1795.41	1779.69	1945.76	1721.13	1768.34	1645.38	1919.23	1774.93	1692.6	1846.2	1715.16	1931.22	1821.67	1865.42	1684.42	1794.98	1748.26	1804.4	1952.18	1850.94	1942.58	2033.12	1938.32	1747.98	1807.24	1789.92	1618.04	1744.99	1839.07	1657.71	1711.19
feature_10826	Ipw	228.344	153.749	381.457	248.566	112.52	345.549	315.42	163.8	137.069	134.574	107.59	460.547	170.497	138.144	184.189	185.945	164.258	57.2905	103.157	125.209	320.267	191.859	110.252	299.123	171.802	188.181	250.315	267.697	199.667	165.866	230.814	233.45	243.775	176.196	117.031	148.746	138.088	62.0522	132.947	230.41	155.356	134.65	260.989	204.871	88.9295	152.167	165.584	249.165
feature_10829	Iqcc	480.163	422.377	603.897	564.678	442.357	487.312	498.804	471.707	555.734	433.866	504.926	507.382	433.519	549.679	511.752	509.55	652.201	499.906	518.572	529.167	674.761	492.362	580.661	537.729	543.324	542.83	413.356	551.265	483.841	442.31	470.583	491.608	497.501	496.635	557.492	536.895	525.869	527.444	483.15	561.624	461.526	573.406	546.976	515.483	572.113	599.332	500.495	515.781
feature_10850	Irak2	777.863	613.267	633.311	776.32	640.922	554.256	541.899	618.501	590.234	572.746	632.755	541.951	589.461	664.639	622.684	688.303	707.759	699.498	614.294	699.159	662.538	601.005	765.465	666.542	617.414	478.725	548.584	814.729	478.87	507.131	662.596	695.237	666.651	654.572	560.684	600.266	615.72	615.351	591.237	631.707	739.531	686.988	797.965	714.847	683.769	773.903	630.53	672.842
feature_10855	Irf2	603.938	515.663	557.939	538.561	525.092	594.619	574.908	572.852	692.803	673.945	574.167	654.579	604.016	710.043	623.73	572.216	518.138	605.246	614.294	577.606	569.636	700.402	625.812	575.768	527.218	638.989	541.871	523.755	578.289	684.436	580.021	524.836	602.971	557.801	597.921	586.183	720.705	660.167	590.157	609.626	538.75	553.254	629.973	514.381	608.673	528.383	540.722	551.653
feature_10875	Irx1	133.379	177.07	177.401	81.0543	134.582	138.81	177.882	228.246	153.853	161.488	269.507	171.729	184.012	143.941	193.608	199.3	118.362	130.29	162.634	113.328	89.2348	110.955	148.053	101.148	152.474	88.9208	128.514	264.522	151.615	142.988	161.172	216.41	173.13	216.365	264.915	183.072	232.668	170.644	265.895	190.088	171.709	151.137	206.991	152.001	160.073	129.762	189.908	164.817
feature_10892	Ism2	8.53622	15.5476	20.2218	45.0301	14.3408	1.96894	7.33535	9.84589	9.3244	6.45954	4.26098	5.57563	11.4358	17.3888	10.4653	7.19122	8.45446	12.0125	8.36406	7.31147	9.77915	9.24624	12.6002	6.05161	22.549	17.5774	9.59063	9.52281	24.0263	10.4858	3.97956	16.1881	11.94	11.8681	11.7031	17.6031	9.45807	5.17102	8.64698	10.5605	19.9873	3.66394	19.9991	23.1306	15.8097	29.8732	25.2586	20.3598
feature_10900	Isy1	944.32	1089.2	989.031	1223.02	1147.26	1097.68	1202.08	1102.74	1160.89	1220.85	1021.57	1134.08	1208.03	1144.76	1098.85	1147.51	1154.64	985.027	958.149	1189.03	941.243	980.101	1063.67	973.445	1157.52	1337.95	1080.86	1151.2	1172.32	1118.17	1141.14	1260.12	1138.28	1177.68	1249.04	1115.16	966.614	1110.05	957.653	1125.17	1120.2	1136.74	947.959	1073.92	1119.52	1067.97	1100.15	1103.31
feature_10907	Itga10	105.636	111.425	202.218	95.4639	52.9505	88.6022	88.0242	66.236	100.704	43.0636	52.197	81.4042	49.9015	75.3515	106.746	71.9122	115.947	80.3915	84.5699	84.9958	172.358	94.7739	106.052	76.0774	149.253	160.264	115.088	87.8215	74.5645	133.455	99.4889	84.3486	79.6001	69.3828	67.0268	73.0529	122.955	87.0455	70.2567	157.447	84.4919	69.6148	104.995	139.885	79.0485	76.5501	131.906	137.671
feature_10922	Itgav	2251.43	1455.43	1665.54	1616.58	1641.47	1777.95	1796.24	2088.22	1959.99	1586.89	2048.47	1681.61	1681.06	2310.78	2018.75	1837.87	1903.46	2469.04	2253.65	1804.1	2023.06	1823.82	1878.49	2351.48	1396.97	1485.8	1884.56	1838.96	1779.61	1647.22	1722.15	1793.47	1824.83	1914.42	1718.23	2018.2	1838.65	1604.74	2149.86	2099.61	2237.67	1887.84	2039.91	1901.12	1481.17	1954.83	1890.66	1990.41
feature_10941	Itih5	2342.13	1553.03	1450.46	1361.71	1479.3	1772.04	1448.73	1883.25	2402.9	1479.23	2038.88	1664.88	1573.98	2566.78	1957.01	1860.47	1882.93	2183.51	2288.96	1928.4	1991.28	2177.49	1446.93	1863.9	1173.62	1540.6	1752.21	2220.93	1219.54	1680.59	1851.49	1762.8	1763.14	1902.55	1751.21	1793.76	1842.43	1648.69	2024.47	1989.21	2485.7	1961.12	1803.92	1989.23	1372.48	1857.74	1903.75	2028.22
feature_10942	Itk	53.3514	55.2804	80.8873	28.8193	54.0536	41.3477	41.2613	51.9147	38.23	35.5275	37.2836	64.6773	34.3073	36.7097	37.675	31.8469	44.6879	37.8856	52.9724	42.9549	34.227	57.789	54.6011	48.4129	54.7619	86.8529	51.7894	56.0788	62.9656	65.7745	36.8109	29.8202	60.6951	35.6043	71.2824	63.3712	30.2658	38.7826	15.1322	48.0021	38.1576	43.9672	11.9995	27.5365	51.3815	42.9428	52.3883	50.4147
feature_10969	Izumo4	865.36	1073.65	1691.28	1197.8	1062.32	1135.09	1111.31	1055.3	962.278	1136.88	1121.7	1267.9	929.415	1027.87	1018.27	966.706	1091.83	1013.67	829.9	1071.13	1249.29	1049.45	1107.77	1023.59	1073.76	1476.5	1222.81	1230.56	1020.71	1098.15	954.099	1225.19	1163.16	1083.65	1170.31	1064.11	999.718	1261.73	862.536	1043.57	1015.72	1203.6	1021.96	1122.39	1279.6	1052.1	1242.35	1181.84
feature_10973	Jag1	233.679	177.07	205.895	235.958	156.645	200.832	186.135	246.147	203.272	231.467	263.115	160.578	175.695	256.968	256.399	340.042	270.543	291.997	258.356	273.266	322.712	337.488	265.655	331.11	126.704	228.506	202.362	280.394	214.58	179.212	213.901	246.23	209.945	248.317	221.295	229.72	195.782	267.169	285.35	285.132	258.018	250.98	266.988	323.829	221.336	241.786	253.522	227.836
feature_10978	Jak3	121.641	151.157	201.299	103.569	101.488	116.167	143.039	108.305	81.1223	88.2804	123.568	150.542	76.9314	89.8422	64.8847	74.9942	129.232	108.113	116.167	105.102	151.577	43.9196	121.802	81.2645	151.401	110.634	127.555	139.668	99.4194	110.577	88.5452	207.89	121.39	122.333	90.4329	95.0567	105.93	122.381	90.7933	116.165	128.101	100.758	96.9958	83.7109	140.311	92.4203	96.357	110.524
feature_10982	Jam2	2892.71	1803.52	2345.73	1944.4	2098.16	2329.25	2005.3	2482.95	2673.31	2514.91	2576.83	2148.85	2109.38	2873.02	2461.43	2347.42	2149.85	2695.42	2740.62	2154.14	2037.73	3152.97	2000.29	2430.15	1422.74	1864.23	2100.35	2141.57	2056.32	1946.54	2271.33	2350.69	2406.91	2364.49	2172.52	2317.45	2193.33	2187.34	2519.51	2116.89	2646.51	2390.72	2667.88	2654.52	2083.92	2642.85	2500.6	2283.2
feature_10991	Jmjd6	758.657	927.674	1046.94	862.778	857.136	880.115	940.759	820.789	906.332	754.689	892.675	869.798	1242.34	1039.46	1117.69	1053	911.874	799.295	901.46	992.531	968.136	1012.46	963.919	908.606	915.92	894.378	850.689	796.742	1024.85	933.235	865.554	963.619	983.061	894.673	1057.53	1039.46	1169.96	1011.8	1093.84	1166.45	928.503	1032.31	1191.95	1023.26	1037.51	836.45	958.893	1075.19
feature_10995	Josd1	1515.18	1412.24	1572.71	1433.76	1519.02	1501.32	1826.5	1433.02	1700.77	1741.92	1601.06	1591.28	1850.51	1626.82	1552	1716.65	1508.52	1513.58	1354.05	1601.21	1430.2	1502.51	1677.93	1525.87	1692.25	1519.93	1470.24	1526.82	1673.56	1664.38	1611.72	1721.9	1391.01	1667.01	1494.8	1670.53	1666.51	1665.07	1663.46	1434.3	1501.78	1603.89	1522.93	1538.74	1487.1	1494.59	1411.68	1607.45
feature_11006	Jun	1966.53	2179.26	2034.13	1833.63	1640.36	1515.1	1796.24	1979.92	2634.14	2176.86	1898.27	1731.79	2433.74	2451.82	2585.97	1946.77	1568.91	1708.55	1847.53	1790.4	1913.05	1964.82	1852.24	1824.13	2936.74	2314.01	2447.53	2915.04	2917.13	2458.44	2525.03	2849.96	3079.53	2709.58	3009.82	2821.78	3010.5	2856.99	2867.56	3725.92	2877.27	3059.39	3266.86	2685.36	2595.75	2640.05	3289.24	2606.05
feature_11011	Kank1	1535.45	1229.13	1398.98	1108.64	1044.67	1081.93	1096.63	1334.57	1142.24	933.403	1635.15	1050.45	996.99	1437.47	1562.47	1383.8	1159.47	1460.91	1424.68	1212.79	1349.52	1497.89	1378.68	1519.82	1039.4	1107.37	1368.58	1535.29	1071.24	1094.34	1270.47	1407.51	1059.68	1368.48	1340.54	1434.65	1413.98	1503.9	1651.57	1585.03	1709.83	1401.46	1541.93	2034.39	1413.98	1580.48	1584.75	1772.27
feature_11013	Kank3	319.041	333.41	482.566	299.901	403.747	310.108	426.367	333.865	347.8	342.356	436.75	382.488	312.924	263.73	297.214	319.496	312.815	286.452	286.237	272.352	338.603	265.829	379.057	266.271	357.563	383.6	307.859	575.601	334.712	379.395	302.446	464.343	275.615	394.387	356.412	287.811	336.707	287.853	236.711	298.573	341.602	318.762	232.99	337.046	398.207	332.34	391.041	362.598
feature_11018	Kansl2	1455.43	1559.94	1581.9	1759.78	1645.88	1575.15	1589.94	1508.21	1584.22	1756.99	1621.3	1698.34	1586.45	1330.24	1494.44	1549.2	1415.52	1452.59	1351.26	1442.19	1602.56	1594.98	1443.78	1404.84	1560.18	1810.47	1669.73	1717.28	1573.31	1490.89	1548.05	1670.78	1571.11	1595.8	1643.75	1505.95	1402.63	1490.12	1602.93	1405.5	1415.47	1406.95	1545.93	1545.35	1540.46	1578.61	1540.78	1369.92
feature_11031	Katnal1	5315.93	5079.75	4689.63	5202.78	4801.95	5018.82	4984.37	5059.89	5138.68	5024.44	4909.71	4644.5	5703.32	5397.29	5983	6084.8	5611.35	5172.78	5444.07	5551.23	4807.68	5164.02	5116.75	5181.91	5976.56	5195.66	5365.96	5123.27	5521.09	5287.7	5170.44	5435.8	4977.99	5081.38	4863.16	5813.42	5741.05	5850.15	6247.44	6206.67	5579.19	4780.52	5045.78	5802.48	5108.51	5665.64	5177.08	5727.88
feature_11044	Kbtbd7	2635.56	2278.59	2199.58	2341.57	2180.9	2620.66	2417	2448.94	2470.97	2454.62	2442.61	2142.16	2640.62	2691.4	2697.95	2558.02	2641.41	2418.21	2501.78	2559.93	2375.11	2471.06	2352.05	2825.24	2667.23	2197.17	2543.44	2219.87	2673.55	2582.36	2434.49	2475.08	2578.05	2327.06	2245.93	2791.85	2596.24	2768.22	2848.1	3154.7	2514.77	2582.16	2773.88	2235.96	2426.79	2660.58	2716.71	2634.17
feature_11049	Kcna2	7541.75	6402.16	6800.05	5161.36	5900.67	7048.8	7213.4	6077.6	6746.2	7757.91	6804.78	5938.05	7319.92	7539.98	8235.12	8700.35	8084.88	7194.58	7841.77	7884.5	6835.63	7036.38	7170.59	7555.87	6788.33	6443.66	6745.09	5568.73	6326.38	6292.43	6190.2	5795.35	5857.57	6228.02	5606.84	7138.06	6596.06	6098.35	7837.41	7525.77	6582.19	7128.19	5728.75	7065.86	5694.45	7056.62	6063.01	6478.28
feature_11066	Kcnd3	4205.16	3665.78	3352.23	3996.88	3738.52	3708.5	3441.2	3873.91	3957.28	4386.03	4170.43	4081.36	4254.1	4494.04	5168.8	4112.35	4472.41	4063	4623.47	4389.62	4043.68	4320.3	4115.03	4561.19	4857.7	3940.43	4427.99	3683.21	5103.53	5175.21	4130.78	4697.96	4637.7	3942.95	3869.47	4744.04	4488.8	4743.55	5050.92	6518.68	4164.63	4995.78	4212.82	4813.37	4223.16	5076.58	4617.65	4994.93
feature_11078	Kcnh1	1522.65	1257.63	1251.92	1105.04	1675.66	1232.56	1435.89	1494.78	1312.88	1492.15	1564.84	1449.66	1624.92	1634.55	1472.46	1563.58	1587.02	1570.87	1560.36	1762.98	1211.39	1447.04	1588.68	1470.54	1840.43	1596.44	1733.03	1556.45	1594.02	1627.2	1601.77	1535.32	1204.95	1625.02	1735.25	2062.2	1731.77	1851.22	1955.3	1794.32	1808.85	1404.2	1705.93	2003.55	1713.38	2170.48	2056.24	1803.29
feature_11091	Kcnj10	22389.5	17371.9	20079.4	19159.4	17864.2	18778.7	16623.7	18618.6	20813.9	15195	18811.2	19051.9	17570.5	23951.1	23647.3	21804.8	20063.6	19921.4	21278.2	19549.9	20030.1	23568.7	20031.2	18839.5	15358	15959.2	17845.3	21934.2	18477.1	16081.4	21342.4	19159.1	18254.3	19223.6	20984.7	21499.5	21330.8	20493.6	24535.8	25015.8	24556.3	23163.4	23804	24307	17749.3	21431.2	22998.5	22904.7
feature_11097	Kcnj16	2838.29	1637.68	1842.94	2468.55	2080.51	2147.13	1927.36	2257.39	2207.09	2009.99	2016.51	1914.67	1923.29	2909.73	2027.12	2164.56	2292.37	3284.96	2455.32	2252.85	2328.66	2616.68	1851.19	2515.74	1567.69	1758.77	2258.59	2137.34	1800.32	1875.05	2379.78	2089.97	1729.31	2288.72	2093.79	2116.77	2162.11	2214.06	2284.97	1970.97	2486.61	2163.55	2333.9	2300.95	2063.16	2283.43	2220.89	2350.1
feature_11099	Kcnj3	2378.41	1444.2	2297.94	1863.35	2207.37	2068.37	2160.26	2202.79	2455.11	2443.86	2191.21	1688.3	2362	3054.63	1798.98	2370.02	2331.02	3164.84	2417.21	2368.91	1833.59	2459.5	2089.54	2475.11	2157.19	1968.67	2436.02	1879.17	2232.79	2144.82	2035.54	2478.49	1858.66	2275.94	1829.94	2364.1	2243.45	2303.69	2875.12	1993.05	2520.22	2210.27	2433.89	2443.04	2293.39	2441.2	2016.95	2076.7
feature_11105	Kcnk1	1390.34	1178.16	1270.3	1191.5	1341.41	1329.03	1445.98	1545.8	1415.44	1598.74	1449.8	1352.65	1649.87	1796.84	1503.86	1425.92	1439.67	1467.38	1303.86	1509.82	1277.4	1361.51	1252.67	1342.59	1432.4	1386.54	1396.4	1517.3	1427.5	1465.15	1492.33	1305.27	1464.64	1564.77	1602.26	1401.21	1649.49	1495.29	1587.8	1246.13	1499.96	1400.54	1509.93	1257.87	1338.88	1397.51	1175.93	1435.85
feature_11106	Kcnk10	114.172	93.2857	185.673	172.015	138.995	143.733	139.372	153.059	134.271	218.548	151.265	141.621	155.942	173.888	241.748	206.491	179.959	158.935	172.857	174.561	171.135	182.613	152.253	163.394	176.097	127.177	155.368	114.274	164.87	145.848	175.101	153.361	187.06	135.114	145.757	152.267	154.166	184.433	190.234	156.487	198.056	188.693	160.993	176.233	144.263	189.508	151.552	177.421
feature_11127	Kcnn2	470.559	451.745	466.94	567.38	544.949	584.775	653.763	505.721	582.775	513.533	623.168	601.053	493.817	766.073	666.638	669.811	536.254	535.019	491.621	425.893	630.755	540.905	571.211	504.877	365.079	367.057	325.122	266.639	542.664	463.281	454.664	508.648	479.591	489.331	455.356	502.568	527.76	501.589	600.965	537.623	499.683	439.672	473.979	447.192	515.791	381.817	445.3	538.08
feature_11141	Kcnt2	533.514	462.973	499.112	400.768	514.061	531.613	428.201	442.17	465.288	596.431	462.316	428.208	644.561	586.389	801.64	468.457	607.513	549.804	537.158	584.003	422.948	568.643	514.51	576.632	748.413	787.88	890.011	778.754	755.587	679.67	655.632	602.368	556.206	544.107	785.171	926.803	728.271	932.507	848.485	1211.57	663.216	694.316	657.971	864.645	828.033	992.351	1387.35	1045.13
feature_11142	Kcnu1	140.848	133.018	102.947	133.289	109.21	97.4625	120.116	121.731	101.636	72.1315	109.72	120.434	71.7334	98.5366	82.6757	74.9942	86.9602	92.404	120.814	95.963	112.46	87.8392	103.952	101.148	86.9748	122.008	117.006	106.867	113.504	121.063	83.5707	86.9046	107.46	76.6863	76.602	87.1353	91.7432	93.0783	86.4698	98.8843	92.6686	135.566	74.9967	66.0875	96.8344	104.556	78.5824	100.829
feature_11149	Kctd12	2820.16	1861.4	2371.47	2195.67	2189.72	2269.2	2163.01	2806.97	3128.34	2313.59	2741.94	2052.95	2744.58	3615.91	2850.74	2680.27	2735.62	3453.14	2718.32	2729.92	2486.35	2320.81	2443.4	2771.64	2368.72	2264.38	2971.18	2552.11	2227.82	2032.34	2397.68	2407.77	2157.16	2667.59	2650.22	3060.3	2561.24	2390.73	3238.29	2424.11	2890.9	2423.69	2821.88	2879.21	2371.45	2680.19	2935.61	2745.66
feature_11160	Kctd21	595.402	520.845	688.461	536.759	464.42	522.753	650.095	516.462	570.653	561.98	558.188	558.678	709.017	550.645	573.497	628.719	496.398	606.17	618.011	682.708	650.314	755.88	607.962	595.652	648.553	550.068	515.017	514.232	674.395	522.383	490.48	512.056	583.071	514.894	563.876	460.321	595.858	576.569	678.788	709.471	589.626	691.568	606.974	627.831	516.779	531.183	569.723	662.177
feature_11166	Kctd8	373.46	407.693	387.891	464.711	329.837	417.415	479.549	412.632	511.91	521.069	525.166	592.132	537.48	386.418	750.36	556.806	382.866	342.819	492.55	424.065	488.958	492.362	437.859	573.174	474.603	389.804	475.695	399.958	650.368	572.905	594.944	540.172	674.611	549.585	505.36	480.565	516.41	496.418	564.216	649.948	442.447	578.902	542.976	365.684	514.803	444.364	613.691	571.043
feature_11175	Kdm1b	421.476	328.227	410.871	415.178	371.757	376.067	363.1	396.521	365.516	354.198	430.359	441.59	497.975	492.683	456.286	403.736	431.177	449.083	425.638	424.065	455.953	476.181	452.559	459.058	345.752	346.378	412.397	328.008	429.16	412.759	402.93	378.291	384.071	365.173	425.567	454.16	429.396	399.03	440.996	499.222	505.135	353.57	430.981	371.192	410.064	415.424	386.364	414.951
feature_11183	Kdm4d	78.9601	101.923	95.5941	93.6627	79.4257	66.9439	94.4426	83.2425	58.7437	67.8252	83.0891	85.8647	57.1788	55.0645	41.8611	51.3659	68.8435	60.0626	78.0645	53.9221	59.8973	34.6734	92.4018	44.9548	90.1961	74.4453	87.2748	77.2406	91.1344	70.5408	87.5503	100.537	59.7001	68.4699	73.4103	74.8132	60.5316	84.46	39.9923	75.8433	66.3216	68.6988	42.9981	50.6671	83.989	68.1483	59.8723	61.0793
feature_11193	Kdsr	1996.41	2164.57	1801.58	1802.11	2101.47	2179.61	2201.52	1964.7	1906.84	2076.74	2076.16	2200.14	1955.51	1816.16	2106.66	1747.47	1812.88	1683.6	1848.46	1760.24	1785.92	1800.7	1689.48	1970.23	1814.66	1830.11	1766.59	1434.77	2082.84	1752.08	1978.84	1527.65	2088.51	1754.65	1920.37	1850.97	1643.81	1776.24	1613.74	1809.68	1630.79	1677.17	1578.93	1480.36	1559.23	1647.69	1756.88	1621.03
feature_11204	Khdrbs3	3475.31	2846.94	3194.13	4090.54	3020.38	2990.82	3532.89	3231.24	4250.06	4021.06	2999.73	2976.27	3455.68	4182.97	3750.75	3224.75	3711.51	3840.31	3547.29	3753.52	3948.33	4250.96	3314.91	3787.45	3782.87	3366.58	3613.75	4115.97	4147.44	3616.64	3511.96	3694.3	3873.54	3339.5	3996.07	3714.25	3851.32	4550.5	3630.65	4272.19	3894.81	4726.48	4225.82	3350.64	4199.45	3976.87	4185.45	3665.73
feature_11240	Kif3c	7790.37	7805.77	8044.61	8350.39	8443.4	7481.97	8287.11	8075.42	7425.02	8463.07	8076.68	7958.65	9471.92	8748.5	9443.86	10300.9	8878.39	8333.92	8471.86	9267.28	7924.78	8751.56	9433.38	8377.16	9899.02	8220	8900.11	8358.91	9018.99	8731.8	8491.38	9706.06	7859.52	8876.44	8482.61	9808.45	9181.89	9920.6	10048.9	10045.9	9369.52	8272.25	8781.62	10149.9	9089.58	9916.04	8844.26	9203.59
feature_11244	Kif5b	19408.2	14360.8	16127.8	13415.4	15442.8	16334.3	14569.8	14783.2	16395.1	15397.4	17080.1	14533.4	16525.7	18275.6	17328.4	16739.1	15975.3	19914	18173.2	15584.4	16812.8	17202.6	15170.7	18186	11649.3	12674.3	15676.8	17469.1	15522.7	13417	15222.8	14868.4	15711.1	14581.3	14708.7	14977.6	15924.5	14703.8	18391.1	15911.7	16921.1	16246.8	15234.3	16824.8	13580.5	16290.2	15963.5	16306.2
feature_11258	Kirrel2	37.346	33.6865	84.564	26.1175	54.0536	82.6954	85.2734	94.8785	144.528	50.5997	121.438	156.118	190.249	177.752	135.002	158.207	66.4279	133.986	97.5807	116.983	97.7915	92.4624	129.153	51.871	45.098	41.3585	44.1169	59.253	82.8495	67.681	113.417	147.397	113.43	122.333	153.204	131.143	244.964	112.039	168.616	99.8443	85.4004	104.422	154.993	104.639	67.1912	96.1544	62.6788	91.1342
feature_11259	Kirrel3	1364.73	1746.52	1580.06	1585.96	1257.57	1470.8	1750.4	1446.45	1030.35	1846.35	1398.67	1489.81	1199.71	1039.46	1415.95	1477.28	1350.3	1149.51	1484.16	1518.04	1557.33	1391.56	1607.58	1463.63	1845.8	1670.88	1744.54	1595.6	1313.16	1493.75	1470.45	1279.71	1288.53	1416.87	1480.97	1495.38	1384.66	1432.37	1283	1536.07	1465.44	1464.66	1265.95	1575.09	1497.97	1616.89	1566.97	1437.79
feature_11267	Klb	188.864	366.233	131.442	67.5452	197.461	274.667	271.408	180.806	251.759	74.2847	198.135	258.709	144.506	77.2836	120.351	122.251	59.1812	43.4299	156.129	65.8032	84.3452	50.8543	54.6011	85.5871	40.803	106.498	52.7485	16.9294	73.736	86.7461	51.7342	21.3002	136.315	70.2957	48.9402	34.326	64.3149	33.6116	21.6175	45.122	37.2491	54.959	36.9984	15.4204	31.6194	40.1421	52.3883	41.6891
feature_11270	Klc3	50.1503	116.607	90.9982	69.3464	83.8383	76.7886	57.7659	94.8785	60.6086	76.4379	73.5019	79.1739	45.743	37.6757	42.9076	31.8469	65.2201	56.3664	64.1244	56.6639	42.7838	78.593	61.9512	51.871	68.7208	67.2076	95.9063	100.519	45.5672	65.7745	57.7036	121.837	59.7001	83.9897	86.1773	71.2926	69.0439	65.4996	41.0732	48.9621	94.4856	77.8586	43.9981	78.2036	109.68	50.4111	81.3889	77.561
feature_11274	Klf11	534.581	510.48	270.237	384.557	343.075	393.788	431.869	432.324	315.165	354.198	450.598	370.222	283.815	253.104	358.959	295.868	367.165	326.186	381.029	241.278	353.272	305.126	342.307	319.006	428.431	407.381	457.473	482.489	487.155	387.974	379.053	339.951	367.156	343.262	357.476	299.253	314.954	298.195	290.755	380.176	377.034	293.115	361.984	298.495	384.373	399.554	446.236	411.073
feature_11278	Klf15	574.061	698.779	859.428	588.094	656.365	715.709	800.47	819.894	826.142	689.018	956.59	926.67	814.018	892.625	879.083	831.1	643.747	691.182	654.255	691.847	576.97	584.824	727.664	608.619	651.774	678.28	705.871	935.352	797.012	878.9	749.152	1068.42	684.561	953.101	877.731	809.743	980.802	729.114	1022.51	755.553	903.973	708.972	854.963	906.5	755.901	652.543	681.983	914.251
feature_11285	Klf6	1530.12	1109.06	1100.25	1604.87	1292.87	1420.59	1496.41	1453.61	1722.22	2210.24	1514.78	1321.42	1666.5	1741.78	1566.65	1399.21	1379.28	1511.73	1415.38	1412.03	1516.99	1692.06	1429.08	1650.36	1285.29	1173.55	1360.91	1380.81	1416.73	1338.37	1281.42	1427.11	1486.53	1429.65	1455.44	1396.81	1426.28	1584.92	1565.1	1625.35	1505.41	1493.97	1612.93	1331.66	1466.35	1403.11	1587.55	1521.17
feature_11293	Klhdc4	818.411	1104.74	1104.85	977.154	1126.3	884.053	933.423	1066.94	873.696	1060.44	1047.14	1013.65	831.691	834.663	841.408	955.406	844.238	888.927	814.102	800.605	900.904	862.211	1037.42	810.916	1112.42	1091.86	988.794	1106.76	1130.07	1006.64	990.91	1019.85	1099.48	912.932	1171.37	930.324	987.422	949.744	888.477	866.918	935.771	907.74	918.96	1024.36	1039.49	842.051	890.601	894.86
feature_11298	Klhdc9	327.578	456.927	353.882	304.404	357.416	281.558	316.337	351.767	274.137	352.045	338.748	365.761	218.319	217.36	214.538	278.403	312.815	315.098	253.71	296.114	242.034	228.844	338.107	230.826	325.35	353.615	281.965	359.751	304.058	326.966	349.206	357.843	313.425	370.65	323.431	359.103	259.151	261.136	259.409	287.052	291.633	249.148	258.989	313.916	347.813	357.545	381.686	308.305
feature_11299	Klhl1	910.175	699.643	849.317	1211.31	688.356	582.806	532.73	786.776	773.925	1065.82	574.167	576.52	621.689	826.934	914.665	640.019	832.16	1050.63	902.389	882.859	678.429	894.573	940.818	940.594	1547.29	1159.07	1203.62	902.551	1446.55	1041.91	812.825	1119.54	636.801	875.502	1055.41	1166.21	992.151	1066.09	953.33	1355.58	1410.02	1125.74	989.957	1077.23	1057.27	1502.06	1227.38	1438.76
feature_11308	Klhl2	3278.98	2906.54	3310.87	3053.04	3096.5	2903.2	3501.71	3274.2	3470.54	2891.72	4045.8	3278.47	3154.19	3922.14	3378.19	3622.32	2939.74	3959.51	3363.28	3463.81	3184.34	3166.84	3042.96	3316.28	2943.18	2708.98	3004.74	3607.03	3114.31	3038.02	3181.66	3908.15	3015.85	3303.9	2919.39	3186.16	3421.93	3143.98	4300.79	3171.98	3787.6	3292.05	4491.81	4058.87	3045.34	3534.38	3218.14	3364.21
feature_11314	Klhl25	332.913	332.546	417.305	385.458	344.178	317.984	330.091	325.809	317.962	271.301	290.812	328.962	373.221	426.992	410.239	383.19	378.035	387.173	376.383	338.155	375.275	397.588	395.858	392.49	380.112	296.747	318.409	395.726	431.646	394.647	407.905	358.695	351.236	345.088	348.965	387.268	434.125	398.168	416.136	485.781	407.015	457.076	494.979	440.583	401.171	376.216	425.655	477.97
feature_11332	Klhl6	41.6141	20.7302	27.5752	38.7259	29.7846	44.3011	50.4305	47.4393	64.3384	41.987	41.5445	54.6412	39.5053	54.0985	51.2798	48.2839	60.389	67.4549	42.7496	75.8565	78.2332	94.7739	46.2009	59.6516	38.6555	32.0528	55.6257	37.0331	41.4247	43.8497	33.8262	56.2324	32.835	40.169	61.7072	34.326	39.7239	56.0194	51.8819	34.5615	59.962	76.0267	44.998	50.6671	29.6432	32.6738	46.7752	38.7805
feature_11334	Klhl8	959.258	1151.39	1111.28	1075.32	1139.54	1073.07	1064.54	1098.26	1117.06	1112.12	1109.98	1020.34	1421.15	1189.2	1474.56	1347.84	1175.17	1113.47	1259.26	1340.74	1248.06	1218.19	1211.72	1278.62	1456.02	1247.99	1202.67	1315.21	1325.59	1270.69	1262.51	1299.31	1144.25	1328.32	1492.68	1482.18	1462.22	1464.26	1360.82	1532.23	1362.77	1330.92	1428.94	1328.36	1525.64	1406.84	1423.84	1349.56
feature_11422	Kras	4712	3768.57	3696.92	4428.26	3994.45	4668.35	4266.42	4362.62	4877.59	4823.12	4253.52	3804.81	4905.94	5110.38	5115.43	4594.17	4716.38	4731.09	4631.83	4375	4439.74	4565.33	3938.63	4592.31	4205.93	3864.95	4386.76	4052.48	4585.72	4143.79	4403.38	4150.97	4594.92	4120.06	4115.23	4618.17	4421.65	4576.35	4917.97	4583.24	4572.56	4267.57	4448.81	4171.22	4179.69	4740.51	4274.32	4152.42
feature_11551	L3mbtl3	1025.41	798.111	801.52	1224.82	908.983	1020.89	892.162	843.166	977.197	1186.4	887.349	866.453	1384.77	1288.7	1205.6	1170.12	1212.61	1169.83	1078.96	1245.69	991.362	1250.55	1096.22	1049.52	1125.3	994.672	1030.03	887.737	919.629	1000.92	892.416	1053.93	821.871	972.272	863.9	1223.42	1158.61	1213.47	1300.29	1259.57	1182.89	1023.15	1092.95	1092.65	1067.15	1226.67	907.44	1156.63
feature_11577	LOC432842	94.9655	130.427	125.927	102.669	79.4257	85.6488	138.455	104.724	110.028	120.578	96.9373	111.513	84.2087	89.8422	108.839	93.4859	95.4146	99.7963	66.9125	102.361	134.463	104.02	142.803	101.148	100.934	88.9208	110.292	158.713	99.4194	81.9798	76.6065	123.541	87.5601	92.2061	95.7525	95.0567	75.6645	90.4928	82.1463	96.0042	94.4856	53.1271	63.9972	118.958	127.466	117.626	96.357	95.9818
feature_11598	Lamc1	1210.01	1164.34	1032.23	1087.03	1227.79	1304.42	1045.29	1169.87	1145.97	1109.96	1467.91	1200.99	1196.6	1128.34	1282	1293.39	1143.77	1123.63	1340.11	1189.94	1026.81	1125.73	1152.92	1137.7	981.419	1051.54	1159.51	1300.39	1032.3	1098.15	1180.93	1186.84	1222.86	1192.29	1200.1	1201.41	1215.36	1231.56	1357.58	1285.5	1430	1128.49	1086.95	1390.04	1080	1204.26	1145.99	1137.24
feature_11599	Lamc2	90.6974	68.2368	60.6655	83.7561	107.004	57.0992	111.864	53.7048	102.568	138.88	80.9586	79.1739	96.6841	71.4873	41.8611	106.841	71.259	79.4674	62.2658	86.8237	66.0093	55.4774	48.3009	46.6839	66.5733	62.0378	55.6257	68.7758	53.0237	82.9331	100.484	56.2324	44.7751	50.2112	63.835	60.7307	34.049	40.5063	47.5584	69.123	50.8769	63.2029	34.9985	53.9715	47.4291	52.2781	36.4847	52.3537
feature_11608	Lamtor4	571.927	638.316	681.108	660.142	676.222	537.52	584.077	648.933	676.019	550.137	598.667	612.204	572.827	595.084	495.007	517.768	573.695	606.17	511.137	532.823	631.978	580.201	586.961	644.064	718.347	676.212	584.069	708.92	634.627	550.981	621.806	644.117	641.776	647.269	607.497	528.093	579.779	617.937	559.892	534.743	610.522	646.685	698.97	578.266	694.638	577.86	595.917	718.409
feature_11614	Lap3	2982.34	2365.83	2341.14	2581.13	2683.93	2223.92	2396.83	2725.52	2472.83	2513.84	2512.91	2019.49	2044.92	2365.84	2186.2	2035.12	2311.69	2949.54	2585.42	2298.54	2657.48	2965.73	2407.7	2756.08	2118.53	2245.77	2572.21	2593.38	2276.7	2201.06	2596.66	2336.2	2213.88	2358.1	2057.62	1936.34	2123.34	2226.99	2180.12	1902.8	2987.2	2581.24	2696.88	2646.81	2440.62	2495.35	2408.93	2560.48
feature_11620	Larp1b	344.65	242.716	379.619	383.657	394.922	321.921	429.118	394.731	461.558	527.529	316.378	421.518	460.549	432.788	315.005	415.036	420.307	511.918	350.361	429.549	341.048	464.623	333.906	368.284	414.472	359.819	362.526	336.473	367.023	408.946	385.022	507.796	451.731	424.513	355.348	390.789	449.258	451.602	352.365	342.735	397.93	404.865	308.987	350.264	393.266	303.4	339.588	327.695
feature_11632	Lats2	599.67	474.202	625.038	525.952	505.236	501.095	561.154	613.13	687.208	662.103	663.647	576.52	690.304	742.888	623.73	651.32	533.839	708.739	662.619	582.175	563.524	614.875	574.361	553.29	516.48	439.434	540.912	732.198	483.012	556.7	555.148	624.521	592.026	652.746	577.707	689.161	874.871	542.095	794.441	713.311	737.714	553.254	750.967	786.441	482.196	584.395	526.689	695.141
feature_11668	Lcmt2	369.192	336.865	296.893	385.458	412.573	387.881	329.174	454.701	290.921	363.887	382.423	396.985	228.715	249.24	318.144	272.239	382.866	331.73	362.443	357.348	312.933	337.488	283.506	318.142	406.956	326.732	369.239	394.668	335.54	265.004	313.39	310.13	297.505	321.352	341.517	292.211	228.885	312.847	296.159	305.293	312.529	381.049	306.987	291.887	334.968	365.947	390.106	281.159
feature_11681	Lcp1	316.907	169.296	221.521	218.847	227.246	251.04	201.722	277.475	303.975	226.084	268.442	217.45	213.121	251.172	217.678	200.327	304.361	339.123	381.959	290.631	287.263	263.518	321.306	289.613	234.08	264.694	310.736	258.174	270.918	215.435	203.952	287.978	231.835	223.668	250.02	171.63	221.319	204.255	231.307	191.048	401.564	298.611	270.988	294.089	193.669	291.264	209.553	269.525
feature_11697	Ldlrad3	430.012	329.091	352.963	398.967	418.088	293.372	338.343	377.724	343.138	303.598	363.248	269.86	242.23	353.572	320.237	245.529	349.048	407.502	433.072	321.704	400.945	418.392	324.456	408.052	306.022	398.076	411.438	408.423	329.741	278.35	326.324	339.951	300.49	335.046	359.604	317.736	317.791	315.432	302.644	328.334	405.198	324.258	383.983	374.496	320.146	345.409	379.815	356.781
feature_11712	Lemd3	2175.67	2400.38	2206.94	2050.67	2119.12	2297.75	2286.8	2255.6	1835.04	2228.54	2346.73	2317.23	2200.86	2029.66	2413.29	2264.21	2013.37	1722.41	1969.27	1887.27	1988.84	1872.36	1856.44	2146.59	2146.45	2004.85	2006.36	1787.11	1890.62	2039.01	1982.81	2096.79	2018.86	1871.51	1733.12	2280.48	1990.92	1986.53	2041.77	2184.09	1767.06	1736.71	1842.92	1884.6	1870.48	2011.77	1941.17	1957.45
feature_11715	Leng8	3350.47	5948.69	9213.8	3418.69	2786.52	4965.66	4386.54	3710.11	3619.73	3192.09	5319.83	7183.64	2511.71	3262.33	4433.09	3956.2	3244.1	3473.47	3198.79	3087.27	5750.14	2621.31	3971.18	2861.55	4411.02	8586.03	5223.06	6525.24	4226.98	4467.9	3627.37	5491.18	4084.48	4114.58	5021.69	4620.81	3741.61	3943.76	3828.45	5305.19	3081.68	3152.82	3450.85	5799.18	4476.12	3794.83	5705.64	5191.74
feature_11722	Letm1	3524.39	4060.52	3854.1	3568.19	4061.74	3609.06	3869.4	3721.75	3586.16	4031.83	4148.06	4059.06	4094	3706.71	4289.72	4353.77	3792.43	3941.03	4024.04	4064.26	3912.88	4142.31	4155.98	3926.63	4150.09	3833.93	3990.66	4233.42	4350.43	3866.4	3990.5	4066.63	4130.25	3963.95	4270.56	3961.58	4290.18	4265.23	4162.44	4400.83	4275.47	4193.37	4011.83	4072.09	3967.24	4075.83	3646.6	3713.23
feature_11725	Lfng	915.51	966.543	1206.88	733.091	1066.73	901.774	933.423	1275.49	1011.7	742.847	1415.71	1145.23	791.146	930.301	980.596	1093.07	735.538	894.471	974.877	929.47	826.338	753.568	958.669	823.884	941.69	887.14	890.011	1336.37	1149.95	1072.41	1113.28	1293.35	1097.49	1292.71	1392.67	1007.78	1353.45	859.251	1186.8	976.362	1169.26	1036.89	1218.95	1240.24	982.177	879.393	1083.31	1040.29
feature_11729	Lgals3	66.1557	80.3293	37.6861	73.8494	78.3226	76.7886	71.5197	76.0819	90.4467	55.9827	56.458	78.0588	82.1295	49.2683	54.4194	49.3113	61.5968	60.0626	57.6191	37.4713	70.8989	99.397	38.8508	39.7677	42.9505	103.396	46.9941	176.701	36.4538	90.5591	63.6729	48.5644	49.7501	67.557	86.1773	55.4498	59.5858	50.8484	24.8601	54.7224	59.962	50.3791	40.9982	50.6671	56.322	52.2781	67.3564	61.0793
feature_11736	Lgalsl	3324.86	2605.95	2581.04	3118.79	2972.95	3456.47	3160.62	2926.91	3749.34	3306.21	2908.12	3069.94	3769.64	3736.66	3933.9	3253.52	3300.86	3445.75	3446.92	3157.64	3395.81	3629.15	2908.56	3566.99	2688.7	2729.66	2980.77	2650.52	3663.6	3103.79	3181.66	3010.99	3493.45	3019.98	3101.32	3102.55	3193.04	3077.62	3407.99	3485.91	2838.2	3467.92	2955.87	2416.6	2790.41	2851.03	3016.07	2946.35
feature_11738	Lgi2	558.056	378.325	457.749	635.826	528.402	373.114	460.293	477.973	496.99	653.49	364.314	346.804	528.124	482.056	583.962	543.451	699.305	585.841	565.039	600.454	603.863	686.533	588.011	631.961	689.356	558.34	556.257	489.896	506.21	414.665	463.618	501.832	488.546	519.458	360.668	539.535	507.898	542.957	619.34	658.589	781.323	509.287	381.983	559.541	582.982	662.812	674.499	630.183
feature_11742	Lgr4	1051.02	866.348	936.638	1018.58	985.1	1064.21	947.177	941.625	1149.7	967.854	1041.81	998.038	1125.9	1206.59	1136.53	1046.84	849.069	1069.11	958.149	921.245	968.136	989.347	804.316	1057.3	842.904	954.348	927.414	914.19	903.888	887.479	1110.3	922.723	1098.48	939.407	773.468	1055.31	1022.42	1034.2	1099.25	1072.37	1003	981.019	1025.96	999.023	810.247	1001.69	884.988	1099.43
feature_11744	Lgr6	108.837	131.291	101.109	137.792	97.0759	89.5867	73.3535	57.2852	55.9464	62.4422	67.1104	89.2101	68.6145	39.6078	42.9076	83.2127	99.0379	81.3155	89.2166	61.2335	66.0093	57.789	105.002	57.0581	106.303	88.9208	70.9707	69.8339	37.2823	58.1485	63.6729	148.249	97.5101	96.7708	60.6433	110.019	65.2607	76.7034	71.3376	58.5625	103.571	61.3709	136.994	169.625	75.096	252.055	95.4215	72.7135
feature_11745	Lgsn	2.13406	1.72751	0	1.80121	2.20627	4.92235	4.58459	5.37048	3.72976	3.22977	7.45671	6.69076	21.8319	1.93209	11.5118	7.19122	1.20778	0.92404	0	0	0	4.62312	0	3.45806	2.14753	0	9.59063	0	5.79946	0	6.96423	0	18.905	4.56466	1.06392	7.92139	6.62065	2.58551	0	3.84017	0	2.74795	7.99965	0	0	1.86708	1.87101	0
feature_11746	Lhb	22.4076	36.2778	29.4136	17.1115	26.4752	16.736	22.0061	18.7967	49.4193	22.6084	22.3701	28.9933	41.5846	23.1851	18.8375	33.9015	15.7011	11.0885	13.0108	10.0533	26.8927	11.5578	8.40016	6.91613	19.3277	27.917	14.3859	46.556	20.7124	37.1769	24.8722	23.0042	32.835	41.0819	65.9628	35.2062	49.1819	22.4077	25.9409	41.2818	41.7917	28.3955	27.9988	46.2613	20.7502	17.7372	34.6137	29.0854
feature_11766	Lifr	1124.65	816.25	1125.07	988.862	1111.96	1092.76	1123.23	1115.27	1465.8	1125.04	1230.36	1275.7	1263.13	1677.05	1205.6	1120.8	1045.94	1292.73	1193.27	998.015	1035.37	1262.11	1048.97	1156.72	845.051	783.744	1070.31	1251.72	1289.14	1038.09	1088.41	1166.4	1096.49	1187.72	1071.36	1276.22	1309.94	1069.54	1374.87	1038.77	1090.22	1000.25	1098.95	1033.17	1003.92	968.079	955.151	1148.87
feature_11776	Limch1	4459.11	3131.12	3835.71	3790.64	3513.49	3696.68	3498.96	3686.84	3659.83	3439.7	4196	3140.19	3553.4	4463.13	3892.04	4084.62	4141.48	4424.3	4464.55	4154.74	4010.67	3867.24	3879.83	4134.12	3710.92	3869.09	4228.51	3721.3	3584.07	3508.93	3579.61	4325.64	3600.91	3626.17	3458.79	4149.05	3812.55	3741.23	4439.14	4139.7	4280.02	3789.43	4009.83	4752.79	3435.64	4604.21	3969.35	4167.94
feature_11788	Lin54	454.554	494.069	438.446	345.832	444.563	474.514	478.632	422.478	549.207	457.551	494.273	470.583	562.431	517.8	527.45	452.02	467.411	460.172	493.479	429.549	469.399	413.769	459.909	496.232	427.358	424.959	470.9	405.248	511.181	471.86	531.271	392.775	516.406	466.508	445.781	469.123	469.12	504.174	544.76	509.782	455.166	479.976	408.982	388.815	448.6	478.905	507.044	491.543
feature_11792	Lin9	208.07	196.936	162.694	317.012	270.268	283.527	266.823	234.511	211.664	243.309	207.723	269.86	315.003	283.051	281.516	286.622	243.972	220.846	228.618	306.168	223.698	219.598	223.654	264.542	227.638	168.536	231.134	173.527	281.688	248.799	262.651	212.15	239.795	240.101	211.719	227.08	231.723	274.064	242.116	250.571	222.586	239.072	221.99	211.48	182.8	234.318	204.876	222.988
feature_11798	Lingo1	4364.14	7414.48	5322.02	3112.48	4140.07	4536.43	5915.04	4685.75	2993.13	3215.77	5392.27	4421.47	3521.17	2635.37	4935.42	4795.52	3735.66	2578.07	4035.19	3625.57	3839.54	3582.92	4574.94	4179.07	5115.41	4409.85	4031.9	4838.65	4254.32	4202.89	4305.88	4041.07	3572.06	3706.5	4350.36	4174.58	4027.24	3158.63	3723.61	5236.07	3609.53	4042.24	3433.85	4073.19	3975.15	3866.72	4695.3	3834.42
feature_11803	Lipa	1268.7	833.525	975.244	1138.36	1008.27	1033.69	1019.61	968.477	966.008	1032.45	956.59	889.871	1130.06	1107.09	1127.11	953.351	1137.73	1182.77	1173.76	1306.92	1090.38	1188.14	1125.62	1210.32	1038.33	898.514	1039.62	881.389	1079.53	991.384	830.733	889.495	910.426	953.101	827.727	904.799	1065.92	1079.88	1101.41	1007.08	1059.33	1166.05	1131.95	880.065	925.855	1005.42	863.471	1015.08
feature_11826	Lman2l	2716.65	2286.36	1908.21	2466.75	1953.65	1728.73	1901.69	1965.6	1531.07	1468.47	1722.5	1691.65	1674.82	1715.7	2279.34	2233.39	2417.98	1938.64	2170.01	2294.89	2145.3	2209.85	2817.2	2228.72	2720.91	2026.57	2002.52	2118.3	2186.4	2101.92	1893.27	2223.74	1953.19	1800.3	1884.2	1853.61	2224.54	2186.48	2184.44	2714.04	2526.58	2583.99	2798.88	2520.14	2260.79	2632.58	2418.28	2640.95
feature_11827	Lmbr1	1632.55	1407.92	1581.9	1519.32	1617.2	1737.59	1710.97	1644.26	1496.57	1772.07	1587.21	1557.83	1748.63	1560.16	1733.05	1660.15	1572.53	1624.46	1585.45	1594.81	1394.75	1562.61	1521.48	1680.62	1565.55	1545.77	1568.07	1412.55	1621.36	1630.06	1529.15	1584.73	1648.72	1486.25	1534.17	1663.49	1501	1629.73	1520.79	1441.02	1507.23	1478.4	1403.94	1343.78	1549.35	1457.25	1423.84	1480.45
feature_11834	Lmln	740.517	777.381	613.089	612.41	653.056	699.958	659.265	725.015	655.505	473.7	743.541	843.035	867.038	777.666	936.642	914.313	823.706	614.487	723.026	753.081	642.979	647.236	665.713	627.639	834.314	782.71	704.911	688.817	812.753	758.79	797.901	750.618	748.241	756.82	657.501	906.56	780.291	835.981	866.86	985.963	685.929	625.617	575.975	912.008	644.245	734.695	695.08	797.909
feature_11845	Lmod2	0	8.63756	13.7876	1.80121	6.61881	19.6894	17.4215	2.68524	0.93244	6.45954	3.19573	4.4605	4.15846	0.966045	2.09305	0	1.20778	0	1.85868	9.13933	3.66718	0	0	2.59355	2.14753	0	0.959063	0	0	3.81301	0	0.852006	1.99	0	3.19175	0	0.945807	0.861836	0	0	0	0	0	0	0	1.86708	1.87101	1.93903
feature_11847	Lmtk2	3264.04	3325.46	3238.25	2812.58	3064.51	3271.39	3416.44	3144.42	3002.46	3159.79	3276.69	3104.51	3668.8	3357.97	3952.73	4410.28	3372.12	3118.64	3361.42	3471.12	2761.39	2935.68	3585.82	3275.65	3804.34	3169.1	3309.73	3263.15	3231.96	3539.43	3388.59	3439.55	3046.69	3343.16	3151.32	4094.48	3880.64	3561.97	4188.38	4485.31	3625.88	3277.39	3267.86	3865.02	3290.39	3737.89	3307.95	3703.54
feature_11859	Lonrf1	927.247	1071.06	911.821	902.404	972.965	1130.17	1269.93	1052.61	984.657	994.769	922.502	1068.29	868.078	873.304	891.641	892.739	865.978	852.889	814.102	972.425	866.677	883.015	805.366	837.716	998.599	1081.53	1114.43	942.758	1202.15	988.524	1148.1	961.915	1295.49	904.715	966.036	1207.57	924.053	931.645	920.904	989.803	803.128	827.133	920.96	889.979	983.165	928.871	1029.06	850.263
feature_11876	Lpcat2	379.862	336.865	426.497	491.729	505.236	481.405	398.86	407.262	381.368	385.419	439.946	403.676	269.26	408.637	317.098	320.523	428.762	490.665	382.888	385.68	383.832	448.442	382.207	432.258	338.235	507.676	499.672	394.668	458.158	397.507	404.92	378.291	352.231	459.205	370.243	346.781	342.382	353.353	328.585	262.091	409.74	338.914	438.981	408.641	408.088	374.349	368.589	355.811
feature_11882	Lpin2	4479.38	4324.83	4317.36	4533.63	4334.22	4607.32	4552.5	4456.61	4119.52	4433.4	4347.26	4283.2	5176.24	4854.37	5921.25	5315.34	4831.12	4554.59	4875.32	5055.88	4522.86	4796.48	4701.99	4655.42	5454.71	4997.14	4984.25	4748.71	5358.7	5040.8	4977.43	5159.75	5045.65	5030.25	4785.5	5516.81	5577.42	5363.21	5544.88	6403.48	5255.76	5193.63	4698.8	5310.13	4950.41	5628.3	5321.15	5319.72
feature_11891	Lppr4	6132.21	5930.55	5506.77	5599.95	5453.9	6479.78	6409.26	5546.81	6439.43	6737.3	6247.66	6264.78	6859.37	6190.41	7367.55	6394.03	6228.52	5968.37	5930.12	5651.76	5713.47	6557.89	5862.26	6337.77	5715.64	5721.95	6503.41	5969.74	7299.04	6543.13	6132.5	5831.98	6262.54	5403.64	6628.2	7319.37	5990.74	6784.38	6763.02	8048.03	6404.12	7605.41	6017.74	5907.12	6164.79	7142.5	7046.22	6114.72
feature_11911	Lrig3	178.194	165.841	154.421	107.172	132.376	135.857	110.03	121.731	168.772	167.948	149.134	133.815	160.101	244.409	158.026	166.425	149.765	196.821	133.825	150.799	218.809	154.874	148.053	155.613	129.925	127.177	170.713	211.618	149.958	168.726	165.152	188.293	144.275	164.328	177.674	166.349	209.023	149.96	203.204	146.886	211.684	204.264	229.99	191.654	161.061	163.369	203.94	179.36
feature_11921	Lrp2	579.396	501.842	218.763	188.226	295.64	325.859	254.903	378.619	574.383	272.377	399.467	357.955	335.795	627.929	465.705	478.73	386.49	420.438	486.045	474.331	471.844	506.231	258.305	363.961	171.802	315.359	361.567	541.742	222.865	483.3	484.511	376.587	460.686	476.55	640.478	656.596	548.568	517.964	516.657	545.304	507.86	471.732	294.987	493.453	341.885	455.567	489.269	594.311
feature_11922	Lrp2bp	42.6811	38.0053	66.1805	32.4217	29.7846	39.3788	37.5937	44.754	55.9464	38.7572	23.4354	41.2597	43.6638	28.0153	23.0236	20.5464	49.519	40.6578	48.3257	34.7295	41.5614	48.5427	39.9008	49.2774	51.5406	51.6981	27.8128	42.3236	38.9392	40.9899	44.77	28.9682	22.885	31.9526	31.9175	36.9665	30.2658	37.059	20.5366	27.8412	49.9683	39.3873	23.999	38.5511	33.5956	27.0726	39.2912	50.4147
feature_11924	Lrp4	1317.78	899.17	936.638	687.16	1019.3	988.407	890.328	1074.99	1217.77	850.506	1199.47	828.539	745.403	1065.55	974.317	1294.42	1026.61	1350.02	1328.96	977.909	970.581	1063.32	1095.17	1053.85	751.634	735.148	961.94	1133.21	958.568	1021.89	811.83	1135.72	897.491	985.966	935.183	1087.87	1117.94	821.33	1197.61	1097.33	1307.35	1098.26	1080.95	1330.56	844.83	1134.25	1069.28	1124.63
feature_11931	Lrrc1	810.941	784.291	927.447	725.886	774.401	749.181	762.876	742.917	842.926	739.617	788.281	805.121	783.869	954.452	940.828	862.947	763.317	958.23	898.672	763.134	1051.26	894.573	743.414	909.471	798.879	840.612	837.262	802.032	793.698	805.499	852.62	815.37	898.486	792.425	851.133	926.803	830.418	768.758	762.015	869.798	902.156	928.808	874.962	894.384	873.485	861.656	889.665	909.403
feature_11933	Lrrc10b	338.248	405.102	261.045	304.404	375.066	260.884	293.414	425.163	360.854	214.241	382.423	481.734	242.23	252.138	265.818	277.376	283.828	217.149	378.241	244.934	360.606	261.206	278.255	268	216.9	271.932	233.052	293.091	154.928	330.779	349.206	187.441	299.495	313.136	217.039	188.353	277.121	156.854	192.395	142.086	229.854	212.508	196.991	201.567	205.526	157.768	244.167	271.464
feature_11935	Lrrc14b	16.0054	9.50132	1.83835	13.509	7.72195	1.96894	5.50151	9.84589	12.1217	2.15318	2.13049	6.69076	3.11884	19.3209	9.41875	11.3005	42.2723	21.2529	21.3748	22.8483	44.0062	13.8694	34.6507	23.3419	9.66386	3.10189	4.79532	5.29045	9.11344	13.3455	11.9387	14.4841	5.97001	1.82586	2.12783	0.880155	0	3.44735	9.72785	0	9.99367	20.1516	17.9992	6.60875	11.8573	19.6043	10.2906	24.2378
feature_11938	Lrrc16b	1333.79	2218.13	3026.84	1615.68	1424.15	1579.09	1601.86	1576.24	1242.94	1284.37	1684.15	1800.93	1141.5	1309.96	1402.35	1668.36	1401.02	1278.87	1281.56	1329.77	1886.15	1072.56	1786.08	1182.66	2143.23	2558.02	1755.09	2484.4	1566.68	1799.74	1426.67	2134.28	1373.1	1721.79	1754.4	1601.88	1681.64	1571.13	1614.82	1763.6	1425.46	1493.05	1573.93	1951.78	1741.04	1696.24	1653.04	1830.44
feature_11960	Lrrc4	1797.94	1569.45	1727.13	1531.93	1721.99	1558.41	1677.04	1750.78	1646.69	1595.51	1802.39	1358.22	1618.68	2021.93	1682.82	2059.77	1744.03	2104.96	1892.14	1801.36	1716.24	1606.53	1854.34	1741.14	1642.86	1203.53	1661.1	1702.47	1454.84	1603.37	1620.67	1938.31	1379.07	1894.33	1628.86	1645.01	1652.32	1712.47	1974.75	1542.79	1777.06	1809.98	1939.92	1793.17	1652.11	1953.9	1610	1713.13
feature_11965	Lrrc45	1147.06	1819.07	2603.1	1294.17	1107.55	1268.98	1357.04	1202.99	1244.81	1290.83	1431.69	1765.24	999.069	1229.77	1407.58	1242.03	1431.22	1262.24	1115.21	1270.37	2043.84	1176.58	1473.18	1052.12	1766.34	2698.64	1760.84	2474.87	1529.4	1549.99	1328.18	1729.57	1385.04	1393.13	1910.79	1551.71	1625.84	1554.75	1477.55	1991.13	1384.58	1730.29	1418.94	1963.9	1700.53	1391.91	1827.98	1790.69
feature_11977	Lrrc58	6911.14	7048.25	5681.42	6470.83	5913.91	7233.88	6051.66	6630.76	6595.15	6566.12	6758.98	6800.04	7282.5	6906.25	7315.23	6633.39	6251.47	5632.02	6617.83	5317.26	5488.55	5707.24	5324.65	6404.34	5329.08	5267.01	5994.14	5317.96	6315.61	6076.99	6376.25	5611.31	7109.29	5865.59	6093.05	6883.69	5904.67	6146.62	6240.96	6962.22	5747.27	5685.51	5868.75	5155.93	5539.32	6216.43	6647.7	6043.94
feature_11980	Lrrc61	1468.23	1762.93	1282.25	1549.94	1492.54	1566.29	1583.52	1608.46	1363.23	1327.44	1455.12	1639.24	1326.55	1115.78	1417	1440.3	1629.3	1262.24	1552	1410.2	1411.87	1248.24	1554.03	1464.49	1671.85	1587.13	1446.27	1430.54	1635.45	1421.3	1435.63	1338.5	1405.94	1456.13	1536.3	1298.23	1387.5	1236.74	1326.23	1473.66	1474.52	1515.04	1376.94	1344.88	1460.42	1446.05	1540.78	1440.7
feature_11984	Lrrc7	880.298	750.604	772.106	726.787	607.827	851.566	783.966	773.35	807.493	1090.59	705.192	787.279	875.355	1013.38	1076.88	1005.74	803.174	983.179	897.742	923.073	858.121	892.262	926.118	792.761	929.879	794.083	1022.36	890.912	983.423	1016.17	870.528	1014.74	838.786	832.594	780.915	1306.15	1016.74	1043.68	1190.04	1435.26	889.437	733.703	775.966	1236.94	786.532	1063.3	1074.9	1108.15
feature_11992	Lrrc8a	2376.27	2965.28	2968.93	2097.5	2670.69	2667.91	2726	2774.75	2818.77	2062.75	3341.67	3001.92	3009.68	2886.54	3353.07	3423.02	2558.08	2463.49	2626.31	2566.32	2227.2	1969.45	2955.81	2474.25	2767.09	2343.99	2513.7	2856.84	2886.48	2800.66	2836.43	3442.11	2824.81	3166.96	3106.64	3267.14	3123.05	3065.55	3483.65	3249.74	3087.14	2675.59	2950.87	3277.94	2656.03	2967.72	2952.45	3230.42
feature_11994	Lrrc8c	600.737	540.712	422.82	520.548	567.011	480.421	478.632	376.829	507.247	400.491	531.557	564.254	763.077	595.084	866.525	755.079	605.098	407.502	637.527	587.659	531.741	547.839	512.41	548.968	608.823	524.219	602.292	554.439	610.601	622.475	499.434	555.508	518.396	609.838	547.917	768.375	700.843	638.621	790.118	832.356	589.626	458.908	465.98	631.136	530.613	721.625	654.853	701.927
feature_12007	Lrrn1	2399.75	1827.71	2145.35	2604.54	2349.68	2125.47	2069.49	2592.15	2224.8	2569.82	2684.42	2095.32	2324.58	3066.23	2433.18	2588.84	2308.07	2817.4	2471.11	2389.94	1904.49	2609.75	2116.84	2476.84	2058.4	1849.76	2363.13	2218.81	2229.48	1979.91	2316.1	2604.58	2093.48	2410.14	1851.22	2100.93	2293.58	2024.45	2688.13	2102.49	2812.76	2467.66	3217.86	2629.18	2077	2570.03	2141.37	2196.92
feature_12018	Lrtm2	3331.26	4491.53	3578.34	2712.62	3397.66	4056.01	4105.05	3405.78	3345.59	3628.11	4275.89	4837.42	4580.54	3158	5589.5	5280.41	4065.39	2989.27	4319.57	4097.16	3974	3328.64	4481.49	3998.39	3742.06	3310.75	2922.27	3093.86	3511.16	3551.82	3649.25	3119.2	3950.16	3613.38	3388.58	3074.38	3929.83	3174.14	3473.93	3836.33	2859.1	3445.93	2896.87	3215.16	3007.79	2963.98	2763.48	2931.81
feature_12026	Lsm14a	4033.37	3815.21	3514	3859.98	3782.65	4320.84	3931.75	3797.83	4038.4	3882.18	3907.32	3885.1	4559.75	4338.51	4598.44	4214.06	3779.14	4121.22	4317.71	3854.97	3943.44	4195.48	3514.42	4244.77	3672.27	3557.87	3774.87	3430.33	4255.98	3585.19	4039.25	3695.15	4473.53	3688.24	3917.34	3987.1	3923.21	3833.45	4059.76	3962.09	3674.04	3977.2	3866.83	3743.86	3746.9	3947.93	3989.93	3922.65
feature_12038	Lss	1422.35	1650.64	1487.22	1223.02	1400.98	1678.52	1560.6	1578.92	1531.07	1676.25	1678.83	1828.81	1643.63	1380.48	1768.63	1755.69	1481.95	1324.15	1597.54	1310.58	1530.44	1428.54	1463.73	1545.75	1341.13	1679.16	1522.03	1343.77	1571.65	1488.03	1556.01	1479.08	1390.02	1467.99	1557.57	1733.03	1431.95	1471.15	1453.77	1561.99	1355.5	1243.91	1129.95	1662.1	1438.68	1357.36	1579.13	1485.29
feature_12056	Luc7l2	8252.4	9051.3	9014.34	8067.6	8158.79	10645.1	8952.79	9127.14	9577.09	9836.8	8642.33	9444	9620.59	9959.92	10014.2	9104.09	9177.92	8875.4	8957.91	8488.61	9175.29	9005.83	7600.05	9030.74	8027.45	9579.67	9152.34	8144.12	9118.41	8240.88	8835.61	8088.1	10213.7	7885.9	9034.78	9172.1	8231.36	8770.91	8770.2	9265.36	7354.43	7566.03	7408.68	7699.2	8071.84	8206.73	8558	7920.92
feature_12121	Lzic	314.773	315.271	320.792	275.584	304.465	328.813	324.589	329.39	387.895	349.892	335.552	381.373	344.112	375.791	380.936	342.097	309.192	328.958	348.502	307.082	349.605	367.538	334.957	322.465	294.211	355.683	341.426	234.896	304.886	350.797	288.518	320.354	278.6	313.136	307.472	345.021	358.461	330.945	376.144	388.817	377.942	312.351	347.985	371.192	289.515	356.612	385.428	339.329
[truncated: 19,825 more rows]
[truncated: 16 more columns]
